# Supplementary material for: Molecular signatures define alopecia areata subtypes and transcriptional biomarkers
Source: PubMed Central journal article supplement (PMC4909368; doi:10.1016/j.ebiom.2016.03.036), 2016-03-31
Supplement: mmc1.pdf [file mmc1.pdf]

## Supplemental Materials

### Supplemental Materials and Methods

#### *Generating a linear Euclidean classifier for AA severity*

Principal component analysis and terrain mapping of the AA disease signature revealed a near-linear dependency between NC, AAP, and AT/AU patients in an expression space defined by the first two principal components (PCs). The expression terrain map was generated with the MeV software suite using Euclidean distance as a metric and 10 nearest-neighbors as a clustering parameter. In order to convert this into a more intuitive, numeric score predictive of severity, we generated a list of genes that significantly contributed to PC1 and PC2. This was done by rank-sorting the genes' weighted contributions to each PC and selecting the set of genes before the inflection point of the weight distribution. The expression vectors of these genes were then z-score transformed and rank-normalized to generate non-zero, statistically comparable expression values. On a patient-by-patient basis, all genes in each normalized vector were used to construct centroid values in the appropriate PC vector. Each centroid value subsequently corresponds to a cardinal point in a grid defined as PC1xPC2 for each patient. The linear distance between each centroid (each patient's molecular state regarding AA) and the origin  $PC1_{\min} \times PC2_{\min}$  was obtained by Euclidean distance to create a single scalar representation of that sample's deviation from an unaffected molecular state within the AA signature space. The vector was then quantile-normalized to bind the values between 0 and 10 for presentation.

### *Generating the consensus Immune Gene Signatures*

Unique signature genes for each of the infiltrate populations were adopted from a previous work characterizing infiltration in cancers based on expression profiling (1). To generate relative classifiers ranking infiltration, each group of mutually exclusive genes were tested for co-segregation and classification power independently (Supplemental Fig 4) before being integrated into a consensus score for each individual patient. Integration was done in the following steps: z-score transforming all gene vectors to obtain scale-comparable expression values; rank-transforming these vectors to obtain ordered, non-negative values for each gene signal; and finally averaging over the ranks to create a consensus value of the rank-ordered expression for each infiltrating tissue. For the estimation of total infiltrate load per sample, the consensus z-score was transformed back into expression space for each individual gene and normalized to the consensus of housekeeping genes with the minimum coefficient of variation across the population, in a patient-by-patient basis.

The following table shows the signatures for each cell type:

| <b>Cell</b> | <b>Symbol</b> | <b>Entrez</b> | <b>Probe</b> |
|-------------|---------------|---------------|--------------|
| aDCs        | CCL1          | 6346          | 207533_at    |
| aDCs        | CD83          | 9308          | 204440_at    |
| aDCs        | LAMP3         | 27074         | 205569_at    |
| B-cells     | BLK           | 640           | 210934_at    |
| B-cells     | CD19          | 930           | 206398_s_at  |
| B-cells     | MS4A1         | 931           | 228599_at    |
| DCs         | CCL13         | 6357          | 216714_at    |
| DCs         | CCL17         | 6361          | 207900_at    |

|                 |        |        |              |
|-----------------|--------|--------|--------------|
| DCs             | CCL22  | 6367   | 207861_at    |
| DCs             | CD209  | 30835  | 207278_s_at  |
| Eosinophils     | CCR3   | 1232   | 208304_at    |
| Eosinophils     | GPR44  | 11251  | 216464_x_at  |
| Eosinophils     | IL5RA  | 3568   | 211517_s_at  |
| iDCs            | CD1A   | 909    | 210325_at    |
| iDCs            | CD1E   | 913    | 215784_at    |
| Macrophages     | CCL7   | 6354   | 208075_s_at  |
| Macrophages     | CXCL5  | 6374   | 215101_s_at  |
| Macrophages     | FN1    | 2335   | 216442_x_at  |
| Macrophages     | MSR1   | 4481   | 214770_at    |
| Macrophages     | PPBP   | 5473   | 214146_s_at  |
| mast cells      | CMA1   | 1215   | 214533_at    |
| mast cells      | MS4A2  | 2206   | 207497_s_at  |
| mast cells      | TPSAB1 | 7177   | 216485_s_at  |
| Neutrophils     | FPRL1  | 2358   | 210773_s_at  |
| Neutrophils     | IL8RA  | 3577   | 207094_at    |
| Neutrophils     | IL8RB  | 3579   | 207008_at    |
| NK cells        | NCR1   | 9437   | 217095_x_at  |
| NK cells        | XCL1   | 6375   | 206366_x_at  |
| Normal          | DCN    | 1634   | 242605_at    |
| pDC             | CLEC4C | 170482 | 1555687_a_at |
| T-cells         | CD2    | 914    | 205831_at    |
| T-cells         | CD247  | 919    | 210031_at    |
| T-cells         | CD28   | 940    | 211861_x_at  |
| T-cells         | CD3E   | 916    | 205456_at    |
| T-cells         | CD3G   | 917    | 206804_at    |
| T-cells         | CD6    | 923    | 213958_at    |
| T-cells         | IL2RB  | 3560   | 205291_at    |
| T-cells         | ZAP70  | 7535   | 214032_at    |
| CD8 T-cells     | CD8A   | 925    | 205758_at    |
| CD8 T-cells     | PRF1   | 5551   | 214617_at    |
| Cytotoxic cells | KLRF1  | 51348  | 220646_s_at  |
| Cytotoxic cells | GNLY   | 10578  | 37145_at     |
| Cytotoxic cells | GZMA   | 3001   | 205488_at    |
| Cytotoxic cells | GZMH   | 2999   | 210321_at    |
| Cytotoxic cells | GZMK   | 3003   | 206666_at    |
| Tem             | LTK    | 4058   | 217184_s_at  |
| Tem             | NFATC4 | 4776   | 236270_at    |

|         |         |       |             |
|---------|---------|-------|-------------|
| Th      | CD4     | 920   | 216424_at   |
| Th1     | CD38    | 952   | 205692_s_at |
| Th1     | CSF2    | 1437  | 210229_s_at |
| Th1     | CTLA4   | 1493  | 236341_at   |
| Th1     | IFNG    | 3458  | 210354_at   |
| Th1     | IL12RB2 | 3595  | 206999_at   |
| Th1     | LTA     | 4049  | 206975_at   |
| Th1     | STAT4   | 6775  | 206118_at   |
| Th1     | TBX21   | 30009 | 220684_at   |
| Th17    | IL17A   | 3605  | 216876_s_at |
| Th17    | RORC    | 6097  | 228806_at   |
| Th2     | CXCR6   | 10663 | 211469_s_at |
| Th2     | GATA3   | 2625  | 209604_s_at |
| Th2     | IL26    | 55801 | 221111_at   |
| Th2     | LAIR2   | 3904  | 207509_s_at |
| Th2     | PMCH    | 5367  | 206942_s_at |
| Th2     | SMAD2   | 4087  | 239271_at   |
| Tfh     | BLR1    | 643   | 216734_s_at |
| Tfh     | CXCL13  | 10563 | 205242_at   |
| Tfh/Th2 | MAF     | 4094  | 209348_s_at |
| Tfh     | PDCD1   | 5133  | 207634_at   |
| Treg    | FOXP3   | 50943 | 224211_at   |

### *Unsupervised Machine Learning, Weighted Gene Co-Expression Analysis*

Weighted Gene Co-expression Analysis (WGCNA) (2) was performed on the PSIDs in the ComBat adjusted expression set whose variance exceeded the median of the variances of all the PSIDs. Adjacency between PSIDs was defined as the Pearson correlation of the expression profiles across samples raised to a soft-thresholding power equal which was set to 10. The resulting adjacency matrix was transformed into a Topological Overlap matrix (TOM) from which the dissimilarity matrix was calculated. Hierarchical clustering was performed on the

dissimilarity matrix and modules were identified from the resulting branches of the dendrogram (2). The coexpression heatmap and dendrogram in Fig 5 were created from stratified sampling of 1/3 of the PSIDs assigned to the 20 modules using TOM as the adjacency measure. Kruskal-Wallis tests were performed to test for association between module eigengenes and the categorical traits disease phenotype, gender, and originating NAAF site. Pearson's correlation coefficient and p-values were estimated between each module eigengene and subject age. Gene Set Enrichment Analysis (GSEA) (3, 4) was used to further test for overrepresentation of genes over/under expressed in AA with respect to Normal controls in the different WGCNA modules. The normalized enrichment score (NES) reflects the degree to which a gene set is overrepresented at the top or bottom of a ranked list of genes taking into account differences in module size. Preranked gene lists were created with the t-statistic for ranking.

## Supplemental Methods References

1. Bindea G et al. (2013) Spatiotemporal dynamics of intratumoral immune cells reveal the immune landscape in human cancer. *Immunity* 39:782–795.
2. Langfelder P, Horvath S (2008) WGCNA: an R package for weighted correlation network analysis. *BMC Bioinformatics* 9:559.
3. Subramanian A et al. (2005) Gene set enrichment analysis: a knowledge-based approach for interpreting genome-wide expression profiles. *Proc Natl Acad Sci USA* 102:15545–15550.
4. Mootha VK et al. (2003) PGC-1 $\alpha$ -responsive genes involved in oxidative phosphorylation are coordinately downregulated in human diabetes. *Nat Genet* 34:267–273.

## Supplemental Fig 1

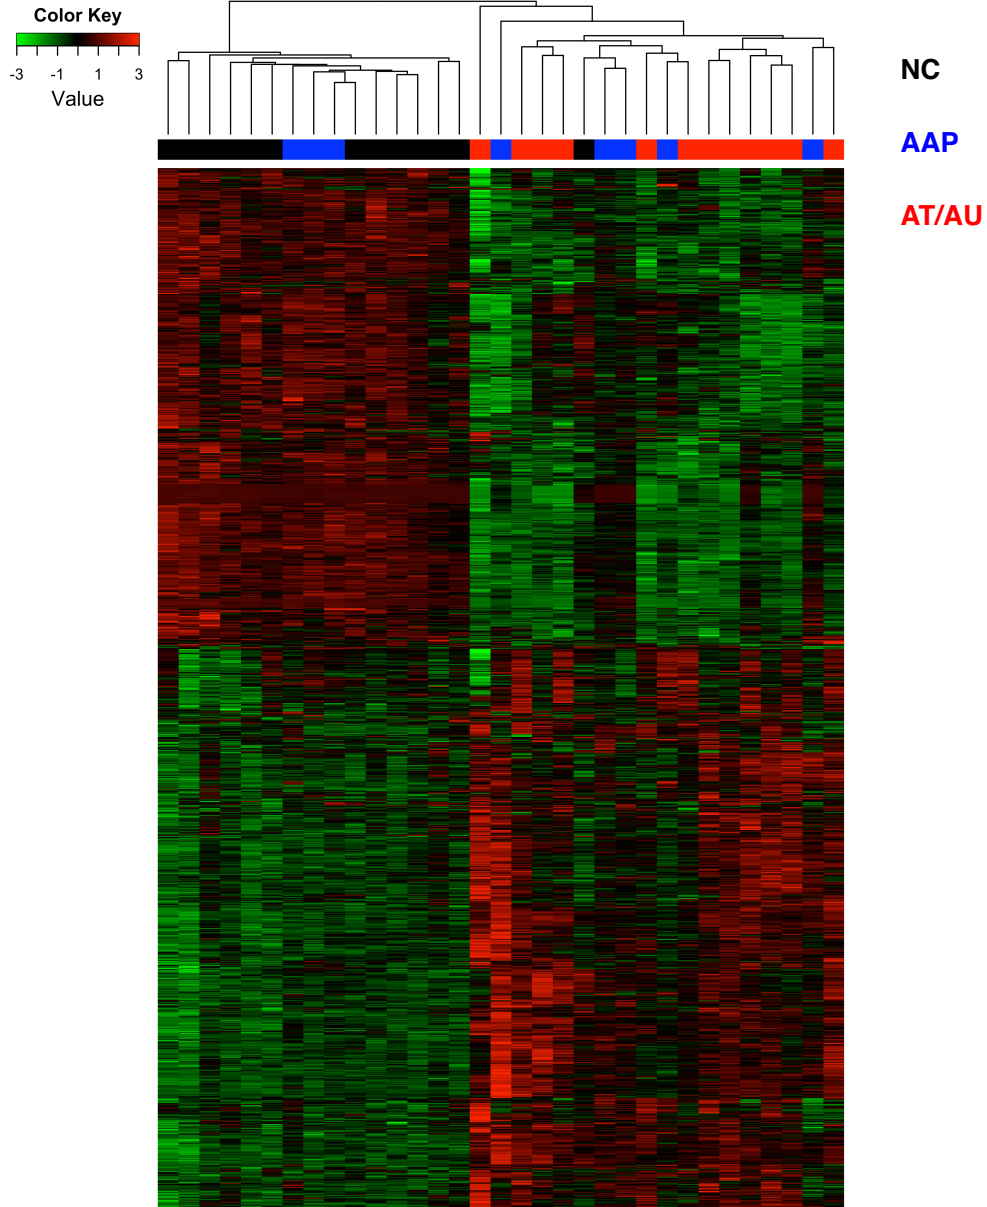

**Supplemental Fig 1. AA Validation Set.** Dendrogram and heatmap of the 33 samples in the validation dataset. Hierarchical clustering using Euclidean distance and average linkage was performed using the 2002 Affymetrix PSIDs that were identified as differentially expressed between AA patients and normal controls in the Discovery dataset were used to cluster the samples.

## Supplemental Fig 2

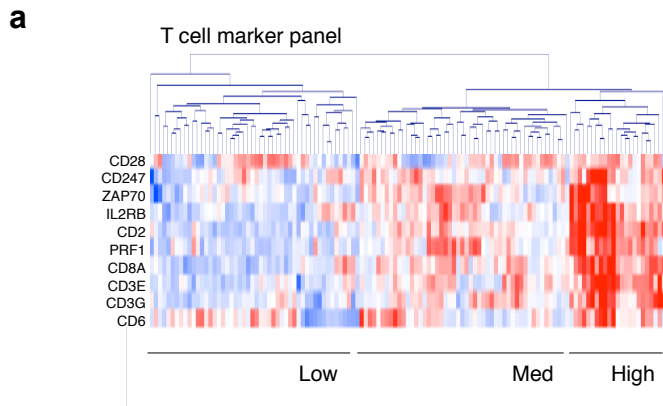

**b**

| %     | Low | Med | High |
|-------|-----|-----|------|
| N     | 72  | 26  | 2    |
| AAP   | 41  | 47  | 12   |
| AT/AU | 22  | 33  | 45   |

$$\chi^2 = 33.36$$

$$p = 1 \times 10^{-6}$$

**Supplemental Fig 2. T cell immune gene signature among AA samples. (a)** Unsupervised consensus clustering of AA patients and unaffected controls using signature genes unique to each infiltrating immune tissue allows for the relative quantification of infiltrates in each sample. In this heatmap, red indicates higher expression and white indicates lower expression. Three main superclusters are demarcated as Low, Medium (Med), and High relative levels of infiltration based on marker expression. **(b)** The three infiltration superclusters are statistically significantly correlated with prognosis. A 3x3 chi-squared test reveals that the severity of infiltration is predictive of the severity of the AA phenotype across these patients. The numbers displayed in each cell represents the percentage of each clinical presentation that is found in the accompanying supercluster, e.g., 72% of NC samples were found in the Low cluster. The chi-squared statistic and accompanying p-value are provided.



### Supplemental Fig 3

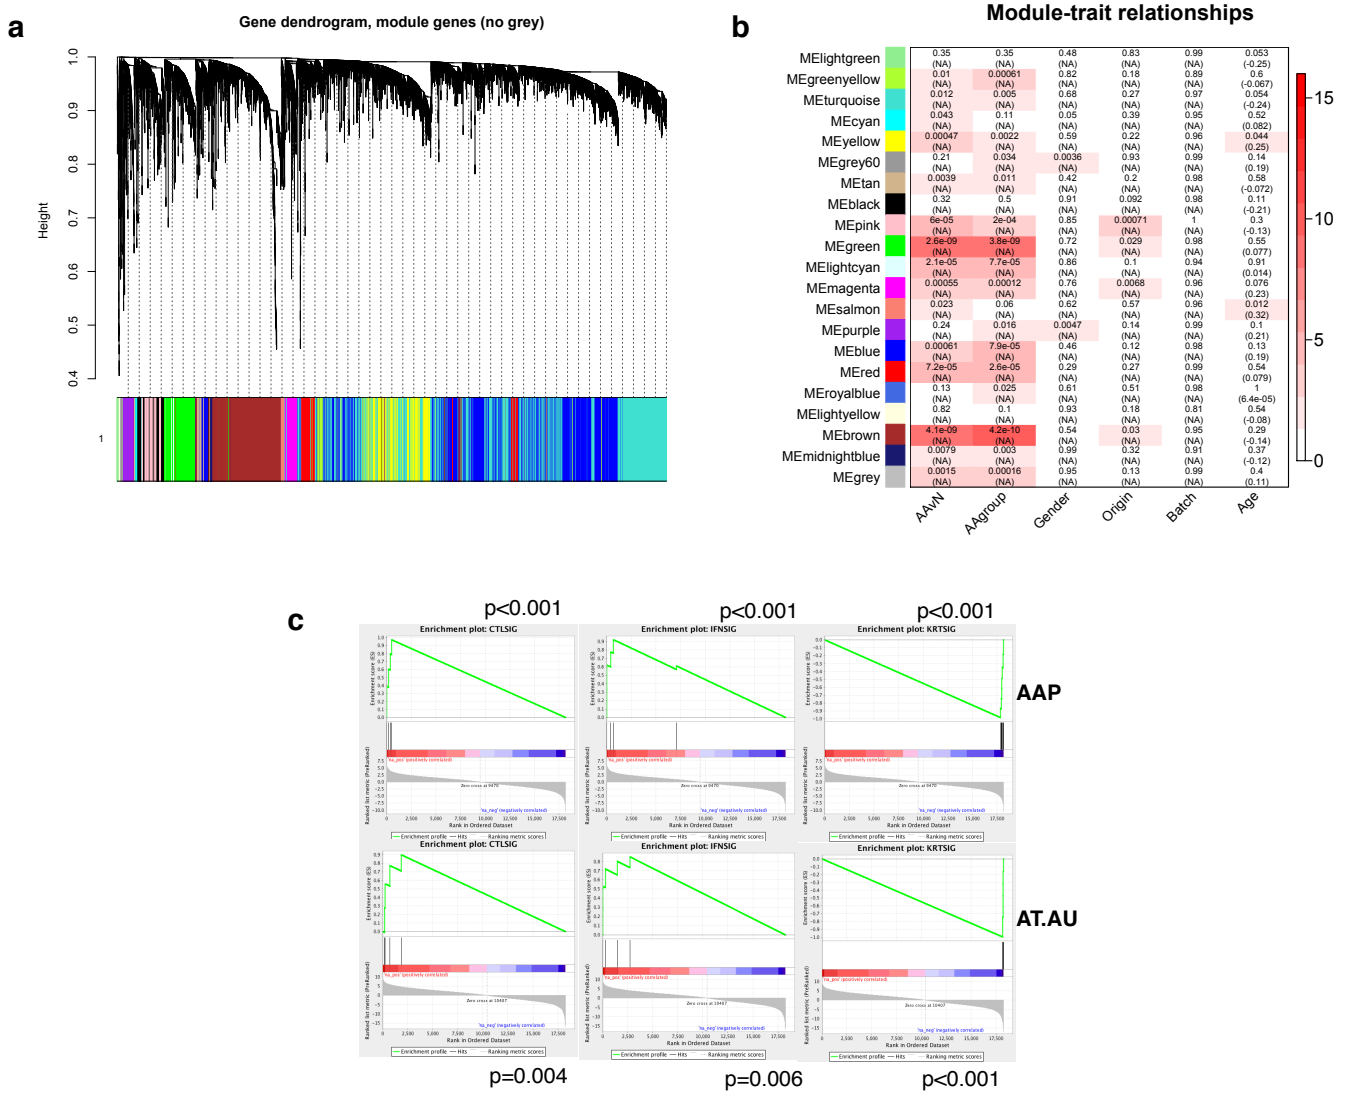

**Supplemental Fig 3. Modules in AA disease specific signature define ALADIN components.** (a) A dendrogram reflecting the gene co-expression clustering results. Along the bottom the colored barcode indicates the divisions that identified the 20 co-expressed modules used in this work. (b) A table of results when testing several clinical traits for association with the twenty modules. Displayed in each cell are the p-values for association between the corresponding module and trait. Cells are colored in increasing red to correspond to the significance of the association. (c) Gene Set Enrichment Analyses testing for statistical enrichment of each of the original ALADIn pathways in the AA cohort. In all comparisons against unaffected controls, there was statistical enrichment of the genes in the IFN, CTL, and KRT pathways in the direction expected (IFN and CTL are positively enriched, KRT is negatively enriched).

**Supplemental Fig 4**

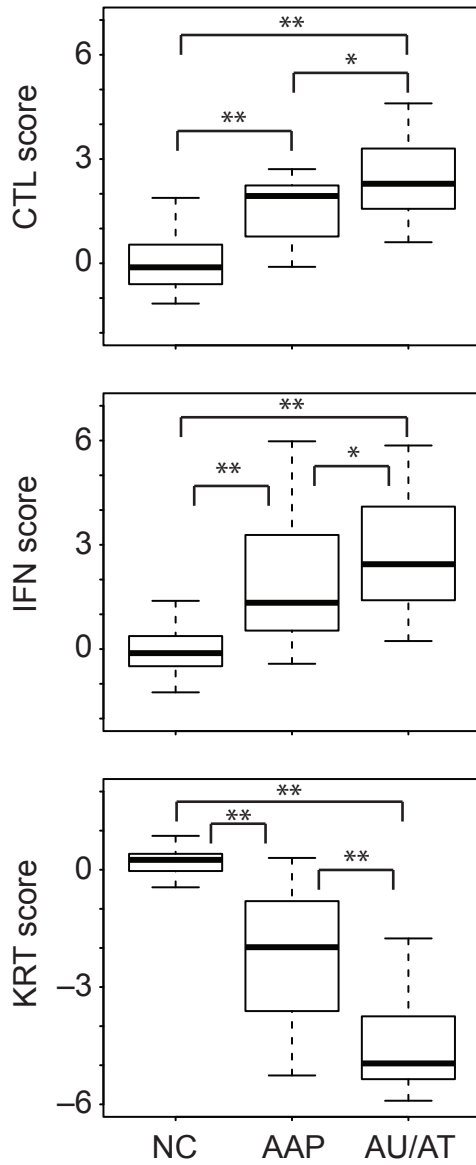

**Supplemental Fig 4. ALADIN components differentiate AA phenotypes and normal controls.** CTL (top panel), IFN (middle panel), and KRT (bottom panel) components of ALADIN were compared among normal control, AAP, and AU/AT samples. \*  $p < 0.05$ ; \*\*  $p < 0.0001$

**Supplemental Fig 5**

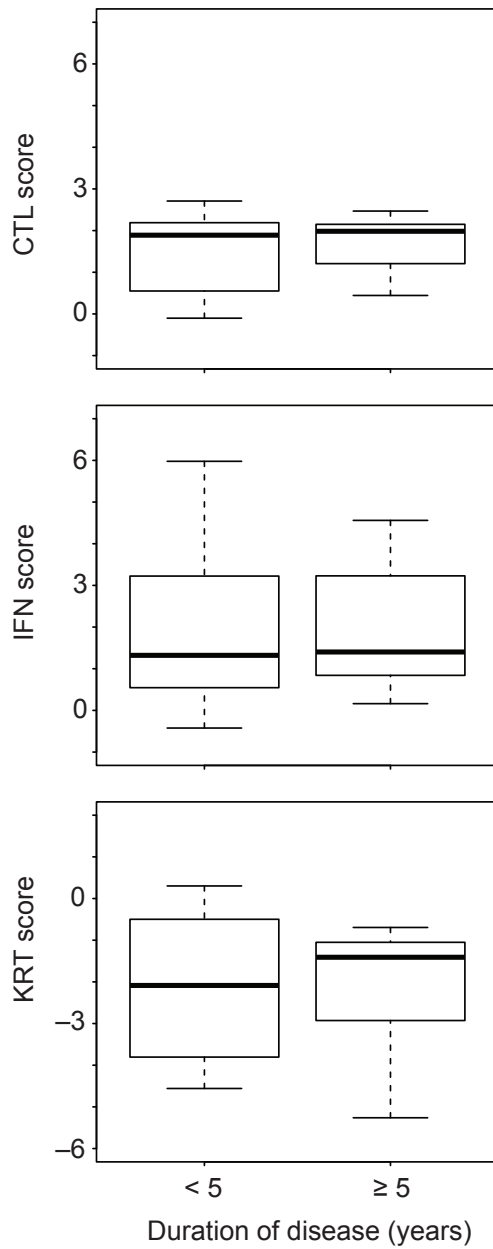

**Supplemental Fig 5. Duration does not significantly influence ALADIN component scores among AAP patients.** CTL (top panel), IFN (middle panel), and KRT (bottom panel) components of ALADIN were compared among AAP patients with less than 5 years duration or at least 5 years duration. No significant differences were found.

Supplemental Tables

Supplemental Table 1. Patient Demographics

Demographics for AT/AU, AAP/AAT, Normal samples

|                                                         |                               | Discovery Set    | Validation Set   | Total            |
|---------------------------------------------------------|-------------------------------|------------------|------------------|------------------|
| <b>Number (Proportion) of Patients by phenotype</b>     | <b>AT/AU</b>                  | 20 (0.317)       | 12 (0.364)       | 32 (0.333)       |
|                                                         | <b>AAP/AAT (perilesional)</b> | 20 (0.317)       | 8 (0.242)        | 28 (0.292)       |
|                                                         | <b>Normal Controls</b>        | 23 (0.365)       | 13 (0.394)       | 36 (0.375)       |
|                                                         | <b>Total</b>                  | 63               | 33               | 96               |
| <b>Number (Proportion) of Females by Phenotype</b>      | <b>AT/AU</b>                  | 14 (0.7)         | 10 (0.833)       | 24 (0.75)        |
|                                                         | <b>AAP/AAT (perilesional)</b> | 11 (0.55)        | 6 (0.75)         | 17 (0.607)       |
|                                                         | <b>Normal Controls</b>        | 14 (0.61)        | 9 (0.692)        | 23 (0.639)       |
|                                                         | <b>Total</b>                  | 39 (0.619)       | 25 (0.758)       | 64 (0.667)       |
| <b>Number (Proportion) of Samples by Center</b>         | <b>Columbia</b>               | 37 (0.587)       | 15 (0.455)       | 52 (0.542)       |
|                                                         | <b>Houston</b>                | 17 (0.270)       | 5 (0.152)        | 22 (0.229)       |
|                                                         | <b>Minnesota</b>              | 7 (0.111)        | 3 (0.0909)       | 10 (0.104)       |
|                                                         | <b>San Francisco</b>          | 2 (0.0317)       | 10 (0.303)       | 12 (0.125)       |
|                                                         | <b>Total</b>                  | 63               | 33               | 96               |
| <b>Mean Age in yrs [range] by phenotype</b>             | <b>AT/AU</b>                  | 42.1 [18,67]     | 45.6 [22,66]     | 43.4 [18,67]     |
|                                                         | <b>AAP/AAT</b>                | 37.3 [26,55]     | 41.9 [16,66]     | 38.6 [16,66]     |
|                                                         | <b>Normal Controls</b>        | 38.5 [23,61]     | 36.3 [23,53]     | 37.7 [23,61]     |
|                                                         | <b>All samples</b>            | 39.3 [18,67]     | 41.0 [16,66]     | 39.89 [16,67]    |
| <b>Mean Lesion Duration in yrs [range] by phenotype</b> | <b>AT/AU</b>                  | 10.30 [0.083,37] | 14.17 [1,37]     | 11.75 [0.083,37] |
|                                                         | <b>AAP/AAT</b>                | 8.53 [0.019,39]  | 5.27 [0.167,20]  | 7.60 [0.019,39]  |
|                                                         | <b>All AA samples</b>         | 9.42 [0.019,39]  | 10.61 [0.167,37] | 9.81 [0.019,39]  |

## Supplemental Table 2. AA v NC Differential Expression

| ProbeSetID   | GeneSymbol             | logFC | F    | p.value  | BH_fdr   |
|--------------|------------------------|-------|------|----------|----------|
| 203915_at    | CXCL9                  | 3.57  | 11.9 | 3.40E-12 | 8.26E-10 |
| 204533_at    | CXCL10                 | 3.08  | 8.48 | 1.50E-10 | 2.01E-08 |
| 209728_at    | HLA-DRB4               | 3.01  | 8.04 | 5.24E-04 | 3.92E-03 |
| 204580_at    | MMP12                  | 2.86  | 7.27 | 1.92E-08 | 1.13E-06 |
| 209924_at    | CCL18 /// LOC101060271 | 2.77  | 6.82 | 5.73E-09 | 4.06E-07 |
| 32128_at     | CCL18 /// LOC101060271 | 2.72  | 6.59 | 1.89E-08 | 1.11E-06 |
| 206407_s_at  | CCL13                  | 2.13  | 4.37 | 7.86E-11 | 1.21E-08 |
| 216714_at    | CCL13                  | 2.04  | 4.11 | 2.54E-10 | 3.12E-08 |
| 205758_at    | CD8A                   | 1.88  | 3.68 | 7.27E-11 | 1.14E-08 |
| 219386_s_at  | SLAMF8                 | 1.82  | 3.54 | 2.55E-12 | 6.55E-10 |
| 1405_i_at    | CCL5                   | 1.72  | 3.3  | 2.81E-12 | 7.07E-10 |
| 205821_at    | KLRC4-KLRK1 /// KLRK1  | 1.7   | 3.26 | 1.58E-12 | 4.39E-10 |
| 213537_at    | HLA-DPA1               | 1.69  | 3.23 | 6.01E-08 | 2.95E-06 |
| 204655_at    | CCL5                   | 1.68  | 3.21 | 1.04E-11 | 2.25E-09 |
| 205987_at    | CD1C                   | 1.66  | 3.17 | 1.33E-13 | 5.23E-11 |
| 206749_at    | CD1B                   | 1.64  | 3.12 | 3.14E-07 | 1.10E-05 |
| 205831_at    | CD2                    | 1.54  | 2.91 | 5.15E-10 | 5.64E-08 |
| 215666_at    | HLA-DRB4               | 1.53  | 2.89 | 3.93E-03 | 1.82E-02 |
| 205488_at    | GZMA                   | 1.52  | 2.86 | 3.88E-08 | 2.02E-06 |
| 217147_s_at  | TRAT1                  | 1.51  | 2.85 | 1.92E-07 | 7.35E-06 |
| 1558972_s_at | THEMIS                 | 1.46  | 2.75 | 1.49E-08 | 9.14E-07 |
| 229641_at    | CCBE1                  | 1.43  | 2.69 | 6.99E-10 | 7.22E-08 |
| 216935_at    | LINC00302              | 1.43  | 2.69 | 1.37E-06 | 3.62E-05 |
| 229437_at    | MIR155 /// MIR155HG    | 1.43  | 2.69 | 1.42E-08 | 8.78E-07 |
| 216718_at    | LINC00302              | 1.42  | 2.67 | 4.19E-06 | 8.99E-05 |
| 206666_at    | GZMK                   | 1.4   | 2.65 | 7.06E-07 | 2.12E-05 |
| 206715_at    | TFEC                   | 1.4   | 2.64 | 1.38E-08 | 8.54E-07 |
| 213475_s_at  | ITGAL                  | 1.4   | 2.63 | 1.48E-09 | 1.32E-07 |
| 214617_at    | PRF1                   | 1.38  | 2.61 | 2.04E-07 | 7.69E-06 |
| 1559263_s_at | ZC3H12D                | 1.38  | 2.6  | 1.13E-11 | 2.37E-09 |
| 228592_at    | MS4A1                  | 1.37  | 2.59 | 1.16E-03 | 7.27E-03 |
| 220005_at    | P2RY13                 | 1.37  | 2.59 | 1.19E-10 | 1.69E-08 |
| 235221_at    | CBLN3                  | 1.36  | 2.57 | 1.76E-06 | 4.40E-05 |
| 1552870_s_at | AXDND1                 | 1.36  | 2.56 | 1.66E-05 | 2.71E-04 |
| 238725_at    | IRF1                   | 1.34  | 2.54 | 1.86E-09 | 1.59E-07 |
| 210247_at    | SYN2                   | 1.33  | 2.51 | 6.59E-08 | 3.17E-06 |
| 206637_at    | P2RY14                 | 1.32  | 2.5  | 2.61E-12 | 6.64E-10 |
| 211657_at    | CEACAM6                | 1.32  | 2.5  | 8.84E-06 | 1.63E-04 |
| 216920_s_at  | TARP /// TRGC2         | 1.32  | 2.5  | 1.23E-06 | 3.32E-05 |
| 210146_x_at  | LILRB2                 | 1.31  | 2.48 | 1.17E-06 | 3.20E-05 |

|                  |                           |      |      |          |          |
|------------------|---------------------------|------|------|----------|----------|
| 204891_s_at      | LCK                       | 1.31 | 2.48 | 9.61E-10 | 9.50E-08 |
| 1552584_at       | IL12RB1                   | 1.31 | 2.48 | 5.29E-09 | 3.82E-07 |
| 214321_at        | NOV                       | 1.29 | 2.44 | 2.23E-08 | 1.28E-06 |
| 226218_at        | IL7R                      | 1.29 | 2.44 | 1.73E-07 | 6.73E-06 |
| 215049_x_at      | CD163                     | 1.29 | 2.44 | 3.98E-09 | 3.03E-07 |
| 210915_x_at      | TRBC1                     | 1.29 | 2.44 | 1.34E-09 | 1.23E-07 |
| 211796_s_at      | TRBC1                     | 1.29 | 2.44 | 8.37E-08 | 3.80E-06 |
| 219607_s_at      | MS4A4A                    | 1.28 | 2.44 | 8.69E-08 | 3.92E-06 |
| 211656_x_at      | HLA-DQB1 /// LOC101060835 | 1.28 | 2.43 | 2.47E-09 | 2.01E-07 |
| 205890_s_at      | GABBR1 /// UBD            | 1.28 | 2.43 | 1.60E-06 | 4.10E-05 |
| 216233_at        | CD163                     | 1.28 | 2.42 | 5.86E-08 | 2.89E-06 |
| 227346_at        | IKZF1                     | 1.27 | 2.42 | 5.64E-10 | 6.02E-08 |
| 206134_at        | ADAMDEC1                  | 1.27 | 2.41 | 1.86E-07 | 7.16E-06 |
| 236295_s_at      | NLRC3                     | 1.27 | 2.41 | 6.69E-09 | 4.62E-07 |
| 224555_x_at      | IL37                      | 1.27 | 2.41 | 1.97E-06 | 4.82E-05 |
| 204714_s_at      | F5                        | 1.26 | 2.4  | 1.44E-06 | 3.74E-05 |
| 213193_x_at      | TRBC1                     | 1.26 | 2.4  | 5.66E-09 | 4.02E-07 |
| 211339_s_at      | ITK                       | 1.26 | 2.4  | 2.97E-07 | 1.05E-05 |
| 210176_at        | TLR1                      | 1.26 | 2.4  | 9.76E-11 | 1.45E-08 |
| 228381_at        | ATF7IP2 /// LOC100287628  | 1.26 | 2.4  | 1.37E-06 | 3.61E-05 |
| 213240_s_at      | KRT4                      | 1.26 | 2.39 | 1.63E-06 | 4.16E-05 |
| 227553_at        | PIK3R5                    | 1.25 | 2.38 | 4.09E-09 | 3.10E-07 |
| 244413_at        | CLECL1                    | 1.25 | 2.37 | 2.45E-08 | 1.39E-06 |
| 206545_at        | CD28                      | 1.23 | 2.35 | 1.96E-06 | 4.81E-05 |
| 203645_s_at      | CD163                     | 1.23 | 2.35 | 2.18E-08 | 1.26E-06 |
| 213539_at        | CD3D                      | 1.23 | 2.35 | 1.81E-10 | 2.34E-08 |
| 219890_at        | CLEC5A                    | 1.22 | 2.33 | 1.41E-07 | 5.75E-06 |
| 204205_at        | APOBEC3G                  | 1.22 | 2.33 | 2.85E-10 | 3.44E-08 |
| 231776_at        | EOMES                     | 1.22 | 2.33 | 7.97E-06 | 1.51E-04 |
| 227194_at        | FAM3B                     | 1.22 | 2.32 | 3.21E-07 | 1.12E-05 |
| 214038_at        | CCL8                      | 1.21 | 2.31 | 9.48E-07 | 2.68E-05 |
| 215806_x_at      | TARP /// TRGC2            | 1.2  | 2.3  | 3.16E-06 | 7.11E-05 |
| 204869_at        | PCSK2                     | 1.2  | 2.3  | 7.12E-07 | 2.14E-05 |
| 204446_s_at      | ALOX5                     | 1.19 | 2.28 | 2.57E-07 | 9.26E-06 |
| 228362_s_at      | FAM26F                    | 1.19 | 2.28 | 3.98E-07 | 1.32E-05 |
| 1557570_a_a<br>t | LOC285084                 | 1.19 | 2.28 | 3.34E-05 | 4.67E-04 |
| 206296_x_at      | MAP4K1                    | 1.18 | 2.27 | 6.23E-10 | 6.54E-08 |
| 215228_at        | NHLH2                     | 1.18 | 2.26 | 1.75E-05 | 2.82E-04 |
| 214219_x_at      | MAP4K1                    | 1.17 | 2.25 | 4.12E-10 | 4.69E-08 |
| 203757_s_at      | CEACAM6                   | 1.17 | 2.25 | 1.69E-05 | 2.75E-04 |
| 209823_x_at      | HLA-DQB1 /// LOC101060835 | 1.17 | 2.25 | 8.27E-08 | 3.78E-06 |
| 236028_at        | IBSP                      | 1.17 | 2.25 | 5.52E-06 | 1.12E-04 |

|             |                   |      |      |          |          |
|-------------|-------------------|------|------|----------|----------|
| 228869_at   | SNX20             | 1.16 | 2.24 | 3.28E-09 | 2.56E-07 |
| 205419_at   | GPR183            | 1.16 | 2.23 | 2.96E-08 | 1.64E-06 |
| 206082_at   | HCP5              | 1.16 | 2.23 | 1.44E-10 | 1.94E-08 |
| 230983_at   | FAM129C           | 1.15 | 2.23 | 4.44E-05 | 5.80E-04 |
| 209606_at   | CYTIP             | 1.15 | 2.22 | 7.01E-09 | 4.81E-07 |
| 235080_at   | CLUAP1            | 1.15 | 2.22 | 3.07E-07 | 1.08E-05 |
| 221080_s_at | DENND1C           | 1.15 | 2.22 | 1.32E-07 | 5.46E-06 |
| 203416_at   | CD53              | 1.15 | 2.22 | 4.54E-10 | 5.04E-08 |
| 211144_x_at | TARP /// TRGC2    | 1.15 | 2.21 | 2.48E-06 | 5.84E-05 |
| 210164_at   | GZMB              | 1.14 | 2.21 | 8.32E-07 | 2.42E-05 |
| 227645_at   | PIK3R5            | 1.14 | 2.21 | 1.18E-09 | 1.11E-07 |
| 236285_at   | KLHDC7B           | 1.14 | 2.2  | 9.81E-06 | 1.77E-04 |
| 203471_s_at | PLEK              | 1.14 | 2.2  | 6.13E-09 | 4.29E-07 |
| 229779_at   | COL4A4            | 1.14 | 2.2  | 5.20E-06 | 1.07E-04 |
| 214339_s_at | MAP4K1            | 1.13 | 2.19 | 1.40E-09 | 1.27E-07 |
| 230753_at   | PATL2             | 1.13 | 2.19 | 3.51E-08 | 1.87E-06 |
| 205043_at   | CFTR              | 1.13 | 2.19 | 1.72E-04 | 1.67E-03 |
| 206227_at   | CILP              | 1.13 | 2.18 | 4.12E-05 | 5.47E-04 |
| 236175_at   | TRIM55            | 1.12 | 2.18 | 1.82E-05 | 2.90E-04 |
| 221470_s_at | IL37              | 1.12 | 2.18 | 9.79E-05 | 1.07E-03 |
| 44673_at    | SIGLEC1           | 1.12 | 2.18 | 1.53E-08 | 9.29E-07 |
| 228094_at   | AMICA1            | 1.12 | 2.18 | 1.81E-10 | 2.34E-08 |
| 229391_s_at | FAM26F            | 1.12 | 2.17 | 5.03E-07 | 1.60E-05 |
| 1554748_at  | CLCNKB            | 1.12 | 2.17 | 8.13E-05 | 9.37E-04 |
| 239529_at   | C5orf20 /// TIFAB | 1.12 | 2.17 | 1.32E-08 | 8.23E-07 |
| 236782_at   | SAMD3             | 1.12 | 2.17 | 5.77E-06 | 1.16E-04 |
| 242641_at   | COL6A6            | 1.12 | 2.17 | 4.11E-05 | 5.46E-04 |
| 220507_s_at | UPB1              | 1.12 | 2.17 | 2.15E-03 | 1.16E-02 |
| 209813_x_at | TARP              | 1.11 | 2.16 | 1.89E-06 | 4.66E-05 |
| 1564474_at  | ZBED3-AS1         | 1.11 | 2.16 | 2.52E-05 | 3.76E-04 |
| 206761_at   | CD96              | 1.11 | 2.15 | 6.85E-08 | 3.26E-06 |
| 214567_s_at | XCL1 /// XCL2     | 1.1  | 2.15 | 1.48E-07 | 5.93E-06 |
| 1555993_at  | CACNA1D           | 1.1  | 2.14 | 1.52E-08 | 9.28E-07 |
| 229383_at   | 1-Mar             | 1.1  | 2.14 | 3.30E-09 | 2.57E-07 |
| 203761_at   | SLA               | 1.1  | 2.14 | 4.62E-11 | 7.68E-09 |
| 214450_at   | CTSW              | 1.1  | 2.14 | 1.53E-06 | 3.94E-05 |
| 214399_s_at | KRT4              | 1.1  | 2.14 | 5.25E-06 | 1.08E-04 |
| 1562364_at  | GVINP1            | 1.1  | 2.14 | 1.12E-07 | 4.76E-06 |
| 205180_s_at | ADAM8             | 1.09 | 2.14 | 6.64E-08 | 3.18E-06 |
| 219666_at   | MS4A6A            | 1.09 | 2.13 | 5.29E-09 | 3.82E-07 |
| 205364_at   | ACOX2             | 1.09 | 2.13 | 2.93E-05 | 4.24E-04 |
| 213920_at   | CUX2              | 1.09 | 2.13 | 3.89E-04 | 3.13E-03 |
| 230391_at   | CD84              | 1.09 | 2.13 | 9.18E-08 | 4.08E-06 |

|              |           |      |      |          |          |
|--------------|-----------|------|------|----------|----------|
| 220485_s_at  | SIRPG     | 1.09 | 2.13 | 4.34E-07 | 1.42E-05 |
| 205030_at    | FABP7     | 1.09 | 2.13 | 1.38E-02 | 4.67E-02 |
| 207277_at    | CD209     | 1.09 | 2.13 | 1.71E-08 | 1.03E-06 |
| 220330_s_at  | SAMSN1    | 1.09 | 2.13 | 2.43E-05 | 3.66E-04 |
| 229151_at    | SLC14A1   | 1.09 | 2.13 | 7.00E-03 | 2.81E-02 |
| 223710_at    | CCL26     | 1.09 | 2.13 | 6.53E-05 | 7.85E-04 |
| 227266_s_at  | FYB       | 1.09 | 2.12 | 2.67E-09 | 2.15E-07 |
| 207957_s_at  | PRKCB     | 1.09 | 2.12 | 4.89E-07 | 1.57E-05 |
| 231124_x_at  | LY9       | 1.08 | 2.12 | 8.53E-07 | 2.46E-05 |
| 207981_s_at  | ESRRG     | 1.08 | 2.12 | 1.53E-05 | 2.53E-04 |
| 226136_at    | GLIPR1    | 1.08 | 2.12 | 3.12E-09 | 2.46E-07 |
| 204440_at    | CD83      | 1.08 | 2.12 | 8.25E-09 | 5.49E-07 |
| 210038_at    | PRKCQ     | 1.08 | 2.12 | 8.08E-05 | 9.32E-04 |
| 206914_at    | CRTAM     | 1.08 | 2.11 | 1.10E-07 | 4.70E-06 |
| 219385_at    | SLAMF8    | 1.08 | 2.11 | 3.43E-08 | 1.84E-06 |
| 219820_at    | SLC6A16   | 1.08 | 2.11 | 3.23E-07 | 1.12E-05 |
| 207651_at    | GPR171    | 1.07 | 2.1  | 4.68E-06 | 9.80E-05 |
| 1553081_at   | WFDC12    | 1.07 | 2.09 | 1.41E-03 | 8.44E-03 |
| 229510_at    | MS4A14    | 1.06 | 2.09 | 6.04E-07 | 1.87E-05 |
| 220358_at    | BATF3     | 1.06 | 2.09 | 1.83E-08 | 1.09E-06 |
| 205804_s_at  | TRAF3IP3  | 1.06 | 2.09 | 2.50E-06 | 5.89E-05 |
| 214081_at    | PLXDC1    | 1.06 | 2.08 | 2.83E-05 | 4.11E-04 |
| 230937_at    | LOC285835 | 1.06 | 2.08 | 1.14E-05 | 2.00E-04 |
| 1556472_s_at | SCML4     | 1.05 | 2.08 | 7.81E-07 | 2.30E-05 |
| 232081_at    | ABCG1     | 1.05 | 2.07 | 5.31E-09 | 3.82E-07 |
| 214913_at    | ADAMTS3   | 1.05 | 2.07 | 7.57E-08 | 3.52E-06 |
| 228943_at    | MAP6      | 1.05 | 2.07 | 1.23E-06 | 3.33E-05 |
| 227353_at    | TMC8      | 1.05 | 2.06 | 2.77E-07 | 9.85E-06 |
| 241981_at    | FAM20A    | 1.04 | 2.05 | 3.60E-06 | 7.94E-05 |
| 233052_at    | DNAH8     | 1.03 | 2.05 | 1.73E-04 | 1.68E-03 |
| 243585_at    | ATP13A5   | 1.03 | 2.05 | 3.03E-06 | 6.91E-05 |
| 206247_at    | MICB      | 1.03 | 2.04 | 2.69E-07 | 9.66E-06 |
| 230110_at    | MCOLN2    | 1.03 | 2.04 | 4.41E-06 | 9.37E-05 |
| 1564786_at   | LOC338667 | 1.03 | 2.04 | 1.15E-03 | 7.22E-03 |
| 229390_at    | FAM26F    | 1.03 | 2.04 | 7.53E-07 | 2.24E-05 |
| 206366_x_at  | XCL1      | 1.03 | 2.04 | 2.86E-07 | 1.01E-05 |
| 1553062_at   | MOGAT1    | 1.03 | 2.04 | 8.40E-05 | 9.62E-04 |
| 221978_at    | HLA-F     | 1.03 | 2.04 | 1.11E-09 | 1.06E-07 |
| 240197_at    | SYN2      | 1.02 | 2.03 | 4.60E-07 | 1.49E-05 |
| 1557474_at   | LOC284578 | 1.02 | 2.03 | 9.53E-06 | 1.73E-04 |
| 242488_at    | CHRM3     | 1.02 | 2.03 | 7.29E-04 | 5.07E-03 |
| 205269_at    | LCP2      | 1.02 | 2.03 | 6.27E-08 | 3.04E-06 |



|                  |                                           |       |      |          |          |
|------------------|-------------------------------------------|-------|------|----------|----------|
| 1559194_a_a<br>t | CLEC4GP1                                  | 1.02  | 2.03 | 4.11E-06 | 8.86E-05 |
| 242268_at        | CELF2                                     | 1.02  | 2.03 | 2.02E-07 | 7.65E-06 |
| 214203_s_at      | PRODH                                     | 1.02  | 2.03 | 1.42E-07 | 5.79E-06 |
| 213960_at        | NTRK3                                     | 1.02  | 2.02 | 5.19E-05 | 6.58E-04 |
| 230418_s_at      | GALNT16                                   | 1.02  | 2.02 | 6.98E-06 | 1.36E-04 |
| 219519_s_at      | SIGLEC1                                   | 1.02  | 2.02 | 2.85E-07 | 1.01E-05 |
| 227742_at        | CLIC6                                     | 1.01  | 2.02 | 1.91E-05 | 3.01E-04 |
| 204912_at        | IL10RA                                    | 1.01  | 2.02 | 8.42E-12 | 1.86E-09 |
| 1560396_at       | KLHL6                                     | 1.01  | 2.02 | 2.70E-05 | 3.97E-04 |
| 228532_at        | C1orf162                                  | 1.01  | 2.02 | 1.76E-10 | 2.30E-08 |
| 227677_at        | JAK3                                      | 1.01  | 2.01 | 3.81E-07 | 1.27E-05 |
| 208161_s_at      | ABCC3                                     | 1.01  | 2.01 | 3.16E-10 | 3.72E-08 |
| 223343_at        | MS4A7                                     | 1     | 2    | 1.72E-05 | 2.79E-04 |
| 209879_at        | SELPLG                                    | 0.999 | 2    | 8.94E-09 | 5.85E-07 |
| 210184_at        | ITGAX                                     | 0.998 | 2    | 1.95E-07 | 7.46E-06 |
| 231029_at        | F5                                        | 0.995 | 1.99 | 7.31E-04 | 5.08E-03 |
| 202953_at        | C1QB                                      | 0.994 | 1.99 | 4.46E-11 | 7.49E-09 |
| 209969_s_at      | STAT1                                     | 0.991 | 1.99 | 5.19E-07 | 1.64E-05 |
| 205270_s_at      | LCP2                                      | 0.991 | 1.99 | 9.12E-09 | 5.95E-07 |
| 217087_at        | C1orf68                                   | 0.989 | 1.99 | 9.79E-04 | 6.41E-03 |
| 207802_at        | CRISP3                                    | 0.989 | 1.99 | 5.17E-03 | 2.24E-02 |
| 205786_s_at      | ITGAM                                     | 0.989 | 1.99 | 2.16E-07 | 8.07E-06 |
| 229241_at        | LDHD                                      | 0.989 | 1.99 | 2.90E-05 | 4.20E-04 |
| 220560_at        | C11orf21                                  | 0.989 | 1.98 | 3.29E-07 | 1.14E-05 |
| 209498_at        | CEACAM1                                   | 0.988 | 1.98 | 8.73E-06 | 1.62E-04 |
| 244363_at        | ROS1                                      | 0.986 | 1.98 | 2.98E-04 | 2.56E-03 |
| 211991_s_at      | HLA-DPA1                                  | 0.985 | 1.98 | 4.04E-10 | 4.63E-08 |
| 206785_s_at      | KLRC1 /// KLRC2                           | 0.985 | 1.98 | 1.94E-07 | 7.43E-06 |
| 1566671_a_a<br>t | PDXK                                      | 0.984 | 1.98 | 2.35E-04 | 2.13E-03 |
| 204279_at        | PSMB9                                     | 0.984 | 1.98 | 1.54E-09 | 1.36E-07 |
| 230550_at        | MS4A6A                                    | 0.984 | 1.98 | 4.71E-07 | 1.52E-05 |
| 205979_at        | SCGB2A1                                   | 0.983 | 1.98 | 1.30E-02 | 4.47E-02 |
| 205291_at        | IL2RB                                     | 0.982 | 1.98 | 8.56E-07 | 2.47E-05 |
| 227142_at        | PLEKHG5                                   | 0.981 | 1.97 | 2.36E-06 | 5.61E-05 |
| 204411_at        | KIF21B                                    | 0.981 | 1.97 | 1.04E-05 | 1.86E-04 |
| 204994_at        | MX2                                       | 0.98  | 1.97 | 3.17E-08 | 1.73E-06 |
| 208438_s_at      | FGR                                       | 0.98  | 1.97 | 5.93E-09 | 4.17E-07 |
| 212671_s_at      | HLA-DQA1 /// HLA-DQA2 ///<br>LOC100509457 | 0.98  | 1.97 | 7.94E-05 | 9.20E-04 |
| 229499_at        | CAPN13                                    | 0.98  | 1.97 | 4.26E-04 | 3.36E-03 |
| 207908_at        | KRT2                                      | 0.978 | 1.97 | 3.66E-06 | 8.05E-05 |
| 204959_at        | MNDA                                      | 0.978 | 1.97 | 2.37E-07 | 8.67E-06 |
| 239427_at        | SLAMF1                                    | 0.977 | 1.97 | 1.72E-07 | 6.70E-06 |

|             |                                                             |       |      |          |          |
|-------------|-------------------------------------------------------------|-------|------|----------|----------|
| 244572_at   | KY                                                          | 0.976 | 1.97 | 5.04E-07 | 1.60E-05 |
| 226142_at   | GLIPR1                                                      | 0.973 | 1.96 | 5.00E-09 | 3.64E-07 |
| 209734_at   | NCKAP1L                                                     | 0.973 | 1.96 | 3.44E-11 | 5.97E-09 |
| 218795_at   | ACP6                                                        | 0.964 | 1.95 | 3.55E-07 | 1.20E-05 |
| 214873_at   | LRP5L                                                       | 0.964 | 1.95 | 1.54E-04 | 1.53E-03 |
| 235291_s_at | FLJ32255                                                    | 0.963 | 1.95 | 6.61E-06 | 1.29E-04 |
| 209975_at   | CYP2E1                                                      | 0.962 | 1.95 | 8.47E-08 | 3.84E-06 |
| 204377_s_at | VPRBP                                                       | 0.962 | 1.95 | 1.51E-06 | 3.89E-05 |
| 220801_s_at | HAO2                                                        | 0.96  | 1.94 | 9.49E-04 | 6.26E-03 |
| 207861_at   | CCL22                                                       | 0.958 | 1.94 | 4.93E-06 | 1.03E-04 |
| 202524_s_at | SPOCK2                                                      | 0.958 | 1.94 | 4.10E-06 | 8.85E-05 |
| 232428_at   | MOGAT2                                                      | 0.957 | 1.94 | 2.66E-04 | 2.35E-03 |
| 204777_s_at | MAL                                                         | 0.957 | 1.94 | 1.71E-06 | 4.32E-05 |
| 214945_at   | FAM153A /// FAM153B ///<br>FAM153C /// LOC100507387         | 0.957 | 1.94 | 1.10E-03 | 6.96E-03 |
| 206069_s_at | ACADL                                                       | 0.956 | 1.94 | 1.36E-04 | 1.39E-03 |
| 205101_at   | CIITA                                                       | 0.955 | 1.94 | 7.33E-09 | 5.01E-07 |
| 210889_s_at | FCGR2B                                                      | 0.954 | 1.94 | 6.79E-10 | 7.02E-08 |
| 215133_s_at | FAM153A /// FAM153B ///<br>LOC100507387 ///<br>LOC100507427 | 0.953 | 1.94 | 2.52E-04 | 2.25E-03 |
| 219045_at   | RHOF                                                        | 0.952 | 1.94 | 9.58E-11 | 1.43E-08 |
| 206513_at   | AIM2                                                        | 0.952 | 1.93 | 9.37E-06 | 1.71E-04 |
| 208885_at   | LCP1                                                        | 0.951 | 1.93 | 4.28E-09 | 3.20E-07 |
| 235276_at   | EPSTI1                                                      | 0.946 | 1.93 | 5.74E-07 | 1.79E-05 |
| 236270_at   | NFATC4                                                      | 0.945 | 1.93 | 1.88E-07 | 7.25E-06 |
| 205280_at   | GLRB                                                        | 0.943 | 1.92 | 7.39E-07 | 2.21E-05 |
| 228573_at   | ANTXR2                                                      | 0.942 | 1.92 | 2.00E-06 | 4.90E-05 |
| 229723_at   | TAGAP                                                       | 0.942 | 1.92 | 1.90E-05 | 3.00E-04 |
| 202957_at   | HCLS1                                                       | 0.942 | 1.92 | 1.58E-08 | 9.50E-07 |
| 232581_x_at | HIVEP3                                                      | 0.94  | 1.92 | 2.67E-05 | 3.93E-04 |
| 206978_at   | CCR2                                                        | 0.939 | 1.92 | 5.73E-06 | 1.15E-04 |
| 241418_at   | LOC344887                                                   | 0.939 | 1.92 | 3.88E-04 | 3.13E-03 |
| 207710_at   | LCE2B                                                       | 0.936 | 1.91 | 1.15E-04 | 1.22E-03 |
| 215784_at   | CD1E                                                        | 0.933 | 1.91 | 7.63E-05 | 8.93E-04 |
| 206214_at   | PLA2G7                                                      | 0.931 | 1.91 | 1.44E-05 | 2.42E-04 |
| 212975_at   | DENND3                                                      | 0.931 | 1.91 | 3.06E-06 | 6.95E-05 |
| 228836_at   | SLC25A35                                                    | 0.93  | 1.91 | 5.86E-05 | 7.21E-04 |
| 228298_at   | PCED1B                                                      | 0.929 | 1.9  | 6.12E-06 | 1.21E-04 |
| 206143_at   | SLC26A3                                                     | 0.928 | 1.9  | 1.41E-03 | 8.45E-03 |
| 206181_at   | SLAMF1                                                      | 0.928 | 1.9  | 3.59E-07 | 1.21E-05 |
| 227168_at   | MIAT                                                        | 0.927 | 1.9  | 4.33E-07 | 1.42E-05 |
| 223605_at   | SLC25A18                                                    | 0.926 | 1.9  | 4.14E-04 | 3.28E-03 |
| 201884_at   | CEACAM5                                                     | 0.925 | 1.9  | 7.40E-05 | 8.69E-04 |

|                  |                |       |      |          |          |
|------------------|----------------|-------|------|----------|----------|
| 235175_at        | GBP4           | 0.923 | 1.9  | 3.65E-07 | 1.23E-05 |
| 204122_at        | TYROBP         | 0.922 | 1.89 | 6.45E-09 | 4.48E-07 |
| 236081_at        | SNCA           | 0.921 | 1.89 | 1.80E-05 | 2.87E-04 |
| 227210_at        | SFMBT2         | 0.921 | 1.89 | 1.31E-08 | 8.18E-07 |
| 219452_at        | DPEP2          | 0.916 | 1.89 | 2.65E-07 | 9.55E-06 |
| 230560_at        | STXBP6         | 0.911 | 1.88 | 1.84E-06 | 4.56E-05 |
| 204160_s_at      | ENPP4          | 0.91  | 1.88 | 2.37E-05 | 3.59E-04 |
| 229634_at        | TMEM139        | 0.91  | 1.88 | 1.04E-05 | 1.87E-04 |
| 214012_at        | ERAP1          | 0.909 | 1.88 | 1.67E-04 | 1.63E-03 |
| 223562_at        | PARVG          | 0.909 | 1.88 | 8.36E-08 | 3.80E-06 |
| 226603_at        | SAMD9L         | 0.908 | 1.88 | 1.54E-07 | 6.11E-06 |
| 229534_at        | ACOT4          | 0.907 | 1.87 | 3.72E-06 | 8.17E-05 |
| 31637_s_at       | NR1D1 /// THRA | 0.905 | 1.87 | 8.14E-06 | 1.53E-04 |
| 212873_at        | HMHA1          | 0.905 | 1.87 | 5.93E-08 | 2.91E-06 |
| 211200_s_at      | EFCAB2         | 0.903 | 1.87 | 6.87E-04 | 4.83E-03 |
| 214044_at        | RYR2           | 0.902 | 1.87 | 1.18E-05 | 2.05E-04 |
| 205686_s_at      | CD86           | 0.902 | 1.87 | 1.57E-10 | 2.09E-08 |
| 218627_at        | DRAM1          | 0.9   | 1.87 | 2.04E-08 | 1.19E-06 |
| 219319_at        | HIF3A          | 0.899 | 1.86 | 1.02E-05 | 1.83E-04 |
| 219594_at        | NINJ2          | 0.899 | 1.86 | 1.10E-09 | 1.06E-07 |
| 1554360_at       | FCHSD2         | 0.897 | 1.86 | 3.05E-05 | 4.36E-04 |
| 210607_at        | FLT3LG         | 0.897 | 1.86 | 7.44E-08 | 3.49E-06 |
| 212613_at        | BTN3A2         | 0.895 | 1.86 | 7.95E-06 | 1.50E-04 |
| 224451_x_at      | ARHGAP9        | 0.895 | 1.86 | 1.05E-06 | 2.92E-05 |
| 207466_at        | GAL            | 0.894 | 1.86 | 1.32E-03 | 8.03E-03 |
| 206118_at        | STAT4          | 0.892 | 1.86 | 4.12E-06 | 8.89E-05 |
| 217478_s_at      | HLA-DMA        | 0.89  | 1.85 | 1.29E-11 | 2.63E-09 |
| 205098_at        | CCR1           | 0.889 | 1.85 | 3.81E-08 | 2.00E-06 |
| 220577_at        | GVINP1         | 0.889 | 1.85 | 6.62E-07 | 2.01E-05 |
| 205295_at        | CKMT2          | 0.888 | 1.85 | 1.05E-06 | 2.92E-05 |
| 205432_at        | OVGP1          | 0.887 | 1.85 | 1.07E-06 | 2.96E-05 |
| 210163_at        | CXCL11         | 0.885 | 1.85 | 2.29E-04 | 2.09E-03 |
| 1556474_a_a<br>t | FLJ38379       | 0.884 | 1.85 | 5.80E-06 | 1.16E-04 |
| 227609_at        | EPSTI1         | 0.884 | 1.85 | 1.70E-04 | 1.65E-03 |
| 229597_s_at      | WDFY4          | 0.88  | 1.84 | 3.34E-07 | 1.15E-05 |
| 207430_s_at      | MSMB           | 0.879 | 1.84 | 2.65E-03 | 1.36E-02 |
| 204760_s_at      | NR1D1 /// THRA | 0.877 | 1.84 | 4.49E-05 | 5.85E-04 |
| 219616_at        | ACSS3          | 0.877 | 1.84 | 9.28E-07 | 2.64E-05 |
| 228057_at        | DDIT4L         | 0.876 | 1.84 | 1.50E-05 | 2.50E-04 |
| 203892_at        | WFDC2          | 0.876 | 1.84 | 6.60E-06 | 1.29E-04 |
| 206623_at        | PDE6A          | 0.875 | 1.83 | 4.30E-04 | 3.38E-03 |
| 244385_at        | KDM4C          | 0.875 | 1.83 | 8.88E-06 | 1.64E-04 |

|              |                                       |       |      |          |          |
|--------------|---------------------------------------|-------|------|----------|----------|
| 236331_at    | CDKL2                                 | 0.874 | 1.83 | 5.60E-04 | 4.13E-03 |
| 210538_s_at  | BIRC3                                 | 0.874 | 1.83 | 4.71E-05 | 6.07E-04 |
| 204197_s_at  | RUNX3                                 | 0.873 | 1.83 | 3.46E-11 | 5.97E-09 |
| 1561306_s_at | STRC                                  | 0.869 | 1.83 | 7.75E-05 | 9.03E-04 |
| 203485_at    | RTN1                                  | 0.869 | 1.83 | 3.12E-06 | 7.06E-05 |
| 205768_s_at  | SLC27A2                               | 0.869 | 1.83 | 3.09E-04 | 2.63E-03 |
| 210439_at    | ICOS                                  | 0.868 | 1.83 | 2.89E-05 | 4.19E-04 |
| 211734_s_at  | FCER1A                                | 0.868 | 1.82 | 8.20E-09 | 5.47E-07 |
| 230422_at    | FPR3                                  | 0.868 | 1.82 | 6.40E-06 | 1.26E-04 |
| 213830_at    | YME1L1                                | 0.867 | 1.82 | 1.81E-03 | 1.01E-02 |
| 235486_at    | KIAA1549L                             | 0.865 | 1.82 | 2.70E-05 | 3.97E-04 |
| 206199_at    | CEACAM7                               | 0.865 | 1.82 | 1.40E-03 | 8.41E-03 |
| 204153_s_at  | MFNG                                  | 0.864 | 1.82 | 9.19E-08 | 4.08E-06 |
| 209905_at    | HOXA10-HOXA9 /// HOXA9 ///<br>MIR196B | 0.858 | 1.81 | 4.04E-06 | 8.75E-05 |
| 220780_at    | PLA2G3                                | 0.857 | 1.81 | 1.93E-05 | 3.03E-04 |
| 244598_at    | LCP2                                  | 0.854 | 1.81 | 8.64E-07 | 2.49E-05 |
| 210026_s_at  | CARD10                                | 0.854 | 1.81 | 9.23E-06 | 1.69E-04 |
| 229497_at    | ANKDD1A                               | 0.853 | 1.81 | 1.65E-09 | 1.43E-07 |
| 231930_at    | ELMOD1 /// LOC643923                  | 0.853 | 1.81 | 5.43E-05 | 6.81E-04 |
| 208396_s_at  | PDE1A                                 | 0.853 | 1.81 | 1.09E-05 | 1.93E-04 |
| 203828_s_at  | IL32                                  | 0.853 | 1.81 | 2.24E-07 | 8.31E-06 |
| 244033_at    | CEP128                                | 0.851 | 1.8  | 6.60E-07 | 2.00E-05 |
| 212587_s_at  | PTPRC                                 | 0.851 | 1.8  | 7.90E-06 | 1.50E-04 |
| 230025_at    | GJD3                                  | 0.85  | 1.8  | 5.03E-07 | 1.60E-05 |
| 226474_at    | NLRC5                                 | 0.85  | 1.8  | 9.72E-08 | 4.27E-06 |
| 205213_at    | ACAP1                                 | 0.848 | 1.8  | 4.00E-08 | 2.08E-06 |
| 231093_at    | FCRL3                                 | 0.848 | 1.8  | 1.18E-04 | 1.24E-03 |
| 226878_at    | HLA-DOA                               | 0.848 | 1.8  | 1.19E-06 | 3.23E-05 |
| 202531_at    | IRF1                                  | 0.848 | 1.8  | 2.00E-07 | 7.63E-06 |
| 230773_at    | ZNF385D                               | 0.846 | 1.8  | 3.17E-05 | 4.49E-04 |
| 207955_at    | CCL27                                 | 0.845 | 1.8  | 3.44E-04 | 2.85E-03 |
| 235343_at    | VASH2                                 | 0.845 | 1.8  | 4.16E-06 | 8.93E-05 |
| 216701_at    | C1orf68                               | 0.844 | 1.79 | 1.65E-03 | 9.48E-03 |
| 209795_at    | CD69                                  | 0.844 | 1.79 | 6.11E-03 | 2.54E-02 |
| 204259_at    | MMP7                                  | 0.844 | 1.79 | 1.86E-06 | 4.60E-05 |
| 205456_at    | CD3E                                  | 0.842 | 1.79 | 1.64E-07 | 6.44E-06 |
| 208121_s_at  | PTPRO                                 | 0.842 | 1.79 | 5.27E-08 | 2.64E-06 |
| 226311_at    | ADAMTS2                               | 0.841 | 1.79 | 4.34E-05 | 5.70E-04 |
| 236234_at    | PDE1A                                 | 0.841 | 1.79 | 4.00E-06 | 8.67E-05 |
| 220003_at    | LRRC36                                | 0.84  | 1.79 | 8.99E-05 | 1.01E-03 |
| 207901_at    | IL12B                                 | 0.84  | 1.79 | 5.74E-05 | 7.10E-04 |
| 1553311_at   | C20orf197                             | 0.839 | 1.79 | 6.47E-07 | 1.98E-05 |

|                  |                       |       |      |          |          |
|------------------|-----------------------|-------|------|----------|----------|
| 226818_at        | MPEG1                 | 0.838 | 1.79 | 8.14E-09 | 5.45E-07 |
| 205997_at        | ADAM28                | 0.837 | 1.79 | 8.85E-08 | 3.97E-06 |
| 41577_at         | PPP1R16B              | 0.837 | 1.79 | 1.13E-06 | 3.12E-05 |
| 215116_s_at      | DNM1                  | 0.837 | 1.79 | 7.30E-07 | 2.18E-05 |
| 1294_at          | MIR5193 /// UBA7      | 0.836 | 1.79 | 4.70E-08 | 2.38E-06 |
| 208146_s_at      | CPVL                  | 0.836 | 1.78 | 1.35E-07 | 5.54E-06 |
| 210619_s_at      | HYAL1                 | 0.834 | 1.78 | 5.15E-04 | 3.86E-03 |
| 213723_s_at      | IDUA                  | 0.834 | 1.78 | 9.34E-05 | 1.04E-03 |
| 226248_s_at      | KIAA1324              | 0.833 | 1.78 | 1.19E-04 | 1.25E-03 |
| 230799_at        | LOC100134259          | 0.832 | 1.78 | 3.30E-05 | 4.62E-04 |
| 231015_at        | KLF15                 | 0.831 | 1.78 | 2.82E-06 | 6.48E-05 |
| 229354_at        | AHRR                  | 0.83  | 1.78 | 1.93E-05 | 3.04E-04 |
| 213888_s_at      | TRAF3IP3              | 0.83  | 1.78 | 2.60E-05 | 3.85E-04 |
| 219992_at        | TAC3                  | 0.829 | 1.78 | 4.71E-04 | 3.62E-03 |
| 1552398_a_a<br>t | CLEC12A               | 0.829 | 1.78 | 9.88E-05 | 1.08E-03 |
| 241440_at        | ZIC1                  | 0.828 | 1.78 | 2.54E-04 | 2.26E-03 |
| 1561394_s_a<br>t | KIAA1755              | 0.827 | 1.77 | 2.32E-05 | 3.53E-04 |
| 235719_at        | CYP4V2                | 0.827 | 1.77 | 2.23E-04 | 2.05E-03 |
| 209901_x_at      | AIF1                  | 0.827 | 1.77 | 3.04E-08 | 1.68E-06 |
| 242286_at        | GRIN2A                | 0.827 | 1.77 | 7.87E-07 | 2.32E-05 |
| 1564475_s_a<br>t | ZBED3-AS1             | 0.825 | 1.77 | 6.77E-04 | 4.77E-03 |
| 226612_at        | UBE2QL1               | 0.825 | 1.77 | 1.20E-07 | 5.06E-06 |
| 213845_at        | GRIK2                 | 0.824 | 1.77 | 2.43E-04 | 2.19E-03 |
| 204663_at        | ME3                   | 0.824 | 1.77 | 6.79E-06 | 1.32E-04 |
| 223691_at        | RGS22                 | 0.824 | 1.77 | 6.86E-05 | 8.19E-04 |
| 237870_at        | NQO2                  | 0.823 | 1.77 | 7.25E-04 | 5.05E-03 |
| 235574_at        | GBP4                  | 0.823 | 1.77 | 4.61E-07 | 1.50E-05 |
| 205859_at        | LY86                  | 0.823 | 1.77 | 1.72E-06 | 4.32E-05 |
| 215332_s_at      | CD8B /// LOC100996919 | 0.823 | 1.77 | 1.27E-08 | 8.00E-07 |
| 220783_at        | MMP27                 | 0.82  | 1.77 | 6.14E-06 | 1.22E-04 |
| 233907_s_at      | SERTAD4               | 0.82  | 1.77 | 2.55E-06 | 5.97E-05 |
| 208964_s_at      | FADS1 /// MIR1908     | 0.819 | 1.76 | 3.32E-03 | 1.61E-02 |
| 225598_at        | SLC45A4               | 0.819 | 1.76 | 1.23E-06 | 3.31E-05 |
| 238039_at        | LOC728769             | 0.818 | 1.76 | 1.12E-07 | 4.77E-06 |
| 209785_s_at      | PLA2G4C               | 0.818 | 1.76 | 4.95E-05 | 6.32E-04 |
| 239237_at        | LOC100506776          | 0.817 | 1.76 | 1.28E-04 | 1.33E-03 |
| 207072_at        | IL18RAP               | 0.816 | 1.76 | 2.18E-05 | 3.35E-04 |
| 206186_at        | MPP3                  | 0.815 | 1.76 | 4.95E-06 | 1.03E-04 |
| 228258_at        | TBC1D10C              | 0.813 | 1.76 | 1.25E-07 | 5.20E-06 |
| 239787_at        | KCTD4                 | 0.812 | 1.76 | 3.48E-03 | 1.67E-02 |
| 223280_x_at      | MS4A6A                | 0.812 | 1.76 | 8.71E-08 | 3.93E-06 |
| 226436_at        | RASSF4                | 0.812 | 1.76 | 2.46E-07 | 8.91E-06 |

|                  |                     |       |      |          |          |
|------------------|---------------------|-------|------|----------|----------|
| 213603_s_at      | RAC2                | 0.811 | 1.75 | 2.12E-08 | 1.23E-06 |
| 238983_at        | NSUN7               | 0.81  | 1.75 | 1.95E-04 | 1.85E-03 |
| 227183_at        | MIR143HG /// MIR145 | 0.81  | 1.75 | 1.06E-03 | 6.81E-03 |
| 238229_at        | TMEM67              | 0.81  | 1.75 | 6.94E-04 | 4.87E-03 |
| 212444_at        | GPRC5A              | 0.809 | 1.75 | 7.73E-05 | 9.01E-04 |
| 228821_at        | ST6GAL2             | 0.808 | 1.75 | 2.05E-04 | 1.92E-03 |
| 229088_at        | ENPP1               | 0.807 | 1.75 | 1.19E-05 | 2.07E-04 |
| 227647_at        | KCNE3               | 0.807 | 1.75 | 1.00E-04 | 1.09E-03 |
| 205769_at        | SLC27A2             | 0.806 | 1.75 | 8.07E-04 | 5.48E-03 |
| 210665_at        | TFPI                | 0.806 | 1.75 | 2.02E-07 | 7.65E-06 |
| 231549_at        | C1orf158            | 0.805 | 1.75 | 1.26E-02 | 4.35E-02 |
| 236995_x_at      | TFEC                | 0.805 | 1.75 | 1.53E-07 | 6.11E-06 |
| 205992_s_at      | IL15                | 0.805 | 1.75 | 3.40E-08 | 1.83E-06 |
| 244297_at        | ANKRD18A            | 0.804 | 1.75 | 2.23E-04 | 2.05E-03 |
| 243601_at        | LOC285957           | 0.803 | 1.74 | 7.67E-08 | 3.55E-06 |
| 219704_at        | YBX2                | 0.803 | 1.74 | 1.31E-04 | 1.35E-03 |
| 232311_at        | B2M                 | 0.801 | 1.74 | 1.24E-07 | 5.16E-06 |
| 224356_x_at      | MS4A6A              | 0.8   | 1.74 | 9.48E-08 | 4.18E-06 |
| 211138_s_at      | KMO                 | 0.799 | 1.74 | 6.03E-08 | 2.95E-06 |
| 209488_s_at      | RBPM5               | 0.799 | 1.74 | 3.45E-05 | 4.79E-04 |
| 212970_at        | APBB2               | 0.799 | 1.74 | 1.74E-06 | 4.36E-05 |
| 222088_s_at      | SLC2A14 /// SLC2A3  | 0.797 | 1.74 | 4.45E-05 | 5.80E-04 |
| 236253_at        | ZNF546              | 0.797 | 1.74 | 3.11E-06 | 7.04E-05 |
| 203895_at        | PLCB4               | 0.797 | 1.74 | 1.60E-04 | 1.58E-03 |
| 214981_at        | POSTN               | 0.795 | 1.74 | 2.22E-06 | 5.32E-05 |
| 236886_at        | LOC100049716        | 0.795 | 1.73 | 2.68E-05 | 3.94E-04 |
| 204114_at        | NID2                | 0.794 | 1.73 | 7.70E-06 | 1.47E-04 |
| 236150_at        | HYKK                | 0.794 | 1.73 | 6.48E-06 | 1.27E-04 |
| 224357_s_at      | MS4A4A              | 0.793 | 1.73 | 3.55E-07 | 1.20E-05 |
| 1568794_at       | LOC643355           | 0.793 | 1.73 | 1.24E-04 | 1.30E-03 |
| 229619_at        | FOLR2               | 0.792 | 1.73 | 4.44E-06 | 9.40E-05 |
| 1554906_a_a<br>t | MPHOSPH6            | 0.792 | 1.73 | 4.18E-04 | 3.31E-03 |
| 235742_at        | RHOC                | 0.791 | 1.73 | 3.48E-08 | 1.86E-06 |
| 221142_s_at      | PECR                | 0.791 | 1.73 | 2.08E-03 | 1.13E-02 |
| 228342_s_at      | ALPK3               | 0.791 | 1.73 | 3.30E-03 | 1.60E-02 |
| 206932_at        | CH25H               | 0.79  | 1.73 | 1.01E-04 | 1.10E-03 |
| 235533_at        | COX19               | 0.789 | 1.73 | 9.11E-05 | 1.02E-03 |
| 219183_s_at      | CYTH4               | 0.789 | 1.73 | 1.38E-06 | 3.64E-05 |
| 234722_x_at      | OBP2B               | 0.788 | 1.73 | 1.78E-04 | 1.72E-03 |
| 232617_at        | CTSS                | 0.788 | 1.73 | 1.81E-07 | 6.99E-06 |
| 201743_at        | CD14                | 0.788 | 1.73 | 8.99E-08 | 4.02E-06 |
| 230782_at        | SORD                | 0.788 | 1.73 | 4.02E-08 | 2.09E-06 |

|              |                    |       |      |          |          |
|--------------|--------------------|-------|------|----------|----------|
| 1553772_at   | GK5                | 0.786 | 1.72 | 2.65E-06 | 6.16E-05 |
| 220428_at    | CD207              | 0.786 | 1.72 | 1.21E-05 | 2.11E-04 |
| 239272_at    | MMP28              | 0.786 | 1.72 | 9.37E-05 | 1.04E-03 |
| 239380_at    | C5orf27            | 0.785 | 1.72 | 7.77E-05 | 9.05E-04 |
| 235557_at    | GPAT2              | 0.785 | 1.72 | 4.52E-04 | 3.52E-03 |
| 204939_s_at  | PLN                | 0.784 | 1.72 | 1.31E-02 | 4.49E-02 |
| 204502_at    | SAMHD1             | 0.783 | 1.72 | 3.46E-08 | 1.85E-06 |
| 1560531_at   | LCE1B              | 0.783 | 1.72 | 3.02E-06 | 6.90E-05 |
| 201506_at    | TGFBI              | 0.783 | 1.72 | 1.84E-08 | 1.09E-06 |
| 1556427_s_at | LRRN4CL            | 0.782 | 1.72 | 3.09E-04 | 2.62E-03 |
| 230962_at    | DCLK1              | 0.782 | 1.72 | 2.28E-04 | 2.08E-03 |
| 214087_s_at  | MYBPC1             | 0.782 | 1.72 | 5.05E-04 | 3.81E-03 |
| 209842_at    | SOX10              | 0.782 | 1.72 | 2.56E-05 | 3.80E-04 |
| 214596_at    | CHRM3              | 0.782 | 1.72 | 2.52E-03 | 1.31E-02 |
| 203498_at    | RCAN2              | 0.781 | 1.72 | 1.97E-06 | 4.82E-05 |
| 203104_at    | CSF1R              | 0.781 | 1.72 | 8.37E-10 | 8.40E-08 |
| 204852_s_at  | PTPN7              | 0.781 | 1.72 | 1.60E-07 | 6.30E-06 |
| 225701_at    | AKNA               | 0.781 | 1.72 | 8.74E-09 | 5.73E-07 |
| 220559_at    | EN1                | 0.781 | 1.72 | 5.68E-07 | 1.77E-05 |
| 206625_at    | PRPH2              | 0.78  | 1.72 | 1.36E-04 | 1.39E-03 |
| 241739_at    | OGFOD1             | 0.78  | 1.72 | 2.49E-04 | 2.22E-03 |
| 244276_at    | KLB                | 0.78  | 1.72 | 1.11E-04 | 1.18E-03 |
| 1556096_s_at | UNC13C             | 0.778 | 1.72 | 1.63E-03 | 9.42E-03 |
| 225491_at    | SLC1A2             | 0.778 | 1.72 | 3.41E-05 | 4.74E-04 |
| 1556839_s_at | LOC100289090       | 0.778 | 1.72 | 1.53E-03 | 8.95E-03 |
| 205599_at    | TRAF1              | 0.777 | 1.71 | 7.64E-07 | 2.26E-05 |
| 232737_s_at  | ENPP3              | 0.775 | 1.71 | 3.26E-04 | 2.73E-03 |
| 204424_s_at  | LMO3               | 0.775 | 1.71 | 3.82E-03 | 1.79E-02 |
| 204919_at    | PRH1-PRR4 /// PRR4 | 0.775 | 1.71 | 1.67E-03 | 9.57E-03 |
| 219716_at    | APOL6              | 0.775 | 1.71 | 2.15E-07 | 8.04E-06 |
| 231773_at    | ANGPTL1            | 0.775 | 1.71 | 5.05E-06 | 1.05E-04 |
| 219574_at    | 1-Mar              | 0.774 | 1.71 | 1.75E-07 | 6.78E-06 |
| 1557558_s_at | MATN1-AS1          | 0.774 | 1.71 | 3.14E-06 | 7.08E-05 |
| 234787_at    | DKFZp564H213       | 0.773 | 1.71 | 5.85E-06 | 1.17E-04 |
| 236261_at    | OSBPL6             | 0.771 | 1.71 | 1.27E-05 | 2.18E-04 |
| 204575_s_at  | MMP19              | 0.771 | 1.71 | 8.50E-07 | 2.46E-05 |
| 211005_at    | LAT                | 0.771 | 1.71 | 8.77E-07 | 2.51E-05 |
| 229254_at    | MFSD4              | 0.771 | 1.71 | 2.93E-04 | 2.53E-03 |
| 209994_s_at  | ABCB1 /// ABCB4    | 0.77  | 1.71 | 2.75E-06 | 6.36E-05 |
| 206601_s_at  | HOXD3              | 0.77  | 1.7  | 9.67E-06 | 1.75E-04 |
| 243526_at    | WDR86              | 0.769 | 1.7  | 1.36E-03 | 8.24E-03 |
| 205403_at    | IL1R2              | 0.769 | 1.7  | 3.18E-08 | 1.73E-06 |

|             |                                                                                     |       |      |          |          |
|-------------|-------------------------------------------------------------------------------------|-------|------|----------|----------|
| 213418_at   | HSPA6                                                                               | 0.768 | 1.7  | 5.65E-06 | 1.14E-04 |
| 236064_at   | SLC25A35                                                                            | 0.767 | 1.7  | 2.74E-04 | 2.40E-03 |
| 218345_at   | TMEM176A                                                                            | 0.767 | 1.7  | 9.63E-06 | 1.75E-04 |
| 236539_at   | PTPN22                                                                              | 0.767 | 1.7  | 2.12E-06 | 5.14E-05 |
| 1563369_at  | LINC00173                                                                           | 0.766 | 1.7  | 1.14E-04 | 1.21E-03 |
| 211742_s_at | EVI2B                                                                               | 0.766 | 1.7  | 6.96E-07 | 2.10E-05 |
| 209827_s_at | IL16                                                                                | 0.766 | 1.7  | 6.11E-07 | 1.89E-05 |
| 213095_x_at | AIF1                                                                                | 0.765 | 1.7  | 3.17E-08 | 1.73E-06 |
| 203547_at   | CD4                                                                                 | 0.765 | 1.7  | 3.21E-10 | 3.77E-08 |
| 204519_s_at | PLL2                                                                                | 0.765 | 1.7  | 2.63E-04 | 2.32E-03 |
| 235418_at   | FAHD2A                                                                              | 0.764 | 1.7  | 9.15E-06 | 1.68E-04 |
| 230925_at   | APBB1IP                                                                             | 0.764 | 1.7  | 7.66E-04 | 5.26E-03 |
| 229430_at   | C8orf46                                                                             | 0.764 | 1.7  | 2.97E-05 | 4.28E-04 |
| 223655_at   | CD163L1                                                                             | 0.763 | 1.7  | 1.25E-10 | 1.76E-08 |
| 207757_at   | ZFP2                                                                                | 0.762 | 1.7  | 4.36E-06 | 9.28E-05 |
| 1564276_at  | C5orf56                                                                             | 0.762 | 1.7  | 1.25E-06 | 3.36E-05 |
| 239183_at   | ANGPTL1                                                                             | 0.761 | 1.69 | 4.42E-07 | 1.44E-05 |
| 1555890_at  | OR2A20P /// OR2A9P<br>HLA-DRB1 /// HLA-DRB4 ///<br>LOC100507709 ///<br>LOC100507714 | 0.761 | 1.69 | 3.34E-04 | 2.78E-03 |
| 204670_x_at | LOC100507714                                                                        | 0.76  | 1.69 | 6.92E-08 | 3.29E-06 |
| 230563_at   | RASGEF1A                                                                            | 0.76  | 1.69 | 2.31E-04 | 2.10E-03 |
| 212588_at   | PTPRC                                                                               | 0.759 | 1.69 | 1.18E-06 | 3.22E-05 |
| 232543_x_at | ARHGAP9                                                                             | 0.757 | 1.69 | 1.16E-06 | 3.18E-05 |
| 205691_at   | SYNGR3                                                                              | 0.757 | 1.69 | 1.88E-05 | 2.97E-04 |
| 210895_s_at | CD86                                                                                | 0.757 | 1.69 | 2.86E-08 | 1.60E-06 |
| 205059_s_at | IDUA                                                                                | 0.756 | 1.69 | 3.69E-05 | 5.03E-04 |
| 204501_at   | NOV                                                                                 | 0.755 | 1.69 | 4.06E-07 | 1.34E-05 |
| 206707_x_at | FAM65B                                                                              | 0.755 | 1.69 | 8.09E-08 | 3.72E-06 |
| 230388_s_at | KANSL1-AS1                                                                          | 0.754 | 1.69 | 3.55E-03 | 1.69E-02 |
| 229902_at   | FLT4                                                                                | 0.754 | 1.69 | 3.02E-05 | 4.33E-04 |
| 214243_s_at | SERHL /// SERHL2                                                                    | 0.754 | 1.69 | 1.23E-02 | 4.29E-02 |
| 205455_at   | MST1R                                                                               | 0.753 | 1.69 | 5.10E-05 | 6.49E-04 |
| 213849_s_at | PPP2R2B                                                                             | 0.753 | 1.69 | 3.83E-07 | 1.28E-05 |
| 242988_at   | DCST2                                                                               | 0.753 | 1.69 | 1.59E-05 | 2.62E-04 |
| 205299_s_at | BTN2A2                                                                              | 0.752 | 1.68 | 2.86E-05 | 4.15E-04 |
| 215051_x_at | AIF1                                                                                | 0.752 | 1.68 | 7.84E-09 | 5.28E-07 |
| 204352_at   | TRAF5                                                                               | 0.752 | 1.68 | 5.37E-07 | 1.69E-05 |
| 205067_at   | IL1B                                                                                | 0.752 | 1.68 | 2.88E-04 | 2.50E-03 |
| 206576_s_at | CEACAM1                                                                             | 0.751 | 1.68 | 1.14E-04 | 1.21E-03 |
| 214240_at   | GAL                                                                                 | 0.751 | 1.68 | 8.91E-03 | 3.35E-02 |
| 237291_at   | PRORS1P                                                                             | 0.751 | 1.68 | 1.33E-04 | 1.36E-03 |
| 207777_s_at | SP140                                                                               | 0.751 | 1.68 | 7.25E-07 | 2.17E-05 |
| 210385_s_at | ERAP1                                                                               | 0.75  | 1.68 | 1.35E-04 | 1.38E-03 |



|                                 |                                     |       |      |          |          |
|---------------------------------|-------------------------------------|-------|------|----------|----------|
| 205843_x_at                     | CRAT                                | 0.75  | 1.68 | 2.74E-03 | 1.40E-02 |
| 219999_at                       | MAN2A2                              | 0.749 | 1.68 | 4.89E-07 | 1.57E-05 |
| 204057_at                       | IRF8                                | 0.748 | 1.68 | 8.90E-05 | 1.00E-03 |
| 242557_at                       | ZNRD1-AS1                           | 0.747 | 1.68 | 8.33E-03 | 3.19E-02 |
| 230480_at                       | PIWIL4                              | 0.747 | 1.68 | 1.10E-05 | 1.94E-04 |
| 222134_at                       | DDO                                 | 0.747 | 1.68 | 1.32E-05 | 2.25E-04 |
| 211372_s_at                     | IL1R2                               | 0.746 | 1.68 | 7.23E-05 | 8.52E-04 |
| 228060_at                       | SLC35F1                             | 0.746 | 1.68 | 1.05E-04 | 1.14E-03 |
| 238575_at                       | OSBPL6                              | 0.746 | 1.68 | 1.28E-04 | 1.33E-03 |
| 1556666_a_a<br>t                | LOC101059957 /// TTC6               | 0.745 | 1.68 | 3.71E-03 | 1.75E-02 |
| 204774_at                       | EVI2A                               | 0.745 | 1.68 | 1.06E-05 | 1.88E-04 |
| 229800_at                       | DCLK1                               | 0.745 | 1.68 | 3.18E-05 | 4.50E-04 |
| 210140_at                       | CST7                                | 0.744 | 1.67 | 7.04E-04 | 4.93E-03 |
| 202307_s_at                     | TAP1                                | 0.743 | 1.67 | 1.95E-09 | 1.65E-07 |
| 203708_at                       | PDE4B                               | 0.743 | 1.67 | 1.02E-05 | 1.84E-04 |
| 214434_at                       | HSPA12A                             | 0.743 | 1.67 | 5.44E-06 | 1.11E-04 |
| 204614_at                       | SERPINB2                            | 0.743 | 1.67 | 4.33E-05 | 5.69E-04 |
| 204179_at                       | MB                                  | 0.743 | 1.67 | 9.48E-05 | 1.05E-03 |
| 210108_at                       | CACNA1D                             | 0.742 | 1.67 | 5.63E-05 | 7.02E-04 |
| 232234_at                       | SLA2                                | 0.742 | 1.67 | 1.62E-06 | 4.14E-05 |
| 228391_at                       | CYP4V2                              | 0.741 | 1.67 | 7.31E-05 | 8.60E-04 |
| 211990_at                       | HLA-DPA1                            | 0.74  | 1.67 | 1.50E-04 | 1.50E-03 |
| 59697_at                        | RAB15                               | 0.74  | 1.67 | 1.09E-06 | 3.02E-05 |
| 223122_s_at                     | SFRP2                               | 0.74  | 1.67 | 4.07E-03 | 1.87E-02 |
| 207623_at                       | ABCF2                               | 0.74  | 1.67 | 5.33E-06 | 1.09E-04 |
| 213752_at                       | KAZN                                | 0.739 | 1.67 | 2.51E-07 | 9.06E-06 |
| 228367_at                       | ALPK2                               | 0.739 | 1.67 | 5.13E-05 | 6.52E-04 |
| 1554406_a_a<br>t                | CLEC7A                              | 0.738 | 1.67 | 2.10E-04 | 1.95E-03 |
| 229400_at                       | HOXD10                              | 0.738 | 1.67 | 2.03E-04 | 1.91E-03 |
| 213369_at                       | CDHR1                               | 0.737 | 1.67 | 1.02E-02 | 3.73E-02 |
| 206104_at                       | ISL1                                | 0.737 | 1.67 | 4.64E-06 | 9.75E-05 |
| 210644_s_at                     | LAIR1                               | 0.737 | 1.67 | 3.10E-03 | 1.53E-02 |
| 1560697_at                      | TRHDE-AS1                           | 0.736 | 1.67 | 3.61E-04 | 2.95E-03 |
| 210380_s_at                     | CACNA1G                             | 0.736 | 1.67 | 3.03E-06 | 6.91E-05 |
| 220615_s_at                     | FAR2                                | 0.735 | 1.66 | 2.64E-03 | 1.36E-02 |
| 237974_at                       | ABHD12B /// MIR4454                 | 0.735 | 1.66 | 1.55E-08 | 9.38E-07 |
| 221087_s_at                     | APOL3<br>HOXA10-HOXA9 /// HOXA9 /// | 0.735 | 1.66 | 7.50E-08 | 3.51E-06 |
| 214651_s_at<br>1552316_a_a<br>t | MIR196B<br>GIMAP1                   | 0.734 | 1.66 | 2.39E-05 | 3.61E-04 |
| 208450_at                       | LGALS2                              | 0.733 | 1.66 | 1.50E-03 | 8.84E-03 |
| 231175_at                       | BEND6                               | 0.732 | 1.66 | 3.66E-05 | 5.01E-04 |
| 203932_at                       | HLA-DMB                             | 0.732 | 1.66 | 4.19E-12 | 9.98E-10 |

|                  |                          |       |      |          |          |
|------------------|--------------------------|-------|------|----------|----------|
| 229348_at        | UBIAD1                   | 0.732 | 1.66 | 4.88E-04 | 3.71E-03 |
| 211012_s_at      | PML                      | 0.731 | 1.66 | 5.00E-07 | 1.60E-05 |
| 218322_s_at      | ACSL5                    | 0.731 | 1.66 | 1.74E-06 | 4.37E-05 |
| 238581_at        | GBP5                     | 0.731 | 1.66 | 2.97E-04 | 2.55E-03 |
| 219836_at        | ZBED2                    | 0.731 | 1.66 | 3.24E-04 | 2.72E-03 |
| 209976_s_at      | CYP2E1                   | 0.731 | 1.66 | 3.02E-06 | 6.88E-05 |
| 207522_s_at      | ATP2A3                   | 0.731 | 1.66 | 1.42E-03 | 8.51E-03 |
| 230040_at        | ADAMTS18                 | 0.73  | 1.66 | 1.73E-03 | 9.82E-03 |
| 231348_s_at      | LMO3                     | 0.73  | 1.66 | 9.02E-03 | 3.39E-02 |
| 236514_at        | ACOT8                    | 0.73  | 1.66 | 6.49E-09 | 4.50E-07 |
| 211062_s_at      | CPZ /// GPR78            | 0.73  | 1.66 | 1.29E-06 | 3.44E-05 |
| 226439_s_at      | NBEA                     | 0.729 | 1.66 | 3.02E-05 | 4.33E-04 |
| 238114_at        | PCMTD1                   | 0.729 | 1.66 | 8.91E-07 | 2.55E-05 |
| 208131_s_at      | PTGIS                    | 0.729 | 1.66 | 7.91E-05 | 9.18E-04 |
| 231384_at        | GRIN2A                   | 0.729 | 1.66 | 9.34E-04 | 6.18E-03 |
| 215967_s_at      | LY9                      | 0.729 | 1.66 | 8.44E-08 | 3.83E-06 |
| 228724_at        | TTLL7                    | 0.728 | 1.66 | 2.26E-04 | 2.07E-03 |
| 230888_at        | WDR91                    | 0.728 | 1.66 | 5.85E-06 | 1.17E-04 |
| 230143_at        | RNF165                   | 0.728 | 1.66 | 6.36E-07 | 1.95E-05 |
| 226627_at        | 8-Sep                    | 0.728 | 1.66 | 1.03E-06 | 2.88E-05 |
| 1554240_a_a<br>t | ITGAL                    | 0.727 | 1.66 | 1.60E-06 | 4.10E-05 |
| 231323_at        | PSMB2                    | 0.727 | 1.66 | 1.74E-04 | 1.69E-03 |
| 210262_at        | CRISP2                   | 0.726 | 1.65 | 2.73E-03 | 1.39E-02 |
| 1554704_at       | ATP8B3                   | 0.726 | 1.65 | 8.91E-07 | 2.55E-05 |
| 205660_at        | OASL                     | 0.726 | 1.65 | 1.48E-05 | 2.47E-04 |
| 228658_at        | MIAT                     | 0.726 | 1.65 | 2.61E-04 | 2.31E-03 |
| 219505_at        | CECR1                    | 0.725 | 1.65 | 3.76E-04 | 3.05E-03 |
| 207381_at        | ALOX12B                  | 0.725 | 1.65 | 1.81E-03 | 1.01E-02 |
| 240409_at        | TPTE2P5                  | 0.725 | 1.65 | 8.98E-04 | 5.99E-03 |
| 219799_s_at      | DHRS9                    | 0.725 | 1.65 | 8.94E-05 | 1.01E-03 |
| 230805_at        | MIR142                   | 0.724 | 1.65 | 4.36E-08 | 2.23E-06 |
| 206587_at        | CCT6B                    | 0.724 | 1.65 | 5.32E-05 | 6.70E-04 |
| 206204_at        | GRB14                    | 0.724 | 1.65 | 1.06E-02 | 3.83E-02 |
| 206337_at        | CCR7                     | 0.723 | 1.65 | 5.51E-06 | 1.12E-04 |
| 225033_at        | ST3GAL1                  | 0.723 | 1.65 | 2.15E-07 | 8.04E-06 |
| 202982_s_at      | ACOT1 /// ACOT2          | 0.722 | 1.65 | 2.35E-03 | 1.24E-02 |
| 207547_s_at      | FAM107A /// LOC101059937 | 0.722 | 1.65 | 1.72E-06 | 4.33E-05 |
| 210215_at        | TFR2                     | 0.721 | 1.65 | 6.49E-07 | 1.98E-05 |
| 1561226_at       | XCR1                     | 0.721 | 1.65 | 3.00E-05 | 4.31E-04 |
| 204529_s_at      | TOX                      | 0.72  | 1.65 | 1.06E-05 | 1.89E-04 |
| 238018_at        | FAM150B                  | 0.72  | 1.65 | 3.91E-04 | 3.15E-03 |
| 230036_at        | SAMD9L                   | 0.719 | 1.65 | 1.61E-05 | 2.64E-04 |

|                  |                                                                        |       |      |          |          |
|------------------|------------------------------------------------------------------------|-------|------|----------|----------|
| 209685_s_at      | PRKCB                                                                  | 0.719 | 1.65 | 1.67E-06 | 4.23E-05 |
| 232027_at        | SYNE1                                                                  | 0.719 | 1.65 | 6.40E-05 | 7.73E-04 |
| 229857_s_at      | KANSL1-AS1                                                             | 0.719 | 1.65 | 9.15E-03 | 3.42E-02 |
| 223816_at        | SLC46A2                                                                | 0.719 | 1.65 | 5.71E-05 | 7.08E-04 |
| 208733_at        | RAB2A                                                                  | 0.718 | 1.65 | 2.72E-03 | 1.39E-02 |
| 202156_s_at      | CELF2                                                                  | 0.718 | 1.64 | 9.52E-07 | 2.69E-05 |
| 208018_s_at      | HCK                                                                    | 0.718 | 1.64 | 7.56E-08 | 3.52E-06 |
| 229092_at        | NR2F2                                                                  | 0.717 | 1.64 | 4.24E-05 | 5.60E-04 |
| 203766_s_at      | LMOD1                                                                  | 0.717 | 1.64 | 4.25E-04 | 3.35E-03 |
| 1557283_a_a<br>t | ZNF519                                                                 | 0.717 | 1.64 | 1.44E-05 | 2.42E-04 |
| 205749_at        | CYP1A1                                                                 | 0.715 | 1.64 | 1.03E-02 | 3.74E-02 |
| 37966_at         | PARVB                                                                  | 0.715 | 1.64 | 1.09E-05 | 1.93E-04 |
| 206856_at        | LILRB5                                                                 | 0.715 | 1.64 | 2.50E-05 | 3.74E-04 |
| 223946_at        | MED23                                                                  | 0.715 | 1.64 | 3.53E-05 | 4.86E-04 |
| 230873_at        | TTLL3                                                                  | 0.715 | 1.64 | 7.18E-04 | 5.01E-03 |
| 35974_at         | LRMP                                                                   | 0.714 | 1.64 | 4.99E-06 | 1.04E-04 |
| 202075_s_at      | PLTP                                                                   | 0.714 | 1.64 | 6.46E-10 | 6.75E-08 |
| 201037_at        | PFKP                                                                   | 0.713 | 1.64 | 1.01E-09 | 9.83E-08 |
| 230417_at        | GALNT16                                                                | 0.713 | 1.64 | 3.25E-05 | 4.57E-04 |
| 218066_at        | SLC12A7                                                                | 0.713 | 1.64 | 1.11E-06 | 3.06E-05 |
| 229105_at        | GPR39                                                                  | 0.712 | 1.64 | 9.52E-05 | 1.05E-03 |
| 1555728_a_a<br>t | MS4A4A                                                                 | 0.712 | 1.64 | 3.93E-08 | 2.05E-06 |
| 232083_at        | KIF16B                                                                 | 0.711 | 1.64 | 5.82E-04 | 4.26E-03 |
| 214889_at        | FAM149A                                                                | 0.711 | 1.64 | 1.60E-04 | 1.58E-03 |
| 209374_s_at      | IGHM                                                                   | 0.711 | 1.64 | 3.58E-03 | 1.70E-02 |
| 205221_at        | HGD                                                                    | 0.711 | 1.64 | 7.28E-03 | 2.89E-02 |
| 210321_at        | GZMH                                                                   | 0.711 | 1.64 | 7.47E-06 | 1.44E-04 |
| 1556136_at       | MYLK4                                                                  | 0.71  | 1.64 | 4.86E-04 | 3.70E-03 |
| 207100_s_at      | VAMP1                                                                  | 0.71  | 1.64 | 1.76E-05 | 2.84E-04 |
| 226811_at        | FAM46C                                                                 | 0.709 | 1.63 | 2.99E-05 | 4.30E-04 |
| 231911_at        | ERMN                                                                   | 0.709 | 1.63 | 3.21E-08 | 1.75E-06 |
| 203281_s_at      | MIR5193 /// UBA7                                                       | 0.709 | 1.63 | 5.53E-07 | 1.74E-05 |
| 214307_at        | HGD                                                                    | 0.707 | 1.63 | 7.24E-04 | 5.04E-03 |
| 229802_at        | WISP1                                                                  | 0.707 | 1.63 | 1.55E-04 | 1.54E-03 |
| 232300_at        | ADIRF-AS1<br>ARL17A /// ARL17B ///<br>LOC100294341 ///<br>LOC100996709 | 0.707 | 1.63 | 1.85E-04 | 1.77E-03 |
| 210718_s_at      | LRMP                                                                   | 0.706 | 1.63 | 2.78E-03 | 1.41E-02 |
| 204674_at        | LRMP                                                                   | 0.706 | 1.63 | 3.61E-06 | 7.97E-05 |
| 1559584_a_a<br>t | C16orf54                                                               | 0.706 | 1.63 | 4.46E-04 | 3.48E-03 |
| 229649_at        | NRXN3                                                                  | 0.706 | 1.63 | 3.12E-06 | 7.06E-05 |
| 213733_at        | MYO1F                                                                  | 0.706 | 1.63 | 9.19E-08 | 4.08E-06 |
| 219213_at        | JAM2                                                                   | 0.705 | 1.63 | 1.76E-05 | 2.84E-04 |

|              |                 |       |      |          |          |
|--------------|-----------------|-------|------|----------|----------|
| 231195_at    | KLRG2           | 0.705 | 1.63 | 4.56E-04 | 3.53E-03 |
| 223922_x_at  | MS4A6A          | 0.704 | 1.63 | 1.63E-06 | 4.15E-05 |
| 230616_at    | LAMB2P1         | 0.703 | 1.63 | 2.31E-06 | 5.52E-05 |
| 204735_at    | PDE4A           | 0.703 | 1.63 | 5.83E-10 | 6.19E-08 |
| 220595_at    | PDZRN4          | 0.703 | 1.63 | 2.15E-04 | 2.00E-03 |
| 230405_at    | C5orf56         | 0.702 | 1.63 | 2.42E-06 | 5.73E-05 |
| 204220_at    | GMFG            | 0.702 | 1.63 | 5.65E-07 | 1.77E-05 |
| 236583_at    | GIMAP1          | 0.7   | 1.62 | 6.58E-05 | 7.91E-04 |
| 211909_x_at  | PTGER3          | 0.7   | 1.62 | 1.18E-04 | 1.24E-03 |
| 232570_s_at  | ADAM33          | 0.699 | 1.62 | 8.29E-05 | 9.52E-04 |
| 210297_s_at  | MSMB            | 0.698 | 1.62 | 6.78E-03 | 2.74E-02 |
| 227048_at    | LAMA1           | 0.698 | 1.62 | 1.30E-03 | 7.96E-03 |
| 228111_s_at  | DNAH1           | 0.698 | 1.62 | 3.24E-05 | 4.56E-04 |
| 204014_at    | DUSP4           | 0.698 | 1.62 | 2.89E-05 | 4.18E-04 |
| 222592_s_at  | ACSL5           | 0.698 | 1.62 | 9.79E-05 | 1.07E-03 |
| 1562247_at   | LOC286058       | 0.698 | 1.62 | 1.77E-05 | 2.84E-04 |
| 212187_x_at  | PTGDS           | 0.697 | 1.62 | 6.68E-05 | 8.00E-04 |
| 1553212_at   | KRT78           | 0.697 | 1.62 | 2.69E-03 | 1.38E-02 |
| 219690_at    | IGFLR1          | 0.697 | 1.62 | 5.22E-06 | 1.07E-04 |
| 228132_at    | ABLIM2          | 0.697 | 1.62 | 2.36E-07 | 8.65E-06 |
| 217557_s_at  | CPM             | 0.697 | 1.62 | 8.74E-06 | 1.62E-04 |
| 207561_s_at  | ABCB8 /// ASIC3 | 0.696 | 1.62 | 6.71E-04 | 4.74E-03 |
| 219723_x_at  | AGPAT3          | 0.696 | 1.62 | 1.60E-05 | 2.63E-04 |
| 230974_at    | DDX19B          | 0.695 | 1.62 | 2.64E-06 | 6.15E-05 |
| 205619_s_at  | MEOX1           | 0.695 | 1.62 | 3.08E-07 | 1.08E-05 |
| 227563_at    | FAM27E3         | 0.695 | 1.62 | 2.16E-04 | 2.00E-03 |
| 230453_s_at  | ATP2A3          | 0.694 | 1.62 | 1.10E-03 | 6.97E-03 |
| 215082_at    | ELOVL5          | 0.694 | 1.62 | 1.34E-02 | 4.58E-02 |
| 1553890_s_at | NTN5            | 0.694 | 1.62 | 8.63E-04 | 5.80E-03 |
| 1560011_at   | JRK             | 0.694 | 1.62 | 1.15E-05 | 2.00E-04 |
| 239273_s_at  | MMP28           | 0.694 | 1.62 | 1.10E-04 | 1.18E-03 |
| 226972_s_at  | CCDC136         | 0.693 | 1.62 | 4.22E-05 | 5.57E-04 |
| 225353_s_at  | C1QC            | 0.692 | 1.62 | 1.59E-07 | 6.27E-06 |
| 44790_s_at   | KIAA0226L       | 0.691 | 1.61 | 4.47E-05 | 5.83E-04 |
| 206060_s_at  | PTPN22          | 0.691 | 1.61 | 7.24E-06 | 1.40E-04 |
| 214963_at    | NUP160          | 0.691 | 1.61 | 7.44E-05 | 8.73E-04 |
| 206539_s_at  | CYP4F12         | 0.691 | 1.61 | 2.12E-04 | 1.97E-03 |
| 205225_at    | ESR1            | 0.69  | 1.61 | 2.70E-05 | 3.97E-04 |
| 213942_at    | MEGF6           | 0.69  | 1.61 | 2.32E-06 | 5.52E-05 |
| 219959_at    | MOCOS           | 0.689 | 1.61 | 9.81E-03 | 3.61E-02 |
| 210432_s_at  | SCN3A           | 0.689 | 1.61 | 3.28E-03 | 1.60E-02 |
| 228150_at    | SEC16B          | 0.689 | 1.61 | 1.26E-07 | 5.22E-06 |

|                  |                        |       |      |          |          |
|------------------|------------------------|-------|------|----------|----------|
| 228607_at        | OAS2                   | 0.688 | 1.61 | 4.54E-06 | 9.59E-05 |
| 219211_at        | USP18                  | 0.688 | 1.61 | 8.11E-06 | 1.53E-04 |
| 202510_s_at      | TNFAIP2                | 0.688 | 1.61 | 8.25E-08 | 3.77E-06 |
| 201422_at        | IFI30 /// PIK3R2       | 0.688 | 1.61 | 4.25E-08 | 2.19E-06 |
| 204829_s_at      | FOLR2                  | 0.687 | 1.61 | 7.94E-06 | 1.50E-04 |
| 236055_at        | DQX1                   | 0.687 | 1.61 | 2.05E-04 | 1.92E-03 |
| 205066_s_at      | ENPP1                  | 0.687 | 1.61 | 6.53E-05 | 7.85E-04 |
| 218400_at        | OAS3                   | 0.687 | 1.61 | 2.96E-05 | 4.26E-04 |
| 235056_at        | ETV6                   | 0.686 | 1.61 | 3.27E-06 | 7.32E-05 |
| 223950_s_at      | FLYWCH1                | 0.686 | 1.61 | 1.07E-03 | 6.83E-03 |
| 244070_at        | SYNE1                  | 0.686 | 1.61 | 1.86E-05 | 2.96E-04 |
| 235122_at        | HIVEP3                 | 0.685 | 1.61 | 2.18E-04 | 2.02E-03 |
| 214746_s_at      | ZNF467                 | 0.685 | 1.61 | 1.68E-03 | 9.61E-03 |
| 228182_at        | ADCY5                  | 0.685 | 1.61 | 2.73E-04 | 2.39E-03 |
| 230488_s_at      | DBH-AS1                | 0.685 | 1.61 | 1.44E-05 | 2.42E-04 |
| 238422_at        | LBX2-AS1               | 0.684 | 1.61 | 2.44E-04 | 2.19E-03 |
| 205896_at        | SLC22A4                | 0.684 | 1.61 | 1.25E-02 | 4.34E-02 |
| 210982_s_at      | HLA-DRA                | 0.684 | 1.61 | 4.52E-05 | 5.88E-04 |
| 223800_s_at      | LIMS3 /// LIMS3L       | 0.683 | 1.61 | 1.20E-05 | 2.08E-04 |
| 1569886_a_a<br>t | GLB1L3                 | 0.683 | 1.61 | 2.53E-05 | 3.78E-04 |
| 219562_at        | RAB26                  | 0.682 | 1.6  | 2.21E-04 | 2.04E-03 |
| 244251_at        | LCP2                   | 0.682 | 1.6  | 1.06E-06 | 2.95E-05 |
| 1562573_at       | CYP17A1                | 0.682 | 1.6  | 4.30E-04 | 3.38E-03 |
| 219471_at        | KIAA0226L              | 0.682 | 1.6  | 4.01E-05 | 5.37E-04 |
| 234994_at        | TMEM200A               | 0.682 | 1.6  | 2.04E-04 | 1.91E-03 |
| 205073_at        | CYP2J2                 | 0.682 | 1.6  | 2.69E-04 | 2.37E-03 |
| 213160_at        | DOCK2                  | 0.681 | 1.6  | 9.57E-07 | 2.70E-05 |
| 229222_at        | ACSS3                  | 0.681 | 1.6  | 3.59E-05 | 4.92E-04 |
| 208189_s_at      | MYO7A                  | 0.681 | 1.6  | 9.60E-06 | 1.74E-04 |
| 206030_at        | ASPA                   | 0.68  | 1.6  | 1.18E-04 | 1.25E-03 |
| 209695_at        | PTP4A3                 | 0.68  | 1.6  | 1.15E-05 | 2.00E-04 |
| 1553213_a_a<br>t | KRT78                  | 0.68  | 1.6  | 1.33E-03 | 8.09E-03 |
| 1568638_a_a<br>t | IDO2                   | 0.679 | 1.6  | 2.72E-06 | 6.31E-05 |
| 210253_at        | HTATIP2                | 0.679 | 1.6  | 3.18E-05 | 4.50E-04 |
| 209948_at        | KCNMB1                 | 0.679 | 1.6  | 2.27E-04 | 2.07E-03 |
| 203673_at        | TG                     | 0.678 | 1.6  | 1.18E-03 | 7.37E-03 |
| 214210_at        | SLC25A17               | 0.678 | 1.6  | 1.73E-07 | 6.73E-06 |
| 211740_at        | ICA1                   | 0.678 | 1.6  | 6.79E-03 | 2.75E-02 |
| 204563_at        | SELL                   | 0.678 | 1.6  | 2.43E-03 | 1.27E-02 |
| 214719_at        | SLC46A3                | 0.677 | 1.6  | 1.58E-07 | 6.27E-06 |
| 229947_at        | PI15                   | 0.677 | 1.6  | 1.58E-04 | 1.57E-03 |
| 1559050_at       | HCG27 /// LOC100996357 | 0.677 | 1.6  | 1.28E-05 | 2.20E-04 |

|              |                                     |       |      |          |          |
|--------------|-------------------------------------|-------|------|----------|----------|
| 244444_at    | PKD1L2                              | 0.677 | 1.6  | 7.06E-05 | 8.36E-04 |
| 239345_at    | SLC19A3                             | 0.676 | 1.6  | 3.07E-04 | 2.61E-03 |
| 204914_s_at  | SOX11                               | 0.676 | 1.6  | 6.54E-03 | 2.67E-02 |
| 205306_x_at  | KMO                                 | 0.676 | 1.6  | 5.69E-05 | 7.06E-04 |
| 232024_at    | GIMAP2                              | 0.676 | 1.6  | 1.47E-07 | 5.92E-06 |
| 237411_at    | ADAMTS6                             | 0.676 | 1.6  | 2.26E-04 | 2.07E-03 |
| 205593_s_at  | PDE9A                               | 0.676 | 1.6  | 3.44E-04 | 2.85E-03 |
| 211685_s_at  | NCALD                               | 0.676 | 1.6  | 2.83E-03 | 1.43E-02 |
| 219429_at    | FA2H                                | 0.675 | 1.6  | 5.81E-05 | 7.16E-04 |
| 205898_at    | CX3CR1                              | 0.675 | 1.6  | 5.12E-06 | 1.06E-04 |
| 230425_at    | EPHB1                               | 0.675 | 1.6  | 4.81E-05 | 6.17E-04 |
| 227867_at    | TRABD2A                             | 0.675 | 1.6  | 5.30E-05 | 6.70E-04 |
| 239582_at    | PML                                 | 0.675 | 1.6  | 6.35E-08 | 3.07E-06 |
| 229015_at    | LOC286367                           | 0.674 | 1.6  | 2.70E-03 | 1.38E-02 |
| 1570020_at   | AACSP1                              | 0.674 | 1.6  | 8.07E-04 | 5.48E-03 |
| 209670_at    | TRAC                                | 0.673 | 1.59 | 4.82E-07 | 1.55E-05 |
| 209883_at    | COLGALT2                            | 0.673 | 1.59 | 2.70E-04 | 2.37E-03 |
| 206502_s_at  | INSM1                               | 0.673 | 1.59 | 1.03E-04 | 1.12E-03 |
| 239178_at    | FGF9                                | 0.673 | 1.59 | 9.57E-05 | 1.05E-03 |
| 1556063_s_at | RPP30                               | 0.672 | 1.59 | 3.53E-06 | 7.81E-05 |
| 224225_s_at  | ETV7                                | 0.672 | 1.59 | 8.89E-05 | 1.00E-03 |
| 228780_at    | POU3F3                              | 0.671 | 1.59 | 6.48E-05 | 7.80E-04 |
| 37145_at     | GNLY                                | 0.671 | 1.59 | 2.47E-04 | 2.21E-03 |
| 235780_at    | PRKACB                              | 0.671 | 1.59 | 4.62E-06 | 9.72E-05 |
| 230631_s_at  | IL10RB-AS1                          | 0.671 | 1.59 | 2.00E-04 | 1.89E-03 |
| 208606_s_at  | WNT4                                | 0.67  | 1.59 | 2.53E-04 | 2.25E-03 |
| 213309_at    | PLCL2                               | 0.67  | 1.59 | 5.77E-06 | 1.16E-04 |
| 1556471_at   | SCML4                               | 0.67  | 1.59 | 1.82E-05 | 2.90E-04 |
| 232794_at    | LOC153682                           | 0.669 | 1.59 | 6.96E-06 | 1.36E-04 |
| 203402_at    | KCNAB2                              | 0.668 | 1.59 | 5.67E-07 | 1.77E-05 |
| 237753_at    | IL21R                               | 0.668 | 1.59 | 3.44E-04 | 2.85E-03 |
| 207900_at    | CCL17                               | 0.667 | 1.59 | 1.35E-04 | 1.39E-03 |
| 206552_s_at  | TAC1                                | 0.667 | 1.59 | 2.24E-03 | 1.20E-02 |
| 210794_s_at  | MEG3                                | 0.667 | 1.59 | 2.71E-05 | 3.97E-04 |
| 230169_at    | THAP6                               | 0.667 | 1.59 | 7.26E-07 | 2.17E-05 |
| 40420_at     | STK10                               | 0.667 | 1.59 | 1.36E-09 | 1.24E-07 |
| 1554057_at   | ASH1L-AS1                           | 0.667 | 1.59 | 3.09E-04 | 2.63E-03 |
| 203559_s_at  | ABP1                                | 0.667 | 1.59 | 3.66E-06 | 8.07E-05 |
| 202952_s_at  | ADAM12                              | 0.666 | 1.59 | 1.12E-04 | 1.20E-03 |
| 211748_x_at  | PTGDS                               | 0.666 | 1.59 | 1.56E-05 | 2.57E-04 |
| 206655_s_at  | GP1BB /// SEPT5 /// SEPT5-<br>GP1BB | 0.666 | 1.59 | 1.89E-03 | 1.05E-02 |
| 207376_at    | VENTX                               | 0.666 | 1.59 | 5.26E-06 | 1.08E-04 |

|              |                          |       |      |          |          |
|--------------|--------------------------|-------|------|----------|----------|
| 219232_s_at  | EGLN3                    | 0.666 | 1.59 | 2.18E-06 | 5.25E-05 |
| 226777_at    | ADAM12 /// ADAM12-OT1    | 0.665 | 1.59 | 2.09E-04 | 1.95E-03 |
| 242450_at    | RGMB                     | 0.665 | 1.59 | 2.02E-04 | 1.90E-03 |
| 208195_at    | TTN                      | 0.665 | 1.59 | 7.64E-06 | 1.46E-04 |
| 204940_at    | PLN                      | 0.664 | 1.58 | 9.83E-03 | 3.62E-02 |
| 226906_s_at  | ARHGAP9                  | 0.664 | 1.58 | 7.69E-07 | 2.27E-05 |
| 204265_s_at  | GPSM3                    | 0.663 | 1.58 | 3.41E-07 | 1.17E-05 |
| 228647_at    | LOC100049716             | 0.663 | 1.58 | 8.58E-07 | 2.48E-05 |
| 235050_at    | SLC2A12                  | 0.662 | 1.58 | 6.29E-05 | 7.64E-04 |
| 213693_s_at  | MUC1                     | 0.661 | 1.58 | 7.24E-03 | 2.88E-02 |
| 204717_s_at  | SLC29A2                  | 0.661 | 1.58 | 5.55E-06 | 1.12E-04 |
| 224932_at    | CHCHD10                  | 0.661 | 1.58 | 1.49E-06 | 3.86E-05 |
| 204198_s_at  | RUNX3                    | 0.661 | 1.58 | 4.86E-07 | 1.56E-05 |
| 1559839_at   | TBX18                    | 0.66  | 1.58 | 8.82E-04 | 5.90E-03 |
| 229019_at    | ZNF385B                  | 0.66  | 1.58 | 2.70E-03 | 1.38E-02 |
| 206600_s_at  | SLC16A5                  | 0.66  | 1.58 | 3.50E-05 | 4.83E-04 |
| 227201_at    | LOC643837                | 0.66  | 1.58 | 1.17E-04 | 1.24E-03 |
| 232792_at    | TRIM69                   | 0.66  | 1.58 | 2.00E-05 | 3.12E-04 |
| 237493_at    | IL22RA2                  | 0.659 | 1.58 | 9.89E-08 | 4.33E-06 |
| 205522_at    | HOXD4                    | 0.659 | 1.58 | 5.56E-05 | 6.94E-04 |
| 1559144_x_at | LINC00910                | 0.659 | 1.58 | 1.56E-05 | 2.58E-04 |
| 226743_at    | SLFN11                   | 0.658 | 1.58 | 4.62E-08 | 2.35E-06 |
| 214828_s_at  | RRP7A /// RRP7B          | 0.658 | 1.58 | 9.35E-03 | 3.48E-02 |
| 230756_at    | ZNF683                   | 0.658 | 1.58 | 1.54E-09 | 1.36E-07 |
| 230440_at    | ZNF469                   | 0.658 | 1.58 | 1.25E-06 | 3.36E-05 |
| 204438_at    | MRC1                     | 0.658 | 1.58 | 1.76E-06 | 4.40E-05 |
| 204499_at    | AGTPBP1                  | 0.657 | 1.58 | 9.87E-06 | 1.78E-04 |
| 243606_at    | NXPE3                    | 0.657 | 1.58 | 1.69E-05 | 2.74E-04 |
| 206170_at    | ADRB2                    | 0.657 | 1.58 | 8.27E-10 | 8.35E-08 |
| 242204_at    | WFDC5                    | 0.656 | 1.58 | 2.92E-04 | 2.53E-03 |
| 204301_at    | KBTBD11                  | 0.655 | 1.58 | 1.93E-06 | 4.75E-05 |
| 1554003_at   | ARHGEF28                 | 0.655 | 1.58 | 3.67E-05 | 5.01E-04 |
| 206710_s_at  | EPB41L3                  | 0.655 | 1.57 | 1.46E-07 | 5.90E-06 |
| 207238_s_at  | PTPRC                    | 0.655 | 1.57 | 1.47E-04 | 1.49E-03 |
| 242388_x_at  | TAGAP                    | 0.655 | 1.57 | 1.42E-04 | 1.44E-03 |
| 230145_at    | DUS3L                    | 0.655 | 1.57 | 2.72E-04 | 2.39E-03 |
| 227794_at    | GLYATL1 /// LOC100287413 | 0.654 | 1.57 | 3.43E-03 | 1.65E-02 |
| 234312_s_at  | ACSS2                    | 0.654 | 1.57 | 1.03E-04 | 1.11E-03 |
| 236673_at    | TIFAB                    | 0.654 | 1.57 | 1.11E-06 | 3.06E-05 |
| 206219_s_at  | VAV1                     | 0.653 | 1.57 | 5.37E-07 | 1.69E-05 |
| 209083_at    | CORO1A                   | 0.653 | 1.57 | 2.12E-06 | 5.13E-05 |
| 239694_at    | TRIM7                    | 0.653 | 1.57 | 3.67E-05 | 5.01E-04 |

|             |                               |       |      |          |          |
|-------------|-------------------------------|-------|------|----------|----------|
| 225285_at   | BCAT1                         | 0.653 | 1.57 | 3.02E-04 | 2.58E-03 |
| 212750_at   | PPP1R16B                      | 0.652 | 1.57 | 3.06E-07 | 1.07E-05 |
| 207328_at   | ALOX15                        | 0.652 | 1.57 | 6.42E-04 | 4.59E-03 |
| 208056_s_at | CBFA2T3                       | 0.651 | 1.57 | 2.64E-04 | 2.33E-03 |
| 235891_at   | DNM3OS /// MIR214 /// MIR3120 | 0.651 | 1.57 | 3.53E-05 | 4.86E-04 |
| 203561_at   | FCGR2A                        | 0.651 | 1.57 | 6.11E-06 | 1.21E-04 |
| 219610_at   | ARHGEF28                      | 0.651 | 1.57 | 2.35E-07 | 8.63E-06 |
| 223741_s_at | TTYH2                         | 0.65  | 1.57 | 4.03E-04 | 3.22E-03 |
| 231600_at   | CLEC12B                       | 0.65  | 1.57 | 8.90E-03 | 3.35E-02 |
| 36030_at    | IFFO1                         | 0.649 | 1.57 | 8.95E-06 | 1.65E-04 |
| 222124_at   | HIF3A                         | 0.648 | 1.57 | 7.21E-03 | 2.87E-02 |
| 204629_at   | PARVB                         | 0.648 | 1.57 | 2.92E-05 | 4.22E-04 |
| 226841_at   | MPEG1                         | 0.648 | 1.57 | 1.37E-06 | 3.61E-05 |
| 206726_at   | HPGDS                         | 0.647 | 1.57 | 7.13E-03 | 2.85E-02 |
| 226611_s_at | CENPV                         | 0.647 | 1.57 | 4.45E-05 | 5.80E-04 |
| 233510_s_at | PARVG                         | 0.647 | 1.57 | 2.27E-05 | 3.46E-04 |
| 206693_at   | IL7                           | 0.646 | 1.57 | 8.50E-06 | 1.58E-04 |
| 242414_at   | QPRT                          | 0.646 | 1.57 | 5.04E-05 | 6.43E-04 |
| 213489_at   | MAPRE2                        | 0.646 | 1.57 | 2.81E-06 | 6.46E-05 |
| 336_at      | TBXA2R                        | 0.646 | 1.56 | 1.83E-03 | 1.03E-02 |
| 202803_s_at | ITGB2                         | 0.646 | 1.56 | 4.02E-05 | 5.37E-04 |
| 223534_s_at | RPS6KL1                       | 0.646 | 1.56 | 4.55E-05 | 5.91E-04 |
| 237316_at   | ANKDD1A                       | 0.646 | 1.56 | 4.43E-03 | 2.00E-02 |
| 235597_s_at | RGPD1 /// RGPD2               | 0.646 | 1.56 | 2.30E-03 | 1.22E-02 |
| 205880_at   | PRKD1                         | 0.646 | 1.56 | 8.44E-07 | 2.45E-05 |
| 235708_at   | KLB                           | 0.646 | 1.56 | 1.50E-02 | 4.97E-02 |
| 241765_at   | CPM                           | 0.645 | 1.56 | 1.25E-05 | 2.16E-04 |
| 213213_at   | DIDO1                         | 0.645 | 1.56 | 4.05E-05 | 5.40E-04 |
| 217525_at   | OLFML1                        | 0.645 | 1.56 | 2.48E-05 | 3.72E-04 |
| 204118_at   | CD48                          | 0.644 | 1.56 | 9.86E-04 | 6.44E-03 |
| 230360_at   | GLDN                          | 0.644 | 1.56 | 6.95E-07 | 2.10E-05 |
| 222218_s_at | PILRA                         | 0.644 | 1.56 | 1.55E-05 | 2.57E-04 |
| 235634_at   | PURG                          | 0.644 | 1.56 | 1.92E-03 | 1.06E-02 |
| 244680_at   | GLRB                          | 0.644 | 1.56 | 2.74E-04 | 2.40E-03 |
| 211795_s_at | FYB                           | 0.643 | 1.56 | 4.75E-05 | 6.11E-04 |
| 239675_at   | LINC00900                     | 0.643 | 1.56 | 4.58E-04 | 3.54E-03 |
| 224027_at   | CCL28                         | 0.643 | 1.56 | 5.04E-06 | 1.05E-04 |
| 1554248_at  | ZNF638                        | 0.643 | 1.56 | 5.93E-04 | 4.31E-03 |
| 227412_at   | PPP1R3E                       | 0.643 | 1.56 | 6.38E-06 | 1.26E-04 |
| 235292_at   | FLJ32255                      | 0.643 | 1.56 | 1.52E-05 | 2.52E-04 |
| 239130_at   | MIR101-1 /// MIR3671          | 0.642 | 1.56 | 2.09E-04 | 1.95E-03 |
| 220073_s_at | PLEKHG6                       | 0.642 | 1.56 | 9.75E-06 | 1.76E-04 |
| 1560698_a_a | TRHDE-AS1                     | 0.642 | 1.56 | 1.28E-03 | 7.87E-03 |



| t                |                               |       |      |          |          |
|------------------|-------------------------------|-------|------|----------|----------|
| 214053_at        | ERBB4                         | 0.642 | 1.56 | 1.40E-02 | 4.72E-02 |
| 244779_at        | ZDHHC2                        | 0.642 | 1.56 | 1.14E-05 | 2.00E-04 |
| 204336_s_at      | RGS19                         | 0.642 | 1.56 | 3.47E-05 | 4.80E-04 |
| 242013_at        | BCL2L15                       | 0.641 | 1.56 | 5.81E-05 | 7.17E-04 |
| 223533_at        | LRRC8C                        | 0.641 | 1.56 | 7.71E-04 | 5.28E-03 |
| 225973_at        | TAP2                          | 0.641 | 1.56 | 9.34E-06 | 1.71E-04 |
| 219195_at        | PPARGC1A                      | 0.641 | 1.56 | 1.22E-03 | 7.57E-03 |
| 1552497_a_a<br>t | SLAMF6                        | 0.641 | 1.56 | 3.68E-05 | 5.01E-04 |
| 207351_s_at      | SH2D2A                        | 0.641 | 1.56 | 2.18E-06 | 5.25E-05 |
| 226955_at        | AFAP1L1                       | 0.64  | 1.56 | 3.82E-04 | 3.09E-03 |
| 205337_at        | DCT                           | 0.64  | 1.56 | 4.53E-04 | 3.52E-03 |
| 1552634_a_a<br>t | ZNF101                        | 0.64  | 1.56 | 3.85E-04 | 3.11E-03 |
| 242940_x_at      | DLX6                          | 0.639 | 1.56 | 3.00E-04 | 2.57E-03 |
| 240509_s_at      | GREM2                         | 0.639 | 1.56 | 1.94E-03 | 1.07E-02 |
| 222101_s_at      | DCHS1                         | 0.639 | 1.56 | 5.64E-04 | 4.15E-03 |
| 205671_s_at      | HLA-DOB                       | 0.639 | 1.56 | 7.30E-03 | 2.90E-02 |
| 225909_at        | LOC728743 /// ZNF775          | 0.639 | 1.56 | 6.79E-05 | 8.11E-04 |
| 240429_at        | ZNF546                        | 0.639 | 1.56 | 3.59E-05 | 4.92E-04 |
| 229052_at        | ANKRD23 /// ANKRD39           | 0.639 | 1.56 | 9.20E-05 | 1.03E-03 |
| 220384_at        | NME8<br>AKR1C1 /// AKR1C2 /// | 0.638 | 1.56 | 1.44E-03 | 8.58E-03 |
| 1555854_at       | LOC101060798                  | 0.638 | 1.56 | 9.23E-03 | 3.44E-02 |
| 209546_s_at      | APOL1                         | 0.638 | 1.56 | 5.18E-06 | 1.07E-04 |
| 210576_at        | CYP4F8                        | 0.638 | 1.56 | 2.90E-03 | 1.46E-02 |
| 205433_at        | BCHE                          | 0.637 | 1.56 | 1.38E-04 | 1.41E-03 |
| 215446_s_at      | LOX                           | 0.637 | 1.56 | 2.99E-05 | 4.30E-04 |
| 221916_at        | NEFL                          | 0.637 | 1.55 | 3.00E-03 | 1.49E-02 |
| 39402_at         | IL1B                          | 0.636 | 1.55 | 5.43E-04 | 4.03E-03 |
| 228448_at        | MAP6                          | 0.636 | 1.55 | 9.37E-06 | 1.71E-04 |
| 211743_s_at      | PRG2                          | 0.636 | 1.55 | 3.33E-03 | 1.61E-02 |
| 210451_at        | PKLR                          | 0.635 | 1.55 | 4.52E-03 | 2.03E-02 |
| 224456_s_at      | FOXD2-AS1                     | 0.635 | 1.55 | 3.43E-04 | 2.84E-03 |
| 204785_x_at      | IFNAR2                        | 0.635 | 1.55 | 1.45E-04 | 1.47E-03 |
| 229797_at        | MCOLN3                        | 0.634 | 1.55 | 1.34E-03 | 8.12E-03 |
| 215303_at        | DCLK1                         | 0.634 | 1.55 | 6.49E-04 | 4.63E-03 |
| 231980_at        | DOK6                          | 0.634 | 1.55 | 1.09E-03 | 6.92E-03 |
| 1553454_at       | RPTN                          | 0.634 | 1.55 | 6.20E-03 | 2.57E-02 |
| 224463_s_at      | C11orf70                      | 0.634 | 1.55 | 9.45E-05 | 1.05E-03 |
| 228160_at        | LINC00667                     | 0.633 | 1.55 | 2.09E-04 | 1.95E-03 |
| 236436_at        | SLC25A45                      | 0.633 | 1.55 | 2.00E-05 | 3.12E-04 |
| 238025_at        | MLKL                          | 0.633 | 1.55 | 2.37E-05 | 3.58E-04 |
| 222905_s_at      | TMEM143                       | 0.633 | 1.55 | 5.48E-06 | 1.11E-04 |

|             |                        |       |      |          |          |
|-------------|------------------------|-------|------|----------|----------|
| 206421_s_at | SERPINB7               | 0.633 | 1.55 | 7.51E-03 | 2.96E-02 |
| 220435_at   | SLC30A10               | 0.633 | 1.55 | 5.53E-03 | 2.37E-02 |
| 239846_at   | MTHFD1                 | 0.632 | 1.55 | 9.08E-05 | 1.02E-03 |
| 209765_at   | ADAM19                 | 0.631 | 1.55 | 1.74E-05 | 2.81E-04 |
| 223699_at   | CNDP1                  | 0.631 | 1.55 | 1.33E-02 | 4.55E-02 |
| 203508_at   | TNFRSF1B               | 0.631 | 1.55 | 1.07E-07 | 4.58E-06 |
| 212276_at   | LPIN1                  | 0.631 | 1.55 | 4.27E-05 | 5.63E-04 |
| 211343_s_at | COL13A1                | 0.63  | 1.55 | 1.01E-06 | 2.85E-05 |
| 204908_s_at | BCL3                   | 0.63  | 1.55 | 6.99E-05 | 8.31E-04 |
| 214186_s_at | HCG26                  | 0.63  | 1.55 | 1.52E-04 | 1.52E-03 |
| 213566_at   | RNASE6                 | 0.63  | 1.55 | 4.34E-06 | 9.24E-05 |
| 202888_s_at | ANPEP                  | 0.63  | 1.55 | 1.53E-08 | 9.29E-07 |
| 209375_at   | XPC                    | 0.629 | 1.55 | 4.04E-05 | 5.39E-04 |
| 228847_at   | EXOC3                  | 0.629 | 1.55 | 1.98E-04 | 1.87E-03 |
| 201137_s_at | HLA-DPB1               | 0.629 | 1.55 | 1.51E-05 | 2.51E-04 |
| 208335_s_at | DARC                   | 0.628 | 1.55 | 3.07E-06 | 6.96E-05 |
| 212611_at   | DTX4                   | 0.628 | 1.55 | 5.64E-05 | 7.02E-04 |
| 219734_at   | SIDT1                  | 0.628 | 1.55 | 6.58E-06 | 1.29E-04 |
| 202465_at   | PCOLCE                 | 0.628 | 1.55 | 5.83E-07 | 1.81E-05 |
| 212451_at   | SECISBP2L              | 0.628 | 1.54 | 2.79E-05 | 4.07E-04 |
| 203523_at   | LSP1                   | 0.627 | 1.54 | 1.67E-05 | 2.72E-04 |
| 236480_at   | MIR210HG               | 0.627 | 1.54 | 3.87E-04 | 3.12E-03 |
| 229734_at   | MIR4697HG              | 0.627 | 1.54 | 2.73E-07 | 9.75E-06 |
| 206345_s_at | PON1                   | 0.627 | 1.54 | 1.48E-03 | 8.74E-03 |
| 210664_s_at | TFPI                   | 0.626 | 1.54 | 4.02E-05 | 5.37E-04 |
| 206974_at   | CXCR6                  | 0.626 | 1.54 | 5.72E-06 | 1.15E-04 |
| 227482_at   | ADCK1                  | 0.626 | 1.54 | 1.78E-04 | 1.71E-03 |
| 210194_at   | PLA2R1                 | 0.626 | 1.54 | 2.67E-05 | 3.94E-04 |
| 242207_at   | CENPP /// LOC100128361 | 0.626 | 1.54 | 1.04E-04 | 1.12E-03 |
| 1552410_at  | CLEC4F                 | 0.626 | 1.54 | 4.85E-04 | 3.70E-03 |
| 239683_at   | CLYBL                  | 0.626 | 1.54 | 2.17E-05 | 3.34E-04 |
| 213326_at   | VAMP1                  | 0.625 | 1.54 | 2.82E-05 | 4.11E-04 |
| 234946_at   | ENTPD6                 | 0.625 | 1.54 | 1.35E-03 | 8.19E-03 |
| 204820_s_at | BTN3A2 /// BTN3A3      | 0.625 | 1.54 | 1.76E-07 | 6.81E-06 |
| 230626_at   | TSPAN12                | 0.624 | 1.54 | 8.43E-03 | 3.22E-02 |
| 205399_at   | DCLK1                  | 0.624 | 1.54 | 4.38E-06 | 9.30E-05 |
| 208894_at   | HLA-DRA                | 0.624 | 1.54 | 5.23E-04 | 3.91E-03 |
| 239260_at   | CORIN                  | 0.624 | 1.54 | 3.64E-04 | 2.97E-03 |
| 236154_at   | QKI                    | 0.624 | 1.54 | 9.83E-05 | 1.08E-03 |
| 238121_at   | GK5                    | 0.624 | 1.54 | 1.01E-05 | 1.82E-04 |
| 214032_at   | ZAP70                  | 0.624 | 1.54 | 1.20E-08 | 7.57E-07 |
| 213820_s_at | STARD5                 | 0.623 | 1.54 | 2.62E-06 | 6.11E-05 |
| 228888_at   | STAC2                  | 0.623 | 1.54 | 4.39E-03 | 1.98E-02 |

|              |            |       |      |          |          |
|--------------|------------|-------|------|----------|----------|
| 226047_at    | MRVI1      | 0.623 | 1.54 | 7.35E-04 | 5.09E-03 |
| 1555865_at   | TOLLIP-AS1 | 0.623 | 1.54 | 9.22E-04 | 6.11E-03 |
| 1555579_s_at | PTPRM      | 0.622 | 1.54 | 2.42E-06 | 5.73E-05 |
| 228167_at    | KLHL6      | 0.622 | 1.54 | 9.50E-05 | 1.05E-03 |
| 233880_at    | RNF213     | 0.621 | 1.54 | 1.48E-05 | 2.47E-04 |
| 213559_s_at  | ZNF467     | 0.621 | 1.54 | 1.56E-03 | 9.09E-03 |
| 238423_at    | SYTL3      | 0.621 | 1.54 | 1.55E-03 | 9.07E-03 |
| 219056_at    | RNASEH2B   | 0.621 | 1.54 | 6.42E-05 | 7.74E-04 |
| 220351_at    | CCRL1      | 0.621 | 1.54 | 4.25E-03 | 1.94E-02 |
| 210325_at    | CD1A       | 0.62  | 1.54 | 1.33E-04 | 1.37E-03 |
| 244468_at    | PDZK1P1    | 0.62  | 1.54 | 7.80E-05 | 9.08E-04 |
| 1554824_at   | ZNF585A    | 0.62  | 1.54 | 2.71E-04 | 2.38E-03 |
| 202499_s_at  | SLC2A3     | 0.62  | 1.54 | 6.09E-03 | 2.53E-02 |
| 203332_s_at  | INPP5D     | 0.619 | 1.54 | 5.04E-07 | 1.60E-05 |
| 227285_at    | C1orf51    | 0.619 | 1.54 | 1.04E-04 | 1.13E-03 |
| 235414_at    | ZNF383     | 0.619 | 1.54 | 3.02E-05 | 4.33E-04 |
| 223423_at    | GPR160     | 0.619 | 1.54 | 1.02E-04 | 1.11E-03 |
| 219525_at    | SLC47A1    | 0.619 | 1.54 | 8.62E-04 | 5.80E-03 |
| 219131_at    | UBIAD1     | 0.619 | 1.54 | 3.06E-03 | 1.52E-02 |
| 235593_at    | ZEB2       | 0.619 | 1.54 | 4.49E-04 | 3.50E-03 |
| 202032_s_at  | MAN2A2     | 0.618 | 1.54 | 9.41E-08 | 4.16E-06 |
| 227877_at    | ANXA2R     | 0.618 | 1.53 | 1.18E-06 | 3.22E-05 |
| 214735_at    | IPCEF1     | 0.618 | 1.53 | 1.07E-05 | 1.90E-04 |
| 213245_at    | ADCY1      | 0.618 | 1.53 | 7.82E-04 | 5.34E-03 |
| 229631_at    | DNHD1      | 0.618 | 1.53 | 1.31E-04 | 1.35E-03 |
| 233083_at    | MTHFD2L    | 0.618 | 1.53 | 1.01E-05 | 1.81E-04 |
| 229450_at    | IFIT3      | 0.618 | 1.53 | 1.13E-04 | 1.20E-03 |
| 238454_at    | ZNF540     | 0.617 | 1.53 | 6.51E-06 | 1.28E-04 |
| 204685_s_at  | ATP2B2     | 0.617 | 1.53 | 3.89E-04 | 3.13E-03 |
| 219033_at    | PARP8      | 0.617 | 1.53 | 9.41E-08 | 4.16E-06 |
| 211883_x_at  | CEACAM1    | 0.617 | 1.53 | 4.34E-06 | 9.24E-05 |
| 208268_at    | ADAM28     | 0.616 | 1.53 | 1.35E-05 | 2.29E-04 |
| 235639_at    | CDH19      | 0.616 | 1.53 | 3.43E-04 | 2.84E-03 |
| 209245_s_at  | KIF1C      | 0.616 | 1.53 | 2.67E-05 | 3.93E-04 |
| 239349_at    | C1QTNF7    | 0.615 | 1.53 | 4.30E-03 | 1.95E-02 |
| 227733_at    | TMEM63C    | 0.615 | 1.53 | 3.64E-04 | 2.97E-03 |
| 38149_at     | ARHGAP25   | 0.615 | 1.53 | 5.80E-08 | 2.87E-06 |
| 89977_at     | ACSM5      | 0.615 | 1.53 | 1.70E-03 | 9.70E-03 |
| 224583_at    | COTL1      | 0.615 | 1.53 | 2.50E-04 | 2.23E-03 |
| 217630_at    | ANGEL2     | 0.614 | 1.53 | 8.28E-04 | 5.60E-03 |
| 204821_at    | BTN3A3     | 0.614 | 1.53 | 2.69E-06 | 6.24E-05 |
| 231261_at    | CATSPERG   | 0.614 | 1.53 | 4.51E-05 | 5.87E-04 |

|             |          |       |      |          |          |
|-------------|----------|-------|------|----------|----------|
| 235515_at   | SYNE4    | 0.614 | 1.53 | 1.01E-03 | 6.58E-03 |
| 230673_at   | PKHD1L1  | 0.613 | 1.53 | 4.73E-05 | 6.10E-04 |
| 206991_s_at | CCR5     | 0.613 | 1.53 | 4.16E-06 | 8.93E-05 |
| 235518_at   | SLC8A1   | 0.613 | 1.53 | 6.34E-05 | 7.67E-04 |
| 34210_at    | CD52     | 0.613 | 1.53 | 2.73E-04 | 2.39E-03 |
| 229687_s_at | PRDM11   | 0.613 | 1.53 | 2.53E-04 | 2.26E-03 |
| 240806_at   | RPL15    | 0.613 | 1.53 | 6.80E-07 | 2.06E-05 |
| 236360_at   | FLJ42875 | 0.613 | 1.53 | 4.47E-04 | 3.48E-03 |
| 206120_at   | CD33     | 0.613 | 1.53 | 2.19E-05 | 3.35E-04 |
| 229175_at   | SMYD4    | 0.612 | 1.53 | 4.32E-07 | 1.42E-05 |
| 236465_at   | RNF175   | 0.612 | 1.53 | 5.27E-05 | 6.66E-04 |
| 235199_at   | RNF125   | 0.612 | 1.53 | 1.64E-10 | 2.17E-08 |
| 219773_at   | NOX4     | 0.611 | 1.53 | 3.91E-04 | 3.15E-03 |
| 229002_at   | FAM69B   | 0.61  | 1.53 | 1.47E-02 | 4.89E-02 |
| 227015_at   | ASPHD2   | 0.61  | 1.53 | 2.98E-04 | 2.56E-03 |
| 227344_at   | IKZF1    | 0.61  | 1.53 | 2.89E-05 | 4.18E-04 |
| 223694_at   | TRIM7    | 0.61  | 1.53 | 2.51E-04 | 2.24E-03 |
| 226745_at   | CYP4V2   | 0.61  | 1.53 | 1.57E-04 | 1.55E-03 |
| 227196_at   | RHPN2    | 0.609 | 1.53 | 1.24E-02 | 4.31E-02 |
| 202192_s_at | GAS7     | 0.609 | 1.53 | 5.06E-11 | 8.27E-09 |
| 1558177_at  | TMEM229B | 0.609 | 1.53 | 4.37E-06 | 9.29E-05 |
| 214147_at   | MROH7    | 0.609 | 1.53 | 2.18E-03 | 1.18E-02 |
| 243403_x_at | CPM      | 0.609 | 1.53 | 2.87E-06 | 6.59E-05 |
| 226610_at   | CENPV    | 0.609 | 1.52 | 9.30E-05 | 1.03E-03 |
| 227610_at   | TSPAN11  | 0.609 | 1.52 | 6.72E-04 | 4.75E-03 |
| 213822_s_at | UBE3B    | 0.608 | 1.52 | 3.52E-03 | 1.68E-02 |
| 222123_s_at | HIF3A    | 0.608 | 1.52 | 1.71E-04 | 1.66E-03 |
| 207067_s_at | HDC      | 0.608 | 1.52 | 5.61E-03 | 2.39E-02 |
| 1556346_at  | COTL1    | 0.608 | 1.52 | 8.71E-06 | 1.61E-04 |
| 230836_at   | ST8SIA4  | 0.608 | 1.52 | 1.33E-06 | 3.54E-05 |
| 226553_at   | TMPRSS2  | 0.607 | 1.52 | 8.71E-03 | 3.30E-02 |
| 206157_at   | PTX3     | 0.607 | 1.52 | 2.21E-04 | 2.03E-03 |
| 205447_s_at | MAP3K12  | 0.607 | 1.52 | 7.83E-05 | 9.11E-04 |
| 205904_at   | MICA     | 0.607 | 1.52 | 7.73E-06 | 1.47E-04 |
| 209816_at   | PTCH1    | 0.606 | 1.52 | 4.00E-03 | 1.85E-02 |
| 207443_at   | NR2E1    | 0.606 | 1.52 | 3.75E-04 | 3.05E-03 |
| 238545_at   | BRD7     | 0.606 | 1.52 | 2.32E-03 | 1.23E-02 |
| 239929_at   | PM20D1   | 0.606 | 1.52 | 2.23E-04 | 2.05E-03 |
| 243602_at   | MGC40069 | 0.605 | 1.52 | 3.82E-05 | 5.18E-04 |
| 241456_at   | FAM78B   | 0.605 | 1.52 | 2.92E-04 | 2.52E-03 |
| 227178_at   | CELF2    | 0.604 | 1.52 | 1.68E-05 | 2.74E-04 |
| 205518_s_at | CMAHP    | 0.604 | 1.52 | 2.02E-04 | 1.90E-03 |
| 233111_at   | PTCSC1   | 0.604 | 1.52 | 5.53E-06 | 1.12E-04 |

|              |           |       |      |          |          |
|--------------|-----------|-------|------|----------|----------|
| 227702_at    | CYP4X1    | 0.604 | 1.52 | 1.48E-05 | 2.47E-04 |
| 211776_s_at  | EPB41L3   | 0.604 | 1.52 | 2.02E-06 | 4.93E-05 |
| 216237_s_at  | MCM5      | 0.604 | 1.52 | 2.19E-04 | 2.02E-03 |
| 240512_x_at  | KCTD4     | 0.603 | 1.52 | 1.42E-03 | 8.51E-03 |
| 220646_s_at  | KLRF1     | 0.603 | 1.52 | 6.49E-04 | 4.63E-03 |
| 1558934_a_at | GTF2H5    | 0.603 | 1.52 | 5.19E-04 | 3.89E-03 |
| 221218_s_at  | TPK1      | 0.603 | 1.52 | 1.44E-07 | 5.83E-06 |
| 227803_at    | ENPP5     | 0.603 | 1.52 | 3.60E-03 | 1.71E-02 |
| 202638_s_at  | ICAM1     | 0.603 | 1.52 | 1.49E-04 | 1.49E-03 |
| 205484_at    | SIT1      | 0.602 | 1.52 | 3.24E-05 | 4.55E-04 |
| 242957_at    | VWCE      | 0.601 | 1.52 | 5.32E-04 | 3.96E-03 |
| 206695_x_at  | ZNF43     | 0.6   | 1.52 | 1.72E-06 | 4.32E-05 |
| 228177_at    | CREBBP    | 0.6   | 1.52 | 1.54E-04 | 1.53E-03 |
| 202637_s_at  | ICAM1     | 0.6   | 1.52 | 7.46E-07 | 2.22E-05 |
| 204639_at    | ADA       | 0.6   | 1.52 | 3.57E-04 | 2.93E-03 |
| 1569225_a_at | SCML4     | 0.599 | 1.52 | 1.96E-04 | 1.86E-03 |
| 243027_at    | IGSF5     | 0.599 | 1.51 | 1.49E-03 | 8.80E-03 |
| 240430_at    | KCMF1     | 0.598 | 1.51 | 2.88E-05 | 4.17E-04 |
| 202357_s_at  | CFB       | 0.598 | 1.51 | 7.71E-05 | 9.00E-04 |
| 228802_at    | RBPMS2    | 0.598 | 1.51 | 2.36E-03 | 1.24E-02 |
| 223211_at    | HACL1     | 0.598 | 1.51 | 8.39E-05 | 9.61E-04 |
| 232001_at    | PRKCQ-AS1 | 0.598 | 1.51 | 5.47E-03 | 2.34E-02 |
| 234841_x_at  | OBP2A     | 0.597 | 1.51 | 3.65E-05 | 4.99E-04 |
| 230457_at    | TMEM242   | 0.597 | 1.51 | 1.64E-04 | 1.61E-03 |
| 207317_s_at  | CASQ2     | 0.597 | 1.51 | 1.24E-02 | 4.30E-02 |
| 213750_at    | RSL1D1    | 0.596 | 1.51 | 2.42E-06 | 5.73E-05 |
| 230751_at    | WNT4      | 0.596 | 1.51 | 1.27E-03 | 7.82E-03 |
| 238977_at    | MCM6      | 0.596 | 1.51 | 1.44E-05 | 2.42E-04 |
| 235173_at    | MBNL1-AS1 | 0.595 | 1.51 | 5.06E-03 | 2.21E-02 |
| 205081_at    | CRIP1     | 0.595 | 1.51 | 4.45E-05 | 5.80E-04 |
| 209933_s_at  | CD300A    | 0.595 | 1.51 | 2.55E-05 | 3.79E-04 |
| 218126_at    | RMDN3     | 0.595 | 1.51 | 4.75E-06 | 9.92E-05 |
| 229039_at    | SYN2      | 0.595 | 1.51 | 9.15E-04 | 6.08E-03 |
| 227138_at    | CRTAP     | 0.594 | 1.51 | 2.19E-07 | 8.16E-06 |
| 60471_at     | RIN3      | 0.594 | 1.51 | 2.57E-08 | 1.45E-06 |
| 221805_at    | NEFL      | 0.594 | 1.51 | 4.46E-04 | 3.48E-03 |
| 227606_s_at  | STAMBPL1  | 0.594 | 1.51 | 1.02E-06 | 2.86E-05 |
| 239425_at    | DCUN1D5   | 0.594 | 1.51 | 2.48E-05 | 3.72E-04 |
| 232662_x_at  | FAM213A   | 0.594 | 1.51 | 3.75E-08 | 1.97E-06 |
| 231562_at    | APOC2     | 0.594 | 1.51 | 4.95E-06 | 1.03E-04 |
| 227753_at    | TMEM139   | 0.593 | 1.51 | 1.01E-03 | 6.59E-03 |
| 203320_at    | SH2B3     | 0.593 | 1.51 | 2.92E-06 | 6.69E-05 |

|                  |                                                |        |      |          |          |
|------------------|------------------------------------------------|--------|------|----------|----------|
| 243099_at        | NFAM1                                          | 0.593  | 1.51 | 2.45E-08 | 1.39E-06 |
| 216250_s_at      | LPXN                                           | 0.592  | 1.51 | 1.94E-08 | 1.13E-06 |
| 226805_at        | FITM2                                          | 0.592  | 1.51 | 1.46E-05 | 2.45E-04 |
| 224162_s_at      | FBXO31                                         | 0.592  | 1.51 | 4.12E-06 | 8.88E-05 |
| 212827_at        | IGHM                                           | 0.592  | 1.51 | 5.06E-03 | 2.21E-02 |
| 236309_x_at      | ZMIZ2                                          | 0.592  | 1.51 | 4.32E-06 | 9.21E-05 |
| 213837_at        | L3MBTL1                                        | 0.592  | 1.51 | 4.64E-06 | 9.75E-05 |
| 244629_s_at      | PDPK1                                          | 0.592  | 1.51 | 1.98E-03 | 1.09E-02 |
| 217521_at        | HAL                                            | 0.592  | 1.51 | 7.39E-03 | 2.93E-02 |
| 226992_at        | NOSTRIN                                        | 0.592  | 1.51 | 4.33E-03 | 1.96E-02 |
| 1561589_a_a<br>t | NBEAL1                                         | 0.592  | 1.51 | 3.12E-04 | 2.64E-03 |
| 230802_at        | ARHGAP24                                       | 0.591  | 1.51 | 1.67E-03 | 9.58E-03 |
| 230780_at        | LINC00886                                      | 0.591  | 1.51 | 7.95E-04 | 5.41E-03 |
| 1563088_a_a<br>t | LOC284837                                      | 0.591  | 1.51 | 2.88E-04 | 2.50E-03 |
| 205114_s_at      | CCL3 /// CCL3L1 /// CCL3L3 ///<br>LOC101060267 | 0.59   | 1.5  | 2.93E-04 | 2.53E-03 |
| 212091_s_at      | COL6A1                                         | 0.589  | 1.5  | 4.84E-06 | 1.01E-04 |
| 237748_at        | SCGB2B2                                        | 0.589  | 1.5  | 1.15E-02 | 4.07E-02 |
| 206804_at        | CD3G                                           | 0.589  | 1.5  | 1.11E-04 | 1.19E-03 |
| 231577_s_at      | GBP1                                           | 0.589  | 1.5  | 1.14E-03 | 7.17E-03 |
| 212580_at        | CAST                                           | 0.589  | 1.5  | 3.09E-04 | 2.62E-03 |
| 1560762_at       | LOC285972                                      | 0.588  | 1.5  | 1.24E-03 | 7.66E-03 |
| 203260_at        | HDDC2                                          | 0.588  | 1.5  | 1.45E-03 | 8.63E-03 |
| 223522_at        | MIR600 /// MIR600HG                            | 0.588  | 1.5  | 1.32E-03 | 8.03E-03 |
| 232155_at        | RNF213                                         | 0.588  | 1.5  | 6.41E-05 | 7.74E-04 |
| 224856_at        | FKBP5                                          | 0.587  | 1.5  | 3.95E-04 | 3.17E-03 |
| 1558770_a_a<br>t | PIK3R6                                         | 0.587  | 1.5  | 2.93E-03 | 1.47E-02 |
| 227396_at        | PTPRJ                                          | 0.587  | 1.5  | 1.98E-06 | 4.84E-05 |
| 239074_at        | GRAPL                                          | 0.586  | 1.5  | 7.47E-04 | 5.16E-03 |
| 220326_s_at      | ARHGEF40                                       | 0.586  | 1.5  | 2.98E-05 | 4.30E-04 |
| 226702_at        | CMPK2                                          | 0.586  | 1.5  | 4.00E-04 | 3.21E-03 |
| 205841_at        | JAK2                                           | 0.586  | 1.5  | 2.55E-06 | 5.97E-05 |
| 228677_s_at      | RASAL3                                         | 0.585  | 1.5  | 4.16E-06 | 8.93E-05 |
| 227749_at        | POU2F2                                         | 0.585  | 1.5  | 1.60E-05 | 2.63E-04 |
| 228984_at        | CARNS1                                         | 0.585  | 1.5  | 3.45E-07 | 1.18E-05 |
| 225478_at        | MFHAS1                                         | -0.585 | -1.5 | 2.01E-08 | 1.17E-06 |
| 209496_at        | RARRES2                                        | -0.586 | -1.5 | 1.95E-04 | 1.85E-03 |
| 1556204_a_a<br>t | ZNF814                                         | -0.586 | -1.5 | 3.51E-04 | 2.89E-03 |
| 210074_at        | CTSL2                                          | -0.587 | -1.5 | 1.49E-03 | 8.80E-03 |
| 218929_at        | CDKN2AIP                                       | -0.587 | -1.5 | 6.17E-12 | 1.39E-09 |
| 228284_at        | TLE1                                           | -0.587 | -1.5 | 2.05E-05 | 3.18E-04 |
| 209457_at        | DUSP5                                          | -0.587 | -1.5 | 2.55E-05 | 3.79E-04 |

|              |                   |        |       |          |          |
|--------------|-------------------|--------|-------|----------|----------|
| 234923_at    | RALGAPA1          | -0.587 | -1.5  | 9.12E-04 | 6.06E-03 |
| 232579_at    | LOC100134229      | -0.588 | -1.5  | 2.84E-06 | 6.53E-05 |
| 219687_at    | HHAT              | -0.588 | -1.5  | 2.89E-08 | 1.61E-06 |
| 232304_at    | PELI1             | -0.588 | -1.5  | 3.58E-03 | 1.70E-02 |
| 1569126_at   | CCNC              | -0.588 | -1.5  | 8.21E-04 | 5.56E-03 |
| 212686_at    | PPM1H             | -0.588 | -1.5  | 2.62E-06 | 6.12E-05 |
| 214036_at    | EFNA5             | -0.588 | -1.5  | 4.81E-08 | 2.43E-06 |
| 226541_at    | FBXO30            | -0.589 | -1.5  | 1.68E-07 | 6.56E-06 |
| 202458_at    | PRSS23            | -0.589 | -1.5  | 2.42E-06 | 5.73E-05 |
| 220431_at    | TMPRSS11E         | -0.589 | -1.5  | 6.82E-03 | 2.76E-02 |
| 205138_s_at  | UST               | -0.589 | -1.5  | 6.55E-09 | 4.53E-07 |
| 217787_s_at  | GALNT2            | -0.589 | -1.5  | 2.30E-09 | 1.90E-07 |
| 242786_at    | SBF2-AS1          | -0.59  | -1.51 | 5.36E-06 | 1.09E-04 |
| 223539_s_at  | SERF1A /// SERF1B | -0.59  | -1.51 | 8.49E-05 | 9.67E-04 |
| 219271_at    | GALNT14           | -0.59  | -1.51 | 1.47E-07 | 5.92E-06 |
| 205586_x_at  | VGf               | -0.591 | -1.51 | 2.01E-10 | 2.54E-08 |
| 236371_s_at  | TGS1              | -0.591 | -1.51 | 2.63E-03 | 1.36E-02 |
| 202272_s_at  | FBXO28            | -0.592 | -1.51 | 1.65E-07 | 6.48E-06 |
| 232322_x_at  | STARD10           | -0.592 | -1.51 | 7.55E-07 | 2.24E-05 |
| 226077_at    | RNF145            | -0.592 | -1.51 | 1.21E-08 | 7.65E-07 |
| 229093_at    | NOS3              | -0.592 | -1.51 | 1.53E-06 | 3.94E-05 |
| 1553672_at   | ENAH              | -0.593 | -1.51 | 4.30E-09 | 3.21E-07 |
| 208141_s_at  | DOHH              | -0.593 | -1.51 | 2.03E-06 | 4.96E-05 |
| 210716_s_at  | CLIP1             | -0.593 | -1.51 | 1.93E-04 | 1.83E-03 |
| 201167_x_at  | ARHGDI4           | -0.593 | -1.51 | 1.00E-04 | 1.09E-03 |
| 209162_s_at  | PRPF4             | -0.594 | -1.51 | 5.99E-06 | 1.19E-04 |
| 1553185_at   | RASEF             | -0.594 | -1.51 | 2.09E-05 | 3.23E-04 |
| 1553425_at   | WDR65             | -0.594 | -1.51 | 2.02E-10 | 2.54E-08 |
| 209118_s_at  | TUBA1A            | -0.594 | -1.51 | 1.16E-09 | 1.10E-07 |
| 202290_at    | PDAP1             | -0.594 | -1.51 | 7.82E-07 | 2.31E-05 |
| 226071_at    | ADAMTSL4          | -0.595 | -1.51 | 4.78E-04 | 3.66E-03 |
| 1558540_s_at |                   |        |       |          |          |
| t            | SLC2A11           | -0.595 | -1.51 | 5.67E-08 | 2.82E-06 |
| 219775_s_at  | CPLX3             | -0.595 | -1.51 | 2.03E-07 | 7.68E-06 |
| 212570_at    | ENDOD1            | -0.595 | -1.51 | 7.26E-05 | 8.56E-04 |
| 214697_s_at  | PTBP3             | -0.596 | -1.51 | 7.81E-05 | 9.08E-04 |
| 202207_at    | ARL4C             | -0.596 | -1.51 | 1.24E-07 | 5.16E-06 |
| 226590_at    | ZNF618            | -0.598 | -1.51 | 7.02E-05 | 8.34E-04 |
| 227032_at    | PLXNA2            | -0.598 | -1.51 | 6.93E-08 | 3.29E-06 |
| 213999_at    | YIPF4             | -0.598 | -1.51 | 1.63E-05 | 2.67E-04 |
| 228485_s_at  | SLC44A1           | -0.598 | -1.51 | 1.79E-06 | 4.46E-05 |
| 213087_s_at  | EEF1D             | -0.599 | -1.51 | 6.20E-04 | 4.47E-03 |
| 206116_s_at  | TPM1              | -0.599 | -1.51 | 9.40E-04 | 6.20E-03 |

|                  |                      |        |       |          |          |
|------------------|----------------------|--------|-------|----------|----------|
| 213096_at        | TMCC2                | -0.599 | -1.51 | 1.62E-09 | 1.42E-07 |
| 243910_x_at      | CAND1                | -0.599 | -1.52 | 4.55E-03 | 2.04E-02 |
| 206196_s_at      | RUNDC3A              | -0.6   | -1.52 | 1.18E-05 | 2.05E-04 |
| 1568126_at       | ANXA2                | -0.602 | -1.52 | 2.27E-04 | 2.07E-03 |
| 226592_at        | ZNF618               | -0.602 | -1.52 | 1.03E-07 | 4.47E-06 |
| 228360_at        | LYPD6B               | -0.602 | -1.52 | 1.57E-09 | 1.37E-07 |
| 218113_at        | TMEM2                | -0.603 | -1.52 | 7.17E-08 | 3.39E-06 |
| 205157_s_at      | JUP /// KRT17        | -0.603 | -1.52 | 5.25E-05 | 6.64E-04 |
| 213476_x_at      | TUBB3                | -0.604 | -1.52 | 8.60E-10 | 8.57E-08 |
| 239355_at        | GMCL1                | -0.605 | -1.52 | 2.12E-11 | 3.96E-09 |
| 210954_s_at      | TSC22D2              | -0.605 | -1.52 | 4.12E-08 | 2.13E-06 |
| 224559_at        | MALAT1               | -0.605 | -1.52 | 1.97E-04 | 1.87E-03 |
| 203692_s_at      | E2F3                 | -0.605 | -1.52 | 5.31E-05 | 6.70E-04 |
| 202461_at        | EIF2B2               | -0.605 | -1.52 | 2.14E-09 | 1.78E-07 |
| 232249_at        | FMNL3                | -0.607 | -1.52 | 5.55E-04 | 4.10E-03 |
| 241245_at        | SRSF4                | -0.607 | -1.52 | 4.80E-03 | 2.12E-02 |
| 217080_s_at      | HOMER2               | -0.607 | -1.52 | 2.90E-09 | 2.32E-07 |
| 203707_at        | LINC00921 /// ZNF263 | -0.608 | -1.52 | 4.31E-10 | 4.84E-08 |
| 232168_x_at      | MACF1                | -0.608 | -1.52 | 2.33E-04 | 2.12E-03 |
| 213344_s_at      | H2AFX                | -0.608 | -1.52 | 9.32E-08 | 4.13E-06 |
| 212098_at        | MGAT5                | -0.609 | -1.52 | 3.27E-13 | 1.11E-10 |
| 207511_s_at      | CNPPD1               | -0.609 | -1.53 | 2.11E-07 | 7.92E-06 |
| 213887_s_at      | POLR2E               | -0.609 | -1.53 | 1.74E-06 | 4.36E-05 |
| 201848_s_at      | BNIP3                | -0.609 | -1.53 | 1.66E-10 | 2.17E-08 |
| 1554572_a_a<br>t | SUV39H2              | -0.61  | -1.53 | 4.11E-08 | 2.13E-06 |
| 212662_at        | PVR                  | -0.61  | -1.53 | 1.06E-05 | 1.89E-04 |
| 225830_at        | PDZD8                | -0.61  | -1.53 | 2.33E-07 | 8.56E-06 |
| 206543_at        | SMARCA2              | -0.61  | -1.53 | 2.02E-06 | 4.92E-05 |
| 228553_at        | ENAH                 | -0.61  | -1.53 | 5.66E-05 | 7.03E-04 |
| 207038_at        | SLC16A6              | -0.61  | -1.53 | 2.70E-05 | 3.97E-04 |
| 211571_s_at      | VCAN                 | -0.611 | -1.53 | 2.91E-04 | 2.52E-03 |
| 1567107_s_a<br>t | TPM4                 | -0.611 | -1.53 | 8.73E-06 | 1.62E-04 |
| 200664_s_at      | DNAJB1               | -0.612 | -1.53 | 1.37E-08 | 8.52E-07 |
| 203705_s_at      | FZD7                 | -0.612 | -1.53 | 8.83E-05 | 9.97E-04 |
| 228699_at        | NRP2                 | -0.613 | -1.53 | 5.94E-05 | 7.29E-04 |
| 214359_s_at      | HSP90AB1             | -0.613 | -1.53 | 4.95E-03 | 2.17E-02 |
| 224036_s_at      | LMBR1                | -0.614 | -1.53 | 3.55E-05 | 4.88E-04 |
| 211793_s_at      | ABI2                 | -0.614 | -1.53 | 7.15E-10 | 7.34E-08 |
| 210419_at        | BARX2                | -0.614 | -1.53 | 9.53E-09 | 6.16E-07 |
| 220456_at        | SPTLC3               | -0.614 | -1.53 | 3.31E-08 | 1.79E-06 |
| 218861_at        | RNF25                | -0.614 | -1.53 | 2.24E-07 | 8.31E-06 |
| 201939_at        | PLK2                 | -0.615 | -1.53 | 1.10E-05 | 1.94E-04 |



|             |                                |        |       |          |          |
|-------------|--------------------------------|--------|-------|----------|----------|
| 227461_at   | STON2                          | -0.616 | -1.53 | 1.10E-09 | 1.06E-07 |
| 244682_at   | CAMSAP1                        | -0.616 | -1.53 | 7.40E-04 | 5.12E-03 |
| 205195_at   | AP1S1                          | -0.616 | -1.53 | 1.20E-04 | 1.26E-03 |
| 240144_at   | DNASE1                         | -0.616 | -1.53 | 1.68E-04 | 1.63E-03 |
| 207112_s_at | GAB1                           | -0.617 | -1.53 | 1.89E-07 | 7.27E-06 |
| 222164_at   | FGFR1                          | -0.618 | -1.53 | 8.62E-07 | 2.48E-05 |
| 219648_at   | MREG                           | -0.618 | -1.53 | 1.35E-17 | 3.85E-14 |
| 238513_at   | PRRG4                          | -0.618 | -1.53 | 5.43E-05 | 6.81E-04 |
| 242592_at   | GPR137C                        | -0.618 | -1.53 | 4.08E-06 | 8.83E-05 |
| 1558577_at  | LOC148709                      | -0.618 | -1.53 | 5.40E-10 | 5.84E-08 |
| 208908_s_at | CAST                           | -0.619 | -1.54 | 8.62E-08 | 3.90E-06 |
| 208002_s_at | ACOT7                          | -0.619 | -1.54 | 1.04E-10 | 1.53E-08 |
| 207764_s_at | HIPK3                          | -0.619 | -1.54 | 2.02E-07 | 7.65E-06 |
| 215066_at   | PTPRF                          | -0.62  | -1.54 | 1.66E-03 | 9.51E-03 |
| 229290_at   | DAPL1                          | -0.62  | -1.54 | 8.83E-10 | 8.75E-08 |
| 203018_s_at | SSX2IP                         | -0.622 | -1.54 | 6.07E-06 | 1.21E-04 |
| 203790_s_at | HRSP12                         | -0.623 | -1.54 | 1.33E-06 | 3.54E-05 |
| 212365_at   | MYO1B                          | -0.623 | -1.54 | 7.69E-08 | 3.56E-06 |
| 1565939_at  | C5orf22                        | -0.624 | -1.54 | 4.43E-04 | 3.46E-03 |
| 52651_at    | COL8A2                         | -0.625 | -1.54 | 8.69E-07 | 2.50E-05 |
| 202345_s_at | FABP5 /// LOC101060453         | -0.625 | -1.54 | 1.13E-08 | 7.19E-07 |
| 1558732_at  | MAP4K4                         | -0.628 | -1.54 | 4.28E-03 | 1.95E-02 |
| 210417_s_at | PI4KB                          | -0.628 | -1.55 | 9.25E-05 | 1.03E-03 |
| 206156_at   | GJB5                           | -0.629 | -1.55 | 2.93E-04 | 2.53E-03 |
|             | LOC101059961 ///               |        |       |          |          |
|             | LOC101060202 ///               |        |       |          |          |
|             | LOC101060226 ///               |        |       |          |          |
|             | LOC101060362 ///               |        |       |          |          |
|             | LOC101060684 /// NBPF1 ///     |        |       |          |          |
|             | NBPF10 /// NBPF11 /// NBPF12   |        |       |          |          |
|             | /// NBPF24 /// NBPF7 /// NBPF8 |        |       |          |          |
| 1569519_at  | /// NBPF9                      | -0.63  | -1.55 | 1.77E-05 | 2.84E-04 |
| 204117_at   | PREP                           | -0.631 | -1.55 | 9.28E-09 | 6.02E-07 |
|             | CBWD1 /// CBWD3 /// CBWD5      |        |       |          |          |
|             | /// CBWD6 /// CBWD7 ///        |        |       |          |          |
|             | LOC100653334 ///               |        |       |          |          |
| 226193_x_at | LOC101060578                   | -0.631 | -1.55 | 3.31E-06 | 7.39E-05 |
| 216554_s_at | ENO1                           | -0.631 | -1.55 | 1.49E-03 | 8.79E-03 |
| 222757_s_at | ZAK                            | -0.632 | -1.55 | 4.28E-04 | 3.37E-03 |
| 1555225_at  | C1orf43                        | -0.632 | -1.55 | 9.60E-06 | 1.74E-04 |
| 209882_at   | RIT1                           | -0.633 | -1.55 | 1.28E-06 | 3.42E-05 |
| 221664_s_at | F11R                           | -0.633 | -1.55 | 1.65E-06 | 4.20E-05 |
| 37408_at    | MRC2                           | -0.634 | -1.55 | 1.50E-09 | 1.34E-07 |
| 214877_at   | CDKAL1                         | -0.634 | -1.55 | 1.53E-04 | 1.52E-03 |
| 222701_s_at | CHCHD7                         | -0.634 | -1.55 | 1.64E-09 | 1.42E-07 |
| 220085_at   | HELLS                          | -0.634 | -1.55 | 3.66E-03 | 1.73E-02 |
| 206367_at   | REN                            | -0.634 | -1.55 | 1.29E-05 | 2.22E-04 |

|              |           |        |       |          |          |
|--------------|-----------|--------|-------|----------|----------|
| 224940_s_at  | PAPPA     | -0.635 | -1.55 | 2.64E-06 | 6.15E-05 |
| 215646_s_at  | VCAN      | -0.635 | -1.55 | 1.42E-03 | 8.51E-03 |
| 223925_s_at  | MTPN      | -0.635 | -1.55 | 1.24E-03 | 7.68E-03 |
| 1553186_x_at | RASEF     | -0.635 | -1.55 | 2.49E-05 | 3.74E-04 |
| 238621_at    | FMN1      | -0.635 | -1.55 | 1.12E-05 | 1.97E-04 |
| 226499_at    | NRARP     | -0.635 | -1.55 | 7.15E-08 | 3.38E-06 |
| 203980_at    | FABP4     | -0.636 | -1.55 | 1.10E-02 | 3.93E-02 |
| 227602_at    | RAB7A     | -0.636 | -1.55 | 1.99E-03 | 1.09E-02 |
| 215028_at    | SEMA6A    | -0.637 | -1.56 | 4.43E-04 | 3.46E-03 |
| 203243_s_at  | PDLIM5    | -0.637 | -1.56 | 8.58E-03 | 3.26E-02 |
| 215807_s_at  | PLXNB1    | -0.637 | -1.56 | 5.38E-05 | 6.76E-04 |
| 231259_s_at  | CCND2     | -0.639 | -1.56 | 2.68E-04 | 2.36E-03 |
| 203722_at    | ALDH4A1   | -0.64  | -1.56 | 4.08E-07 | 1.35E-05 |
| 244755_at    | XPR1      | -0.64  | -1.56 | 8.68E-05 | 9.84E-04 |
| 208653_s_at  | CD164     | -0.64  | -1.56 | 1.49E-06 | 3.85E-05 |
| 218192_at    | IP6K2     | -0.641 | -1.56 | 4.60E-06 | 9.68E-05 |
| 208719_s_at  | DDX17     | -0.641 | -1.56 | 1.26E-06 | 3.38E-05 |
| 205117_at    | FGF1      | -0.641 | -1.56 | 3.36E-03 | 1.62E-02 |
| 222348_at    | MAST4     | -0.641 | -1.56 | 7.71E-06 | 1.47E-04 |
| 213577_at    | SQLE      | -0.641 | -1.56 | 3.54E-05 | 4.87E-04 |
| 1555401_at   | SOHLH2    | -0.641 | -1.56 | 1.30E-09 | 1.20E-07 |
| 1559658_at   | KATNBL1   | -0.642 | -1.56 | 2.69E-05 | 3.96E-04 |
| 224762_at    | SERINC2   | -0.643 | -1.56 | 1.74E-09 | 1.49E-07 |
| 229817_at    | ZNF608    | -0.643 | -1.56 | 1.30E-07 | 5.38E-06 |
| 238028_at    | C6orf132  | -0.643 | -1.56 | 4.10E-07 | 1.35E-05 |
| 212081_x_at  | PRRC2A    | -0.643 | -1.56 | 2.01E-07 | 7.64E-06 |
| 204557_s_at  | DZIP1     | -0.643 | -1.56 | 8.65E-05 | 9.81E-04 |
| 244118_at    | GABRA1    | -0.643 | -1.56 | 8.97E-09 | 5.87E-07 |
| 202089_s_at  | SLC39A6   | -0.643 | -1.56 | 1.10E-05 | 1.94E-04 |
| 222364_at    | SLC44A1   | -0.643 | -1.56 | 4.47E-04 | 3.48E-03 |
| 1564307_a_at | A2ML1     | -0.644 | -1.56 | 9.49E-03 | 3.52E-02 |
| 216086_at    | SV2C      | -0.645 | -1.56 | 3.68E-07 | 1.24E-05 |
| 219671_at    | HPCAL4    | -0.646 | -1.56 | 4.30E-10 | 4.84E-08 |
| 203016_s_at  | SSX2IP    | -0.646 | -1.56 | 6.54E-10 | 6.79E-08 |
| 219340_s_at  | CLN8      | -0.646 | -1.56 | 1.15E-09 | 1.09E-07 |
| 1553226_at   | LINC00052 | -0.646 | -1.57 | 1.23E-06 | 3.32E-05 |
| 221455_s_at  | WNT3      | -0.646 | -1.57 | 2.72E-15 | 2.01E-12 |
| 218484_at    | NDUFA4L2  | -0.647 | -1.57 | 2.31E-04 | 2.10E-03 |
| 227313_at    | CNPY4     | -0.648 | -1.57 | 1.25E-09 | 1.16E-07 |
| 209198_s_at  | SYT11     | -0.648 | -1.57 | 1.00E-04 | 1.10E-03 |
| 1555151_s_at | TDH       | -0.648 | -1.57 | 1.47E-07 | 5.92E-06 |
| 1565717_s_at | FUS       | -0.649 | -1.57 | 1.81E-04 | 1.74E-03 |

|             |                |        |       |          |          |
|-------------|----------------|--------|-------|----------|----------|
| 224325_at   | FZD8           | -0.65  | -1.57 | 1.16E-03 | 7.26E-03 |
| 218834_s_at | TMEM132A       | -0.65  | -1.57 | 6.14E-08 | 2.99E-06 |
| 204148_s_at | POMZP3 /// ZP3 | -0.651 | -1.57 | 9.14E-04 | 6.07E-03 |
| 203221_at   | TLE1           | -0.651 | -1.57 | 2.49E-10 | 3.07E-08 |
| 202341_s_at | TRIM2          | -0.651 | -1.57 | 5.52E-04 | 4.08E-03 |
| 226069_at   | PRICKLE1       | -0.651 | -1.57 | 6.16E-07 | 1.89E-05 |
| 217109_at   | MUC4           | -0.652 | -1.57 | 1.82E-03 | 1.02E-02 |
| 220816_at   | LPAR3          | -0.652 | -1.57 | 5.92E-07 | 1.84E-05 |
| 232865_at   | AFF4           | -0.653 | -1.57 | 1.26E-04 | 1.32E-03 |
| 204903_x_at | ATG4B          | -0.654 | -1.57 | 1.57E-09 | 1.37E-07 |
| 207826_s_at | ID3            | -0.655 | -1.57 | 3.05E-10 | 3.63E-08 |
| 228293_at   | DEPDC7         | -0.655 | -1.57 | 7.99E-09 | 5.36E-07 |
| 236402_at   | BRAF           | -0.655 | -1.57 | 1.04E-06 | 2.91E-05 |
| 229929_at   | SPSB4          | -0.655 | -1.58 | 6.37E-08 | 3.08E-06 |
| 226237_at   | COL8A1         | -0.656 | -1.58 | 6.28E-03 | 2.59E-02 |
| 212144_at   | SUN2           | -0.656 | -1.58 | 2.98E-08 | 1.65E-06 |
| 210929_s_at | AHSG           | -0.656 | -1.58 | 2.35E-07 | 8.61E-06 |
| 236241_at   | MED31          | -0.656 | -1.58 | 7.58E-03 | 2.98E-02 |
| 208650_s_at | CD24           | -0.657 | -1.58 | 7.26E-06 | 1.41E-04 |
| 220317_at   | LRAT           | -0.657 | -1.58 | 2.05E-08 | 1.19E-06 |
| 243496_at   | RAB18          | -0.657 | -1.58 | 6.42E-05 | 7.74E-04 |
| 1563900_at  | FAM83B         | -0.657 | -1.58 | 5.90E-03 | 2.47E-02 |
| 212841_s_at | PPFIBP2        | -0.658 | -1.58 | 1.04E-10 | 1.54E-08 |
| 202744_at   | SLC20A2        | -0.658 | -1.58 | 3.04E-10 | 3.63E-08 |
| 206605_at   | ENDOU          | -0.659 | -1.58 | 7.36E-09 | 5.02E-07 |
| 218916_at   | ZNF768         | -0.66  | -1.58 | 3.09E-07 | 1.08E-05 |
| 204173_at   | MYL6B          | -0.66  | -1.58 | 9.98E-08 | 4.36E-06 |
| 214446_at   | ELL2           | -0.66  | -1.58 | 2.26E-07 | 8.34E-06 |
| 205007_s_at | CIB2           | -0.661 | -1.58 | 6.81E-09 | 4.69E-07 |
| 201229_s_at | ARIH2          | -0.661 | -1.58 | 7.84E-05 | 9.11E-04 |
| 242660_at   | C10orf112      | -0.661 | -1.58 | 4.26E-03 | 1.94E-02 |
| 220482_s_at | SERGEF         | -0.662 | -1.58 | 1.18E-05 | 2.06E-04 |
| 206315_at   | CRLF1          | -0.662 | -1.58 | 7.72E-09 | 5.21E-07 |
| 217897_at   | FXVD6          | -0.663 | -1.58 | 6.59E-05 | 7.92E-04 |
| 41856_at    | UNC5B          | -0.665 | -1.59 | 6.45E-07 | 1.97E-05 |
| 222833_at   | LPCAT2         | -0.665 | -1.59 | 1.30E-05 | 2.22E-04 |
| 212983_at   | HRAS           | -0.666 | -1.59 | 9.12E-08 | 4.06E-06 |
| 213486_at   | COPG2IT1       | -0.667 | -1.59 | 1.42E-03 | 8.49E-03 |
| 204750_s_at | DSC2           | -0.667 | -1.59 | 2.18E-05 | 3.35E-04 |
| 208932_at   | PPP4C          | -0.668 | -1.59 | 7.48E-04 | 5.16E-03 |
| 203634_s_at | CPT1A          | -0.668 | -1.59 | 4.66E-05 | 6.02E-04 |
| 229518_at   | FAM46B         | -0.668 | -1.59 | 5.72E-11 | 9.27E-09 |
| 1552365_at  | SCIN           | -0.668 | -1.59 | 5.21E-04 | 3.90E-03 |

|                  |                           |        |       |          |          |
|------------------|---------------------------|--------|-------|----------|----------|
| 213713_s_at      | GLB1L2                    | -0.669 | -1.59 | 5.14E-08 | 2.58E-06 |
| 228126_x_at      | CTXN1                     | -0.67  | -1.59 | 1.16E-08 | 7.40E-07 |
| 230976_at        | AK8                       | -0.671 | -1.59 | 2.98E-04 | 2.56E-03 |
| 200622_x_at      | CALM1 /// CALM2 /// CALM3 | -0.671 | -1.59 | 1.36E-06 | 3.60E-05 |
| 223468_s_at      | RGMA                      | -0.672 | -1.59 | 2.48E-05 | 3.72E-04 |
| 228329_at        | DAB1                      | -0.673 | -1.59 | 5.13E-03 | 2.23E-02 |
| 214168_s_at      | TJP1                      | -0.673 | -1.59 | 3.23E-07 | 1.12E-05 |
| 201418_s_at      | SOX4                      | -0.673 | -1.59 | 2.36E-04 | 2.13E-03 |
| 230748_at        | SLC16A6                   | -0.673 | -1.59 | 2.21E-07 | 8.22E-06 |
| 230369_at        | GPR161                    | -0.674 | -1.59 | 2.68E-09 | 2.15E-07 |
| 226027_at        | SWI5                      | -0.674 | -1.6  | 5.54E-09 | 3.96E-07 |
| 215817_at        | SERPINB13                 | -0.674 | -1.6  | 8.79E-10 | 8.73E-08 |
| 219229_at        | SLCO3A1                   | -0.674 | -1.6  | 2.61E-11 | 4.71E-09 |
| 206109_at        | FUT1                      | -0.675 | -1.6  | 1.15E-10 | 1.65E-08 |
| 238775_at        | ITFG1                     | -0.676 | -1.6  | 3.10E-04 | 2.63E-03 |
| 233203_at        | ROPN1                     | -0.676 | -1.6  | 5.82E-04 | 4.26E-03 |
| 213069_at        | HEG1                      | -0.677 | -1.6  | 4.01E-09 | 3.05E-07 |
| 213038_at        | RNF19B                    | -0.677 | -1.6  | 3.50E-10 | 4.09E-08 |
| 1559433_at       | APCDD1L-AS1               | -0.678 | -1.6  | 2.56E-04 | 2.27E-03 |
| 220021_at        | TMC7                      | -0.678 | -1.6  | 9.44E-09 | 6.11E-07 |
| 215374_at        | PAPOLA                    | -0.679 | -1.6  | 3.91E-03 | 1.82E-02 |
| 205348_s_at      | DYNC1I1                   | -0.679 | -1.6  | 2.42E-03 | 1.27E-02 |
| 236700_at        | EIF3C                     | -0.679 | -1.6  | 8.10E-03 | 3.12E-02 |
| 219806_s_at      | SMCO4                     | -0.681 | -1.6  | 1.50E-07 | 6.01E-06 |
| 242906_at        | SESN3                     | -0.681 | -1.6  | 9.15E-06 | 1.68E-04 |
| 205732_s_at      | NCOA2                     | -0.681 | -1.6  | 1.97E-07 | 7.53E-06 |
| 226313_at        | C10orf35                  | -0.683 | -1.61 | 9.07E-11 | 1.37E-08 |
| 232348_at        | C18orf8                   | -0.683 | -1.61 | 4.51E-11 | 7.54E-09 |
| 239899_at        | RNF145                    | -0.683 | -1.61 | 8.83E-07 | 2.53E-05 |
| 1554804_a_a<br>t | CLDN19                    | -0.684 | -1.61 | 7.89E-06 | 1.50E-04 |
| 207011_s_at      | PTK7                      | -0.684 | -1.61 | 7.06E-07 | 2.12E-05 |
| 204181_s_at      | ZBTB43                    | -0.684 | -1.61 | 6.19E-03 | 2.56E-02 |
| 223599_at        | TRIM6                     | -0.684 | -1.61 | 1.13E-04 | 1.21E-03 |
| 235057_at        | ITCH                      | -0.684 | -1.61 | 4.96E-03 | 2.18E-02 |
| 228636_at        | BHLHE22                   | -0.685 | -1.61 | 2.57E-04 | 2.28E-03 |
| 1561030_at       | TMC7                      | -0.686 | -1.61 | 6.67E-06 | 1.30E-04 |
| 1559256_at       | MAGI1                     | -0.687 | -1.61 | 5.20E-09 | 3.78E-07 |
| 225105_at        | C12orf75                  | -0.687 | -1.61 | 3.22E-06 | 7.22E-05 |
| 228121_at        | TGFB2                     | -0.688 | -1.61 | 1.08E-05 | 1.92E-04 |
| 222927_s_at      | CPLX3                     | -0.689 | -1.61 | 1.28E-10 | 1.78E-08 |
| 228977_at        | LOC729680                 | -0.689 | -1.61 | 6.12E-06 | 1.21E-04 |
| 223478_at        | TIMM8B                    | -0.69  | -1.61 | 5.90E-06 | 1.18E-04 |

|              |                                                  |        |       |          |          |
|--------------|--------------------------------------------------|--------|-------|----------|----------|
| 204556_s_at  | DZIP1                                            | -0.69  | -1.61 | 4.17E-05 | 5.51E-04 |
| 225718_at    | KIAA1715                                         | -0.691 | -1.61 | 9.55E-03 | 3.53E-02 |
| 229581_at    | ELFN1                                            | -0.691 | -1.61 | 2.34E-06 | 5.58E-05 |
| 210868_s_at  | ELOVL6                                           | -0.691 | -1.61 | 4.55E-09 | 3.35E-07 |
|              | LOC100506303 ///                                 |        |       |          |          |
|              | LOC100653149 ///                                 |        |       |          |          |
|              | LOC101060483 ///<br>LOC400879                    |        |       |          |          |
| 242881_x_at  | ///<br>LOC440157                                 | -0.691 | -1.61 | 5.02E-03 | 2.20E-02 |
| 221539_at    | EIF4EBP1                                         | -0.691 | -1.61 | 4.98E-12 | 1.15E-09 |
| 1565525_x_at | TCP11L2                                          | -0.691 | -1.61 | 3.37E-08 | 1.82E-06 |
| 203779_s_at  | MPZL2                                            | -0.692 | -1.62 | 4.88E-07 | 1.57E-05 |
| 1553352_x_at | ERVW-1                                           | -0.692 | -1.62 | 1.41E-11 | 2.85E-09 |
| 223103_at    | STARD10                                          | -0.692 | -1.62 | 2.31E-08 | 1.32E-06 |
| 213100_at    | UNC5B                                            | -0.692 | -1.62 | 7.17E-07 | 2.15E-05 |
| 226026_at    | DIRC2                                            | -0.693 | -1.62 | 1.86E-11 | 3.59E-09 |
| 201266_at    | TXNRD1                                           | -0.693 | -1.62 | 2.74E-14 | 1.45E-11 |
| 215199_at    | CALD1                                            | -0.695 | -1.62 | 8.70E-06 | 1.61E-04 |
| 239062_at    | TNRC6C-AS1                                       | -0.695 | -1.62 | 2.74E-07 | 9.76E-06 |
| 230254_at    | FAM26E                                           | -0.696 | -1.62 | 5.10E-03 | 2.22E-02 |
| 232914_s_at  | SYTL2                                            | -0.696 | -1.62 | 3.63E-06 | 8.01E-05 |
| 222528_s_at  | SLC25A37                                         | -0.696 | -1.62 | 4.14E-07 | 1.37E-05 |
| 217238_s_at  | ALDOB                                            | -0.696 | -1.62 | 2.22E-07 | 8.23E-06 |
| 231771_at    | GJB6                                             | -0.699 | -1.62 | 1.19E-09 | 1.12E-07 |
| 217871_s_at  | MIF                                              | -0.7   | -1.62 | 8.27E-06 | 1.55E-04 |
| 204761_at    | USP6NL                                           | -0.701 | -1.63 | 9.29E-12 | 2.04E-09 |
| 211672_s_at  | ARPC4                                            | -0.702 | -1.63 | 8.17E-04 | 5.54E-03 |
| 202436_s_at  | CYP1B1                                           | -0.702 | -1.63 | 4.56E-04 | 3.53E-03 |
| 36564_at     | RNF19B                                           | -0.702 | -1.63 | 8.44E-10 | 8.45E-08 |
|              | LOC100134445 ///                                 |        |       |          |          |
|              | LOC100288778 ///<br>WASH1 ///                    |        |       |          |          |
| 1557034_s_at | WASH2P ///<br>WASH3P ///<br>WASH5P ///<br>WASH7P | -0.702 | -1.63 | 1.81E-04 | 1.74E-03 |
| 242583_at    | STON2                                            | -0.703 | -1.63 | 1.07E-08 | 6.88E-07 |
| 209588_at    | EPHB2                                            | -0.703 | -1.63 | 2.25E-06 | 5.39E-05 |
| 222506_at    | LMBR1                                            | -0.704 | -1.63 | 3.71E-05 | 5.04E-04 |
| 202695_s_at  | STK17A                                           | -0.705 | -1.63 | 1.66E-07 | 6.49E-06 |
| 205918_at    | SLC4A3                                           | -0.705 | -1.63 | 8.40E-06 | 1.57E-04 |
| 219869_s_at  | SLC39A8                                          | -0.705 | -1.63 | 5.30E-05 | 6.70E-04 |
| 219976_at    | HOOK1                                            | -0.705 | -1.63 | 1.44E-06 | 3.74E-05 |
| 1558173_x_at | LUZP1                                            | -0.705 | -1.63 | 4.64E-06 | 9.75E-05 |
| 214972_at    | MGEA5                                            | -0.706 | -1.63 | 2.64E-04 | 2.33E-03 |
| 215547_at    | TSC22D2                                          | -0.706 | -1.63 | 6.66E-12 | 1.49E-09 |
| 220011_at    | AUNIP                                            | -0.707 | -1.63 | 3.05E-06 | 6.94E-05 |
| 208978_at    | CRIP2                                            | -0.707 | -1.63 | 6.20E-08 | 3.02E-06 |
| 222420_s_at  | UBE2H                                            | -0.707 | -1.63 | 1.04E-09 | 1.02E-07 |

|              |                        |        |       |          |          |
|--------------|------------------------|--------|-------|----------|----------|
| 37425_g_at   | CCHCR1                 | -0.707 | -1.63 | 1.56E-09 | 1.37E-07 |
| 201860_s_at  | PLAT                   | -0.707 | -1.63 | 9.29E-07 | 2.64E-05 |
| 209873_s_at  | PKP3                   | -0.708 | -1.63 | 7.60E-08 | 3.53E-06 |
| 235367_at    | MYPN                   | -0.708 | -1.63 | 3.90E-13 | 1.27E-10 |
| 242163_at    | THRAP3                 | -0.709 | -1.63 | 1.19E-03 | 7.40E-03 |
| 209280_at    | MRC2                   | -0.71  | -1.64 | 5.42E-11 | 8.82E-09 |
| 215268_at    | KIAA0754               | -0.71  | -1.64 | 1.43E-06 | 3.73E-05 |
| 213439_x_at  | RUNDC3A                | -0.71  | -1.64 | 4.43E-10 | 4.95E-08 |
| 235684_s_at  | SESN3                  | -0.71  | -1.64 | 2.10E-07 | 7.88E-06 |
| 223044_at    | SLC40A1                | -0.711 | -1.64 | 5.90E-12 | 1.34E-09 |
| 238001_at    | KCTD6                  | -0.712 | -1.64 | 5.54E-10 | 5.94E-08 |
| 235977_at    | LONRF2                 | -0.713 | -1.64 | 8.07E-07 | 2.36E-05 |
| 209078_s_at  | TXN2                   | -0.713 | -1.64 | 1.48E-05 | 2.46E-04 |
| 203021_at    | SLPI                   | -0.713 | -1.64 | 2.84E-07 | 1.01E-05 |
| 224397_s_at  | TMTC1                  | -0.714 | -1.64 | 2.98E-06 | 6.81E-05 |
| 213606_s_at  | ARHGDIA                | -0.715 | -1.64 | 2.14E-05 | 3.30E-04 |
| 234925_at    | LINC00917              | -0.715 | -1.64 | 1.88E-08 | 1.11E-06 |
| 202208_s_at  | ARL4C                  | -0.716 | -1.64 | 3.53E-11 | 6.06E-09 |
| 200907_s_at  | PALLD                  | -0.716 | -1.64 | 4.55E-08 | 2.32E-06 |
| 230622_at    | MLLT4                  | -0.717 | -1.64 | 1.76E-11 | 3.42E-09 |
| 1557944_s_at | CTNND1 /// TMX2-CTNND1 | -0.717 | -1.64 | 2.61E-04 | 2.31E-03 |
| 222162_s_at  | ADAMTS1                | -0.717 | -1.64 | 1.42E-06 | 3.72E-05 |
| 204141_at    | TUBB2A                 | -0.718 | -1.65 | 3.13E-14 | 1.60E-11 |
| 201183_s_at  | CHD4                   | -0.719 | -1.65 | 5.91E-06 | 1.18E-04 |
| 227317_at    | LMCD1                  | -0.719 | -1.65 | 6.74E-06 | 1.32E-04 |
| 223278_at    | GJB2                   | -0.721 | -1.65 | 2.26E-09 | 1.88E-07 |
| 225950_at    | SAMD8                  | -0.721 | -1.65 | 7.26E-13 | 2.27E-10 |
| 226494_at    | CAMSAP3                | -0.721 | -1.65 | 1.01E-07 | 4.42E-06 |
| 228527_s_at  | SLC25A37               | -0.722 | -1.65 | 2.18E-08 | 1.26E-06 |
| 200835_s_at  | MAP4                   | -0.722 | -1.65 | 5.59E-04 | 4.12E-03 |
| 214698_at    | PTBP3                  | -0.722 | -1.65 | 2.86E-05 | 4.15E-04 |
| 230464_at    | S1PR5                  | -0.722 | -1.65 | 8.24E-06 | 1.54E-04 |
| 225119_at    | CHMP4B                 | -0.722 | -1.65 | 8.05E-07 | 2.36E-05 |
| 242899_at    | SESN3                  | -0.722 | -1.65 | 4.28E-06 | 9.14E-05 |
| 227443_at    | LURAP1L                | -0.722 | -1.65 | 5.49E-09 | 3.93E-07 |
| 1565759_at   | RPL13                  | -0.724 | -1.65 | 3.35E-08 | 1.81E-06 |
| 1558387_at   | UG0898H09              | -0.725 | -1.65 | 3.09E-04 | 2.62E-03 |
| 210655_s_at  | FOXO3 /// FOXO3B       | -0.725 | -1.65 | 3.88E-07 | 1.29E-05 |
| 1555007_s_at | WDR66                  | -0.725 | -1.65 | 2.90E-08 | 1.61E-06 |
| 210393_at    | LGR5                   | -0.726 | -1.65 | 4.40E-07 | 1.44E-05 |
| 235388_at    | CHD9                   | -0.727 | -1.65 | 3.84E-04 | 3.11E-03 |
| 201981_at    | PAPPA                  | -0.727 | -1.65 | 2.01E-07 | 7.63E-06 |

| HSPA8 /// SNORD14C /// |              |        |       |          |          |
|------------------------|--------------|--------|-------|----------|----------|
| 210338_s_at            | SNORD14D     | -0.729 | -1.66 | 5.85E-04 | 4.27E-03 |
| 1552496_a_at           |              |        |       |          |          |
| t                      | COBL         | -0.729 | -1.66 | 1.33E-06 | 3.52E-05 |
| 205422_s_at            | ITGBL1       | -0.73  | -1.66 | 9.26E-06 | 1.69E-04 |
| 218888_s_at            | NETO2        | -0.73  | -1.66 | 3.90E-06 | 8.51E-05 |
| 230068_s_at            | PEG3-AS1     | -0.73  | -1.66 | 2.43E-07 | 8.82E-06 |
| 209591_s_at            | BMP7         | -0.731 | -1.66 | 1.16E-06 | 3.18E-05 |
| 210910_s_at            | POMZP3       | -0.731 | -1.66 | 1.33E-03 | 8.11E-03 |
| 230830_at              | SLC51B       | -0.732 | -1.66 | 5.07E-10 | 5.56E-08 |
| 208621_s_at            | EZR          | -0.734 | -1.66 | 3.24E-03 | 1.58E-02 |
| 227269_s_at            | RAB40C       | -0.734 | -1.66 | 1.89E-06 | 4.66E-05 |
| 226876_at              | FAM101B      | -0.736 | -1.66 | 6.86E-07 | 2.08E-05 |
| 224218_s_at            | TRPS1        | -0.736 | -1.67 | 1.38E-05 | 2.32E-04 |
| 218368_s_at            | TNFRSF12A    | -0.736 | -1.67 | 1.96E-09 | 1.66E-07 |
| 238789_at              | KANK1        | -0.736 | -1.67 | 5.05E-06 | 1.05E-04 |
| 1570511_at             | ARHGEF10L    | -0.737 | -1.67 | 9.20E-06 | 1.69E-04 |
| 1556037_s_at           |              |        |       |          |          |
| t                      | HHIP         | -0.739 | -1.67 | 3.66E-08 | 1.94E-06 |
| 204736_s_at            | CSPG4        | -0.739 | -1.67 | 9.30E-06 | 1.70E-04 |
| 205635_at              | KALRN        | -0.74  | -1.67 | 3.91E-06 | 8.52E-05 |
| 239136_at              | UNC5B-AS1    | -0.74  | -1.67 | 4.62E-04 | 3.57E-03 |
| 207008_at              | CXCR2        | -0.743 | -1.67 | 3.98E-05 | 5.33E-04 |
| 224595_at              | SLC44A1      | -0.743 | -1.67 | 6.46E-05 | 7.79E-04 |
| 222651_s_at            | TRPS1        | -0.743 | -1.67 | 2.49E-05 | 3.73E-04 |
| 203904_x_at            | CD82         | -0.746 | -1.68 | 1.50E-08 | 9.18E-07 |
| 204657_s_at            | SHB          | -0.746 | -1.68 | 4.85E-09 | 3.54E-07 |
| 219225_at              | PGBD5        | -0.747 | -1.68 | 1.28E-06 | 3.42E-05 |
| 1555730_a_at           |              |        |       |          |          |
| t                      | CFL1         | -0.747 | -1.68 | 4.72E-04 | 3.62E-03 |
| 220203_at              | BMP8A        | -0.749 | -1.68 | 3.25E-12 | 7.96E-10 |
| 212157_at              | SDC2         | -0.75  | -1.68 | 1.66E-06 | 4.21E-05 |
| 220244_at              | LINC00312    | -0.751 | -1.68 | 2.35E-06 | 5.60E-05 |
| 207192_at              | DNASE1L2     | -0.753 | -1.69 | 5.70E-06 | 1.15E-04 |
| 224526_at              | LOC100132319 | -0.754 | -1.69 | 9.54E-03 | 3.53E-02 |
| 219367_s_at            | NRP2         | -0.754 | -1.69 | 2.96E-05 | 4.27E-04 |
| 220067_at              | SPTBN5       | -0.754 | -1.69 | 5.28E-05 | 6.67E-04 |
| 226065_at              | PRICKLE1     | -0.755 | -1.69 | 1.11E-08 | 7.11E-07 |
| 211362_s_at            | SERPINB13    | -0.755 | -1.69 | 4.66E-10 | 5.14E-08 |
| 212154_at              | SDC2         | -0.756 | -1.69 | 2.38E-05 | 3.59E-04 |
| 1555226_s_at           |              |        |       |          |          |
| t                      | C1orf43      | -0.757 | -1.69 | 4.16E-05 | 5.50E-04 |
| 228786_at              | PTCHD3P1     | -0.757 | -1.69 | 5.61E-07 | 1.76E-05 |
| 238593_at              | C11orf80     | -0.757 | -1.69 | 6.42E-03 | 2.64E-02 |
| 220489_s_at            | SERINC2      | -0.758 | -1.69 | 1.34E-07 | 5.54E-06 |
| 219660_s_at            | ATP8A2       | -0.758 | -1.69 | 2.47E-06 | 5.82E-05 |

|              |           |        |       |          |          |
|--------------|-----------|--------|-------|----------|----------|
| 1568954_s_at | C16orf72  | -0.759 | -1.69 | 7.49E-10 | 7.60E-08 |
| 241771_at    | RIMBP2    | -0.759 | -1.69 | 1.02E-07 | 4.44E-06 |
| 214433_s_at  | SELENBP1  | -0.759 | -1.69 | 1.95E-05 | 3.06E-04 |
| 220625_s_at  | ELF5      | -0.76  | -1.69 | 5.64E-06 | 1.14E-04 |
| 202416_at    | DNAJC7    | -0.761 | -1.69 | 1.83E-10 | 2.34E-08 |
| 229900_at    | CD109     | -0.761 | -1.69 | 5.49E-09 | 3.93E-07 |
| 207268_x_at  | ABI2      | -0.761 | -1.7  | 1.76E-13 | 6.70E-11 |
| 216629_at    | SRRM2     | -0.762 | -1.7  | 1.19E-06 | 3.23E-05 |
| 220962_s_at  | PADI1     | -0.764 | -1.7  | 2.16E-11 | 4.02E-09 |
| 1553288_a_at | NYAP1     | -0.764 | -1.7  | 3.43E-07 | 1.17E-05 |
| 1564274_at   | C9orf47   | -0.768 | -1.7  | 1.34E-06 | 3.54E-05 |
| 1557910_at   | HSP90AB1  | -0.769 | -1.7  | 1.63E-03 | 9.41E-03 |
| 220407_s_at  | TGFB2     | -0.769 | -1.7  | 1.81E-05 | 2.89E-04 |
| 226599_at    | FHDC1     | -0.771 | -1.71 | 1.17E-11 | 2.44E-09 |
| 244758_at    | SCAND3    | -0.772 | -1.71 | 5.33E-08 | 2.67E-06 |
| 206561_s_at  | AKR1B10   | -0.772 | -1.71 | 1.50E-02 | 4.98E-02 |
| 200824_at    | GSTP1     | -0.772 | -1.71 | 5.34E-05 | 6.73E-04 |
| 220022_at    | ZNF334    | -0.772 | -1.71 | 4.14E-04 | 3.28E-03 |
| 223690_at    | LTBP2     | -0.773 | -1.71 | 5.17E-07 | 1.64E-05 |
| 207233_s_at  | MITF      | -0.774 | -1.71 | 3.76E-07 | 1.26E-05 |
| 231230_at    | KCNK10    | -0.774 | -1.71 | 7.40E-08 | 3.47E-06 |
| 204268_at    | S100A2    | -0.775 | -1.71 | 5.65E-07 | 1.77E-05 |
| 215198_s_at  | CALD1     | -0.776 | -1.71 | 5.54E-08 | 2.76E-06 |
| 216222_s_at  | MYO10     | -0.776 | -1.71 | 4.30E-05 | 5.66E-04 |
| 231935_at    | ARPP21    | -0.778 | -1.71 | 1.94E-11 | 3.66E-09 |
| 226187_at    | CDS1      | -0.778 | -1.71 | 6.57E-15 | 4.11E-12 |
| 236140_at    | GCLM      | -0.778 | -1.71 | 4.28E-04 | 3.37E-03 |
| 243611_at    | MICALCL   | -0.778 | -1.71 | 2.82E-10 | 3.42E-08 |
| 217230_at    | EZR       | -0.778 | -1.71 | 3.83E-04 | 3.09E-03 |
| 241990_at    | RHOV      | -0.779 | -1.72 | 3.82E-08 | 2.00E-06 |
| 218677_at    | S100A14   | -0.779 | -1.72 | 3.66E-07 | 1.23E-05 |
| 217234_s_at  | EZR       | -0.779 | -1.72 | 3.37E-04 | 2.80E-03 |
| 1555074_a_at | KCNH5     | -0.779 | -1.72 | 1.29E-05 | 2.22E-04 |
| 217294_s_at  | ENO1      | -0.78  | -1.72 | 5.14E-04 | 3.86E-03 |
| 210372_s_at  | TPD52L1   | -0.782 | -1.72 | 3.87E-06 | 8.45E-05 |
| 221920_s_at  | SLC25A37  | -0.782 | -1.72 | 1.21E-07 | 5.07E-06 |
| 1553691_at   | B3GALNT2  | -0.782 | -1.72 | 1.79E-12 | 4.82E-10 |
| 206137_at    | RIMS2     | -0.783 | -1.72 | 1.00E-09 | 9.81E-08 |
| 1558388_a_at | UG0898H09 | -0.783 | -1.72 | 7.41E-04 | 5.13E-03 |
| 206375_s_at  | HSPB3     | -0.785 | -1.72 | 2.33E-06 | 5.55E-05 |
| 218574_s_at  | LMCD1     | -0.785 | -1.72 | 1.51E-07 | 6.02E-06 |
| 227524_at    | FZD3      | -0.786 | -1.72 | 6.96E-08 | 3.30E-06 |



|              |                     |        |       |          |          |
|--------------|---------------------|--------|-------|----------|----------|
| 213358_at    | SOGA2               | -0.789 | -1.73 | 6.89E-06 | 1.34E-04 |
| 203184_at    | FBN2                | -0.79  | -1.73 | 7.60E-04 | 5.22E-03 |
| 213456_at    | SOSTDC1             | -0.79  | -1.73 | 3.34E-07 | 1.15E-05 |
| 201105_at    | LGALS1              | -0.79  | -1.73 | 3.96E-05 | 5.32E-04 |
| 201148_s_at  | TIMP3               | -0.791 | -1.73 | 2.92E-07 | 1.03E-05 |
| 201559_s_at  | CLIC4               | -0.792 | -1.73 | 8.06E-07 | 2.36E-05 |
| 220710_at    | ANP32A-IT1          | -0.794 | -1.73 | 1.71E-05 | 2.78E-04 |
| 1566465_at   | KCNK1               | -0.795 | -1.73 | 3.29E-04 | 2.75E-03 |
| 201846_s_at  | RYBP                | -0.795 | -1.73 | 2.39E-06 | 5.68E-05 |
| 242141_at    | HDAC2               | -0.795 | -1.73 | 1.74E-07 | 6.75E-06 |
| 209679_s_at  | SMAGP               | -0.797 | -1.74 | 6.67E-09 | 4.60E-07 |
| 209243_s_at  | PEG3                | -0.798 | -1.74 | 5.29E-07 | 1.67E-05 |
| 235095_at    | CCDC64B             | -0.799 | -1.74 | 1.34E-09 | 1.23E-07 |
| 220518_at    | ABI3BP              | -0.8   | -1.74 | 3.36E-05 | 4.69E-04 |
| 1556316_s_at | LOC284889           | -0.802 | -1.74 | 2.28E-06 | 5.46E-05 |
| 227499_at    | FZD3                | -0.803 | -1.74 | 4.66E-08 | 2.37E-06 |
| 217893_s_at  | AKIRIN1             | -0.803 | -1.74 | 1.58E-04 | 1.56E-03 |
| 216591_s_at  | SDHC                | -0.804 | -1.75 | 2.35E-03 | 1.24E-02 |
| 203797_at    | VSNL1               | -0.805 | -1.75 | 1.43E-08 | 8.79E-07 |
| 221803_s_at  | NRBF2               | -0.806 | -1.75 | 3.01E-12 | 7.47E-10 |
| 219956_at    | GALNT6              | -0.806 | -1.75 | 5.66E-06 | 1.14E-04 |
| 226390_at    | STARD4              | -0.807 | -1.75 | 1.83E-06 | 4.56E-05 |
| 204733_at    | KLK6                | -0.807 | -1.75 | 4.65E-04 | 3.59E-03 |
| 220527_at    | MRPL20              | -0.808 | -1.75 | 8.32E-09 | 5.52E-07 |
| 205255_x_at  | TCF7                | -0.808 | -1.75 | 2.43E-13 | 8.63E-11 |
| 206777_s_at  | CRYBB2 /// CRYBB2P1 | -0.81  | -1.75 | 4.80E-03 | 2.12E-02 |
| 222784_at    | SMOC1               | -0.811 | -1.76 | 1.92E-05 | 3.03E-04 |
| 237466_s_at  | HHIP                | -0.813 | -1.76 | 1.02E-09 | 9.94E-08 |
| 1552487_a_at | BNC1                | -0.813 | -1.76 | 8.30E-08 | 3.79E-06 |
| 210978_s_at  | TAGLN2              | -0.813 | -1.76 | 1.62E-04 | 1.59E-03 |
| 217185_s_at  | ZNF259 /// ZNF259P1 | -0.813 | -1.76 | 8.53E-10 | 8.52E-08 |
| 1553711_a_at | FAM218A             | -0.814 | -1.76 | 4.72E-07 | 1.52E-05 |
| 211002_s_at  | TRIM29              | -0.815 | -1.76 | 3.88E-05 | 5.23E-04 |
| 226968_at    | KIF1B               | -0.815 | -1.76 | 6.37E-05 | 7.70E-04 |
| 229097_at    | DIAPH3              | -0.819 | -1.76 | 5.28E-06 | 1.08E-04 |
| 204730_at    | RIMS3               | -0.82  | -1.77 | 7.68E-14 | 3.26E-11 |
| 230498_at    | MCHR1               | -0.822 | -1.77 | 4.68E-06 | 9.80E-05 |
| 201445_at    | CNN3                | -0.822 | -1.77 | 5.39E-06 | 1.10E-04 |
| 235275_at    | BMP8B               | -0.826 | -1.77 | 2.80E-08 | 1.57E-06 |
| 208055_s_at  | HERC4               | -0.827 | -1.77 | 1.10E-05 | 1.94E-04 |
| 210276_s_at  | TRIOBP              | -0.829 | -1.78 | 3.62E-11 | 6.17E-09 |
| 240024_at    | SEC14L2             | -0.829 | -1.78 | 2.90E-05 | 4.20E-04 |

|              |                   |        |       |          |          |
|--------------|-------------------|--------|-------|----------|----------|
| 224941_at    | PAPPA             | -0.832 | -1.78 | 2.50E-06 | 5.89E-05 |
| 1554524_a_at | OLFM3             | -0.832 | -1.78 | 1.05E-07 | 4.53E-06 |
| 202693_s_at  | STK17A            | -0.832 | -1.78 | 1.64E-09 | 1.42E-07 |
| 1556186_s_at | EMC1              | -0.833 | -1.78 | 4.44E-04 | 3.47E-03 |
| 205899_at    | CCNA1             | -0.835 | -1.78 | 1.60E-04 | 1.58E-03 |
| 203499_at    | EPHA2             | -0.838 | -1.79 | 1.51E-10 | 2.02E-08 |
| 239155_at    | CXADR             | -0.839 | -1.79 | 1.67E-06 | 4.23E-05 |
| 239913_at    | SLC10A4           | -0.839 | -1.79 | 3.88E-09 | 2.96E-07 |
| 200644_at    | MARCKSL1          | -0.839 | -1.79 | 8.62E-07 | 2.48E-05 |
| 201267_s_at  | PSMC3             | -0.84  | -1.79 | 4.06E-04 | 3.24E-03 |
| 239707_at    | SLC5A10           | -0.84  | -1.79 | 3.77E-16 | 4.49E-13 |
| 219382_at    | SERTAD3           | -0.84  | -1.79 | 1.24E-07 | 5.17E-06 |
| 213836_s_at  | WIP1              | -0.842 | -1.79 | 2.91E-12 | 7.25E-10 |
| 219529_at    | CLIC3             | -0.843 | -1.79 | 6.85E-08 | 3.26E-06 |
| 227069_at    | CUX1              | -0.844 | -1.79 | 1.13E-06 | 3.10E-05 |
| 203742_s_at  | LOC732360 /// TDG | -0.845 | -1.8  | 7.47E-11 | 1.16E-08 |
| 223541_at    | HAS3              | -0.847 | -1.8  | 1.33E-05 | 2.26E-04 |
| 1568617_a_at | CAMSAP3           | -0.847 | -1.8  | 3.44E-07 | 1.17E-05 |
| 229065_at    | SLC35F3           | -0.849 | -1.8  | 1.34E-05 | 2.28E-04 |
| 208637_x_at  | ACTN1             | -0.852 | -1.8  | 6.04E-06 | 1.20E-04 |
| 211367_s_at  | CASP1             | -0.853 | -1.81 | 1.78E-07 | 6.91E-06 |
| 209273_s_at  | ISCA1             | -0.853 | -1.81 | 7.65E-14 | 3.26E-11 |
| 231875_at    | KIF21A            | -0.854 | -1.81 | 1.91E-10 | 2.42E-08 |
| 232069_at    | KIF26A            | -0.854 | -1.81 | 2.33E-09 | 1.92E-07 |
| 206409_at    | TIAM1             | -0.854 | -1.81 | 2.96E-04 | 2.55E-03 |
| 225496_s_at  | SYTL2             | -0.855 | -1.81 | 5.56E-08 | 2.77E-06 |
| 226952_at    | EAF1              | -0.855 | -1.81 | 7.83E-14 | 3.29E-11 |
| 222874_s_at  | CLN8              | -0.856 | -1.81 | 9.71E-13 | 2.94E-10 |
| 206044_s_at  | BRAF              | -0.857 | -1.81 | 5.77E-08 | 2.86E-06 |
| 221795_at    | NTRK2             | -0.86  | -1.82 | 7.03E-05 | 8.34E-04 |
| 203354_s_at  | PSD3              | -0.861 | -1.82 | 4.08E-03 | 1.88E-02 |
| 226637_at    | UBE2H             | -0.862 | -1.82 | 3.16E-10 | 3.72E-08 |
| 208613_s_at  | FLNB              | -0.866 | -1.82 | 6.85E-08 | 3.26E-06 |
| 206448_at    | ZNF365            | -0.868 | -1.82 | 3.94E-05 | 5.29E-04 |
| 201615_x_at  | CALD1             | -0.868 | -1.83 | 1.05E-05 | 1.87E-04 |
| 210948_s_at  | LEF1              | -0.869 | -1.83 | 2.86E-11 | 5.07E-09 |
| 211071_s_at  | MLLT11            | -0.869 | -1.83 | 2.82E-10 | 3.42E-08 |
| 231858_x_at  | AP5B1             | -0.87  | -1.83 | 1.49E-04 | 1.50E-03 |
| 202206_at    | ARL4C             | -0.873 | -1.83 | 1.64E-08 | 9.81E-07 |
| 208555_x_at  | CST2              | -0.873 | -1.83 | 1.49E-15 | 1.28E-12 |
| 221114_at    | AMBN              | -0.874 | -1.83 | 8.67E-06 | 1.61E-04 |
| 226623_at    | PHYHIPL           | -0.876 | -1.83 | 4.15E-09 | 3.13E-07 |

|                  |                  |        |       |          |          |
|------------------|------------------|--------|-------|----------|----------|
| 228720_at        | SORCS2           | -0.876 | -1.84 | 3.84E-07 | 1.28E-05 |
| 238460_at        | FAM83A           | -0.877 | -1.84 | 2.44E-09 | 1.99E-07 |
| 219369_s_at      | OTUB2            | -0.878 | -1.84 | 4.41E-09 | 3.26E-07 |
| 201616_s_at      | CALD1            | -0.881 | -1.84 | 5.44E-10 | 5.86E-08 |
| 201341_at        | ENC1             | -0.883 | -1.84 | 2.16E-06 | 5.22E-05 |
| 204132_s_at      | FOXO3 /// FOXO3B | -0.883 | -1.84 | 4.46E-06 | 9.43E-05 |
| 228303_at        | GALNT6           | -0.884 | -1.85 | 2.09E-09 | 1.76E-07 |
| 231192_at        | LPAR3            | -0.888 | -1.85 | 4.47E-19 | 3.35E-15 |
| 235022_at        | FAM210A          | -0.889 | -1.85 | 2.17E-12 | 5.69E-10 |
| 209772_s_at      | CD24             | -0.889 | -1.85 | 6.23E-07 | 1.91E-05 |
| 209098_s_at      | JAG1             | -0.897 | -1.86 | 3.03E-09 | 2.40E-07 |
| 220245_at        | SLC45A2          | -0.9   | -1.87 | 1.19E-08 | 7.50E-07 |
| 212531_at        | LCN2             | -0.901 | -1.87 | 6.37E-04 | 4.56E-03 |
| 34478_at         | RAB11B           | -0.903 | -1.87 | 8.99E-05 | 1.01E-03 |
| 239719_at        | CD109            | -0.904 | -1.87 | 5.49E-10 | 5.90E-08 |
| 241854_at        | DNASE1           | -0.904 | -1.87 | 1.33E-06 | 3.54E-05 |
| 209442_x_at      | ANK3             | -0.908 | -1.88 | 4.58E-05 | 5.94E-04 |
| 226829_at        | AFAP1L2          | -0.908 | -1.88 | 1.47E-16 | 2.02E-13 |
| 215271_at        | TNN              | -0.909 | -1.88 | 4.03E-03 | 1.86E-02 |
| 216641_s_at      | LAD1             | -0.909 | -1.88 | 3.57E-07 | 1.21E-05 |
| 1553915_at       | C10orf126        | -0.91  | -1.88 | 1.44E-10 | 1.94E-08 |
| 233971_at        | FAM166A          | -0.914 | -1.88 | 1.86E-06 | 4.60E-05 |
| 228900_at        | SPECC1           | -0.914 | -1.88 | 1.18E-09 | 1.11E-07 |
| 244533_at        | PTPN14           | -0.914 | -1.88 | 5.59E-04 | 4.12E-03 |
| 1552626_a_a<br>t | TMEM163          | -0.916 | -1.89 | 1.54E-05 | 2.55E-04 |
| 222774_s_at      | NETO2            | -0.918 | -1.89 | 9.69E-08 | 4.26E-06 |
| 226767_s_at      | FAHD1            | -0.919 | -1.89 | 5.77E-06 | 1.16E-04 |
| 1554334_a_a<br>t | DNAJA4           | -0.92  | -1.89 | 2.34E-13 | 8.39E-11 |
| 235075_at        | DSG3             | -0.922 | -1.89 | 2.25E-10 | 2.80E-08 |
| 206758_at        | EDN2             | -0.927 | -1.9  | 1.40E-09 | 1.27E-07 |
| 205534_at        | PCDH7            | -0.927 | -1.9  | 7.14E-07 | 2.14E-05 |
| 206004_at        | TGM3             | -0.927 | -1.9  | 3.27E-08 | 1.77E-06 |
| 214104_at        | GPR161           | -0.928 | -1.9  | 2.47E-11 | 4.48E-09 |
| 211361_s_at      | SERPINB13        | -0.93  | -1.91 | 6.63E-11 | 1.05E-08 |
| 226535_at        | ITGB6            | -0.932 | -1.91 | 1.14E-09 | 1.08E-07 |
| 222783_s_at      | SMOC1            | -0.934 | -1.91 | 3.07E-07 | 1.08E-05 |
| 211219_s_at      | LHX2             | -0.935 | -1.91 | 3.32E-06 | 7.41E-05 |
| 203423_at        | RBP1             | -0.935 | -1.91 | 7.94E-06 | 1.50E-04 |
| 202147_s_at      | IFRD1            | -0.936 | -1.91 | 4.86E-12 | 1.13E-09 |
| 243541_at        | IL31RA           | -0.938 | -1.92 | 3.02E-03 | 1.50E-02 |
| 209242_at        | PEG3             | -0.939 | -1.92 | 6.16E-07 | 1.89E-05 |
| 203367_at        | DUSP14           | -0.941 | -1.92 | 8.31E-16 | 8.30E-13 |

|              |          |        |       |          |          |
|--------------|----------|--------|-------|----------|----------|
| 200906_s_at  | PALLD    | -0.945 | -1.92 | 1.26E-07 | 5.24E-06 |
| 214939_x_at  | MLLT4    | -0.945 | -1.93 | 2.89E-17 | 6.29E-14 |
| 205525_at    | CALD1    | -0.949 | -1.93 | 5.92E-08 | 2.91E-06 |
| 228915_at    | DACH1    | -0.949 | -1.93 | 2.44E-05 | 3.67E-04 |
| 200052_s_at  | ILF2     | -0.95  | -1.93 | 6.16E-07 | 1.89E-05 |
| 219612_s_at  | FGG      | -0.956 | -1.94 | 5.69E-07 | 1.78E-05 |
| 1555299_s_at | ERVW-1   | -0.957 | -1.94 | 4.15E-10 | 4.70E-08 |
| 211538_s_at  | HSPA2    | -0.957 | -1.94 | 1.71E-12 | 4.69E-10 |
| 222853_at    | FLRT3    | -0.96  | -1.95 | 5.62E-09 | 4.01E-07 |
| 231395_at    | ATP8A2   | -0.961 | -1.95 | 6.83E-09 | 4.69E-07 |
| 212942_s_at  | KIAA1199 | -0.962 | -1.95 | 8.46E-11 | 1.29E-08 |
| 207367_at    | ATP12A   | -0.962 | -1.95 | 1.37E-03 | 8.26E-03 |
| 223078_s_at  | TMOD3    | -0.963 | -1.95 | 3.86E-12 | 9.29E-10 |
| 239586_at    | FAM83A   | -0.966 | -1.95 | 7.78E-09 | 5.25E-07 |
| 1552685_a_at | GRHL1    | -0.968 | -1.96 | 5.69E-09 | 4.04E-07 |
| 204351_at    | S100P    | -0.972 | -1.96 | 1.92E-05 | 3.03E-04 |
| 233555_s_at  | SULF2    | -0.974 | -1.96 | 4.56E-08 | 2.32E-06 |
| 1552511_a_at | CPA6     | -0.976 | -1.97 | 1.63E-13 | 6.28E-11 |
| 205676_at    | CYP27B1  | -0.977 | -1.97 | 1.59E-04 | 1.57E-03 |
| 204378_at    | BCAS1    | -0.982 | -1.98 | 2.36E-10 | 2.93E-08 |
| 232149_s_at  | NSMAF    | -0.985 | -1.98 | 3.11E-09 | 2.46E-07 |
| 223503_at    | TMEM163  | -0.988 | -1.98 | 4.35E-05 | 5.70E-04 |
| 203798_s_at  | VSNL1    | -0.988 | -1.98 | 1.51E-08 | 9.24E-07 |
| 216504_s_at  | SLC39A8  | -0.989 | -1.98 | 2.00E-05 | 3.12E-04 |
| 211764_s_at  | UBE2D1   | -0.99  | -1.99 | 9.05E-14 | 3.76E-11 |
| 205334_at    | S100A1   | -0.993 | -1.99 | 1.39E-06 | 3.65E-05 |
| 212807_s_at  | SORT1    | -0.996 | -1.99 | 2.86E-10 | 3.44E-08 |
| 203222_s_at  | TLE1     | -0.997 | -2    | 1.94E-09 | 1.65E-07 |
| 213759_at    | ARL4C    | -0.998 | -2    | 2.76E-13 | 9.45E-11 |
| 223879_s_at  | OXR1     | -0.999 | -2    | 3.50E-09 | 2.70E-07 |
| 204751_x_at  | DSC2     | -0.999 | -2    | 3.89E-09 | 2.96E-07 |
| 205595_at    | DSG3     | -1     | -2    | 1.63E-07 | 6.42E-06 |
| 1553493_a_at | TDH      | -1     | -2    | 2.51E-09 | 2.03E-07 |
| 216604_s_at  | SLC7A8   | -1     | -2    | 1.21E-07 | 5.08E-06 |
| 205125_at    | PLCD1    | -1.01  | -2.01 | 8.91E-15 | 5.22E-12 |
| 221102_s_at  | TRPM6    | -1.01  | -2.01 | 1.32E-11 | 2.67E-09 |
| 214417_s_at  | FETUB    | -1.01  | -2.01 | 1.70E-06 | 4.29E-05 |
| 200730_s_at  | PTP4A1   | -1.01  | -2.01 | 2.68E-06 | 6.23E-05 |
| 205592_at    | SLC4A1   | -1.01  | -2.01 | 1.77E-12 | 4.81E-10 |
| 204705_x_at  | ALDOB    | -1.02  | -2.02 | 7.46E-07 | 2.22E-05 |
| 207195_at    | CNTN6    | -1.02  | -2.02 | 9.46E-06 | 1.72E-04 |
| 205709_s_at  | CDS1     | -1.02  | -2.02 | 1.50E-09 | 1.33E-07 |

|              |                     |       |       |          |          |
|--------------|---------------------|-------|-------|----------|----------|
| 201147_s_at  | TIMP3               | -1.02 | -2.03 | 5.35E-08 | 2.68E-06 |
| 202435_s_at  | CYP1B1              | -1.02 | -2.03 | 2.49E-04 | 2.22E-03 |
| 215150_at    | YOD1                | -1.02 | -2.03 | 1.81E-10 | 2.34E-08 |
| 239726_at    | ANK3                | -1.03 | -2.04 | 6.12E-05 | 7.46E-04 |
| 1553710_at   | FAM218A             | -1.03 | -2.04 | 1.15E-07 | 4.88E-06 |
| 207291_at    | PRRG4               | -1.03 | -2.04 | 1.06E-06 | 2.94E-05 |
| 202883_s_at  | PPP2R1B             | -1.03 | -2.04 | 4.36E-15 | 2.88E-12 |
| 206140_at    | LHX2                | -1.03 | -2.04 | 1.57E-03 | 9.13E-03 |
| 241412_at    | BTC                 | -1.03 | -2.04 | 2.93E-07 | 1.03E-05 |
| 223679_at    | CTNNB1              | -1.03 | -2.05 | 5.74E-07 | 1.79E-05 |
| 206774_at    | FRMPD1              | -1.03 | -2.05 | 5.75E-11 | 9.28E-09 |
| 229228_at    | CREB5 /// LOC401317 | -1.04 | -2.05 | 2.07E-07 | 7.79E-06 |
| 229856_s_at  | PITHD1              | -1.04 | -2.05 | 9.34E-11 | 1.40E-08 |
| 210387_at    | NCALD               | -1.04 | -2.06 | 1.47E-07 | 5.92E-06 |
| 1555462_at   | PPP1R1C             | -1.04 | -2.06 | 4.34E-07 | 1.42E-05 |
| 220999_s_at  | CYFIP2              | -1.04 | -2.06 | 1.31E-08 | 8.20E-07 |
| 217924_at    | C6orf106            | -1.04 | -2.06 | 7.11E-10 | 7.32E-08 |
| 203535_at    | S100A9              | -1.05 | -2.07 | 6.26E-03 | 2.58E-02 |
| 226681_at    | UBE2H               | -1.05 | -2.07 | 2.32E-11 | 4.30E-09 |
| 228910_at    | CD82                | -1.05 | -2.07 | 1.29E-10 | 1.79E-08 |
| 212822_at    | HEG1                | -1.05 | -2.07 | 6.60E-08 | 3.17E-06 |
| 228605_at    | UBXN2A              | -1.05 | -2.08 | 9.88E-08 | 4.33E-06 |
| 205637_s_at  | SH3GL3              | -1.06 | -2.08 | 1.05E-08 | 6.73E-07 |
| 218980_at    | FHOD3               | -1.06 | -2.08 | 8.96E-07 | 2.56E-05 |
| 1554333_at   | DNAJA4              | -1.06 | -2.08 | 1.90E-11 | 3.66E-09 |
| 223650_s_at  | NRBF2               | -1.06 | -2.08 | 1.46E-12 | 4.12E-10 |
| 205941_s_at  | COL10A1             | -1.06 | -2.09 | 5.84E-12 | 1.33E-09 |
| 202016_at    | MEST                | -1.06 | -2.09 | 2.40E-07 | 8.76E-06 |
| 1557122_s_at | GABRB2              | -1.07 | -2.09 | 2.41E-07 | 8.77E-06 |
| 209875_s_at  | SPP1                | -1.07 | -2.1  | 4.67E-04 | 3.60E-03 |
| 210335_at    | RASSF9              | -1.08 | -2.11 | 6.18E-09 | 4.31E-07 |
| 212915_at    | PDZRN3              | -1.08 | -2.11 | 2.07E-08 | 1.20E-06 |
| 205535_s_at  | PCDH7               | -1.08 | -2.11 | 3.16E-09 | 2.49E-07 |
| 209126_x_at  | KRT6B               | -1.08 | -2.11 | 1.46E-06 | 3.79E-05 |
| 224724_at    | SULF2               | -1.08 | -2.11 | 3.35E-11 | 5.84E-09 |
| 224277_at    | MOP-1               | -1.08 | -2.12 | 2.70E-15 | 2.01E-12 |
| 221389_at    | PLA2G2E             | -1.08 | -2.12 | 4.53E-19 | 3.35E-15 |
| 224520_s_at  | BEST3               | -1.09 | -2.12 | 1.08E-07 | 4.63E-06 |
| 200744_s_at  | GNB1                | -1.09 | -2.12 | 6.45E-16 | 6.81E-13 |
| 204790_at    | SMAD7               | -1.09 | -2.13 | 2.64E-13 | 9.19E-11 |
| 221558_s_at  | LEF1                | -1.09 | -2.13 | 1.13E-10 | 1.63E-08 |
| 206504_at    | CYP24A1             | -1.1  | -2.14 | 1.58E-07 | 6.27E-06 |

|             |                           |       |       |          |          |
|-------------|---------------------------|-------|-------|----------|----------|
| 229942_at   | BNC2                      | -1.1  | -2.14 | 1.55E-08 | 9.38E-07 |
| 235591_at   | SSTR1                     | -1.1  | -2.14 | 1.05E-07 | 4.53E-06 |
| 206376_at   | SLC6A15                   | -1.1  | -2.14 | 1.58E-11 | 3.15E-09 |
| 219768_at   | VTCN1                     | -1.1  | -2.14 | 9.80E-05 | 1.07E-03 |
| 201043_s_at | ANP32A                    | -1.1  | -2.15 | 4.32E-09 | 3.21E-07 |
| 228922_at   | SHF                       | -1.1  | -2.15 | 1.24E-10 | 1.75E-08 |
| 235479_at   | CPEB2                     | -1.11 | -2.15 | 1.08E-10 | 1.58E-08 |
| 238741_at   | FAM83A                    | -1.11 | -2.15 | 7.94E-09 | 5.33E-07 |
| 206089_at   | NELL1                     | -1.11 | -2.15 | 3.79E-04 | 3.07E-03 |
| 241985_at   | JMY                       | -1.11 | -2.16 | 3.33E-11 | 5.83E-09 |
| 227410_at   | FAM43A                    | -1.11 | -2.16 | 3.54E-14 | 1.75E-11 |
| 1556421_at  | LOC286189                 | -1.12 | -2.17 | 2.04E-08 | 1.19E-06 |
| 242344_at   | GABRB2                    | -1.12 | -2.17 | 2.73E-07 | 9.75E-06 |
| 232361_s_at | EHF                       | -1.12 | -2.17 | 1.36E-04 | 1.39E-03 |
| 218384_at   | CARHSP1                   | -1.13 | -2.18 | 2.66E-09 | 2.15E-07 |
| 203827_at   | WIP1                      | -1.13 | -2.19 | 5.45E-15 | 3.54E-12 |
| 219842_at   | ARL15                     | -1.13 | -2.19 | 2.71E-11 | 4.87E-09 |
| 232378_at   | SLC5A9                    | -1.13 | -2.19 | 1.79E-06 | 4.45E-05 |
| 201110_s_at | THBS1                     | -1.13 | -2.19 | 9.43E-07 | 2.67E-05 |
| 226698_at   | FCHSD1                    | -1.14 | -2.2  | 2.87E-11 | 5.07E-09 |
| 213385_at   | CHN2                      | -1.14 | -2.2  | 1.25E-09 | 1.16E-07 |
| 220782_x_at | KLK12                     | -1.15 | -2.21 | 1.36E-06 | 3.60E-05 |
| 231867_at   | TENM2                     | -1.15 | -2.22 | 1.22E-07 | 5.09E-06 |
| 213457_at   | MFHAS1                    | -1.15 | -2.22 | 1.39E-08 | 8.62E-07 |
| 222015_at   | CSNK1E                    | -1.15 | -2.22 | 3.83E-13 | 1.26E-10 |
| 216258_s_at | SERPINB13                 | -1.15 | -2.22 | 7.41E-11 | 1.16E-08 |
| 210521_s_at | FETUB                     | -1.15 | -2.22 | 6.06E-08 | 2.96E-06 |
| 220800_s_at | TMOD3                     | -1.16 | -2.23 | 5.49E-12 | 1.26E-09 |
| 237981_at   | CMYA5                     | -1.16 | -2.23 | 3.58E-09 | 2.76E-07 |
| 227955_s_at | EFNA5                     | -1.16 | -2.23 | 4.79E-12 | 1.13E-09 |
| 217933_s_at | LAP3                      | -1.16 | -2.24 | 2.97E-14 | 1.54E-11 |
| 220129_at   | CCDC169-SOHLH2 /// SOHLH2 | -1.17 | -2.25 | 2.28E-08 | 1.30E-06 |
| 223427_s_at | EPB41L4B                  | -1.17 | -2.25 | 2.43E-10 | 3.00E-08 |
| 236651_at   | KALRN                     | -1.17 | -2.25 | 3.50E-05 | 4.83E-04 |
| 228653_at   | SAMD5                     | -1.17 | -2.25 | 1.14E-06 | 3.12E-05 |
| 217799_x_at | UBE2H                     | -1.17 | -2.25 | 1.69E-11 | 3.34E-09 |
| 230138_at   | NCS1                      | -1.18 | -2.27 | 1.08E-13 | 4.41E-11 |
| 220038_at   | C8orf44-SGK3 /// SGK3     | -1.19 | -2.28 | 1.97E-06 | 4.82E-05 |
| 233340_at   | SPINK13                   | -1.19 | -2.29 | 4.64E-09 | 3.42E-07 |
| 227961_at   | CTSB                      | -1.19 | -2.29 | 5.93E-06 | 1.18E-04 |
| 229084_at   | CNTN4                     | -1.2  | -2.29 | 3.95E-05 | 5.31E-04 |
| 239028_at   | LYPD6                     | -1.2  | -2.29 | 1.78E-13 | 6.73E-11 |
| 208216_at   | DLX4                      | -1.2  | -2.29 | 3.27E-09 | 2.55E-07 |

|                  |                                                                                   |       |       |          |          |
|------------------|-----------------------------------------------------------------------------------|-------|-------|----------|----------|
| 239082_at        | FZD3                                                                              | -1.2  | -2.3  | 7.72E-08 | 3.57E-06 |
| 228068_at        | GOLGA7B                                                                           | -1.2  | -2.3  | 5.58E-14 | 2.46E-11 |
| 236255_at        | PLEKHG4B                                                                          | -1.2  | -2.3  | 3.55E-10 | 4.14E-08 |
| 220272_at        | BNC2                                                                              | -1.2  | -2.3  | 4.33E-08 | 2.23E-06 |
| 209343_at        | EFHD1                                                                             | -1.21 | -2.32 | 1.69E-05 | 2.75E-04 |
| 217395_at        | MT4                                                                               | -1.21 | -2.32 | 1.21E-12 | 3.52E-10 |
| 203650_at        | PROCR                                                                             | -1.22 | -2.32 | 8.64E-16 | 8.40E-13 |
| 201149_s_at      | TIMP3                                                                             | -1.22 | -2.33 | 1.46E-07 | 5.90E-06 |
| 221425_s_at      | ISCA1                                                                             | -1.23 | -2.34 | 1.77E-17 | 4.67E-14 |
| 203413_at        | NELL2                                                                             | -1.23 | -2.34 | 1.25E-06 | 3.36E-05 |
| 208708_x_at      | EIF5                                                                              | -1.23 | -2.35 | 2.30E-18 | 8.50E-15 |
| 229163_at        | CAMK2N1                                                                           | -1.24 | -2.35 | 2.74E-06 | 6.33E-05 |
| 1553539_at       | KRT74                                                                             | -1.24 | -2.36 | 6.52E-10 | 6.79E-08 |
| 226122_at        | PLEKHG1                                                                           | -1.25 | -2.38 | 5.22E-14 | 2.35E-11 |
| 215034_s_at      | TM4SF1                                                                            | -1.25 | -2.39 | 8.63E-09 | 5.69E-07 |
| 230135_at        | HHIP                                                                              | -1.26 | -2.39 | 5.38E-09 | 3.86E-07 |
| 231743_at        | WNT3                                                                              | -1.26 | -2.39 | 8.39E-18 | 2.58E-14 |
| 230469_at        | RTKN2                                                                             | -1.26 | -2.39 | 3.70E-07 | 1.24E-05 |
| 234316_x_at      | KLK12                                                                             | -1.26 | -2.39 | 1.43E-08 | 8.82E-07 |
| 206935_at        | PCDH8                                                                             | -1.26 | -2.39 | 6.61E-05 | 7.93E-04 |
| 242329_at        | CREB5 /// LOC401317                                                               | -1.26 | -2.4  | 3.15E-10 | 3.72E-08 |
| 219250_s_at      | FLRT3                                                                             | -1.26 | -2.4  | 2.45E-12 | 6.34E-10 |
| 209387_s_at      | TM4SF1                                                                            | -1.26 | -2.4  | 7.57E-09 | 5.13E-07 |
| 205471_s_at      | DACH1                                                                             | -1.26 | -2.4  | 1.02E-07 | 4.43E-06 |
| 213793_s_at      | HOMER1                                                                            | -1.27 | -2.41 | 1.18E-08 | 7.49E-07 |
| 214636_at        | CALCB                                                                             | -1.27 | -2.41 | 2.02E-12 | 5.38E-10 |
| 214226_at        | PRSS53                                                                            | -1.27 | -2.42 | 9.69E-15 | 5.60E-12 |
| 1552807_a_a<br>t | SIGLEC10                                                                          | -1.28 | -2.43 | 6.06E-11 | 9.73E-09 |
| 225295_at        | SLC39A10                                                                          | -1.28 | -2.43 | 1.14E-12 | 3.33E-10 |
| 215779_s_at      | HIST1H2BC /// HIST1H2BE ///<br>HIST1H2BF /// HIST1H2BG ///<br>HIST1H2BI /// NCALD | -1.28 | -2.43 | 3.56E-09 | 2.74E-07 |
| 228996_at        | RC3H1                                                                             | -1.29 | -2.44 | 1.53E-13 | 5.95E-11 |
| 206912_at        | FOXE1                                                                             | -1.29 | -2.44 | 7.04E-08 | 3.34E-06 |
| 239203_at        | LSMEM1                                                                            | -1.3  | -2.46 | 1.37E-09 | 1.25E-07 |
| 236263_at        | SHH                                                                               | -1.3  | -2.46 | 2.48E-08 | 1.40E-06 |
| 227950_at        | UBE2H                                                                             | -1.3  | -2.46 | 1.36E-14 | 7.74E-12 |
| 212478_at        | RMND5A                                                                            | -1.3  | -2.47 | 1.51E-18 | 6.95E-15 |
| 232555_at        | CREB5                                                                             | -1.31 | -2.48 | 6.00E-09 | 4.21E-07 |
| 209372_x_at      | TUBB2A /// TUBB2B                                                                 | -1.31 | -2.48 | 3.08E-12 | 7.59E-10 |
| 230740_at        | EHD3                                                                              | -1.32 | -2.49 | 7.24E-09 | 4.95E-07 |
| 222871_at        | KLHDC8A                                                                           | -1.32 | -2.49 | 1.44E-11 | 2.88E-09 |
| 213880_at        | LGR5                                                                              | -1.32 | -2.5  | 1.22E-05 | 2.12E-04 |

|              |                     |       |       |          |          |
|--------------|---------------------|-------|-------|----------|----------|
| 235683_at    | SESN3               | -1.33 | -2.51 | 1.11E-11 | 2.35E-09 |
| 1554097_a_at | MIR31HG             | -1.34 | -2.53 | 8.50E-17 | 1.43E-13 |
| 243478_at    | CHST2               | -1.34 | -2.53 | 1.05E-09 | 1.02E-07 |
| 1556533_at   | LINC00868           | -1.34 | -2.54 | 1.76E-18 | 7.21E-15 |
| 214590_s_at  | UBE2D1              | -1.34 | -2.54 | 4.00E-15 | 2.68E-12 |
| 219683_at    | FZD3                | -1.35 | -2.54 | 4.36E-09 | 3.24E-07 |
| 235723_at    | BNC2                | -1.35 | -2.54 | 1.11E-07 | 4.73E-06 |
| 233586_s_at  | KLK12               | -1.35 | -2.55 | 1.92E-07 | 7.36E-06 |
| 230276_at    | FAM49A              | -1.35 | -2.55 | 1.17E-10 | 1.66E-08 |
| 210689_at    | CLDN14              | -1.36 | -2.57 | 4.23E-12 | 1.00E-09 |
| 237905_at    | KRT25               | -1.37 | -2.58 | 4.38E-04 | 3.43E-03 |
| 216092_s_at  | SLC7A8              | -1.37 | -2.58 | 5.82E-10 | 6.19E-08 |
| 242138_at    | DLX1                | -1.37 | -2.59 | 3.69E-08 | 1.95E-06 |
| 220984_s_at  | SLCO5A1             | -1.38 | -2.6  | 6.42E-11 | 1.03E-08 |
| 1569433_at   | SAMD5               | -1.39 | -2.62 | 8.30E-10 | 8.36E-08 |
| 219301_s_at  | CNTNAP2             | -1.39 | -2.62 | 1.73E-08 | 1.04E-06 |
| 218458_at    | GMCL1               | -1.41 | -2.65 | 5.68E-15 | 3.62E-12 |
| 1558687_a_at | FOXN1               | -1.41 | -2.66 | 1.69E-16 | 2.23E-13 |
| 212479_s_at  | RMND5A              | -1.42 | -2.67 | 8.05E-15 | 4.80E-12 |
| 240389_at    | TRPM6               | -1.42 | -2.67 | 5.87E-08 | 2.89E-06 |
| 1569852_at   | LSMEM1              | -1.42 | -2.68 | 3.90E-14 | 1.87E-11 |
| 206326_at    | GRP                 | -1.43 | -2.69 | 1.15E-03 | 7.22E-03 |
| 227650_at    | HSPA14              | -1.43 | -2.7  | 1.00E-11 | 2.18E-09 |
| 234488_s_at  | GMCL1 /// GMCL1P1   | -1.43 | -2.7  | 3.96E-15 | 2.68E-12 |
| 232568_at    | MGC24103            | -1.43 | -2.7  | 1.24E-08 | 7.82E-07 |
| 221416_at    | PLA2G2F             | -1.44 | -2.7  | 7.93E-17 | 1.40E-13 |
| 203130_s_at  | KIF5C               | -1.44 | -2.71 | 8.99E-08 | 4.02E-06 |
| 200790_at    | ODC1                | -1.44 | -2.72 | 1.87E-15 | 1.57E-12 |
| 219463_at    | LAMP5               | -1.45 | -2.73 | 1.84E-13 | 6.86E-11 |
| 202752_x_at  | SLC7A8              | -1.45 | -2.74 | 4.23E-10 | 4.78E-08 |
| 205931_s_at  | CREB5 /// LOC401317 | -1.46 | -2.75 | 1.61E-08 | 9.66E-07 |
| 238568_s_at  | NPC1                | -1.46 | -2.75 | 1.75E-14 | 9.64E-12 |
| 215785_s_at  | CYFIP2              | -1.47 | -2.76 | 1.29E-13 | 5.18E-11 |
| 206882_at    | SLC1A6              | -1.47 | -2.77 | 8.35E-13 | 2.55E-10 |
| 226887_at    | HSPA14              | -1.47 | -2.78 | 9.41E-19 | 4.97E-15 |
| 219554_at    | RHCG                | -1.48 | -2.78 | 2.52E-09 | 2.03E-07 |
| 225809_at    | PARM1               | -1.48 | -2.79 | 1.83E-10 | 2.34E-08 |
| 231778_at    | DLX3                | -1.48 | -2.79 | 3.06E-16 | 3.89E-13 |
| 229030_at    | CAPN8               | -1.52 | -2.88 | 1.30E-06 | 3.46E-05 |
| 206604_at    | OVOL1               | -1.53 | -2.89 | 1.07E-15 | 9.88E-13 |
| 233814_at    | EFNA5               | -1.53 | -2.9  | 1.26E-11 | 2.59E-09 |
| 242062_at    | SAMD8               | -1.54 | -2.91 | 2.46E-13 | 8.67E-11 |



|                  |            |       |       |          |          |
|------------------|------------|-------|-------|----------|----------|
| 1553494_at       | TDH        | -1.54 | -2.91 | 4.82E-09 | 3.53E-07 |
| 213780_at        | TCHH       | -1.55 | -2.92 | 3.17E-04 | 2.67E-03 |
| 217428_s_at      | COL10A1    | -1.55 | -2.92 | 7.97E-11 | 1.22E-08 |
| 217031_at        | KRT84      | -1.55 | -2.93 | 1.61E-09 | 1.40E-07 |
| 217678_at        | SLC7A11    | -1.57 | -2.96 | 1.20E-10 | 1.70E-08 |
| 1553388_at       | FAM26D     | -1.58 | -2.99 | 5.50E-14 | 2.45E-11 |
| 1553574_at       | IFNE       | -1.58 | -3    | 4.45E-14 | 2.08E-11 |
| 1555774_at       | ZAR1       | -1.59 | -3.02 | 2.56E-17 | 5.91E-14 |
| 208290_s_at      | EIF5       | -1.61 | -3.05 | 5.75E-18 | 1.93E-14 |
| 237003_at        | BEST3      | -1.61 | -3.06 | 1.05E-11 | 2.25E-09 |
| 223739_at        | PADI1      | -1.62 | -3.07 | 3.91E-10 | 4.50E-08 |
| 243445_at        | BNC2       | -1.62 | -3.07 | 2.46E-11 | 4.48E-09 |
| 205290_s_at      | BMP2       | -1.63 | -3.1  | 3.70E-14 | 1.80E-11 |
| 209683_at        | FAM49A     | -1.63 | -3.1  | 1.99E-13 | 7.29E-11 |
| 208250_s_at      | DMBT1      | -1.64 | -3.11 | 5.17E-10 | 5.64E-08 |
| 1553829_at       | CYP1B1-AS1 | -1.64 | -3.12 | 4.56E-10 | 5.04E-08 |
| 209618_at        | CTNND2     | -1.64 | -3.13 | 7.66E-06 | 1.46E-04 |
| 220624_s_at      | ELF5       | -1.67 | -3.19 | 2.22E-17 | 5.47E-14 |
| 224412_s_at      | TRPM6      | -1.67 | -3.19 | 7.45E-09 | 5.06E-07 |
| 213774_s_at      | PPP1R2     | -1.68 | -3.21 | 3.52E-16 | 4.34E-13 |
| 231461_at        | KRT71      | -1.7  | -3.24 | 6.36E-05 | 7.70E-04 |
| 230722_at        | BNC2       | -1.7  | -3.26 | 5.26E-09 | 3.81E-07 |
| 1557321_a_a<br>t | CAPN14     | -1.71 | -3.27 | 1.13E-11 | 2.37E-09 |
| 228975_at        | SP6        | -1.71 | -3.27 | 6.16E-19 | 3.80E-15 |
| 203921_at        | CHST2      | -1.71 | -3.27 | 2.80E-09 | 2.25E-07 |
| 209617_s_at      | CTNND2     | -1.72 | -3.29 | 4.72E-08 | 2.39E-06 |
| 214576_at        | KRT36      | -1.72 | -3.29 | 1.48E-15 | 1.28E-12 |
| 213909_at        | LRRC15     | -1.73 | -3.31 | 3.87E-07 | 1.29E-05 |
| 1554592_a_a<br>t | SLC1A6     | -1.73 | -3.31 | 8.02E-13 | 2.47E-10 |
| 202884_s_at      | PPP2R1B    | -1.73 | -3.31 | 5.01E-14 | 2.28E-11 |
| 232682_at        | MREG       | -1.73 | -3.32 | 5.01E-16 | 5.61E-13 |
| 223720_at        | SPINK7     | -1.75 | -3.36 | 2.65E-07 | 9.54E-06 |
| 213107_at        | TNIK       | -1.75 | -3.37 | 2.29E-13 | 8.30E-11 |
| 238625_at        | C1orf168   | -1.76 | -3.38 | 1.01E-13 | 4.14E-11 |
| 1554593_s_a<br>t | SLC1A6     | -1.76 | -3.39 | 4.32E-10 | 4.84E-08 |
| 233123_at        | SLC40A1    | -1.76 | -3.39 | 6.97E-11 | 1.10E-08 |
| 1553861_at       | TCP11L2    | -1.77 | -3.41 | 3.40E-17 | 6.98E-14 |
| 202886_s_at      | PPP2R1B    | -1.78 | -3.43 | 1.31E-13 | 5.22E-11 |
| 209800_at        | KRT16      | -1.78 | -3.43 | 6.08E-10 | 6.42E-08 |
| 209859_at        | TRIM9      | -1.78 | -3.44 | 9.69E-10 | 9.55E-08 |
| 205724_at        | PKP1       | -1.78 | -3.44 | 2.63E-15 | 2.01E-12 |
| 209757_s_at      | MYCN       | -1.79 | -3.46 | 1.42E-09 | 1.28E-07 |

|                  |          |       |       |          |          |
|------------------|----------|-------|-------|----------|----------|
| 221962_s_at      | UBE2H    | -1.8  | -3.48 | 4.53E-14 | 2.09E-11 |
| 210082_at        | ABCA4    | -1.8  | -3.48 | 2.10E-12 | 5.53E-10 |
| 241014_at        | FLG-AS1  | -1.82 | -3.52 | 9.23E-11 | 1.39E-08 |
| 233301_at        | OXCT2    | -1.82 | -3.54 | 5.09E-17 | 9.58E-14 |
| 227506_at        | SLC16A9  | -1.83 | -3.56 | 3.54E-14 | 1.75E-11 |
| 202376_at        | SERPINA3 | -1.85 | -3.61 | 1.12E-07 | 4.76E-06 |
| 218935_at        | EHD3     | -1.86 | -3.62 | 1.06E-12 | 3.18E-10 |
| 205289_at        | BMP2     | -1.86 | -3.63 | 3.87E-12 | 9.29E-10 |
| 230493_at        | SHISA2   | -1.87 | -3.65 | 3.25E-06 | 7.28E-05 |
| 228646_at        | PPP1R1C  | -1.93 | -3.82 | 1.92E-11 | 3.66E-09 |
| 227763_at        | LYPD6    | -1.94 | -3.84 | 4.41E-09 | 3.26E-07 |
| 238478_at        | BNC2     | -1.96 | -3.88 | 2.11E-09 | 1.76E-07 |
| 219932_at        | SLC27A6  | -1.97 | -3.92 | 4.64E-11 | 7.68E-09 |
| 221627_at        | TRIM10   | -1.99 | -3.97 | 2.05E-10 | 2.57E-08 |
| 210319_x_at      | MSX2     | -2    | -4.01 | 2.70E-13 | 9.34E-11 |
| 218266_s_at      | NCS1     | -2    | -4.01 | 5.57E-16 | 6.05E-13 |
| 237732_at        | PRR9     | -2    | -4.01 | 3.26E-05 | 4.59E-04 |
| 210311_at        | FGF5     | -2.01 | -4.03 | 1.87E-14 | 1.01E-11 |
| 205555_s_at      | MSX2     | -2.02 | -4.04 | 7.76E-16 | 7.97E-13 |
| 209981_at        | CSDC2    | -2.03 | -4.09 | 2.01E-15 | 1.65E-12 |
| 229823_at        | RIMS2    | -2.04 | -4.11 | 3.16E-10 | 3.72E-08 |
| 209921_at        | SLC7A11  | -2.04 | -4.12 | 3.47E-13 | 1.17E-10 |
| 211357_s_at      | ALDOB    | -2.07 | -4.19 | 2.82E-08 | 1.58E-06 |
| 222351_at        | PPP2R1B  | -2.07 | -4.21 | 9.10E-11 | 1.37E-08 |
| 205374_at        | SLN      | -2.09 | -4.25 | 3.11E-11 | 5.48E-09 |
| 204687_at        | PARM1    | -2.1  | -4.29 | 3.65E-13 | 1.22E-10 |
| 211485_s_at      | FGF18    | -2.13 | -4.38 | 4.01E-14 | 1.90E-11 |
| 229158_at        | WNK4     | -2.14 | -4.41 | 3.05E-08 | 1.68E-06 |
| 202166_s_at      | PPP1R2   | -2.16 | -4.48 | 1.73E-21 | 6.41E-17 |
| 224262_at        | IL1F10   | -2.16 | -4.48 | 1.93E-11 | 3.66E-09 |
| 239572_at        | GJA3     | -2.2  | -4.6  | 1.34E-12 | 3.81E-10 |
| 207065_at        | KRT75    | -2.23 | -4.7  | 2.39E-09 | 1.96E-07 |
| 220090_at        | CRNN     | -2.26 | -4.79 | 1.42E-10 | 1.93E-08 |
| 237507_at        | KRT73    | -2.27 | -4.82 | 4.18E-09 | 3.15E-07 |
| 207147_at        | DLX2     | -2.27 | -4.84 | 3.62E-10 | 4.21E-08 |
| 231583_at        | KRT74    | -2.29 | -4.9  | 5.49E-06 | 1.12E-04 |
| 211429_s_at      | SERPINA1 | -2.32 | -4.98 | 1.56E-09 | 1.37E-07 |
| 240388_at        | KRT27    | -2.34 | -5.06 | 3.14E-06 | 7.08E-05 |
| 1564435_a_a<br>t | KRT72    | -2.36 | -5.12 | 1.90E-10 | 2.41E-08 |
| 228705_at        | CAPN12   | -2.37 | -5.17 | 4.27E-16 | 4.93E-13 |
| 219832_s_at      | HOXC13   | -2.37 | -5.18 | 1.35E-16 | 1.99E-13 |
| 1553537_at       | KRT73    | -2.38 | -5.21 | 7.09E-15 | 4.30E-12 |

|                  |                                           |       |       |          |          |
|------------------|-------------------------------------------|-------|-------|----------|----------|
| 202833_s_at      | SERPINA1                                  | -2.42 | -5.35 | 2.03E-08 | 1.18E-06 |
| 203304_at        | BAMBI                                     | -2.43 | -5.38 | 7.76E-12 | 1.73E-09 |
| 219659_at        | ATP8A2                                    | -2.43 | -5.4  | 1.30E-10 | 1.80E-08 |
| 229730_at        | SMTNL2                                    | -2.53 | -5.76 | 6.86E-11 | 1.08E-08 |
| 204720_s_at      | DNAJC6                                    | -2.57 | -5.95 | 1.26E-15 | 1.13E-12 |
| 1562628_at       | KRT40                                     | -2.58 | -5.98 | 7.63E-13 | 2.37E-10 |
| 227764_at        | LYPD6                                     | -2.62 | -6.14 | 3.82E-11 | 6.44E-09 |
| 206987_x_at      | FGF18                                     | -2.72 | -6.58 | 1.08E-12 | 3.19E-10 |
| 211029_x_at      | FGF18                                     | -2.74 | -6.69 | 1.07E-12 | 3.18E-10 |
| 1555775_a_a<br>t | ZAR1                                      | -2.78 | -6.89 | 5.18E-17 | 9.58E-14 |
| 220256_s_at      | OXCT2                                     | -2.9  | -7.44 | 1.60E-20 | 2.96E-16 |
| 220635_at        | PSORS1C2                                  | -2.92 | -7.57 | 2.49E-15 | 1.96E-12 |
| 207716_at        | KRT38                                     | -3.04 | -8.24 | 2.76E-08 | 1.56E-06 |
| 206994_at        | CST4                                      | -3.07 | -8.4  | 8.98E-17 | 1.44E-13 |
| 205713_s_at      | COMP                                      | -3.07 | -8.42 | 7.70E-11 | 1.19E-08 |
| 208092_s_at      | FAM49A                                    | -3.08 | -8.44 | 9.00E-16 | 8.53E-13 |
| 214284_s_at      | FGF18                                     | -3.12 | -8.7  | 2.09E-11 | 3.92E-09 |
| 1564921_at       | KRTAP13-1                                 | -3.13 | -8.78 | 2.26E-07 | 8.34E-06 |
| 206423_at        | ANGPTL7                                   | -3.21 | -9.25 | 3.23E-08 | 1.76E-06 |
| 231382_at        | FGF18                                     | -3.24 | -9.42 | 1.59E-11 | 3.16E-09 |
| 232887_at        | PIRT                                      | -3.27 | -9.65 | 3.28E-15 | 2.33E-12 |
| 206027_at        | S100A3                                    | -3.32 | -10   | 3.39E-14 | 1.72E-11 |
| 1554398_at       | LYG2                                      | -3.36 | -10.2 | 7.00E-15 | 4.30E-12 |
| 230720_at        | RNF182                                    | -3.38 | -10.4 | 2.42E-15 | 1.94E-12 |
| 214517_at        | KRTAP5-9                                  | -3.44 | -10.9 | 2.98E-15 | 2.16E-12 |
| 242301_at        | CBLN2                                     | -3.53 | -11.5 | 3.26E-07 | 1.13E-05 |
| 220779_at        | PADI3                                     | -3.54 | -11.6 | 1.17E-10 | 1.66E-08 |
| 215189_at        | KRT86 /// LOC100509764                    | -3.65 | -12.5 | 8.47E-09 | 5.60E-07 |
| 1562629_a_a<br>t | KRT40                                     | -3.77 | -13.7 | 1.22E-11 | 2.51E-09 |
| 206677_at        | KRT31                                     | -3.95 | -15.5 | 3.62E-11 | 6.17E-09 |
| 234685_x_at      | KRTAP4-9                                  | -4.01 | -16.1 | 6.50E-07 | 1.98E-05 |
| 207146_at        | KRT32                                     | -4.01 | -16.2 | 1.06E-11 | 2.27E-09 |
| 233631_x_at      | KRTAP9-2 /// KRTAP9-8 ///<br>LOC100996762 | -4.03 | -16.4 | 1.12E-06 | 3.08E-05 |
| 240967_at        | KRTAP19-3                                 | -4.08 | -16.9 | 1.16E-08 | 7.40E-07 |
| 237853_x_at      | KRTAP10-12                                | -4.14 | -17.7 | 1.47E-16 | 2.02E-13 |
| 233681_at        | KRTAP3-3                                  | -4.15 | -17.7 | 4.14E-07 | 1.36E-05 |
| 207670_at        | KRT85                                     | -4.22 | -18.6 | 1.22E-09 | 1.13E-07 |
| 1556410_a_a<br>t | KRTAP19-1                                 | -4.4  | -21.1 | 3.16E-08 | 1.73E-06 |
| 234680_at        | KRTAP17-1                                 | -4.4  | -21.1 | 1.30E-09 | 1.20E-07 |
| 216921_s_at      | KRT35                                     | -4.45 | -21.8 | 2.55E-08 | 1.44E-06 |
| 233534_at        | KRTAP3-2                                  | -4.49 | -22.5 | 2.26E-07 | 8.34E-06 |
| 206224_at        | CST1                                      | -4.5  | -22.6 | 1.26E-19 | 1.56E-15 |

|                  |                                            |       |       |          |          |
|------------------|--------------------------------------------|-------|-------|----------|----------|
| 216810_at        | KRTAP4-7                                   | -4.5  | -22.7 | 1.44E-07 | 5.83E-06 |
| 233158_at        | KRT82                                      | -4.52 | -22.9 | 1.23E-12 | 3.55E-10 |
| 234772_s_at      | KRTAP2-1 /// KRTAP2-2                      | -4.54 | -23.2 | 1.31E-07 | 5.42E-06 |
| 206969_at        | KRT34 /// LOC100653049                     | -4.61 | -24.5 | 1.87E-08 | 1.11E-06 |
| 234633_at        | KRTAP4-11                                  | -4.66 | -25.3 | 3.85E-10 | 4.44E-08 |
| 220978_at        | KRTAP1-3                                   | -4.69 | -25.8 | 1.21E-07 | 5.08E-06 |
| 233533_at        | KRTAP1-5                                   | -4.71 | -26.1 | 1.44E-07 | 5.83E-06 |
| 233537_at        | KRTAP3-1                                   | -4.71 | -26.2 | 6.76E-08 | 3.24E-06 |
| 220970_s_at      | KRTAP2-3 /// KRTAP2-4                      | -4.71 | -26.2 | 7.63E-08 | 3.54E-06 |
| 234635_at        | KRTAP4-1                                   | -4.78 | -27.4 | 1.01E-07 | 4.41E-06 |
| 234639_x_at      | KRTAP9-8                                   | -4.84 | -28.7 | 3.68E-08 | 1.95E-06 |
| 220976_s_at      | KRTAP1-1                                   | -4.87 | -29.2 | 4.64E-08 | 2.36E-06 |
| 233640_x_at      | KRTAP9-4                                   | -4.9  | -29.8 | 4.09E-08 | 2.12E-06 |
| 234683_at        | KRTAP4-11 /// KRTAP4-6 ///<br>LOC100134267 | -4.9  | -29.9 | 1.09E-07 | 4.67E-06 |
| 234678_at        | KRTAP4-3                                   | -4.91 | -30   | 4.25E-09 | 3.18E-07 |
| 1564803_at       | KRTAP11-1                                  | -4.93 | -30.4 | 1.14E-09 | 1.08E-07 |
| 1560897_a_a<br>t | KRTAP10-11                                 | -4.95 | -30.9 | 2.82E-11 | 5.03E-09 |
| 224269_at        | KRTAP4-12                                  | -4.97 | -31.4 | 4.38E-08 | 2.24E-06 |
| 234631_at        | KRTAP4-8                                   | -4.99 | -31.7 | 1.31E-10 | 1.81E-08 |
| 208532_x_at      | KRTAP5-8                                   | -5.02 | -32.4 | 6.02E-14 | 2.62E-11 |
| 219270_at        | CHAC1                                      | -5.04 | -32.8 | 1.08E-16 | 1.66E-13 |
| 234679_at        | KRTAP9-3                                   | -5.07 | -33.6 | 4.80E-09 | 3.52E-07 |
| 234691_at        | KRTAP2-1                                   | -5.16 | -35.6 | 2.39E-09 | 1.96E-07 |
| 234637_at        | KRTAP4-5                                   | -5.17 | -36   | 8.68E-09 | 5.70E-07 |
| 213711_at        | KRT81                                      | -5.2  | -36.9 | 7.15E-13 | 2.26E-10 |
| 207787_at        | KRT33B                                     | -5.35 | -40.7 | 1.40E-09 | 1.27E-07 |
| 220972_s_at      | KRTAP9-9                                   | -5.36 | -41.1 | 5.76E-09 | 4.07E-07 |
| 1564960_at       | KRTAP7-1                                   | -5.46 | -43.9 | 9.52E-12 | 2.08E-09 |
| 1561330_at       | DSG4                                       | -5.47 | -44.4 | 1.87E-13 | 6.92E-11 |
| 1555673_at       | KRTAP2-3 /// KRTAP2-4                      | -5.48 | -44.5 | 1.64E-09 | 1.42E-07 |
| 234671_at        | KRTAP4-2                                   | -5.51 | -45.5 | 1.76E-09 | 1.51E-07 |
| 234684_s_at      | KRTAP4-4                                   | -5.53 | -46.2 | 3.03E-09 | 2.40E-07 |
| 207669_at        | KRT83                                      | -5.55 | -46.7 | 1.50E-14 | 8.40E-12 |
| 207457_s_at      | LY6G6D                                     | -5.69 | -51.6 | 3.74E-15 | 2.61E-12 |
| 208483_x_at      | KRT33A                                     | -5.75 | -53.8 | 6.89E-13 | 2.19E-10 |
| 234880_x_at      | KRTAP1-3                                   | -5.89 | -59.4 | 4.77E-13 | 1.54E-10 |
| 221297_at        | GPRC5D                                     | -6.01 | -64.5 | 2.34E-14 | 1.25E-11 |
| 1564974_at       | KRTAP8-1                                   | -6.14 | -70.5 | 1.12E-10 | 1.62E-08 |

**Supplemental Table 3. Loading of Principal Components for Figure 1**

| Gene.Symbol           | Entrez.Gene      | PC1          | PC2          |
|-----------------------|------------------|--------------|--------------|
| KCNH8                 | 131096           | -0.001524302 | -0.023413066 |
| WFDC12                | 128488           | 0.01146765   | 0.02231481   |
| TDH                   | 157739           | -0.011392322 | -0.024839346 |
| KRT73                 | 319101           | -0.021396358 | -0.027002813 |
| CYP1B1-AS1            | 285154           | -0.012629837 | -0.026268239 |
| LYG2                  | 254773           | -0.038555675 | -0.032552768 |
| SLC1A6                | 6511             | -0.020013964 | -0.016243067 |
| SLC1A6                | 6511             | -0.01871392  | -0.022948265 |
| KRTAP2-3 /// KRTAP2-4 | 85294 /// 730755 | -0.075419295 | -0.059160096 |
| ZAR1                  | 326340           | -0.024883389 | -0.031093448 |
| SRGAP2                | 23380            | -0.009106197 | 0.021028605  |
| KRTAP19-1             | 337882           | -0.061268298 | -0.049776857 |
| CAPN14                | 440854           | -0.017259484 | -0.021555483 |
| AHNAK2                | 113146           | -0.013218277 | 0.021658322  |
| KRTAP10-11            | 386678           | -0.058488143 | -0.063546521 |
| DSG4                  | 147409           | -0.058597448 | -0.064012895 |
| KRT40                 | 125115           | -0.024677624 | -0.030420554 |
| KRT40                 | 125115           | -0.040095144 | -0.052399425 |
| RORA                  | 6095             | -0.003867528 | 0.022164673  |
| KRT72                 | 140807           | -0.022043745 | -0.036257658 |
| KRTAP11-1             | 337880           | -0.062015898 | -0.057124623 |
| KRTAP13-1             | 140258           | -0.039256621 | -0.043037888 |
| KRTAP7-1              | 337878           | -0.067303815 | -0.043264077 |
| KRTAP8-1              | 337879           | -0.081012666 | -0.046766017 |
| LMF1                  | 64788            | 0.014147629  | -0.02325881  |
| PPP1R2                | 5504             | -0.019301048 | -0.020359084 |
| SERPINA3              | 12               | -0.02537318  | -0.022605859 |
| SLC7A8                | 23428            | -0.020453972 | -0.009182535 |
| SERPINA1              | 5265             | -0.034168309 | -0.020917568 |
| PPP2R1B               | 5519             | -0.01675194  | -0.020598669 |
| KIF5C                 | 3800             | -0.008461938 | -0.028906367 |
| BAMBI                 | 25805            | -0.019955658 | -0.03741659  |
| PSD3                  | 23362            | -0.020073362 | 0.015331869  |
| S100A9                | 6280             | -0.020940142 | 0.007951259  |
| CXCL9                 | 4283             | 0.034345955  | 0.018789279  |
| CHST2                 | 9435             | -0.016240437 | -0.03018589  |
| COL11A1               | 1301             | -0.006803536 | -0.024465594 |
| CXCL10                | 3627             | 0.032287696  | 0.013639861  |

|                        |                    |              |              |
|------------------------|--------------------|--------------|--------------|
| MMP12                  | 4321               | 0.022996553  | 0.019529245  |
| CGA                    | 1081               | -0.007244098 | -0.020866818 |
| PARM1                  | 25849              | -0.026627347 | -0.017838298 |
| DNAJC6                 | 9829               | -0.023424736 | -0.031224967 |
| FGF1                   | 2246               | -0.002604998 | -0.020120939 |
| BMP2                   | 650                | -0.019339218 | -0.024206278 |
| BARD1                  | 580                | -0.007780222 | 0.020202192  |
| DYNC111                | 1780               | 0.00128182   | -0.021924673 |
| SLN                    | 6588               | -0.021930804 | -0.028013021 |
| MSX2                   | 4488               | -0.016977738 | -0.024204364 |
| CYP27B1                | 1594               | -0.01099425  | -0.022430045 |
| COMP                   | 1311               | -0.038958359 | -0.034692982 |
| PKP1                   | 5317               | -0.02185594  | -0.008561197 |
| ZNF264                 | 9422               | -0.011609698 | 0.021084477  |
| CREB5 /// LOC401317    | 9586 /// 401317    | -0.022026584 | -0.01079736  |
| MSX1                   | 4487               | 0.002062228  | -0.020661939 |
| S100A3                 | 6274               | -0.036937821 | -0.038266925 |
| LHX2                   | 9355               | -0.008682195 | -0.032763002 |
| CST1                   | 1469               | -0.043708155 | -0.041514303 |
| RYR3                   | 6263               | 0.006034532  | -0.020813145 |
| GRP                    | 2922               | -0.016207068 | -0.031358896 |
| CCL13                  | 6357               | 0.020546228  | 0.014080331  |
| ANGPTL7                | 10218              | -0.042373608 | -0.043950673 |
| KRT31                  | 3881               | -0.044027617 | -0.050991734 |
| PCDH8                  | 5100               | -0.014749951 | -0.025090169 |
| KRT34 /// LOC100653049 | 3885 /// 100653049 | -0.062675407 | -0.057654477 |
| FGF18                  | 8817               | -0.029676535 | -0.034776424 |
| CST4                   | 1472               | -0.027938737 | -0.0327645   |
| KRT75                  | 9119               | -0.025948441 | -0.033408393 |
| KRT32                  | 3882               | -0.043882591 | -0.051803451 |
| DLX2                   | 1746               | -0.018502521 | -0.035240062 |
| CNTN6                  | 27255              | -0.007855892 | -0.02033424  |
| LY6G6D                 | 58530              | -0.063324004 | -0.060091514 |
| KRT83                  | 3889               | -0.058142508 | -0.064965094 |
| KRT85                  | 3891               | -0.048283049 | -0.055779878 |
| KRT38                  | 8687               | -0.038379079 | -0.036767604 |
| KRT33B                 | 3884               | -0.067598942 | -0.067484545 |
| FAM49A                 | 81553              | -0.027388738 | -0.040154985 |
| DMBT1                  | 1755               | -0.013859746 | -0.021298329 |
| KRT33A                 | 3883               | -0.070423155 | -0.056443699 |
| KRTAP5-8               | 57830              | -0.059175909 | -0.051708999 |

|                        |                     |              |              |
|------------------------|---------------------|--------------|--------------|
| KLF5                   | 688                 | -0.005236923 | 0.021771197  |
| EFHD1                  | 80303               | -0.004377294 | -0.031619771 |
| CTNND2                 | 1501                | -0.022736122 | -0.018969404 |
| CTNND2                 | 1501                | -0.01691292  | -0.033317475 |
| FAM49A                 | 81553               | -0.012972315 | -0.020576476 |
| HLA-DRB4               | 3126                | 0.0276375    | 0.019119355  |
| MYCN                   | 4613                | -0.018360194 | -0.025064914 |
| GRIA1                  | 2890                | -0.003318441 | -0.023634529 |
| KRT16                  | 3868                | -0.025175952 | -0.013922708 |
| TRIM9                  | 114088              | -0.017206037 | -0.02864486  |
| TGFB2                  | 7042                | 0.001962285  | -0.020612141 |
| SLC7A11                | 23657               | -0.018728664 | -0.024176405 |
| CCL18 /// LOC101060271 | 6362 /// 101060271  | 0.021625793  | 0.027901451  |
| CSDC2                  | 27254               | -0.01608149  | -0.023881064 |
| LOC101060589 /// SMG1  | 23049 /// 101060589 | -0.014852727 | 0.02075315   |
| ABCA4                  | 24                  | -0.019620523 | -0.022701089 |
| LILRB2                 | 10288               | 0.02024238   | -0.001386092 |
| FGF5                   | 2250                | -0.02018816  | -0.02249281  |
| MSX2                   | 4488                | -0.018387771 | -0.024252611 |
| FGF18                  | 8817                | -0.03099121  | -0.033570249 |
| ALDOB                  | 229                 | -0.025718172 | -0.024302997 |
| SERPINA1               | 5265                | -0.030107653 | -0.02236958  |
| FGF18                  | 8817                | -0.021598311 | -0.025293331 |
| SERPINB4               | 6318                | -0.023499228 | 0.015210265  |
| SPAG9                  | 9043                | -0.014159715 | 0.020809126  |
| TNIK                   | 23043               | -0.017777551 | -0.020191408 |
| SEZ6L                  | 23544               | 0.000776125  | -0.021630037 |
| COL9A2                 | 1298                | 0.009869533  | -0.022479887 |
| KRT81                  | 3887                | -0.058355525 | -0.063873539 |
| TCHH                   | 7062                | -0.022558577 | -0.031682057 |
| HOMER1                 | 9456                | -0.020859152 | 0.001183053  |
| LGR5                   | 8549                | -0.016773289 | -0.02490914  |
| LRRC15                 | 131578              | -0.023479012 | -0.024422221 |
| TBC1D30                | 23329               | -0.001905264 | -0.023687819 |
| SST                    | 6750                | -0.003064783 | -0.020361433 |
| FGF18                  | 8817                | -0.036167421 | -0.040571063 |
| KRTAP5-9               | 3846                | -0.034560332 | -0.038824181 |
| SLURP1                 | 57152               | -0.00053953  | 0.029507977  |
| PRF1                   | 5551                | 0.020077874  | -0.003343446 |
| EXPH5                  | 23086               | -0.007839454 | 0.020979568  |

|                        |                    |              |              |
|------------------------|--------------------|--------------|--------------|
| KRT86 /// LOC100509764 | 3892 /// 100509764 | -0.047555026 | -0.045208406 |
| TNN                    | 63923              | -0.005358564 | -0.02926051  |
| POU2F3                 | 25833              | -0.005964562 | 0.020341199  |
| HCRP1                  | 387535             | -0.008744807 | 0.020895345  |
| C1orf68                | 100129271          | 0.006643736  | 0.021009736  |
| LINC00302              | 388699             | 0.016468567  | 0.020405039  |
| KRTAP4-7               | 100132476          | -0.065953833 | -0.051697004 |
| KRT35                  | 3886               | -0.052376865 | -0.061537121 |
| C1orf68                | 100129271          | 0.007575664  | 0.023588484  |
| NCS1                   | 23413              | -0.021287628 | -0.01360443  |
| EHD3                   | 30845              | -0.017521973 | -0.025356732 |
| FHOD3                  | 80206              | -0.004552575 | -0.022331992 |
| CHAC1                  | 79094              | -0.05438228  | -0.053414932 |
| SLAMF8                 | 56833              | 0.022460559  | 0.003984615  |
| ZMAT3                  | 64393              | -0.014353186 | 0.022367161  |
| ATP8A2                 | 51761              | -0.030687878 | -0.025993912 |
| VTCN1                  | 79679              | -0.007625127 | -0.028997432 |
| HOXC13                 | 3229               | -0.026155423 | -0.023889012 |
| SLC16A10               | 117247             | -0.003132058 | 0.021703678  |
| SLC27A6                | 28965              | -0.024579762 | -0.021042283 |
| CRNN                   | 49860              | -0.017744509 | -0.033241074 |
| OXCT2                  | 64064              | -0.026894356 | -0.029272282 |
| PSORS1C2               | 170680             | -0.031960638 | -0.027697342 |
| PADI3                  | 51702              | -0.039588825 | -0.050505891 |
| KRTAP2-3 /// KRTAP2-4  | 85294 /// 730755   | -0.068002243 | -0.053600632 |
| KRTAP9-9               | 81870              | -0.074055494 | -0.061738501 |
| KRTAP1-1               | 81851              | -0.067118878 | -0.061774608 |
| KRTAP1-3               | 81850              | -0.065911576 | -0.058625484 |
| GPRC5D                 | 55507              | -0.069910412 | -0.062645489 |
| UBE2H                  | 7328               | -0.02146762  | -0.014479847 |
| PPP2R1B                | 5519               | -0.012702404 | -0.028786372 |
| IL1F10                 | 84639              | -0.022762133 | -0.012482346 |
| KRTAP4-12              | 83755              | -0.069700736 | -0.060746462 |
| TRPM6                  | 140803             | -0.018385832 | -0.026554921 |
| LOC100132319           | 100132319          | -0.00240889  | -0.023776712 |
| COL8A1                 | 1295               | -8.13E-05    | -0.020593872 |
| MIR612 /// NEAT1       | 283131 /// 693197  | -0.011556263 | 0.021479359  |
| SLC16A9                | 220963             | -0.019779434 | -0.02044738  |
| LYPD6                  | 130574             | -0.022630992 | -0.02857373  |
| LYPD6                  | 130574             | -0.032980448 | -0.029951741 |
| CTSB                   | 1508               | -0.021543508 | 0.012203865  |



|                                                                                               |                                                                                      |              |              |
|-----------------------------------------------------------------------------------------------|--------------------------------------------------------------------------------------|--------------|--------------|
| LMF1                                                                                          | 64788                                                                                | 0.013991826  | -0.024267742 |
| MS4A1                                                                                         | 931                                                                                  | 0.021237065  | -0.002813991 |
| PPP1R1C                                                                                       | 151242                                                                               | -0.021564889 | -0.018707331 |
| SAMD5                                                                                         | 389432                                                                               | -0.012777582 | -0.023252289 |
| CAPN12                                                                                        | 147968                                                                               | -0.020346243 | -0.03086003  |
| CAPN8                                                                                         | 388743                                                                               | -0.013964521 | -0.031832182 |
| SLC25A13                                                                                      | 10165                                                                                | -0.00532952  | 0.020271778  |
| CNTN4                                                                                         | 152330                                                                               | -0.01077022  | -0.028823482 |
| LIMS3 /// LIMS3-LOC440895<br>/// LIMS3L /// LOC100288570<br>/// LOC100507334 ///<br>LOC440895 | 96626 /// 440895 ///<br>100271835 ///<br>100288570 ///<br>100288695 ///<br>100507334 | 0.00843126   | -0.023865569 |
| WNK4                                                                                          | 65266                                                                                | -0.019881364 | -0.041605467 |
| COL11A1                                                                                       | 1301                                                                                 | -0.012881869 | -0.023963247 |
| SMTNL2                                                                                        | 342527                                                                               | -0.022550796 | -0.038879456 |
| RIMS2                                                                                         | 9699                                                                                 | -0.019344738 | -0.033093731 |
| GFRA3                                                                                         | 2676                                                                                 | 0.000797875  | -0.021746508 |
| DDX17                                                                                         | 10521                                                                                | -0.012222068 | 0.020970614  |
| HAPLN1                                                                                        | 1404                                                                                 | -0.007359373 | -0.023049162 |
| FAM49A                                                                                        | 81553                                                                                | -0.009677161 | -0.020937046 |
| RTKN2                                                                                         | 219790                                                                               | -0.008863433 | -0.024012323 |
| SHISA2                                                                                        | 387914                                                                               | -0.023863057 | -0.03264598  |
| RNF182                                                                                        | 221687                                                                               | -0.034382137 | -0.038812401 |
| BNC2                                                                                          | 54796                                                                                | -0.025038914 | -0.009851629 |
| EHD3                                                                                          | 30845                                                                                | -0.010711936 | -0.024029415 |
| FGF18                                                                                         | 8817                                                                                 | -0.035229164 | -0.046576458 |
| KRT71                                                                                         | 112802                                                                               | -0.020832202 | -0.035673271 |
| KRT74                                                                                         | 121391                                                                               | -0.027211587 | -0.043891906 |
| SERPINB6                                                                                      | 5269                                                                                 | 0.012148399  | 0.020038006  |
| ARG1                                                                                          | 383                                                                                  | -0.008033876 | 0.027614963  |
| EHF                                                                                           | 26298                                                                                | -0.014393016 | 0.020930983  |
| EHF                                                                                           | 26298                                                                                | -0.022105522 | 0.018042243  |
| SLC5A9                                                                                        | 200010                                                                               | -0.008374956 | -0.026309335 |
| MGC24103                                                                                      | 158295                                                                               | -0.020807784 | -0.011341111 |
| PIRT                                                                                          | 644139                                                                               | -0.033757063 | -0.039273987 |
| SLC40A1                                                                                       | 30061                                                                                | -0.024343347 | -0.006819826 |
| KRT82                                                                                         | 3888                                                                                 | -0.049407628 | -0.056238822 |
| OXCT2                                                                                         | 64064                                                                                | -0.014987322 | -0.02107257  |
| KRTAP1-5                                                                                      | 83895                                                                                | -0.066980639 | -0.058734502 |
| KRTAP3-2                                                                                      | 83897                                                                                | -0.064485202 | -0.0561138   |

|                                            |                                   |              |              |
|--------------------------------------------|-----------------------------------|--------------|--------------|
| KRTAP3-1                                   | 83896                             | -0.062577842 | -0.066428164 |
| KRTAP9-2 /// KRTAP9-8 ///<br>LOC100996762  | 83899 /// 83901 ///<br>100996762  | -0.060721729 | -0.048465992 |
| KRTAP9-4                                   | 85280                             | -0.070314294 | -0.055562615 |
| KRTAP3-3                                   | 85293                             | -0.057289679 | -0.057391815 |
| EFNA5                                      | 1946                              | -0.020162894 | -0.008717154 |
| KRTAP4-8                                   | 728224                            | -0.065494204 | -0.053353125 |
| KRTAP4-11                                  | 653240                            | -0.062055983 | -0.051065988 |
| KRTAP4-1                                   | 85285                             | -0.068403994 | -0.058284468 |
| KRTAP4-5                                   | 85289                             | -0.069048246 | -0.066137825 |
| KRTAP9-8                                   | 83901                             | -0.06853258  | -0.052281377 |
| KRTAP4-2                                   | 85291                             | -0.075110951 | -0.060129488 |
| KRTAP4-3                                   | 85290                             | -0.068599769 | -0.052302485 |
| KRTAP9-3                                   | 83900                             | -0.069807278 | -0.058151301 |
| KRTAP17-1                                  | 83902                             | -0.055823734 | -0.057383792 |
| KRTAP4-11 /// KRTAP4-6 ///<br>LOC100134267 | 81871 /// 653240 ///<br>100134267 | -0.07041952  | -0.059124013 |
| KRTAP4-4                                   | 84616                             | -0.078455783 | -0.055682129 |
| KRTAP4-9                                   | 100132386                         | -0.059851237 | -0.046259252 |
| KRTAP2-1                                   | 81872                             | -0.070614316 | -0.056041067 |
| KRTAP2-1 /// KRTAP2-2                      | 81872 /// 728279                  | -0.06319279  | -0.059336389 |
| KRTAP1-3                                   | 81850                             | -0.073427665 | -0.057122807 |
| CBLN3                                      | 643866                            | 0.023624616  | -0.004853244 |
| SSTR1                                      | 6751                              | -0.006971892 | -0.020167143 |
| KALRN                                      | 8997                              | -0.011450717 | -0.028797227 |
| BEST3                                      | 144453                            | -0.012747434 | -0.022991113 |
| KRT73                                      | 319101                            | -0.017149675 | -0.040864827 |
| PRR9                                       | 574414                            | -0.026633486 | -0.037848339 |
| KRTAP10-12                                 | 386685                            | -0.046207678 | -0.039577255 |
| KRT25                                      | 147183                            | -0.016845684 | -0.031593713 |
| BNC2                                       | 54796                             | -0.029829109 | -0.005143697 |
| C1orf168                                   | 199920                            | -0.017236303 | -0.020723632 |
| SH3RF2                                     | 153769                            | -0.008912792 | 0.020790525  |
| LSMEM1                                     | 286006                            | -0.010087775 | -0.02233185  |
| GJA3                                       | 2700                              | -0.023819691 | -0.025964851 |
| ANK3                                       | 288                               | -0.020781147 | 0.010047587  |
| KRT27                                      | 342574                            | -0.031342423 | -0.037072157 |
| TRPM6                                      | 140803                            | -0.013860716 | -0.024859436 |
| KRTAP19-3                                  | 337970                            | -0.055646898 | -0.038031819 |
| FLG-AS1                                    | 339400                            | -0.015693709 | -0.024175446 |
| DLX1                                       | 1745                              | -0.009564261 | -0.023425273 |

|                        |                    |              |              |
|------------------------|--------------------|--------------|--------------|
| CBLN2                  | 147381             | -0.047098379 | -0.050645357 |
| BNC2                   | 54796              | -0.017066407 | -0.021032853 |
| CHST2                  | 9435               | -0.012286278 | -0.020809599 |
| IL31RA                 | 133396             | -0.00981094  | -0.028147793 |
| KANSL1                 | 284058             | -0.014162994 | 0.021145815  |
| SHANK2                 | 22941              | 0.012030759  | -0.022181703 |
| SCAF4                  | 57466              | -0.015796668 | 0.020025721  |
| CCL18 /// LOC101060271 | 6362 /// 101060271 | 0.021138556  | 0.027739241  |
| COL11A1                | 1301               | -0.007141394 | -0.02958902  |

### Supplemental Table 4. AT/AU vs NC Differential Expression

| ProbeSetID  | GeneSymbol               | logF |      | p.value  | BH_fdr   |
|-------------|--------------------------|------|------|----------|----------|
|             |                          | C    | F    |          |          |
| 209728_at   | HLA-DRB4                 | 4.19 | 18.3 | 1.73E-05 | 1.78E-04 |
| 203915_at   | CXCL9                    | 3.95 | 15.5 | 1.10E-11 | 1.61E-09 |
| 204533_at   | CXCL10                   | 3.44 | 10.8 | 4.61E-11 | 5.31E-09 |
| 209924_at   | CCL18 /// LOC101060271   | 2.94 | 7.66 | 1.36E-09 | 8.88E-08 |
| 32128_at    | CCL18 /// LOC101060271   | 2.93 | 7.62 | 4.44E-09 | 2.36E-07 |
| 204580_at   | MMP12                    | 2.63 | 6.18 | 1.58E-06 | 2.59E-05 |
| 206407_s_at | CCL13                    | 2.35 | 5.1  | 2.11E-10 | 1.91E-08 |
| 216714_at   | CCL13                    | 2.26 | 4.81 | 5.20E-10 | 4.08E-08 |
| 219386_s_at | SLAMF8                   | 2.19 | 4.55 | 2.54E-12 | 4.59E-10 |
| 215666_at   | HLA-DRB4                 | 2.17 | 4.49 | 3.45E-04 | 1.94E-03 |
| 205758_at   | CD8A                     | 2.1  | 4.3  | 7.85E-09 | 3.74E-07 |
| 206749_at   | CD1B                     | 1.94 | 3.85 | 3.01E-07 | 6.98E-06 |
| 204869_at   | PCSK2                    | 1.93 | 3.82 | 1.12E-13 | 3.13E-11 |
| 228592_at   | MS4A1                    | 1.91 | 3.75 | 1.36E-04 | 9.31E-04 |
| 205821_at   | KLRC4-KLRK1 /// KLRK1    | 1.89 | 3.7  | 8.79E-11 | 9.28E-09 |
| 235221_at   | CBLN3                    | 1.88 | 3.68 | 8.12E-09 | 3.85E-07 |
| 204655_at   | CCL5                     | 1.87 | 3.66 | 6.95E-10 | 5.19E-08 |
| 217147_s_at | TRAT1                    | 1.86 | 3.62 | 3.18E-07 | 7.23E-06 |
| 1405_i_at   | CCL5                     | 1.85 | 3.6  | 7.49E-10 | 5.47E-08 |
| 227194_at   | FAM3B                    | 1.84 | 3.58 | 9.19E-12 | 1.39E-09 |
| 205987_at   | CD1C                     | 1.8  | 3.49 | 2.63E-11 | 3.31E-09 |
| 205831_at   | CD2                      | 1.8  | 3.48 | 3.80E-09 | 2.09E-07 |
| 216718_at   | LINC00302                | 1.78 | 3.43 | 2.40E-06 | 3.64E-05 |
| 229641_at   | CCBE1                    | 1.78 | 3.43 | 3.82E-10 | 3.15E-08 |
| 213537_at   | HLA-DPA1                 | 1.77 | 3.41 | 9.18E-06 | 1.07E-04 |
| 216935_at   | LINC00302                | 1.77 | 3.4  | 1.05E-06 | 1.86E-05 |
| 213475_s_at | ITGAL                    | 1.76 | 3.38 | 1.71E-10 | 1.60E-08 |
| 228381_at   | ATF7IP2 /// LOC100287628 | 1.74 | 3.34 | 4.88E-08 | 1.64E-06 |
| 214617_at   | PRF1                     | 1.74 | 3.33 | 1.67E-08 | 6.83E-07 |
| 210176_at   | TLR1                     | 1.71 | 3.28 | 2.15E-14 | 8.31E-12 |
| 206715_at   | TFEC                     | 1.71 | 3.27 | 2.71E-08 | 1.03E-06 |
| 1554748_at  | CLCNKB                   | 1.7  | 3.24 | 8.79E-08 | 2.62E-06 |
| 210247_at   | SYN2                     | 1.69 | 3.23 | 9.84E-09 | 4.45E-07 |
| 229437_at   | MIR155 /// MIR155HG      | 1.69 | 3.22 | 3.50E-08 | 1.26E-06 |
| 229151_at   | SLC14A1                  | 1.69 | 3.22 | 2.30E-04 | 1.41E-03 |
| 205488_at   | GZMA                     | 1.69 | 3.22 | 3.96E-07 | 8.53E-06 |
| 205043_at   | CFTR                     | 1.68 | 3.22 | 8.12E-07 | 1.51E-05 |
| 210146_x_at | LILRB2                   | 1.68 | 3.21 | 5.13E-08 | 1.71E-06 |
| 236285_at   | KLHDC7B                  | 1.66 | 3.17 | 2.95E-08 | 1.11E-06 |
| 216920_s_at | TARP /// TRGC2           | 1.66 | 3.16 | 2.71E-07 | 6.41E-06 |
| 219890_at   | CLEC5A                   | 1.65 | 3.15 | 4.92E-12 | 8.12E-10 |

|              |                           |      |      |          |          |
|--------------|---------------------------|------|------|----------|----------|
| 204714_s_at  | F5                        | 1.64 | 3.11 | 2.37E-08 | 9.22E-07 |
| 229779_at    | COL4A4                    | 1.63 | 3.09 | 2.42E-08 | 9.39E-07 |
| 214321_at    | NOV                       | 1.62 | 3.08 | 1.95E-09 | 1.21E-07 |
| 215228_at    | NHLH2                     | 1.62 | 3.08 | 1.03E-07 | 2.95E-06 |
| 206069_s_at  | ACADL                     | 1.61 | 3.06 | 6.72E-10 | 5.09E-08 |
| 219607_s_at  | MS4A4A                    | 1.61 | 3.06 | 7.34E-09 | 3.54E-07 |
| 1552870_s_at | AXDND1                    | 1.61 | 3.05 | 3.83E-05 | 3.35E-04 |
| 1559263_s_at | ZC3H12D                   | 1.61 | 3.05 | 4.95E-11 | 5.56E-09 |
| 211657_at    | CEACAM6                   | 1.6  | 3.03 | 6.37E-06 | 7.90E-05 |
| 204891_s_at  | LCK                       | 1.59 | 3.02 | 3.34E-10 | 2.83E-08 |
| 216233_at    | CD163                     | 1.59 | 3.02 | 1.25E-08 | 5.37E-07 |
| 215049_x_at  | CD163                     | 1.59 | 3    | 7.05E-10 | 5.22E-08 |
| 238725_at    | IRF1                      | 1.58 | 3    | 4.54E-10 | 3.64E-08 |
| 220005_at    | P2RY13                    | 1.58 | 2.99 | 1.98E-10 | 1.82E-08 |
| 206545_at    | CD28                      | 1.57 | 2.96 | 8.29E-07 | 1.54E-05 |
| 1557570_a_at | LOC285084                 | 1.56 | 2.96 | 1.41E-06 | 2.38E-05 |
| 211656_x_at  | HLA-DQB1 /// LOC101060835 | 1.56 | 2.95 | 5.00E-10 | 3.95E-08 |
| 203645_s_at  | CD163                     | 1.55 | 2.93 | 1.44E-09 | 9.34E-08 |
| 211339_s_at  | ITK                       | 1.55 | 2.93 | 2.47E-07 | 5.96E-06 |
| 236295_s_at  | NLRC3                     | 1.55 | 2.93 | 6.43E-09 | 3.18E-07 |
| 230753_at    | PATL2                     | 1.54 | 2.9  | 1.02E-10 | 1.05E-08 |
| 244413_at    | CLECL1                    | 1.54 | 2.9  | 9.46E-09 | 4.32E-07 |
| 243585_at    | ATP13A5                   | 1.52 | 2.87 | 4.63E-10 | 3.71E-08 |
| 213240_s_at  | KRT4                      | 1.52 | 2.86 | 1.45E-06 | 2.43E-05 |
| 224555_x_at  | IL37                      | 1.51 | 2.85 | 5.84E-06 | 7.41E-05 |
| 242488_at    | CHRM3                     | 1.51 | 2.85 | 1.81E-06 | 2.89E-05 |
| 206637_at    | P2RY14                    | 1.51 | 2.85 | 1.44E-11 | 2.01E-09 |
| 214219_x_at  | MAP4K1                    | 1.51 | 2.84 | 2.50E-11 | 3.20E-09 |
| 210915_x_at  | TRBC1                     | 1.5  | 2.82 | 8.38E-09 | 3.93E-07 |
| 228943_at    | MAP6                      | 1.5  | 2.82 | 6.99E-10 | 5.20E-08 |
| 1558972_s_at | THEMIS                    | 1.49 | 2.82 | 9.40E-07 | 1.70E-05 |
| 235080_at    | CLUAP1                    | 1.49 | 2.81 | 1.70E-08 | 6.91E-07 |
| 215806_x_at  | TARP /// TRGC2            | 1.49 | 2.81 | 1.06E-06 | 1.87E-05 |
| 231776_at    | EOMES                     | 1.49 | 2.8  | 4.02E-06 | 5.51E-05 |
| 230983_at    | FAM129C                   | 1.48 | 2.8  | 9.43E-06 | 1.09E-04 |
| 219820_at    | SLC6A16                   | 1.48 | 2.8  | 6.55E-11 | 7.05E-09 |
| 213193_x_at  | TRBC1                     | 1.48 | 2.79 | 2.65E-08 | 1.01E-06 |
| 206134_at    | ADAMDEC1                  | 1.48 | 2.78 | 1.46E-06 | 2.44E-05 |
| 1555993_at   | CACNA1D                   | 1.47 | 2.78 | 8.96E-14 | 2.59E-11 |
| 227553_at    | PIK3R5                    | 1.47 | 2.78 | 3.11E-09 | 1.77E-07 |
| 203757_s_at  | CEACAM6                   | 1.47 | 2.78 | 4.38E-06 | 5.90E-05 |
| 227142_at    | PLEKHG5                   | 1.47 | 2.78 | 1.06E-10 | 1.08E-08 |
| 214038_at    | CCL8                      | 1.46 | 2.76 | 2.06E-07 | 5.19E-06 |

|             |                   |      |      |          |          |
|-------------|-------------------|------|------|----------|----------|
| 206296_x_at | MAP4K1            | 1.46 | 2.76 | 1.97E-10 | 1.81E-08 |
| 211796_s_at | TRBC1             | 1.46 | 2.75 | 1.21E-06 | 2.10E-05 |
| 211144_x_at | TARP /// TRGC2    | 1.46 | 2.74 | 5.36E-07 | 1.07E-05 |
| 221080_s_at | DENND1C           | 1.46 | 2.74 | 2.17E-09 | 1.31E-07 |
| 221470_s_at | IL37              | 1.45 | 2.74 | 3.26E-05 | 2.94E-04 |
| 204377_s_at | VPRBP             | 1.45 | 2.74 | 1.24E-11 | 1.79E-09 |
| 206666_at   | GZMK              | 1.45 | 2.73 | 2.35E-05 | 2.28E-04 |
| 230391_at   | CD84              | 1.45 | 2.73 | 5.74E-09 | 2.93E-07 |
| 228869_at   | SNX20             | 1.44 | 2.72 | 3.89E-10 | 3.19E-08 |
| 204205_at   | APOBEC3G          | 1.44 | 2.72 | 6.40E-10 | 4.88E-08 |
| 207981_s_at | ESRRG             | 1.44 | 2.72 | 1.49E-07 | 4.02E-06 |
| 227742_at   | CLIC6             | 1.44 | 2.71 | 7.36E-08 | 2.30E-06 |
| 207957_s_at | PRKCB             | 1.44 | 2.71 | 8.89E-09 | 4.11E-07 |
| 227346_at   | IKZF1             | 1.43 | 2.7  | 3.10E-09 | 1.76E-07 |
| 204446_s_at | ALOX5             | 1.43 | 2.7  | 2.87E-07 | 6.71E-06 |
| 231124_x_at | LY9               | 1.43 | 2.7  | 3.12E-08 | 1.16E-06 |
| 213539_at   | CD3D              | 1.43 | 2.69 | 3.86E-10 | 3.18E-08 |
| 205890_s_at | GABBR1 /// UBD    | 1.43 | 2.69 | 5.05E-06 | 6.60E-05 |
| 239529_at   | C5orf20 /// TIFAB | 1.42 | 2.68 | 4.38E-09 | 2.33E-07 |
| 206761_at   | CD96              | 1.42 | 2.67 | 8.64E-09 | 4.01E-07 |
| 230110_at   | MCOLN2            | 1.42 | 2.67 | 1.34E-07 | 3.66E-06 |
| 213920_at   | CUX2              | 1.41 | 2.66 | 1.76E-04 | 1.14E-03 |
| 1553081_at  | WFDC12            | 1.41 | 2.65 | 4.56E-04 | 2.43E-03 |
| 226136_at   | GLIPR1            | 1.41 | 2.65 | 2.40E-10 | 2.14E-08 |
| 207802_at   | CRISP3            | 1.41 | 2.65 | 4.81E-04 | 2.52E-03 |
| 229499_at   | CAPN13            | 1.41 | 2.65 | 1.06E-05 | 1.20E-04 |
| 214339_s_at | MAP4K1            | 1.41 | 2.65 | 8.39E-10 | 6.00E-08 |
| 230418_s_at | GALNT16           | 1.4  | 2.64 | 1.49E-08 | 6.22E-07 |
| 233052_at   | DNAH8             | 1.4  | 2.64 | 6.13E-06 | 7.69E-05 |
| 209813_x_at | TARP              | 1.4  | 2.63 | 2.79E-07 | 6.56E-06 |
| 209606_at   | CYTIP             | 1.39 | 2.63 | 2.25E-09 | 1.35E-07 |
| 206914_at   | CRTAM             | 1.39 | 2.63 | 1.21E-08 | 5.23E-07 |
| 206082_at   | HCP5              | 1.39 | 2.63 | 2.32E-11 | 3.00E-09 |
| 203471_s_at | PLEK              | 1.39 | 2.62 | 3.01E-09 | 1.73E-07 |
| 228362_s_at | FAM26F            | 1.39 | 2.62 | 2.05E-06 | 3.21E-05 |
| 236028_at   | IBSP              | 1.39 | 2.62 | 6.33E-06 | 7.86E-05 |
| 227645_at   | PIK3R5            | 1.39 | 2.62 | 1.37E-10 | 1.33E-08 |
| 205280_at   | GLRB              | 1.39 | 2.61 | 1.52E-09 | 9.71E-08 |
| 238229_at   | TMEM67            | 1.39 | 2.61 | 8.87E-09 | 4.11E-07 |
| 205804_s_at | TRAF3IP3          | 1.38 | 2.61 | 2.61E-07 | 6.23E-06 |
| 228094_at   | AMICA1            | 1.38 | 2.6  | 1.32E-10 | 1.29E-08 |
| 226218_at   | IL7R              | 1.37 | 2.59 | 7.80E-06 | 9.32E-05 |
| 231029_at   | F5                | 1.37 | 2.59 | 1.12E-05 | 1.25E-04 |

|              |                       |      |      |          |          |
|--------------|-----------------------|------|------|----------|----------|
| 232081_at    | ABCG1                 | 1.37 | 2.58 | 1.32E-11 | 1.88E-09 |
| 206227_at    | CILP                  | 1.37 | 2.58 | 5.53E-05 | 4.49E-04 |
| 1556472_s_at | SCML4                 | 1.36 | 2.57 | 1.48E-07 | 3.99E-06 |
| 1552584_at   | IL12RB1               | 1.36 | 2.57 | 2.51E-07 | 6.03E-06 |
| 210038_at    | PRKCQ                 | 1.36 | 2.56 | 2.42E-05 | 2.33E-04 |
| 205180_s_at  | ADAM8                 | 1.36 | 2.56 | 9.35E-09 | 4.28E-07 |
| 227353_at    | TMC8                  | 1.35 | 2.56 | 1.82E-08 | 7.32E-07 |
| 229383_at    | 1-Mar                 | 1.35 | 2.55 | 6.01E-10 | 4.62E-08 |
| 214081_at    | PLXDC1                | 1.34 | 2.54 | 2.82E-06 | 4.15E-05 |
| 204424_s_at  | LMO3                  | 1.34 | 2.54 | 1.09E-05 | 1.22E-04 |
| 241418_at    | LOC344887             | 1.34 | 2.53 | 2.83E-05 | 2.64E-04 |
| 203416_at    | CD53                  | 1.34 | 2.53 | 4.96E-09 | 2.59E-07 |
| 1556666_a_at | LOC101059957 /// TTC6 | 1.34 | 2.53 | 2.73E-06 | 4.06E-05 |
| 214044_at    | RYR2                  | 1.34 | 2.52 | 1.61E-08 | 6.62E-07 |
| 214203_s_at  | PRODH                 | 1.34 | 2.52 | 4.65E-09 | 2.44E-07 |
| 1560396_at   | KLHL6                 | 1.33 | 2.51 | 4.01E-06 | 5.51E-05 |
| 1557474_at   | LOC284578             | 1.33 | 2.51 | 7.28E-07 | 1.39E-05 |
| 231348_s_at  | LMO3                  | 1.33 | 2.51 | 1.97E-05 | 1.97E-04 |
| 214399_s_at  | KRT4                  | 1.33 | 2.51 | 4.75E-06 | 6.28E-05 |
| 210164_at    | GZMB                  | 1.33 | 2.51 | 5.32E-07 | 1.07E-05 |
| 235276_at    | EPSTI1                | 1.32 | 2.5  | 2.71E-10 | 2.36E-08 |
| 1566671_a_at | PD XK                 | 1.32 | 2.5  | 1.56E-05 | 1.63E-04 |
| 1561306_s_at | STRC                  | 1.32 | 2.5  | 1.18E-08 | 5.16E-07 |
| 220485_s_at  | SIRPG                 | 1.32 | 2.5  | 2.27E-07 | 5.59E-06 |
| 207908_at    | KRT2                  | 1.32 | 2.5  | 1.17E-06 | 2.04E-05 |
| 236782_at    | SAMD3                 | 1.32 | 2.5  | 4.17E-06 | 5.67E-05 |
| 44673_at     | SIGLEC1               | 1.32 | 2.49 | 4.43E-08 | 1.51E-06 |
| 230799_at    | LOC100134259          | 1.32 | 2.49 | 7.54E-09 | 3.63E-07 |
| 214567_s_at  | XCL1 /// XCL2         | 1.31 | 2.48 | 3.03E-07 | 7.00E-06 |
| 219385_at    | SLAMF8                | 1.31 | 2.48 | 1.69E-09 | 1.07E-07 |
| 241981_at    | FAM20A                | 1.31 | 2.48 | 8.54E-07 | 1.57E-05 |
| 1562364_at   | GVINP1                | 1.31 | 2.48 | 2.27E-07 | 5.59E-06 |
| 214873_at    | LRP5L                 | 1.31 | 2.47 | 2.99E-06 | 4.35E-05 |
| 203761_at    | SLA                   | 1.3  | 2.47 | 9.13E-11 | 9.55E-09 |
| 204160_s_at  | ENPP4                 | 1.3  | 2.46 | 3.04E-07 | 7.01E-06 |
| 220780_at    | PLA2G3                | 1.3  | 2.46 | 1.80E-08 | 7.25E-07 |
| 204777_s_at  | MAL                   | 1.3  | 2.46 | 2.03E-09 | 1.24E-07 |
| 212975_at    | DENND3                | 1.29 | 2.45 | 5.70E-09 | 2.91E-07 |
| 205364_at    | ACOX2                 | 1.29 | 2.44 | 2.54E-05 | 2.42E-04 |
| 204411_at    | KIF21B                | 1.29 | 2.44 | 1.39E-07 | 3.80E-06 |
| 236175_at    | TRIM55                | 1.29 | 2.44 | 4.26E-05 | 3.66E-04 |
| 238983_at    | NSUN7                 | 1.28 | 2.43 | 2.09E-07 | 5.24E-06 |
| 228298_at    | PCED1B                | 1.28 | 2.43 | 1.31E-07 | 3.61E-06 |

|              |                                        |      |      |          |          |
|--------------|----------------------------------------|------|------|----------|----------|
| 201884_at    | CEACAM5                                | 1.28 | 2.42 | 1.04E-06 | 1.84E-05 |
| 235291_s_at  | FLJ32255                               | 1.28 | 2.42 | 6.70E-07 | 1.29E-05 |
| 1559194_a_at | CLEC4GP1                               | 1.28 | 2.42 | 1.90E-06 | 3.01E-05 |
| 236270_at    | NFATC4                                 | 1.27 | 2.42 | 1.61E-10 | 1.52E-08 |
| 204994_at    | MX2                                    | 1.27 | 2.41 | 8.36E-10 | 5.99E-08 |
| 229391_s_at  | FAM26F                                 | 1.27 | 2.41 | 4.17E-06 | 5.67E-05 |
| 229510_at    | MS4A14                                 | 1.26 | 2.4  | 7.52E-07 | 1.42E-05 |
| 242268_at    | CELF2                                  | 1.26 | 2.4  | 9.64E-08 | 2.81E-06 |
| 209969_s_at  | STAT1                                  | 1.26 | 2.39 | 1.69E-08 | 6.90E-07 |
| 236081_at    | SNCA                                   | 1.26 | 2.39 | 7.47E-07 | 1.42E-05 |
| 202524_s_at  | SPOCK2                                 | 1.26 | 2.39 | 9.43E-08 | 2.76E-06 |
| 230560_at    | STXBP6                                 | 1.26 | 2.39 | 2.17E-08 | 8.58E-07 |
| 1564474_at   | ZBED3-AS1                              | 1.25 | 2.38 | 1.36E-04 | 9.29E-04 |
| 204959_at    | MNDA                                   | 1.25 | 2.37 | 2.01E-10 | 1.83E-08 |
| 244297_at    | ANKRD18A                               | 1.24 | 2.37 | 1.62E-06 | 2.64E-05 |
| 226311_at    | ADAMTS2                                | 1.24 | 2.37 | 9.35E-09 | 4.28E-07 |
| 206366_x_at  | XCL1                                   | 1.24 | 2.36 | 1.60E-07 | 4.25E-06 |
| 240197_at    | SYN2                                   | 1.23 | 2.35 | 5.33E-07 | 1.07E-05 |
| 220330_s_at  | SAMSN1                                 | 1.23 | 2.35 | 6.36E-05 | 5.02E-04 |
| 214450_at    | CTSW                                   | 1.23 | 2.35 | 1.28E-06 | 2.19E-05 |
| 213830_at    | YME1L1                                 | 1.23 | 2.34 | 3.50E-05 | 3.11E-04 |
| 211200_s_at  | EFCAB2                                 | 1.22 | 2.34 | 2.76E-04 | 1.63E-03 |
| 213960_at    | NTRK3                                  | 1.22 | 2.33 | 1.98E-05 | 1.98E-04 |
| 204440_at    | CD83                                   | 1.22 | 2.33 | 3.45E-09 | 1.92E-07 |
| 227647_at    | KCNE3                                  | 1.22 | 2.33 | 3.91E-07 | 8.45E-06 |
| 212671_s_at  | HLA-DQA1 /// HLA-DQA2 /// LOC100509457 | 1.22 | 2.33 | 2.55E-05 | 2.43E-04 |
| 1556474_a_at | FLJ38379                               | 1.22 | 2.33 | 5.34E-07 | 1.07E-05 |
| 217059_at    | MUC7                                   | 1.22 | 2.33 | 6.48E-03 | 2.03E-02 |
| 218795_at    | ACP6                                   | 1.22 | 2.32 | 5.63E-08 | 1.86E-06 |
| 207277_at    | CD209                                  | 1.22 | 2.32 | 7.87E-08 | 2.42E-06 |
| 206513_at    | AIM2                                   | 1.21 | 2.32 | 3.36E-06 | 4.78E-05 |
| 229254_at    | MFSD4                                  | 1.21 | 2.32 | 7.32E-08 | 2.29E-06 |
| 215784_at    | CD1E                                   | 1.21 | 2.32 | 9.30E-06 | 1.08E-04 |
| 242641_at    | COL6A6                                 | 1.21 | 2.31 | 1.55E-04 | 1.04E-03 |
| 230550_at    | MS4A6A                                 | 1.21 | 2.31 | 2.45E-07 | 5.93E-06 |
| 209823_x_at  | HLA-DQB1 /// LOC101060835              | 1.21 | 2.31 | 5.36E-07 | 1.07E-05 |
| 221978_at    | HLA-F                                  | 1.2  | 2.31 | 7.72E-11 | 8.22E-09 |
| 213723_s_at  | IDUA                                   | 1.2  | 2.3  | 1.71E-07 | 4.44E-06 |
| 220577_at    | GVINP1                                 | 1.2  | 2.3  | 3.26E-08 | 1.19E-06 |
| 227210_at    | SFMBT2                                 | 1.2  | 2.3  | 4.08E-10 | 3.31E-08 |
| 206118_at    | STAT4                                  | 1.2  | 2.3  | 1.91E-07 | 4.86E-06 |
| 211743_s_at  | PRG2                                   | 1.2  | 2.3  | 6.01E-08 | 1.95E-06 |
| 229723_at    | TAGAP                                  | 1.2  | 2.3  | 9.77E-07 | 1.75E-05 |



|              |                     |      |      |          |          |
|--------------|---------------------|------|------|----------|----------|
| 209785_s_at  | PLA2G4C             | 1.2  | 2.3  | 3.78E-07 | 8.24E-06 |
| 204279_at    | PSMB9               | 1.2  | 2.29 | 1.07E-10 | 1.09E-08 |
| 218627_at    | DRAM1               | 1.2  | 2.29 | 3.44E-12 | 6.05E-10 |
| 223122_s_at  | SFRP2               | 1.2  | 2.29 | 3.30E-06 | 4.70E-05 |
| 206143_at    | SLC26A3             | 1.19 | 2.29 | 5.24E-04 | 2.70E-03 |
| 220003_at    | LRRC36              | 1.19 | 2.29 | 3.40E-07 | 7.58E-06 |
| 207710_at    | LCE2B               | 1.19 | 2.29 | 5.73E-05 | 4.61E-04 |
| 208438_s_at  | FGR                 | 1.19 | 2.28 | 1.35E-09 | 8.85E-08 |
| 205269_at    | LCP2                | 1.19 | 2.27 | 2.52E-08 | 9.70E-07 |
| 209879_at    | SELPLG              | 1.18 | 2.27 | 1.30E-09 | 8.58E-08 |
| 214913_at    | ADAMTS3             | 1.18 | 2.27 | 1.47E-09 | 9.50E-08 |
| 205270_s_at  | LCP2                | 1.18 | 2.27 | 6.20E-09 | 3.09E-07 |
| 219704_at    | YBX2                | 1.18 | 2.27 | 1.58E-06 | 2.60E-05 |
| 244572_at    | KY                  | 1.18 | 2.26 | 2.10E-07 | 5.25E-06 |
| 206587_at    | CCT6B               | 1.18 | 2.26 | 1.05E-09 | 7.19E-08 |
| 206785_s_at  | KLRC1 /// KLRC2     | 1.18 | 2.26 | 3.22E-08 | 1.18E-06 |
| 219666_at    | MS4A6A              | 1.18 | 2.26 | 3.07E-07 | 7.07E-06 |
| 227183_at    | MIR143HG /// MIR145 | 1.17 | 2.26 | 1.27E-05 | 1.38E-04 |
| 204663_at    | ME3                 | 1.17 | 2.26 | 4.69E-08 | 1.59E-06 |
| 214596_at    | CHRM3               | 1.17 | 2.26 | 2.46E-05 | 2.37E-04 |
| 226248_s_at  | KIAA1324            | 1.17 | 2.25 | 5.44E-07 | 1.09E-05 |
| 220507_s_at  | UPB1                | 1.17 | 2.25 | 6.27E-03 | 1.98E-02 |
| 210026_s_at  | CARD10              | 1.17 | 2.25 | 1.58E-07 | 4.18E-06 |
| 209842_at    | SOX10               | 1.17 | 2.25 | 1.28E-11 | 1.83E-09 |
| 227266_s_at  | FYB                 | 1.17 | 2.24 | 4.06E-07 | 8.68E-06 |
| 209498_at    | CEACAM1             | 1.17 | 2.24 | 1.13E-05 | 1.26E-04 |
| 230937_at    | LOC285835           | 1.17 | 2.24 | 1.14E-04 | 8.05E-04 |
| 231600_at    | CLEC12B             | 1.17 | 2.24 | 4.89E-05 | 4.08E-04 |
| 213888_s_at  | TRAF3IP3            | 1.16 | 2.24 | 8.07E-07 | 1.51E-05 |
| 203895_at    | PLCB4               | 1.16 | 2.24 | 3.73E-07 | 8.17E-06 |
| 229088_at    | ENPP1               | 1.16 | 2.24 | 6.55E-08 | 2.09E-06 |
| 219452_at    | DPEP2               | 1.16 | 2.23 | 9.21E-08 | 2.71E-06 |
| 230925_at    | APBB1IP             | 1.16 | 2.23 | 4.36E-06 | 5.89E-05 |
| 202957_at    | HCLS1               | 1.16 | 2.23 | 4.87E-09 | 2.55E-07 |
| 220358_at    | BATF3               | 1.16 | 2.23 | 7.47E-07 | 1.42E-05 |
| 228060_at    | SLC35F1             | 1.16 | 2.23 | 2.45E-08 | 9.48E-07 |
| 1564475_s_at | ZBED3-AS1           | 1.16 | 2.23 | 9.75E-05 | 7.09E-04 |
| 206181_at    | SLAMF1              | 1.16 | 2.23 | 3.20E-08 | 1.18E-06 |
| 1554360_at   | FCHSD2              | 1.16 | 2.23 | 1.13E-05 | 1.26E-04 |
| 223343_at    | MS4A7               | 1.16 | 2.23 | 2.36E-05 | 2.29E-04 |
| 228532_at    | C1orf162            | 1.16 | 2.23 | 2.73E-09 | 1.58E-07 |
| 205432_at    | OVGP1               | 1.15 | 2.22 | 8.21E-10 | 5.91E-08 |
| 233907_s_at  | SERTAD4             | 1.15 | 2.22 | 2.42E-08 | 9.39E-07 |

|             |                                    |      |      |          |          |
|-------------|------------------------------------|------|------|----------|----------|
| 205291_at   | IL2RB                              | 1.15 | 2.22 | 1.14E-06 | 1.98E-05 |
| 214243_s_at | SERHL /// SERHL2                   | 1.15 | 2.22 | 4.94E-04 | 2.58E-03 |
| 226436_at   | RASSF4                             | 1.15 | 2.22 | 1.23E-09 | 8.22E-08 |
| 232737_s_at | ENPP3                              | 1.15 | 2.21 | 9.14E-06 | 1.06E-04 |
| 220560_at   | C11orf21                           | 1.14 | 2.21 | 2.31E-07 | 5.64E-06 |
| 230025_at   | GJD3                               | 1.14 | 2.21 | 5.80E-09 | 2.93E-07 |
| 219519_s_at | SIGLEC1                            | 1.14 | 2.21 | 1.33E-06 | 2.26E-05 |
| 206204_at   | GRB14                              | 1.14 | 2.21 | 3.50E-04 | 1.96E-03 |
| 209734_at   | NCKAP1L                            | 1.14 | 2.21 | 9.90E-11 | 1.02E-08 |
| 217087_at   | C1orf68                            | 1.14 | 2.21 | 1.54E-03 | 6.35E-03 |
| 227677_at   | JAK3                               | 1.14 | 2.2  | 2.07E-06 | 3.23E-05 |
| 203892_at   | WFDC2                              | 1.14 | 2.2  | 2.19E-08 | 8.64E-07 |
| 214053_at   | ERBB4                              | 1.14 | 2.2  | 1.25E-05 | 1.37E-04 |
| 208161_s_at | ABCC3                              | 1.14 | 2.2  | 5.86E-08 | 1.92E-06 |
| 211991_s_at | HLA-DPA1                           | 1.13 | 2.2  | 3.21E-09 | 1.80E-07 |
| 235056_at   | ETV6                               | 1.13 | 2.2  | 3.24E-13 | 8.02E-11 |
| 221916_at   | NEFL                               | 1.13 | 2.19 | 7.54E-06 | 9.08E-05 |
| 206247_at   | MICB                               | 1.13 | 2.19 | 7.21E-07 | 1.38E-05 |
| 235486_at   | KIAA1549L                          | 1.13 | 2.19 | 3.39E-06 | 4.82E-05 |
| 202953_at   | C1QB                               | 1.13 | 2.19 | 9.62E-12 | 1.43E-09 |
| 208396_s_at | PDE1A                              | 1.13 | 2.19 | 1.03E-08 | 4.63E-07 |
| 1294_at     | MIR5193 /// UBA7                   | 1.13 | 2.19 | 1.22E-10 | 1.20E-08 |
| 204919_at   | PRH1-PRR4 /// PRR4                 | 1.13 | 2.19 | 1.12E-04 | 7.94E-04 |
| 208885_at   | LCP1                               | 1.13 | 2.19 | 1.23E-08 | 5.29E-07 |
| 232581_x_at | HIVEP3                             | 1.13 | 2.19 | 9.19E-06 | 1.07E-04 |
| 210607_at   | FLT3LG                             | 1.13 | 2.18 | 3.63E-09 | 2.01E-07 |
| 209975_at   | CYP2E1                             | 1.13 | 2.18 | 1.76E-07 | 4.54E-06 |
| 1555854_at  | AKR1C1 /// AKR1C2 /// LOC101060798 | 1.13 | 2.18 | 4.72E-05 | 3.97E-04 |
| 205786_s_at | ITGAM                              | 1.13 | 2.18 | 9.86E-07 | 1.77E-05 |
| 219045_at   | RHOF                               | 1.13 | 2.18 | 2.99E-10 | 2.59E-08 |
| 228057_at   | DDIT4L                             | 1.13 | 2.18 | 3.11E-07 | 7.13E-06 |
| 229634_at   | TMEM139                            | 1.13 | 2.18 | 1.55E-06 | 2.55E-05 |
| 203498_at   | RCAN2                              | 1.12 | 2.18 | 2.99E-10 | 2.59E-08 |
| 205768_s_at | SLC27A2                            | 1.12 | 2.18 | 5.39E-05 | 4.40E-04 |
| 228836_at   | SLC25A35                           | 1.12 | 2.18 | 1.71E-05 | 1.76E-04 |
| 1556136_at  | MYLK4                              | 1.12 | 2.18 | 1.44E-06 | 2.41E-05 |
| 232027_at   | SYNE1                              | 1.12 | 2.17 | 1.61E-07 | 4.25E-06 |
| 239427_at   | SLAMF1                             | 1.12 | 2.17 | 5.62E-07 | 1.11E-05 |
| 204122_at   | TYROBP                             | 1.12 | 2.17 | 3.23E-09 | 1.81E-07 |
| 223691_at   | RGS22                              | 1.12 | 2.17 | 1.55E-06 | 2.55E-05 |
| 204912_at   | IL10RA                             | 1.12 | 2.17 | 6.81E-10 | 5.11E-08 |
| 235708_at   | KLB                                | 1.12 | 2.17 | 3.04E-04 | 1.76E-03 |
| 229797_at   | MCOLN3                             | 1.12 | 2.17 | 4.64E-07 | 9.64E-06 |

|              |                                 |      |      |          |          |
|--------------|---------------------------------|------|------|----------|----------|
| 239272_at    | MMP28                           | 1.12 | 2.17 | 6.32E-07 | 1.23E-05 |
| 214079_at    | DHRS2                           | 1.11 | 2.16 | 6.22E-03 | 1.96E-02 |
| 210184_at    | ITGAX                           | 1.11 | 2.16 | 1.34E-06 | 2.29E-05 |
| 206978_at    | CCR2                            | 1.11 | 2.16 | 2.22E-06 | 3.43E-05 |
| 231015_at    | KLF15                           | 1.11 | 2.16 | 1.97E-07 | 4.98E-06 |
| 212873_at    | HMHA1                           | 1.11 | 2.16 | 4.12E-08 | 1.42E-06 |
| 205419_at    | GPR183                          | 1.11 | 2.16 | 3.74E-07 | 8.19E-06 |
| 229015_at    | LOC286367                       | 1.11 | 2.16 | 4.30E-06 | 5.82E-05 |
| 205098_at    | CCR1                            | 1.11 | 2.16 | 8.44E-09 | 3.95E-07 |
| 229390_at    | FAM26F                          | 1.11 | 2.16 | 2.51E-05 | 2.40E-04 |
| 228573_at    | ANTXR2                          | 1.11 | 2.16 | 1.96E-06 | 3.08E-05 |
| 1554406_a_at | CLEC7A                          | 1.11 | 2.15 | 5.79E-06 | 7.36E-05 |
| 210108_at    | CACNA1D                         | 1.11 | 2.15 | 5.01E-08 | 1.68E-06 |
| 243601_at    | LOC285957                       | 1.11 | 2.15 | 8.55E-10 | 6.10E-08 |
| 1557558_s_at | MATN1-AS1                       | 1.1  | 2.15 | 4.12E-09 | 2.23E-07 |
| 205295_at    | CKMT2                           | 1.1  | 2.15 | 2.63E-07 | 6.24E-06 |
| 214434_at    | HSPA12A                         | 1.1  | 2.15 | 3.01E-09 | 1.73E-07 |
| 226878_at    | HLA-DOA                         | 1.1  | 2.15 | 4.50E-08 | 1.53E-06 |
| 206655_s_at  | GP1BB /// SEPT5 /// SEPT5-GP1BB | 1.1  | 2.15 | 2.33E-06 | 3.56E-05 |
| 201743_at    | CD14                            | 1.1  | 2.15 | 4.06E-11 | 4.76E-09 |
| 212592_at    | IGJ                             | 1.1  | 2.14 | 1.77E-02 | 4.53E-02 |
| 220783_at    | MMP27                           | 1.1  | 2.14 | 4.01E-07 | 8.60E-06 |
| 219999_at    | MAN2A2                          | 1.1  | 2.14 | 3.25E-12 | 5.77E-10 |
| 240409_at    | TPTE2P5                         | 1.1  | 2.14 | 2.17E-07 | 5.40E-06 |
| 213369_at    | CDHR1                           | 1.1  | 2.14 | 6.93E-04 | 3.37E-03 |
| 219319_at    | HIF3A                           | 1.1  | 2.14 | 3.10E-06 | 4.47E-05 |
| 205059_s_at  | IDUA                            | 1.09 | 2.13 | 3.36E-08 | 1.22E-06 |
| 238423_at    | SYTL3                           | 1.09 | 2.13 | 3.16E-07 | 7.22E-06 |
| 1561394_s_at | KIAA1755                        | 1.09 | 2.13 | 3.18E-07 | 7.23E-06 |
| 235343_at    | VASH2                           | 1.09 | 2.13 | 5.60E-08 | 1.85E-06 |
| 219716_at    | APOL6                           | 1.09 | 2.13 | 5.52E-11 | 6.07E-09 |
| 228342_s_at  | ALPK3                           | 1.09 | 2.13 | 2.80E-04 | 1.65E-03 |
| 210665_at    | TFPI                            | 1.09 | 2.13 | 1.88E-08 | 7.53E-07 |
| 238039_at    | LOC728769                       | 1.09 | 2.12 | 3.90E-10 | 3.19E-08 |
| 229534_at    | ACOT4                           | 1.09 | 2.12 | 2.40E-06 | 3.64E-05 |
| 223741_s_at  | TTYH2                           | 1.08 | 2.12 | 6.25E-09 | 3.10E-07 |
| 244598_at    | LCP2                            | 1.08 | 2.12 | 5.94E-08 | 1.94E-06 |
| 226142_at    | GLIPR1                          | 1.08 | 2.12 | 7.64E-08 | 2.36E-06 |
| 235175_at    | GBP4                            | 1.08 | 2.12 | 6.74E-07 | 1.30E-05 |
| 204197_s_at  | RUNX3                           | 1.08 | 2.12 | 3.06E-11 | 3.78E-09 |
| 226603_at    | SAMD9L                          | 1.08 | 2.12 | 4.19E-08 | 1.44E-06 |
| 41577_at     | PPP1R16B                        | 1.08 | 2.11 | 5.10E-08 | 1.70E-06 |
| 205073_at    | CYP2J2                          | 1.08 | 2.11 | 2.20E-07 | 5.47E-06 |

|              |                                                          |      |      |          |          |
|--------------|----------------------------------------------------------|------|------|----------|----------|
| 217621_at    | SLC6A2                                                   | 1.08 | 2.11 | 7.43E-06 | 8.96E-05 |
| 228367_at    | ALPK2                                                    | 1.08 | 2.11 | 8.82E-08 | 2.62E-06 |
| 235533_at    | COX19                                                    | 1.08 | 2.11 | 2.28E-06 | 3.50E-05 |
| 237291_at    | PRORSD1P                                                 | 1.08 | 2.11 | 1.61E-06 | 2.63E-05 |
| 229354_at    | AHRR                                                     | 1.08 | 2.11 | 6.15E-07 | 1.20E-05 |
| 236261_at    | OSBPL6                                                   | 1.08 | 2.11 | 9.99E-08 | 2.89E-06 |
| 204914_s_at  | SOX11                                                    | 1.08 | 2.11 | 5.48E-05 | 4.46E-04 |
| 205599_at    | TRAF1                                                    | 1.08 | 2.11 | 1.31E-09 | 8.64E-08 |
| 217478_s_at  | HLA-DMA                                                  | 1.08 | 2.11 | 2.14E-11 | 2.84E-09 |
| 1553835_a_at | COL6A5                                                   | 1.08 | 2.11 | 6.27E-03 | 1.98E-02 |
| 203485_at    | RTN1                                                     | 1.07 | 2.11 | 1.63E-07 | 4.29E-06 |
| 205992_s_at  | IL15                                                     | 1.07 | 2.11 | 2.02E-09 | 1.24E-07 |
| 219616_at    | ACSS3                                                    | 1.07 | 2.1  | 2.41E-07 | 5.85E-06 |
| 211138_s_at  | KMO                                                      | 1.07 | 2.1  | 1.50E-09 | 9.61E-08 |
| 1553062_at   | MOGAT1                                                   | 1.07 | 2.1  | 2.76E-04 | 1.63E-03 |
| 210619_s_at  | HYAL1                                                    | 1.07 | 2.1  | 2.14E-04 | 1.33E-03 |
| 215133_s_at  | FAM153A /// FAM153B /// LOC100507387 ///<br>LOC100507427 | 1.07 | 2.1  | 2.41E-04 | 1.46E-03 |
| 238575_at    | OSBPL6                                                   | 1.07 | 2.1  | 4.16E-06 | 5.66E-05 |
| 210432_s_at  | SCN3A                                                    | 1.07 | 2.1  | 1.45E-05 | 1.53E-04 |
| 212970_at    | APBB2                                                    | 1.07 | 2.1  | 9.18E-09 | 4.23E-07 |
| 242450_at    | RGMB                                                     | 1.07 | 2.09 | 3.26E-07 | 7.35E-06 |
| 207522_s_at  | ATP2A3                                                   | 1.07 | 2.09 | 8.90E-05 | 6.60E-04 |
| 1553834_at   | COL6A5                                                   | 1.06 | 2.09 | 5.57E-03 | 1.80E-02 |
| 1554248_at   | ZNF638                                                   | 1.06 | 2.09 | 1.19E-06 | 2.07E-05 |
| 226474_at    | NLRC5                                                    | 1.06 | 2.09 | 8.28E-10 | 5.95E-08 |
| 243526_at    | WDR86                                                    | 1.06 | 2.09 | 7.03E-05 | 5.45E-04 |
| 228752_at    | EFCAB4B                                                  | 1.06 | 2.09 | 6.63E-04 | 3.25E-03 |
| 229619_at    | FOLR2                                                    | 1.06 | 2.08 | 2.74E-07 | 6.47E-06 |
| 209901_x_at  | AIF1                                                     | 1.06 | 2.08 | 6.23E-09 | 3.10E-07 |
| 236918_s_at  | LRRC34                                                   | 1.06 | 2.08 | 3.16E-06 | 4.54E-05 |
| 210644_s_at  | LAIR1                                                    | 1.06 | 2.08 | 1.55E-04 | 1.03E-03 |
| 207302_at    | SGCG                                                     | 1.06 | 2.08 | 2.28E-05 | 2.22E-04 |
| 230888_at    | WDR91                                                    | 1.06 | 2.08 | 7.19E-09 | 3.49E-07 |
| 207651_at    | GPR171                                                   | 1.06 | 2.08 | 1.09E-04 | 7.77E-04 |
| 214889_at    | FAM149A                                                  | 1.06 | 2.08 | 2.47E-07 | 5.95E-06 |
| 206623_at    | PDE6A                                                    | 1.06 | 2.08 | 8.02E-04 | 3.78E-03 |
| 241739_at    | OGFOD1                                                   | 1.06 | 2.08 | 2.14E-05 | 2.11E-04 |
| 219183_s_at  | CYTH4                                                    | 1.06 | 2.08 | 8.39E-08 | 2.54E-06 |
| 209827_s_at  | IL16                                                     | 1.06 | 2.08 | 2.69E-09 | 1.57E-07 |
| 204352_at    | TRAF5                                                    | 1.06 | 2.08 | 8.79E-10 | 6.22E-08 |
| 204501_at    | NOV                                                      | 1.06 | 2.08 | 8.27E-09 | 3.89E-07 |
| 205896_at    | SLC22A4                                                  | 1.06 | 2.08 | 9.35E-05 | 6.86E-04 |

|              |                                    |      |      |          |          |
|--------------|------------------------------------|------|------|----------|----------|
| 204153_s_at  | MFNG                               | 1.06 | 2.08 | 4.16E-09 | 2.24E-07 |
| 203708_at    | PDE4B                              | 1.05 | 2.08 | 1.95E-07 | 4.95E-06 |
| 213752_at    | KAZN                               | 1.05 | 2.07 | 6.39E-12 | 1.01E-09 |
| 206030_at    | ASPA                               | 1.05 | 2.07 | 1.55E-07 | 4.12E-06 |
| 205101_at    | CIITA                              | 1.05 | 2.07 | 5.31E-08 | 1.76E-06 |
| 1559950_at   | FAM66C /// FAM66D                  | 1.05 | 2.07 | 2.04E-04 | 1.28E-03 |
| 229820_at    | LINC00969                          | 1.05 | 2.07 | 4.86E-04 | 2.55E-03 |
| 210889_s_at  | FCGR2B                             | 1.05 | 2.07 | 9.96E-09 | 4.49E-07 |
| 206186_at    | MPP3                               | 1.05 | 2.07 | 3.09E-07 | 7.09E-06 |
| 224451_x_at  | ARHGAP9                            | 1.05 | 2.07 | 1.49E-06 | 2.47E-05 |
| 208733_at    | RAB2A                              | 1.05 | 2.07 | 9.74E-05 | 7.08E-04 |
| 223605_at    | SLC25A18                           | 1.05 | 2.07 | 5.15E-04 | 2.66E-03 |
| 207100_s_at  | VAMP1                              | 1.05 | 2.07 | 1.17E-07 | 3.31E-06 |
| 215116_s_at  | DNM1                               | 1.05 | 2.07 | 3.87E-09 | 2.12E-07 |
| 205337_at    | DCT                                | 1.05 | 2.07 | 1.97E-06 | 3.10E-05 |
| 1555890_at   | OR2A20P /// OR2A9P                 | 1.05 | 2.07 | 2.65E-06 | 3.96E-05 |
| 230563_at    | RASGEF1A                           | 1.05 | 2.07 | 2.50E-05 | 2.40E-04 |
| 1562573_at   | CYP17A1                            | 1.05 | 2.06 | 4.72E-07 | 9.75E-06 |
| 228258_at    | TBC1D10C                           | 1.05 | 2.06 | 3.59E-09 | 2.00E-07 |
| 1564786_at   | LOC338667                          | 1.04 | 2.06 | 6.61E-03 | 2.06E-02 |
| 212613_at    | BTN3A2                             | 1.04 | 2.06 | 1.89E-06 | 3.00E-05 |
| 209905_at    | HOXA10-HOXA9 /// HOXA9 /// MIR196B | 1.04 | 2.06 | 5.88E-06 | 7.45E-05 |
| 205299_s_at  | BTN2A2                             | 1.04 | 2.06 | 2.61E-07 | 6.23E-06 |
| 212444_at    | GPRC5A                             | 1.04 | 2.06 | 1.04E-05 | 1.18E-04 |
| 216701_at    | C1orf68                            | 1.04 | 2.06 | 1.56E-03 | 6.44E-03 |
| 227201_at    | LOC643837                          | 1.04 | 2.06 | 2.62E-07 | 6.23E-06 |
| 205843_x_at  | CRAT                               | 1.04 | 2.06 | 9.05E-04 | 4.17E-03 |
| 235418_at    | FAHD2A                             | 1.04 | 2.06 | 1.98E-08 | 7.89E-07 |
| 205213_at    | ACAP1                              | 1.04 | 2.05 | 1.06E-08 | 4.71E-07 |
| 235574_at    | GBP4                               | 1.04 | 2.05 | 5.88E-08 | 1.92E-06 |
| 213845_at    | GRIK2                              | 1.04 | 2.05 | 2.17E-06 | 3.35E-05 |
| 232617_at    | CTSS                               | 1.04 | 2.05 | 9.83E-09 | 4.45E-07 |
| 229430_at    | C8orf46                            | 1.04 | 2.05 | 2.35E-06 | 3.59E-05 |
| 1552398_a_at | CLEC12A                            | 1.04 | 2.05 | 4.12E-05 | 3.56E-04 |
| 242940_x_at  | DLX6                               | 1.04 | 2.05 | 4.33E-07 | 9.09E-06 |
| 220801_s_at  | HAO2                               | 1.04 | 2.05 | 3.76E-03 | 1.31E-02 |
| 206214_at    | PLA2G7                             | 1.04 | 2.05 | 4.87E-05 | 4.07E-04 |
| 207623_at    | ABCF2                              | 1.03 | 2.05 | 6.86E-09 | 3.35E-07 |
| 223946_at    | MED23                              | 1.03 | 2.05 | 1.93E-07 | 4.89E-06 |
| 210439_at    | ICOS                               | 1.03 | 2.05 | 3.19E-05 | 2.89E-04 |
| 222317_at    | PDE3B                              | 1.03 | 2.04 | 8.88E-03 | 2.61E-02 |
| 207072_at    | IL18RAP                            | 1.03 | 2.04 | 8.04E-06 | 9.57E-05 |
| 209488_s_at  | RBPM5                              | 1.03 | 2.04 | 6.27E-06 | 7.81E-05 |

|              |                 |      |      |          |          |
|--------------|-----------------|------|------|----------|----------|
| 205455_at    | MST1R           | 1.03 | 2.04 | 3.00E-06 | 4.36E-05 |
| 236150_at    | HYKK            | 1.03 | 2.04 | 1.66E-07 | 4.36E-06 |
| 211734_s_at  | FCER1A          | 1.03 | 2.04 | 6.30E-09 | 3.12E-07 |
| 204760_s_at  | NR1D1 /// THRA  | 1.03 | 2.04 | 8.34E-05 | 6.27E-04 |
| 236064_at    | SLC25A35        | 1.03 | 2.04 | 1.63E-05 | 1.69E-04 |
| 31637_s_at   | NR1D1 /// THRA  | 1.03 | 2.04 | 1.92E-05 | 1.94E-04 |
| 219992_at    | TAC3            | 1.03 | 2.04 | 2.36E-04 | 1.44E-03 |
| 1555756_a_at | CLEC7A          | 1.03 | 2.04 | 3.93E-04 | 2.15E-03 |
| 205769_at    | SLC27A2         | 1.02 | 2.03 | 3.15E-04 | 1.81E-03 |
| 211062_s_at  | CPZ /// GPR78   | 1.02 | 2.03 | 6.29E-11 | 6.82E-09 |
| 227168_at    | MIAT            | 1.02 | 2.03 | 1.12E-06 | 1.96E-05 |
| 229497_at    | ANKDD1A         | 1.02 | 2.03 | 4.32E-10 | 3.49E-08 |
| 1554057_at   | ASH1L-AS1       | 1.02 | 2.03 | 7.04E-08 | 2.23E-06 |
| 229241_at    | LDHD            | 1.02 | 2.03 | 4.30E-04 | 2.31E-03 |
| 240183_at    | TMEM213         | 1.02 | 2.03 | 2.62E-03 | 9.79E-03 |
| 1568638_a_at | IDO2            | 1.02 | 2.03 | 2.74E-09 | 1.59E-07 |
| 230220_at    | UNC80           | 1.02 | 2.03 | 1.26E-07 | 3.52E-06 |
| 209994_s_at  | ABCB1 /// ABCB4 | 1.02 | 2.03 | 2.70E-09 | 1.57E-07 |
| 241440_at    | ZIC1            | 1.02 | 2.02 | 1.29E-04 | 8.92E-04 |
| 207561_s_at  | ABCB8 /// ASIC3 | 1.02 | 2.02 | 4.04E-06 | 5.53E-05 |
| 204259_at    | MMP7            | 1.02 | 2.02 | 6.28E-06 | 7.81E-05 |
| 1558770_a_at | PIK3R6          | 1.02 | 2.02 | 2.60E-06 | 3.90E-05 |
| 223562_at    | PARVG           | 1.02 | 2.02 | 9.00E-07 | 1.64E-05 |
| 235719_at    | CYP4V2          | 1.02 | 2.02 | 2.85E-05 | 2.65E-04 |
| 229902_at    | FLT4            | 1.02 | 2.02 | 3.05E-06 | 4.42E-05 |
| 227803_at    | ENPP5           | 1.01 | 2.02 | 8.36E-06 | 9.88E-05 |
| 211909_x_at  | PTGER3          | 1.01 | 2.02 | 6.23E-07 | 1.22E-05 |
| 204179_at    | MB              | 1.01 | 2.02 | 2.18E-06 | 3.37E-05 |
| 214828_s_at  | RRP7A /// RRP7B | 1.01 | 2.02 | 3.33E-04 | 1.89E-03 |
| 1560011_at   | JRK             | 1.01 | 2.02 | 4.34E-08 | 1.49E-06 |
| 229597_s_at  | WDFY4           | 1.01 | 2.02 | 6.63E-07 | 1.28E-05 |
| 204519_s_at  | PLLP            | 1.01 | 2.02 | 5.75E-05 | 4.62E-04 |
| 204939_s_at  | PLN             | 1.01 | 2.02 | 6.20E-03 | 1.96E-02 |
| 1553772_at   | GK5             | 1.01 | 2.02 | 9.49E-08 | 2.77E-06 |
| 236360_at    | FLJ42875        | 1.01 | 2.01 | 9.01E-07 | 1.64E-05 |
| 211685_s_at  | NCALD           | 1.01 | 2.01 | 5.98E-05 | 4.77E-04 |
| 229092_at    | NR2F2           | 1.01 | 2.01 | 8.80E-08 | 2.62E-06 |
| 223121_s_at  | SFRP2           | 1.01 | 2.01 | 2.39E-04 | 1.46E-03 |
| 230417_at    | GALNT16         | 1.01 | 2.01 | 4.60E-08 | 1.56E-06 |
| 209883_at    | COLGALT2        | 1.01 | 2.01 | 3.25E-07 | 7.35E-06 |
| 225491_at    | SLC1A2          | 1.01 | 2.01 | 3.68E-06 | 5.12E-05 |
| 1553890_s_at | NTN5            | 1.01 | 2.01 | 1.83E-05 | 1.86E-04 |
| 238581_at    | GBP5            | 1.01 | 2.01 | 3.33E-05 | 2.99E-04 |

|              |                        |      |      |          |          |
|--------------|------------------------|------|------|----------|----------|
| 227609_at    | EPSTI1                 | 1.01 | 2.01 | 1.44E-04 | 9.74E-04 |
| 201506_at    | TGFBI                  | 1.01 | 2.01 | 2.24E-10 | 2.01E-08 |
| 205671_s_at  | HLA-DOB                | 1    | 2    | 1.18E-04 | 8.29E-04 |
| 238018_at    | FAM150B                | 1    | 2    | 1.10E-05 | 1.23E-04 |
| 208146_s_at  | CPVL                   | 1    | 2    | 8.83E-08 | 2.62E-06 |
| 219562_at    | RAB26                  | 1    | 2    | 4.85E-08 | 1.63E-06 |
| 238114_at    | PCMTD1                 | 0.99 | 8    | 3.17E-09 | 1.79E-07 |
| 202531_at    | IRF1                   | 0.99 | 8    | 1.43E-07 | 3.89E-06 |
| 204852_s_at  | PTPN7                  | 0.99 | 7    | 3.76E-08 | 1.33E-06 |
| 226627_at    | 8-Sep                  | 0.99 | 5    | 1.67E-08 | 6.83E-07 |
| 230169_at    | THAP6                  | 0.99 | 4    | 8.99E-12 | 1.37E-09 |
| 236539_at    | PTPN22                 | 0.99 | 3    | 3.09E-07 | 7.09E-06 |
| 219959_at    | MOCOS                  | 0.99 | 3    | 2.29E-03 | 8.76E-03 |
| 1556427_s_at | LRRN4CL                | 0.99 | 3    | 4.61E-05 | 3.89E-04 |
| 223534_s_at  | RPS6KL1                | 0.99 | 3    | 3.38E-08 | 1.22E-06 |
| 239593_at    | TMEM213                | 0.99 | 3    | 2.86E-03 | 1.05E-02 |
| 1559952_x_at | FAM66C /// FAM66D      | 0.99 | 3    | 3.05E-04 | 1.76E-03 |
| 217557_s_at  | CPM                    | 0.99 | 3    | 8.55E-08 | 2.57E-06 |
| 206601_s_at  | HOXD3                  | 0.99 | 1    | 4.17E-07 | 8.86E-06 |
| 213095_x_at  | AIF1                   | 0.99 | 1.99 | 3.63E-09 | 2.01E-07 |
| 223950_s_at  | FLYWCH1                | 0.98 | 9    | 4.05E-05 | 3.51E-04 |
| 1559050_at   | HCG27 /// LOC100996357 | 0.98 | 8    | 1.18E-08 | 5.16E-07 |
| 225598_at    | SLC45A4                | 0.98 | 8    | 1.50E-07 | 4.04E-06 |
| 242988_at    | DCST2                  | 0.98 | 8    | 6.73E-08 | 2.14E-06 |
| 210163_at    | CXCL11                 | 0.98 | 6    | 2.36E-04 | 1.44E-03 |
| 238545_at    | BRD7                   | 0.98 | 5    | 3.36E-06 | 4.78E-05 |
| 236480_at    | MIR210HG               | 0.98 | 5    | 2.94E-07 | 6.84E-06 |
| 228780_at    | POU3F3                 | 0.98 | 4    | 1.02E-07 | 2.95E-06 |
| 232428_at    | MOGAT2                 | 0.98 | 4    | 2.31E-03 | 8.84E-03 |
| 220559_at    | EN1                    | 0.98 | 4    | 1.31E-08 | 5.56E-07 |
| 244033_at    | CEP128                 | 0.98 | 4    | 1.31E-06 | 2.23E-05 |
| 205306_x_at  | KMO                    | 0.98 | 3    | 5.73E-07 | 1.13E-05 |
| 206707_x_at  | FAM65B                 | 0.98 | 3    | 5.80E-09 | 2.93E-07 |
| 228182_at    | ADCY5                  | 0.98 | 3    | 1.39E-05 | 1.48E-04 |
| 230974_at    | DDX19B                 | 0.98 | 2    | 1.30E-08 | 5.54E-07 |

|              |              |              |      |          |          |
|--------------|--------------|--------------|------|----------|----------|
| 222938_x_at  | ENPP3        | 0.98<br>2    | 1.98 | 1.78E-07 | 4.59E-06 |
| 213822_s_at  | UBE3B        | 0.98<br>2    | 1.98 | 3.82E-05 | 3.34E-04 |
| 226439_s_at  | NBEA         | 0.98<br>1    | 1.97 | 1.05E-06 | 1.86E-05 |
| 1556096_s_at | UNC13C       | 0.98<br>1    | 1.97 | 6.61E-04 | 3.25E-03 |
| 234787_at    | DKFZp564H213 | 0.98         | 1.97 | 1.96E-06 | 3.09E-05 |
| 202510_s_at  | TNFAIP2      | 0.98<br>0.97 | 1.97 | 1.54E-10 | 1.46E-08 |
| 228888_at    | STAC2        | 9<br>0.97    | 1.97 | 4.98E-05 | 4.14E-04 |
| 234722_x_at  | OBP2B        | 9<br>0.97    | 1.97 | 2.85E-05 | 2.65E-04 |
| 236583_at    | GIMAP1       | 9<br>0.97    | 1.97 | 8.80E-07 | 1.61E-05 |
| 231384_at    | GRIN2A       | 8<br>0.97    | 1.97 | 4.07E-05 | 3.52E-04 |
| 212187_x_at  | PTGDS        | 7<br>0.97    | 1.97 | 1.79E-08 | 7.23E-07 |
| 228391_at    | CYP4V2       | 7<br>0.97    | 1.97 | 5.64E-06 | 7.20E-05 |
| 231323_at    | PSMB2        | 7<br>0.97    | 1.97 | 4.10E-06 | 5.61E-05 |
| 238877_at    | EYA4         | 7<br>0.97    | 1.97 | 2.07E-04 | 1.30E-03 |
| 236886_at    | LOC100049716 | 6<br>0.97    | 1.97 | 1.31E-05 | 1.41E-04 |
| 231549_at    | C1orf158     | 6<br>0.97    | 1.97 | 1.09E-02 | 3.08E-02 |
| 236995_x_at  | TFEC         | 6<br>0.97    | 1.97 | 5.16E-07 | 1.04E-05 |
| 1561226_at   | XCR1         | 5<br>0.97    | 1.97 | 7.01E-06 | 8.55E-05 |
| 237870_at    | NQO2         | 5<br>0.97    | 1.97 | 2.01E-04 | 1.27E-03 |
| 226818_at    | MPEG1        | 5<br>0.97    | 1.97 | 8.48E-08 | 2.56E-06 |
| 220276_at    | RERGL        | 3<br>0.97    | 1.96 | 1.75E-03 | 7.07E-03 |
| 230036_at    | SAMD9L       | 3<br>0.97    | 1.96 | 2.78E-07 | 6.53E-06 |
| 228111_s_at  | DNAH1        | 3<br>0.97    | 1.96 | 5.02E-07 | 1.02E-05 |
| 204114_at    | NID2         | 2<br>0.97    | 1.96 | 3.88E-06 | 5.36E-05 |
| 203673_at    | TG           | 1<br>0.97    | 1.96 | 2.89E-05 | 2.67E-04 |
| 213217_at    | ADCY2        | 1<br>0.97    | 1.96 | 3.23E-07 | 7.31E-06 |
| 219211_at    | USP18        | 1<br>0.96    | 1.96 | 2.44E-07 | 5.90E-06 |
| 211005_at    | LAT          | 9<br>0.96    | 1.96 | 7.14E-08 | 2.25E-06 |
| 230405_at    | C5orf56      | 8<br>0.96    | 1.96 | 2.45E-09 | 1.45E-07 |
| 1570020_at   | AACSP1       | 8<br>0.96    | 1.96 | 1.57E-05 | 1.64E-04 |
| 207777_s_at  | SP140        | 7<br>0.96    | 1.96 | 3.56E-08 | 1.27E-06 |
| 1556063_s_at | RPP30        | 7<br>0.96    | 1.95 | 4.00E-09 | 2.18E-07 |
| 239380_at    | C5orf27      | 7<br>0.96    | 1.95 | 2.67E-05 | 2.52E-04 |
| 219574_at    | 1-Mar        | 6<br>0.96    | 1.95 | 1.73E-08 | 7.02E-07 |



|              |           |           |      |          |          |
|--------------|-----------|-----------|------|----------|----------|
| 230453_s_at  | ATP2A3    | 0.96<br>6 | 1.95 | 1.45E-04 | 9.79E-04 |
| 205066_s_at  | ENPP1     | 0.96<br>6 | 1.95 | 7.31E-07 | 1.39E-05 |
| 242286_at    | GRIN2A    | 0.96<br>5 | 1.95 | 2.10E-07 | 5.25E-06 |
| 59697_at     | RAB15     | 0.96<br>4 | 1.95 | 1.06E-07 | 3.01E-06 |
| 228160_at    | LINC00667 | 0.96<br>4 | 1.95 | 4.22E-08 | 1.45E-06 |
| 205997_at    | ADAM28    | 0.96<br>3 | 1.95 | 5.10E-08 | 1.70E-06 |
| 202307_s_at  | TAP1      | 0.96<br>3 | 1.95 | 5.45E-12 | 8.91E-10 |
| 223280_x_at  | MS4A6A    | 0.96<br>2 | 1.95 | 3.06E-07 | 7.06E-06 |
| 205433_at    | BCHE      | 0.96<br>2 | 1.95 | 1.55E-07 | 4.12E-06 |
| 205221_at    | HGD       | 0.96      | 1.95 | 2.24E-03 | 8.62E-03 |
| 204301_at    | KBTBD11   | 0.96      | 1.95 | 1.22E-08 | 5.28E-07 |
| 228494_at    | PPP1R9A   | 0.95<br>9 | 1.94 | 3.65E-04 | 2.03E-03 |
| 205691_at    | SYNGR3    | 0.95<br>9 | 1.94 | 1.28E-06 | 2.19E-05 |
| 240509_s_at  | GREM2     | 0.95<br>7 | 1.94 | 5.61E-05 | 4.54E-04 |
| 242414_at    | QPRT      | 0.95<br>7 | 1.94 | 5.49E-09 | 2.83E-07 |
| 220646_s_at  | KLRF1     | 0.95<br>6 | 1.94 | 8.55E-06 | 1.00E-04 |
| 231773_at    | ANGPTL1   | 0.95<br>6 | 1.94 | 5.55E-07 | 1.10E-05 |
| 227048_at    | LAMA1     | 0.95<br>5 | 1.94 | 7.20E-05 | 5.55E-04 |
| 214746_s_at  | ZNF467    | 0.95<br>4 | 1.94 | 4.34E-05 | 3.70E-04 |
| 206726_at    | HPGDS     | 0.95<br>4 | 1.94 | 3.20E-04 | 1.83E-03 |
| 1555728_a_at | MS4A4A    | 0.95<br>4 | 1.94 | 3.17E-09 | 1.79E-07 |
| 207955_at    | CCL27     | 0.95<br>3 | 1.94 | 4.39E-04 | 2.35E-03 |
| 206199_at    | CEACAM7   | 0.95<br>2 | 1.93 | 1.62E-03 | 6.64E-03 |
| 225285_at    | BCAT1     | 0.95<br>1 | 1.93 | 1.01E-05 | 1.15E-04 |
| 210140_at    | CST7      | 0.95<br>1 | 1.93 | 2.52E-04 | 1.52E-03 |
| 235050_at    | SLC2A12   | 0.95      | 1.93 | 2.14E-06 | 3.32E-05 |
| 211012_s_at  | PML       | 0.95      | 1.93 | 2.05E-09 | 1.25E-07 |
| 235742_at    | RHOC      | 0.94<br>9 | 1.93 | 3.84E-08 | 1.35E-06 |
| 213603_s_at  | RAC2      | 0.94<br>9 | 1.93 | 4.49E-08 | 1.53E-06 |
| 212587_s_at  | PTPRC     | 0.94<br>9 | 1.93 | 1.26E-05 | 1.37E-04 |
| 227196_at    | RHPN2     | 0.94<br>9 | 1.93 | 3.10E-04 | 1.79E-03 |
| 227867_at    | TRABD2A   | 0.94<br>8 | 1.93 | 6.07E-06 | 7.64E-05 |
| 231093_at    | FCRL3     | 0.94<br>7 | 1.93 | 2.45E-04 | 1.48E-03 |
| 218322_s_at  | ACSL5     | 0.94<br>7 | 1.93 | 3.31E-07 | 7.43E-06 |

|              |                  |           |      |          |          |
|--------------|------------------|-----------|------|----------|----------|
| 1552634_a_at | ZNF101           | 0.94<br>7 | 1.93 | 1.95E-06 | 3.07E-05 |
| 207376_at    | VENTX            | 0.94<br>6 | 1.93 | 1.72E-07 | 4.46E-06 |
| 204499_at    | AGTPBP1          | 0.94<br>5 | 1.93 | 2.31E-08 | 9.04E-07 |
| 229002_at    | FAM69B           | 0.94<br>5 | 1.93 | 4.04E-04 | 2.20E-03 |
| 239349_at    | C1QTNF7          | 0.94<br>4 | 1.92 | 1.66E-04 | 1.09E-03 |
| 1568794_at   | LOC643355        | 0.94<br>4 | 1.92 | 3.04E-04 | 1.76E-03 |
| 206060_s_at  | PTPN22           | 0.94<br>3 | 1.92 | 7.42E-07 | 1.41E-05 |
| 229866_at    | STK32A           | 0.94<br>2 | 1.92 | 2.70E-04 | 1.60E-03 |
| 236253_at    | ZNF546           | 0.94<br>1 | 1.92 | 9.05E-07 | 1.65E-05 |
| 230143_at    | RNF165           | 0.94      | 1.92 | 2.41E-07 | 5.85E-06 |
| 219056_at    | RNASEH2B         | 0.94      | 1.92 | 3.66E-08 | 1.30E-06 |
| 211748_x_at  | PTGDS            | 0.93<br>9 | 1.92 | 3.75E-10 | 3.13E-08 |
| 226702_at    | CMPK2            | 0.93<br>9 | 1.92 | 3.24E-07 | 7.32E-06 |
| 214087_s_at  | MYBPC1           | 0.93<br>9 | 1.92 | 7.10E-04 | 3.43E-03 |
| 232195_at    | GPR158           | 0.93<br>9 | 1.92 | 9.17E-05 | 6.76E-04 |
| 236436_at    | SLC25A45         | 0.93<br>9 | 1.92 | 2.61E-09 | 1.53E-07 |
| 239183_at    | ANGPTL1          | 0.93<br>8 | 1.92 | 7.53E-08 | 2.33E-06 |
| 228821_at    | ST6GAL2          | 0.93<br>7 | 1.91 | 9.92E-05 | 7.19E-04 |
| 219054_at    | NPR3             | 0.93<br>7 | 1.91 | 5.62E-06 | 7.18E-05 |
| 1553311_at   | C20orf197        | 0.93<br>6 | 1.91 | 2.56E-06 | 3.84E-05 |
| 203828_s_at  | IL32             | 0.93<br>6 | 1.91 | 6.36E-06 | 7.89E-05 |
| 203104_at    | CSF1R            | 0.93<br>6 | 1.91 | 2.69E-09 | 1.57E-07 |
| 1554906_a_at | MPHOSPH6         | 0.93<br>6 | 1.91 | 3.36E-04 | 1.90E-03 |
| 208450_at    | LGALS2           | 0.93<br>5 | 1.91 | 4.68E-04 | 2.48E-03 |
| 1558934_a_at | GTF2H5           | 0.93<br>5 | 1.91 | 3.02E-06 | 4.38E-05 |
| 203281_s_at  | MIR5193 /// UBA7 | 0.93<br>4 | 1.91 | 8.04E-09 | 3.82E-07 |
| 219213_at    | JAM2             | 0.93<br>4 | 1.91 | 1.71E-07 | 4.45E-06 |
| 220428_at    | CD207            | 0.93<br>3 | 1.91 | 3.27E-06 | 4.66E-05 |
| 206539_s_at  | CYP4F12          | 0.93<br>3 | 1.91 | 3.15E-05 | 2.86E-04 |
| 208189_s_at  | MYO7A            | 0.93<br>3 | 1.91 | 1.04E-07 | 2.98E-06 |
| 236331_at    | CDKL2            | 0.93<br>2 | 1.91 | 1.52E-03 | 6.31E-03 |
| 1555786_s_at | LINC00520        | 0.93<br>2 | 1.91 | 7.68E-03 | 2.33E-02 |
| 226553_at    | TMPRSS2          | 0.93<br>2 | 1.91 | 7.88E-04 | 3.73E-03 |
| 203402_at    | KCNAB2           | 0.93<br>2 | 1.91 | 6.79E-10 | 5.11E-08 |

|              |                     |              |      |          |          |
|--------------|---------------------|--------------|------|----------|----------|
| 232234_at    | SLA2                | 0.93<br>2    | 1.91 | 5.51E-07 | 1.10E-05 |
| 205403_at    | IL1R2               | 0.93<br>1    | 1.91 | 4.61E-09 | 2.43E-07 |
| 1559590_at   | CHDH                | 0.93<br>1    | 1.91 | 9.21E-10 | 6.43E-08 |
| 226612_at    | UBE2QL1             | 0.93         | 1.91 | 4.00E-07 | 8.60E-06 |
| 230873_at    | TTL3                | 0.93<br>0.92 | 1.9  | 1.72E-04 | 1.12E-03 |
| 239273_s_at  | MMP28               | 9<br>0.92    | 1.9  | 3.92E-06 | 5.40E-05 |
| 239785_at    | DZIP1L              | 8<br>0.92    | 1.9  | 1.84E-09 | 1.15E-07 |
| 228847_at    | EXOC3               | 7<br>0.92    | 1.9  | 3.05E-07 | 7.04E-06 |
| 229222_at    | ACSS3               | 7<br>0.92    | 1.9  | 1.49E-06 | 2.48E-05 |
| 1554122_a_at | HSD17B12            | 6<br>0.92    | 1.9  | 3.04E-03 | 1.10E-02 |
| 211742_s_at  | EVI2B               | 6<br>0.92    | 1.9  | 4.17E-07 | 8.86E-06 |
| 1556300_s_at | SIM1                | 5<br>0.92    | 1.9  | 7.60E-07 | 1.43E-05 |
| 1564276_at   | C5orf56             | 5<br>0.92    | 1.9  | 8.03E-07 | 1.50E-05 |
| 208195_at    | TTN                 | 5<br>0.92    | 1.9  | 9.00E-07 | 1.64E-05 |
| 236154_at    | QKI                 | 3<br>0.92    | 1.9  | 8.43E-07 | 1.56E-05 |
| 214012_at    | ERAP1               | 3<br>0.92    | 1.9  | 8.81E-04 | 4.08E-03 |
| 204220_at    | GMFG                | 3<br>0.92    | 1.9  | 3.38E-08 | 1.22E-06 |
| 229052_at    | ANKRD23 /// ANKRD39 | 3<br>0.92    | 1.9  | 1.10E-06 | 1.93E-05 |
| 218066_at    | SLC12A7             | 3<br>0.92    | 1.9  | 6.58E-08 | 2.10E-06 |
| 208121_s_at  | PTPRO               | 2<br>0.92    | 1.89 | 1.67E-07 | 4.37E-06 |
| 230847_at    | WRNIP1              | 1<br>0.92    | 1.89 | 2.49E-06 | 3.75E-05 |
| 213160_at    | DOCK2               | 1<br>0.92    | 1.89 | 4.41E-08 | 1.51E-06 |
| 244363_at    | ROS1                | 1<br>0.92    | 1.89 | 2.59E-03 | 9.67E-03 |
| 206026_s_at  | TNFAIP6             | 1<br>0.92    | 1.89 | 1.50E-05 | 1.58E-04 |
| 204130_at    | HSD11B2             | 1            | 1.89 | 3.61E-07 | 7.94E-06 |
| 230616_at    | LAMB2P1             | 0.92         | 1.89 | 2.47E-08 | 9.53E-07 |
| 243027_at    | IGSF5               | 0.92         | 1.89 | 1.09E-05 | 1.23E-04 |
| 226955_at    | AFAP1L1             | 0.92         | 1.89 | 5.88E-06 | 7.45E-05 |
| 205593_s_at  | PDE9A               | 0.92         | 1.89 | 5.81E-05 | 4.66E-04 |
| 1568696_at   | CDNF                | 0.91<br>8    | 1.89 | 5.58E-06 | 7.13E-05 |
| 205225_at    | ESR1                | 8<br>0.91    | 1.89 | 1.63E-07 | 4.30E-06 |
| 209976_s_at  | CYP2E1              | 7<br>0.91    | 1.89 | 9.60E-07 | 1.73E-05 |
| 223655_at    | CD163L1             | 7<br>0.91    | 1.89 | 2.48E-10 | 2.20E-08 |
| 210215_at    | TFR2                | 7<br>0.91    | 1.89 | 5.85E-08 | 1.92E-06 |
| 213418_at    | HSPA6               | 7            | 1.89 | 6.15E-06 | 7.71E-05 |

|              |                      |           |      |          |          |
|--------------|----------------------|-----------|------|----------|----------|
| 230962_at    | DCLK1                | 0.91<br>7 | 1.89 | 8.96E-05 | 6.64E-04 |
| 210253_at    | HTATIP2              | 0.91<br>7 | 1.89 | 1.73E-06 | 2.78E-05 |
| 234994_at    | TMEM200A             | 0.91<br>6 | 1.89 | 3.25E-05 | 2.93E-04 |
| 1553454_at   | RPTN                 | 0.91<br>5 | 1.89 | 5.28E-05 | 4.34E-04 |
| 202357_s_at  | CFB                  | 0.91<br>5 | 1.89 | 1.54E-07 | 4.12E-06 |
| 204774_at    | EVI2A                | 0.91<br>5 | 1.89 | 1.00E-05 | 1.15E-04 |
| 213309_at    | PLCL2                | 0.91<br>5 | 1.89 | 3.42E-07 | 7.61E-06 |
| 230941_at    | LOC728537            | 0.91<br>5 | 1.89 | 1.53E-05 | 1.61E-04 |
| 226611_s_at  | CENPV                | 0.91<br>5 | 1.89 | 4.85E-07 | 9.99E-06 |
| 210538_s_at  | BIRC3                | 0.91<br>5 | 1.89 | 4.84E-04 | 2.54E-03 |
| 207067_s_at  | HDC                  | 0.91<br>5 | 1.89 | 2.63E-04 | 1.57E-03 |
| 214186_s_at  | HCG26                | 0.91<br>5 | 1.89 | 1.95E-06 | 3.07E-05 |
| 205859_at    | LY86                 | 0.91<br>4 | 1.88 | 1.90E-05 | 1.92E-04 |
| 231195_at    | KLRG2                | 0.91<br>4 | 1.88 | 3.50E-05 | 3.11E-04 |
| 205660_at    | OASL                 | 0.91<br>4 | 1.88 | 1.23E-06 | 2.13E-05 |
| 228724_at    | TTLL7                | 0.91<br>4 | 1.88 | 1.92E-05 | 1.93E-04 |
| 227174_at    | WDR72                | 0.91<br>4 | 1.88 | 2.50E-03 | 9.39E-03 |
| 211740_at    | ICA1                 | 0.91<br>3 | 1.88 | 2.27E-03 | 8.70E-03 |
| 232300_at    | ADIRF-AS1            | 0.91<br>3 | 1.88 | 3.26E-05 | 2.94E-04 |
| 204575_s_at  | MMP19                | 0.91<br>1 | 1.88 | 1.83E-07 | 4.69E-06 |
| 1552316_a_at | GIMAP1               | 0.91<br>1 | 1.88 | 5.38E-05 | 4.39E-04 |
| 232083_at    | KIF16B               | 0.90<br>9 | 1.88 | 1.75E-04 | 1.14E-03 |
| 205619_s_at  | MEOX1                | 0.90<br>9 | 1.88 | 8.84E-08 | 2.63E-06 |
| 219531_at    | CEP72                | 0.90<br>9 | 1.88 | 3.22E-05 | 2.91E-04 |
| 230636_s_at  | KLF9                 | 0.90<br>8 | 1.88 | 9.69E-08 | 2.82E-06 |
| 231930_at    | ELMOD1 /// LOC643923 | 0.90<br>8 | 1.88 | 4.43E-04 | 2.37E-03 |
| 242392_at    | UBE2U                | 0.90<br>7 | 1.88 | 6.79E-03 | 2.10E-02 |
| 226500_at    | ZBTB47               | 0.90<br>6 | 1.87 | 3.02E-10 | 2.60E-08 |
| 206552_s_at  | TAC1                 | 0.90<br>6 | 1.87 | 6.14E-04 | 3.07E-03 |
| 229631_at    | DNHD1                | 0.90<br>5 | 1.87 | 8.40E-07 | 1.55E-05 |
| 215967_s_at  | LY9                  | 0.90<br>5 | 1.87 | 7.18E-08 | 2.26E-06 |
| 236950_s_at  | LINC00964            | 0.90<br>5 | 1.87 | 1.44E-05 | 1.52E-04 |
| 204829_s_at  | FOLR2                | 0.90<br>5 | 1.87 | 1.92E-06 | 3.03E-05 |

|              |                                                  |             |      |          |          |
|--------------|--------------------------------------------------|-------------|------|----------|----------|
| 89977_at     | ACSM5                                            | 0.90<br>5   | 1.87 | 8.49E-05 | 6.36E-04 |
| 219610_at    | ARHGEF28                                         | 0.90<br>4   | 1.87 | 1.50E-09 | 9.61E-08 |
| 239846_at    | MTHFD1                                           | 0.90<br>4   | 1.87 | 1.02E-06 | 1.81E-05 |
| 236565_s_at  | LARP6                                            | 0.90<br>3   | 1.87 | 3.47E-04 | 1.94E-03 |
| 1556839_s_at | LOC100289090                                     | 0.90<br>3   | 1.87 | 1.13E-03 | 4.98E-03 |
| 244385_at    | KDM4C                                            | 0.90<br>3   | 1.87 | 2.00E-05 | 2.00E-04 |
| 219594_at    | NINJ2                                            | 0.90<br>2   | 1.87 | 3.80E-07 | 8.28E-06 |
| 215051_x_at  | AIF1                                             | 0.90<br>2   | 1.87 | 7.33E-09 | 3.54E-07 |
| 1555865_at   | TOLLIP-AS1                                       | 0.90<br>2   | 1.87 | 1.65E-06 | 2.69E-05 |
| 229019_at    | ZNF385B                                          | 0.90<br>1   | 1.87 | 3.57E-04 | 1.99E-03 |
| 221087_s_at  | APOL3                                            | 0.90<br>1   | 1.87 | 1.03E-08 | 4.61E-07 |
| 1560697_at   | TRHDE-AS1                                        | 0.90<br>1   | 1.87 | 1.64E-04 | 1.08E-03 |
| 207547_s_at  | FAM107A /// LOC101059937                         | 0.9         | 1.87 | 2.55E-07 | 6.10E-06 |
| 213489_at    | MAPRE2                                           | 0.9<br>0.89 | 1.87 | 3.88E-08 | 1.36E-06 |
| 214945_at    | FAM153A /// FAM153B /// FAM153C /// LOC100507387 | 9<br>0.89   | 1.86 | 9.89E-03 | 2.85E-02 |
| 242656_at    | GTF2H1                                           | 9<br>0.89   | 1.86 | 4.20E-06 | 5.71E-05 |
| 226811_at    | FAM46C                                           | 8<br>0.89   | 1.86 | 1.29E-05 | 1.40E-04 |
| 229537_at    | LMO4                                             | 8<br>0.89   | 1.86 | 5.43E-07 | 1.09E-05 |
| 228150_at    | SEC16B                                           | 8<br>0.89   | 1.86 | 1.71E-08 | 6.94E-07 |
| 230277_at    | LOC100289187                                     | 7<br>0.89   | 1.86 | 6.93E-08 | 2.20E-06 |
| 209685_s_at  | PRKCB                                            | 7<br>0.89   | 1.86 | 3.30E-08 | 1.20E-06 |
| 215446_s_at  | LOX                                              | 7<br>0.89   | 1.86 | 5.09E-07 | 1.03E-05 |
| 239007_at    | ZNF616                                           | 6<br>0.89   | 1.86 | 9.78E-06 | 1.12E-04 |
| 204717_s_at  | SLC29A2                                          | 6<br>0.89   | 1.86 | 1.55E-07 | 4.12E-06 |
| 208018_s_at  | HCK                                              | 6<br>0.89   | 1.86 | 1.36E-08 | 5.70E-07 |
| 232543_x_at  | ARHGAP9                                          | 6<br>0.89   | 1.86 | 2.61E-07 | 6.22E-06 |
| 206856_at    | LILRB5                                           | 6<br>0.89   | 1.86 | 9.34E-06 | 1.08E-04 |
| 213326_at    | VAMP1                                            | 5<br>0.89   | 1.86 | 4.18E-07 | 8.87E-06 |
| 205518_s_at  | CMAHP                                            | 5<br>0.89   | 1.86 | 9.64E-06 | 1.11E-04 |
| 224356_x_at  | MS4A6A                                           | 5<br>0.89   | 1.86 | 1.62E-06 | 2.65E-05 |
| 225701_at    | AKNA                                             | 5<br>0.89   | 1.86 | 3.01E-08 | 1.13E-06 |
| 230766_at    | GART                                             | 5<br>0.89   | 1.86 | 2.37E-06 | 3.61E-05 |
| 213733_at    | MYO1F                                            | 4<br>0.89   | 1.86 | 1.49E-08 | 6.22E-07 |
| 219505_at    | CECR1                                            | 4           | 1.86 | 1.87E-04 | 1.20E-03 |

|             |                                                                                                                                                                                 |           |      |          |          |
|-------------|---------------------------------------------------------------------------------------------------------------------------------------------------------------------------------|-----------|------|----------|----------|
| 229400_at   | HOXD10                                                                                                                                                                          | 0.89<br>4 | 1.86 | 6.08E-05 | 4.84E-04 |
| 243690_at   | TRIOBP                                                                                                                                                                          | 0.89<br>4 | 1.86 | 1.47E-08 | 6.16E-07 |
| 226992_at   | NOSTRIN                                                                                                                                                                         | 0.89<br>4 | 1.86 | 1.26E-04 | 8.78E-04 |
| 208072_s_at | DGKD                                                                                                                                                                            | 0.89<br>3 | 1.86 | 5.29E-11 | 5.91E-09 |
| 242557_at   | ZNRD1-AS1                                                                                                                                                                       | 0.89<br>3 | 1.86 | 3.54E-03 | 1.25E-02 |
| 214307_at   | HGD                                                                                                                                                                             | 0.89<br>2 | 1.86 | 3.39E-04 | 1.91E-03 |
| 244276_at   | KLB                                                                                                                                                                             | 0.89<br>1 | 1.85 | 1.86E-04 | 1.19E-03 |
| 227412_at   | PPP1R3E                                                                                                                                                                         | 0.89<br>1 | 1.85 | 1.05E-08 | 4.70E-07 |
| 236518_at   | KIAA1984                                                                                                                                                                        | 0.89<br>1 | 1.85 | 7.76E-08 | 2.39E-06 |
| 228132_at   | ABLIM2                                                                                                                                                                          | 0.89      | 1.85 | 3.19E-08 | 1.17E-06 |
| 211372_s_at | IL1R2                                                                                                                                                                           | 0.89      | 1.85 | 2.29E-05 | 2.23E-04 |
| 201037_at   | PFKP                                                                                                                                                                            | 0.89      | 1.85 | 9.02E-10 | 6.34E-08 |
| 220073_s_at | PLEKHG6                                                                                                                                                                         | 0.89      | 1.85 | 2.69E-07 | 6.38E-06 |
| 243606_at   | NXPE3                                                                                                                                                                           | 0.89      | 1.85 | 1.91E-07 | 4.87E-06 |
| 228218_at   | LSAMP                                                                                                                                                                           | 0.89      | 1.85 | 2.29E-05 | 2.23E-04 |
| 230360_at   | GLDN                                                                                                                                                                            | 0.88<br>9 | 1.85 | 6.71E-09 | 3.29E-07 |
| 215332_s_at | CD8B /// LOC100996919                                                                                                                                                           | 0.88<br>9 | 1.85 | 1.99E-06 | 3.12E-05 |
| 224357_s_at | MS4A4A                                                                                                                                                                          | 0.88<br>9 | 1.85 | 8.22E-07 | 1.53E-05 |
| 225379_at   | MAPT                                                                                                                                                                            | 0.88<br>8 | 1.85 | 4.61E-08 | 1.57E-06 |
| 1552302_at  | TMEM106A                                                                                                                                                                        | 0.88<br>8 | 1.85 | 2.92E-06 | 4.27E-05 |
| 233880_at   | RNF213                                                                                                                                                                          | 0.88<br>8 | 1.85 | 8.29E-08 | 2.51E-06 |
| 204735_at   | PDE4A                                                                                                                                                                           | 0.88<br>7 | 1.85 | 3.79E-10 | 3.14E-08 |
| 206710_s_at | EPB41L3                                                                                                                                                                         | 0.88<br>6 | 1.85 | 7.27E-09 | 3.52E-07 |
| 204057_at   | IRF8                                                                                                                                                                            | 0.88<br>6 | 1.85 | 1.19E-04 | 8.39E-04 |
| 210674_s_at | PCDHA1 /// PCDHA10 /// PCDHA11 /// PCDHA12 ///<br>PCDHA13 /// PCDHA2 /// PCDHA3 /// PCDHA4 ///<br>PCDHA5 /// PCDHA6 /// PCDHA7 /// PCDHA8 /// PCDHA9<br>/// PCDHAC1 /// PCDHAC2 | 0.88<br>5 | 1.85 | 3.13E-05 | 2.85E-04 |
| 205860_x_at | FOLH1 /// FOLH1B                                                                                                                                                                | 0.88<br>5 | 1.85 | 3.32E-05 | 2.98E-04 |
| 202952_s_at | ADAM12                                                                                                                                                                          | 0.88<br>4 | 1.85 | 2.36E-05 | 2.29E-04 |
| 211776_s_at | EPB41L3                                                                                                                                                                         | 0.88<br>4 | 1.85 | 1.80E-10 | 1.67E-08 |
| 230480_at   | PIWIL4                                                                                                                                                                          | 0.88<br>4 | 1.84 | 2.68E-05 | 2.53E-04 |
| 203547_at   | CD4                                                                                                                                                                             | 0.88<br>4 | 1.84 | 7.68E-10 | 5.57E-08 |
| 205609_at   | ANGPT1                                                                                                                                                                          | 0.88<br>3 | 1.84 | 7.18E-06 | 8.71E-05 |
| 1560531_at  | LCE1B                                                                                                                                                                           | 0.88<br>3 | 1.84 | 2.74E-05 | 2.56E-04 |
| 210380_s_at | CACNA1G                                                                                                                                                                         | 0.88<br>3 | 1.84 | 5.78E-07 | 1.14E-05 |
| 225973_at   | TAP2                                                                                                                                                                            | 0.88<br>2 | 1.84 | 1.73E-07 | 4.48E-06 |

|             |                         |           |      |          |          |
|-------------|-------------------------|-----------|------|----------|----------|
| 204940_at   | PLN                     | 0.88<br>1 | 1.84 | 3.28E-03 | 1.17E-02 |
| 231003_at   | SLC35B3                 | 0.88<br>1 | 1.84 | 1.79E-06 | 2.87E-05 |
| 219615_s_at | KCNK5                   | 0.88      | 1.84 | 4.90E-04 | 2.56E-03 |
| 218864_at   | TNS1                    | 0.88      | 1.84 | 1.40E-05 | 1.49E-04 |
| 236124_at   | LOC153546               | 0.88      | 1.84 | 1.97E-05 | 1.98E-04 |
| 219106_s_at | KLHL41                  | 0.87<br>9 | 1.84 | 9.90E-07 | 1.77E-05 |
| 219690_at   | IGFLR1                  | 0.87<br>9 | 1.84 | 1.80E-07 | 4.63E-06 |
| 208964_s_at | FADS1 /// MIR1908       | 0.87<br>9 | 1.84 | 1.63E-02 | 4.25E-02 |
| 235780_at   | PRKACB                  | 0.87<br>8 | 1.84 | 3.09E-06 | 4.46E-05 |
| 230673_at   | PKHD1L1                 | 0.87<br>8 | 1.84 | 4.70E-07 | 9.72E-06 |
| 223816_at   | SLC46A2                 | 0.87<br>8 | 1.84 | 6.66E-05 | 5.21E-04 |
| 230488_s_at | DBH-AS1                 | 0.87<br>8 | 1.84 | 1.13E-07 | 3.21E-06 |
| 204563_at   | SELL                    | 0.87<br>7 | 1.84 | 3.46E-04 | 1.94E-03 |
| 231261_at   | CATSPERG                | 0.87<br>6 | 1.84 | 9.93E-08 | 2.87E-06 |
| 240430_at   | KCMF1                   | 0.87<br>6 | 1.84 | 4.23E-08 | 1.45E-06 |
| 228845_at   | PLBD2                   | 0.87<br>6 | 1.83 | 9.94E-12 | 1.47E-09 |
| 236055_at   | DQX1                    | 0.87<br>6 | 1.83 | 3.94E-05 | 3.44E-04 |
| 218345_at   | TMEM176A                | 0.87<br>5 | 1.83 | 4.16E-05 | 3.59E-04 |
| 232593_at   | NEURL3                  | 0.87<br>5 | 1.83 | 2.13E-07 | 5.31E-06 |
| 228167_at   | KLHL6                   | 0.87<br>5 | 1.83 | 4.89E-06 | 6.44E-05 |
| 220595_at   | PDZRN4                  | 0.87<br>5 | 1.83 | 1.94E-04 | 1.23E-03 |
| 218865_at   | 1-Mar                   | 0.87<br>4 | 1.83 | 1.25E-03 | 5.39E-03 |
| 206068_s_at | ACADL                   | 0.87<br>4 | 1.83 | 7.63E-06 | 9.17E-05 |
| 205456_at   | CD3E                    | 0.87<br>3 | 1.83 | 3.45E-06 | 4.87E-05 |
| 235372_at   | FCRLA                   | 0.87<br>3 | 1.83 | 2.20E-07 | 5.46E-06 |
| 209695_at   | PTP4A3                  | 0.87<br>3 | 1.83 | 2.43E-06 | 3.68E-05 |
| 239787_at   | KCTD4                   | 0.87<br>3 | 1.83 | 5.35E-03 | 1.75E-02 |
| 222253_s_at | LOC727983 /// POM121L9P | 0.87<br>3 | 1.83 | 2.46E-03 | 9.29E-03 |
| 204529_s_at | TOX                     | 0.87<br>3 | 1.83 | 2.38E-05 | 2.30E-04 |
| 217630_at   | ANGEL2                  | 0.87<br>2 | 1.83 | 1.59E-05 | 1.66E-04 |
| 241395_at   | NIT1                    | 0.87<br>2 | 1.83 | 1.10E-06 | 1.92E-05 |
| 228448_at   | MAP6                    | 0.87<br>1 | 1.83 | 5.77E-08 | 1.90E-06 |
| 227877_at   | ANXA2R                  | 0.87      | 1.83 | 7.73E-09 | 3.69E-07 |
| 203332_s_at | INPP5D                  | 0.87      | 1.83 | 2.79E-09 | 1.61E-07 |
| 225165_at   | PPP1R1B                 | 0.87      | 1.83 | 5.47E-05 | 4.45E-04 |

|             |                                                            |           |      |          |          |
|-------------|------------------------------------------------------------|-----------|------|----------|----------|
| 229857_s_at | KANSL1-AS1                                                 | 0.86<br>9 | 1.83 | 7.04E-03 | 2.17E-02 |
| 202982_s_at | ACOT1 /// ACOT2                                            | 0.86<br>9 | 1.83 | 3.21E-03 | 1.15E-02 |
| 230388_s_at | KANSL1-AS1                                                 | 0.86<br>8 | 1.83 | 3.58E-03 | 1.26E-02 |
| 227563_at   | FAM27E3                                                    | 0.86<br>8 | 1.82 | 4.36E-05 | 3.71E-04 |
| 225909_at   | LOC728743 /// ZNF775                                       | 0.86<br>8 | 1.82 | 1.06E-06 | 1.88E-05 |
| 204685_s_at | ATP2B2                                                     | 0.86<br>8 | 1.82 | 4.75E-06 | 6.29E-05 |
| 203932_at   | HLA-DMB                                                    | 0.86<br>7 | 1.82 | 1.40E-11 | 1.96E-09 |
| 202086_at   | MX1                                                        | 0.86<br>7 | 1.82 | 1.03E-05 | 1.17E-04 |
| 219773_at   | NOX4                                                       | 0.86<br>7 | 1.82 | 4.02E-05 | 3.49E-04 |
| 211343_s_at | COL13A1                                                    | 0.86<br>6 | 1.82 | 8.86E-09 | 4.11E-07 |
| 204670_x_at | HLA-DRB1 /// HLA-DRB4 /// LOC100507709 ///<br>LOC100507714 | 0.86<br>6 | 1.82 | 2.98E-07 | 6.91E-06 |
| 213245_at   | ADCY1                                                      | 0.86<br>6 | 1.82 | 6.25E-05 | 4.95E-04 |
| 226219_at   | ARHGAP30                                                   | 0.86<br>6 | 1.82 | 1.26E-08 | 5.42E-07 |
| 226632_at   | CYGB                                                       | 0.86<br>5 | 1.82 | 2.57E-06 | 3.86E-05 |
| 203766_s_at | LMOD1                                                      | 0.86<br>5 | 1.82 | 2.73E-04 | 1.61E-03 |
| 244334_at   | TRAM1L1                                                    | 0.86<br>4 | 1.82 | 5.32E-07 | 1.07E-05 |
| 202156_s_at | CELF2                                                      | 0.86<br>4 | 1.82 | 1.76E-07 | 4.54E-06 |
| 204336_s_at | RGS19                                                      | 0.86<br>4 | 1.82 | 2.23E-06 | 3.44E-05 |
| 1562247_at  | LOC286058                                                  | 0.86<br>3 | 1.82 | 4.50E-06 | 6.03E-05 |
| 227015_at   | ASPHD2                                                     | 0.86<br>3 | 1.82 | 1.93E-06 | 3.05E-05 |
| 1556471_at  | SCML4                                                      | 0.86<br>3 | 1.82 | 3.02E-06 | 4.38E-05 |
| 206600_s_at | SLC16A5                                                    | 0.86<br>2 | 1.82 | 3.03E-06 | 4.39E-05 |
| 202938_x_at | RRP7A /// RRP7B                                            | 0.86<br>1 | 1.82 | 1.66E-03 | 6.75E-03 |
| 231911_at   | ERMN                                                       | 0.86<br>1 | 1.82 | 4.92E-08 | 1.65E-06 |
| 206930_at   | GLYAT                                                      | 0.86<br>1 | 1.82 | 1.32E-02 | 3.58E-02 |
| 215363_x_at | FOLH1 /// FOLH1B                                           | 0.86<br>1 | 1.82 | 2.19E-05 | 2.16E-04 |
| 229454_at   | BCLAF1                                                     | 0.86<br>1 | 1.82 | 3.28E-08 | 1.20E-06 |
| 226841_at   | MPEG1                                                      | 0.86<br>1 | 1.82 | 7.50E-08 | 2.33E-06 |
| 221272_s_at | C1orf21                                                    | 0.86<br>1 | 1.81 | 5.67E-08 | 1.87E-06 |
| 230805_at   | MIR142                                                     | 0.85<br>9 | 1.81 | 2.06E-08 | 8.18E-07 |
| 218400_at   | OAS3                                                       | 0.85<br>9 | 1.81 | 2.48E-06 | 3.75E-05 |
| 244680_at   | GLRB                                                       | 0.85<br>9 | 1.81 | 2.31E-05 | 2.25E-04 |
| 204376_at   | VPRBP                                                      | 0.85<br>8 | 1.81 | 1.26E-10 | 1.23E-08 |
| 229450_at   | IFIT3                                                      | 0.85<br>8 | 1.81 | 5.62E-07 | 1.12E-05 |



|              |                      |           |      |          |          |
|--------------|----------------------|-----------|------|----------|----------|
| 39763_at     | HPX                  | 0.85<br>7 | 1.81 | 1.19E-05 | 1.31E-04 |
| 235528_at    | GUCA1B               | 0.85<br>7 | 1.81 | 4.48E-07 | 9.35E-06 |
| 236927_at    | SVEP1                | 0.85<br>7 | 1.81 | 8.28E-06 | 9.81E-05 |
| 214210_at    | SLC25A17             | 0.85<br>7 | 1.81 | 2.32E-08 | 9.06E-07 |
| 219471_at    | KIAA0226L            | 0.85<br>7 | 1.81 | 4.83E-06 | 6.38E-05 |
| 230782_at    | SORD                 | 0.85<br>6 | 1.81 | 8.05E-07 | 1.50E-05 |
| 211106_at    | SUPT3H               | 0.85<br>6 | 1.81 | 2.52E-04 | 1.52E-03 |
| 209375_at    | XPC                  | 0.85<br>6 | 1.81 | 3.87E-07 | 8.39E-06 |
| 223423_at    | GPR160               | 0.85<br>6 | 1.81 | 7.08E-06 | 8.61E-05 |
| 230145_at    | DUS3L                | 0.85<br>4 | 1.81 | 5.68E-06 | 7.23E-05 |
| 218876_at    | TPPP3                | 0.85<br>4 | 1.81 | 5.06E-04 | 2.63E-03 |
| 241456_at    | FAM78B               | 0.85<br>4 | 1.81 | 1.08E-05 | 1.21E-04 |
| 242013_at    | BCL2L15              | 0.85<br>4 | 1.81 | 9.61E-06 | 1.11E-04 |
| 205439_at    | GSTT2                | 0.85<br>4 | 1.81 | 1.83E-02 | 4.65E-02 |
| 214719_at    | SLC46A3              | 0.85<br>4 | 1.81 | 8.63E-09 | 4.01E-07 |
| 226622_at    | MUC20                | 0.85<br>4 | 1.81 | 5.80E-03 | 1.86E-02 |
| 236031_x_at  | FREM1                | 0.85<br>3 | 1.81 | 3.64E-07 | 8.00E-06 |
| 244110_at    | KMT2A                | 0.85<br>3 | 1.81 | 5.04E-04 | 2.61E-03 |
| 235122_at    | HIVEP3               | 0.85<br>2 | 1.81 | 6.67E-05 | 5.21E-04 |
| 36030_at     | IFFO1                | 0.85<br>2 | 1.8  | 1.41E-07 | 3.83E-06 |
| 214240_at    | GAL                  | 0.85<br>2 | 1.8  | 1.82E-02 | 4.64E-02 |
| 204938_s_at  | PLN                  | 0.85<br>1 | 1.8  | 1.02E-03 | 4.58E-03 |
| 209245_s_at  | KIF1C                | 0.85<br>1 | 1.8  | 1.64E-07 | 4.31E-06 |
| 204785_x_at  | IFNAR2               | 0.85<br>1 | 1.8  | 3.46E-06 | 4.88E-05 |
| 207861_at    | CCL22                | 0.85<br>1 | 1.8  | 1.99E-04 | 1.26E-03 |
| 37145_at     | GNLY                 | 0.85      | 1.8  | 2.06E-06 | 3.22E-05 |
| 220356_at    | CORIN                | 0.85      | 1.8  | 7.17E-05 | 5.54E-04 |
| 234946_at    | ENTPD6               | 0.85      | 1.8  | 5.89E-05 | 4.71E-04 |
| 1555579_s_at | PTPRM                | 0.85      | 1.8  | 3.24E-08 | 1.19E-06 |
| 1554824_at   | ZNF585A              | 0.84<br>9 | 1.8  | 1.12E-05 | 1.25E-04 |
| 204870_s_at  | PCSK2                | 0.84<br>8 | 1.8  | 1.60E-05 | 1.67E-04 |
| 1552410_at   | CLEC4F               | 0.84<br>8 | 1.8  | 6.47E-05 | 5.09E-04 |
| 230626_at    | TSPAN12              | 0.84<br>8 | 1.8  | 1.70E-03 | 6.89E-03 |
| 239130_at    | MIR101-1 /// MIR3671 | 0.84<br>8 | 1.8  | 1.02E-05 | 1.17E-04 |

|              |                               |           |      |          |          |
|--------------|-------------------------------|-----------|------|----------|----------|
| 203523_at    | LSP1                          | 0.84<br>8 | 1.8  | 1.89E-06 | 3.01E-05 |
| 227749_at    | POU2F2                        | 0.84<br>8 | 1.8  | 1.99E-08 | 7.93E-07 |
| 242957_at    | VWCE                          | 0.84<br>8 | 1.8  | 4.35E-06 | 5.87E-05 |
| 204199_at    | RALGPS1                       | 0.84<br>8 | 1.8  | 3.20E-09 | 1.80E-07 |
| 213213_at    | DIDO1                         | 0.84<br>8 | 1.8  | 4.92E-06 | 6.46E-05 |
| 236325_at    | KIAA1377                      | 0.84<br>7 | 1.8  | 1.92E-05 | 1.93E-04 |
| 1556228_a_at | VCPIP1                        | 0.84<br>6 | 1.8  | 3.25E-10 | 2.76E-08 |
| 213559_s_at  | ZNF467                        | 0.84<br>6 | 1.8  | 5.84E-05 | 4.67E-04 |
| 1558711_at   | FAM13A-AS1                    | 0.84<br>5 | 1.8  | 3.12E-09 | 1.77E-07 |
| 230457_at    | TMEM242                       | 0.84<br>4 | 1.8  | 3.58E-06 | 5.02E-05 |
| 239309_at    | DLX6                          | 0.84<br>4 | 1.79 | 2.06E-05 | 2.05E-04 |
| 205898_at    | CX3CR1                        | 0.84<br>3 | 1.79 | 9.43E-07 | 1.70E-05 |
| 205830_at    | CLGN                          | 0.84<br>3 | 1.79 | 2.71E-05 | 2.55E-04 |
| 205878_at    | POU6F1                        | 0.84<br>3 | 1.79 | 1.30E-07 | 3.59E-06 |
| 215870_s_at  | PLA2G5                        | 0.84<br>2 | 1.79 | 3.58E-03 | 1.26E-02 |
| 205259_at    | NR3C2                         | 0.84<br>1 | 1.79 | 3.36E-07 | 7.52E-06 |
| 230539_at    | FAM182A                       | 0.84<br>1 | 1.79 | 8.19E-04 | 3.84E-03 |
| 238454_at    | ZNF540                        | 0.84<br>1 | 1.79 | 8.93E-08 | 2.65E-06 |
| 231986_at    | RIMS1                         | 0.84<br>1 | 1.79 | 1.71E-06 | 2.76E-05 |
| 1561589_a_at | NBEAL1                        | 0.84<br>1 | 1.79 | 2.18E-05 | 2.15E-04 |
| 1552727_s_at | ADAMTS17                      | 0.84<br>1 | 1.79 | 9.17E-07 | 1.66E-05 |
| 227138_at    | CRTAP                         | 0.84<br>1 | 1.79 | 1.15E-10 | 1.15E-08 |
| 228607_at    | OAS2                          | 0.84<br>1 | 1.79 | 6.33E-07 | 1.23E-05 |
| 212750_at    | PPP1R16B                      | 0.84<br>1 | 1.79 | 1.36E-08 | 5.72E-07 |
| 230422_at    | FPR3                          | 0.84      | 1.79 | 6.54E-05 | 5.13E-04 |
| 223533_at    | LRRRC8C                       | 0.84      | 1.79 | 1.14E-04 | 8.08E-04 |
| 223694_at    | TRIM7                         | 0.84      | 1.79 | 1.58E-05 | 1.65E-04 |
| 239260_at    | CORIN                         | 0.84      | 1.79 | 1.62E-05 | 1.68E-04 |
| 236673_at    | TIFAB                         | 0.83<br>9 | 1.79 | 3.77E-07 | 8.24E-06 |
| 235891_at    | DNM3OS /// MIR214 /// MIR3120 | 0.83<br>9 | 1.79 | 6.46E-07 | 1.26E-05 |
| 239582_at    | PML                           | 0.83<br>8 | 1.79 | 1.34E-08 | 5.64E-07 |
| 223710_at    | CCL26                         | 0.83<br>8 | 1.79 | 4.37E-04 | 2.34E-03 |
| 223522_at    | MIR600 /// MIR600HG           | 0.83<br>8 | 1.79 | 5.19E-05 | 4.28E-04 |
| 227178_at    | CELF2                         | 0.83<br>7 | 1.79 | 2.07E-07 | 5.19E-06 |

|              |                       |           |      |          |          |
|--------------|-----------------------|-----------|------|----------|----------|
| 206120_at    | CD33                  | 0.83<br>7 | 1.79 | 5.51E-07 | 1.10E-05 |
| 202032_s_at  | MAN2A2                | 0.83<br>6 | 1.79 | 4.65E-11 | 5.33E-09 |
| 231980_at    | DOK6                  | 0.83<br>6 | 1.79 | 2.55E-04 | 1.53E-03 |
| 203559_s_at  | ABP1                  | 0.83<br>6 | 1.78 | 7.34E-07 | 1.40E-05 |
| 40420_at     | STK10                 | 0.83<br>6 | 1.78 | 3.80E-10 | 3.14E-08 |
| 241765_at    | CPM                   | 0.83<br>5 | 1.78 | 1.61E-06 | 2.63E-05 |
| 1560698_a_at | TRHDE-AS1             | 0.83<br>5 | 1.78 | 3.42E-04 | 1.93E-03 |
| 207381_at    | ALOX12B               | 0.83<br>5 | 1.78 | 5.37E-03 | 1.75E-02 |
| 1560910_at   | PPIL6                 | 0.83<br>5 | 1.78 | 7.07E-05 | 5.46E-04 |
| 210185_at    | CACNB1                | 0.83<br>5 | 1.78 | 3.43E-06 | 4.85E-05 |
| 213942_at    | MEGF6                 | 0.83<br>5 | 1.78 | 2.51E-07 | 6.02E-06 |
| 1556665_at   | LOC101059957 /// TTC6 | 0.83<br>4 | 1.78 | 2.53E-05 | 2.42E-04 |
| 212827_at    | IGHM                  | 0.83<br>4 | 1.78 | 1.23E-03 | 5.33E-03 |
| 239683_at    | CLYBL                 | 0.83<br>4 | 1.78 | 3.02E-07 | 6.98E-06 |
| 236234_at    | PDE1A                 | 0.83<br>4 | 1.78 | 1.03E-05 | 1.17E-04 |
| 229105_at    | GPR39                 | 0.83<br>4 | 1.78 | 3.20E-04 | 1.83E-03 |
| 223211_at    | HACL1                 | 0.83<br>4 | 1.78 | 6.26E-06 | 7.80E-05 |
| 229800_at    | DCLK1                 | 0.83<br>4 | 1.78 | 7.15E-06 | 8.68E-05 |
| 204265_s_at  | GPSM3                 | 0.83<br>3 | 1.78 | 2.73E-08 | 1.04E-06 |
| 216481_at    | GRIP2                 | 0.83<br>3 | 1.78 | 6.27E-06 | 7.81E-05 |
| 205686_s_at  | CD86                  | 0.83<br>3 | 1.78 | 2.95E-08 | 1.11E-06 |
| 214147_at    | MROH7                 | 0.83<br>2 | 1.78 | 8.66E-05 | 6.46E-04 |
| 204502_at    | SAMHD1                | 0.83<br>2 | 1.78 | 2.02E-06 | 3.16E-05 |
| 1553220_at   | FAM117B               | 0.83<br>2 | 1.78 | 1.10E-05 | 1.23E-04 |
| 229348_at    | UBIAD1                | 0.83<br>2 | 1.78 | 1.15E-03 | 5.04E-03 |
| 208131_s_at  | PTGIS                 | 0.83<br>1 | 1.78 | 1.83E-04 | 1.18E-03 |
| 239237_at    | LOC100506776          | 0.83<br>1 | 1.78 | 3.74E-04 | 2.07E-03 |
| 37966_at     | PARVB                 | 0.83<br>1 | 1.78 | 1.22E-05 | 1.34E-04 |
| 235414_at    | ZNF383                | 0.83<br>1 | 1.78 | 3.70E-07 | 8.11E-06 |
| 205473_at    | ATP6V1B1              | 0.83      | 1.78 | 3.44E-04 | 1.94E-03 |
| 224162_s_at  | FBXO31                | 0.83      | 1.78 | 1.22E-08 | 5.27E-07 |
| 214059_at    | IFI44                 | 0.83      | 1.78 | 1.97E-04 | 1.25E-03 |
| 219909_at    | MMP28                 | 0.83      | 1.78 | 7.34E-05 | 5.64E-04 |
| 223800_s_at  | LIMS3 /// LIMS3L      | 0.83      | 1.78 | 7.84E-06 | 9.37E-05 |
| 228083_at    | CACNA2D4              | 0.82      | 1.78 | 7.63E-06 | 9.17E-05 |

|             |                          | 9    |      |          |                   |
|-------------|--------------------------|------|------|----------|-------------------|
| 231406_at   | ORAI2                    | 0.82 | 8    | 1.78     | 1.46E-06 2.44E-05 |
| 1554003_at  | ARHGEF28                 | 0.82 | 8    | 1.78     | 3.55E-06 4.98E-05 |
| 214963_at   | NUP160                   | 0.82 | 8    | 1.77     | 5.41E-05 4.41E-04 |
| 204674_at   | LRMP                     | 0.82 | 8    | 1.77     | 3.43E-06 4.86E-05 |
| 203081_at   | CTNNBIP1                 | 0.82 | 8    | 1.77     | 1.19E-08 5.19E-07 |
| 210321_at   | GZMH                     | 0.82 | 6    | 1.77     | 6.10E-05 4.85E-04 |
| 206049_at   | SELP                     | 0.82 | 6    | 1.77     | 2.12E-04 1.32E-03 |
| 237783_at   | PLAC8L1                  | 0.82 | 6    | 1.77     | 2.77E-04 1.63E-03 |
| 221524_s_at | RRAGD                    | 0.82 | 6    | 1.77     | 1.46E-07 3.94E-06 |
| 230238_at   | SOWAHA                   | 0.82 | 5    | 1.77     | 5.14E-05 4.24E-04 |
| 212588_at   | PTPRC                    | 0.82 | 5    | 1.77     | 1.09E-05 1.22E-04 |
| 238025_at   | MLKL                     | 0.82 | 4    | 1.77     | 4.40E-07 9.22E-06 |
| 244444_at   | PKD1L2                   | 0.82 | 4    | 1.77     | 4.95E-05 4.12E-04 |
| 223922_x_at | MS4A6A                   | 0.82 | 3    | 1.77     | 6.37E-06 7.90E-05 |
| 203296_s_at | ATP1A2                   | 0.82 | 3    | 1.77     | 6.25E-03 1.97E-02 |
| 220041_at   | PIGZ                     | 0.82 | 3    | 1.77     | 8.42E-06 9.93E-05 |
| 223767_at   | GPR84                    | 0.82 | 3    | 1.77     | 1.65E-07 4.33E-06 |
| 210571_s_at | CMAHP                    | 0.82 | 3    | 1.77     | 1.20E-05 1.32E-04 |
| 222088_s_at | SLC2A14 /// SLC2A3       | 0.82 | 2    | 1.77     | 2.62E-04 1.56E-03 |
| 219127_at   | PRR15L                   | 0.82 | 2    | 1.77     | 2.94E-04 1.72E-03 |
| 1552633_at  | ZNF101                   | 0.82 | 2    | 1.77     | 8.32E-07 1.54E-05 |
| 227794_at   | GLYATL1 /// LOC100287413 | 0.82 | 1    | 1.77     | 1.38E-03 5.86E-03 |
| 240048_at   | STRC                     | 0.82 | 1    | 1.77     | 1.21E-06 2.10E-05 |
| 239135_at   | CPPED1                   | 0.82 | 1.77 | 8.92E-08 | 2.65E-06          |
| 220016_at   | AHNAK                    | 0.82 | 1.77 | 9.17E-09 | 4.23E-07          |
| 237753_at   | IL21R                    | 0.82 | 1.77 | 2.26E-04 | 1.39E-03          |
| 220326_s_at | ARHGEF40                 | 0.82 | 1.76 | 3.29E-07 | 7.42E-06          |
| 232570_s_at | ADAM33                   | 0.81 | 9    | 1.76     | 1.26E-04 8.79E-04 |
| 217442_at   | LOC100131825             | 0.81 | 8    | 1.76     | 8.78E-05 6.53E-04 |
| 228647_at   | LOC100049716             | 0.81 | 8    | 1.76     | 6.97E-08 2.21E-06 |
| 204198_s_at | RUNX3                    | 0.81 | 8    | 1.76     | 3.21E-07 7.29E-06 |
| 224735_at   | CYB561A3                 | 0.81 | 8    | 1.76     | 1.04E-10 1.06E-08 |
| 230425_at   | EPHB1                    | 0.81 | 8    | 1.76     | 4.96E-05 4.12E-04 |
| 239675_at   | LINC00900                | 0.81 | 1.76 | 1.56E-04 | 1.04E-03          |

|              |                                 |      |      |          |          |
|--------------|---------------------------------|------|------|----------|----------|
|              |                                 | 7    |      |          |          |
|              |                                 | 0.81 |      |          |          |
| 217690_at    | ENOSF1                          | 7    | 1.76 | 2.64E-07 | 6.26E-06 |
|              |                                 | 0.81 |      |          |          |
| 207901_at    | IL12B                           | 7    | 1.76 | 3.85E-04 | 2.12E-03 |
|              |                                 | 0.81 |      |          |          |
| 230780_at    | LINC00886                       | 7    | 1.76 | 4.66E-05 | 3.92E-04 |
|              |                                 | 0.81 |      |          |          |
| 203911_at    | RAP1GAP                         | 7    | 1.76 | 1.63E-06 | 2.65E-05 |
|              |                                 | 0.81 |      |          |          |
| 213837_at    | L3MBTL1                         | 7    | 1.76 | 1.08E-08 | 4.78E-07 |
|              |                                 | 0.81 |      |          |          |
| 235593_at    | ZEB2                            | 6    | 1.76 | 1.21E-04 | 8.48E-04 |
|              |                                 | 0.81 |      |          |          |
| 224027_at    | CCL28                           | 6    | 1.76 | 3.05E-08 | 1.13E-06 |
|              |                                 | 0.81 |      |          |          |
| 222362_at    | AGFG2                           | 5    | 1.76 | 1.25E-06 | 2.14E-05 |
|              |                                 | 0.81 |      |          |          |
| 210794_s_at  | MEG3                            | 5    | 1.76 | 2.14E-06 | 3.32E-05 |
|              |                                 | 0.81 |      |          |          |
| 228702_at    | FLJ43663                        | 5    | 1.76 | 1.37E-05 | 1.46E-04 |
|              |                                 | 0.81 |      |          |          |
| 210895_s_at  | CD86                            | 5    | 1.76 | 8.20E-08 | 2.50E-06 |
|              |                                 | 0.81 |      |          |          |
| 235173_at    | MBNL1-AS1                       | 4    | 1.76 | 4.60E-04 | 2.44E-03 |
|              |                                 | 0.81 |      |          |          |
| 201422_at    | IFI30 /// PIK3R2                | 4    | 1.76 | 1.27E-08 | 5.43E-07 |
|              |                                 | 0.81 |      |          |          |
| 232311_at    | B2M                             | 4    | 1.76 | 9.26E-07 | 1.68E-05 |
|              |                                 | 0.81 |      |          |          |
| 209933_s_at  | CD300A                          | 4    | 1.76 | 1.24E-06 | 2.14E-05 |
|              |                                 | 0.81 |      |          |          |
| 209374_s_at  | IGHM                            | 3    | 1.76 | 9.87E-04 | 4.48E-03 |
|              |                                 | 0.81 |      |          |          |
| 204821_at    | BTN3A3                          | 3    | 1.76 | 4.75E-09 | 2.49E-07 |
|              |                                 | 0.81 |      |          |          |
| 202075_s_at  | PLTP                            | 3    | 1.76 | 5.39E-10 | 4.18E-08 |
|              |                                 | 0.81 |      |          |          |
| 236538_at    | GRIA2                           | 3    | 1.76 | 6.07E-03 | 1.93E-02 |
|              |                                 | 0.81 |      |          |          |
| 214046_at    | FUT9                            | 3    | 1.76 | 2.28E-04 | 1.40E-03 |
|              |                                 | 0.81 |      |          |          |
| 244070_at    | SYNE1                           | 2    | 1.76 | 1.74E-06 | 2.81E-05 |
|              |                                 | 0.81 |      |          |          |
| 209546_s_at  | APOL1                           | 2    | 1.76 | 1.42E-06 | 2.40E-05 |
|              |                                 | 0.81 |      |          |          |
| 224225_s_at  | ETV7                            | 2    | 1.76 | 6.57E-05 | 5.14E-04 |
|              |                                 | 0.81 |      |          |          |
| 228177_at    | CREBBP                          | 2    | 1.76 | 4.77E-07 | 9.83E-06 |
|              |                                 | 0.81 |      |          |          |
| 218126_at    | RMDN3                           | 2    | 1.76 | 7.90E-08 | 2.42E-06 |
|              |                                 | 0.81 |      |          |          |
| 234312_s_at  | ACSS2                           | 1    | 1.75 | 6.11E-05 | 4.86E-04 |
|              |                                 | 0.81 |      |          |          |
| 226558_at    | LOC389834 /// MAFIP /// TEKT4P2 | 1    | 1.75 | 3.95E-03 | 1.36E-02 |
|              |                                 | 0.81 |      |          |          |
| 220351_at    | CCRL1                           | 1    | 1.75 | 4.89E-04 | 2.56E-03 |
|              |                                 | 0.81 |      |          |          |
| 206741_at    | SSUH2                           | 1    | 1.75 | 3.77E-04 | 2.08E-03 |
|              |                                 | 0.81 |      |          |          |
| 1554179_s_at | LYNX1                           | 1    | 1.75 | 3.49E-03 | 1.23E-02 |
|              |                                 | 0.81 |      |          |          |
| 228802_at    | RBPM5                           | 1    | 1.75 | 6.51E-04 | 3.21E-03 |
|              |                                 | 0.80 |      |          |          |
| 1557283_a_at | ZNF519                          | 8    | 1.75 | 1.07E-05 | 1.21E-04 |
|              |                                 | 0.80 |      |          |          |
| 213611_at    | AQP5                            | 8    | 1.75 | 1.97E-02 | 4.95E-02 |
|              |                                 | 0.80 |      |          |          |
| 226610_at    | CENPV                           | 8    | 1.75 | 1.55E-06 | 2.55E-05 |

|              |          |      |      |          |          |  |
|--------------|----------|------|------|----------|----------|--|
|              |          | 7    |      |          |          |  |
|              |          | 0.80 |      |          |          |  |
| 220622_at    | LRRC31   | 7    | 1.75 | 2.79E-06 | 4.11E-05 |  |
|              |          | 0.80 |      |          |          |  |
| 205749_at    | CYP1A1   | 6    | 1.75 | 3.21E-03 | 1.15E-02 |  |
|              |          | 0.80 |      |          |          |  |
| 214735_at    | IPCEF1   | 6    | 1.75 | 3.39E-07 | 7.57E-06 |  |
|              |          | 0.80 |      |          |          |  |
| 206576_s_at  | CEACAM1  | 5    | 1.75 | 1.01E-04 | 7.29E-04 |  |
|              |          | 0.80 |      |          |          |  |
| 1554878_a_at | ABCD3    | 5    | 1.75 | 1.25E-04 | 8.70E-04 |  |
|              |          | 0.80 |      |          |          |  |
| 229523_at    | TMEM200C | 5    | 1.75 | 3.52E-06 | 4.95E-05 |  |
|              |          | 0.80 |      |          |          |  |
| 50965_at     | RAB26    | 5    | 1.75 | 8.68E-06 | 1.02E-04 |  |
|              |          | 0.80 |      |          |          |  |
| 205081_at    | CRIP1    | 4    | 1.75 | 1.81E-06 | 2.89E-05 |  |
|              |          | 0.80 |      |          |          |  |
| 236309_x_at  | ZMIZ2    | 4    | 1.75 | 1.25E-08 | 5.37E-07 |  |
|              |          | 0.80 |      |          |          |  |
| 239425_at    | DCUN1D5  | 4    | 1.75 | 2.39E-07 | 5.82E-06 |  |
|              |          | 0.80 |      |          |          |  |
| 35974_at     | LRMP     | 4    | 1.75 | 1.06E-05 | 1.19E-04 |  |
|              |          | 0.80 |      |          |          |  |
| 242316_at    | TMOD3    | 3    | 1.75 | 1.93E-03 | 7.64E-03 |  |
|              |          | 0.80 |      |          |          |  |
| 207443_at    | NR2E1    | 3    | 1.74 | 6.50E-05 | 5.10E-04 |  |
|              |          | 0.80 |      |          |          |  |
| 235639_at    | CDH19    | 3    | 1.74 | 1.53E-05 | 1.60E-04 |  |
|              |          | 0.80 |      |          |          |  |
| 228290_at    | PLK1S1   | 3    | 1.74 | 2.73E-06 | 4.05E-05 |  |
|              |          | 0.80 |      |          |          |  |
| 207466_at    | GAL      | 3    | 1.74 | 1.47E-02 | 3.92E-02 |  |
|              |          | 0.80 |      |          |          |  |
| 214180_at    | MAN1C1   | 2    | 1.74 | 1.70E-07 | 4.43E-06 |  |
|              |          | 0.80 |      |          |          |  |
| 205522_at    | HOXD4    | 2    | 1.74 | 1.79E-05 | 1.83E-04 |  |
|              |          | 0.80 |      |          |          |  |
| 227606_s_at  | STAMBPL1 | 1    | 1.74 | 9.37E-08 | 2.75E-06 |  |
|              |          | 0.80 |      |          |          |  |
| 226486_at    | MTERFD2  | 1    | 1.74 | 6.20E-06 | 7.74E-05 |  |
|              |          | 0.80 |      |          |          |  |
| 203000_at    | STMN2    | 1    | 1.74 | 2.48E-04 | 1.50E-03 |  |
|              |          | 0.80 |      |          |          |  |
| 207583_at    | ABCD2    | 1    | 1.74 | 4.67E-04 | 2.47E-03 |  |
|              |          | 0.8  |      |          |          |  |
| 220460_at    | SLCO1C1  | 0.8  | 1.74 | 1.77E-05 | 1.81E-04 |  |
|              |          | 0.8  |      |          |          |  |
| 1559839_at   | TBX18    | 0.8  | 1.74 | 6.28E-04 | 3.12E-03 |  |
|              |          | 0.8  |      |          |          |  |
| 205880_at    | PRKD1    | 0.8  | 1.74 | 5.59E-08 | 1.85E-06 |  |
|              |          | 0.79 |      |          |          |  |
| 226679_at    | SLC26A11 | 9    | 1.74 | 5.24E-07 | 1.06E-05 |  |
|              |          | 0.79 |      |          |          |  |
| 213325_at    | PVRL3    | 9    | 1.74 | 6.19E-06 | 7.73E-05 |  |
|              |          | 0.79 |      |          |          |  |
| 219525_at    | SLC47A1  | 9    | 1.74 | 7.10E-05 | 5.48E-04 |  |
|              |          | 0.79 |      |          |          |  |
| 215536_at    | HLA-DQB2 | 9    | 1.74 | 3.53E-04 | 1.97E-03 |  |
|              |          | 0.79 |      |          |          |  |
| 236465_at    | RNF175   | 9    | 1.74 | 2.39E-05 | 2.31E-04 |  |
|              |          | 0.79 |      |          |          |  |
| 236514_at    | ACOT8    | 9    | 1.74 | 7.39E-07 | 1.41E-05 |  |
|              |          | 0.79 |      |          |          |  |
| 213036_x_at  | ATP2A3   | 9    | 1.74 | 6.58E-04 | 3.24E-03 |  |
|              |          | 0.79 |      |          |          |  |
| 214494_s_at  | SPG7     | 8    | 1.74 | 5.08E-08 | 1.70E-06 |  |

|              |                     |           |      |          |          |
|--------------|---------------------|-----------|------|----------|----------|
| 206625_at    | PRPH2               | 0.79<br>8 | 1.74 | 1.71E-03 | 6.92E-03 |
| 203438_at    | STC2                | 0.79<br>8 | 1.74 | 1.65E-03 | 6.72E-03 |
| 230773_at    | ZNF385D             | 0.79<br>7 | 1.74 | 8.50E-05 | 6.37E-04 |
| 239186_at    | MGC39372            | 0.79<br>7 | 1.74 | 2.46E-03 | 9.26E-03 |
| 233647_s_at  | CDADC1              | 0.79<br>6 | 1.74 | 9.04E-08 | 2.68E-06 |
| 219889_at    | FRAT1               | 0.79<br>6 | 1.74 | 2.57E-07 | 6.15E-06 |
| 230443_at    | NHP2L1              | 0.79<br>6 | 1.74 | 1.14E-05 | 1.27E-04 |
| 217521_at    | HAL                 | 0.79<br>5 | 1.74 | 2.66E-03 | 9.91E-03 |
| 226595_at    | SNX21               | 0.79<br>5 | 1.74 | 2.49E-05 | 2.39E-04 |
| 201137_s_at  | HLA-DPB1            | 0.79<br>5 | 1.74 | 1.62E-06 | 2.64E-05 |
| 1559584_a_at | C16orf54            | 0.79<br>5 | 1.73 | 1.04E-03 | 4.69E-03 |
| 216149_at    | LRRC37BP1           | 0.79<br>5 | 1.73 | 1.56E-03 | 6.44E-03 |
| 209479_at    | CCDC28A             | 0.79<br>5 | 1.73 | 1.50E-11 | 2.08E-09 |
| 1559144_x_at | LINC00910           | 0.79<br>5 | 1.73 | 5.08E-07 | 1.03E-05 |
| 207757_at    | ZFP2                | 0.79<br>4 | 1.73 | 4.29E-05 | 3.67E-04 |
| 230184_at    | LOC100506421        | 0.79<br>4 | 1.73 | 5.30E-07 | 1.06E-05 |
| 210179_at    | KCNJ13              | 0.79<br>4 | 1.73 | 2.29E-04 | 1.41E-03 |
| 232794_at    | LOC153682           | 0.79<br>4 | 1.73 | 5.36E-06 | 6.92E-05 |
| 206502_s_at  | INSM1               | 0.79<br>4 | 1.73 | 1.32E-04 | 9.11E-04 |
| 230031_at    | HSPA5               | 0.79<br>3 | 1.73 | 3.65E-08 | 1.30E-06 |
| 203561_at    | FCGR2A              | 0.79<br>3 | 1.73 | 7.62E-06 | 9.17E-05 |
| 228641_at    | CARD8               | 0.79<br>3 | 1.73 | 4.41E-09 | 2.34E-07 |
| 237974_at    | ABHD12B /// MIR4454 | 0.79<br>3 | 1.73 | 1.23E-06 | 2.13E-05 |
| 214890_s_at  | FAM149A             | 0.79<br>3 | 1.73 | 3.81E-05 | 3.34E-04 |
| 228727_at    | ANXA11              | 0.79<br>2 | 1.73 | 1.06E-05 | 1.20E-04 |
| 222778_s_at  | WHSC1               | 0.79<br>2 | 1.73 | 3.73E-06 | 5.18E-05 |
| 230751_at    | WNT4                | 0.79<br>1 | 1.73 | 1.93E-04 | 1.23E-03 |
| 222905_s_at  | TMEM143             | 0.79<br>1 | 1.73 | 3.26E-07 | 7.35E-06 |
| 244779_at    | ZDHHC2              | 0.79<br>1 | 1.73 | 8.46E-06 | 9.96E-05 |
| 222764_at    | ASRGL1              | 0.79<br>1 | 1.73 | 1.72E-07 | 4.46E-06 |
| 208268_at    | ADAM28              | 0.79<br>1 | 1.73 | 1.35E-06 | 2.29E-05 |
| 206572_x_at  | ZNF85               | 0.79<br>1 | 1.73 | 8.39E-05 | 6.30E-04 |
| 210517_s_at  | AKAP12              | 0.79<br>1 | 1.73 | 9.64E-05 | 7.03E-04 |

|              |                                    |      |      |          |          |
|--------------|------------------------------------|------|------|----------|----------|
| 1552726_at   | ADAMTS17                           | 0.79 | 1.73 | 1.61E-04 | 1.06E-03 |
| 239345_at    | SLC19A3                            | 0.79 | 1.73 | 9.89E-04 | 4.48E-03 |
| 204908_s_at  | BCL3                               | 0.79 | 1.73 | 6.48E-05 | 5.09E-04 |
| 220435_at    | SLC30A10                           | 0.79 | 1.73 | 7.15E-03 | 2.20E-02 |
| 209948_at    | KCNMB1                             | 0.79 | 1.73 | 1.68E-04 | 1.10E-03 |
| 216191_s_at  | TRDV3                              | 0.79 | 1.73 | 7.83E-03 | 2.37E-02 |
| 244627_at    | DAK                                | 0.79 | 1.73 | 3.82E-09 | 2.09E-07 |
| 216331_at    | ITGA7                              | 0.78 | 9    | 1.73     | 2.04E-05 |
| 223999_at    | PPIL2                              | 0.78 | 9    | 1.73     | 2.70E-05 |
| 219799_s_at  | DHRS9                              | 0.78 | 8    | 1.73     | 5.66E-04 |
| 212735_at    | KIAA0226                           | 0.78 | 8    | 1.73     | 4.70E-06 |
| 241782_at    | NEBL                               | 0.78 | 8    | 1.73     | 3.73E-06 |
| 221142_s_at  | PECR                               | 0.78 | 7    | 1.72     | 8.71E-03 |
| 222218_s_at  | PILRA                              | 0.78 | 6    | 1.72     | 6.14E-06 |
| 242388_x_at  | TAGAP                              | 0.78 | 6    | 1.72     | 2.29E-05 |
| 220061_at    | ACSM5                              | 0.78 | 6    | 1.72     | 2.40E-05 |
| 238905_at    | RHOJ                               | 0.78 | 6    | 1.72     | 1.62E-06 |
| 1557557_at   | MATN1-AS1                          | 0.78 | 6    | 1.72     | 1.18E-07 |
| 239142_at    | RFESD                              | 0.78 | 6    | 1.72     | 2.66E-06 |
| 206283_s_at  | TAL1                               | 0.78 | 5    | 1.72     | 1.26E-04 |
| 238746_at    | PXMP4                              | 0.78 | 5    | 1.72     | 7.27E-07 |
| 206955_at    | AQP7 /// LOC100509620              | 0.78 | 5    | 1.72     | 1.47E-02 |
| 204118_at    | CD48                               | 0.78 | 5    | 1.72     | 3.36E-04 |
| 237748_at    | SCGB2B2                            | 0.78 | 5    | 1.72     | 3.85E-03 |
| 209016_s_at  | KRT7                               | 0.78 | 5    | 1.72     | 6.15E-03 |
| 229628_s_at  | CCDC180 /// LOC100499484-C9ORF174  | 0.78 | 4    | 1.72     | 2.79E-06 |
| 235913_at    | ZNF880                             | 0.78 | 4    | 1.72     | 6.44E-08 |
| 243681_at    | SHANK2                             | 0.78 | 4    | 1.72     | 7.88E-03 |
| 214651_s_at  | HOXA10-HOXA9 /// HOXA9 /// MIR196B | 0.78 | 3    | 1.72     | 5.59E-04 |
| 209721_s_at  | IFFO1                              | 0.78 | 3    | 1.72     | 5.44E-07 |
| 230197_s_at  | TPPP                               | 0.78 | 3    | 1.72     | 1.58E-04 |
| 240063_at    | GUSBP5                             | 0.78 | 3    | 1.72     | 5.21E-05 |
| 205765_at    | CYP3A5                             | 0.78 | 2    | 1.72     | 5.65E-05 |
| 1561666_a_at | PSMG3-AS1                          | 0.78 | 2    | 1.72     | 1.59E-05 |
| 204438_at    | MRC1                               | 0.78 | 2    | 1.72     | 4.16E-07 |



|              |              |           |      |          |          |
|--------------|--------------|-----------|------|----------|----------|
| 219801_at    | ZNF34        | 0.78<br>2 | 1.72 | 4.67E-07 | 9.68E-06 |
| 214377_s_at  | CTRL         | 0.78<br>2 | 1.72 | 4.33E-07 | 9.09E-06 |
| 209160_at    | AKR1C3       | 0.78<br>2 | 1.72 | 4.30E-07 | 9.07E-06 |
| 243403_x_at  | CPM          | 0.78<br>1 | 1.72 | 4.12E-08 | 1.42E-06 |
| 234165_at    | PTGDR        | 0.78<br>1 | 1.72 | 2.90E-04 | 1.70E-03 |
| 238364_x_at  | GLI4         | 0.78<br>1 | 1.72 | 1.33E-05 | 1.43E-04 |
| 224583_at    | COTL1        | 0.78<br>1 | 1.72 | 5.86E-05 | 4.69E-04 |
| 220327_at    | VGLL3        | 0.78<br>1 | 1.72 | 3.06E-05 | 2.80E-04 |
| 234841_x_at  | OBP2A        | 0.78<br>1 | 1.72 | 6.85E-06 | 8.38E-05 |
| 206239_s_at  | SPINK1       | 0.78<br>1 | 1.72 | 1.56E-05 | 1.63E-04 |
| 204151_x_at  | AKR1C1       | 0.78      | 1.72 | 2.75E-05 | 2.58E-04 |
| 210233_at    | IL1RAP       | 0.78      | 1.72 | 1.18E-04 | 8.33E-04 |
| 226047_at    | MRVI1        | 0.78      | 1.72 | 4.18E-04 | 2.26E-03 |
| 210385_s_at  | ERAP1        | 0.78      | 1.72 | 3.23E-04 | 1.84E-03 |
| 226972_s_at  | CCDC136      | 0.78      | 1.72 | 2.91E-05 | 2.69E-04 |
| 1554240_a_at | ITGAL        | 0.78      | 1.72 | 1.56E-05 | 1.63E-04 |
| 221805_at    | NEFL         | 0.77<br>9 | 1.72 | 2.51E-04 | 1.51E-03 |
| 230756_at    | ZNF683       | 0.77<br>9 | 1.72 | 7.14E-10 | 5.26E-08 |
| 212091_s_at  | COL6A1       | 0.77<br>9 | 1.72 | 1.29E-07 | 3.56E-06 |
| 225033_at    | ST3GAL1      | 0.77<br>8 | 1.72 | 7.71E-06 | 9.24E-05 |
| 233111_at    | PTCSC1       | 0.77<br>8 | 1.72 | 7.66E-07 | 1.44E-05 |
| 1553683_s_at | FBXL14       | 0.77<br>8 | 1.71 | 3.92E-07 | 8.46E-06 |
| 1556454_a_at | LOC100506274 | 0.77<br>8 | 1.71 | 2.28E-06 | 3.50E-05 |
| 210262_at    | CRISP2       | 0.77<br>7 | 1.71 | 3.32E-03 | 1.18E-02 |
| 205762_s_at  | DUS4L        | 0.77<br>7 | 1.71 | 8.65E-08 | 2.59E-06 |
| 211990_at    | HLA-DPA1     | 0.77<br>7 | 1.71 | 1.62E-03 | 6.64E-03 |
| 206393_at    | TNNI2        | 0.77<br>7 | 1.71 | 6.55E-06 | 8.07E-05 |
| 213820_s_at  | STARD5       | 0.77<br>6 | 1.71 | 9.24E-07 | 1.67E-05 |
| 222592_s_at  | ACSL5        | 0.77<br>6 | 1.71 | 4.34E-04 | 2.33E-03 |
| 216237_s_at  | MCM5         | 0.77<br>6 | 1.71 | 1.28E-05 | 1.39E-04 |
| 235292_at    | FLJ32255     | 0.77<br>5 | 1.71 | 1.33E-05 | 1.43E-04 |
| 1557062_at   | LOC100129195 | 0.77<br>5 | 1.71 | 3.03E-07 | 7.00E-06 |
| 230538_at    | SHC4         | 0.77<br>5 | 1.71 | 4.23E-05 | 3.64E-04 |
| 236738_at    | C3orf80      | 0.77<br>4 | 1.71 | 1.17E-02 | 3.25E-02 |
| 204272_at    | LGALS4       | 0.77<br>4 | 1.71 | 1.69E-03 | 6.87E-03 |

|              |                                                                                                                                                                          |              |      |          |          |
|--------------|--------------------------------------------------------------------------------------------------------------------------------------------------------------------------|--------------|------|----------|----------|
| 204846_at    | CP                                                                                                                                                                       | 0.77<br>4    | 1.71 | 1.80E-03 | 7.21E-03 |
| 205304_s_at  | KCNJ8                                                                                                                                                                    | 0.77<br>3    | 1.71 | 1.54E-05 | 1.62E-04 |
| 229741_at    | MAVS                                                                                                                                                                     | 0.77<br>3    | 1.71 | 7.40E-10 | 5.43E-08 |
| 227429_at    | EFCAB4A                                                                                                                                                                  | 0.77<br>3    | 1.71 | 5.84E-05 | 4.67E-04 |
| 44790_s_at   | KIAA0226L                                                                                                                                                                | 0.77<br>3    | 1.71 | 8.77E-05 | 6.53E-04 |
| 244251_at    | LCP2                                                                                                                                                                     | 0.77<br>3    | 1.71 | 2.12E-05 | 2.10E-04 |
| 231175_at    | BEND6                                                                                                                                                                    | 0.77<br>3    | 1.71 | 8.94E-05 | 6.62E-04 |
| 1561985_at   | C14orf39                                                                                                                                                                 | 0.77<br>2    | 1.71 | 5.54E-03 | 1.79E-02 |
| 219019_at    | PIDD                                                                                                                                                                     | 0.77<br>2    | 1.71 | 6.88E-04 | 3.35E-03 |
| 239685_at    | LINC00900                                                                                                                                                                | 0.77<br>2    | 1.71 | 1.41E-05 | 1.49E-04 |
| 1557116_at   | APOL6                                                                                                                                                                    | 0.77<br>2    | 1.71 | 8.57E-06 | 1.01E-04 |
| 227610_at    | TSPAN11                                                                                                                                                                  | 0.77<br>2    | 1.71 | 5.68E-05 | 4.58E-04 |
| 234929_s_at  | SPATA7                                                                                                                                                                   | 0.77<br>2    | 1.71 | 1.57E-06 | 2.58E-05 |
| 221584_s_at  | KCNMA1                                                                                                                                                                   | 0.77<br>1    | 1.71 | 5.42E-05 | 4.42E-04 |
| 218885_s_at  | GALNT12                                                                                                                                                                  | 0.77<br>1    | 1.71 | 7.06E-06 | 8.60E-05 |
| 242720_at    | ITIH4                                                                                                                                                                    | 0.77<br>1    | 1.71 | 1.49E-03 | 6.22E-03 |
| 225353_s_at  | C1QC                                                                                                                                                                     | 0.77<br>1    | 1.71 | 8.91E-07 | 1.63E-05 |
| 230882_at    | DLX6-AS1                                                                                                                                                                 | 0.77<br>0.76 | 1.7  | 4.70E-04 | 2.48E-03 |
| 239694_at    | TRIM7                                                                                                                                                                    | 0.76<br>9    | 1.7  | 6.53E-05 | 5.12E-04 |
| 230250_at    | PTPRB                                                                                                                                                                    | 0.76<br>9    | 1.7  | 5.09E-05 | 4.21E-04 |
| 203320_at    | SH2B3                                                                                                                                                                    | 0.76<br>9    | 1.7  | 1.53E-06 | 2.54E-05 |
| 205904_at    | MICA                                                                                                                                                                     | 0.76<br>8    | 1.7  | 4.75E-06 | 6.29E-05 |
| 205585_at    | ETV6                                                                                                                                                                     | 0.76<br>8    | 1.7  | 7.72E-05 | 5.89E-04 |
| 229698_at    | SHANK3                                                                                                                                                                   | 0.76<br>8    | 1.7  | 8.06E-07 | 1.50E-05 |
| 210258_at    | RGS13                                                                                                                                                                    | 0.76<br>8    | 1.7  | 2.26E-03 | 8.68E-03 |
| 232253_at    | C5orf56                                                                                                                                                                  | 0.76<br>7    | 1.7  | 2.03E-07 | 5.12E-06 |
| 1564706_s_at | GLS2                                                                                                                                                                     | 0.76<br>7    | 1.7  | 2.66E-05 | 2.52E-04 |
| 220416_at    | ATP8B4                                                                                                                                                                   | 0.76<br>7    | 1.7  | 1.11E-05 | 1.24E-04 |
| 214453_s_at  | IFI44                                                                                                                                                                    | 0.76<br>7    | 1.7  | 2.81E-05 | 2.62E-04 |
| 210664_s_at  | TFPI                                                                                                                                                                     | 0.76<br>7    | 1.7  | 5.78E-05 | 4.64E-04 |
| 225764_at    | ETV6                                                                                                                                                                     | 0.76<br>6    | 1.7  | 4.41E-09 | 2.34E-07 |
| 229872_s_at  | LOC100132999 /// LOC100996473 /// LOC100996720 ///<br>LOC100996740 /// LOC101060404 /// LOC101060562 ///<br>LOC101060645 /// LOC101060698 /// LOC642441 ///<br>LOC730256 | 0.76<br>6    | 1.7  | 4.30E-07 | 9.07E-06 |
| 214156_at    | MYRIP                                                                                                                                                                    | 0.76<br>6    | 1.7  | 2.23E-04 | 1.38E-03 |

|              |              |           |      |          |          |
|--------------|--------------|-----------|------|----------|----------|
| 229687_s_at  | PRDM11       | 0.76<br>5 | 1.7  | 1.75E-04 | 1.14E-03 |
| 219033_at    | PARP8        | 0.76<br>5 | 1.7  | 2.24E-08 | 8.80E-07 |
| 214032_at    | ZAP70        | 0.76<br>5 | 1.7  | 1.17E-08 | 5.14E-07 |
| 212276_at    | LPIN1        | 0.76<br>5 | 1.7  | 3.57E-05 | 3.16E-04 |
| 206271_at    | TLR3         | 0.76<br>5 | 1.7  | 5.18E-07 | 1.05E-05 |
| 220331_at    | CYP46A1      | 0.76<br>4 | 1.7  | 5.05E-05 | 4.18E-04 |
| 228207_at    | LOC100499489 | 0.76<br>4 | 1.7  | 9.70E-09 | 4.41E-07 |
| 1553213_a_at | KRT78        | 0.76<br>4 | 1.7  | 3.72E-03 | 1.30E-02 |
| 211421_s_at  | RET          | 0.76<br>4 | 1.7  | 1.50E-03 | 6.25E-03 |
| 206337_at    | CCR7         | 0.76<br>3 | 1.7  | 2.52E-05 | 2.41E-04 |
| 239074_at    | GRAPL        | 0.76<br>3 | 1.7  | 4.20E-04 | 2.27E-03 |
| 222101_s_at  | DCHS1        | 0.76<br>3 | 1.7  | 1.72E-04 | 1.12E-03 |
| 226776_at    | ENY2         | 0.76<br>3 | 1.7  | 7.52E-07 | 1.42E-05 |
| 202803_s_at  | ITGB2        | 0.76<br>3 | 1.7  | 4.61E-05 | 3.88E-04 |
| 216513_at    | DCT          | 0.76<br>3 | 1.7  | 5.22E-03 | 1.71E-02 |
| 219429_at    | FA2H         | 0.76<br>3 | 1.7  | 1.29E-04 | 8.92E-04 |
| 227757_at    | CUL4A        | 0.76<br>3 | 1.7  | 1.34E-04 | 9.18E-04 |
| 1552400_a_at | C15orf27     | 0.76<br>2 | 1.7  | 7.47E-05 | 5.72E-04 |
| 243880_at    | GOSR2        | 0.76<br>2 | 1.7  | 3.32E-04 | 1.89E-03 |
| 225597_at    | SLC45A4      | 0.76<br>2 | 1.7  | 1.27E-07 | 3.52E-06 |
| 37986_at     | EPOR         | 0.76<br>1 | 1.7  | 2.41E-07 | 5.85E-06 |
| 206345_s_at  | PON1         | 0.76<br>1 | 1.69 | 1.43E-03 | 6.02E-03 |
| 239802_at    | SAP30L       | 0.76<br>1 | 1.69 | 4.13E-06 | 5.63E-05 |
| 227486_at    | NT5E         | 0.76<br>1 | 1.69 | 5.08E-04 | 2.63E-03 |
| 213849_s_at  | PPP2R2B      | 0.76      | 1.69 | 9.62E-06 | 1.11E-04 |
| 219778_at    | ZFPM2        | 0.76      | 1.69 | 5.06E-06 | 6.61E-05 |
| 226305_at    | LYNX1        | 0.76      | 1.69 | 1.92E-04 | 1.22E-03 |
| 207016_s_at  | ALDH1A2      | 0.76      | 1.69 | 1.68E-04 | 1.10E-03 |
| 230497_at    | CELF5        | 0.75<br>9 | 1.69 | 1.28E-05 | 1.39E-04 |
| 207610_s_at  | EMR2         | 0.75<br>9 | 1.69 | 5.32E-06 | 6.89E-05 |
| 208606_s_at  | WNT4         | 0.75<br>9 | 1.69 | 5.25E-04 | 2.70E-03 |
| 219261_at    | C7orf26      | 0.75<br>9 | 1.69 | 3.41E-07 | 7.59E-06 |
| 224932_at    | CHCHD10      | 0.75<br>9 | 1.69 | 6.10E-06 | 7.66E-05 |
| 205790_at    | SKAP1        | 0.75<br>9 | 1.69 | 1.15E-06 | 2.00E-05 |

|              |                        |              |      |          |          |
|--------------|------------------------|--------------|------|----------|----------|
| 1555363_s_at | LINC00663              | 0.75<br>9    | 1.69 | 2.32E-04 | 1.42E-03 |
| 207037_at    | TNFRSF11A              | 0.75<br>8    | 1.69 | 1.17E-05 | 1.30E-04 |
| 206157_at    | PTX3                   | 0.75<br>8    | 1.69 | 1.14E-04 | 8.06E-04 |
| 212360_at    | AMPD2                  | 0.75<br>8    | 1.69 | 2.13E-06 | 3.30E-05 |
| 230802_at    | ARHGAP24               | 0.75<br>7    | 1.69 | 4.09E-04 | 2.22E-03 |
| 242972_at    | HCG18                  | 0.75<br>7    | 1.69 | 1.37E-04 | 9.38E-04 |
| 208335_s_at  | DARC                   | 0.75<br>7    | 1.69 | 5.81E-08 | 1.91E-06 |
| 242207_at    | CENPP /// LOC100128361 | 0.75<br>6    | 1.69 | 5.36E-05 | 4.38E-04 |
| 216594_x_at  | AKR1C1                 | 0.75<br>6    | 1.69 | 5.05E-05 | 4.18E-04 |
| 230531_at    | KCNC3                  | 0.75<br>6    | 1.69 | 1.00E-06 | 1.79E-05 |
| 243099_at    | NFAM1                  | 0.75<br>6    | 1.69 | 5.12E-10 | 4.04E-08 |
| 242426_at    | NRG4                   | 0.75<br>5    | 1.69 | 4.97E-06 | 6.51E-05 |
| 1564705_at   | GLS2                   | 0.75<br>5    | 1.69 | 1.63E-04 | 1.08E-03 |
| 1556319_at   | LOC283270              | 0.75<br>4    | 1.69 | 2.46E-06 | 3.73E-05 |
| 244485_at    | HLA-DPB1               | 0.75<br>4    | 1.69 | 6.21E-03 | 1.96E-02 |
| 228677_s_at  | RASAL3                 | 0.75<br>4    | 1.69 | 7.95E-07 | 1.49E-05 |
| 235827_at    | LOC100506472 /// TAB1  | 0.75<br>3    | 1.69 | 5.57E-06 | 7.12E-05 |
| 219727_at    | DUOX2                  | 0.75<br>3    | 1.68 | 3.96E-05 | 3.45E-04 |
| 203508_at    | TNFRSF1B               | 0.75<br>2    | 1.68 | 8.71E-08 | 2.60E-06 |
| 218999_at    | TMEM140                | 0.75<br>2    | 1.68 | 3.07E-06 | 4.44E-05 |
| 214221_at    | ALMS1                  | 0.75<br>1    | 1.68 | 1.17E-06 | 2.04E-05 |
| 223974_at    | DLGAP1-AS2             | 0.75<br>1    | 1.68 | 2.95E-04 | 1.72E-03 |
| 227482_at    | ADCK1                  | 0.75         | 1.68 | 2.09E-04 | 1.31E-03 |
| 205127_at    | PTGS1                  | 0.75         | 1.68 | 1.88E-03 | 7.47E-03 |
| 1555880_at   | ERVFRD-1               | 0.75         | 1.68 | 1.54E-04 | 1.03E-03 |
| 227344_at    | IKZF1                  | 0.75         | 1.68 | 5.61E-06 | 7.16E-05 |
| 214981_at    | POSTN                  | 0.75         | 1.68 | 4.46E-06 | 5.98E-05 |
| 48580_at     | CXXC1                  | 0.75<br>0.74 | 1.68 | 5.28E-06 | 6.86E-05 |
| 1554704_at   | ATP8B3                 | 0.74<br>9    | 1.68 | 2.75E-05 | 2.58E-04 |
| 223836_at    | FGFBP2                 | 0.74<br>9    | 1.68 | 7.93E-03 | 2.39E-02 |
| 243547_at    | LINC00921 /// ZNF263   | 0.74<br>9    | 1.68 | 3.57E-06 | 5.01E-05 |
| 233083_at    | MTHFD2L                | 0.74<br>8    | 1.68 | 1.06E-05 | 1.19E-04 |
| 206850_at    | RASL10A                | 0.74<br>8    | 1.68 | 3.65E-04 | 2.03E-03 |
| 219195_at    | PPARGC1A               | 0.74<br>8    | 1.68 | 1.41E-03 | 5.95E-03 |
| 1559591_s_at | CHDH                   | 0.74<br>8    | 1.68 | 1.48E-06 | 2.46E-05 |

|              |                  |           |      |          |          |
|--------------|------------------|-----------|------|----------|----------|
| 224463_s_at  | C11orf70         | 0.74<br>8 | 1.68 | 2.36E-05 | 2.29E-04 |
| 1554036_at   | ZBTB24           | 0.74<br>7 | 1.68 | 3.21E-03 | 1.15E-02 |
| 210168_at    | C6               | 0.74<br>7 | 1.68 | 8.18E-03 | 2.45E-02 |
| 219593_at    | SLC15A3          | 0.74<br>7 | 1.68 | 1.56E-09 | 9.90E-08 |
| 205484_at    | SIT1             | 0.74<br>7 | 1.68 | 1.22E-05 | 1.34E-04 |
| 213411_at    | ADAM22           | 0.74<br>7 | 1.68 | 2.81E-05 | 2.62E-04 |
| 208056_s_at  | CBFA2T3          | 0.74<br>6 | 1.68 | 2.41E-04 | 1.47E-03 |
| 204671_s_at  | ANKRD6           | 0.74<br>6 | 1.68 | 3.71E-05 | 3.27E-04 |
| 217284_x_at  | SERHL2           | 0.74<br>6 | 1.68 | 1.63E-03 | 6.65E-03 |
| 1553970_s_at | CEL              | 0.74<br>6 | 1.68 | 1.56E-03 | 6.42E-03 |
| 1558199_at   | FN1              | 0.74<br>6 | 1.68 | 1.46E-03 | 6.11E-03 |
| 225224_at    | C20orf112        | 0.74<br>6 | 1.68 | 4.73E-07 | 9.76E-06 |
| 1553614_a_at | FLJ25694         | 0.74<br>5 | 1.68 | 9.14E-05 | 6.75E-04 |
| 226459_at    | PIK3AP1          | 0.74<br>5 | 1.68 | 8.15E-07 | 1.52E-05 |
| 212268_at    | SERPINB1         | 0.74<br>5 | 1.68 | 4.93E-05 | 4.10E-04 |
| 236728_at    | LNPEP            | 0.74<br>5 | 1.68 | 2.97E-03 | 1.08E-02 |
| 205298_s_at  | BTN2A2           | 0.74<br>5 | 1.68 | 7.41E-07 | 1.41E-05 |
| 202637_s_at  | ICAM1            | 0.74<br>5 | 1.68 | 2.84E-07 | 6.66E-06 |
| 232662_x_at  | FAM213A          | 0.74<br>4 | 1.68 | 1.27E-08 | 5.42E-07 |
| 228206_at    | HS3ST4           | 0.74<br>4 | 1.68 | 1.46E-05 | 1.54E-04 |
| 229964_at    | C9orf152         | 0.74<br>4 | 1.67 | 6.00E-04 | 3.01E-03 |
| 240288_at    | KCNRG /// TRIM13 | 0.74<br>4 | 1.67 | 2.84E-05 | 2.64E-04 |
| 204776_at    | THBS4            | 0.74<br>3 | 1.67 | 7.77E-03 | 2.35E-02 |
| 235489_at    | RHOJ             | 0.74<br>3 | 1.67 | 7.07E-08 | 2.23E-06 |
| 1552544_at   | SERPINA12        | 0.74<br>3 | 1.67 | 9.08E-03 | 2.65E-02 |
| 228617_at    | XAF1             | 0.74<br>3 | 1.67 | 9.33E-06 | 1.08E-04 |
| 222057_at    | NOL12            | 0.74<br>3 | 1.67 | 6.73E-04 | 3.29E-03 |
| 219684_at    | RTP4             | 0.74<br>3 | 1.67 | 1.58E-04 | 1.05E-03 |
| 235557_at    | GPAT2            | 0.74<br>3 | 1.67 | 4.45E-03 | 1.50E-02 |
| 212793_at    | DAAM2            | 0.74<br>3 | 1.67 | 3.71E-07 | 8.13E-06 |
| 224505_s_at  | PLCD4            | 0.74<br>2 | 1.67 | 3.01E-04 | 1.75E-03 |
| 242372_s_at  | MFSD4            | 0.74<br>2 | 1.67 | 1.16E-04 | 8.19E-04 |
| 238846_at    | TNFRSF11A        | 0.74<br>2 | 1.67 | 2.14E-05 | 2.11E-04 |

|              |           |           |      |          |          |
|--------------|-----------|-----------|------|----------|----------|
| 205338_s_at  | DCT       | 0.74<br>1 | 1.67 | 4.48E-03 | 1.51E-02 |
| 227342_s_at  | MYEOV     | 0.74<br>1 | 1.67 | 8.73E-06 | 1.02E-04 |
| 201787_at    | FBLN1     | 0.74<br>1 | 1.67 | 5.98E-06 | 7.55E-05 |
| 1557359_at   | LOC285758 | 0.74<br>1 | 1.67 | 4.59E-04 | 2.44E-03 |
| 226030_at    | ACADSB    | 0.74<br>1 | 1.67 | 3.93E-08 | 1.37E-06 |
| 224110_at    | PRO1804   | 0.74      | 1.67 | 3.54E-05 | 3.14E-04 |
| 235688_s_at  | TRAF4     | 0.74      | 1.67 | 8.23E-05 | 6.21E-04 |
| 228593_at    | MTMR9LP   | 0.74      | 1.67 | 1.97E-05 | 1.97E-04 |
| 227582_at    | KLHDC9    | 0.74      | 1.67 | 1.23E-04 | 8.60E-04 |
| 227702_at    | CYP4X1    | 0.74      | 1.67 | 3.85E-06 | 5.32E-05 |
| 204530_s_at  | TOX       | 0.74      | 1.67 | 1.72E-06 | 2.78E-05 |
| 217684_at    | TYMS      | 0.74      | 1.67 | 2.39E-05 | 2.31E-04 |
| 235634_at    | PURG      | 0.73<br>9 | 1.67 | 1.09E-03 | 4.86E-03 |
| 206170_at    | ADRB2     | 0.73<br>9 | 1.67 | 7.10E-09 | 3.45E-07 |
| 213645_at    | ENOSF1    | 0.73<br>9 | 1.67 | 2.34E-08 | 9.12E-07 |
| 209592_s_at  | DCAF7     | 0.73<br>9 | 1.67 | 2.16E-08 | 8.55E-07 |
| 211883_x_at  | CEACAM1   | 0.73<br>9 | 1.67 | 2.81E-07 | 6.59E-06 |
| 239477_at    | EFHB      | 0.73<br>9 | 1.67 | 1.46E-02 | 3.89E-02 |
| 1553099_at   | TIGD1     | 0.73<br>8 | 1.67 | 1.17E-04 | 8.27E-04 |
| 207082_at    | CSF1      | 0.73<br>8 | 1.67 | 5.61E-08 | 1.85E-06 |
| 216611_s_at  | SLC6A2    | 0.73<br>8 | 1.67 | 2.96E-05 | 2.73E-04 |
| 218957_s_at  | PAAF1     | 0.73<br>8 | 1.67 | 7.04E-07 | 1.35E-05 |
| 224374_s_at  | EMILIN2   | 0.73<br>7 | 1.67 | 2.55E-04 | 1.53E-03 |
| 1560556_a_at | PLEKHA8   | 0.73<br>7 | 1.67 | 5.06E-05 | 4.19E-04 |
| 206421_s_at  | SERPINB7  | 0.73<br>7 | 1.67 | 7.86E-03 | 2.37E-02 |
| 226906_s_at  | ARHGAP9   | 0.73<br>7 | 1.67 | 3.15E-06 | 4.53E-05 |
| 202192_s_at  | GAS7      | 0.73<br>7 | 1.67 | 1.19E-10 | 1.17E-08 |
| 207317_s_at  | CASQ2     | 0.73<br>6 | 1.67 | 9.75E-03 | 2.81E-02 |
| 219983_at    | HRASLS    | 0.73<br>6 | 1.67 | 4.46E-03 | 1.50E-02 |
| 211034_s_at  | HECTD4    | 0.73<br>6 | 1.67 | 8.63E-08 | 2.59E-06 |
| 210451_at    | PKLR      | 0.73<br>6 | 1.67 | 3.20E-03 | 1.15E-02 |
| 209522_s_at  | CRAT      | 0.73<br>6 | 1.67 | 2.46E-03 | 9.28E-03 |
| 220961_s_at  | TBRG4     | 0.73<br>6 | 1.67 | 1.80E-04 | 1.16E-03 |
| 221801_x_at  | NEFL      | 0.73<br>6 | 1.67 | 4.66E-05 | 3.93E-04 |
| 214774_x_at  | TOX3      | 0.73<br>6 | 1.67 | 3.14E-03 | 1.13E-02 |

|              |                                                                     |           |      |          |          |
|--------------|---------------------------------------------------------------------|-----------|------|----------|----------|
| 229484_at    | PPM1J                                                               | 0.73<br>5 | 1.66 | 5.47E-05 | 4.45E-04 |
| 232024_at    | GIMAP2                                                              | 0.73<br>5 | 1.66 | 1.29E-07 | 3.57E-06 |
| 207328_at    | ALOX15                                                              | 0.73<br>4 | 1.66 | 5.74E-04 | 2.90E-03 |
| 220064_at    | LOC100506124 /// TTC21B                                             | 0.73<br>4 | 1.66 | 2.05E-05 | 2.03E-04 |
| 228667_at    | AGPAT4                                                              | 0.73<br>4 | 1.66 | 3.28E-04 | 1.87E-03 |
| 227908_at    | TBC1D24                                                             | 0.73<br>4 | 1.66 | 5.27E-07 | 1.06E-05 |
| 202465_at    | PCOLCE                                                              | 0.73<br>3 | 1.66 | 1.83E-07 | 4.68E-06 |
| 235174_s_at  | LOC100128822                                                        | 0.73<br>3 | 1.66 | 1.60E-04 | 1.06E-03 |
| 244468_at    | PDZK1P1                                                             | 0.73<br>3 | 1.66 | 4.48E-05 | 3.80E-04 |
| 214574_x_at  | LST1                                                                | 0.73<br>2 | 1.66 | 1.81E-06 | 2.90E-05 |
| 217626_at    | AKR1C1                                                              | 0.73<br>2 | 1.66 | 1.61E-03 | 6.59E-03 |
| 1553212_at   | KRT78                                                               | 0.73<br>2 | 1.66 | 1.26E-02 | 3.45E-02 |
| 204789_at    | FMNL1                                                               | 0.73<br>2 | 1.66 | 2.57E-08 | 9.84E-07 |
| 214409_at    | RFPL3S                                                              | 0.73<br>2 | 1.66 | 1.18E-05 | 1.31E-04 |
| 1552497_a_at | SLAMF6                                                              | 0.73<br>2 | 1.66 | 2.53E-04 | 1.52E-03 |
| 228152_s_at  | DDX60L                                                              | 0.73<br>2 | 1.66 | 2.15E-05 | 2.12E-04 |
| 227721_at    | CPAMD8                                                              | 0.73<br>2 | 1.66 | 9.90E-04 | 4.49E-03 |
| 242561_at    | IPO9                                                                | 0.73<br>1 | 1.66 | 3.97E-06 | 5.46E-05 |
| 209670_at    | TRAC                                                                | 0.73<br>1 | 1.66 | 4.38E-06 | 5.90E-05 |
| 206822_s_at  | L3MBTL1                                                             | 0.73<br>1 | 1.66 | 8.24E-04 | 3.87E-03 |
| 223220_s_at  | PARP9                                                               | 0.73<br>1 | 1.66 | 9.47E-07 | 1.71E-05 |
| 205204_at    | NMB                                                                 | 0.73<br>1 | 1.66 | 1.01E-04 | 7.31E-04 |
| 222139_at    | ERV3-2                                                              | 0.73<br>1 | 1.66 | 2.52E-04 | 1.52E-03 |
| 209906_at    | C3AR1                                                               | 0.73      | 1.66 | 1.15E-04 | 8.10E-04 |
| 229055_at    | GPR68                                                               | 0.73      | 1.66 | 1.18E-04 | 8.29E-04 |
| 204548_at    | STAR                                                                | 0.73      | 1.66 | 8.93E-07 | 1.63E-05 |
| 214169_at    | SUN1                                                                | 0.73      | 1.66 | 1.47E-04 | 9.92E-04 |
| 1568609_s_at | FLJ39739 /// LINC00623 /// LINC00869 /// LINC00875 ///<br>LOC728875 | 0.73      | 1.66 | 2.43E-06 | 3.68E-05 |
| 216546_s_at  | CHI3L1                                                              | 0.73      | 1.66 | 4.94E-03 | 1.63E-02 |
| 205571_at    | LIPT1                                                               | 0.73      | 1.66 | 1.60E-05 | 1.67E-04 |
| 209083_at    | CORO1A                                                              | 0.72<br>9 | 1.66 | 7.16E-06 | 8.70E-05 |
| 204052_s_at  | SFRP4                                                               | 0.72<br>9 | 1.66 | 4.07E-03 | 1.39E-02 |
| 230384_at    | ANKRD23                                                             | 0.72<br>9 | 1.66 | 1.01E-03 | 4.56E-03 |
| 210683_at    | NRTN                                                                | 0.72<br>9 | 1.66 | 1.47E-06 | 2.46E-05 |
| 222890_at    | CCDC113                                                             | 0.72<br>9 | 1.66 | 1.03E-07 | 2.96E-06 |

|              |                                                     |           |      |          |          |
|--------------|-----------------------------------------------------|-----------|------|----------|----------|
| 244398_x_at  | ZNF684                                              | 0.72<br>9 | 1.66 | 8.55E-08 | 2.57E-06 |
| 229230_at    | SLC51A                                              | 0.72<br>9 | 1.66 | 4.20E-09 | 2.25E-07 |
| 1556346_at   | COTL1                                               | 0.72<br>9 | 1.66 | 2.34E-05 | 2.27E-04 |
| 236204_at    | COPS8                                               | 0.72<br>9 | 1.66 | 1.17E-05 | 1.30E-04 |
| 206219_s_at  | VAV1                                                | 0.72<br>9 | 1.66 | 5.82E-06 | 7.39E-05 |
| 220615_s_at  | FAR2                                                | 0.72<br>8 | 1.66 | 1.30E-02 | 3.53E-02 |
| 222520_s_at  | IFT57                                               | 0.72<br>8 | 1.66 | 8.77E-05 | 6.53E-04 |
| 227131_at    | MAP3K3                                              | 0.72<br>8 | 1.66 | 1.05E-08 | 4.69E-07 |
| 229734_at    | MIR4697HG                                           | 0.72<br>7 | 1.66 | 2.30E-07 | 5.63E-06 |
| 1555898_at   | ANKRD36C                                            | 0.72<br>7 | 1.66 | 1.80E-06 | 2.88E-05 |
| 223276_at    | SMIM3                                               | 0.72<br>7 | 1.65 | 6.42E-04 | 3.18E-03 |
| 226201_at    | DOT1L                                               | 0.72<br>7 | 1.65 | 2.93E-04 | 1.71E-03 |
| 209770_at    | BTN3A1                                              | 0.72<br>6 | 1.65 | 6.92E-07 | 1.33E-05 |
| 226743_at    | SLFN11                                              | 0.72<br>6 | 1.65 | 1.05E-06 | 1.86E-05 |
| 230435_at    | FAM228B                                             | 0.72<br>6 | 1.65 | 4.07E-06 | 5.57E-05 |
| 226969_at    | MTR                                                 | 0.72<br>6 | 1.65 | 6.96E-09 | 3.39E-07 |
| 229509_at    | MFSD8                                               | 0.72<br>6 | 1.65 | 1.96E-09 | 1.22E-07 |
| 229603_at    | BBS12                                               | 0.72<br>5 | 1.65 | 7.24E-06 | 8.76E-05 |
| 226805_at    | FITM2                                               | 0.72<br>5 | 1.65 | 1.98E-06 | 3.11E-05 |
| 227217_at    | WNK2                                                | 0.72<br>5 | 1.65 | 1.27E-03 | 5.48E-03 |
| 204820_s_at  | BTN3A2 /// BTN3A3                                   | 0.72<br>5 | 1.65 | 1.03E-07 | 2.97E-06 |
| 1553746_a_at | OTOGL                                               | 0.72<br>5 | 1.65 | 8.42E-08 | 2.54E-06 |
| 222124_at    | HIF3A                                               | 0.72<br>5 | 1.65 | 9.89E-03 | 2.85E-02 |
| 210718_s_at  | ARL17A /// ARL17B /// LOC100294341 /// LOC100996709 | 0.72<br>4 | 1.65 | 9.29E-03 | 2.70E-02 |
| 228770_at    | GPR146                                              | 0.72<br>4 | 1.65 | 5.04E-05 | 4.18E-04 |
| 205776_at    | FMO5 /// LOC101060372                               | 0.72<br>4 | 1.65 | 6.51E-05 | 5.11E-04 |
| 218730_s_at  | OGN                                                 | 0.72<br>4 | 1.65 | 1.48E-02 | 3.94E-02 |
| 232686_at    | SIGLEC17P                                           | 0.72<br>3 | 1.65 | 4.75E-03 | 1.58E-02 |
| 211018_at    | LSS                                                 | 0.72<br>3 | 1.65 | 1.31E-04 | 9.04E-04 |
| 203158_s_at  | GLS                                                 | 0.72<br>3 | 1.65 | 1.63E-08 | 6.71E-07 |
| 220384_at    | NME8                                                | 0.72<br>3 | 1.65 | 1.24E-03 | 5.38E-03 |
| 210982_s_at  | HLA-DRA                                             | 0.72<br>3 | 1.65 | 2.95E-04 | 1.72E-03 |
| 212732_at    | MEG3                                                | 0.72<br>3 | 1.65 | 1.71E-05 | 1.76E-04 |



|              |                                         |           |      |          |          |
|--------------|-----------------------------------------|-----------|------|----------|----------|
| 1564139_at   | A2M-AS1                                 | 0.72<br>3 | 1.65 | 2.25E-06 | 3.46E-05 |
| 232812_at    | LOC401052                               | 0.72<br>2 | 1.65 | 1.16E-03 | 5.08E-03 |
| 244452_at    | ERLEC1                                  | 0.72<br>2 | 1.65 | 1.08E-03 | 4.83E-03 |
| 204158_s_at  | TCIRG1                                  | 0.72<br>2 | 1.65 | 6.14E-04 | 3.06E-03 |
| 226900_at    | GABPB1-AS1                              | 0.72<br>2 | 1.65 | 1.08E-07 | 3.08E-06 |
| 206804_at    | CD3G                                    | 0.72<br>2 | 1.65 | 7.36E-05 | 5.65E-04 |
| 213952_s_at  | ALOX5                                   | 0.72<br>2 | 1.65 | 2.23E-06 | 3.43E-05 |
| 229649_at    | NRXN3                                   | 0.72<br>1 | 1.65 | 3.31E-05 | 2.97E-04 |
| 206349_at    | LGI1                                    | 0.72<br>1 | 1.65 | 4.95E-06 | 6.50E-05 |
| 219870_at    | ATF7IP2                                 | 0.72<br>1 | 1.65 | 2.72E-06 | 4.04E-05 |
| 209500_x_at  | TNFSF12 /// TNFSF12-TNFSF13 /// TNFSF13 | 0.72<br>1 | 1.65 | 5.42E-06 | 6.99E-05 |
| 202962_at    | KIF13B                                  | 0.72<br>1 | 1.65 | 2.01E-06 | 3.16E-05 |
| 205042_at    | GNE                                     | 0.72<br>1 | 1.65 | 2.14E-04 | 1.33E-03 |
| 229887_at    | ALS2CL                                  | 0.72<br>1 | 1.65 | 1.33E-04 | 9.16E-04 |
| 236305_at    | RFESD                                   | 0.72<br>1 | 1.65 | 1.76E-04 | 1.14E-03 |
| 226745_at    | CYP4V2                                  | 0.72      | 1.65 | 7.20E-05 | 5.55E-04 |
| 219232_s_at  | EGLN3                                   | 0.72      | 1.65 | 2.73E-05 | 2.56E-04 |
| 207351_s_at  | SH2D2A                                  | 0.72      | 1.65 | 6.57E-06 | 8.09E-05 |
| 207840_at    | CD160 /// LOC101060629                  | 0.72      | 1.65 | 2.70E-05 | 2.54E-04 |
| 205905_s_at  | MICA /// MICB                           | 0.72      | 1.65 | 5.55E-06 | 7.10E-05 |
| 232222_at    | C18orf49 /// ZCCHC2                     | 0.72      | 1.65 | 2.78E-04 | 1.64E-03 |
| 213116_at    | NEK3                                    | 0.71<br>9 | 1.65 | 2.29E-07 | 5.62E-06 |
| 229003_x_at  | FAM69B                                  | 0.71<br>9 | 1.65 | 4.74E-04 | 2.50E-03 |
| 237411_at    | ADAMTS6                                 | 0.71<br>8 | 1.65 | 1.05E-03 | 4.69E-03 |
| 1564426_x_at | LOC729732                               | 0.71<br>8 | 1.65 | 1.34E-03 | 5.71E-03 |
| 1553260_s_at | ALS2CR11                                | 0.71<br>8 | 1.64 | 1.59E-04 | 1.05E-03 |
| 229842_at    | ELF3                                    | 0.71<br>8 | 1.64 | 2.35E-04 | 1.44E-03 |
| 227923_at    | SHANK3                                  | 0.71<br>8 | 1.64 | 2.23E-05 | 2.19E-04 |
| 210832_x_at  | PTGER3                                  | 0.71<br>8 | 1.64 | 3.61E-05 | 3.20E-04 |
| 227113_at    | ADHFE1                                  | 0.71<br>8 | 1.64 | 2.65E-05 | 2.51E-04 |
| 225763_at    | RCSD1                                   | 0.71<br>7 | 1.64 | 3.89E-07 | 8.42E-06 |
| 237719_x_at  | RGS7BP                                  | 0.71<br>7 | 1.64 | 2.39E-03 | 9.07E-03 |
| 1560981_a_at | PPARA                                   | 0.71<br>7 | 1.64 | 2.52E-04 | 1.52E-03 |
| 202638_s_at  | ICAM1                                   | 0.71<br>7 | 1.64 | 1.98E-04 | 1.25E-03 |
| 45749_at     | FAM65A                                  | 0.71<br>7 | 1.64 | 7.83E-10 | 5.66E-08 |

|             |                       |           |      |          |          |
|-------------|-----------------------|-----------|------|----------|----------|
| 1563369_at  | LINC00173             | 0.71<br>7 | 1.64 | 6.28E-04 | 3.12E-03 |
| 1568600_at  | CALML4                | 0.71<br>6 | 1.64 | 8.24E-06 | 9.76E-05 |
| 238422_at   | LBX2-AS1              | 0.71<br>6 | 1.64 | 2.98E-04 | 1.73E-03 |
| 217997_at   | PHLDA1                | 0.71<br>6 | 1.64 | 6.84E-04 | 3.33E-03 |
| 214255_at   | ATP10A                | 0.71<br>6 | 1.64 | 7.98E-07 | 1.49E-05 |
| 230499_at   | BIRC3                 | 0.71<br>6 | 1.64 | 9.79E-07 | 1.76E-05 |
| 204614_at   | SERPINB2              | 0.71<br>6 | 1.64 | 1.06E-03 | 4.75E-03 |
| 219990_at   | E2F8                  | 0.71<br>6 | 1.64 | 1.13E-05 | 1.26E-04 |
| 221523_s_at | RRAGD                 | 0.71<br>6 | 1.64 | 1.39E-06 | 2.35E-05 |
| 235515_at   | SYNE4                 | 0.71<br>5 | 1.64 | 1.08E-03 | 4.83E-03 |
| 204770_at   | TAP2                  | 0.71<br>5 | 1.64 | 6.37E-05 | 5.03E-04 |
| 206974_at   | CXCR6                 | 0.71<br>5 | 1.64 | 9.55E-06 | 1.10E-04 |
| 231562_at   | APOC2                 | 0.71<br>5 | 1.64 | 7.51E-07 | 1.42E-05 |
| 224456_s_at | FOXD2-AS1             | 0.71<br>5 | 1.64 | 3.20E-04 | 1.83E-03 |
| 226582_at   | LOC400043             | 0.71<br>4 | 1.64 | 8.45E-05 | 6.34E-04 |
| 228338_at   | C11orf93              | 0.71<br>4 | 1.64 | 1.77E-04 | 1.15E-03 |
| 217935_s_at | UQCC                  | 0.71<br>4 | 1.64 | 8.02E-08 | 2.45E-06 |
| 38241_at    | BTN3A3                | 0.71<br>4 | 1.64 | 1.89E-07 | 4.81E-06 |
| 215242_at   | LOC100505991 /// PIGC | 0.71<br>4 | 1.64 | 1.40E-06 | 2.37E-05 |
| 232792_at   | TRIM69                | 0.71<br>4 | 1.64 | 6.36E-05 | 5.02E-04 |
| 244246_at   | MIPOL1                | 0.71<br>4 | 1.64 | 8.05E-05 | 6.09E-04 |
| 209889_at   | SEC31B                | 0.71<br>3 | 1.64 | 1.94E-08 | 7.76E-07 |
| 230670_at   | IGSF10                | 0.71<br>3 | 1.64 | 9.49E-05 | 6.94E-04 |
| 229288_at   | EPHA7                 | 0.71<br>3 | 1.64 | 3.53E-04 | 1.98E-03 |
| 238135_at   | AGTRAP                | 0.71<br>3 | 1.64 | 3.02E-05 | 2.78E-04 |
| 202499_s_at | SLC2A3                | 0.71<br>3 | 1.64 | 7.13E-04 | 3.44E-03 |
| 213566_at   | RNASE6                | 0.71<br>3 | 1.64 | 1.27E-05 | 1.38E-04 |
| 231991_at   | CCM2L                 | 0.71<br>2 | 1.64 | 4.13E-04 | 2.24E-03 |
| 216250_s_at | LPXN                  | 0.71<br>2 | 1.64 | 3.54E-08 | 1.27E-06 |
| 213706_at   | GPD1                  | 0.71<br>2 | 1.64 | 9.25E-03 | 2.69E-02 |
| 230206_at   | DOCK5                 | 0.71<br>2 | 1.64 | 4.22E-08 | 1.45E-06 |
| 221988_at   | SMIM7                 | 0.71<br>2 | 1.64 | 3.31E-05 | 2.98E-04 |
| 231345_s_at | DHRS12                | 0.71<br>2 | 1.64 | 6.47E-09 | 3.19E-07 |

|              |            |           |      |          |          |
|--------------|------------|-----------|------|----------|----------|
| 213143_at    | C2orf72    | 0.71<br>1 | 1.64 | 2.61E-03 | 9.75E-03 |
| 236320_at    | CCDC17     | 0.71<br>1 | 1.64 | 4.45E-06 | 5.97E-05 |
| 233516_s_at  | SPAG17     | 0.71<br>1 | 1.64 | 1.65E-03 | 6.73E-03 |
| 229608_at    | FAM212B    | 0.71      | 1.64 | 5.46E-09 | 2.83E-07 |
| 206518_s_at  | RGS9       | 0.71      | 1.64 | 2.97E-07 | 6.90E-06 |
| 210194_at    | PLA2R1     | 0.71      | 1.64 | 1.59E-05 | 1.65E-04 |
| 231062_at    | DOCK9-AS2  | 0.71      | 1.64 | 2.08E-04 | 1.30E-03 |
| 216512_s_at  | DCT        | 0.71      | 1.64 | 2.32E-03 | 8.85E-03 |
| 204022_at    | WWP2       | 0.71      | 1.64 | 7.95E-07 | 1.49E-05 |
| 244704_at    | NFYB       | 0.71      | 1.64 | 2.43E-06 | 3.68E-05 |
| 226814_at    | ADAMTS9    | 0.71      | 1.64 | 5.65E-05 | 4.57E-04 |
| 221218_s_at  | TPK1       | 0.70<br>9 | 1.64 | 7.36E-08 | 2.30E-06 |
| 204773_at    | IL11RA     | 0.70<br>9 | 1.64 | 6.84E-10 | 5.12E-08 |
| 202269_x_at  | GBP1       | 0.70<br>9 | 1.63 | 4.52E-05 | 3.83E-04 |
| 210325_at    | CD1A       | 0.70<br>9 | 1.63 | 1.92E-05 | 1.94E-04 |
| 231430_at    | FAM181B    | 0.70<br>9 | 1.63 | 2.85E-05 | 2.64E-04 |
| 1565737_at   | SCTR       | 0.70<br>9 | 1.63 | 7.63E-04 | 3.63E-03 |
| 243446_at    | AJUBA      | 0.70<br>8 | 1.63 | 1.83E-04 | 1.18E-03 |
| 204639_at    | ADA        | 0.70<br>8 | 1.63 | 1.77E-04 | 1.15E-03 |
| 205307_s_at  | KMO        | 0.70<br>8 | 1.63 | 1.90E-05 | 1.92E-04 |
| 217418_x_at  | MS4A1      | 0.70<br>8 | 1.63 | 1.13E-03 | 4.97E-03 |
| 1552501_a_at | GPBAR1     | 0.70<br>8 | 1.63 | 1.49E-04 | 1.00E-03 |
| 238121_at    | GK5        | 0.70<br>8 | 1.63 | 1.89E-05 | 1.91E-04 |
| 204468_s_at  | TIE1       | 0.70<br>8 | 1.63 | 1.79E-06 | 2.87E-05 |
| 230012_at    | LINC00324  | 0.70<br>8 | 1.63 | 2.00E-05 | 2.00E-04 |
| 211470_s_at  | SULT1C2    | 0.70<br>8 | 1.63 | 1.52E-02 | 4.01E-02 |
| 205839_s_at  | BZRAP1     | 0.70<br>8 | 1.63 | 7.04E-08 | 2.23E-06 |
| 233510_s_at  | PARVG      | 0.70<br>8 | 1.63 | 9.37E-05 | 6.87E-04 |
| 207992_s_at  | AMPD3      | 0.70<br>8 | 1.63 | 5.78E-05 | 4.64E-04 |
| 229175_at    | SMYD4      | 0.70<br>7 | 1.63 | 3.79E-07 | 8.25E-06 |
| 218760_at    | COQ6       | 0.70<br>7 | 1.63 | 4.56E-07 | 9.50E-06 |
| 211303_x_at  | FOLH1B     | 0.70<br>6 | 1.63 | 1.02E-04 | 7.33E-04 |
| 230631_s_at  | IL10RB-AS1 | 0.70<br>5 | 1.63 | 1.18E-03 | 5.17E-03 |
| 221924_at    | ZMIZ2      | 0.70<br>5 | 1.63 | 5.51E-06 | 7.08E-05 |
| 205893_at    | NLGN1      | 0.70<br>5 | 1.63 | 3.37E-07 | 7.54E-06 |

|              |                                          |           |      |          |          |
|--------------|------------------------------------------|-----------|------|----------|----------|
| 235290_at    | ZNF782                                   | 0.70<br>5 | 1.63 | 1.14E-03 | 5.02E-03 |
| 225545_at    | EEF2K /// LOC101060570                   | 0.70<br>5 | 1.63 | 3.74E-08 | 1.33E-06 |
| 231635_x_at  | RNF31                                    | 0.70<br>4 | 1.63 | 1.69E-06 | 2.74E-05 |
| 228186_s_at  | RSPO3                                    | 0.70<br>4 | 1.63 | 1.50E-03 | 6.23E-03 |
| 209699_x_at  | AKR1C2 /// LOC101060798                  | 0.70<br>4 | 1.63 | 2.30E-05 | 2.23E-04 |
| 244629_s_at  | PDPK1                                    | 0.70<br>4 | 1.63 | 1.01E-03 | 4.55E-03 |
| 230351_at    | FGF14-AS2                                | 0.70<br>3 | 1.63 | 7.69E-07 | 1.45E-05 |
| 1569886_a_at | GLB1L3                                   | 0.70<br>3 | 1.63 | 3.28E-04 | 1.87E-03 |
| 229302_at    | TMEM178A                                 | 0.70<br>3 | 1.63 | 3.03E-05 | 2.78E-04 |
| 210072_at    | CCL19                                    | 0.70<br>3 | 1.63 | 8.77E-04 | 4.06E-03 |
| 210102_at    | VWA5A                                    | 0.70<br>3 | 1.63 | 1.00E-04 | 7.26E-04 |
| 230234_at    | FXN                                      | 0.70<br>3 | 1.63 | 6.33E-06 | 7.86E-05 |
| 228771_at    | ADRBK2                                   | 0.70<br>2 | 1.63 | 1.09E-04 | 7.80E-04 |
| 227753_at    | TMEM139                                  | 0.70<br>2 | 1.63 | 1.32E-03 | 5.64E-03 |
| 202665_s_at  | WIPF1                                    | 0.70<br>2 | 1.63 | 1.89E-06 | 3.00E-05 |
| 1564707_x_at | GLS2                                     | 0.70<br>2 | 1.63 | 9.76E-05 | 7.09E-04 |
| 204106_at    | TESK1                                    | 0.70<br>1 | 1.63 | 8.00E-06 | 9.53E-05 |
| 205236_x_at  | SOD3                                     | 0.70<br>1 | 1.63 | 1.65E-03 | 6.71E-03 |
| 235670_at    | STX11                                    | 0.70<br>1 | 1.63 | 9.07E-06 | 1.05E-04 |
| 202888_s_at  | ANPEP                                    | 0.70<br>1 | 1.63 | 7.50E-08 | 2.33E-06 |
| 218821_at    | LOC100652930 /// NPEPL1 /// STX16-NPEPL1 | 0.70<br>1 | 1.63 | 9.46E-07 | 1.71E-05 |
| 60471_at     | RIN3                                     | 0.7       | 1.62 | 4.61E-09 | 2.43E-07 |
| 218638_s_at  | LOC100130872 /// SPON2                   | 0.7       | 1.62 | 6.74E-05 | 5.26E-04 |
| 203929_s_at  | MAPT                                     | 0.7       | 1.62 | 1.07E-05 | 1.21E-04 |
| 1557236_at   | APOL6                                    | 0.7       | 1.62 | 3.33E-05 | 2.99E-04 |
| 229211_at    | DUSP28                                   | 0.7       | 1.62 | 4.90E-08 | 1.65E-06 |
| 223995_at    | SLC12A9                                  | 0.69<br>9 | 1.62 | 1.99E-04 | 1.26E-03 |
| 221024_s_at  | SLC2A10                                  | 0.69<br>9 | 1.62 | 2.93E-05 | 2.71E-04 |
| 52975_at     | MVB12B                                   | 0.69<br>9 | 1.62 | 6.23E-05 | 4.94E-04 |
| 226804_at    | FAM20A                                   | 0.69<br>9 | 1.62 | 2.98E-06 | 4.34E-05 |
| 1552509_a_at | CD300LG                                  | 0.69<br>8 | 1.62 | 1.31E-02 | 3.57E-02 |
| 228984_at    | CARNS1                                   | 0.69<br>8 | 1.62 | 2.64E-07 | 6.27E-06 |
| 1431_at      | CYP2E1                                   | 0.69<br>8 | 1.62 | 1.94E-05 | 1.95E-04 |
| 223636_at    | ZMYND12                                  | 0.69<br>8 | 1.62 | 7.77E-05 | 5.91E-04 |
| 205100_at    | GFPT2                                    | 0.69      | 1.62 | 1.44E-06 | 2.42E-05 |

|              |           | 8    |   |      |          |          |
|--------------|-----------|------|---|------|----------|----------|
| 1558552_s_at | C3orf55   | 0.69 | 7 | 1.62 | 8.99E-03 | 2.64E-02 |
| 232513_x_at  | FAM209B   | 0.69 | 7 | 1.62 | 9.03E-11 | 9.48E-09 |
| 232001_at    | PRKCQ-AS1 | 0.69 | 7 | 1.62 | 6.18E-03 | 1.95E-02 |
| 212451_at    | SECISBP2L | 0.69 | 7 | 1.62 | 1.32E-04 | 9.11E-04 |
| 232424_at    | PRDM16    | 0.69 | 6 | 1.62 | 3.52E-03 | 1.24E-02 |
| 222123_s_at  | HIF3A     | 0.69 | 6 | 1.62 | 2.21E-04 | 1.37E-03 |
| 209791_at    | PADI2     | 0.69 | 6 | 1.62 | 4.15E-04 | 2.25E-03 |
| 206747_at    | GPRIN2    | 0.69 | 6 | 1.62 | 8.59E-04 | 3.99E-03 |
| 238253_at    | WDR72     | 0.69 | 5 | 1.62 | 1.27E-03 | 5.47E-03 |
| 229326_at    | TNFSF13   | 0.69 | 5 | 1.62 | 2.04E-04 | 1.28E-03 |
| 205330_at    | MN1       | 0.69 | 5 | 1.62 | 1.33E-05 | 1.43E-04 |
| 204368_at    | SLCO2A1   | 0.69 | 4 | 1.62 | 2.41E-06 | 3.66E-05 |
| 210861_s_at  | WISP3     | 0.69 | 4 | 1.62 | 8.96E-03 | 2.63E-02 |
| 1555912_at   | ST7-AS1   | 0.69 | 4 | 1.62 | 1.45E-07 | 3.93E-06 |
| 235199_at    | RNF125    | 0.69 | 4 | 1.62 | 3.70E-09 | 2.04E-07 |
| 205447_s_at  | MAP3K12   | 0.69 | 4 | 1.62 | 4.40E-05 | 3.74E-04 |
| 1558971_at   | THEMIS    | 0.69 | 3 | 1.62 | 6.33E-06 | 7.86E-05 |
| 222108_at    | AMIGO2    | 0.69 | 3 | 1.62 | 3.95E-03 | 1.36E-02 |
| 222171_s_at  | PKNOX2    | 0.69 | 3 | 1.62 | 1.01E-06 | 1.80E-05 |
| 213750_at    | RSL1D1    | 0.69 | 2 | 1.62 | 8.52E-07 | 1.57E-05 |
| 219461_at    | PAK6      | 0.69 | 2 | 1.62 | 8.86E-05 | 6.58E-04 |
| 229357_at    | ADAMTS5   | 0.69 | 2 | 1.62 | 2.85E-04 | 1.67E-03 |
| 235867_at    | GSTM3     | 0.69 | 2 | 1.62 | 2.74E-03 | 1.01E-02 |
| 207238_s_at  | PTPRC     | 0.69 | 2 | 1.62 | 6.12E-04 | 3.06E-03 |
| 242204_at    | WFDC5     | 0.69 | 2 | 1.62 | 2.40E-03 | 9.08E-03 |
| 244008_at    | PARP8     | 0.69 | 2 | 1.62 | 1.07E-06 | 1.89E-05 |
| 234305_s_at  | GSDMC     | 0.69 | 2 | 1.62 | 3.85E-03 | 1.33E-02 |
| 215559_at    | ABCC6     | 0.69 | 1 | 1.61 | 5.65E-04 | 2.86E-03 |
| 229199_at    | SCN9A     | 0.69 | 1 | 1.61 | 9.79E-05 | 7.11E-04 |
| 227251_at    | DCAF5     | 0.69 | 1 | 1.61 | 4.74E-06 | 6.28E-05 |
| 204500_s_at  | AGTPBP1   | 0.69 | 1 | 1.61 | 3.07E-06 | 4.43E-05 |
| 1562644_at   | MTHFD2L   | 0.69 | 1 | 1.61 | 3.02E-04 | 1.75E-03 |
| 222134_at    | DDO       | 0.69 | 1 | 1.61 | 8.82E-04 | 4.08E-03 |

|              |          |      |      |          |          |
|--------------|----------|------|------|----------|----------|
| 244660_at    | ELAVL1   | 0.69 | 1.61 | 7.40E-05 | 5.68E-04 |
| 220784_s_at  | UTS2     | 0.69 | 1.61 | 1.05E-02 | 2.98E-02 |
| 235666_at    | ITGA8    | 0.68 | 9    | 1.61     | 3.99E-03 |
| 203661_s_at  | TMOD1    | 0.68 | 9    | 1.61     | 3.62E-06 |
| 219359_at    | ATHL1    | 0.68 | 9    | 1.61     | 6.55E-04 |
| 229824_at    | SHC3     | 0.68 | 9    | 1.61     | 7.26E-08 |
| 36129_at     | SGSM2    | 0.68 | 9    | 1.61     | 2.04E-04 |
| 1553635_s_at | TCTEX1D1 | 0.68 | 9    | 1.61     | 2.55E-04 |
| 237395_at    | CYP4Z1   | 0.68 | 9    | 1.61     | 1.41E-02 |
| 228032_s_at  | DENND1B  | 0.68 | 8    | 1.61     | 6.27E-11 |
| 217371_s_at  | IL15     | 0.68 | 7    | 1.61     | 1.27E-05 |
| 212196_at    | IL6ST    | 0.68 | 7    | 1.61     | 2.47E-06 |
| 213124_at    | ZNF473   | 0.68 | 7    | 1.61     | 1.66E-05 |
| 213589_s_at  | B3GNTL1  | 0.68 | 7    | 1.61     | 1.96E-04 |
| 220848_x_at  | OBP2A    | 0.68 | 7    | 1.61     | 6.24E-06 |
| 206838_at    | TBX19    | 0.68 | 6    | 1.61     | 6.39E-06 |
| 226618_at    | UBE2QL1  | 0.68 | 6    | 1.61     | 2.33E-05 |
| 228548_at    | RAP1A    | 0.68 | 6    | 1.61     | 1.26E-05 |
| 217076_s_at  | HOXD3    | 0.68 | 6    | 1.61     | 1.40E-04 |
| 242033_at    | RNF180   | 0.68 | 6    | 1.61     | 3.53E-04 |
| 218164_at    | SPATA20  | 0.68 | 6    | 1.61     | 1.05E-03 |
| 239767_at    | LRRC7    | 0.68 | 5    | 1.61     | 4.02E-04 |
| 214070_s_at  | ATP10B   | 0.68 | 5    | 1.61     | 4.77E-04 |
| 223500_at    | CPLX1    | 0.68 | 5    | 1.61     | 4.27E-05 |
| 209892_at    | FUT4     | 0.68 | 4    | 1.61     | 1.88E-05 |
| 229954_at    | CHDH     | 0.68 | 4    | 1.61     | 3.35E-04 |
| 227145_at    | LOXL4    | 0.68 | 4    | 1.61     | 1.13E-05 |
| 214308_s_at  | HGD      | 0.68 | 3    | 1.61     | 1.62E-03 |
| 203951_at    | CNN1     | 0.68 | 3    | 1.61     | 4.54E-03 |
| 232073_at    | PPFIA2   | 0.68 | 3    | 1.61     | 4.14E-06 |
| 235749_at    | UGGT2    | 0.68 | 3    | 1.61     | 3.08E-05 |
| 221921_s_at  | CADM3    | 0.68 | 3    | 1.61     | 8.39E-05 |
| 236834_at    | SCFD2    | 0.68 | 3    | 1.61     | 2.26E-05 |
| 224856_at    | FKBP5    | 0.68 | 2    | 1.6      | 9.52E-04 |

|              |                                       |           |     |          |          |
|--------------|---------------------------------------|-----------|-----|----------|----------|
| 210874_s_at  | NAT6                                  | 0.68<br>2 | 1.6 | 1.82E-07 | 4.67E-06 |
| 243076_x_at  | GLI4                                  | 0.68<br>2 | 1.6 | 2.42E-07 | 5.87E-06 |
| 210375_at    | PTGER3                                | 0.68<br>2 | 1.6 | 3.57E-04 | 1.99E-03 |
| 217525_at    | OLFML1                                | 0.68<br>2 | 1.6 | 1.38E-04 | 9.45E-04 |
| 40569_at     | MZF1                                  | 0.68<br>2 | 1.6 | 9.75E-04 | 4.43E-03 |
| 205247_at    | NOTCH4                                | 0.68<br>2 | 1.6 | 7.73E-04 | 3.67E-03 |
| 229722_at    | LOC100270804                          | 0.68<br>2 | 1.6 | 4.12E-09 | 2.23E-07 |
| 219947_at    | CLEC4A                                | 0.68<br>2 | 1.6 | 2.62E-06 | 3.92E-05 |
| 236108_at    | EPG5                                  | 0.68<br>1 | 1.6 | 4.69E-04 | 2.48E-03 |
| 220112_at    | ANKRD55                               | 0.68<br>1 | 1.6 | 4.21E-05 | 3.62E-04 |
| 230593_at    | GRIK3                                 | 0.68<br>1 | 1.6 | 5.45E-06 | 7.02E-05 |
| 239547_at    | HS3ST6                                | 0.68<br>1 | 1.6 | 1.58E-04 | 1.05E-03 |
| 240806_at    | RPL15                                 | 0.68<br>1 | 1.6 | 1.54E-06 | 2.54E-05 |
| 1554004_a_at | ARHGEF28                              | 0.68<br>1 | 1.6 | 7.87E-05 | 5.97E-04 |
| 238862_at    | MFSD4                                 | 0.68<br>1 | 1.6 | 5.17E-07 | 1.05E-05 |
| 214846_s_at  | ALPK3                                 | 0.68<br>1 | 1.6 | 6.84E-03 | 2.12E-02 |
| 206606_at    | LIPC                                  | 0.68      | 1.6 | 1.75E-04 | 1.14E-03 |
| 228426_at    | CLEC2D                                | 0.68      | 1.6 | 1.72E-03 | 6.97E-03 |
| 236915_at    | C4orf47                               | 0.68      | 1.6 | 3.79E-03 | 1.32E-02 |
| 58780_s_at   | ARHGEF40                              | 0.68      | 1.6 | 2.20E-05 | 2.16E-04 |
| 229395_at    | STX4                                  | 0.68      | 1.6 | 1.64E-05 | 1.70E-04 |
| 223805_at    | OSBPL6                                | 0.68      | 1.6 | 2.57E-04 | 1.54E-03 |
| 227072_at    | RTTN                                  | 0.67<br>9 | 1.6 | 2.93E-08 | 1.10E-06 |
| 232523_at    | MEGF10                                | 0.67<br>9 | 1.6 | 9.83E-03 | 2.83E-02 |
| 214285_at    | FABP3                                 | 0.67<br>9 | 1.6 | 5.06E-08 | 1.69E-06 |
| 1568752_s_at | RGS13                                 | 0.67<br>9 | 1.6 | 5.49E-03 | 1.78E-02 |
| 1552283_s_at | LOC100996904 /// ZDHHC11 /// ZDHHC11B | 0.67<br>9 | 1.6 | 2.44E-03 | 9.20E-03 |
| 240429_at    | ZNF546                                | 0.67<br>9 | 1.6 | 2.00E-04 | 1.26E-03 |
| 209501_at    | CDR2                                  | 0.67<br>8 | 1.6 | 4.01E-05 | 3.49E-04 |
| 228104_at    | PLXNA4                                | 0.67<br>8 | 1.6 | 5.12E-04 | 2.65E-03 |
| 236548_at    | GIPC2                                 | 0.67<br>8 | 1.6 | 5.54E-04 | 2.83E-03 |
| 244578_at    | LCP2                                  | 0.67<br>8 | 1.6 | 6.51E-04 | 3.21E-03 |
| 205495_s_at  | GNLY                                  | 0.67<br>8 | 1.6 | 3.98E-05 | 3.47E-04 |
| 226207_at    | RILPL1                                | 0.67<br>7 | 1.6 | 1.24E-05 | 1.36E-04 |
| 204070_at    | RARRES3                               | 0.67<br>7 | 1.6 | 3.86E-07 | 8.38E-06 |

|              |                       |           |      |          |          |
|--------------|-----------------------|-----------|------|----------|----------|
| 1560762_at   | LOC285972             | 0.67<br>7 | 1.6  | 1.43E-03 | 6.02E-03 |
| 1569701_at   | PER3                  | 0.67<br>7 | 1.6  | 2.43E-05 | 2.34E-04 |
| 241437_s_at  | EP400NL               | 0.67<br>7 | 1.6  | 3.94E-06 | 5.43E-05 |
| 219886_at    | CEP97                 | 0.67<br>7 | 1.6  | 1.19E-04 | 8.37E-04 |
| 226673_at    | SH2D3C                | 0.67<br>6 | 1.6  | 2.69E-07 | 6.36E-06 |
| 205067_at    | IL1B                  | 0.67<br>6 | 1.6  | 6.30E-03 | 1.98E-02 |
| 35148_at     | TJP3                  | 0.67<br>6 | 1.6  | 1.04E-04 | 7.50E-04 |
| 218776_s_at  | TMEM62                | 0.67<br>6 | 1.6  | 3.56E-11 | 4.28E-09 |
| 203579_s_at  | SLC7A6                | 0.67<br>6 | 1.6  | 8.11E-08 | 2.47E-06 |
| 224701_at    | PARP14                | 0.67<br>6 | 1.6  | 4.76E-08 | 1.61E-06 |
| 227733_at    | TMEM63C               | 0.67<br>6 | 1.6  | 2.15E-03 | 8.35E-03 |
| 236132_at    | TLN1                  | 0.67<br>6 | 1.6  | 5.97E-06 | 7.54E-05 |
| 209716_at    | CSF1                  | 0.67<br>5 | 1.6  | 8.59E-08 | 2.58E-06 |
| 230433_at    | LOC729970             | 0.67<br>5 | 1.6  | 2.38E-06 | 3.62E-05 |
| 233621_s_at  | ARHGEF12              | 0.67<br>5 | 1.6  | 5.00E-04 | 2.60E-03 |
| 204294_at    | AMT                   | 0.67<br>5 | 1.6  | 3.80E-04 | 2.10E-03 |
| 226448_at    | FAM89A /// MIR1182    | 0.67<br>5 | 1.6  | 1.92E-04 | 1.22E-03 |
| 218924_s_at  | CTBS                  | 0.67<br>5 | 1.6  | 5.57E-06 | 7.13E-05 |
| 205203_at    | PLD1                  | 0.67<br>5 | 1.6  | 1.15E-04 | 8.11E-04 |
| 205399_at    | DCLK1                 | 0.67<br>5 | 1.6  | 1.71E-05 | 1.76E-04 |
| 219723_x_at  | AGPAT3                | 0.67<br>5 | 1.6  | 3.38E-04 | 1.91E-03 |
| 227966_s_at  | CCDC74A /// CCDC74B   | 0.67<br>4 | 1.6  | 2.28E-06 | 3.50E-05 |
| 228504_at    | SCN7A                 | 0.67<br>4 | 1.6  | 5.35E-05 | 4.37E-04 |
| 236541_at    | ARSA                  | 0.67<br>4 | 1.6  | 7.33E-07 | 1.40E-05 |
| 210576_at    | CYP4F8                | 0.67<br>4 | 1.6  | 1.00E-02 | 2.87E-02 |
| 38149_at     | ARHGAP25              | 0.67<br>4 | 1.6  | 2.23E-07 | 5.53E-06 |
| 224964_s_at  | GNG2                  | 0.67<br>4 | 1.6  | 1.27E-05 | 1.38E-04 |
| 238453_at    | FGFBP3                | 0.67<br>4 | 1.59 | 2.68E-06 | 4.00E-05 |
| 227002_at    | FAM78A                | 0.67<br>3 | 1.59 | 1.89E-07 | 4.81E-06 |
| 226777_at    | ADAM12 /// ADAM12-OT1 | 0.67<br>3 | 1.59 | 2.09E-03 | 8.13E-03 |
| 1555476_at   | IREB2                 | 0.67<br>3 | 1.59 | 4.39E-03 | 1.48E-02 |
| 1569107_s_at | ZFP69                 | 0.67<br>3 | 1.59 | 2.00E-04 | 1.26E-03 |
| 226072_at    | FUK                   | 0.67<br>3 | 1.59 | 3.20E-06 | 4.59E-05 |



|              |                                                                                                                                                    |           |      |          |          |
|--------------|----------------------------------------------------------------------------------------------------------------------------------------------------|-----------|------|----------|----------|
| 243481_at    | RHOJ                                                                                                                                               | 0.67<br>2 | 1.59 | 5.28E-05 | 4.34E-04 |
| 228489_at    | TM4SF18                                                                                                                                            | 0.67<br>2 | 1.59 | 1.13E-04 | 8.03E-04 |
| 227081_at    | DNALI1                                                                                                                                             | 0.67<br>2 | 1.59 | 1.55E-05 | 1.63E-04 |
| 238977_at    | MCM6                                                                                                                                               | 0.67<br>2 | 1.59 | 3.92E-05 | 3.42E-04 |
| 1556639_at   | LOC100996455                                                                                                                                       | 0.67<br>2 | 1.59 | 3.01E-05 | 2.77E-04 |
| 243602_at    | MGC40069                                                                                                                                           | 0.67<br>1 | 1.59 | 2.13E-04 | 1.32E-03 |
| 215119_at    | MYO16                                                                                                                                              | 0.67<br>1 | 1.59 | 1.83E-02 | 4.66E-02 |
| 226517_at    | BCAT1                                                                                                                                              | 0.67<br>1 | 1.59 | 1.92E-05 | 1.93E-04 |
| 1556224_a_at | LOC155060 /// ZNF783                                                                                                                               | 0.67<br>1 | 1.59 | 6.53E-06 | 8.05E-05 |
| 1559716_at   | INO80C                                                                                                                                             | 0.67<br>1 | 1.59 | 3.15E-05 | 2.87E-04 |
| 238663_x_at  | GRIA4                                                                                                                                              | 0.67<br>1 | 1.59 | 2.50E-04 | 1.51E-03 |
| 235306_at    | GIMAP8                                                                                                                                             | 0.67<br>1 | 1.59 | 2.84E-06 | 4.17E-05 |
| 37384_at     | PPM1F                                                                                                                                              | 0.67<br>1 | 1.59 | 2.61E-05 | 2.48E-04 |
| 227946_at    | OSBPL7                                                                                                                                             | 0.67<br>1 | 1.59 | 2.01E-04 | 1.27E-03 |
| 236468_at    | TMEM132B                                                                                                                                           | 0.67<br>1 | 1.59 | 1.09E-04 | 7.81E-04 |
| 212159_x_at  | AP2A2                                                                                                                                              | 0.67      | 1.59 | 3.55E-07 | 7.86E-06 |
| 238484_s_at  | SSBP2                                                                                                                                              | 0.67      | 1.59 | 1.01E-05 | 1.16E-04 |
| 239201_at    | CDK15                                                                                                                                              | 0.67      | 1.59 | 1.96E-04 | 1.24E-03 |
| 1569453_a_at | LOC692247                                                                                                                                          | 0.67      | 1.59 | 9.50E-03 | 2.75E-02 |
| 226388_at    | TCEA3                                                                                                                                              | 0.67      | 1.59 | 7.40E-08 | 2.31E-06 |
| 210017_at    | MALT1                                                                                                                                              | 0.67      | 1.59 | 3.67E-07 | 8.05E-06 |
| 221875_x_at  | HLA-F                                                                                                                                              | 0.67      | 1.59 | 2.65E-05 | 2.51E-04 |
| 238669_at    | PTGS1                                                                                                                                              | 0.67      | 1.59 | 2.78E-06 | 4.11E-05 |
| 231783_at    | CHRM1                                                                                                                                              | 0.67      | 1.59 | 4.67E-07 | 9.68E-06 |
| 231372_at    | SLC25A48                                                                                                                                           | 0.67      | 1.59 | 4.79E-04 | 2.52E-03 |
| 229625_at    | GBP5                                                                                                                                               | 0.67      | 1.59 | 8.52E-05 | 6.38E-04 |
| 241368_at    | PLIN5                                                                                                                                              | 0.67      | 1.59 | 3.05E-05 | 2.79E-04 |
| 204231_s_at  | FAAH                                                                                                                                               | 0.67      | 1.59 | 4.80E-05 | 4.02E-04 |
| 223809_at    | RGS18                                                                                                                                              | 0.66<br>9 | 1.59 | 8.05E-03 | 2.42E-02 |
| 235352_at    | MR1                                                                                                                                                | 0.66<br>9 | 1.59 | 1.62E-06 | 2.64E-05 |
| 223845_at    | VSIG10                                                                                                                                             | 0.66<br>9 | 1.59 | 1.24E-07 | 3.47E-06 |
| 214099_s_at  | LOC100996724 /// LOC100996761 /// LOC101060291 ///<br>LOC101060344 /// LOC101060353 /// LOC101060463 ///<br>LOC101060582 /// LOC728802 /// PDE4DIP | 0.66<br>9 | 1.59 | 4.92E-03 | 1.63E-02 |
| 228482_at    | CDRT4 /// TVP23C-CDRT4                                                                                                                             | 0.66<br>8 | 1.59 | 6.05E-06 | 7.62E-05 |
| 238458_at    | MICU3                                                                                                                                              | 0.66<br>8 | 1.59 | 6.48E-04 | 3.20E-03 |
| 238332_at    | ANKRD29                                                                                                                                            | 0.66<br>8 | 1.59 | 1.02E-03 | 4.61E-03 |
| 206560_s_at  | MIA                                                                                                                                                | 0.66<br>8 | 1.59 | 7.09E-04 | 3.43E-03 |

|              |         |           |      |          |          |
|--------------|---------|-----------|------|----------|----------|
| 226766_at    | ROBO2   | 0.66<br>8 | 1.59 | 2.19E-04 | 1.36E-03 |
| 225847_at    | NCEH1   | 0.66<br>8 | 1.59 | 4.80E-06 | 6.34E-05 |
| 34210_at     | CD52    | 0.66<br>7 | 1.59 | 5.86E-04 | 2.95E-03 |
| 212611_at    | DTX4    | 0.66<br>7 | 1.59 | 2.86E-04 | 1.68E-03 |
| 215192_at    | PMS2P4  | 0.66<br>7 | 1.59 | 2.70E-03 | 1.00E-02 |
| 205794_s_at  | NOVA1   | 0.66<br>7 | 1.59 | 3.17E-03 | 1.14E-02 |
| 1556579_s_at | IGSF10  | 0.66<br>6 | 1.59 | 9.26E-05 | 6.81E-04 |
| 213422_s_at  | MXRA8   | 0.66<br>6 | 1.59 | 3.11E-05 | 2.84E-04 |
| 223549_s_at  | ESPN    | 0.66<br>6 | 1.59 | 1.24E-04 | 8.68E-04 |
| 229256_at    | PGM2L1  | 0.66<br>6 | 1.59 | 7.87E-05 | 5.97E-04 |
| 232102_at    | METTL6  | 0.66<br>6 | 1.59 | 7.63E-05 | 5.83E-04 |
| 203119_at    | CCDC86  | 0.66<br>6 | 1.59 | 3.43E-06 | 4.86E-05 |
| 1563549_a_at | ANO8    | 0.66<br>5 | 1.59 | 1.57E-05 | 1.64E-04 |
| 224414_s_at  | CARD6   | 0.66<br>5 | 1.59 | 5.72E-04 | 2.89E-03 |
| 203814_s_at  | NQO2    | 0.66<br>5 | 1.59 | 9.20E-05 | 6.78E-04 |
| 207900_at    | CCL17   | 0.66<br>5 | 1.59 | 1.19E-03 | 5.21E-03 |
| 235975_at    | MTO1    | 0.66<br>5 | 1.59 | 2.81E-05 | 2.62E-04 |
| 205212_s_at  | ACAP1   | 0.66<br>5 | 1.59 | 4.70E-07 | 9.72E-06 |
| 236618_at    | MROH8   | 0.66<br>5 | 1.59 | 1.37E-04 | 9.38E-04 |
| 230104_s_at  | TPPP    | 0.66<br>4 | 1.58 | 7.04E-04 | 3.41E-03 |
| 213727_x_at  | MPPE1   | 0.66<br>4 | 1.58 | 2.94E-08 | 1.10E-06 |
| 235677_at    | SRR     | 0.66<br>4 | 1.58 | 1.25E-06 | 2.15E-05 |
| 227240_at    | NGEF    | 0.66<br>4 | 1.58 | 8.31E-07 | 1.54E-05 |
| 235458_at    | HAVCR2  | 0.66<br>3 | 1.58 | 4.73E-05 | 3.97E-04 |
| 231577_s_at  | GBP1    | 0.66<br>3 | 1.58 | 1.18E-03 | 5.16E-03 |
| 203108_at    | GPRC5A  | 0.66<br>3 | 1.58 | 5.36E-03 | 1.75E-02 |
| 220034_at    | IRAK3   | 0.66<br>3 | 1.58 | 7.80E-07 | 1.47E-05 |
| 210548_at    | CCL23   | 0.66<br>3 | 1.58 | 4.07E-04 | 2.21E-03 |
| 224925_at    | PREX1   | 0.66<br>3 | 1.58 | 8.33E-06 | 9.86E-05 |
| 218717_s_at  | LEPREL1 | 0.66<br>3 | 1.58 | 4.02E-06 | 5.51E-05 |
| 231026_at    | EFHC1   | 0.66<br>2 | 1.58 | 5.55E-04 | 2.83E-03 |
| 201802_at    | SLC29A1 | 0.66<br>2 | 1.58 | 1.20E-08 | 5.23E-07 |
| 240512_x_at  | KCTD4   | 0.66<br>2 | 1.58 | 1.78E-03 | 7.16E-03 |

|             |                 |           |      |          |          |
|-------------|-----------------|-----------|------|----------|----------|
| 238793_at   | TIGD7           | 0.66<br>2 | 1.58 | 2.32E-04 | 1.42E-03 |
| 205685_at   | CD86            | 0.66<br>2 | 1.58 | 3.52E-08 | 1.27E-06 |
| 209765_at   | ADAM19          | 0.66<br>2 | 1.58 | 2.24E-04 | 1.38E-03 |
| 226984_at   | FGD5            | 0.66<br>2 | 1.58 | 2.78E-05 | 2.60E-04 |
| 228184_at   | DISP1           | 0.66<br>1 | 1.58 | 2.41E-07 | 5.85E-06 |
| 204154_at   | CDO1            | 0.66<br>1 | 1.58 | 1.67E-02 | 4.33E-02 |
| 220178_at   | MFSD12          | 0.66<br>1 | 1.58 | 2.95E-04 | 1.72E-03 |
| 222803_at   | PRTFDC1         | 0.66<br>1 | 1.58 | 4.60E-05 | 3.88E-04 |
| 231947_at   | MYCT1           | 0.66<br>1 | 1.58 | 2.48E-05 | 2.38E-04 |
| 223748_at   | SLC4A11         | 0.66      | 1.58 | 1.69E-05 | 1.74E-04 |
| 223859_at   | EPB41L4B        | 0.66      | 1.58 | 4.86E-03 | 1.61E-02 |
| 204014_at   | DUSP4           | 0.66      | 1.58 | 8.60E-04 | 3.99E-03 |
| 235597_s_at | RGPD1 /// RGPD2 | 0.66      | 1.58 | 1.14E-02 | 3.18E-02 |
| 230908_at   | TACR1           | 0.66      | 1.58 | 1.46E-05 | 1.54E-04 |
| 243531_at   | ORAOV1          | 0.66      | 1.58 | 4.94E-05 | 4.11E-04 |
| 211126_s_at | CSRP2           | 0.66      | 1.58 | 2.79E-05 | 2.61E-04 |
| 209123_at   | QDPR            | 0.65<br>9 | 1.58 | 2.75E-10 | 2.39E-08 |
| 218692_at   | SYBU            | 0.65<br>9 | 1.58 | 4.61E-06 | 6.15E-05 |
| 234436_x_at | OBP2A           | 0.65<br>9 | 1.58 | 1.41E-05 | 1.50E-04 |
| 204629_at   | PARVB           | 0.65<br>9 | 1.58 | 2.61E-04 | 1.56E-03 |
| 228113_at   | RAB37           | 0.65<br>9 | 1.58 | 5.36E-04 | 2.75E-03 |
| 1569788_at  | ST8SIA1         | 0.65<br>9 | 1.58 | 2.48E-03 | 9.32E-03 |
| 232284_at   | PSMD6-AS2       | 0.65<br>9 | 1.58 | 3.77E-04 | 2.08E-03 |
| 222857_s_at | KCNMB4          | 0.65<br>9 | 1.58 | 7.98E-06 | 9.51E-05 |
| 206772_at   | PTH2R           | 0.65<br>8 | 1.58 | 7.00E-04 | 3.40E-03 |
| 203936_s_at | MMP9            | 0.65<br>8 | 1.58 | 8.50E-04 | 3.96E-03 |
| 230836_at   | ST8SIA4         | 0.65<br>8 | 1.58 | 3.39E-05 | 3.03E-04 |
| 244360_at   | FBXL17          | 0.65<br>8 | 1.58 | 3.66E-07 | 8.05E-06 |
| 213185_at   | KIAA0556        | 0.65<br>7 | 1.58 | 9.23E-07 | 1.67E-05 |
| 214033_at   | ABCC6           | 0.65<br>7 | 1.58 | 4.84E-04 | 2.54E-03 |
| 204437_s_at | FOLR1           | 0.65<br>7 | 1.58 | 1.80E-03 | 7.22E-03 |
| 228831_s_at | GNG7            | 0.65<br>7 | 1.58 | 6.90E-07 | 1.33E-05 |
| 210029_at   | IDO1            | 0.65<br>7 | 1.58 | 4.60E-07 | 9.57E-06 |
| 1558177_at  | TMEM229B        | 0.65<br>6 | 1.58 | 7.44E-07 | 1.41E-05 |
| 205226_at   | PDGFRL          | 0.65<br>6 | 1.58 | 5.68E-04 | 2.88E-03 |

|              |                                               |           |      |          |          |
|--------------|-----------------------------------------------|-----------|------|----------|----------|
| 211795_s_at  | FYB                                           | 0.65<br>5 | 1.57 | 1.31E-04 | 9.07E-04 |
| 207354_at    | CCL16                                         | 0.65<br>5 | 1.57 | 4.89E-07 | 1.00E-05 |
| 33197_at     | MYO7A                                         | 0.65<br>5 | 1.57 | 7.41E-05 | 5.68E-04 |
| 235256_s_at  | GALM                                          | 0.65<br>5 | 1.57 | 8.74E-06 | 1.02E-04 |
| 203730_s_at  | ZKSCAN5                                       | 0.65<br>5 | 1.57 | 1.32E-05 | 1.42E-04 |
| 235368_at    | ADAMTS5                                       | 0.65<br>5 | 1.57 | 4.77E-05 | 4.00E-04 |
| 218272_at    | TTC38                                         | 0.65<br>5 | 1.57 | 1.18E-04 | 8.28E-04 |
| 1558827_a_at | ZNF831                                        | 0.65<br>5 | 1.57 | 1.62E-03 | 6.61E-03 |
| 211324_s_at  | RGPD3 /// RGPD4 /// RGPD5 /// RGPD6 /// RGPD8 | 0.65<br>5 | 1.57 | 2.21E-03 | 8.52E-03 |
| 1556199_a_at | RGS9BP                                        | 0.65<br>4 | 1.57 | 1.07E-03 | 4.77E-03 |
| 206373_at    | ZIC1                                          | 0.65<br>4 | 1.57 | 5.50E-06 | 7.06E-05 |
| 227935_s_at  | PCGF5                                         | 0.65<br>4 | 1.57 | 5.75E-06 | 7.32E-05 |
| 230980_x_at  | MIR142                                        | 0.65<br>4 | 1.57 | 2.45E-05 | 2.36E-04 |
| 204890_s_at  | LCK                                           | 0.65<br>4 | 1.57 | 8.01E-06 | 9.53E-05 |
| 223663_at    | CCDC88B                                       | 0.65<br>4 | 1.57 | 1.52E-06 | 2.51E-05 |
| 212358_at    | CLIP3                                         | 0.65<br>4 | 1.57 | 1.51E-05 | 1.59E-04 |
| 217276_x_at  | SERHL2                                        | 0.65<br>4 | 1.57 | 2.95E-03 | 1.08E-02 |
| 1569225_a_at | SCML4                                         | 0.65<br>4 | 1.57 | 1.72E-04 | 1.12E-03 |
| 205841_at    | JAK2                                          | 0.65<br>3 | 1.57 | 4.45E-05 | 3.78E-04 |
| 235496_at    | HRCT1                                         | 0.65<br>3 | 1.57 | 4.41E-04 | 2.36E-03 |
| 1560434_x_at | CLTA                                          | 0.65<br>3 | 1.57 | 7.49E-05 | 5.73E-04 |
| 229233_at    | NRG3                                          | 0.65<br>3 | 1.57 | 1.12E-06 | 1.96E-05 |
| 203710_at    | ITPR1                                         | 0.65<br>3 | 1.57 | 4.01E-07 | 8.60E-06 |
| 218579_s_at  | DHX35                                         | 0.65<br>3 | 1.57 | 1.42E-07 | 3.86E-06 |
| 224339_s_at  | ANGPTL1                                       | 0.65<br>3 | 1.57 | 3.46E-05 | 3.08E-04 |
| 201704_at    | ENTPD6                                        | 0.65<br>3 | 1.57 | 2.52E-05 | 2.41E-04 |
| 206695_x_at  | ZNF43                                         | 0.65<br>3 | 1.57 | 1.25E-05 | 1.36E-04 |
| 219734_at    | SIDT1                                         | 0.65<br>3 | 1.57 | 5.22E-05 | 4.30E-04 |
| 242625_at    | RSAD2                                         | 0.65<br>2 | 1.57 | 2.53E-04 | 1.52E-03 |
| 223253_at    | EPDR1                                         | 0.65<br>2 | 1.57 | 3.13E-03 | 1.13E-02 |
| 209381_x_at  | SF3A2                                         | 0.65<br>2 | 1.57 | 6.49E-05 | 5.10E-04 |
| 1559072_a_at | ELFN2                                         | 0.65<br>2 | 1.57 | 3.56E-07 | 7.87E-06 |
| 211663_x_at  | PTGDS                                         | 0.65<br>1 | 1.57 | 6.17E-06 | 7.72E-05 |

|             |              |      |      |          |          |          |
|-------------|--------------|------|------|----------|----------|----------|
| 219136_s_at | LMF1         | 0.65 | 1    | 1.57     | 2.61E-04 | 1.56E-03 |
| 229169_at   | TTC18        | 0.65 | 1.57 | 2.06E-04 | 1.29E-03 |          |
| 242674_at   | EIF4E        | 0.65 | 1.57 | 1.14E-04 | 8.05E-04 |          |
| 227626_at   | PAQR8        | 0.65 | 1.57 | 2.92E-05 | 2.70E-04 |          |
| 229426_at   | COX5A        | 0.65 | 1.57 | 5.94E-06 | 7.51E-05 |          |
| 225025_at   | IGSF8        | 0.65 | 1.57 | 9.51E-08 | 2.78E-06 |          |
| 209960_at   | HGF          | 0.65 | 1.57 | 3.53E-03 | 1.24E-02 |          |
| 227591_at   | SH3BP5-AS1   | 0.64 | 9    | 1.57     | 6.90E-06 | 8.43E-05 |
| 213464_at   | SHC2         | 0.64 | 9    | 1.57     | 5.14E-05 | 4.24E-04 |
| 223840_s_at | SPATA9       | 0.64 | 9    | 1.57     | 7.56E-05 | 5.78E-04 |
| 206150_at   | CD27         | 0.64 | 8    | 1.57     | 1.31E-05 | 1.41E-04 |
| 228194_s_at | SORCS1       | 0.64 | 8    | 1.57     | 3.59E-07 | 7.93E-06 |
| 238333_s_at | PAOX         | 0.64 | 8    | 1.57     | 1.05E-02 | 2.99E-02 |
| 228658_at   | MIAT         | 0.64 | 8    | 1.57     | 1.34E-03 | 5.70E-03 |
| 205453_at   | HOXB2        | 0.64 | 8    | 1.57     | 4.45E-04 | 2.38E-03 |
| 224929_at   | TMEM173      | 0.64 | 8    | 1.57     | 9.25E-07 | 1.68E-05 |
| 229039_at   | SYN2         | 0.64 | 7    | 1.57     | 1.65E-03 | 6.71E-03 |
| 232643_at   | POLR2F       | 0.64 | 7    | 1.57     | 5.08E-06 | 6.64E-05 |
| 209525_at   | HDGFRP3      | 0.64 | 7    | 1.57     | 3.73E-06 | 5.17E-05 |
| 205718_at   | ITGB7        | 0.64 | 7    | 1.57     | 4.17E-07 | 8.86E-06 |
| 228956_at   | UGT8         | 0.64 | 7    | 1.57     | 1.27E-03 | 5.48E-03 |
| 219921_s_at | DOCK5        | 0.64 | 6    | 1.56     | 1.18E-08 | 5.16E-07 |
| 227894_at   | WDR90        | 0.64 | 6    | 1.56     | 2.63E-05 | 2.49E-04 |
| 205511_at   | FLJ10038     | 0.64 | 6    | 1.56     | 9.02E-05 | 6.67E-04 |
| 212890_at   | SLC38A10     | 0.64 | 6    | 1.56     | 1.27E-04 | 8.82E-04 |
| 1557895_at  | FLJ35934     | 0.64 | 6    | 1.56     | 2.37E-04 | 1.45E-03 |
| 1553734_at  | AK7          | 0.64 | 6    | 1.56     | 3.75E-05 | 3.30E-04 |
| 1556736_at  | LOC100129858 | 0.64 | 5    | 1.56     | 5.46E-05 | 4.45E-04 |
| 211766_s_at | PNLIPRP2     | 0.64 | 5    | 1.56     | 2.64E-03 | 9.84E-03 |
| 235627_at   | PFN4         | 0.64 | 5    | 1.56     | 1.19E-03 | 5.19E-03 |
| 239805_at   | SLC13A2      | 0.64 | 4    | 1.56     | 2.38E-03 | 9.03E-03 |
| 242269_at   | FLJ42875     | 0.64 | 4    | 1.56     | 1.23E-06 | 2.13E-05 |
| 221207_s_at | NBEA         | 0.64 | 4    | 1.56     | 3.40E-04 | 1.92E-03 |
| 206932_at   | CH25H        | 0.64 | 4    | 1.56     | 3.35E-03 | 1.19E-02 |
| 225168_at   | FRMD4A       | 0.64 | 4    | 1.56     | 2.34E-07 | 5.71E-06 |

|             |                         |           |      |          |          |
|-------------|-------------------------|-----------|------|----------|----------|
| 216350_s_at | ZNF10                   | 0.64<br>4 | 1.56 | 1.26E-04 | 8.77E-04 |
| 1561336_at  | DNASE1L3                | 0.64<br>3 | 1.56 | 5.24E-03 | 1.71E-02 |
| 236401_at   | GIMAP1                  | 0.64<br>3 | 1.56 | 1.15E-05 | 1.28E-04 |
| 236222_at   | MAATS1                  | 0.64<br>3 | 1.56 | 2.02E-04 | 1.27E-03 |
| 206685_at   | HCG4                    | 0.64<br>3 | 1.56 | 4.83E-03 | 1.60E-02 |
| 213488_at   | SNED1                   | 0.64<br>3 | 1.56 | 5.33E-06 | 6.89E-05 |
| 230869_at   | FAM155A                 | 0.64<br>3 | 1.56 | 5.79E-03 | 1.86E-02 |
| 235885_at   | P2RY12                  | 0.64<br>3 | 1.56 | 9.29E-06 | 1.08E-04 |
| 227944_at   | PTPN3                   | 0.64<br>2 | 1.56 | 3.42E-07 | 7.61E-06 |
| 210401_at   | P2RX1                   | 0.64<br>2 | 1.56 | 6.37E-05 | 5.03E-04 |
| 232155_at   | RNF213                  | 0.64<br>2 | 1.56 | 1.86E-04 | 1.19E-03 |
| 206819_at   | LOC727983 /// POM121L9P | 0.64<br>2 | 1.56 | 8.03E-03 | 2.41E-02 |
| 206844_at   | FBP2                    | 0.64<br>2 | 1.56 | 7.99E-03 | 2.40E-02 |
| 232676_x_at | MYEF2                   | 0.64<br>2 | 1.56 | 7.65E-06 | 9.18E-05 |
| 227285_at   | C1orf51                 | 0.64<br>2 | 1.56 | 8.47E-04 | 3.95E-03 |
| 241694_at   | PKHD1                   | 0.64<br>2 | 1.56 | 8.09E-04 | 3.80E-03 |
| 243456_at   | ZNF214                  | 0.64<br>2 | 1.56 | 1.25E-03 | 5.43E-03 |
| 218986_s_at | DDX60                   | 0.64<br>2 | 1.56 | 4.89E-08 | 1.64E-06 |
| 228863_at   | PCDH17                  | 0.64<br>2 | 1.56 | 3.26E-03 | 1.17E-02 |
| 229947_at   | PI15                    | 0.64<br>2 | 1.56 | 2.59E-04 | 1.55E-03 |
| 226735_at   | TAPT1                   | 0.64<br>2 | 1.56 | 1.72E-08 | 6.98E-07 |
| 218870_at   | ARHGAP15                | 0.64<br>1 | 1.56 | 5.34E-05 | 4.37E-04 |
| 213010_at   | PRKCDBP                 | 0.64<br>1 | 1.56 | 1.67E-04 | 1.10E-03 |
| 227596_at   | FLJ37453                | 0.64<br>1 | 1.56 | 9.73E-09 | 4.42E-07 |
| 242247_at   | METTL15                 | 0.64<br>1 | 1.56 | 3.52E-06 | 4.95E-05 |
| 209505_at   | NR2F1                   | 0.64<br>1 | 1.56 | 3.59E-04 | 2.00E-03 |
| 209871_s_at | APBA2                   | 0.64<br>1 | 1.56 | 2.51E-05 | 2.40E-04 |
| 220371_s_at | SLC12A9                 | 0.64      | 1.56 | 2.79E-06 | 4.11E-05 |
| 236430_at   | TMED6                   | 0.64      | 1.56 | 1.56E-03 | 6.44E-03 |
| 227657_at   | RNF150                  | 0.64      | 1.56 | 2.69E-03 | 9.99E-03 |
| 202202_s_at | LAMA4                   | 0.64      | 1.56 | 4.43E-06 | 5.95E-05 |
| 202847_at   | PCK2                    | 0.64      | 1.56 | 2.35E-04 | 1.44E-03 |
| 241607_at   | LOC730102               | 0.64      | 1.56 | 4.73E-06 | 6.27E-05 |
| 220114_s_at | STAB2                   | 0.64      | 1.56 | 4.55E-05 | 3.85E-04 |
| 231283_at   | MGAT4A                  | 0.64      | 1.56 | 5.49E-04 | 2.81E-03 |

|              |                             |      |      |          |          |
|--------------|-----------------------------|------|------|----------|----------|
| 1557161_at   | LOC100132735                | 0.64 | 1.56 | 7.33E-03 | 2.24E-02 |
| 209166_s_at  | MAN2B1                      | 0.64 | 1.56 | 1.44E-06 | 2.42E-05 |
| 205013_s_at  | ADORA2A /// SPECC1L-ADORA2A | 0.64 | 1.56 | 4.26E-08 | 1.46E-06 |
| 229802_at    | WISP1                       | 0.63 | 9    | 1.56     | 1.53E-03 |
| 237745_at    | TSC22D1-AS1                 | 0.63 | 9    | 1.56     | 1.54E-04 |
| 1553037_a_at | SYN2                        | 0.63 | 9    | 1.56     | 3.31E-04 |
| 235279_at    | PARVA                       | 0.63 | 9    | 1.56     | 1.24E-05 |
| 205944_s_at  | CLTCL1                      | 0.63 | 9    | 1.56     | 1.95E-07 |
| 228384_s_at  | PYROXD2                     | 0.63 | 8    | 1.56     | 1.27E-03 |
| 223608_at    | EFCAB2                      | 0.63 | 8    | 1.56     | 1.31E-04 |
| 213900_at    | FAM189A2                    | 0.63 | 8    | 1.56     | 1.63E-03 |
| 236644_at    | RNF180                      | 0.63 | 8    | 1.56     | 3.72E-04 |
| 203040_s_at  | HMBS                        | 0.63 | 8    | 1.56     | 9.51E-04 |
| 228305_at    | ZNF565                      | 0.63 | 8    | 1.56     | 4.08E-06 |
| 210549_s_at  | CCL23                       | 0.63 | 7    | 1.56     | 5.54E-03 |
| 237408_at    | DCUN1D1                     | 0.63 | 7    | 1.56     | 6.17E-05 |
| 205380_at    | PDZK1                       | 0.63 | 7    | 1.56     | 1.43E-03 |
| 242470_at    | EID2B                       | 0.63 | 7    | 1.56     | 1.58E-05 |
| 228082_at    | CLMP                        | 0.63 | 7    | 1.55     | 1.52E-02 |
| 210653_s_at  | BCKDHB                      | 0.63 | 7    | 1.55     | 5.65E-03 |
| 206125_s_at  | KLK8                        | 0.63 | 7    | 1.55     | 1.84E-02 |
| 219161_s_at  | CKLF /// CKLF-CMTM1         | 0.63 | 6    | 1.55     | 6.93E-06 |
| 209799_at    | PRKAA1                      | 0.63 | 6    | 1.55     | 1.57E-09 |
| 204788_s_at  | PPOX                        | 0.63 | 6    | 1.55     | 3.79E-07 |
| 229308_at    | ANKRD29                     | 0.63 | 6    | 1.55     | 8.67E-03 |
| 219587_at    | TTC12                       | 0.63 | 6    | 1.55     | 6.59E-06 |
| 1553612_at   | ZNF354B                     | 0.63 | 5    | 1.55     | 2.09E-03 |
| 214313_s_at  | EIF5B                       | 0.63 | 5    | 1.55     | 6.98E-04 |
| 219700_at    | PLXDC1                      | 0.63 | 5    | 1.55     | 4.24E-05 |
| 233540_s_at  | CDK5RAP2                    | 0.63 | 5    | 1.55     | 8.51E-06 |
| 209858_x_at  | MPPE1                       | 0.63 | 5    | 1.55     | 1.61E-06 |
| 230536_at    | PBX4                        | 0.63 | 5    | 1.55     | 1.53E-06 |
| 215108_x_at  | TOX3                        | 0.63 | 5    | 1.55     | 6.40E-03 |
| 227649_s_at  | SRGAP2 /// SRGAP2D          | 0.63 | 4    | 1.55     | 4.63E-06 |

|             |                                             |           |      |          |          |
|-------------|---------------------------------------------|-----------|------|----------|----------|
| 219728_at   | MYOT                                        | 0.63<br>4 | 1.55 | 2.08E-03 | 8.12E-03 |
| 228341_at   | NUDT16                                      | 0.63<br>4 | 1.55 | 4.37E-06 | 5.90E-05 |
| 235930_at   | KCNMB4                                      | 0.63<br>4 | 1.55 | 1.54E-06 | 2.55E-05 |
| 243843_at   | N4BP2L1                                     | 0.63<br>4 | 1.55 | 3.29E-04 | 1.87E-03 |
| 218601_at   | URGCP                                       | 0.63<br>4 | 1.55 | 6.18E-05 | 4.90E-04 |
| 202104_s_at | SPG7                                        | 0.63<br>4 | 1.55 | 1.08E-06 | 1.90E-05 |
| 238924_at   | BMS1P1 /// BMS1P5 /// LOC100996797          | 0.63<br>4 | 1.55 | 3.07E-04 | 1.77E-03 |
| 236347_at   | MMAA                                        | 0.63<br>3 | 1.55 | 4.73E-06 | 6.27E-05 |
| 212681_at   | EPB41L3                                     | 0.63<br>3 | 1.55 | 1.48E-07 | 3.99E-06 |
| 205908_s_at | OMD                                         | 0.63<br>3 | 1.55 | 2.47E-04 | 1.49E-03 |
| 230822_at   | TMEM61                                      | 0.63<br>3 | 1.55 | 1.14E-03 | 5.02E-03 |
| 221042_s_at | CLMN                                        | 0.63<br>3 | 1.55 | 3.84E-04 | 2.11E-03 |
| 230436_s_at | CENPV                                       | 0.63<br>3 | 1.55 | 8.37E-06 | 9.88E-05 |
| 212780_at   | SOS1                                        | 0.63<br>3 | 1.55 | 5.54E-06 | 7.10E-05 |
| 218211_s_at | MLPH                                        | 0.63<br>2 | 1.55 | 3.09E-05 | 2.82E-04 |
| 238670_at   | RAD18                                       | 0.63<br>2 | 1.55 | 6.36E-08 | 2.05E-06 |
| 236817_at   | ADAT2                                       | 0.63<br>2 | 1.55 | 8.11E-05 | 6.13E-04 |
| 213471_at   | NPHP4                                       | 0.63<br>2 | 1.55 | 1.36E-06 | 2.31E-05 |
| 1554628_at  | ZNF57                                       | 0.63<br>2 | 1.55 | 2.98E-06 | 4.35E-05 |
| 64064_at    | GIMAP1-GIMAP5 /// GIMAP5                    | 0.63<br>2 | 1.55 | 2.53E-04 | 1.52E-03 |
| 219692_at   | KREMEN2                                     | 0.63<br>2 | 1.55 | 4.86E-06 | 6.41E-05 |
| 244313_at   | CR1                                         | 0.63<br>1 | 1.55 | 4.10E-04 | 2.23E-03 |
| 229062_at   | ARL9                                        | 0.63<br>1 | 1.55 | 2.32E-08 | 9.05E-07 |
| 219667_s_at | BANK1                                       | 0.63<br>1 | 1.55 | 9.96E-03 | 2.86E-02 |
| 229696_at   | FECH                                        | 0.63<br>1 | 1.55 | 1.10E-04 | 7.82E-04 |
| 215764_x_at | AP2A2                                       | 0.63<br>1 | 1.55 | 2.29E-07 | 5.63E-06 |
| 237493_at   | IL22RA2                                     | 0.63<br>1 | 1.55 | 2.96E-06 | 4.32E-05 |
| 1559021_at  | C3orf52                                     | 0.63<br>1 | 1.55 | 8.28E-04 | 3.88E-03 |
| 235981_at   | C8orf22                                     | 0.63      | 1.55 | 1.90E-03 | 7.53E-03 |
| 229975_at   | BMPRI1B                                     | 0.63      | 1.55 | 4.16E-03 | 1.42E-02 |
| 1553392_at  | EFCAB3                                      | 0.63      | 1.55 | 1.33E-03 | 5.69E-03 |
| 205114_s_at | CCL3 /// CCL3L1 /// CCL3L3 /// LOC101060267 | 0.63      | 1.55 | 1.19E-03 | 5.21E-03 |
| 204103_at   | CCL4                                        | 0.63      | 1.55 | 1.20E-05 | 1.32E-04 |
| 219131_at   | UBIAD1                                      | 0.63      | 1.55 | 1.19E-02 | 3.30E-02 |
| 228952_at   | ENPP1                                       | 0.63      | 1.55 | 1.40E-06 | 2.36E-05 |



|             |                                                                         |           |      |          |          |
|-------------|-------------------------------------------------------------------------|-----------|------|----------|----------|
| 212705_x_at | PNPLA2                                                                  | 0.62<br>9 | 1.55 | 3.39E-05 | 3.03E-04 |
| 50221_at    | TFEB                                                                    | 0.62<br>9 | 1.55 | 1.41E-07 | 3.83E-06 |
| 226096_at   | FNDC5                                                                   | 0.62<br>9 | 1.55 | 3.36E-04 | 1.90E-03 |
| 235911_at   | MFI2                                                                    | 0.62<br>9 | 1.55 | 6.58E-03 | 2.05E-02 |
| 40020_at    | CELSR3                                                                  | 0.62<br>9 | 1.55 | 1.44E-06 | 2.42E-05 |
| 236083_at   | BCL2L15                                                                 | 0.62<br>9 | 1.55 | 3.13E-05 | 2.85E-04 |
| 210356_x_at | MS4A1                                                                   | 0.62<br>9 | 1.55 | 5.62E-03 | 1.81E-02 |
| 210542_s_at | SLCO3A1                                                                 | 0.62<br>9 | 1.55 | 1.73E-05 | 1.78E-04 |
| 214060_at   | SSBP1                                                                   | 0.62<br>9 | 1.55 | 3.28E-05 | 2.95E-04 |
| 216623_x_at | TOX3                                                                    | 0.62<br>9 | 1.55 | 8.06E-03 | 2.42E-02 |
| 239579_at   | EPHX4                                                                   | 0.62<br>9 | 1.55 | 5.14E-04 | 2.66E-03 |
| 227807_at   | PARP9                                                                   | 0.62<br>8 | 1.55 | 3.07E-07 | 7.07E-06 |
| 214344_at   | LINC00950                                                               | 0.62<br>8 | 1.55 | 5.97E-07 | 1.17E-05 |
| 227543_at   | RNASEH2C                                                                | 0.62<br>8 | 1.55 | 6.24E-03 | 1.97E-02 |
| 228395_at   | GNL3                                                                    | 0.62<br>8 | 1.55 | 8.24E-07 | 1.53E-05 |
| 228555_at   | CAMK2D                                                                  | 0.62<br>8 | 1.55 | 1.79E-08 | 7.24E-07 |
| 231263_at   | ARMC12                                                                  | 0.62<br>8 | 1.55 | 1.47E-06 | 2.45E-05 |
| 232533_at   | METTL8                                                                  | 0.62<br>8 | 1.55 | 8.90E-06 | 1.04E-04 |
| 227716_at   | UBXN11                                                                  | 0.62<br>7 | 1.54 | 9.84E-04 | 4.47E-03 |
| 225067_at   | ULK3                                                                    | 0.62<br>7 | 1.54 | 1.30E-06 | 2.22E-05 |
| 203260_at   | HDDC2                                                                   | 0.62<br>7 | 1.54 | 5.86E-03 | 1.87E-02 |
| 229071_at   | C17orf100                                                               | 0.62<br>7 | 1.54 | 2.98E-04 | 1.73E-03 |
| 207338_s_at | ZNF200                                                                  | 0.62<br>7 | 1.54 | 9.76E-05 | 7.09E-04 |
| 215193_x_at | HLA-DRB1 /// HLA-DRB3 /// HLA-DRB4 /// LOC100507709<br>/// LOC100507714 | 0.62<br>7 | 1.54 | 1.29E-05 | 1.40E-04 |
| 227109_at   | CYP2R1                                                                  | 0.62<br>7 | 1.54 | 4.49E-10 | 3.61E-08 |
| 213419_at   | APBB2                                                                   | 0.62<br>7 | 1.54 | 9.95E-09 | 4.49E-07 |
| 207113_s_at | TNF                                                                     | 0.62<br>7 | 1.54 | 1.92E-05 | 1.94E-04 |
| 227594_at   | ZMYM6                                                                   | 0.62<br>6 | 1.54 | 2.79E-07 | 6.55E-06 |
| 207961_x_at | MYH11                                                                   | 0.62<br>6 | 1.54 | 5.11E-03 | 1.68E-02 |
| 206837_at   | ALX1                                                                    | 0.62<br>6 | 1.54 | 5.58E-05 | 4.53E-04 |
| 222868_s_at | IL18BP                                                                  | 0.62<br>5 | 1.54 | 2.18E-07 | 5.42E-06 |
| 214572_s_at | INSL3                                                                   | 0.62<br>5 | 1.54 | 4.50E-05 | 3.82E-04 |
| 1570505_at  | ABCB4                                                                   | 0.62<br>5 | 1.54 | 1.41E-05 | 1.50E-04 |

|              | HLA-DRB1 /// HLA-DRB4 /// HLA-DRB5 /// LOC100507709<br>/// LOC100507714 | 0.62 |      |          |          |
|--------------|-------------------------------------------------------------------------|------|------|----------|----------|
| 209312_x_at  |                                                                         | 5    | 1.54 | 7.97E-06 | 9.50E-05 |
|              |                                                                         | 0.62 |      |          |          |
| 230440_at    | ZNF469                                                                  | 5    | 1.54 | 1.66E-05 | 1.72E-04 |
|              |                                                                         | 0.62 |      |          |          |
| 210847_x_at  | TNFRSF25                                                                | 5    | 1.54 | 1.05E-05 | 1.19E-04 |
|              |                                                                         | 0.62 |      |          |          |
| 1556062_at   | RPP30                                                                   | 5    | 1.54 | 4.29E-06 | 5.81E-05 |
|              |                                                                         | 0.62 |      |          |          |
| 207075_at    | NLRP3                                                                   | 5    | 1.54 | 2.10E-05 | 2.08E-04 |
|              |                                                                         | 0.62 |      |          |          |
| 227243_s_at  | EBF3                                                                    | 5    | 1.54 | 4.40E-04 | 2.36E-03 |
|              |                                                                         | 0.62 |      |          |          |
| 212829_at    | PIP4K2A                                                                 | 5    | 1.54 | 1.01E-10 | 1.03E-08 |
|              |                                                                         | 0.62 |      |          |          |
| 214438_at    | HLX                                                                     | 4    | 1.54 | 2.53E-08 | 9.72E-07 |
|              |                                                                         | 0.62 |      |          |          |
| 210175_at    | GCFC2                                                                   | 4    | 1.54 | 2.52E-04 | 1.52E-03 |
|              |                                                                         | 0.62 |      |          |          |
| 227526_at    | CDON                                                                    | 4    | 1.54 | 3.19E-04 | 1.83E-03 |
|              |                                                                         | 0.62 |      |          |          |
| 217735_s_at  | EIF2AK1                                                                 | 3    | 1.54 | 7.55E-04 | 3.60E-03 |
|              |                                                                         | 0.62 |      |          |          |
| 1552301_a_at | CORO6                                                                   | 3    | 1.54 | 1.10E-03 | 4.87E-03 |
|              |                                                                         | 0.62 |      |          |          |
| 212580_at    | CAST                                                                    | 3    | 1.54 | 5.21E-04 | 2.68E-03 |
|              |                                                                         | 0.62 |      |          |          |
| 204296_at    | DCTN1                                                                   | 3    | 1.54 | 2.78E-06 | 4.11E-05 |
|              |                                                                         | 0.62 |      |          |          |
| 63305_at     | PKNOX2                                                                  | 3    | 1.54 | 5.24E-07 | 1.06E-05 |
|              |                                                                         | 0.62 |      |          |          |
| 202661_at    | ITPR2                                                                   | 2    | 1.54 | 1.98E-05 | 1.99E-04 |
|              |                                                                         | 0.62 |      |          |          |
| 206197_at    | NME5                                                                    | 2    | 1.54 | 9.16E-06 | 1.06E-04 |
|              |                                                                         | 0.62 |      |          |          |
| 235353_at    | SEL1L3                                                                  | 2    | 1.54 | 2.39E-04 | 1.46E-03 |
|              |                                                                         | 0.62 |      |          |          |
| 227572_at    | USP30                                                                   | 2    | 1.54 | 7.40E-10 | 5.43E-08 |
|              |                                                                         | 0.62 |      |          |          |
| 227396_at    | PTPRJ                                                                   | 2    | 1.54 | 2.86E-05 | 2.65E-04 |
|              |                                                                         | 0.62 |      |          |          |
| 241450_at    | RSPO1                                                                   | 2    | 1.54 | 8.18E-04 | 3.84E-03 |
|              |                                                                         | 0.62 |      |          |          |
| 229086_at    | C1orf213                                                                | 2    | 1.54 | 3.23E-06 | 4.63E-05 |
|              |                                                                         | 0.62 |      |          |          |
| 238615_at    | ERLIN2                                                                  | 1    | 1.54 | 4.70E-05 | 3.95E-04 |
|              |                                                                         | 0.62 |      |          |          |
| 230744_at    | FSTL1                                                                   | 1    | 1.54 | 1.11E-02 | 3.11E-02 |
|              |                                                                         | 0.62 |      |          |          |
| 233202_at    | CNTNAP3                                                                 | 1    | 1.54 | 1.14E-04 | 8.05E-04 |
|              |                                                                         | 0.62 |      |          |          |
| 212757_s_at  | CAMK2G                                                                  | 1    | 1.54 | 3.10E-08 | 1.15E-06 |
|              |                                                                         | 0.62 |      |          |          |
| 235238_at    | SHC4                                                                    | 1    | 1.54 | 1.02E-03 | 4.60E-03 |
|              |                                                                         | 0.62 |      |          |          |
| 223126_s_at  | C1orf21                                                                 | 1    | 1.54 | 1.13E-06 | 1.97E-05 |
|              |                                                                         | 0.62 |      |          |          |
| 236609_at    | PMS1                                                                    | 1    | 1.54 | 1.10E-03 | 4.90E-03 |
|              |                                                                         | 0.62 |      |          |          |
| 219759_at    | ERAP2                                                                   | 1    | 1.54 | 5.45E-03 | 1.77E-02 |
|              |                                                                         | 0.62 |      |          |          |
| 214058_at    | MYCL1                                                                   | 1    | 1.54 | 1.19E-03 | 5.21E-03 |
|              |                                                                         | 0.62 |      |          |          |
| 227030_at    | IKZF3                                                                   | 1    | 1.54 | 2.83E-06 | 4.16E-05 |
|              |                                                                         | 0.62 |      |          |          |
| 227234_at    | LOC100132815                                                            | 1    | 1.54 | 4.68E-04 | 2.48E-03 |
|              |                                                                         | 0.62 |      |          |          |
| 213248_at    | LOC730101                                                               | 1    | 1.54 | 3.86E-06 | 5.33E-05 |
|              |                                                                         | 0.62 |      |          |          |
| 232604_at    | ZNF541                                                                  | 1    | 1.54 | 1.06E-04 | 7.63E-04 |

|              |               |      |      |          |          |
|--------------|---------------|------|------|----------|----------|
| 220468_at    | ARL14         | 0.62 | 1.54 | 3.40E-05 | 3.04E-04 |
| 1557639_at   | NFIA          | 0.61 | 9    | 1.54     | 3.12E-04 |
| 231766_s_at  | COL12A1       | 0.61 | 9    | 1.54     | 9.31E-03 |
| 210314_x_at  | TNFSF13       | 0.61 | 9    | 1.54     | 3.72E-04 |
| 203914_x_at  | HPGD          | 0.61 | 9    | 1.54     | 6.65E-07 |
| 207240_s_at  | LHCGR         | 0.61 | 9    | 1.54     | 5.81E-04 |
| 219457_s_at  | RIN3          | 0.61 | 8    | 1.54     | 2.93E-06 |
| 204972_at    | OAS2          | 0.61 | 8    | 1.53     | 2.45E-03 |
| 223322_at    | RASSF5        | 0.61 | 8    | 1.53     | 1.77E-06 |
| 1556755_s_at | LOC286149     | 0.61 | 8    | 1.53     | 6.78E-05 |
| 222920_s_at  | TESPA1        | 0.61 | 8    | 1.53     | 9.68E-05 |
| 225510_at    | OAF           | 0.61 | 8    | 1.53     | 7.18E-06 |
| 207496_at    | MS4A2         | 0.61 | 8    | 1.53     | 1.39E-02 |
| 204562_at    | IRF4          | 0.61 | 8    | 1.53     | 5.14E-05 |
| 237592_at    | ZC2HC1B       | 0.61 | 7    | 1.53     | 1.32E-02 |
| 222941_at    | USP46         | 0.61 | 7    | 1.53     | 4.49E-07 |
| 177_at       | PLD1          | 0.61 | 7    | 1.53     | 5.05E-04 |
| 206983_at    | CCR6          | 0.61 | 7    | 1.53     | 1.69E-03 |
| 238149_at    | ZNF818P       | 0.61 | 7    | 1.53     | 6.82E-04 |
| 209828_s_at  | IL16          | 0.61 | 7    | 1.53     | 9.60E-05 |
| 239548_at    | NEGR1         | 0.61 | 7    | 1.53     | 6.84E-03 |
| 233086_at    | FAM209A       | 0.61 | 6    | 1.53     | 6.13E-07 |
| 204882_at    | ARHGAP25      | 0.61 | 6    | 1.53     | 1.35E-06 |
| 221036_s_at  | APH1B         | 0.61 | 6    | 1.53     | 1.68E-07 |
| 204806_x_at  | HLA-F         | 0.61 | 6    | 1.53     | 2.66E-05 |
| 1553789_a_at | C21orf58      | 0.61 | 6    | 1.53     | 1.23E-04 |
| 219597_s_at  | DUOX1         | 0.61 | 5    | 1.53     | 3.37E-06 |
| 220609_at    | LOC202181     | 0.61 | 5    | 1.53     | 2.82E-05 |
| 235587_at    | LOC202781     | 0.61 | 5    | 1.53     | 2.41E-09 |
| 1558523_at   | FAM184A       | 0.61 | 5    | 1.53     | 1.47E-03 |
| 232832_at    | DKFZp434J0226 | 0.61 | 5    | 1.53     | 2.64E-04 |
| 225386_s_at  | HNRNPLL       | 0.61 | 5    | 1.53     | 1.31E-05 |
| 229656_s_at  | EML6          | 0.61 | 4    | 1.53     | 3.33E-03 |
| 222730_s_at  | ZDHHC2        | 0.61 | 1.53 | 9.62E-03 | 2.78E-02 |

|              |                        |      |      |          |          |
|--------------|------------------------|------|------|----------|----------|
|              |                        | 4    |      |          |          |
|              |                        | 0.61 |      |          |          |
| 219689_at    | SEMA3G                 | 4    | 1.53 | 2.59E-04 | 1.55E-03 |
|              |                        | 0.61 |      |          |          |
| 203305_at    | F13A1                  | 4    | 1.53 | 1.48E-06 | 2.47E-05 |
|              |                        | 0.61 |      |          |          |
| 215427_s_at  | ZCCHC14                | 4    | 1.53 | 6.08E-07 | 1.19E-05 |
|              |                        | 0.61 |      |          |          |
| 202308_at    | SREBF1                 | 4    | 1.53 | 4.21E-05 | 3.62E-04 |
|              |                        | 0.61 |      |          |          |
| 235799_at    | NSL1                   | 4    | 1.53 | 4.90E-07 | 1.00E-05 |
|              |                        | 0.61 |      |          |          |
| 219860_at    | LY6G5C                 | 4    | 1.53 | 1.71E-03 | 6.92E-03 |
|              |                        | 0.61 |      |          |          |
| 218801_at    | UGGT2                  | 4    | 1.53 | 6.77E-05 | 5.28E-04 |
|              |                        | 0.61 |      |          |          |
| 240259_at    | FLRT2 /// LOC100506718 | 4    | 1.53 | 7.72E-05 | 5.89E-04 |
|              |                        | 0.61 |      |          |          |
| 239279_at    | LOC730102              | 3    | 1.53 | 6.01E-06 | 7.58E-05 |
|              |                        | 0.61 |      |          |          |
| 236394_at    | A2MP1                  | 3    | 1.53 | 1.22E-05 | 1.34E-04 |
|              |                        | 0.61 |      |          |          |
| 241399_at    | FAM19A2                | 3    | 1.53 | 2.59E-05 | 2.46E-04 |
|              |                        | 0.61 |      |          |          |
| 229153_at    | SLC7A6OS               | 3    | 1.53 | 3.81E-05 | 3.34E-04 |
|              |                        | 0.61 |      |          |          |
| 206693_at    | IL7                    | 2    | 1.53 | 1.57E-04 | 1.04E-03 |
|              |                        | 0.61 |      |          |          |
| 220023_at    | APOBR                  | 2    | 1.53 | 2.06E-06 | 3.22E-05 |
|              |                        | 0.61 |      |          |          |
| 1552803_a_at | STMN1                  | 2    | 1.53 | 4.26E-03 | 1.45E-02 |
|              |                        | 0.61 |      |          |          |
| 219117_s_at  | FKBP11                 | 2    | 1.53 | 5.44E-06 | 7.01E-05 |
|              |                        | 0.61 |      |          |          |
| 229506_at    | PPM1L                  | 2    | 1.53 | 1.04E-05 | 1.18E-04 |
|              |                        | 0.61 |      |          |          |
| 205678_at    | AP3B2                  | 1    | 1.53 | 3.78E-05 | 3.32E-04 |
|              |                        | 0.61 |      |          |          |
| 204763_s_at  | GNAO1                  | 1    | 1.53 | 3.69E-04 | 2.05E-03 |
|              |                        | 0.61 |      |          |          |
| 219572_at    | CADPS2                 | 1    | 1.53 | 6.73E-06 | 8.26E-05 |
|              |                        | 0.61 |      |          |          |
| 216218_s_at  | PLCL2                  | 1    | 1.53 | 7.11E-06 | 8.64E-05 |
|              |                        | 0.61 |      |          |          |
| 227593_at    | FLJ37453               | 1    | 1.53 | 7.72E-08 | 2.38E-06 |
|              |                        | 0.61 |      |          |          |
| 239282_at    | CCDC41                 | 1    | 1.53 | 7.20E-04 | 3.46E-03 |
|              |                        | 0.61 |      |          |          |
| 214157_at    | GNAS                   | 1    | 1.53 | 6.76E-05 | 5.27E-04 |
|              |                        | 0.61 |      |          |          |
| 218567_x_at  | DPP3                   | 1    | 1.53 | 9.12E-05 | 6.74E-04 |
|              |                        | 0.61 |      |          |          |
| 232663_s_at  | UBAP1L                 | 1    | 1.53 | 5.31E-05 | 4.36E-04 |
|              |                        | 0.61 |      |          |          |
| 218701_at    | LACTB2                 | 1    | 1.53 | 1.66E-05 | 1.72E-04 |
|              |                        | 0.61 |      |          |          |
| 235561_at    | TXNL1                  | 1    | 1.53 | 3.34E-04 | 1.89E-03 |
|              |                        | 0.61 |      |          |          |
| 227236_at    | TSPAN2                 | 1    | 1.53 | 2.51E-03 | 9.43E-03 |
|              |                        | 0.61 |      |          |          |
| 1557567_a_at | LOC100507634           | 1    | 1.53 | 4.28E-04 | 2.31E-03 |
|              |                        | 0.61 |      |          |          |
| 239799_at    | LINC00476              | 1    | 1.53 | 8.67E-03 | 2.56E-02 |
|              |                        | 0.61 |      |          |          |
| 1558345_a_at | LOC439911              | 1    | 1.53 | 1.10E-05 | 1.23E-04 |
|              |                        | 0.61 |      |          |          |
| 214181_x_at  | LST1                   | 1    | 1.53 | 2.58E-05 | 2.45E-04 |
|              |                        | 0.61 |      |          |          |
| 204713_s_at  | F5                     | 1    | 1.53 | 5.70E-03 | 1.83E-02 |

|              |                         |           |      |          |          |
|--------------|-------------------------|-----------|------|----------|----------|
| 239261_s_at  | CORIN                   | 0.60<br>9 | 1.53 | 1.65E-05 | 1.70E-04 |
| 207857_at    | LILRA2                  | 0.60<br>9 | 1.53 | 2.26E-03 | 8.68E-03 |
| 231906_at    | HOXD8                   | 0.60<br>9 | 1.53 | 9.91E-05 | 7.18E-04 |
| 231357_at    | CLEC12B                 | 0.60<br>9 | 1.53 | 1.57E-04 | 1.04E-03 |
| 231582_at    | CDHR3                   | 0.60<br>9 | 1.53 | 1.97E-04 | 1.25E-03 |
| 239353_at    | STK32A                  | 0.60<br>9 | 1.52 | 5.74E-05 | 4.62E-04 |
| 228372_at    | C10orf128               | 0.60<br>8 | 1.52 | 4.83E-05 | 4.04E-04 |
| 230045_at    | CNTN2                   | 0.60<br>8 | 1.52 | 4.74E-06 | 6.28E-05 |
| 207819_s_at  | ABCB4                   | 0.60<br>8 | 1.52 | 6.25E-06 | 7.79E-05 |
| 220979_s_at  | ST6GALNAC5              | 0.60<br>8 | 1.52 | 6.98E-04 | 3.39E-03 |
| 1555759_a_at | CCL5                    | 0.60<br>8 | 1.52 | 1.59E-03 | 6.54E-03 |
| 221013_s_at  | APOL2                   | 0.60<br>8 | 1.52 | 1.22E-05 | 1.34E-04 |
| 219243_at    | GIMAP4                  | 0.60<br>8 | 1.52 | 2.62E-04 | 1.56E-03 |
| 220042_x_at  | HIVEP3                  | 0.60<br>8 | 1.52 | 9.03E-04 | 4.16E-03 |
| 220346_at    | MTHFD2L                 | 0.60<br>7 | 1.52 | 1.04E-03 | 4.67E-03 |
| 202869_at    | OAS1                    | 0.60<br>7 | 1.52 | 1.02E-03 | 4.59E-03 |
| 205470_s_at  | KLK11                   | 0.60<br>7 | 1.52 | 9.97E-06 | 1.14E-04 |
| 207339_s_at  | LTB                     | 0.60<br>7 | 1.52 | 6.73E-06 | 8.26E-05 |
| 229572_at    | ATP6V0A2                | 0.60<br>7 | 1.52 | 2.27E-07 | 5.59E-06 |
| 37586_at     | ZNF142                  | 0.60<br>7 | 1.52 | 1.37E-05 | 1.46E-04 |
| 232605_s_at  | SPG20OS                 | 0.60<br>6 | 1.52 | 1.62E-03 | 6.64E-03 |
| 235969_at    | SCN8A                   | 0.60<br>6 | 1.52 | 5.16E-04 | 2.66E-03 |
| 219583_s_at  | SPATA7                  | 0.60<br>6 | 1.52 | 2.67E-04 | 1.59E-03 |
| 38521_at     | CD22                    | 0.60<br>6 | 1.52 | 1.61E-03 | 6.60E-03 |
| 235884_at    | LOC644794               | 0.60<br>6 | 1.52 | 3.76E-03 | 1.31E-02 |
| 217299_s_at  | NBN                     | 0.60<br>6 | 1.52 | 3.28E-05 | 2.96E-04 |
| 242525_at    | SLC2A5                  | 0.60<br>6 | 1.52 | 1.87E-02 | 4.74E-02 |
| 202912_at    | ADM                     | 0.60<br>6 | 1.52 | 2.35E-05 | 2.29E-04 |
| 204161_s_at  | ENPP4                   | 0.60<br>6 | 1.52 | 1.07E-04 | 7.69E-04 |
| 213249_at    | FBXL7                   | 0.60<br>6 | 1.52 | 8.32E-04 | 3.89E-03 |
| 239949_at    | THNSL2                  | 0.60<br>5 | 1.52 | 1.71E-02 | 4.42E-02 |
| 1556436_at   | EXTL3-AS1               | 0.60<br>5 | 1.52 | 2.20E-03 | 8.48E-03 |
| 206766_at    | ITGA10 /// LOC101060422 | 0.60<br>5 | 1.52 | 6.42E-04 | 3.18E-03 |

|              |                        |           |      |          |          |
|--------------|------------------------|-----------|------|----------|----------|
| 1558217_at   | SLFN13                 | 0.60<br>5 | 1.52 | 1.56E-07 | 4.15E-06 |
| 208894_at    | HLA-DRA                | 0.60<br>5 | 1.52 | 4.94E-03 | 1.63E-02 |
| 213222_at    | PLCB1                  | 0.60<br>5 | 1.52 | 2.36E-04 | 1.44E-03 |
| 239426_at    | SLC2A8                 | 0.60<br>5 | 1.52 | 2.40E-03 | 9.08E-03 |
| 232317_at    | PLXNA4                 | 0.60<br>5 | 1.52 | 1.72E-04 | 1.12E-03 |
| 1558508_a_at | C1orf53                | 0.60<br>5 | 1.52 | 1.12E-04 | 7.98E-04 |
| 1554686_at   | STAU2                  | 0.60<br>5 | 1.52 | 2.20E-04 | 1.37E-03 |
| 202740_at    | ABHD14A-ACY1 /// ACY1  | 0.60<br>4 | 1.52 | 3.08E-04 | 1.78E-03 |
| 209794_at    | SRGAP3                 | 0.60<br>4 | 1.52 | 1.32E-04 | 9.11E-04 |
| 1556001_at   | LOC284939 /// MAPK8IP2 | 0.60<br>4 | 1.52 | 9.38E-08 | 2.75E-06 |
| 230329_s_at  | NUDT6                  | 0.60<br>4 | 1.52 | 1.70E-08 | 6.91E-07 |
| 213664_at    | SLC1A1                 | 0.60<br>4 | 1.52 | 1.54E-04 | 1.03E-03 |
| 244739_at    | RDX                    | 0.60<br>4 | 1.52 | 6.01E-04 | 3.01E-03 |
| 204904_at    | GJA4                   | 0.60<br>3 | 1.52 | 1.57E-04 | 1.04E-03 |
| 39705_at     | SIN3B                  | 0.60<br>3 | 1.52 | 3.10E-04 | 1.79E-03 |
| 209829_at    | FAM65B                 | 0.60<br>3 | 1.52 | 5.34E-05 | 4.37E-04 |
| 221059_s_at  | COTL1                  | 0.60<br>3 | 1.52 | 3.75E-04 | 2.08E-03 |
| 229994_at    | NFIA                   | 0.60<br>3 | 1.52 | 4.40E-08 | 1.50E-06 |
| 230043_at    | MUC20                  | 0.60<br>3 | 1.52 | 1.73E-02 | 4.46E-02 |
| 202659_at    | PSMB10                 | 0.60<br>3 | 1.52 | 4.08E-07 | 8.72E-06 |
| 213906_at    | MYBL1                  | 0.60<br>2 | 1.52 | 1.36E-05 | 1.46E-04 |
| 236562_at    | ZNF439                 | 0.60<br>2 | 1.52 | 5.63E-05 | 4.56E-04 |
| 204661_at    | CD52                   | 0.60<br>2 | 1.52 | 2.94E-03 | 1.08E-02 |
| 230573_at    | SGK2                   | 0.60<br>2 | 1.52 | 6.22E-03 | 1.96E-02 |
| 227397_at    | TPM2                   | 0.60<br>2 | 1.52 | 7.51E-03 | 2.29E-02 |
| 218430_s_at  | RFX7                   | 0.60<br>2 | 1.52 | 7.65E-04 | 3.64E-03 |
| 219007_at    | NUP43                  | 0.60<br>2 | 1.52 | 5.53E-06 | 7.10E-05 |
| 203938_s_at  | TAF1C                  | 0.60<br>2 | 1.52 | 3.74E-07 | 8.19E-06 |
| 203148_s_at  | TRIM14                 | 0.60<br>1 | 1.52 | 3.63E-06 | 5.07E-05 |
| 1556464_a_at | C2orf72                | 0.60<br>1 | 1.52 | 9.49E-07 | 1.71E-05 |
| 206133_at    | XAF1                   | 0.60<br>1 | 1.52 | 7.63E-04 | 3.63E-03 |
| 219279_at    | DOCK10                 | 0.60<br>1 | 1.52 | 1.11E-05 | 1.24E-04 |
| 219451_at    | MSRB2                  | 0.60<br>1 | 1.52 | 3.69E-06 | 5.13E-05 |

|              |                           |             |      |          |          |
|--------------|---------------------------|-------------|------|----------|----------|
| 238078_at    | SEC22A                    | 0.60<br>1   | 1.52 | 2.75E-05 | 2.57E-04 |
| 211889_x_at  | CEACAM1                   | 0.60<br>1   | 1.52 | 5.73E-05 | 4.62E-04 |
| 230210_at    | SUN1                      | 0.60<br>1   | 1.52 | 6.96E-05 | 5.40E-04 |
| 203920_at    | NR1H3                     | 0.6         | 1.52 | 2.68E-04 | 1.59E-03 |
| 226634_at    | METTL10                   | 0.6         | 1.52 | 2.15E-05 | 2.12E-04 |
| 1563088_a_at | LOC284837                 | 0.6         | 1.52 | 1.84E-03 | 7.33E-03 |
| 207509_s_at  | LAIR2                     | 0.6         | 1.52 | 5.31E-05 | 4.36E-04 |
| 219139_s_at  | CROCCP3                   | 0.6         | 1.52 | 4.04E-03 | 1.39E-02 |
| 236623_at    | ATP1A1OS                  | 0.6         | 1.52 | 2.18E-03 | 8.42E-03 |
| 37965_at     | PARVB                     | 0.6<br>0.59 | 1.52 | 1.80E-05 | 1.84E-04 |
| 240014_at    | POLR2J4                   | 9           | 1.52 | 1.00E-03 | 4.53E-03 |
| 242605_at    | DCN                       | 0.59<br>9   | 1.52 | 1.92E-04 | 1.23E-03 |
| 219014_at    | PLAC8                     | 9           | 1.52 | 8.31E-04 | 3.89E-03 |
| 220756_s_at  | SLC52A1                   | 0.59<br>9   | 1.52 | 1.62E-02 | 4.23E-02 |
| 215346_at    | CD40                      | 9           | 1.52 | 1.05E-07 | 2.99E-06 |
| 243951_at    | ABCB1                     | 0.59<br>9   | 1.51 | 1.05E-05 | 1.19E-04 |
| 214454_at    | ADAMTS2                   | 9           | 1.51 | 3.30E-04 | 1.88E-03 |
| 213392_at    | IQCK                      | 0.59<br>9   | 1.51 | 3.24E-05 | 2.93E-04 |
| 205590_at    | RASGRP1                   | 0.59<br>9   | 1.51 | 1.06E-06 | 1.88E-05 |
| 201859_at    | SRGN                      | 9           | 1.51 | 3.47E-06 | 4.89E-05 |
| 219559_at    | SLC17A9                   | 0.59<br>9   | 1.51 | 7.26E-07 | 1.39E-05 |
| 215239_x_at  | ZNF273                    | 9           | 1.51 | 4.36E-04 | 2.34E-03 |
| 218869_at    | MLYCD                     | 0.59<br>9   | 1.51 | 6.41E-06 | 7.93E-05 |
| 1552646_at   | IL11RA                    | 8           | 1.51 | 8.73E-07 | 1.60E-05 |
| 230721_at    | C16orf52 /// LOC101060634 | 0.59<br>8   | 1.51 | 1.25E-04 | 8.70E-04 |
| 202709_at    | FMOD                      | 8           | 1.51 | 4.42E-04 | 2.37E-03 |
| 1558881_at   | LINC00924                 | 0.59<br>8   | 1.51 | 2.90E-04 | 1.70E-03 |
| 206950_at    | SCN9A                     | 8           | 1.51 | 4.74E-04 | 2.50E-03 |
| 236605_at    | EIF3K                     | 0.59<br>8   | 1.51 | 6.07E-05 | 4.83E-04 |
| 205083_at    | AOX1                      | 8           | 1.51 | 1.01E-04 | 7.31E-04 |
| 239441_at    | ZNF780A                   | 0.59<br>7   | 1.51 | 1.91E-03 | 7.58E-03 |
| 1552562_at   | ZNF570                    | 7           | 1.51 | 8.86E-04 | 4.10E-03 |
| 204382_at    | NAT9                      | 0.59<br>7   | 1.51 | 1.25E-05 | 1.37E-04 |
| 214470_at    | KLRB1                     | 7           | 1.51 | 4.10E-03 | 1.40E-02 |
| 224525_s_at  | OLA1                      | 0.59<br>7   | 1.51 | 4.84E-04 | 2.54E-03 |

|              |                                                                                       |           |      |          |          |
|--------------|---------------------------------------------------------------------------------------|-----------|------|----------|----------|
| 214107_x_at  | LOC101060440 /// LOC101060471 /// LOC101060522 ///<br>LOC440434 /// NPEPPS /// TBC1D3 | 0.59<br>7 | 1.51 | 3.03E-03 | 1.10E-02 |
| 229604_at    | CMAHP                                                                                 | 0.59<br>7 | 1.51 | 4.58E-04 | 2.43E-03 |
| 224365_s_at  | TIGD7                                                                                 | 0.59<br>7 | 1.51 | 1.47E-04 | 9.88E-04 |
| 205160_at    | PEX11A                                                                                | 0.59<br>7 | 1.51 | 3.78E-04 | 2.09E-03 |
| 239118_at    | KCNA2                                                                                 | 0.59<br>6 | 1.51 | 6.09E-03 | 1.93E-02 |
| 226938_at    | DCAF4                                                                                 | 0.59<br>6 | 1.51 | 7.41E-08 | 2.31E-06 |
| 203153_at    | IFIT1                                                                                 | 0.59<br>6 | 1.51 | 3.96E-04 | 2.16E-03 |
| 228618_at    | PEAR1                                                                                 | 0.59<br>6 | 1.51 | 4.17E-04 | 2.26E-03 |
| 204059_s_at  | ME1                                                                                   | 0.59<br>6 | 1.51 | 2.48E-05 | 2.38E-04 |
| 211434_s_at  | CCRL2                                                                                 | 0.59<br>6 | 1.51 | 3.15E-04 | 1.81E-03 |
| 223520_s_at  | KIF13A                                                                                | 0.59<br>6 | 1.51 | 5.32E-05 | 4.36E-04 |
| 235695_at    | INPP4A                                                                                | 0.59<br>6 | 1.51 | 5.60E-05 | 4.53E-04 |
| 208436_s_at  | IRF7                                                                                  | 0.59<br>6 | 1.51 | 4.83E-05 | 4.04E-04 |
| 228377_at    | KLHL14                                                                                | 0.59<br>6 | 1.51 | 8.06E-04 | 3.79E-03 |
| 207156_at    | HIST1H2AG /// HIST1H2AH /// HIST1H2AI /// HIST1H2AK<br>/// HIST1H2AL /// HIST1H2AM    | 0.59<br>6 | 1.51 | 1.08E-02 | 3.04E-02 |
| 228213_at    | H2AFJ                                                                                 | 0.59<br>5 | 1.51 | 4.62E-07 | 9.60E-06 |
| 218972_at    | TTC17                                                                                 | 0.59<br>5 | 1.51 | 3.09E-07 | 7.09E-06 |
| 243534_at    | CC2D2B /// LOC100652732                                                               | 0.59<br>5 | 1.51 | 9.43E-04 | 4.31E-03 |
| 244345_at    | CADM1                                                                                 | 0.59<br>5 | 1.51 | 8.87E-04 | 4.10E-03 |
| 222052_at    | C19orf54                                                                              | 0.59<br>5 | 1.51 | 2.36E-06 | 3.60E-05 |
| 204046_at    | PLCB2                                                                                 | 0.59<br>5 | 1.51 | 8.92E-07 | 1.63E-05 |
| 218610_s_at  | CPPED1                                                                                | 0.59<br>5 | 1.51 | 3.53E-08 | 1.27E-06 |
| 212238_at    | ASXL1                                                                                 | 0.59<br>5 | 1.51 | 1.83E-05 | 1.86E-04 |
| 212913_at    | MSH5 /// MSH5-SAPCD1 /// SAPCD1                                                       | 0.59<br>4 | 1.51 | 6.55E-06 | 8.07E-05 |
| 235054_at    | NUDT16                                                                                | 0.59<br>4 | 1.51 | 1.60E-06 | 2.62E-05 |
| 228891_at    | SEMA4D                                                                                | 0.59<br>4 | 1.51 | 6.86E-04 | 3.34E-03 |
| 214427_at    | NOP2                                                                                  | 0.59<br>4 | 1.51 | 4.11E-05 | 3.56E-04 |
| 230725_at    | ANKRD32                                                                               | 0.59<br>4 | 1.51 | 1.30E-06 | 2.22E-05 |
| 221810_at    | RAB15                                                                                 | 0.59<br>4 | 1.51 | 2.70E-05 | 2.54E-04 |
| 233072_at    | NTNG2                                                                                 | 0.59<br>4 | 1.51 | 1.47E-05 | 1.55E-04 |
| 1553973_a_at | SPINK6                                                                                | 0.59<br>4 | 1.51 | 3.64E-03 | 1.27E-02 |
| 218546_at    | C1orf115                                                                              | 0.59<br>4 | 1.51 | 7.05E-06 | 8.60E-05 |
| 220418_at    | UBASH3A                                                                               | 0.59<br>3 | 1.51 | 9.65E-06 | 1.11E-04 |



|              |                            |           |      |          |          |
|--------------|----------------------------|-----------|------|----------|----------|
| 218945_at    | METTL22                    | 0.59<br>3 | 1.51 | 2.36E-05 | 2.29E-04 |
| 202390_s_at  | HTT                        | 0.59<br>3 | 1.51 | 3.16E-06 | 4.54E-05 |
| 206577_at    | VIP                        | 0.59<br>3 | 1.51 | 3.11E-03 | 1.13E-02 |
| 228521_s_at  | MIA-RAB4B /// RAB4B        | 0.59<br>3 | 1.51 | 5.55E-05 | 4.50E-04 |
| 202902_s_at  | CTSS                       | 0.59<br>3 | 1.51 | 1.46E-04 | 9.84E-04 |
| 220170_at    | FHL5                       | 0.59<br>2 | 1.51 | 4.62E-04 | 2.45E-03 |
| 206919_at    | ELK4                       | 0.59<br>2 | 1.51 | 1.58E-04 | 1.05E-03 |
| 1557545_s_at | RNF165                     | 0.59<br>2 | 1.51 | 5.12E-07 | 1.04E-05 |
| 239929_at    | PM20D1                     | 0.59<br>2 | 1.51 | 3.74E-03 | 1.30E-02 |
| 207183_at    | GPR19                      | 0.59<br>2 | 1.51 | 8.57E-04 | 3.98E-03 |
| 222919_at    | TRDN                       | 0.59<br>2 | 1.51 | 3.62E-04 | 2.02E-03 |
| 231369_at    | ZNF333                     | 0.59<br>2 | 1.51 | 2.53E-03 | 9.48E-03 |
| 243087_at    | WDR63                      | 0.59<br>2 | 1.51 | 3.23E-04 | 1.85E-03 |
| 201042_at    | TGM2                       | 0.59<br>1 | 1.51 | 7.19E-04 | 3.46E-03 |
| 207720_at    | LOR                        | 0.59<br>1 | 1.51 | 6.47E-04 | 3.19E-03 |
| 227679_at    | HDAC11                     | 0.59<br>1 | 1.51 | 6.99E-04 | 3.39E-03 |
| 224480_s_at  | AGPAT9                     | 0.59      | 1.51 | 3.14E-04 | 1.81E-03 |
| 226692_at    | HYPK /// MIR1282 /// SERF2 | 0.59      | 1.51 | 8.21E-08 | 2.50E-06 |
| 223582_at    | GPR98                      | 0.59      | 1.51 | 1.39E-04 | 9.49E-04 |
| 232873_at    | ZNF33A                     | 0.59      | 1.51 | 1.91E-03 | 7.59E-03 |
| 204428_s_at  | LCAT                       | 0.59      | 1.51 | 2.19E-04 | 1.36E-03 |
| 238062_at    | GPIHBP1                    | 0.59      | 1.51 | 2.29E-03 | 8.79E-03 |
| 219622_at    | RAB20                      | 0.59      | 1.51 | 6.62E-05 | 5.18E-04 |
| 238036_at    | SHE                        | 0.59      | 1.51 | 1.84E-03 | 7.35E-03 |
| 219797_at    | MGAT4A                     | 0.59      | 1.51 | 2.53E-04 | 1.52E-03 |
| 225185_at    | MRAS                       | 0.59      | 1.51 | 1.47E-03 | 6.16E-03 |
| 55583_at     | DOCK6                      | 0.59      | 1.51 | 1.77E-05 | 1.81E-04 |
| 205051_s_at  | KIT                        | 0.59      | 1.5  | 3.58E-07 | 7.90E-06 |
| 213975_s_at  | LYZ                        | 0.59      | 1.5  | 2.59E-04 | 1.55E-03 |
| 227695_at    | GLYATL1 /// LOC100287413   | 0.59      | 1.5  | 1.53E-06 | 2.54E-05 |
| 202182_at    | KAT2A                      | 0.58<br>9 | 1.5  | 8.60E-05 | 6.43E-04 |
| 239822_at    | LOC100506795               | 0.58<br>9 | 1.5  | 3.57E-03 | 1.25E-02 |
| 218600_at    | LIMD2                      | 0.58<br>9 | 1.5  | 1.15E-06 | 1.99E-05 |
| 220048_at    | EDAR                       | 0.58<br>9 | 1.5  | 8.45E-04 | 3.94E-03 |
| 213651_at    | INPP5J                     | 0.58<br>9 | 1.5  | 8.05E-08 | 2.46E-06 |
| 204174_at    | ALOX5AP                    | 0.58<br>9 | 1.5  | 3.54E-04 | 1.98E-03 |
| 229925_at    | SLC6A17                    | 0.58      | 1.5  | 1.26E-06 | 2.16E-05 |

|              |           |      |      |          |          |
|--------------|-----------|------|------|----------|----------|
|              |           | 9    |      |          |          |
|              |           | 0.58 |      |          |          |
| 209277_at    | TFPI2     | 9    | 1.5  | 3.72E-06 | 5.17E-05 |
|              |           | 0.58 |      |          |          |
| 230061_at    | TM4SF18   | 9    | 1.5  | 2.71E-03 | 1.00E-02 |
|              |           | 0.58 |      |          |          |
| 219506_at    | C1orf54   | 8    | 1.5  | 2.74E-06 | 4.07E-05 |
|              |           | 0.58 |      |          |          |
| 235518_at    | SLC8A1    | 8    | 1.5  | 4.93E-04 | 2.57E-03 |
|              |           | 0.58 |      |          |          |
| 225524_at    | ANTXR2    | 8    | 1.5  | 6.37E-04 | 3.16E-03 |
|              |           | 0.58 |      |          |          |
| 206682_at    | CLEC10A   | 8    | 1.5  | 1.28E-04 | 8.88E-04 |
|              |           | 0.58 |      |          |          |
| 228875_at    | FAM162B   | 7    | 1.5  | 6.60E-04 | 3.24E-03 |
|              |           | 0.58 |      |          |          |
| 214404_x_at  | SPDEF     | 7    | 1.5  | 1.61E-03 | 6.59E-03 |
|              |           | 0.58 |      |          |          |
| 214582_at    | PDE3B     | 7    | 1.5  | 8.78E-03 | 2.59E-02 |
|              |           | 0.58 |      |          |          |
| 230052_s_at  | NFKBID    | 7    | 1.5  | 6.04E-05 | 4.81E-04 |
|              |           | 0.58 |      |          |          |
| 205527_s_at  | GEMIN4    | 7    | 1.5  | 5.53E-06 | 7.10E-05 |
|              |           | 0.58 |      |          |          |
| 1556061_at   | RPP30     | 6    | 1.5  | 8.82E-07 | 1.61E-05 |
|              |           | 0.58 |      |          |          |
| 232547_at    | SRCIN1    | 6    | 1.5  | 7.90E-07 | 1.48E-05 |
|              |           | 0.58 |      |          |          |
| 212695_at    | CRY2      | 6    | 1.5  | 4.34E-07 | 9.11E-06 |
|              |           | 0.58 |      |          |          |
| 238440_at    | CLYBL     | 6    | 1.5  | 1.58E-05 | 1.65E-04 |
|              |           | 0.58 |      |          |          |
| 232012_at    | CAPN1     | 6    | 1.5  | 3.31E-06 | 4.71E-05 |
|              |           | 0.58 |      |          |          |
| 202526_at    | SMAD4     | 6    | 1.5  | 2.39E-04 | 1.45E-03 |
|              |           | 0.58 |      |          |          |
| 212880_at    | WDR7      | 6    | 1.5  | 5.32E-06 | 6.89E-05 |
|              |           | 0.58 |      |          |          |
| 221816_s_at  | PHF11     | 6    | 1.5  | 8.54E-11 | 9.04E-09 |
|              |           | 0.58 |      |          |          |
| 235350_at    | C4orf19   | 6    | 1.5  | 1.09E-03 | 4.86E-03 |
|              |           | 0.58 |      |          |          |
| 235512_at    | CDKL1     | 6    | 1.5  | 1.09E-04 | 7.77E-04 |
|              |           | 0.58 |      |          |          |
| 203094_at    | MAD2L1BP  | 6    | 1.5  | 2.11E-06 | 3.29E-05 |
|              |           | 0.58 |      |          |          |
| 235735_at    | TNFSF8    | 6    | 1.5  | 2.49E-05 | 2.39E-04 |
|              |           | 0.58 |      |          |          |
| 221045_s_at  | PER3      | 5    | 1.5  | 3.48E-03 | 1.23E-02 |
|              |           | 0.58 |      |          |          |
| 1557608_a_at | LOC284080 | 5    | 1.5  | 1.52E-03 | 6.31E-03 |
|              |           | 0.58 |      |          |          |
| 235369_at    | C14orf28  | 5    | 1.5  | 1.77E-06 | 2.85E-05 |
|              |           | 0.58 |      |          |          |
| 213869_x_at  | THY1      | 5    | 1.5  | 4.72E-04 | 2.49E-03 |
|              |           | 0.58 |      |          |          |
| 217903_at    | STRN4     | 5    | 1.5  | 2.61E-04 | 1.56E-03 |
|              |           | 0.58 |      |          |          |
| 201186_at    | LRPAP1    | 5    | 1.5  | 3.24E-06 | 4.63E-05 |
|              |           | -    |      |          |          |
| 1557914_s_at | ERVFH21-1 | 5    | -1.5 | 7.70E-09 | 3.68E-07 |
|              |           | -    |      |          |          |
|              |           | 0.58 |      |          |          |
| 227891_s_at  | TAF15     | 5    | -1.5 | 3.07E-06 | 4.44E-05 |
|              |           | -    |      |          |          |
| 200998_s_at  | CKAP4     | -    | -1.5 | 2.61E-07 | 6.23E-06 |

|             |         |      |          |          |          |
|-------------|---------|------|----------|----------|----------|
|             |         | 0.58 |          |          |          |
|             |         | 6    |          |          |          |
|             |         | -    |          |          |          |
| 222708_s_at | STX17   | 0.58 |          |          |          |
|             |         | 6    | -1.5     | 3.45E-05 | 3.08E-04 |
|             |         | -    |          |          |          |
| 219235_s_at | PHACTR4 | 0.58 |          |          |          |
|             |         | 6    | -1.5     | 1.02E-03 | 4.59E-03 |
|             |         | -    |          |          |          |
| 222558_at   | RPRD1A  | 0.58 |          |          |          |
|             |         | 6    | -1.5     | 5.01E-04 | 2.60E-03 |
|             |         | -    |          |          |          |
| 1554557_at  | ATP11B  | 0.58 |          |          |          |
|             |         | 6    | -1.5     | 1.77E-04 | 1.15E-03 |
|             |         | -    |          |          |          |
| 214785_at   | VPS13A  | 0.58 |          |          |          |
|             |         | 6    | -1.5     | 1.26E-05 | 1.37E-04 |
|             |         | -    |          |          |          |
| 1559413_at  | TCP11L2 | 0.58 |          |          |          |
|             |         | 6    | -1.5     | 1.40E-04 | 9.51E-04 |
|             |         | -    |          |          |          |
| 225656_at   | EFHC1   | 0.58 |          |          |          |
|             |         | 7    | -1.5     | 6.22E-03 | 1.96E-02 |
|             |         | -    |          |          |          |
| 203276_at   | LMNB1   | 0.58 |          |          |          |
|             |         | 7    | -1.5     | 1.63E-06 | 2.65E-05 |
|             |         | -    |          |          |          |
| 239012_at   | RNF144B | 0.58 |          |          |          |
|             |         | 7    | -1.5     | 2.28E-04 | 1.40E-03 |
|             |         | -    |          |          |          |
| 222559_s_at | RPRD1A  | 0.58 |          |          |          |
|             |         | 7    | -1.5     | 1.40E-03 | 5.94E-03 |
|             |         | -    |          |          |          |
| 208649_s_at | VCP     | 0.58 |          |          |          |
|             |         | 8    | -1.5     | 1.56E-04 | 1.04E-03 |
|             |         | -    |          |          |          |
| 207683_at   | FOXN1   | 0.58 |          |          |          |
|             |         | 8    | -1.5     | 1.38E-09 | 9.04E-08 |
|             |         | -    |          |          |          |
| 224008_s_at | KCNK7   | 0.58 |          |          |          |
|             |         | 8    | -1.5     | 2.56E-03 | 9.59E-03 |
|             |         | -    |          |          |          |
| 238871_at   | MLLT4   | 0.58 |          |          |          |
|             |         | 8    | -1.5     | 3.85E-06 | 5.32E-05 |
|             |         | -    |          |          |          |
| 1569714_at  | ZFYVE20 | 0.58 |          |          |          |
|             |         | 8    | -1.5     | 9.46E-06 | 1.09E-04 |
|             |         | -    |          |          |          |
| 208249_s_at | TGDS    | 0.58 |          |          |          |
|             |         | 9    | -1.5     | 1.27E-08 | 5.43E-07 |
|             |         | -    |          |          |          |
| 223005_s_at | TMEM245 | 0.58 |          |          |          |
|             |         | 9    | -1.5     | 6.19E-05 | 4.91E-04 |
|             |         | -    |          |          |          |
| 232349_x_at | DCAF6   | 0.58 |          |          |          |
|             |         | 9    | -1.5     | 7.28E-05 | 5.60E-04 |
|             |         | -    |          |          |          |
| 235281_x_at | AHNAK   | 0.58 |          |          |          |
|             |         | 9    | -1.5     | 1.03E-02 | 2.93E-02 |
|             |         | -    |          |          |          |
| 217787_s_at | GALNT2  | 0.58 |          |          |          |
|             |         | 9    | -1.5     | 7.61E-07 | 1.44E-05 |
|             |         | -    |          |          |          |
| 218755_at   | KIF20A  | 0.58 |          |          |          |
|             |         | 9    | -1.5     | 2.65E-04 | 1.57E-03 |
|             |         | -    |          |          |          |
| 222591_at   | STYXL1  | 0.58 |          |          |          |
|             |         | -1.5 | 1.77E-05 | 1.81E-04 |          |

|             |                          |       |      |          |          |
|-------------|--------------------------|-------|------|----------|----------|
|             |                          | 9     |      |          |          |
|             |                          | -     |      |          |          |
|             |                          | 0.58  |      |          |          |
| 216600_x_at | ALDOB                    | 9     | -1.5 | 1.67E-08 | 6.83E-07 |
| 226396_at   | TEN1 /// TEN1-CDK3       | -0.59 | -1.5 | 1.55E-04 | 1.03E-03 |
| 212002_at   | SZRD1                    | -0.59 | -1.5 | 1.11E-03 | 4.90E-03 |
|             |                          | -     |      |          |          |
| 223145_s_at | AKIRIN2                  | -0.59 | 1.51 | 3.81E-05 | 3.34E-04 |
|             |                          | -     |      |          |          |
| 237016_at   | TMEM217                  | -0.59 | 1.51 | 1.95E-03 | 7.70E-03 |
|             |                          | -     |      |          |          |
| 233660_at   | EHD4                     | -0.59 | 1.51 | 1.19E-04 | 8.37E-04 |
|             |                          | -     |      |          |          |
| 225697_at   | CDK12                    | -0.59 | 1.51 | 1.00E-03 | 4.53E-03 |
|             |                          | -     |      |          |          |
|             |                          | 0.59  | -    |          |          |
| 240078_at   | SFSWAP                   | 1     | 1.51 | 6.99E-05 | 5.42E-04 |
|             |                          | -     |      |          |          |
|             |                          | 0.59  | -    |          |          |
| 215533_s_at | UBE4B                    | 1     | 1.51 | 8.28E-05 | 6.24E-04 |
|             |                          | -     |      |          |          |
|             |                          | 0.59  | -    |          |          |
| 205872_x_at | LOC101060353 /// PDE4DIP | 1     | 1.51 | 9.53E-04 | 4.35E-03 |
|             |                          | -     |      |          |          |
|             |                          | 0.59  | -    |          |          |
| 210761_s_at | GRB7                     | 1     | 1.51 | 1.56E-05 | 1.63E-04 |
|             |                          | -     |      |          |          |
|             |                          | 0.59  | -    |          |          |
| 229776_at   | SLCO3A1                  | 1     | 1.51 | 1.01E-06 | 1.80E-05 |
|             |                          | -     |      |          |          |
|             |                          | 0.59  | -    |          |          |
| 212442_s_at | CERS6                    | 1     | 1.51 | 3.15E-06 | 4.53E-05 |
|             |                          | -     |      |          |          |
|             |                          | 0.59  | -    |          |          |
| 206582_s_at | GPR56                    | 2     | 1.51 | 7.09E-07 | 1.36E-05 |
|             |                          | -     |      |          |          |
|             |                          | 0.59  | -    |          |          |
| 219112_at   | FNIP1 /// RAPGEF6        | 2     | 1.51 | 1.79E-03 | 7.18E-03 |
|             |                          | -     |      |          |          |
|             |                          | 0.59  | -    |          |          |
| 212590_at   | RRAS2                    | 2     | 1.51 | 9.54E-07 | 1.72E-05 |
|             |                          | -     |      |          |          |
|             |                          | 0.59  | -    |          |          |
| 226352_at   | JMY                      | 2     | 1.51 | 9.26E-12 | 1.39E-09 |
|             |                          | -     |      |          |          |
|             |                          | 0.59  | -    |          |          |
| 204506_at   | PPP3R1                   | 3     | 1.51 | 2.63E-05 | 2.49E-04 |
|             |                          | -     |      |          |          |
|             |                          | 0.59  | -    |          |          |
| 215109_at   | RC3H1                    | 3     | 1.51 | 1.29E-03 | 5.53E-03 |
|             |                          | -     |      |          |          |
|             |                          | 0.59  | -    |          |          |
| 230630_at   | AK4 /// LOC100507855     | 3     | 1.51 | 6.26E-03 | 1.97E-02 |
|             |                          | -     |      |          |          |
|             |                          | 0.59  | -    |          |          |
| 229252_at   | ATG9B                    | 3     | 1.51 | 2.89E-05 | 2.68E-04 |
|             |                          | -     |      |          |          |
|             |                          | 0.59  | -    |          |          |
| 205254_x_at | TCF7                     | 4     | 1.51 | 1.05E-07 | 2.99E-06 |
|             |                          | -     |      |          |          |
|             |                          | 0.59  | -    |          |          |
| 214499_s_at | BCLAF1                   | 4     | 1.51 | 2.84E-05 | 2.64E-04 |
|             |                          | -     |      |          |          |
|             |                          | 0.59  | -    |          |          |
| 33148_at    | ZFR                      | 4     | 1.51 | 2.95E-05 | 2.72E-04 |

|              |           |   |      |          |          |  |
|--------------|-----------|---|------|----------|----------|--|
|              |           |   | 0.59 | -        |          |  |
| 227371_at    | BAIAP2L1  | 5 | 1.51 | 1.50E-05 | 1.58E-04 |  |
|              |           |   | 0.59 | -        |          |  |
| 1569064_at   | C15orf62  | 5 | 1.51 | 3.83E-09 | 2.10E-07 |  |
|              |           |   | 0.59 | -        |          |  |
| 212162_at    | KIDINS220 | 5 | 1.51 | 1.94E-04 | 1.24E-03 |  |
|              |           |   | 0.59 | -        |          |  |
| 203870_at    | USP46     | 5 | 1.51 | 4.97E-07 | 1.02E-05 |  |
|              |           |   | 0.59 | -        |          |  |
| 207120_at    | ZNF667    | 5 | 1.51 | 8.75E-08 | 2.61E-06 |  |
|              |           |   | 0.59 | -        |          |  |
| 232392_at    | SRSF3     | 5 | 1.51 | 3.54E-09 | 1.97E-07 |  |
|              |           |   | 0.59 | -        |          |  |
| 206652_at    | ZMYM5     | 5 | 1.51 | 3.64E-03 | 1.27E-02 |  |
|              |           |   | 0.59 | -        |          |  |
| 210711_at    | LINC00260 | 5 | 1.51 | 2.49E-04 | 1.51E-03 |  |
|              |           |   | 0.59 | -        |          |  |
| 212662_at    | PVR       | 5 | 1.51 | 1.90E-04 | 1.21E-03 |  |
|              |           |   | 0.59 | -        |          |  |
| 239148_at    | MARVELD3  | 6 | 1.51 | 5.29E-06 | 6.87E-05 |  |
|              |           |   | 0.59 | -        |          |  |
| 212720_at    | PAPOLA    | 6 | 1.51 | 5.34E-04 | 2.74E-03 |  |
|              |           |   | 0.59 | -        |          |  |
| 227405_s_at  | FZD8      | 6 | 1.51 | 1.13E-04 | 8.05E-04 |  |
|              |           |   | 0.59 | -        |          |  |
| 227241_at    | MUC15     | 7 | 1.51 | 8.29E-05 | 6.24E-04 |  |
|              |           |   | 0.59 | -        |          |  |
| 219001_s_at  | DCAF10    | 7 | 1.51 | 6.38E-03 | 2.00E-02 |  |
|              |           |   | 0.59 | -        |          |  |
| 222039_at    | KIF18B    | 7 | 1.51 | 4.17E-06 | 5.67E-05 |  |
|              |           |   | 0.59 | -        |          |  |
| 205152_at    | SLC6A1    | 7 | 1.51 | 1.52E-04 | 1.02E-03 |  |
|              |           |   | 0.59 | -        |          |  |
| 1552618_at   | STX6      | 8 | 1.51 | 2.89E-05 | 2.68E-04 |  |
|              |           |   | 0.59 | -        |          |  |
| 215754_at    | SCARB2    | 8 | 1.51 | 2.03E-04 | 1.28E-03 |  |
|              |           |   | 0.59 | -        |          |  |
| 1555972_s_at | FBXO28    | 8 | 1.51 | 9.76E-06 | 1.12E-04 |  |
|              |           |   | 0.59 | -        |          |  |
| 243792_x_at  | PTPN13    | 8 | 1.51 | 2.43E-03 | 9.17E-03 |  |
|              |           |   | 0.59 | -        |          |  |
| 91684_g_at   | EXOSC4    | 8 | 1.51 | 4.07E-09 | 2.21E-07 |  |
|              |           |   | 0.59 | -        |          |  |
| 225211_at    | PVRL1     | 9 | 1.51 | 9.20E-07 | 1.67E-05 |  |

|              |                   |      |      |          |          |
|--------------|-------------------|------|------|----------|----------|
|              |                   | -    |      |          |          |
| 229275_at    | IGFN1             | 0.59 | -    |          |          |
|              |                   | 9    | 1.51 | 2.26E-05 | 2.21E-04 |
|              |                   | -    |      |          |          |
| 227998_at    | S100A16           | 0.59 | -    |          |          |
|              |                   | 9    | 1.51 | 1.95E-12 | 3.72E-10 |
|              |                   | -    |      |          |          |
| 225387_at    | TSPAN5            | 0.59 | -    |          |          |
|              |                   | 9    | 1.51 | 1.82E-08 | 7.32E-07 |
|              |                   | -    |      |          |          |
| 201364_s_at  | OAZ2              | 0.59 | -    |          |          |
|              |                   | 9    | 1.52 | 3.89E-05 | 3.40E-04 |
|              |                   | -    |      |          |          |
| 40016_g_at   | MAST4             | 0.59 | -    |          |          |
|              |                   | 9    | 1.52 | 4.28E-05 | 3.67E-04 |
|              |                   | -    |      |          |          |
| 204545_at    | PEX6              | -0.6 | 1.52 | 2.29E-04 | 1.41E-03 |
|              |                   | -    |      |          |          |
| 206237_s_at  | NRG1              | -0.6 | 1.52 | 1.31E-05 | 1.41E-04 |
|              |                   | -    |      |          |          |
| 223381_at    | NUF2              | -0.6 | 1.52 | 4.73E-04 | 2.49E-03 |
|              |                   | -    |      |          |          |
| 221028_s_at  | GFOD2             | -0.6 | 1.52 | 6.60E-08 | 2.10E-06 |
|              |                   | -    |      |          |          |
| 213796_at    | SPRR1A            | -0.6 | 1.52 | 2.29E-06 | 3.50E-05 |
|              |                   | -    |      |          |          |
| 213931_at    | ID2 /// ID2B      | 0.60 | -    |          |          |
|              |                   | 1    | 1.52 | 1.06E-04 | 7.61E-04 |
|              |                   | -    |      |          |          |
| 1554450_s_at | MIER3             | 0.60 | -    |          |          |
|              |                   | 1    | 1.52 | 1.49E-09 | 9.59E-08 |
|              |                   | -    |      |          |          |
| 218902_at    | NOTCH1            | 0.60 | -    |          |          |
|              |                   | 1    | 1.52 | 1.60E-07 | 4.23E-06 |
|              |                   | -    |      |          |          |
| 206447_at    | CELA2A /// CELA2B | 0.60 | -    |          |          |
|              |                   | 1    | 1.52 | 3.76E-09 | 2.07E-07 |
|              |                   | -    |      |          |          |
| 203574_at    | NFIL3             | 0.60 | -    |          |          |
|              |                   | 2    | 1.52 | 2.11E-06 | 3.28E-05 |
|              |                   | -    |      |          |          |
| 1566901_at   | TGIF1             | 0.60 | -    |          |          |
|              |                   | 2    | 1.52 | 8.23E-05 | 6.21E-04 |
|              |                   | -    |      |          |          |
| 1553603_s_at | ATL2              | 0.60 | -    |          |          |
|              |                   | 2    | 1.52 | 2.11E-11 | 2.81E-09 |
|              |                   | -    |      |          |          |
| 208961_s_at  | KLF6              | 0.60 | -    |          |          |
|              |                   | 3    | 1.52 | 6.49E-03 | 2.03E-02 |
|              |                   | -    |      |          |          |
| 219794_at    | VPS53             | 0.60 | -    |          |          |
|              |                   | 3    | 1.52 | 3.03E-05 | 2.78E-04 |
|              |                   | -    |      |          |          |
| 224778_s_at  | TAOK1             | 0.60 | -    |          |          |
|              |                   | 3    | 1.52 | 2.93E-04 | 1.71E-03 |
|              |                   | -    |      |          |          |
| 222654_at    | IMPAD1            | 0.60 | -    |          |          |
|              |                   | 3    | 1.52 | 3.49E-08 | 1.26E-06 |
|              |                   | -    |      |          |          |
| 230468_s_at  | C1orf56           | 0.60 | -    |          |          |
|              |                   | 3    | 1.52 | 1.41E-04 | 9.58E-04 |
|              |                   | -    |      |          |          |
| 223318_s_at  | ALKBH7            | 0.60 | -    |          |          |
|              |                   | 3    | 1.52 | 1.86E-03 | 7.42E-03 |
|              |                   | -    |      |          |          |
| 225766_s_at  | TNPO1             | 0.60 | -    |          |          |
|              |                   | 3    | 1.52 | 1.19E-08 | 5.19E-07 |

|              |          |      |      |          |          |
|--------------|----------|------|------|----------|----------|
|              |          | -    |      |          |          |
| 224674_at    | TTYH3    | 0.60 | -    |          |          |
|              |          | 4    | 1.52 | 6.34E-07 | 1.23E-05 |
|              |          | -    |      |          |          |
| 214599_at    | IVL      | 0.60 | -    |          |          |
|              |          | 4    | 1.52 | 3.67E-05 | 3.24E-04 |
|              |          | -    |      |          |          |
| 200733_s_at  | PTP4A1   | 0.60 | -    |          |          |
|              |          | 4    | 1.52 | 1.24E-11 | 1.79E-09 |
|              |          | -    |      |          |          |
| 206011_at    | CASP1    | 0.60 | -    |          |          |
|              |          | 4    | 1.52 | 6.85E-09 | 3.35E-07 |
|              |          | -    |      |          |          |
| 1554999_at   | RASGEF1B | 0.60 | -    |          |          |
|              |          | 4    | 1.52 | 8.16E-05 | 6.16E-04 |
|              |          | -    |      |          |          |
| 213924_at    | GNAL     | 0.60 | -    |          |          |
|              |          | 4    | 1.52 | 2.31E-08 | 9.04E-07 |
|              |          | -    |      |          |          |
| 203313_s_at  | TGIF1    | 0.60 | -    |          |          |
|              |          | 4    | 1.52 | 4.52E-05 | 3.82E-04 |
|              |          | -    |      |          |          |
| 1555151_s_at | TDH      | 0.60 | -    |          |          |
|              |          | 5    | 1.52 | 9.00E-05 | 6.66E-04 |
|              |          | -    |      |          |          |
| 203693_s_at  | E2F3     | 0.60 | -    |          |          |
|              |          | 5    | 1.52 | 7.56E-10 | 5.51E-08 |
|              |          | -    |      |          |          |
| 202094_at    | BIRC5    | 0.60 | -    |          |          |
|              |          | 5    | 1.52 | 2.76E-03 | 1.02E-02 |
|              |          | -    |      |          |          |
| 224631_at    | ZFP91    | 0.60 | -    |          |          |
|              |          | 5    | 1.52 | 1.69E-04 | 1.11E-03 |
|              |          | -    |      |          |          |
| 207286_at    | CEP135   | 0.60 | -    |          |          |
|              |          | 5    | 1.52 | 2.57E-03 | 9.63E-03 |
|              |          | -    |      |          |          |
| 222395_s_at  | UBE2Z    | 0.60 | -    |          |          |
|              |          | 5    | 1.52 | 3.44E-04 | 1.93E-03 |
|              |          | -    |      |          |          |
| 1569385_s_at | TET2     | 0.60 | -    |          |          |
|              |          | 5    | 1.52 | 1.85E-04 | 1.19E-03 |
|              |          | -    |      |          |          |
| 227911_at    | ARHGAP28 | 0.60 | -    |          |          |
|              |          | 5    | 1.52 | 2.55E-04 | 1.53E-03 |
|              |          | -    |      |          |          |
| 241946_at    | ZDHHC21  | 0.60 | -    |          |          |
|              |          | 5    | 1.52 | 6.63E-06 | 8.15E-05 |
|              |          | -    |      |          |          |
| 235793_at    | TPGS2    | 0.60 | -    |          |          |
|              |          | 6    | 1.52 | 1.01E-05 | 1.15E-04 |
|              |          | -    |      |          |          |
| 242722_at    | LMO7     | 0.60 | -    |          |          |
|              |          | 6    | 1.52 | 1.05E-02 | 2.97E-02 |
|              |          | -    |      |          |          |
| 212872_s_at  | MED20    | 0.60 | -    |          |          |
|              |          | 6    | 1.52 | 1.64E-07 | 4.31E-06 |
|              |          | -    |      |          |          |
| 201684_s_at  | TOX4     | 0.60 | -    |          |          |
|              |          | 6    | 1.52 | 3.69E-08 | 1.32E-06 |
|              |          | -    |      |          |          |
| 202954_at    | UBE2C    | 0.60 | -    |          |          |
|              |          | 6    | 1.52 | 2.24E-06 | 3.44E-05 |
|              |          | -    |      |          |          |
| 210305_at    | PDE4DIP  | 0.60 | -    |          |          |
|              |          | 6    | 1.52 | 5.62E-04 | 2.86E-03 |

|             |          |       |      |          |          |
|-------------|----------|-------|------|----------|----------|
|             |          | -     |      |          |          |
| 221648_s_at | AGMAT    | 0.60  | -    |          |          |
|             |          | 6     | 1.52 | 1.96E-03 | 7.74E-03 |
|             |          | -     |      |          |          |
| 202897_at   | SIRPA    | 0.60  | -    |          |          |
|             |          | 7     | 1.52 | 6.65E-09 | 3.27E-07 |
|             |          | -     |      |          |          |
| 225685_at   | CDC42EP3 | 0.60  | -    |          |          |
|             |          | 7     | 1.52 | 2.72E-05 | 2.56E-04 |
|             |          | -     |      |          |          |
| 230441_at   | PLEKHG4B | 0.60  | -    |          |          |
|             |          | 7     | 1.52 | 1.06E-05 | 1.20E-04 |
|             |          | -     |      |          |          |
| 1556567_at  | NAP1L4   | 0.60  | -    |          |          |
|             |          | 7     | 1.52 | 3.10E-07 | 7.10E-06 |
|             |          | -     |      |          |          |
| 229213_at   | DIRC2    | 0.60  | -    |          |          |
|             |          | 7     | 1.52 | 3.02E-04 | 1.75E-03 |
|             |          | -     |      |          |          |
| 229596_at   | AMDHD1   | 0.60  | -    |          |          |
|             |          | 7     | 1.52 | 8.44E-03 | 2.51E-02 |
|             |          | -     |      |          |          |
| 207724_s_at | SPAST    | 0.60  | -    |          |          |
|             |          | 8     | 1.52 | 1.43E-04 | 9.71E-04 |
|             |          | -     |      |          |          |
| 217080_s_at | HOMER2   | 0.60  | -    |          |          |
|             |          | 8     | 1.52 | 1.35E-07 | 3.71E-06 |
|             |          | -     |      |          |          |
| 212686_at   | PPM1H    | 0.60  | -    |          |          |
|             |          | 8     | 1.52 | 3.79E-05 | 3.32E-04 |
|             |          | -     |      |          |          |
| 232232_s_at | SLC22A16 | 0.60  | -    |          |          |
|             |          | 8     | 1.52 | 1.20E-03 | 5.23E-03 |
|             |          | -     |      |          |          |
| 213172_at   | TTC9     | 0.60  | -    |          |          |
|             |          | 8     | 1.52 | 7.08E-04 | 3.42E-03 |
|             |          | -     |      |          |          |
| 209647_s_at | SOCS5    | 0.60  | -    |          |          |
|             |          | 8     | 1.52 | 6.39E-08 | 2.06E-06 |
|             |          | -     |      |          |          |
| 239355_at   | GMCL1    | 0.60  | -    |          |          |
|             |          | 9     | 1.52 | 6.00E-09 | 3.01E-07 |
|             |          | -     |      |          |          |
| 213713_s_at | GLB1L2   | 0.60  | -    |          |          |
|             |          | 9     | 1.53 | 1.28E-05 | 1.38E-04 |
|             |          | -     |      |          |          |
| 225792_at   | HOOK1    | 0.60  | -    |          |          |
|             |          | 9     | 1.53 | 2.16E-06 | 3.34E-05 |
|             |          | -     |      |          |          |
| 229682_at   | MAPRE3   | -0.61 | 1.53 | 1.25E-07 | 3.49E-06 |
|             |          | -     |      |          |          |
| 1559975_at  | BTG1     | -0.61 | 1.53 | 1.55E-04 | 1.03E-03 |
|             |          | -     |      |          |          |
| 1558050_at  | EIF2B5   | -0.61 | 1.53 | 4.36E-07 | 9.15E-06 |
|             |          | -     |      |          |          |
| 208054_at   | HERC4    | -0.61 | 1.53 | 1.52E-03 | 6.31E-03 |
|             |          | -     |      |          |          |
| 202500_at   | DNAJB2   | 0.61  | -    |          |          |
|             |          | 1     | 1.53 | 3.12E-07 | 7.13E-06 |
|             |          | -     |      |          |          |
| 235463_s_at | CERS6    | 0.61  | -    |          |          |
|             |          | 1     | 1.53 | 8.75E-08 | 2.61E-06 |
|             |          | -     |      |          |          |
| 226778_at   | TDRP     | 0.61  | -    |          |          |
|             |          | 1     | 1.53 | 4.01E-07 | 8.60E-06 |
|             |          | -     |      |          |          |
| 210148_at   | HIPK3    | 0.61  | 1.53 | 1.85E-06 | 2.95E-05 |



|              |          |      |      |          |          |
|--------------|----------|------|------|----------|----------|
|              |          | 2    |      |          |          |
|              |          | -    |      |          |          |
| 1554795_a_at | FBLIM1   | 0.61 | -    |          |          |
|              |          | 2    | 1.53 | 2.04E-05 | 2.03E-04 |
|              |          | -    |      |          |          |
| 1569065_s_at | C15orf62 | 0.61 | -    |          |          |
|              |          | 2    | 1.53 | 2.56E-07 | 6.13E-06 |
|              |          | -    |      |          |          |
| 201668_x_at  | MARCKS   | 0.61 | -    |          |          |
|              |          | 2    | 1.53 | 5.56E-05 | 4.51E-04 |
|              |          | -    |      |          |          |
| 236953_s_at  | NHLRC3   | 0.61 | -    |          |          |
|              |          | 3    | 1.53 | 1.24E-04 | 8.68E-04 |
|              |          | -    |      |          |          |
| 237346_at    | TGDS     | 0.61 | -    |          |          |
|              |          | 3    | 1.53 | 6.17E-05 | 4.89E-04 |
|              |          | -    |      |          |          |
| 239576_at    | MTUS1    | 0.61 | -    |          |          |
|              |          | 3    | 1.53 | 8.19E-05 | 6.18E-04 |
|              |          | -    |      |          |          |
| 226568_at    | FAM102B  | 0.61 | -    |          |          |
|              |          | 3    | 1.53 | 3.52E-06 | 4.95E-05 |
|              |          | -    |      |          |          |
| 220528_at    | VNN3     | 0.61 | -    |          |          |
|              |          | 3    | 1.53 | 1.56E-02 | 4.11E-02 |
|              |          | -    |      |          |          |
| 232856_at    | LRRC55   | 0.61 | -    |          |          |
|              |          | 4    | 1.53 | 1.42E-04 | 9.63E-04 |
|              |          | -    |      |          |          |
| 203018_s_at  | SSX2IP   | 0.61 | -    |          |          |
|              |          | 4    | 1.53 | 1.63E-04 | 1.07E-03 |
|              |          | -    |      |          |          |
| 234335_s_at  | FAM84A   | 0.61 | -    |          |          |
|              |          | 4    | 1.53 | 1.28E-07 | 3.56E-06 |
|              |          | -    |      |          |          |
| 232371_at    | 7-Mar    | 0.61 | -    |          |          |
|              |          | 4    | 1.53 | 5.65E-07 | 1.12E-05 |
|              |          | -    |      |          |          |
| 210954_s_at  | TSC22D2  | 0.61 | -    |          |          |
|              |          | 4    | 1.53 | 9.96E-06 | 1.14E-04 |
|              |          | -    |      |          |          |
| 229398_at    | RAB18    | 0.61 | -    |          |          |
|              |          | 5    | 1.53 | 1.69E-04 | 1.11E-03 |
|              |          | -    |      |          |          |
| 214374_s_at  | PPFIBP1  | 0.61 | -    |          |          |
|              |          | 5    | 1.53 | 3.83E-03 | 1.33E-02 |
|              |          | -    |      |          |          |
| 1554769_at   | ZNF785   | 0.61 | -    |          |          |
|              |          | 5    | 1.53 | 5.22E-05 | 4.30E-04 |
|              |          | -    |      |          |          |
| 201647_s_at  | SCARB2   | 0.61 | -    |          |          |
|              |          | 5    | 1.53 | 3.19E-07 | 7.25E-06 |
|              |          | -    |      |          |          |
| 235294_at    | SIKE1    | 0.61 | -    |          |          |
|              |          | 6    | 1.53 | 7.81E-04 | 3.70E-03 |
|              |          | -    |      |          |          |
| 236313_at    | CDKN2B   | 0.61 | -    |          |          |
|              |          | 6    | 1.53 | 1.31E-12 | 2.63E-10 |
|              |          | -    |      |          |          |
| 233029_at    | OBSCN    | 0.61 | -    |          |          |
|              |          | 6    | 1.53 | 2.16E-08 | 8.54E-07 |
|              |          | -    |      |          |          |
| 214423_x_at  | ALDOB    | 0.61 | -    |          |          |
|              |          | 6    | 1.53 | 1.96E-08 | 7.83E-07 |
|              |          | -    |      |          |          |
| 1554770_x_at | ZNF785   | 0.61 | 1.53 | 1.41E-05 | 1.50E-04 |

|              |              |       |      |          |          |
|--------------|--------------|-------|------|----------|----------|
|              |              | 6     |      |          |          |
|              |              | -     |      |          |          |
| 1559870_at   | LOC100129129 | 0.61  | -    |          |          |
|              |              | 6     | 1.53 | 1.73E-07 | 4.48E-06 |
|              |              | -     |      |          |          |
| 209496_at    | RARRES2      | 0.61  | -    |          |          |
|              |              | 6     | 1.53 | 1.04E-03 | 4.68E-03 |
|              |              | -     |      |          |          |
| 232322_x_at  | STARD10      | 0.61  | -    |          |          |
|              |              | 6     | 1.53 | 4.74E-05 | 3.98E-04 |
|              |              | -     |      |          |          |
| 227283_at    | EFR3B        | 0.61  | -    |          |          |
|              |              | 7     | 1.53 | 2.12E-04 | 1.32E-03 |
|              |              | -     |      |          |          |
| 225937_at    | CUX1         | 0.61  | -    |          |          |
|              |              | 7     | 1.53 | 6.34E-05 | 5.01E-04 |
|              |              | -     |      |          |          |
| 239650_at    | NCKAP5       | 0.61  | -    |          |          |
|              |              | 7     | 1.53 | 4.35E-06 | 5.88E-05 |
|              |              | -     |      |          |          |
| 205864_at    | SLC7A4       | 0.61  | -    |          |          |
|              |              | 7     | 1.53 | 9.88E-06 | 1.13E-04 |
|              |              | -     |      |          |          |
| 220193_at    | SH3D21       | 0.61  | -    |          |          |
|              |              | 7     | 1.53 | 6.57E-04 | 3.23E-03 |
|              |              | -     |      |          |          |
| 217494_s_at  | PTENP1       | 0.61  | -    |          |          |
|              |              | 8     | 1.53 | 8.65E-05 | 6.46E-04 |
|              |              | -     |      |          |          |
| 203355_s_at  | PSD3         | 0.61  | -    |          |          |
|              |              | 8     | 1.53 | 1.37E-07 | 3.74E-06 |
|              |              | -     |      |          |          |
| 230964_at    | FREM2        | 0.61  | -    |          |          |
|              |              | 8     | 1.53 | 1.45E-02 | 3.87E-02 |
|              |              | -     |      |          |          |
| 217202_s_at  | GLUL         | 0.61  | -    |          |          |
|              |              | 8     | 1.53 | 1.11E-04 | 7.92E-04 |
|              |              | -     |      |          |          |
| 200924_s_at  | SLC3A2       | 0.61  | -    |          |          |
|              |              | 8     | 1.53 | 6.53E-08 | 2.09E-06 |
|              |              | -     |      |          |          |
| 1569149_at   | PDLIM7       | 0.61  | -    |          |          |
|              |              | 8     | 1.54 | 5.60E-09 | 2.87E-07 |
|              |              | -     |      |          |          |
| 204029_at    | CELSR2       | 0.61  | -    |          |          |
|              |              | 9     | 1.54 | 3.98E-14 | 1.34E-11 |
|              |              | -     |      |          |          |
| 203129_s_at  | KIF5C        | 0.61  | -    |          |          |
|              |              | 9     | 1.54 | 4.79E-10 | 3.81E-08 |
|              |              | -     |      |          |          |
| 236013_at    | CACNA1E      | 0.61  | -    |          |          |
|              |              | 9     | 1.54 | 3.18E-04 | 1.82E-03 |
|              |              | -     |      |          |          |
| 228587_at    | FAM83G       | -0.62 | 1.54 | 1.14E-07 | 3.23E-06 |
|              |              | -     |      |          |          |
| 1558540_s_at | SLC2A11      | -0.62 | 1.54 | 3.03E-06 | 4.39E-05 |
|              |              | -     |      |          |          |
| 212532_s_at  | LSM12        | -0.62 | 1.54 | 1.04E-06 | 1.85E-05 |
|              |              | -     |      |          |          |
| 215318_at    | MINOS1P1     | -0.62 | 1.54 | 3.57E-03 | 1.25E-02 |
|              |              | -     |      |          |          |
| 36499_at     | CELSR2       | -0.62 | 1.54 | 4.43E-13 | 1.06E-10 |
|              |              | -     |      |          |          |
| 226003_at    | KIF21A       | -0.62 | 1.54 | 9.92E-11 | 1.02E-08 |
|              |              | -     |      |          |          |
| 202131_s_at  | RIOK3        | -0.62 | 1.54 | 7.04E-05 | 5.45E-04 |

|             |           |       |      |          |          |
|-------------|-----------|-------|------|----------|----------|
| 1552482_at  | RAPH1     | -0.62 | 1.54 | 1.84E-03 | 7.34E-03 |
|             |           | -     |      |          |          |
| 230332_at   | ZCCHC7    | 0.62  | -    |          |          |
|             |           | 1     | 1.54 | 1.00E-02 | 2.88E-02 |
|             |           | -     |      |          |          |
| 202899_s_at | SRSF3     | 0.62  | -    |          |          |
|             |           | 1     | 1.54 | 4.14E-07 | 8.83E-06 |
|             |           | -     |      |          |          |
| 238831_at   | TMEM33    | 0.62  | -    |          |          |
|             |           | 1     | 1.54 | 1.19E-02 | 3.29E-02 |
|             |           | -     |      |          |          |
| 203362_s_at | MAD2L1    | 0.62  | -    |          |          |
|             |           | 1     | 1.54 | 4.26E-06 | 5.78E-05 |
|             |           | -     |      |          |          |
| 244427_at   | KIF23     | 0.62  | -    |          |          |
|             |           | 1     | 1.54 | 5.58E-05 | 4.52E-04 |
|             |           | -     |      |          |          |
| 228128_x_at | PAPPA     | 0.62  | -    |          |          |
|             |           | 1     | 1.54 | 1.05E-05 | 1.19E-04 |
|             |           | -     |      |          |          |
| 201466_s_at | JUN       | 0.62  | -    |          |          |
|             |           | 1     | 1.54 | 2.20E-05 | 2.16E-04 |
|             |           | -     |      |          |          |
| 241733_at   | C18orf54  | 0.62  | -    |          |          |
|             |           | 2     | 1.54 | 8.79E-07 | 1.61E-05 |
|             |           | -     |      |          |          |
| 209803_s_at | PHLDA2    | 0.62  | -    |          |          |
|             |           | 2     | 1.54 | 3.30E-04 | 1.88E-03 |
|             |           | -     |      |          |          |
| 212193_s_at | LARP1     | 0.62  | -    |          |          |
|             |           | 2     | 1.54 | 9.94E-04 | 4.50E-03 |
|             |           | -     |      |          |          |
| 235727_at   | KLHL28    | 0.62  | -    |          |          |
|             |           | 2     | 1.54 | 1.04E-02 | 2.96E-02 |
|             |           | -     |      |          |          |
| 202005_at   | ST14      | 0.62  | -    |          |          |
|             |           | 2     | 1.54 | 1.65E-04 | 1.09E-03 |
|             |           | -     |      |          |          |
| 236001_at   | LINC00675 | 0.62  | -    |          |          |
|             |           | 2     | 1.54 | 6.39E-05 | 5.03E-04 |
|             |           | -     |      |          |          |
| 205034_at   | CCNE2     | 0.62  | -    |          |          |
|             |           | 3     | 1.54 | 1.60E-05 | 1.67E-04 |
|             |           | -     |      |          |          |
| 203803_at   | PCYOX1    | 0.62  | -    |          |          |
|             |           | 3     | 1.54 | 4.01E-03 | 1.38E-02 |
|             |           | -     |      |          |          |
| 200695_at   | PPP2R1A   | 0.62  | -    |          |          |
|             |           | 3     | 1.54 | 3.30E-04 | 1.88E-03 |
|             |           | -     |      |          |          |
| 201233_at   | PSMD13    | 0.62  | -    |          |          |
|             |           | 4     | 1.54 | 2.56E-04 | 1.53E-03 |
|             |           | -     |      |          |          |
| 211352_s_at | NCOA3     | 0.62  | -    |          |          |
|             |           | 4     | 1.54 | 1.44E-03 | 6.03E-03 |
|             |           | -     |      |          |          |
| 202092_s_at | ARL2BP    | 0.62  | -    |          |          |
|             |           | 4     | 1.54 | 6.95E-05 | 5.39E-04 |
|             |           | -     |      |          |          |
| 222875_at   | DHX33     | 0.62  | -    |          |          |
|             |           | 4     | 1.54 | 1.67E-05 | 1.72E-04 |
|             |           | -     |      |          |          |
| 226980_at   | DEPDC1B   | 0.62  | -    |          |          |
|             |           | 5     | 1.54 | 1.39E-04 | 9.47E-04 |
|             |           | -     |      |          |          |
| 208141_s_at | DOHH      | 0.62  | 1.54 | 6.67E-05 | 5.21E-04 |

|              |           |      |      |          |          |
|--------------|-----------|------|------|----------|----------|
|              |           | 5    |      |          |          |
|              |           | -    |      |          |          |
| 211366_x_at  | CASP1     | 0.62 | -    |          |          |
|              |           | 5    | 1.54 | 1.39E-10 | 1.33E-08 |
|              |           | -    |      |          |          |
| 233520_s_at  | CMYA5     | 0.62 | -    |          |          |
|              |           | 5    | 1.54 | 5.04E-04 | 2.61E-03 |
|              |           | -    |      |          |          |
| 225097_at    | HIPK2     | 0.62 | -    |          |          |
|              |           | 6    | 1.54 | 3.56E-04 | 1.99E-03 |
|              |           | -    |      |          |          |
| 207213_s_at  | USP2      | 0.62 | -    |          |          |
|              |           | 6    | 1.54 | 3.71E-04 | 2.06E-03 |
|              |           | -    |      |          |          |
| 208625_s_at  | EIF4G1    | 0.62 | -    |          |          |
|              |           | 6    | 1.54 | 8.58E-06 | 1.01E-04 |
|              |           | -    |      |          |          |
| 200838_at    | CTSB      | 0.62 | -    |          |          |
|              |           | 6    | 1.54 | 2.76E-09 | 1.60E-07 |
|              |           | -    |      |          |          |
| 1556842_at   | LOC286087 | 0.62 | -    |          |          |
|              |           | 6    | 1.54 | 4.58E-04 | 2.43E-03 |
|              |           | -    |      |          |          |
| 1558002_at   | STRAP     | 0.62 | -    |          |          |
|              |           | 6    | 1.54 | 2.68E-04 | 1.59E-03 |
|              |           | -    |      |          |          |
| 1556551_s_at | SLC39A6   | 0.62 | -    |          |          |
|              |           | 6    | 1.54 | 2.54E-04 | 1.53E-03 |
|              |           | -    |      |          |          |
| 222458_s_at  | AKIRIN1   | 0.62 | -    |          |          |
|              |           | 7    | 1.54 | 3.35E-04 | 1.90E-03 |
|              |           | -    |      |          |          |
| 225246_at    | STIM2     | 0.62 | -    |          |          |
|              |           | 7    | 1.54 | 7.20E-07 | 1.38E-05 |
|              |           | -    |      |          |          |
| 215084_s_at  | LRRC42    | 0.62 | -    |          |          |
|              |           | 7    | 1.54 | 1.14E-06 | 1.99E-05 |
|              |           | -    |      |          |          |
| 234351_x_at  | TRPS1     | 0.62 | -    |          |          |
|              |           | 7    | 1.54 | 2.11E-04 | 1.32E-03 |
|              |           | -    |      |          |          |
| 229442_at    | C18orf54  | 0.62 | -    |          |          |
|              |           | 7    | 1.54 | 1.71E-04 | 1.12E-03 |
|              |           | -    |      |          |          |
| 205464_at    | SCNN1B    | 0.62 | -    |          |          |
|              |           | 7    | 1.54 | 1.97E-05 | 1.98E-04 |
|              |           | -    |      |          |          |
| 213446_s_at  | IQGAP1    | 0.62 | -    |          |          |
|              |           | 7    | 1.54 | 9.45E-03 | 2.74E-02 |
|              |           | -    |      |          |          |
| 229280_s_at  | LINC00340 | 0.62 | -    |          |          |
|              |           | 8    | 1.55 | 1.00E-03 | 4.52E-03 |
|              |           | -    |      |          |          |
| 220625_s_at  | ELF5      | 0.62 | -    |          |          |
|              |           | 8    | 1.55 | 3.98E-04 | 2.17E-03 |
|              |           | -    |      |          |          |
| 217921_at    | MAN1A2    | 0.62 | -    |          |          |
|              |           | 8    | 1.55 | 4.03E-06 | 5.52E-05 |
|              |           | -    |      |          |          |
| 1560854_s_at | ZNF107    | 0.62 | -    |          |          |
|              |           | 8    | 1.55 | 9.38E-04 | 4.29E-03 |
|              |           | -    |      |          |          |
| 202575_at    | CRABP2    | 0.62 | -    |          |          |
|              |           | 8    | 1.55 | 7.75E-05 | 5.90E-04 |
|              |           | -    |      |          |          |
| 237030_at    | ACPP      | 0.62 | 1.55 | 2.38E-05 | 2.30E-04 |

|              |                                                                     |       |      |          |          |
|--------------|---------------------------------------------------------------------|-------|------|----------|----------|
|              |                                                                     | 8     |      |          |          |
|              |                                                                     | -     |      |          |          |
| 225234_at    | CBL                                                                 | 0.62  | -    |          |          |
|              |                                                                     | 8     | 1.55 | 1.38E-04 | 9.42E-04 |
|              |                                                                     | -     |      |          |          |
| 1559715_at   | LOC100507391                                                        | 0.62  | -    |          |          |
|              |                                                                     | 9     | 1.55 | 5.75E-09 | 2.93E-07 |
|              |                                                                     | -     |      |          |          |
| 203707_at    | LINC00921 /// ZNF263                                                | 0.62  | -    |          |          |
|              |                                                                     | 9     | 1.55 | 2.32E-07 | 5.67E-06 |
|              |                                                                     | -     |      |          |          |
| 229290_at    | DAPL1                                                               | 0.62  | -    |          |          |
|              |                                                                     | 9     | 1.55 | 3.64E-08 | 1.30E-06 |
|              |                                                                     | -     |      |          |          |
| 209376_x_at  | SCAF11                                                              | 0.62  | -    |          |          |
|              |                                                                     | 9     | 1.55 | 9.02E-05 | 6.67E-04 |
|              |                                                                     | -     |      |          |          |
| 202969_at    | DYRK2                                                               | -0.63 | 1.55 | 8.48E-09 | 3.96E-07 |
|              |                                                                     | -     |      |          |          |
| 202730_s_at  | MIR4680 /// PDCD4                                                   | -0.63 | 1.55 | 1.89E-09 | 1.18E-07 |
|              |                                                                     | -     |      |          |          |
| 239654_at    | CHD9                                                                | -0.63 | 1.55 | 9.37E-04 | 4.29E-03 |
|              |                                                                     | -     |      |          |          |
| 202613_at    | CTPS1                                                               | -0.63 | 1.55 | 1.99E-09 | 1.23E-07 |
|              |                                                                     | -     |      |          |          |
| 1569150_x_at | PDLIM7                                                              | -0.63 | 1.55 | 1.82E-07 | 4.67E-06 |
|              |                                                                     | -     |      |          |          |
| 1553722_s_at | RNF152                                                              | -0.63 | 1.55 | 1.22E-05 | 1.34E-04 |
|              |                                                                     | -     |      |          |          |
| 1552903_at   | B4GALNT2                                                            | -0.63 | 1.55 | 4.82E-08 | 1.63E-06 |
|              |                                                                     | -     |      |          |          |
| 204427_s_at  | TMED2                                                               | -0.63 | 1.55 | 1.68E-03 | 6.81E-03 |
|              |                                                                     | -     |      |          |          |
| 226824_at    | CPXM2                                                               | 0.63  | -    |          |          |
|              |                                                                     | 1     | 1.55 | 2.30E-06 | 3.52E-05 |
|              |                                                                     | -     |      |          |          |
| 207791_s_at  | RAB1A                                                               | 0.63  | -    |          |          |
|              |                                                                     | 1     | 1.55 | 1.53E-03 | 6.32E-03 |
|              |                                                                     | -     |      |          |          |
| 223243_s_at  | EDEM3                                                               | 0.63  | -    |          |          |
|              |                                                                     | 1     | 1.55 | 4.73E-03 | 1.58E-02 |
|              |                                                                     | -     |      |          |          |
| 1555996_s_at | EIF4A2 /// MIR1248 /// SNORA4 /// SNORA63 ///<br>SNORA81 /// SNORD2 | 0.63  | -    |          |          |
|              |                                                                     | 1     | 1.55 | 6.51E-06 | 8.04E-05 |
|              |                                                                     | -     |      |          |          |
| 203391_at    | FKBP2                                                               | 0.63  | -    |          |          |
|              |                                                                     | 1     | 1.55 | 3.54E-05 | 3.14E-04 |
|              |                                                                     | -     |      |          |          |
| 209792_s_at  | KLK10                                                               | 0.63  | -    |          |          |
|              |                                                                     | 1     | 1.55 | 5.33E-05 | 4.37E-04 |
|              |                                                                     | -     |      |          |          |
| 209626_s_at  | OSBPL3                                                              | 0.63  | -    |          |          |
|              |                                                                     | 2     | 1.55 | 5.86E-09 | 2.96E-07 |
|              |                                                                     | -     |      |          |          |
| 231881_at    | CALD1                                                               | 0.63  | -    |          |          |
|              |                                                                     | 2     | 1.55 | 3.69E-05 | 3.25E-04 |
|              |                                                                     | -     |      |          |          |
| 200596_s_at  | EIF3A                                                               | 0.63  | -    |          |          |
|              |                                                                     | 2     | 1.55 | 1.71E-04 | 1.12E-03 |
|              |                                                                     | -     |      |          |          |
| 202124_s_at  | TRAK2                                                               | 0.63  | -    |          |          |
|              |                                                                     | 2     | 1.55 | 8.92E-06 | 1.04E-04 |
|              |                                                                     | -     |      |          |          |
| 201732_s_at  | CLCN3                                                               | 0.63  | -    |          |          |
|              |                                                                     | 2     | 1.55 | 7.63E-04 | 3.63E-03 |
| 227032_at    | PLXNA2                                                              | -     | -    | 6.09E-06 | 7.65E-05 |

|              |         |      |      |          |          |
|--------------|---------|------|------|----------|----------|
|              |         | 0.63 | 1.55 |          |          |
|              |         | 3    |      |          |          |
|              |         | -    |      |          |          |
| 225219_at    | SMAD5   | 0.63 | -    |          |          |
|              |         | 3    | 1.55 | 4.50E-06 | 6.03E-05 |
|              |         | -    |      |          |          |
| 209925_at    | OCLN    | 0.63 | -    |          |          |
|              |         | 3    | 1.55 | 8.62E-06 | 1.01E-04 |
|              |         | -    |      |          |          |
| 235136_at    | ORMDL3  | 0.63 | -    |          |          |
|              |         | 3    | 1.55 | 5.39E-06 | 6.96E-05 |
|              |         | -    |      |          |          |
| 208077_at    | C9orf38 | 0.63 | -    |          |          |
|              |         | 3    | 1.55 | 1.06E-02 | 3.01E-02 |
|              |         | -    |      |          |          |
| 1552390_a_at | C8orf47 | 0.63 | -    |          |          |
|              |         | 3    | 1.55 | 6.20E-08 | 2.00E-06 |
|              |         | -    |      |          |          |
| 228404_at    | IRX2    | 0.63 | -    |          |          |
|              |         | 3    | 1.55 | 2.65E-08 | 1.01E-06 |
|              |         | -    |      |          |          |
| 244801_at    | PSMB7   | 0.63 | -    |          |          |
|              |         | 3    | 1.55 | 1.56E-04 | 1.04E-03 |
|              |         | -    |      |          |          |
| 203397_s_at  | GALNT3  | 0.63 | -    |          |          |
|              |         | 4    | 1.55 | 5.37E-11 | 5.96E-09 |
|              |         | -    |      |          |          |
| 242186_x_at  | LPHN3   | 0.63 | -    |          |          |
|              |         | 4    | 1.55 | 5.92E-04 | 2.97E-03 |
|              |         | -    |      |          |          |
| 233641_s_at  | FAM167A | 0.63 | -    |          |          |
|              |         | 4    | 1.55 | 2.11E-05 | 2.08E-04 |
|              |         | -    |      |          |          |
| 1562321_at   | PDK4    | 0.63 | -    |          |          |
|              |         | 4    | 1.55 | 3.32E-03 | 1.19E-02 |
|              |         | -    |      |          |          |
| 212983_at    | HRAS    | 0.63 | -    |          |          |
|              |         | 4    | 1.55 | 1.11E-05 | 1.24E-04 |
|              |         | -    |      |          |          |
| 206196_s_at  | RUNDC3A | 0.63 | -    |          |          |
|              |         | 4    | 1.55 | 2.36E-05 | 2.29E-04 |
|              |         | -    |      |          |          |
| 223599_at    | TRIM6   | 0.63 | -    |          |          |
|              |         | 5    | 1.55 | 3.20E-03 | 1.15E-02 |
|              |         | -    |      |          |          |
| 235089_at    | FBXL20  | 0.63 | -    |          |          |
|              |         | 5    | 1.55 | 3.58E-06 | 5.02E-05 |
|              |         | -    |      |          |          |
| 222570_at    | NCS1    | 0.63 | -    |          |          |
|              |         | 6    | 1.55 | 5.96E-04 | 2.99E-03 |
|              |         | -    |      |          |          |
| 1555372_at   | BCL2L11 | 0.63 | -    |          |          |
|              |         | 6    | 1.55 | 2.03E-04 | 1.28E-03 |
|              |         | -    |      |          |          |
| 205375_at    | MDF1    | 0.63 | -    |          |          |
|              |         | 6    | 1.55 | 5.93E-09 | 2.98E-07 |
|              |         | -    |      |          |          |
| 202516_s_at  | DLG1    | 0.63 | -    |          |          |
|              |         | 6    | 1.55 | 1.63E-05 | 1.69E-04 |
|              |         | -    |      |          |          |
| 208456_s_at  | RRAS2   | 0.63 | -    |          |          |
|              |         | 6    | 1.55 | 1.05E-04 | 7.55E-04 |
|              |         | -    |      |          |          |
| 228824_s_at  | PTGR1   | 0.63 | -    |          |          |
|              |         | 7    | 1.55 | 1.13E-03 | 4.98E-03 |
|              |         | -    |      |          |          |
| 213899_at    | METAP2  | 0.63 | 1.55 | 4.24E-07 | 8.96E-06 |

|              |              |       |      |          |          |
|--------------|--------------|-------|------|----------|----------|
|              |              | 7     |      |          |          |
|              |              | -     |      |          |          |
| 232983_s_at  | SERGEF       | 0.63  | -    |          |          |
|              |              | 7     | 1.56 | 3.42E-05 | 3.05E-04 |
|              |              | -     |      |          |          |
| 207467_x_at  | CAST         | 0.63  | -    |          |          |
|              |              | 7     | 1.56 | 2.49E-11 | 3.20E-09 |
|              |              | -     |      |          |          |
| 224563_at    | WASF2        | 0.63  | -    |          |          |
|              |              | 7     | 1.56 | 7.81E-03 | 2.36E-02 |
|              |              | -     |      |          |          |
| 228080_at    | LAYN         | 0.63  | -    |          |          |
|              |              | 8     | 1.56 | 3.59E-04 | 2.00E-03 |
|              |              | -     |      |          |          |
| 206543_at    | SMARCA2      | 0.63  | -    |          |          |
|              |              | 8     | 1.56 | 3.72E-05 | 3.27E-04 |
|              |              | -     |      |          |          |
| 222537_s_at  | CDC42SE1     | 0.63  | -    |          |          |
|              |              | 8     | 1.56 | 8.53E-08 | 2.57E-06 |
|              |              | -     |      |          |          |
| 227299_at    | CCNI         | 0.63  | -    |          |          |
|              |              | 8     | 1.56 | 7.31E-03 | 2.24E-02 |
|              |              | -     |      |          |          |
| 205138_s_at  | UST          | 0.63  | -    |          |          |
|              |              | 8     | 1.56 | 3.75E-08 | 1.33E-06 |
|              |              | -     |      |          |          |
| 238231_at    | NFYC         | 0.63  | -    |          |          |
|              |              | 8     | 1.56 | 5.41E-03 | 1.76E-02 |
|              |              | -     |      |          |          |
| 220382_s_at  | ARHGAP28     | 0.63  | -    |          |          |
|              |              | 8     | 1.56 | 5.76E-07 | 1.14E-05 |
|              |              | -     |      |          |          |
| 215203_at    | GOLGA4       | 0.63  | -    |          |          |
|              |              | 9     | 1.56 | 4.55E-03 | 1.53E-02 |
|              |              | -     |      |          |          |
| 236006_s_at  | AKAP10       | 0.63  | -    |          |          |
|              |              | 9     | 1.56 | 2.52E-04 | 1.52E-03 |
|              |              | -     |      |          |          |
| 206382_s_at  | BDNF         | 0.63  | -    |          |          |
|              |              | 9     | 1.56 | 1.74E-06 | 2.80E-05 |
|              |              | -     |      |          |          |
| 212783_at    | RBBP6        | 0.63  | -    |          |          |
|              |              | 9     | 1.56 | 3.34E-08 | 1.21E-06 |
|              |              | -     |      |          |          |
| 1555814_a_at | RHOA         | 0.63  | -    |          |          |
|              |              | 9     | 1.56 | 2.62E-03 | 9.79E-03 |
|              |              | -     |      |          |          |
| 203017_s_at  | SSX2IP       | 0.63  | -    |          |          |
|              |              | 9     | 1.56 | 1.02E-08 | 4.60E-07 |
|              |              | -     |      |          |          |
| 241705_at    | ABCA5        | -0.64 | 1.56 | 2.07E-03 | 8.07E-03 |
|              |              | -     |      |          |          |
| 230195_at    | LOC100131138 | -0.64 | 1.56 | 2.94E-07 | 6.84E-06 |
|              |              | -     |      |          |          |
| 1569815_x_at | STRN         | -0.64 | 1.56 | 8.10E-05 | 6.12E-04 |
|              |              | -     |      |          |          |
| 201830_s_at  | NET1         | -0.64 | 1.56 | 8.51E-09 | 3.97E-07 |
|              |              | -     |      |          |          |
| 229082_at    | CCDC125      | -0.64 | 1.56 | 9.29E-04 | 4.26E-03 |
|              |              | -     |      |          |          |
| 201435_s_at  | EIF4E        | -0.64 | 1.56 | 3.85E-08 | 1.35E-06 |
|              |              | -     |      |          |          |
| 204903_x_at  | ATG4B        | -0.64 | 1.56 | 6.70E-07 | 1.29E-05 |
|              |              | -     |      |          |          |
| 232303_at    | ZNF608       | -0.64 | 1.56 | 3.65E-06 | 5.10E-05 |
|              |              | -     |      |          |          |
| 218045_x_at  | PTMS         | -0.64 | -    | 2.08E-05 | 2.07E-04 |

|              |                                                                                                    |      |      |          |          |
|--------------|----------------------------------------------------------------------------------------------------|------|------|----------|----------|
|              |                                                                                                    |      | 1.56 |          |          |
|              |                                                                                                    | 0.64 | -    |          |          |
| 206877_at    | MXD1                                                                                               | 1    | 1.56 | 3.78E-08 | 1.33E-06 |
|              |                                                                                                    | -    |      |          |          |
|              |                                                                                                    | 0.64 | -    |          |          |
| 218136_s_at  | SLC25A37                                                                                           | 1    | 1.56 | 4.58E-07 | 9.54E-06 |
|              |                                                                                                    | -    |      |          |          |
|              |                                                                                                    | 0.64 | -    |          |          |
| 201526_at    | ARF5                                                                                               | 1    | 1.56 | 3.18E-04 | 1.83E-03 |
|              |                                                                                                    | -    |      |          |          |
|              |                                                                                                    | 0.64 | -    |          |          |
| 229474_at    | MICAL3                                                                                             | 2    | 1.56 | 1.05E-07 | 3.00E-06 |
|              |                                                                                                    | -    |      |          |          |
|              |                                                                                                    | 0.64 | -    |          |          |
| 222422_s_at  | NDFIP1                                                                                             | 2    | 1.56 | 8.30E-08 | 2.51E-06 |
|              |                                                                                                    | -    |      |          |          |
|              |                                                                                                    | 0.64 | -    |          |          |
| 202744_at    | SLC20A2                                                                                            | 2    | 1.56 | 9.67E-09 | 4.40E-07 |
|              |                                                                                                    | -    |      |          |          |
|              |                                                                                                    | 0.64 | -    |          |          |
| 209920_at    | BMPR2                                                                                              | 2    | 1.56 | 4.28E-05 | 3.67E-04 |
|              |                                                                                                    | -    |      |          |          |
|              |                                                                                                    | 0.64 | -    |          |          |
| 1569387_at   | CSGALNACT1                                                                                         | 2    | 1.56 | 1.72E-08 | 6.98E-07 |
|              |                                                                                                    | -    |      |          |          |
|              |                                                                                                    | 0.64 | -    |          |          |
| 1560553_at   | TIAF1                                                                                              | 2    | 1.56 | 2.62E-06 | 3.92E-05 |
|              |                                                                                                    | -    |      |          |          |
|              |                                                                                                    | 0.64 | -    |          |          |
| 216733_s_at  | GATM                                                                                               | 2    | 1.56 | 1.77E-03 | 7.12E-03 |
|              |                                                                                                    | -    |      |          |          |
|              |                                                                                                    | 0.64 | -    |          |          |
| 214121_x_at  | PDLIM7                                                                                             | 2    | 1.56 | 3.91E-07 | 8.45E-06 |
|              |                                                                                                    | -    |      |          |          |
|              |                                                                                                    | 0.64 | -    |          |          |
| 213341_at    | FEM1C                                                                                              | 2    | 1.56 | 1.02E-07 | 2.95E-06 |
|              |                                                                                                    | -    |      |          |          |
|              |                                                                                                    | 0.64 | -    |          |          |
| 209773_s_at  | RRM2                                                                                               | 3    | 1.56 | 2.19E-03 | 8.45E-03 |
|              |                                                                                                    | -    |      |          |          |
|              |                                                                                                    | 0.64 | -    |          |          |
| 1568717_a_at | FKBP15                                                                                             | 3    | 1.56 | 4.88E-03 | 1.62E-02 |
|              |                                                                                                    | -    |      |          |          |
|              |                                                                                                    | 0.64 | -    |          |          |
| 214693_x_at  | LOC101059961 /// LOC101060202 /// LOC101060362 ///<br>LOC101060684 /// NBPF10 /// NBPF12 /// NBPF9 | 4    | 1.56 | 8.66E-05 | 6.46E-04 |
|              |                                                                                                    | -    |      |          |          |
|              |                                                                                                    | 0.64 | -    |          |          |
| 214357_at    | C1orf105                                                                                           | 4    | 1.56 | 4.50E-05 | 3.82E-04 |
|              |                                                                                                    | -    |      |          |          |
|              |                                                                                                    | 0.64 | -    |          |          |
| 201208_s_at  | TNFAIP1                                                                                            | 5    | 1.56 | 1.83E-09 | 1.14E-07 |
|              |                                                                                                    | -    |      |          |          |
|              |                                                                                                    | 0.64 | -    |          |          |
| 221815_at    | ABHD2                                                                                              | 5    | 1.56 | 4.31E-03 | 1.46E-02 |
|              |                                                                                                    | -    |      |          |          |
|              |                                                                                                    | 0.64 | -    |          |          |
| 201320_at    | SMARCC2                                                                                            | 5    | 1.56 | 5.71E-07 | 1.13E-05 |
|              |                                                                                                    | -    |      |          |          |
|              |                                                                                                    | 0.64 | -    |          |          |
| 224901_at    | SCD5                                                                                               | 5    | 1.56 | 4.20E-05 | 3.61E-04 |
|              |                                                                                                    | -    |      |          |          |
|              |                                                                                                    | 0.64 | -    |          |          |
| 1570238_at   | ZNF527                                                                                             | 5    | 1.56 | 2.05E-04 | 1.29E-03 |
|              |                                                                                                    | -    |      |          |          |
|              |                                                                                                    | 0.64 | -    |          |          |
| 1553589_a_at | PDZK1IP1                                                                                           | 6    | 1.56 | 8.98E-03 | 2.63E-02 |



|              |                   |       |      |          |          |
|--------------|-------------------|-------|------|----------|----------|
|              |                   | 5     |      |          |          |
|              |                   | -     |      |          |          |
| 1555749_at   | SF1               | 0.64  | -    |          |          |
|              |                   | 5     | 1.56 | 1.98E-04 | 1.25E-03 |
|              |                   | -     |      |          |          |
| 223906_s_at  | TEX101            | 0.64  | -    |          |          |
|              |                   | 6     | 1.56 | 4.79E-03 | 1.59E-02 |
|              |                   | -     |      |          |          |
| 235088_at    | C4orf46           | 0.64  | -    |          |          |
|              |                   | 6     | 1.56 | 6.06E-07 | 1.19E-05 |
|              |                   | -     |      |          |          |
| 228432_at    | RAB3IP            | 0.64  | -    |          |          |
|              |                   | 6     | 1.57 | 5.94E-06 | 7.51E-05 |
|              |                   | -     |      |          |          |
| 213637_at    | DDX52             | 0.64  | -    |          |          |
|              |                   | 6     | 1.57 | 2.39E-04 | 1.46E-03 |
|              |                   | -     |      |          |          |
| 238909_at    | S100A10           | 0.64  | -    |          |          |
|              |                   | 7     | 1.57 | 3.09E-05 | 2.82E-04 |
|              |                   | -     |      |          |          |
| 218489_s_at  | ALAD              | 0.64  | -    |          |          |
|              |                   | 7     | 1.57 | 1.41E-09 | 9.18E-08 |
|              |                   | -     |      |          |          |
| 244771_at    | KBTBD12           | 0.64  | -    |          |          |
|              |                   | 7     | 1.57 | 4.27E-03 | 1.45E-02 |
|              |                   | -     |      |          |          |
| 243899_at    | ARL17A /// ARL17B | 0.64  | -    |          |          |
|              |                   | 7     | 1.57 | 3.14E-03 | 1.13E-02 |
|              |                   | -     |      |          |          |
| 214004_s_at  | VGLL4             | 0.64  | -    |          |          |
|              |                   | 7     | 1.57 | 1.65E-07 | 4.33E-06 |
|              |                   | -     |      |          |          |
| 217100_s_at  | UBXN7             | 0.64  | -    |          |          |
|              |                   | 7     | 1.57 | 4.13E-04 | 2.24E-03 |
|              |                   | -     |      |          |          |
| 214168_s_at  | TJP1              | 0.64  | -    |          |          |
|              |                   | 8     | 1.57 | 6.56E-06 | 8.08E-05 |
|              |                   | -     |      |          |          |
| 235114_x_at  | HOOK3             | 0.64  | -    |          |          |
|              |                   | 8     | 1.57 | 2.68E-04 | 1.59E-03 |
|              |                   | -     |      |          |          |
| 241620_at    | SMCHD1            | 0.64  | -    |          |          |
|              |                   | 8     | 1.57 | 4.20E-05 | 3.62E-04 |
|              |                   | -     |      |          |          |
| 210417_s_at  | PI4KB             | 0.64  | -    |          |          |
|              |                   | 8     | 1.57 | 2.88E-04 | 1.69E-03 |
|              |                   | -     |      |          |          |
| 229399_at    | C10orf118         | 0.64  | -    |          |          |
|              |                   | 8     | 1.57 | 5.66E-05 | 4.57E-04 |
|              |                   | -     |      |          |          |
| 1555971_s_at | FBXO28            | 0.64  | -    |          |          |
|              |                   | 8     | 1.57 | 8.27E-08 | 2.51E-06 |
|              |                   | -     |      |          |          |
| 235857_at    | KCTD11            | 0.64  | -    |          |          |
|              |                   | 9     | 1.57 | 1.38E-05 | 1.47E-04 |
|              |                   | -     |      |          |          |
| 211132_at    | INTS3             | 0.64  | -    |          |          |
|              |                   | 9     | 1.57 | 9.93E-05 | 7.19E-04 |
|              |                   | -     |      |          |          |
| 212335_at    | GNS               | 0.64  | -    |          |          |
|              |                   | 9     | 1.57 | 4.28E-08 | 1.47E-06 |
|              |                   | -     |      |          |          |
| 206235_at    | LIG4              | 0.64  | -    |          |          |
|              |                   | 9     | 1.57 | 2.67E-09 | 1.56E-07 |
|              |                   | -     |      |          |          |
| 219271_at    | GALNT14           | -0.65 | 1.57 | 2.38E-06 | 3.63E-05 |

|             |          |       |      |          |          |
|-------------|----------|-------|------|----------|----------|
| 214877_at   | CDKAL1   | -0.65 | 1.57 | 1.71E-04 | 1.12E-03 |
| 225262_at   | FOSL2    | -0.65 | 1.57 | 2.85E-06 | 4.19E-05 |
| 206367_at   | REN      | -0.65 | 1.57 | 3.80E-04 | 2.10E-03 |
| 210009_s_at | GOSR2    | -0.65 | 1.57 | 1.74E-04 | 1.13E-03 |
| 1553425_at  | WDR65    | -0.65 | 1.57 | 4.88E-08 | 1.64E-06 |
| 209970_x_at | CASP1    | 0.65  | -    | -        | -        |
|             |          | 1     | 1.57 | 5.74E-11 | 6.30E-09 |
| 203842_s_at | MAPRE3   | 0.65  | -    | -        | -        |
|             |          | 1     | 1.57 | 5.31E-11 | 5.91E-09 |
| 206540_at   | GLB1L    | 0.65  | -    | -        | -        |
|             |          | 2     | 1.57 | 2.99E-06 | 4.36E-05 |
| 228033_at   | E2F7     | 0.65  | -    | -        | -        |
|             |          | 2     | 1.57 | 6.77E-05 | 5.27E-04 |
| 211537_x_at | MAP3K7   | 0.65  | -    | -        | -        |
|             |          | 2     | 1.57 | 1.40E-05 | 1.49E-04 |
| 242592_at   | GPR137C  | 0.65  | -    | -        | -        |
|             |          | 2     | 1.57 | 2.52E-05 | 2.41E-04 |
| 208705_s_at | EIF5     | 0.65  | -    | -        | -        |
|             |          | 3     | 1.57 | 2.11E-07 | 5.29E-06 |
| 218960_at   | TMPRSS4  | 0.65  | -    | -        | -        |
|             |          | 3     | 1.57 | 2.84E-03 | 1.05E-02 |
| 206109_at   | FUT1     | 0.65  | -    | -        | -        |
|             |          | 3     | 1.57 | 1.33E-08 | 5.62E-07 |
| 1556990_at  | PERP     | 0.65  | -    | -        | -        |
|             |          | 3     | 1.57 | 1.07E-03 | 4.77E-03 |
| 214875_x_at | APLP2    | 0.65  | -    | -        | -        |
|             |          | 3     | 1.57 | 2.47E-06 | 3.74E-05 |
| 37028_at    | PPP1R15A | 0.65  | -    | -        | -        |
|             |          | 4     | 1.57 | 8.53E-06 | 1.00E-04 |
| 215611_at   | TCF12    | 0.65  | -    | -        | -        |
|             |          | 4     | 1.57 | 1.54E-04 | 1.03E-03 |
| 225612_s_at | B3GNT5   | 0.65  | -    | -        | -        |
|             |          | 4     | 1.57 | 2.97E-11 | 3.70E-09 |
| 1555827_at  | CCNL1    | 0.65  | -    | -        | -        |
|             |          | 5     | 1.57 | 2.65E-04 | 1.57E-03 |
| 213897_s_at | MRPL23   | 0.65  | -    | -        | -        |
|             |          | 5     | 1.57 | 5.57E-04 | 2.84E-03 |
| 202437_s_at | CYP1B1   | 0.65  | -    | -        | -        |
|             |          | 5     | 1.57 | 1.06E-03 | 4.73E-03 |
| 231193_s_at | TAOK1    | 0.65  | -    | -        | -        |
|             |          | 5     | 1.57 | 7.02E-04 | 3.40E-03 |
| 208707_at   | EIF5     | 0.65  | -    | -        | -        |
|             |          | 5     | 1.57 | 3.30E-07 | 7.42E-06 |

|              |                   |       |      |          |          |  |
|--------------|-------------------|-------|------|----------|----------|--|
|              |                   |       | -    |          |          |  |
| 210535_at    | B9D1              | 0.65  | -    |          |          |  |
|              |                   | 5     | 1.57 | 2.75E-08 | 1.04E-06 |  |
|              |                   | -     |      |          |          |  |
| 206164_at    | CLCA2             | 0.65  | -    |          |          |  |
|              |                   | 6     | 1.58 | 1.59E-07 | 4.21E-06 |  |
|              |                   | -     |      |          |          |  |
| 201683_x_at  | TOX4              | 0.65  | -    |          |          |  |
|              |                   | 6     | 1.58 | 1.10E-04 | 7.85E-04 |  |
|              |                   | -     |      |          |          |  |
| 238756_at    | GAS2L3            | 0.65  | -    |          |          |  |
|              |                   | 6     | 1.58 | 5.37E-08 | 1.78E-06 |  |
|              |                   | -     |      |          |          |  |
| 226077_at    | RNF145            | 0.65  | -    |          |          |  |
|              |                   | 6     | 1.58 | 7.97E-08 | 2.44E-06 |  |
|              |                   | -     |      |          |          |  |
| 232217_at    | FAM26E            | 0.65  | -    |          |          |  |
|              |                   | 7     | 1.58 | 1.38E-02 | 3.72E-02 |  |
|              |                   | -     |      |          |          |  |
| 227748_at    | RBMXL1            | 0.65  | -    |          |          |  |
|              |                   | 7     | 1.58 | 8.26E-04 | 3.87E-03 |  |
|              |                   | -     |      |          |          |  |
| 37577_at     | ARHGAP19          | 0.65  | -    |          |          |  |
|              |                   | 7     | 1.58 | 7.81E-08 | 2.40E-06 |  |
|              |                   | -     |      |          |          |  |
| 224568_x_at  | MALAT1            | 0.65  | -    |          |          |  |
|              |                   | 7     | 1.58 | 1.57E-07 | 4.18E-06 |  |
|              |                   | -     |      |          |          |  |
| 219980_at    | C4orf29           | 0.65  | -    |          |          |  |
|              |                   | 7     | 1.58 | 1.09E-03 | 4.84E-03 |  |
|              |                   | -     |      |          |          |  |
| 223349_s_at  | BOK               | 0.65  | -    |          |          |  |
|              |                   | 8     | 1.58 | 3.67E-06 | 5.12E-05 |  |
|              |                   | -     |      |          |          |  |
| 201848_s_at  | BNIP3             | 0.65  | -    |          |          |  |
|              |                   | 8     | 1.58 | 1.12E-08 | 4.95E-07 |  |
|              |                   | -     |      |          |          |  |
| 235225_at    | SCN2B             | 0.65  | -    |          |          |  |
|              |                   | 8     | 1.58 | 1.68E-07 | 4.39E-06 |  |
|              |                   | -     |      |          |          |  |
| 227481_at    | CNKSR3            | 0.65  | -    |          |          |  |
|              |                   | 8     | 1.58 | 4.89E-07 | 1.00E-05 |  |
|              |                   | -     |      |          |          |  |
| 215074_at    | MYO1B             | 0.65  | -    |          |          |  |
|              |                   | 8     | 1.58 | 6.42E-06 | 7.95E-05 |  |
|              |                   | -     |      |          |          |  |
| 229427_at    | SEMA5A            | 0.65  | -    |          |          |  |
|              |                   | 8     | 1.58 | 1.30E-05 | 1.41E-04 |  |
|              |                   | -     |      |          |          |  |
| 202669_s_at  | EFNB2             | 0.65  | -    |          |          |  |
|              |                   | 8     | 1.58 | 2.68E-03 | 9.97E-03 |  |
|              |                   | -     |      |          |          |  |
| 202971_s_at  | DYRK2             | 0.65  | -    |          |          |  |
|              |                   | 9     | 1.58 | 1.73E-05 | 1.78E-04 |  |
|              |                   | -     |      |          |          |  |
| 1554572_a_at | SUV39H2           | 0.65  | -    |          |          |  |
|              |                   | 9     | 1.58 | 1.32E-07 | 3.62E-06 |  |
|              |                   | -     |      |          |          |  |
| 1554021_a_at | ZNF12             | 0.65  | -    |          |          |  |
|              |                   | 9     | 1.58 | 1.78E-03 | 7.14E-03 |  |
|              |                   | -     |      |          |          |  |
| 213913_s_at  | TBC1D30           | 0.65  | -    |          |          |  |
|              |                   | 9     | 1.58 | 1.47E-02 | 3.92E-02 |  |
|              |                   | -     |      |          |          |  |
| 202731_at    | MIR4680 /// PDCD4 | -0.66 | 1.58 | 4.25E-07 | 9.00E-06 |  |
|              |                   | -     |      |          |          |  |
| 217272_s_at  | SERPINB13         | -0.66 | 1.58 | 4.49E-11 | 5.20E-09 |  |

|              |                                                 |       |          |          |          |
|--------------|-------------------------------------------------|-------|----------|----------|----------|
| 230492_s_at  | GPCPD1                                          | -0.66 | 1.58     | 3.57E-07 | 7.89E-06 |
| 236094_at    | TCF7L2                                          | -0.66 | 1.58     | 1.98E-06 | 3.12E-05 |
| 39249_at     | AQP3                                            | -0.66 | 1.58     | 1.85E-02 | 4.69E-02 |
| 216235_s_at  | EDNRA                                           | -0.66 | 1.58     | 2.42E-07 | 5.87E-06 |
| 223281_s_at  | COX15                                           | 0.66  | -        | -        | -        |
| 228360_at    | LYPD6B                                          | 1     | 1.58     | 4.58E-06 | 6.12E-05 |
| 1554411_at   | CTNNB1                                          | 0.66  | -        | -        | -        |
| 206400_at    | LGALS7 /// LGALS7B                              | 1     | 1.58     | 1.89E-03 | 7.52E-03 |
| 1567458_s_at | RAC1                                            | 0.66  | -        | -        | -        |
| 205436_s_at  | H2AFX                                           | 2     | 1.58     | 1.41E-05 | 1.50E-04 |
| 242079_at    | RGS12                                           | 0.66  | -        | -        | -        |
| 201123_s_at  | EIF5A                                           | 2     | 1.58     | 2.80E-05 | 2.61E-04 |
| 220219_s_at  | LRRC37A /// LRRC37A2 /// LRRC37A3 /// LRRC37A4P | 0.66  | -        | -        | -        |
| 235068_at    | ZDHHC21                                         | 2     | 1.58     | 2.28E-03 | 8.74E-03 |
| 222439_s_at  | THRAP3                                          | 0.66  | -        | -        | -        |
| 212831_at    | MEGF9                                           | 3     | 1.58     | 1.87E-10 | 1.73E-08 |
| 241383_at    | ZNF385C                                         | 0.66  | -        | -        | -        |
| 214918_at    | HNRNPM                                          | 4     | 1.58     | 5.46E-04 | 2.79E-03 |
| 219775_s_at  | CPLX3                                           | 0.66  | -        | -        | -        |
| 200997_at    | RBM14-RBM4 /// RBM4                             | 4     | 1.58     | 1.05E-03 | 4.71E-03 |
| 223661_at    | NUCKS1                                          | 0.66  | -        | -        | -        |
| 1564525_at   | GSN                                             | 4     | 1.58     | 1.12E-04 | 7.98E-04 |
| 239511_s_at  | SRSF4                                           | 0.66  | -        | -        | -        |
| 214580_x_at  | KRT6A /// KRT6B /// KRT6C                       | 4     | 1.58     | 8.65E-03 | 2.55E-02 |
|              |                                                 | 0.66  | -        | -        | -        |
|              |                                                 | 4     | 1.58     | 6.59E-07 | 1.28E-05 |
|              |                                                 | 0.66  | -        | -        | -        |
|              |                                                 | 4     | 1.58     | 1.82E-09 | 1.14E-07 |
|              |                                                 | 0.66  | -        | -        | -        |
|              |                                                 | 4     | 1.58     | 2.93E-04 | 1.71E-03 |
|              |                                                 | 0.66  | -        | -        | -        |
|              |                                                 | 4     | 1.58     | 1.59E-06 | 2.61E-05 |
|              |                                                 | 0.66  | -        | -        | -        |
|              |                                                 | 4     | 1.58     | 3.77E-04 | 2.08E-03 |
|              |                                                 | 0.66  | -        | -        | -        |
|              |                                                 | 1.59  | 2.91E-08 | 1.10E-06 |          |

|              |          |      |      |          |          |
|--------------|----------|------|------|----------|----------|
|              |          | 5    |      |          |          |
|              |          | -    |      |          |          |
| 243649_at    | FBXO7    | 0.66 | -    |          |          |
|              |          | 5    | 1.59 | 2.75E-06 | 4.08E-05 |
|              |          | -    |      |          |          |
| 213938_at    | ERC2     | 0.66 | -    |          |          |
|              |          | 5    | 1.59 | 4.87E-04 | 2.55E-03 |
|              |          | -    |      |          |          |
| 214730_s_at  | GLG1     | 0.66 | -    |          |          |
|              |          | 5    | 1.59 | 8.26E-05 | 6.23E-04 |
|              |          | -    |      |          |          |
| 210125_s_at  | BANF1    | 0.66 | -    |          |          |
|              |          | 6    | 1.59 | 1.81E-05 | 1.84E-04 |
|              |          | -    |      |          |          |
| 200638_s_at  | YWHAZ    | 0.66 | -    |          |          |
|              |          | 6    | 1.59 | 6.46E-08 | 2.07E-06 |
|              |          | -    |      |          |          |
| 218861_at    | RNF25    | 0.66 | -    |          |          |
|              |          | 6    | 1.59 | 9.00E-06 | 1.05E-04 |
|              |          | -    |      |          |          |
| 219671_at    | HPCAL4   | 0.66 | -    |          |          |
|              |          | 7    | 1.59 | 3.14E-07 | 7.17E-06 |
|              |          | -    |      |          |          |
| 225240_s_at  | MSI2     | 0.66 | -    |          |          |
|              |          | 7    | 1.59 | 1.07E-04 | 7.65E-04 |
|              |          | -    |      |          |          |
| 218929_at    | CDKN2AIP | 0.66 | -    |          |          |
|              |          | 7    | 1.59 | 1.02E-10 | 1.05E-08 |
|              |          | -    |      |          |          |
| 227801_at    | TRIM59   | 0.66 | -    |          |          |
|              |          | 7    | 1.59 | 3.70E-06 | 5.15E-05 |
|              |          | -    |      |          |          |
| 206972_s_at  | GPR161   | 0.66 | -    |          |          |
|              |          | 7    | 1.59 | 3.87E-07 | 8.38E-06 |
|              |          | -    |      |          |          |
| 222244_s_at  | TUG1     | 0.66 | -    |          |          |
|              |          | 7    | 1.59 | 1.24E-04 | 8.68E-04 |
|              |          | -    |      |          |          |
| 203056_s_at  | PRDM2    | 0.66 | -    |          |          |
|              |          | 8    | 1.59 | 7.95E-04 | 3.75E-03 |
|              |          | -    |      |          |          |
| 200641_s_at  | YWHAZ    | 0.66 | -    |          |          |
|              |          | 8    | 1.59 | 2.01E-05 | 2.01E-04 |
|              |          | -    |      |          |          |
| 206581_at    | BNC1     | 0.66 | -    |          |          |
|              |          | 8    | 1.59 | 6.24E-10 | 4.77E-08 |
|              |          | -    |      |          |          |
| 228851_s_at  | ENSA     | 0.66 | -    |          |          |
|              |          | 8    | 1.59 | 3.73E-04 | 2.07E-03 |
|              |          | -    |      |          |          |
| 232436_at    | ZNF274   | 0.66 | -    |          |          |
|              |          | 8    | 1.59 | 1.24E-05 | 1.36E-04 |
|              |          | -    |      |          |          |
| 215201_at    | REPS1    | 0.66 | -    |          |          |
|              |          | 9    | 1.59 | 8.36E-05 | 6.29E-04 |
|              |          | -    |      |          |          |
| 241621_at    | SMCHD1   | 0.66 | -    |          |          |
|              |          | 9    | 1.59 | 2.50E-04 | 1.51E-03 |
|              |          | -    |      |          |          |
| 206007_at    | PRG4     | 0.66 | -    |          |          |
|              |          | 9    | 1.59 | 7.70E-04 | 3.66E-03 |
|              |          | -    |      |          |          |
| 1558233_s_at | ATF1     | 0.66 | -    |          |          |
|              |          | 9    | 1.59 | 2.07E-07 | 5.20E-06 |
|              |          | -    |      |          |          |
| 242922_at    | NOMO3    | 0.66 | 1.59 | 2.61E-05 | 2.48E-04 |

|              |                                                    |       |      |          |          |
|--------------|----------------------------------------------------|-------|------|----------|----------|
|              |                                                    | 9     |      |          |          |
|              |                                                    | -     |      |          |          |
| 210372_s_at  | TPD52L1                                            | 0.66  | -    |          |          |
|              |                                                    | 9     | 1.59 | 1.16E-04 | 8.20E-04 |
|              |                                                    | -     |      |          |          |
| 232914_s_at  | SYTL2                                              | 0.66  | -    |          |          |
|              |                                                    | 9     | 1.59 | 1.32E-04 | 9.08E-04 |
|              |                                                    | -     |      |          |          |
| 227828_s_at  | EVA1A                                              | -0.67 | 1.59 | 8.03E-05 | 6.08E-04 |
|              |                                                    | -     |      |          |          |
| 219571_s_at  | ZNF12                                              | -0.67 | 1.59 | 5.57E-04 | 2.84E-03 |
|              |                                                    | -     |      |          |          |
| 235547_at    | N4BP2L2                                            | -0.67 | 1.59 | 3.73E-03 | 1.30E-02 |
|              |                                                    | -     |      |          |          |
| 228531_at    | SAMD9                                              | -0.67 | 1.59 | 1.20E-08 | 5.23E-07 |
|              |                                                    | -     |      |          |          |
| 226933_s_at  | ID4                                                | -0.67 | 1.59 | 4.46E-09 | 2.36E-07 |
|              |                                                    | -     |      |          |          |
| 219648_at    | MREG                                               | -0.67 | 1.59 | 2.26E-15 | 1.35E-12 |
|              |                                                    | -     |      |          |          |
| 200664_s_at  | DNAJB1                                             | 0.67  | -    |          |          |
|              |                                                    | 1     | 1.59 | 5.14E-09 | 2.67E-07 |
|              |                                                    | -     |      |          |          |
| 238168_at    | TM4SF1                                             | 0.67  | -    |          |          |
|              |                                                    | 1     | 1.59 | 1.18E-10 | 1.17E-08 |
|              |                                                    | -     |      |          |          |
| 224889_at    | FOXO3                                              | 0.67  | -    |          |          |
|              |                                                    | 1     | 1.59 | 2.19E-04 | 1.36E-03 |
|              |                                                    | -     |      |          |          |
| 1558249_s_at | STX16                                              | 0.67  | -    |          |          |
|              |                                                    | 1     | 1.59 | 1.91E-07 | 4.86E-06 |
|              |                                                    | -     |      |          |          |
| 224762_at    | SERINC2                                            | 0.67  | -    |          |          |
|              |                                                    | 2     | 1.59 | 4.08E-08 | 1.41E-06 |
|              |                                                    | -     |      |          |          |
| 210061_at    | ZNF589                                             | 0.67  | -    |          |          |
|              |                                                    | 2     | 1.59 | 2.03E-03 | 7.97E-03 |
|              |                                                    | -     |      |          |          |
| 231247_s_at  | LOC727820                                          | 0.67  | -    |          |          |
|              |                                                    | 2     | 1.59 | 4.41E-03 | 1.49E-02 |
|              |                                                    | -     |      |          |          |
| 243435_at    | KCNQ1OT1                                           | 0.67  | -    |          |          |
|              |                                                    | 3     | 1.59 | 1.22E-03 | 5.30E-03 |
|              |                                                    | -     |      |          |          |
| 212897_at    | CDK19                                              | 0.67  | -    |          |          |
|              |                                                    | 3     | 1.59 | 2.06E-05 | 2.05E-04 |
|              |                                                    | -     |      |          |          |
| 222413_s_at  | KMT2C                                              | 0.67  | -    |          |          |
|              |                                                    | 3     | 1.59 | 3.17E-04 | 1.82E-03 |
|              |                                                    | -     |      |          |          |
| 222407_s_at  | ZNF106                                             | 0.67  | -    |          |          |
|              |                                                    | 4     | -1.6 | 7.78E-04 | 3.69E-03 |
|              |                                                    | -     |      |          |          |
| 213330_s_at  | STIP1                                              | 0.67  | -    |          |          |
|              |                                                    | 4     | -1.6 | 1.18E-03 | 5.17E-03 |
|              |                                                    | -     |      |          |          |
| 215817_at    | SERPINB13                                          | 0.67  | -    |          |          |
|              |                                                    | 4     | -1.6 | 3.09E-07 | 7.09E-06 |
|              |                                                    | -     |      |          |          |
| 1564063_a_at | ATP11B                                             | 0.67  | -    |          |          |
|              |                                                    | 4     | -1.6 | 1.42E-05 | 1.50E-04 |
|              |                                                    | -     |      |          |          |
| 222787_s_at  | TMEM106B                                           | 0.67  | -    |          |          |
|              |                                                    | 4     | -1.6 | 1.93E-03 | 7.63E-03 |
|              |                                                    | -     |      |          |          |
| 215123_at    | LOC613037 /// NPIP11 /// NPIP3 /// NPIP4 /// NPIP5 | 0.67  | -1.6 | 4.06E-03 | 1.39E-02 |

|             |          |      |          |          |          |
|-------------|----------|------|----------|----------|----------|
|             |          | 4    |          |          |          |
|             |          | -    |          |          |          |
| 216086_at   | SV2C     | 0.67 |          |          |          |
|             |          | 4    | -1.6     | 1.63E-05 | 1.69E-04 |
|             |          | -    |          |          |          |
| 223103_at   | STARD10  | 0.67 |          |          |          |
|             |          | 5    | -1.6     | 4.67E-06 | 6.22E-05 |
|             |          | -    |          |          |          |
| 229240_at   | ZDHHC21  | 0.67 |          |          |          |
|             |          | 5    | -1.6     | 4.95E-07 | 1.01E-05 |
|             |          | -    |          |          |          |
| 202431_s_at | MYC      | 0.67 |          |          |          |
|             |          | 5    | -1.6     | 3.95E-04 | 2.16E-03 |
|             |          | -    |          |          |          |
| 223682_s_at | EIF1AD   | 0.67 |          |          |          |
|             |          | 5    | -1.6     | 1.50E-07 | 4.03E-06 |
|             |          | -    |          |          |          |
| 208730_x_at | RAB2A    | 0.67 |          |          |          |
|             |          | 6    | -1.6     | 1.14E-11 | 1.65E-09 |
|             |          | -    |          |          |          |
| 206746_at   | BFSP1    | 0.67 |          |          |          |
|             |          | 6    | -1.6     | 1.50E-09 | 9.61E-08 |
|             |          | -    |          |          |          |
| 213692_s_at | VDR      | 0.67 |          |          |          |
|             |          | 7    | -1.6     | 5.15E-06 | 6.71E-05 |
|             |          | -    |          |          |          |
| 236492_at   | PPP2R2A  | 0.67 |          |          |          |
|             |          | 7    | -1.6     | 1.75E-04 | 1.14E-03 |
|             |          | -    |          |          |          |
| 222581_at   | XPR1     | 0.67 |          |          |          |
|             |          | 7    | -1.6     | 6.03E-09 | 3.03E-07 |
|             |          | -    |          |          |          |
| 241455_at   | C6orf132 | 0.67 |          |          |          |
|             |          | 7    | -1.6     | 4.39E-06 | 5.91E-05 |
|             |          | -    |          |          |          |
| 223786_at   | CHST6    | 0.67 |          |          |          |
|             |          | 7    | -1.6     | 5.12E-04 | 2.65E-03 |
|             |          | -    |          |          |          |
| 205422_s_at | ITGBL1   | 0.67 |          |          |          |
|             |          | 7    | -1.6     | 6.42E-04 | 3.18E-03 |
|             |          | -    |          |          |          |
| 204235_s_at | GULP1    | 0.67 |          |          |          |
|             |          | 7    | -1.6     | 1.39E-03 | 5.90E-03 |
|             |          | -    |          |          |          |
| 1553757_at  | IQCG     | 0.67 |          |          |          |
|             |          | 8    | -1.6     | 5.00E-03 | 1.65E-02 |
|             |          | -    |          |          |          |
| 229966_at   | EWSR1    | 0.67 |          |          |          |
|             |          | 8    | -1.6     | 3.00E-03 | 1.09E-02 |
|             |          | -    |          |          |          |
| 222082_at   | ZBTB7A   | 0.67 |          |          |          |
|             |          | 8    | -1.6     | 1.04E-06 | 1.84E-05 |
|             |          | -    |          |          |          |
| 243852_at   | LUC7L2   | 0.67 |          |          |          |
|             |          | 9    | -1.6     | 9.27E-06 | 1.07E-04 |
|             |          | -    |          |          |          |
| 221455_s_at | WNT3     | 0.67 |          |          |          |
|             |          | 9    | -1.6     | 4.59E-13 | 1.08E-10 |
|             |          | -    |          |          |          |
| 222310_at   | SCAF4    | 0.67 |          |          |          |
|             |          | 9    | -1.6     | 5.64E-05 | 4.56E-04 |
|             |          | -    |          |          |          |
| 222878_s_at | OTUB2    | 0.67 |          |          |          |
|             |          | 9    | -1.6     | 1.81E-04 | 1.17E-03 |
|             |          | -    |          |          |          |
| 225388_at   | TSPAN5   | 0.67 |          |          |          |
|             |          | -1.6 | 1.45E-06 | 2.43E-05 |          |

|              |                                       |       |      |          |          |
|--------------|---------------------------------------|-------|------|----------|----------|
|              |                                       | 9     |      |          |          |
|              |                                       | -     |      |          |          |
| 228846_at    | MXD1                                  | 0.67  |      |          |          |
|              |                                       | 9     | -1.6 | 6.58E-09 | 3.24E-07 |
|              |                                       | -     |      |          |          |
|              |                                       | 0.67  |      |          |          |
| 1562270_at   | ARHGEF7                               | 9     | -1.6 | 4.60E-03 | 1.54E-02 |
| 202363_at    | SPOCK1                                | -0.68 | -1.6 | 9.53E-06 | 1.10E-04 |
| 230742_at    | RBM5                                  | -0.68 | -1.6 | 5.88E-04 | 2.95E-03 |
| 231366_at    | FDPSP2                                | -0.68 | -1.6 | 5.27E-03 | 1.72E-02 |
| 1554556_a_at | ATP11B                                | -0.68 | -1.6 | 4.66E-06 | 6.20E-05 |
|              |                                       | -     |      |          |          |
|              |                                       | 0.68  |      |          |          |
| 202461_at    | EIF2B2                                | 1     | -1.6 | 4.87E-08 | 1.64E-06 |
|              |                                       | -     |      |          |          |
|              |                                       | 0.68  |      |          |          |
| 1558356_at   | UACA                                  | 1     | -1.6 | 1.12E-06 | 1.96E-05 |
|              |                                       | -     |      |          |          |
|              |                                       | 0.68  |      |          |          |
| 226027_at    | SWI5                                  | 1     | -1.6 | 4.31E-07 | 9.09E-06 |
|              |                                       | -     |      |          |          |
|              |                                       | 0.68  |      |          |          |
| 202549_at    | VAPB                                  | 1     | -1.6 | 4.12E-05 | 3.56E-04 |
|              |                                       | -     |      |          |          |
|              |                                       | 0.68  |      |          |          |
| 231716_at    | RC3H2                                 | 1     | -1.6 | 2.10E-03 | 8.17E-03 |
|              |                                       | -     |      |          |          |
|              |                                       | 0.68  |      |          |          |
| 221744_at    | DCAF7                                 | 2     | -1.6 | 5.52E-05 | 4.48E-04 |
|              |                                       | -     |      |          |          |
|              |                                       | 0.68  |      |          |          |
| 206668_s_at  | SCAMP1                                | 3     | 1.61 | 2.93E-04 | 1.71E-03 |
|              |                                       | -     |      |          |          |
|              |                                       | 0.68  |      |          |          |
| 203706_s_at  | FZD7                                  | 3     | 1.61 | 6.02E-08 | 1.96E-06 |
|              |                                       | -     |      |          |          |
|              |                                       | 0.68  |      |          |          |
| 222636_at    | MED28                                 | 4     | 1.61 | 3.67E-06 | 5.12E-05 |
|              |                                       | -     |      |          |          |
|              |                                       | 0.68  |      |          |          |
| 229514_at    | GPATCH2L                              | 4     | 1.61 | 3.40E-05 | 3.04E-04 |
|              |                                       | -     |      |          |          |
|              |                                       | 0.68  |      |          |          |
| 1569353_at   | CCP110                                | 5     | 1.61 | 2.11E-04 | 1.32E-03 |
|              |                                       | -     |      |          |          |
|              |                                       | 0.68  |      |          |          |
| 202889_x_at  | MAP7                                  | 5     | 1.61 | 3.93E-07 | 8.48E-06 |
|              |                                       | -     |      |          |          |
|              |                                       | 0.68  |      |          |          |
| 225142_at    | JHDM1D                                | 5     | 1.61 | 4.01E-06 | 5.51E-05 |
|              |                                       | -     |      |          |          |
|              |                                       | 0.68  |      |          |          |
| 1552365_at   | SCIN                                  | 5     | 1.61 | 4.65E-03 | 1.56E-02 |
|              |                                       | -     |      |          |          |
|              |                                       | 0.68  |      |          |          |
| 226313_at    | C10orf35                              | 5     | 1.61 | 1.67E-08 | 6.83E-07 |
|              |                                       | -     |      |          |          |
|              |                                       | 0.68  |      |          |          |
| 227384_s_at  | LINC00623 /// LOC727820 /// LOC728875 | 5     | 1.61 | 1.73E-03 | 7.00E-03 |
|              |                                       | -     |      |          |          |
|              |                                       | 0.68  |      |          |          |
| 1553672_at   | ENAH                                  | 6     | 1.61 | 1.21E-08 | 5.23E-07 |
|              |                                       | -     |      |          |          |
|              |                                       | 0.68  |      |          |          |
| 233226_at    | PTPN9                                 | 6     | 1.61 | 3.36E-05 | 3.01E-04 |



|              |                      |       |      |          |          |
|--------------|----------------------|-------|------|----------|----------|
|              |                      | 6     |      |          |          |
|              |                      | -     |      |          |          |
| 232613_at    | PBRM1                | 0.68  | -    |          |          |
|              |                      | 7     | 1.61 | 1.48E-04 | 9.98E-04 |
|              |                      | -     |      |          |          |
| 239843_at    | RIT1                 | 0.68  | -    |          |          |
|              |                      | 7     | 1.61 | 1.52E-07 | 4.08E-06 |
|              |                      | -     |      |          |          |
| 219181_at    | LIPG                 | 0.68  | -    |          |          |
|              |                      | 7     | 1.61 | 3.18E-03 | 1.14E-02 |
|              |                      | -     |      |          |          |
| 202723_s_at  | FOXO1                | 0.68  | -    |          |          |
|              |                      | 8     | 1.61 | 3.30E-04 | 1.88E-03 |
|              |                      | -     |      |          |          |
| 202290_at    | PDAP1                | 0.68  | -    |          |          |
|              |                      | 8     | 1.61 | 2.30E-06 | 3.52E-05 |
|              |                      | -     |      |          |          |
| 205543_at    | HSPA4L               | 0.68  | -    |          |          |
|              |                      | 8     | 1.61 | 1.06E-07 | 3.01E-06 |
|              |                      | -     |      |          |          |
| 209307_at    | SWAP70               | 0.68  | -    |          |          |
|              |                      | 9     | 1.61 | 5.83E-06 | 7.40E-05 |
|              |                      | -     |      |          |          |
| 232233_at    | SLC22A16             | 0.68  | -    |          |          |
|              |                      | 9     | 1.61 | 4.06E-08 | 1.41E-06 |
|              |                      | -     |      |          |          |
| 238807_at    | ANKRD46 /// GAPDHP62 | 0.68  | -    |          |          |
|              |                      | 9     | 1.61 | 1.75E-04 | 1.14E-03 |
|              |                      | -     |      |          |          |
| 221693_s_at  | MRPS18A              | 0.68  | -    |          |          |
|              |                      | 9     | 1.61 | 8.88E-03 | 2.61E-02 |
|              |                      | -     |      |          |          |
| 209257_s_at  | SMC3                 | -0.69 | 1.61 | 7.19E-04 | 3.46E-03 |
|              |                      | -     |      |          |          |
| 1553785_at   | RASGEF1B             | -0.69 | 1.61 | 4.41E-04 | 2.36E-03 |
|              |                      | -     |      |          |          |
| 1558719_s_at | RPAIN                | -0.69 | 1.61 | 2.42E-03 | 9.16E-03 |
|              |                      | -     |      |          |          |
| 201487_at    | CTSC                 | -0.69 | 1.61 | 1.24E-05 | 1.36E-04 |
|              |                      | -     |      |          |          |
| 215471_s_at  | MAP7                 | 0.69  | -    |          |          |
|              |                      | 1     | 1.61 | 4.68E-06 | 6.22E-05 |
|              |                      | -     |      |          |          |
| 212629_s_at  | PKN2                 | 0.69  | -    |          |          |
|              |                      | 1     | 1.61 | 6.60E-04 | 3.24E-03 |
|              |                      | -     |      |          |          |
| 200751_s_at  | HNRNPC               | 0.69  | -    |          |          |
|              |                      | 1     | 1.61 | 4.93E-05 | 4.10E-04 |
|              |                      | -     |      |          |          |
| 219330_at    | VANGL1               | 0.69  | -    |          |          |
|              |                      | 1     | 1.61 | 2.79E-07 | 6.55E-06 |
|              |                      | -     |      |          |          |
| 204557_s_at  | DZIP1                | 0.69  | -    |          |          |
|              |                      | 1     | 1.61 | 2.18E-04 | 1.36E-03 |
|              |                      | -     |      |          |          |
| 1559566_at   | FBXO42               | 0.69  | -    |          |          |
|              |                      | 2     | 1.62 | 2.68E-05 | 2.53E-04 |
|              |                      | -     |      |          |          |
| 215434_x_at  | NBPF1                | 0.69  | -    |          |          |
|              |                      | 2     | 1.62 | 3.76E-04 | 2.08E-03 |
|              |                      | -     |      |          |          |
| 1558794_at   | NUTM2A-AS1           | 0.69  | -    |          |          |
|              |                      | 2     | 1.62 | 2.13E-04 | 1.33E-03 |
|              |                      | -     |      |          |          |
| 205586_x_at  | VGFB                 | 0.69  | -    |          |          |
|              |                      | 2     | 1.62 | 1.52E-09 | 9.67E-08 |

|              |                         |      |      |          |          |
|--------------|-------------------------|------|------|----------|----------|
|              |                         |      | -    |          |          |
| 210756_s_at  | NOTCH2                  | 0.69 | -    |          |          |
|              |                         | 4    | 1.62 | 3.64E-04 | 2.03E-03 |
|              |                         | -    |      |          |          |
| 214474_at    | LOC101060511 /// PRKAB2 | 0.69 | -    |          |          |
|              |                         | 5    | 1.62 | 1.58E-03 | 6.49E-03 |
|              |                         | -    |      |          |          |
| 215952_s_at  | OAZ1                    | 0.69 | -    |          |          |
|              |                         | 5    | 1.62 | 8.95E-05 | 6.63E-04 |
|              |                         | -    |      |          |          |
| 1553072_at   | BNIPL                   | 0.69 | -    |          |          |
|              |                         | 5    | 1.62 | 7.76E-05 | 5.91E-04 |
|              |                         | -    |      |          |          |
| 228293_at    | DEPDC7                  | 0.69 | -    |          |          |
|              |                         | 6    | 1.62 | 5.81E-07 | 1.15E-05 |
|              |                         | -    |      |          |          |
| 221579_s_at  | NUDT3 /// RPS10-NUDT3   | 0.69 | -    |          |          |
|              |                         | 6    | 1.62 | 2.37E-05 | 2.29E-04 |
|              |                         | -    |      |          |          |
| 207511_s_at  | CNPPD1                  | 0.69 | -    |          |          |
|              |                         | 6    | 1.62 | 3.31E-07 | 7.43E-06 |
|              |                         | -    |      |          |          |
| 203764_at    | DLGAP5                  | 0.69 | -    |          |          |
|              |                         | 7    | 1.62 | 1.79E-04 | 1.16E-03 |
|              |                         | -    |      |          |          |
| 218192_at    | IP6K2                   | 0.69 | -    |          |          |
|              |                         | 7    | 1.62 | 7.41E-06 | 8.94E-05 |
|              |                         | -    |      |          |          |
| 207826_s_at  | ID3                     | 0.69 | -    |          |          |
|              |                         | 7    | 1.62 | 5.31E-09 | 2.75E-07 |
|              |                         | -    |      |          |          |
| 1552620_at   | SPRR4                   | 0.69 | -    |          |          |
|              |                         | 7    | 1.62 | 3.31E-05 | 2.98E-04 |
|              |                         | -    |      |          |          |
| 203790_s_at  | HRSP12                  | 0.69 | -    |          |          |
|              |                         | 7    | 1.62 | 5.18E-07 | 1.05E-05 |
|              |                         | -    |      |          |          |
| 219858_s_at  | MFSD6                   | 0.69 | -    |          |          |
|              |                         | 7    | 1.62 | 1.42E-03 | 5.98E-03 |
|              |                         | -    |      |          |          |
| 244435_at    | FAM196A                 | 0.69 | -    |          |          |
|              |                         | 7    | 1.62 | 5.65E-05 | 4.57E-04 |
|              |                         | -    |      |          |          |
| 229765_at    | ZNF207                  | 0.69 | -    |          |          |
|              |                         | 8    | 1.62 | 2.63E-03 | 9.80E-03 |
|              |                         | -    |      |          |          |
| 239136_at    | UNC5B-AS1               | 0.69 | -    |          |          |
|              |                         | 8    | 1.62 | 8.84E-03 | 2.60E-02 |
|              |                         | -    |      |          |          |
| 236264_at    | LPHN3                   | 0.69 | -    |          |          |
|              |                         | 9    | 1.62 | 3.06E-05 | 2.80E-04 |
|              |                         | -    |      |          |          |
| 1558577_at   | LOC148709               | 0.69 | -    |          |          |
|              |                         | 9    | 1.62 | 7.65E-09 | 3.67E-07 |
|              |                         | -    |      |          |          |
| 1555334_s_at | SLC30A5                 | 0.69 | -    |          |          |
|              |                         | 9    | 1.62 | 1.43E-06 | 2.40E-05 |
|              |                         | -    |      |          |          |
| 208899_x_at  | ATP6V1D                 | 0.69 | -    |          |          |
|              |                         | 9    | 1.62 | 1.80E-07 | 4.63E-06 |
|              |                         | -    |      |          |          |
| 209890_at    | TSPAN5                  | 0.69 | -    |          |          |
|              |                         | 9    | 1.62 | 1.92E-05 | 1.93E-04 |
|              |                         | -    |      |          |          |
| 230674_at    | LGR4                    | -0.7 | 1.62 | 1.37E-05 | 1.47E-04 |
|              |                         | -    |      |          |          |
| 219367_s_at  | NRP2                    | -0.7 | 1.62 | 1.44E-03 | 6.05E-03 |

|              |                 |      |      |          |          |
|--------------|-----------------|------|------|----------|----------|
| 1568574_x_at | SPP1            | -0.7 | 1.62 | 1.14E-02 | 3.18E-02 |
| 1555401_at   | SOHLH2          | -0.7 | 1.62 | 4.63E-07 | 9.62E-06 |
| 243109_at    | MCTP2           | 0.70 | -    | 5.48E-05 | 4.45E-04 |
| 208633_s_at  | MACF1           | 1    | 1.63 | 3.09E-09 | 1.76E-07 |
| 1552575_a_at | C6orf141        | 0.70 | -    | 2.15E-05 | 2.12E-04 |
| 221234_s_at  | BACH2           | 1    | 1.63 | 3.02E-06 | 4.38E-05 |
| 210020_x_at  | CALML3          | 2    | 1.63 | 5.81E-09 | 2.93E-07 |
| 1559256_at   | MAGI1           | 2    | 1.63 | 5.06E-07 | 1.03E-05 |
| 213476_x_at  | TUBB3           | 2    | 1.63 | 5.31E-10 | 4.13E-08 |
| 201340_s_at  | ENC1            | 2    | 1.63 | 6.17E-08 | 2.00E-06 |
| 238519_at    | DDI2 /// RSC1A1 | 2    | 1.63 | 1.28E-02 | 3.48E-02 |
| 239635_at    | RBM14           | 2    | 1.63 | 8.78E-05 | 6.53E-04 |
| 233539_at    | NAPEPLD         | 3    | 1.63 | 1.92E-04 | 1.22E-03 |
| 235315_at    | TSC22D1         | 3    | 1.63 | 1.09E-05 | 1.22E-04 |
| 242210_at    | ZNF24           | 3    | 1.63 | 8.82E-05 | 6.55E-04 |
| 214036_at    | EFNA5           | 3    | 1.63 | 4.09E-08 | 1.42E-06 |
| 202818_s_at  | TCEB3           | 3    | 1.63 | 3.64E-05 | 3.22E-04 |
| 37950_at     | PREP            | 4    | 1.63 | 5.07E-09 | 2.64E-07 |
| 244118_at    | GABRA1          | 4    | 1.63 | 1.73E-06 | 2.80E-05 |
| 215807_s_at  | PLXNB1          | 4    | 1.63 | 1.19E-04 | 8.36E-04 |
| 212081_x_at  | PRRC2A          | 5    | 1.63 | 7.30E-06 | 8.82E-05 |
| 210317_s_at  | YWHAE           | 6    | 1.63 | 4.24E-04 | 2.29E-03 |
| 212570_at    | ENDOD1          | 6    | 1.63 | 1.28E-04 | 8.88E-04 |

|              |                 |       |      |          |          |
|--------------|-----------------|-------|------|----------|----------|
|              |                 | -     |      |          |          |
|              |                 | 0.70  | -    |          |          |
| 239937_at    | ZNF207          | 7     | 1.63 | 2.51E-04 | 1.51E-03 |
|              |                 | -     |      |          |          |
|              |                 | 0.70  | -    |          |          |
| 1553976_a_at | DPCD            | 8     | 1.63 | 5.02E-06 | 6.57E-05 |
|              |                 | -     |      |          |          |
|              |                 | 0.70  | -    |          |          |
| 226592_at    | ZNF618          | 8     | 1.63 | 3.43E-07 | 7.62E-06 |
|              |                 | -     |      |          |          |
|              |                 | 0.70  | -    |          |          |
| 227313_at    | CNPY4           | 8     | 1.63 | 2.27E-08 | 8.92E-07 |
|              |                 | -     |      |          |          |
|              |                 | 0.70  | -    |          |          |
| 229093_at    | NOS3            | 8     | 1.63 | 1.06E-06 | 1.88E-05 |
|              |                 | -     |      |          |          |
|              |                 | 0.70  | -    |          |          |
| 213887_s_at  | POLR2E          | 9     | 1.63 | 3.86E-07 | 8.38E-06 |
|              |                 | -     |      |          |          |
|              |                 | 0.70  | -    |          |          |
| 240282_at    | WDR1            | 9     | 1.63 | 1.99E-04 | 1.26E-03 |
|              |                 | -     |      |          |          |
|              |                 | 0.70  | -    |          |          |
| 1552496_a_at | COBL            | 9     | 1.64 | 7.04E-05 | 5.45E-04 |
|              |                 | -     |      |          |          |
|              |                 | 0.70  | -    |          |          |
| 203100_s_at  | CDYL            | 9     | 1.64 | 9.14E-05 | 6.75E-04 |
|              |                 | -     |      |          |          |
|              |                 | 0.70  | -    |          |          |
| 201167_x_at  | ARHGDI4         | -0.71 | 1.64 | 1.15E-04 | 8.13E-04 |
|              |                 | -     |      |          |          |
|              |                 | 0.70  | -    |          |          |
| 224602_at    | C4orf3          | -0.71 | 1.64 | 1.45E-05 | 1.53E-04 |
|              |                 | -     |      |          |          |
|              |                 | 0.71  | -    |          |          |
| 212098_at    | MGAT5           | 1     | 1.64 | 5.00E-13 | 1.17E-10 |
|              |                 | -     |      |          |          |
|              |                 | 0.71  | -    |          |          |
| 228553_at    | ENAH            | 2     | 1.64 | 4.29E-05 | 3.67E-04 |
|              |                 | -     |      |          |          |
|              |                 | 0.71  | -    |          |          |
| 222111_at    | FAM63B          | 2     | 1.64 | 9.54E-05 | 6.97E-04 |
|              |                 | -     |      |          |          |
|              |                 | 0.71  | -    |          |          |
| 1564064_a_at | ATP11B          | 2     | 1.64 | 3.66E-06 | 5.11E-05 |
|              |                 | -     |      |          |          |
|              |                 | 0.71  | -    |          |          |
| 231866_at    | LNPEP           | 2     | 1.64 | 7.34E-03 | 2.24E-02 |
|              |                 | -     |      |          |          |
|              |                 | 0.71  | -    |          |          |
| 1555945_s_at | FAM120A         | 3     | 1.64 | 2.22E-05 | 2.18E-04 |
|              |                 | -     |      |          |          |
|              |                 | 0.71  | -    |          |          |
| 223775_at    | HHIP            | 3     | 1.64 | 1.23E-05 | 1.35E-04 |
|              |                 | -     |      |          |          |
|              |                 | 0.71  | -    |          |          |
| 204556_s_at  | DZIP1           | 3     | 1.64 | 3.85E-04 | 2.12E-03 |
|              |                 | -     |      |          |          |
|              |                 | 0.71  | -    |          |          |
| 243835_at    | ZDHHC21         | 3     | 1.64 | 6.53E-06 | 8.05E-05 |
|              |                 | -     |      |          |          |
|              |                 | 0.71  | -    |          |          |
| 205016_at    | TGFA            | 3     | 1.64 | 1.47E-09 | 9.50E-08 |
|              |                 | -     |      |          |          |
|              |                 | 0.71  | -    |          |          |
| 212481_s_at  | TPM4            | 5     | 1.64 | 1.21E-09 | 8.12E-08 |
|              |                 | -     |      |          |          |
|              |                 | 0.71  | -    |          |          |
| 1558093_s_at | MATR3 /// SNHG4 | 5     | 1.64 | 3.59E-04 | 2.00E-03 |

|              |                   |       |      |          |          |
|--------------|-------------------|-------|------|----------|----------|
|              |                   | -     |      |          |          |
| 236621_at    | RPS27             | 0.71  | -    |          |          |
|              |                   | 5     | 1.64 | 1.43E-05 | 1.51E-04 |
|              |                   | -     |      |          |          |
| 243643_x_at  | SLC30A6           | 0.71  | -    |          |          |
|              |                   | 5     | 1.64 | 1.39E-05 | 1.48E-04 |
|              |                   | -     |      |          |          |
| 204256_at    | ELOVL6            | 0.71  | -    |          |          |
|              |                   | 5     | 1.64 | 2.16E-14 | 8.31E-12 |
|              |                   | -     |      |          |          |
| 236402_at    | BRAF              | 0.71  | -    |          |          |
|              |                   | 5     | 1.64 | 3.91E-06 | 5.40E-05 |
|              |                   | -     |      |          |          |
| 223539_s_at  | SERF1A /// SERF1B | 0.71  | -    |          |          |
|              |                   | 5     | 1.64 | 2.82E-05 | 2.62E-04 |
|              |                   | -     |      |          |          |
| 231705_at    | HRSP12            | 0.71  | -    |          |          |
|              |                   | 6     | 1.64 | 1.87E-05 | 1.90E-04 |
|              |                   | -     |      |          |          |
| 202503_s_at  | KIAA0101          | 0.71  | -    |          |          |
|              |                   | 6     | 1.64 | 4.48E-06 | 6.01E-05 |
|              |                   | -     |      |          |          |
| 201109_s_at  | THBS1             | 0.71  | -    |          |          |
|              |                   | 6     | 1.64 | 1.10E-06 | 1.94E-05 |
|              |                   | -     |      |          |          |
| 1556021_at   | GPR180            | 0.71  | -    |          |          |
|              |                   | 7     | 1.64 | 5.92E-04 | 2.97E-03 |
|              |                   | -     |      |          |          |
| 229274_at    | GNAS              | 0.71  | -    |          |          |
|              |                   | 7     | 1.64 | 4.89E-04 | 2.56E-03 |
|              |                   | -     |      |          |          |
| 202316_x_at  | UBE4B             | 0.71  | -    |          |          |
|              |                   | 7     | 1.64 | 1.43E-04 | 9.69E-04 |
|              |                   | -     |      |          |          |
| 234321_x_at  | NHSL1             | 0.71  | -    |          |          |
|              |                   | 8     | 1.64 | 5.55E-12 | 9.04E-10 |
|              |                   | -     |      |          |          |
| 229574_at    | TRA2A             | 0.71  | -    |          |          |
|              |                   | 8     | 1.64 | 6.50E-03 | 2.03E-02 |
|              |                   | -     |      |          |          |
| 238594_x_at  | DUSP8             | 0.71  | -    |          |          |
|              |                   | 8     | 1.64 | 2.04E-04 | 1.28E-03 |
|              |                   | -     |      |          |          |
| 1558378_a_at | AHNAK2            | 0.71  | -    |          |          |
|              |                   | 8     | 1.65 | 1.26E-02 | 3.46E-02 |
|              |                   | -     |      |          |          |
| 212365_at    | MYO1B             | 0.71  | -    |          |          |
|              |                   | 8     | 1.65 | 7.67E-08 | 2.36E-06 |
|              |                   | -     |      |          |          |
| 213087_s_at  | EEF1D             | 0.71  | -    |          |          |
|              |                   | 9     | 1.65 | 5.30E-04 | 2.72E-03 |
|              |                   | -     |      |          |          |
| 1565716_at   | FUS               | -0.72 | 1.65 | 6.57E-04 | 3.23E-03 |
|              |                   | -     |      |          |          |
| 237333_at    | RBBP4             | -0.72 | 1.65 | 7.79E-03 | 2.36E-02 |
|              |                   | -     |      |          |          |
| 201521_s_at  | NCBP2             | -0.72 | 1.65 | 1.30E-08 | 5.52E-07 |
|              |                   | -     |      |          |          |
| 238621_at    | FMN1              | 0.72  | -    |          |          |
|              |                   | 1     | 1.65 | 3.10E-05 | 2.83E-04 |
|              |                   | -     |      |          |          |
| 240868_at    | LOC100129406      | 0.72  | -    |          |          |
|              |                   | 2     | 1.65 | 4.53E-04 | 2.41E-03 |
|              |                   | -     |      |          |          |
| 215547_at    | TSC22D2           | 0.72  | -    |          |          |
|              |                   | 2     | 1.65 | 1.41E-08 | 5.94E-07 |

|              |                     |       |      |          |          |  |
|--------------|---------------------|-------|------|----------|----------|--|
|              |                     |       | -    |          |          |  |
|              |                     | 0.72  | -    |          |          |  |
| 223821_s_at  | SUSD4               | 4     | 1.65 | 6.87E-05 | 5.33E-04 |  |
|              |                     | -     |      |          |          |  |
|              |                     | 0.72  | -    |          |          |  |
| 1559174_at   | RAB6A               | 4     | 1.65 | 6.48E-05 | 5.09E-04 |  |
|              |                     | -     |      |          |          |  |
|              |                     | 0.72  | -    |          |          |  |
| 1553226_at   | LINC00052           | 5     | 1.65 | 3.24E-05 | 2.93E-04 |  |
|              |                     | -     |      |          |          |  |
|              |                     | 0.72  | -    |          |          |  |
| 209193_at    | PIM1                | 5     | 1.65 | 2.26E-07 | 5.59E-06 |  |
|              |                     | -     |      |          |          |  |
|              |                     | 0.72  | -    |          |          |  |
| 229770_at    | GLT1D1              | 6     | 1.65 | 4.28E-05 | 3.67E-04 |  |
|              |                     | -     |      |          |          |  |
|              |                     | 0.72  | -    |          |          |  |
| 209162_s_at  | PRPF4               | 7     | 1.66 | 1.52E-06 | 2.51E-05 |  |
|              |                     | -     |      |          |          |  |
|              |                     | 0.72  | -    |          |          |  |
| 210186_s_at  | FKBP1A              | 8     | 1.66 | 1.63E-05 | 1.69E-04 |  |
|              |                     | -     |      |          |          |  |
|              |                     | 0.72  | -    |          |          |  |
| 1553352_x_at | ERVW-1              | 8     | 1.66 | 1.91E-09 | 1.19E-07 |  |
|              |                     | -     |      |          |          |  |
|              |                     | 0.72  | -    |          |          |  |
| 226817_at    | DSC2                | 9     | 1.66 | 6.54E-10 | 4.98E-08 |  |
|              |                     | -     |      |          |          |  |
|              |                     | 0.72  | -    |          |          |  |
| 234418_x_at  | CD44                | 9     | 1.66 | 3.01E-06 | 4.38E-05 |  |
|              |                     | -     |      |          |          |  |
|              |                     | -0.73 | 1.66 | 1.45E-03 | 6.08E-03 |  |
| 216554_s_at  | ENO1                |       |      |          |          |  |
|              |                     | -     |      |          |          |  |
|              |                     | -0.73 | 1.66 | 2.37E-06 | 3.61E-05 |  |
| 226905_at    | FAM101B             |       |      |          |          |  |
|              |                     | -     |      |          |          |  |
|              |                     | -0.73 | 1.66 | 1.12E-04 | 7.98E-04 |  |
| 201291_s_at  | TOP2A               |       |      |          |          |  |
|              |                     | -     |      |          |          |  |
|              |                     | -0.73 | 1.66 | 1.28E-04 | 8.90E-04 |  |
| 221499_s_at  | STX16               |       |      |          |          |  |
|              |                     | -     |      |          |          |  |
|              |                     | 0.73  | -    |          |          |  |
| 200054_at    | ZNF259              | 1     | 1.66 | 2.41E-12 | 4.41E-10 |  |
|              |                     | -     |      |          |          |  |
|              |                     | 0.73  | -    |          |          |  |
| 212095_s_at  | MTUS1               | 1     | 1.66 | 1.27E-04 | 8.85E-04 |  |
|              |                     | -     |      |          |          |  |
|              |                     | 0.73  | -    |          |          |  |
| 212364_at    | MYO1B               | 2     | 1.66 | 2.74E-06 | 4.07E-05 |  |
|              |                     | -     |      |          |          |  |
|              |                     | 0.73  | -    |          |          |  |
| 227602_at    | RAB7A               | 4     | 1.66 | 4.09E-04 | 2.22E-03 |  |
|              |                     | -     |      |          |          |  |
|              |                     | 0.73  | -    |          |          |  |
| 228485_s_at  | SLC44A1             | 4     | 1.66 | 2.08E-06 | 3.24E-05 |  |
|              |                     | -     |      |          |          |  |
|              |                     | 0.73  | -    |          |          |  |
| 201075_s_at  | SMARCC1             | 4     | 1.66 | 3.07E-06 | 4.44E-05 |  |
|              |                     | -     |      |          |          |  |
|              |                     | 0.73  | -    |          |          |  |
| 202936_s_at  | SOX9                | 5     | 1.66 | 1.57E-07 | 4.17E-06 |  |
|              |                     | -     |      |          |          |  |
|              |                     | 0.73  | -    |          |          |  |
| 232498_at    | LOC377711 /// MROH1 | 5     | 1.66 | 5.76E-04 | 2.91E-03 |  |
|              |                     | -     |      |          |          |  |
|              |                     | 0.73  | -    |          |          |  |
| 214297_at    | CSPG4               | 6     | 1.66 | 1.24E-03 | 5.38E-03 |  |
|              |                     | -     |      |          |          |  |
|              |                     | 0.73  | 1.67 | 1.36E-03 | 5.80E-03 |  |
| 223254_s_at  | G2E3                |       |      |          |          |  |

|              |                                                   |       |      |          |          |
|--------------|---------------------------------------------------|-------|------|----------|----------|
|              |                                                   | 7     |      |          |          |
|              |                                                   | -     |      |          |          |
| 209344_at    | TPM4                                              | 0.73  | -    |          |          |
|              |                                                   | 7     | 1.67 | 7.92E-07 | 1.49E-05 |
|              |                                                   | -     |      |          |          |
| 238346_s_at  | TGS1                                              | 0.73  | -    |          |          |
|              |                                                   | 7     | 1.67 | 1.19E-04 | 8.38E-04 |
|              |                                                   | -     |      |          |          |
| 209589_s_at  | EPHB2                                             | 0.73  | -    |          |          |
|              |                                                   | 7     | 1.67 | 7.06E-07 | 1.35E-05 |
|              |                                                   | -     |      |          |          |
| 220011_at    | AUNIP                                             | 0.73  | -    |          |          |
|              |                                                   | 8     | 1.67 | 3.82E-05 | 3.34E-04 |
|              |                                                   | -     |      |          |          |
| 218916_at    | ZNF768                                            | 0.73  | -    |          |          |
|              |                                                   | 8     | 1.67 | 2.23E-06 | 3.44E-05 |
|              |                                                   | -     |      |          |          |
| 203935_at    | ACVR1                                             | 0.73  | -    |          |          |
|              |                                                   | 9     | 1.67 | 1.28E-08 | 5.47E-07 |
|              |                                                   | -     |      |          |          |
| 213033_s_at  | NFIB                                              | -0.74 | 1.67 | 5.78E-04 | 2.92E-03 |
|              |                                                   | -     |      |          |          |
| 220977_x_at  | EPB41L5                                           | -0.74 | 1.67 | 2.26E-05 | 2.21E-04 |
|              | CBWD1 /// CBWD3 /// CBWD5 /// CBWD6 /// CBWD7 /// | -     |      |          |          |
| 226193_x_at  | LOC100653334 /// LOC101060578                     | -0.74 | 1.67 | 2.85E-06 | 4.19E-05 |
|              |                                                   | -     |      |          |          |
| 1556425_a_at | LOC284219                                         | -0.74 | 1.67 | 5.57E-09 | 2.85E-07 |
|              |                                                   | -     |      |          |          |
| 205990_s_at  | WNT5A                                             | 0.74  | -    |          |          |
|              |                                                   | 1     | 1.67 | 2.99E-08 | 1.12E-06 |
|              |                                                   | -     |      |          |          |
| 224940_s_at  | PAPPA                                             | 0.74  | -    |          |          |
|              |                                                   | 1     | 1.67 | 2.05E-05 | 2.03E-04 |
|              |                                                   | -     |      |          |          |
| 202272_s_at  | FBXO28                                            | 0.74  | -    |          |          |
|              |                                                   | 2     | 1.67 | 2.90E-08 | 1.09E-06 |
|              |                                                   | -     |      |          |          |
| 232112_at    | RALGPS2                                           | 0.74  | -    |          |          |
|              |                                                   | 2     | 1.67 | 4.53E-08 | 1.54E-06 |
|              |                                                   | -     |      |          |          |
| 214446_at    | ELL2                                              | 0.74  | -    |          |          |
|              |                                                   | 2     | 1.67 | 1.51E-06 | 2.51E-05 |
|              |                                                   | -     |      |          |          |
| 227510_x_at  | MALAT1                                            | 0.74  | -    |          |          |
|              |                                                   | 2     | 1.67 | 2.29E-07 | 5.63E-06 |
|              |                                                   | -     |      |          |          |
| 202458_at    | PRSS23                                            | 0.74  | -    |          |          |
|              |                                                   | 2     | 1.67 | 2.37E-07 | 5.78E-06 |
|              |                                                   | -     |      |          |          |
| 201617_x_at  | CALD1                                             | 0.74  | -    |          |          |
|              |                                                   | 3     | 1.67 | 1.98E-06 | 3.12E-05 |
|              |                                                   | -     |      |          |          |
| 200604_s_at  | PRKAR1A                                           | 0.74  | -    |          |          |
|              |                                                   | 4     | 1.67 | 2.77E-06 | 4.10E-05 |
|              |                                                   | -     |      |          |          |
| 201860_s_at  | PLAT                                              | 0.74  | -    |          |          |
|              |                                                   | 4     | 1.67 | 1.23E-05 | 1.35E-04 |
|              |                                                   | -     |      |          |          |
| 225647_s_at  | CTSC                                              | 0.74  | -    |          |          |
|              |                                                   | 5     | 1.68 | 1.22E-05 | 1.34E-04 |
|              |                                                   | -     |      |          |          |
| 212022_s_at  | MKI67                                             | 0.74  | -    |          |          |
|              |                                                   | 5     | 1.68 | 7.77E-06 | 9.29E-05 |
|              |                                                   | -     |      |          |          |
| 37408_at     | MRC2                                              | 0.74  | -    |          |          |
|              |                                                   | 5     | 1.68 | 1.74E-09 | 1.10E-07 |

|             |          |       |      |          |          |
|-------------|----------|-------|------|----------|----------|
|             |          | -     |      |          |          |
| 222311_s_at | SCAF4    | 0.74  | -    |          |          |
|             |          | 6     | 1.68 | 4.47E-05 | 3.79E-04 |
|             |          | -     |      |          |          |
| 242786_at   | SBF2-AS1 | 0.74  | -    |          |          |
|             |          | 6     | 1.68 | 1.61E-06 | 2.63E-05 |
|             |          | -     |      |          |          |
| 208002_s_at | ACOT7    | 0.74  | -    |          |          |
|             |          | 6     | 1.68 | 1.63E-11 | 2.24E-09 |
|             |          | -     |      |          |          |
| 201793_x_at | SMG7     | 0.74  | -    |          |          |
|             |          | 6     | 1.68 | 3.41E-05 | 3.04E-04 |
|             |          | -     |      |          |          |
| 222372_at   | MAGI1    | 0.74  | -    |          |          |
|             |          | 7     | 1.68 | 3.99E-04 | 2.18E-03 |
|             |          | -     |      |          |          |
| 238929_at   | SRSF8    | 0.74  | -    |          |          |
|             |          | 8     | 1.68 | 4.01E-06 | 5.51E-05 |
|             |          | -     |      |          |          |
| 213439_x_at | RUNDC3A  | 0.74  | -    |          |          |
|             |          | 8     | 1.68 | 3.53E-08 | 1.27E-06 |
|             |          | -     |      |          |          |
| 205732_s_at | NCOA2    | 0.74  | -    |          |          |
|             |          | 8     | 1.68 | 1.13E-05 | 1.26E-04 |
|             |          | -     |      |          |          |
| 220317_at   | LRAT     | 0.74  | -    |          |          |
|             |          | 9     | 1.68 | 5.08E-07 | 1.03E-05 |
|             |          | -     |      |          |          |
| 239043_at   | ZNF404   | 0.74  | -    |          |          |
|             |          | 9     | 1.68 | 1.96E-04 | 1.24E-03 |
|             |          | -     |      |          |          |
| 237106_at   | SLC11A2  | -0.75 | 1.68 | 8.41E-05 | 6.31E-04 |
|             |          | -     |      |          |          |
| 205007_s_at | CIB2     | -0.75 | 1.68 | 3.84E-08 | 1.35E-06 |
|             |          | -     |      |          |          |
| 215139_at   | ARHGEF10 | -0.75 | 1.68 | 3.82E-05 | 3.34E-04 |
|             |          | -     |      |          |          |
| 237968_at   | ATL2     | -0.75 | 1.68 | 1.33E-05 | 1.43E-04 |
|             |          | -     |      |          |          |
| 215195_at   | PRKCA    | -0.75 | 1.68 | 6.99E-05 | 5.41E-04 |
|             |          | -     |      |          |          |
| 220512_at   | DLC1     | -0.75 | 1.68 | 5.39E-04 | 2.76E-03 |
|             |          | -     |      |          |          |
| 220482_s_at | SERGEF   | 0.75  | -    |          |          |
|             |          | 2     | 1.68 | 5.68E-05 | 4.59E-04 |
|             |          | -     |      |          |          |
| 220613_s_at | SYTL2    | 0.75  | -    |          |          |
|             |          | 2     | 1.68 | 3.39E-10 | 2.85E-08 |
|             |          | -     |      |          |          |
| 215443_at   | TSHR     | 0.75  | -    |          |          |
|             |          | 2     | 1.68 | 6.49E-05 | 5.10E-04 |
|             |          | -     |      |          |          |
| 229518_at   | FAM46B   | 0.75  | -    |          |          |
|             |          | 4     | 1.69 | 3.22E-10 | 2.75E-08 |
|             |          | -     |      |          |          |
| 227173_s_at | BACH2    | 0.75  | -    |          |          |
|             |          | 4     | 1.69 | 6.52E-06 | 8.04E-05 |
|             |          | -     |      |          |          |
| 205687_at   | UBFD1    | 0.75  | -    |          |          |
|             |          | 4     | 1.69 | 1.51E-07 | 4.04E-06 |
|             |          | -     |      |          |          |
| 202066_at   | PPFIA1   | 0.75  | -    |          |          |
|             |          | 4     | 1.69 | 3.15E-13 | 7.88E-11 |
|             |          | -     |      |          |          |
| 1560172_at  | INTS10   | 0.75  | -    |          |          |
|             |          | 4     | 1.69 | 1.17E-03 | 5.13E-03 |



|              |                |       |      |          |          |
|--------------|----------------|-------|------|----------|----------|
|              |                | -     |      |          |          |
| 1564383_s_at | FLJ35934       | 0.75  | -    |          |          |
|              |                | 4     | 1.69 | 8.87E-04 | 4.10E-03 |
|              |                | -     |      |          |          |
| 226069_at    | PRICKLE1       | 0.75  | -    |          |          |
|              |                | 5     | 1.69 | 1.89E-07 | 4.81E-06 |
|              |                | -     |      |          |          |
| 207112_s_at  | GAB1           | 0.75  | -    |          |          |
|              |                | 5     | 1.69 | 1.19E-08 | 5.18E-07 |
|              |                | -     |      |          |          |
| 226494_at    | CAMSAP3        | 0.75  | -    |          |          |
|              |                | 7     | 1.69 | 7.25E-07 | 1.39E-05 |
|              |                | -     |      |          |          |
| 211793_s_at  | ABI2           | 0.75  | -    |          |          |
|              |                | 7     | 1.69 | 9.15E-11 | 9.55E-09 |
|              |                | -     |      |          |          |
| 1561030_at   | TMC7           | 0.75  | -    |          |          |
|              |                | 8     | 1.69 | 9.41E-05 | 6.89E-04 |
|              |                | -     |      |          |          |
| 242422_at    | G3BP1          | 0.75  | -    |          |          |
|              |                | 8     | 1.69 | 9.71E-04 | 4.42E-03 |
|              |                | -     |      |          |          |
| 1555460_a_at | SLC39A6        | 0.75  | -    |          |          |
|              |                | 8     | 1.69 | 2.23E-05 | 2.19E-04 |
|              |                | -     |      |          |          |
| 211160_x_at  | ACTN1          | 0.75  | -    |          |          |
|              |                | 8     | 1.69 | 1.72E-06 | 2.78E-05 |
|              |                | -     |      |          |          |
| 222386_s_at  | COPZ1          | 0.75  | -    |          |          |
|              |                | 8     | 1.69 | 1.64E-08 | 6.74E-07 |
|              |                | -     |      |          |          |
| 204148_s_at  | POMZP3 /// ZP3 | 0.75  | -    |          |          |
|              |                | 9     | 1.69 | 7.50E-04 | 3.58E-03 |
|              |                | -     |      |          |          |
| 205472_s_at  | DACH1          | 0.75  | -    |          |          |
|              |                | 9     | 1.69 | 4.18E-05 | 3.60E-04 |
|              |                | -     |      |          |          |
| 219916_s_at  | RNF39          | 0.75  | -    |          |          |
|              |                | 9     | 1.69 | 8.33E-10 | 5.98E-08 |
|              |                | -     |      |          |          |
| 206008_at    | TGM1           | -0.76 | 1.69 | 1.95E-06 | 3.08E-05 |
|              |                | -     |      |          |          |
| 219229_at    | SLCO3A1        | -0.76 | 1.69 | 3.79E-10 | 3.14E-08 |
|              |                | -     |      |          |          |
| 213423_x_at  | TUSC3          | 0.76  | -    |          |          |
|              |                | 1     | 1.69 | 2.54E-05 | 2.42E-04 |
|              |                | -     |      |          |          |
| 1566538_at   | MAGI1          | 0.76  | -    |          |          |
|              |                | 1     | -1.7 | 1.58E-05 | 1.65E-04 |
|              |                | -     |      |          |          |
| 232350_x_at  | GPR161         | 0.76  | -    |          |          |
|              |                | 2     | -1.7 | 2.32E-10 | 2.07E-08 |
|              |                | -     |      |          |          |
| 205948_at    | PTPRT          | 0.76  | -    |          |          |
|              |                | 2     | -1.7 | 7.83E-04 | 3.71E-03 |
|              |                | -     |      |          |          |
| 243361_at    | SREK1          | 0.76  | -    |          |          |
|              |                | 3     | -1.7 | 8.26E-04 | 3.87E-03 |
|              |                | -     |      |          |          |
| 213406_at    | WSB1           | 0.76  | -    |          |          |
|              |                | 4     | -1.7 | 2.36E-05 | 2.29E-04 |
|              |                | -     |      |          |          |
| 231548_at    | FOXO3          | 0.76  | -    |          |          |
|              |                | 5     | -1.7 | 4.41E-05 | 3.75E-04 |
|              |                | -     |      |          |          |
| 209118_s_at  | TUBA1A         | 0.76  | -    |          |          |
|              |                | 6     | -1.7 | 3.77E-11 | 4.45E-09 |

|             |                           |       |      |          |          |  |
|-------------|---------------------------|-------|------|----------|----------|--|
|             |                           |       | -    |          |          |  |
|             |                           | 0.76  |      |          |          |  |
| 229004_at   | ADAMTS15                  | 6     | -1.7 | 8.87E-05 | 6.58E-04 |  |
|             |                           | -     |      |          |          |  |
|             |                           | 0.76  |      |          |          |  |
| 224754_at   | SP1                       | 7     | -1.7 | 1.84E-03 | 7.33E-03 |  |
|             |                           | -     |      |          |          |  |
|             |                           | 0.76  |      |          |          |  |
| 220203_at   | BMP8A                     | 8     | -1.7 | 5.91E-09 | 2.98E-07 |  |
|             |                           | -     |      |          |          |  |
|             |                           | 0.76  |      |          |          |  |
| 230229_at   | DLG1                      | 8     | -1.7 | 1.01E-05 | 1.15E-04 |  |
|             |                           | -     |      |          |          |  |
|             |                           | 0.76  |      |          |          |  |
| 230708_at   | PRICKLE1                  | 8     | -1.7 | 2.89E-07 | 6.74E-06 |  |
|             |                           | -     |      |          |          |  |
|             |                           | 0.76  |      |          |          |  |
| 218834_s_at | TMEM132A                  | 8     | -1.7 | 5.15E-07 | 1.04E-05 |  |
|             |                           | -     |      |          |          |  |
|             |                           | 0.76  |      |          |          |  |
| 231907_at   | ABL2                      | 9     | -1.7 | 3.90E-03 | 1.35E-02 |  |
|             |                           | -     |      |          |          |  |
|             |                           | 0.76  |      |          |          |  |
| 220431_at   | TMPRSS11E                 | 9     | -1.7 | 3.53E-03 | 1.24E-02 |  |
|             |                           | -     |      |          |          |  |
|             |                           | 0.76  |      |          |          |  |
| 200622_x_at | CALM1 /// CALM2 /// CALM3 | 9     | -1.7 | 3.44E-06 | 4.86E-05 |  |
| 202207_at   | ARL4C                     | -0.77 | -1.7 | 1.52E-08 | 6.30E-07 |  |
|             |                           | -     |      |          |          |  |
| 208719_s_at | DDX17                     | -0.77 | 1.71 | 1.74E-06 | 2.81E-05 |  |
|             |                           | -     |      |          |          |  |
|             |                           | 0.77  |      |          |          |  |
| 227300_at   | TMEM119                   | 1     | 1.71 | 9.30E-05 | 6.83E-04 |  |
|             |                           | -     |      |          |          |  |
|             |                           | 0.77  |      |          |          |  |
| 219341_at   | CLN8                      | 1     | 1.71 | 3.20E-05 | 2.90E-04 |  |
|             |                           | -     |      |          |          |  |
|             |                           | 0.77  |      |          |          |  |
| 207764_s_at | HIPK3                     | 2     | 1.71 | 3.27E-08 | 1.19E-06 |  |
|             |                           | -     |      |          |          |  |
|             |                           | 0.77  |      |          |          |  |
| 201861_s_at | LRRFIP1                   | 3     | 1.71 | 7.73E-05 | 5.89E-04 |  |
|             |                           | -     |      |          |          |  |
|             |                           | 0.77  |      |          |          |  |
| 201229_s_at | ARIH2                     | 3     | 1.71 | 2.89E-05 | 2.68E-04 |  |
|             |                           | -     |      |          |          |  |
|             |                           | 0.77  |      |          |          |  |
| 228527_s_at | SLC25A37                  | 3     | 1.71 | 1.37E-07 | 3.75E-06 |  |
|             |                           | -     |      |          |          |  |
|             |                           | 0.77  |      |          |          |  |
| 226899_at   | UNC5B                     | 5     | 1.71 | 1.96E-06 | 3.08E-05 |  |
|             |                           | -     |      |          |          |  |
|             |                           | 0.77  |      |          |          |  |
| 242021_at   | XBP1                      | 6     | 1.71 | 2.37E-06 | 3.60E-05 |  |
|             |                           | -     |      |          |          |  |
|             |                           | 0.77  |      |          |          |  |
| 37425_g_at  | CCHCR1                    | 6     | 1.71 | 7.61E-08 | 2.35E-06 |  |
|             |                           | -     |      |          |          |  |
|             |                           | 0.77  |      |          |          |  |
| 222927_s_at | CPLX3                     | 7     | 1.71 | 3.89E-09 | 2.12E-07 |  |
|             |                           | -     |      |          |          |  |
|             |                           | 0.77  |      |          |          |  |
| 1569053_at  | AP3M2                     | 7     | 1.71 | 1.26E-04 | 8.80E-04 |  |
|             |                           | -     |      |          |          |  |
|             |                           | 0.77  |      |          |          |  |
| 232348_at   | C18orf8                   | 7     | 1.71 | 3.35E-10 | 2.83E-08 |  |

|              |          |       |      |          |          |
|--------------|----------|-------|------|----------|----------|
|              |          | -     |      |          |          |
| 220021_at    | TMC7     | 0.77  | -    |          |          |
|              |          | 7     | 1.71 | 1.33E-07 | 3.65E-06 |
|              |          | -     |      |          |          |
| 208932_at    | PPP4C    | 0.77  | -    |          |          |
|              |          | 8     | 1.71 | 5.18E-04 | 2.67E-03 |
|              |          | -     |      |          |          |
| 242583_at    | STON2    | 0.77  | -    |          |          |
|              |          | 8     | 1.71 | 1.04E-06 | 1.85E-05 |
|              |          | -     |      |          |          |
| 212468_at    | SPAG9    | 0.77  | -    |          |          |
|              |          | 9     | 1.72 | 4.85E-03 | 1.61E-02 |
|              |          | -     |      |          |          |
| 238028_at    | C6orf132 | 0.77  | -    |          |          |
|              |          | 9     | 1.72 | 6.04E-07 | 1.19E-05 |
|              |          | -     |      |          |          |
| 1556037_s_at | HHIP     | 0.77  | -    |          |          |
|              |          | 9     | 1.72 | 4.32E-06 | 5.85E-05 |
|              |          | -     |      |          |          |
| 205139_s_at  | UST      | -0.78 | 1.72 | 5.51E-11 | 6.07E-09 |
|              |          | -     |      |          |          |
| 204173_at    | MYL6B    | -0.78 | 1.72 | 2.51E-07 | 6.02E-06 |
|              |          | -     |      |          |          |
| 218113_at    | TMEM2    | -0.78 | 1.72 | 3.01E-09 | 1.73E-07 |
|              |          | -     |      |          |          |
| 232705_at    | LRRFIP2  | 0.78  | -    |          |          |
|              |          | 1     | 1.72 | 1.26E-03 | 5.44E-03 |
|              |          | -     |      |          |          |
| 208653_s_at  | CD164    | 0.78  | -    |          |          |
|              |          | 1     | 1.72 | 9.12E-07 | 1.66E-05 |
|              |          | -     |      |          |          |
| 205195_at    | AP1S1    | 0.78  | -    |          |          |
|              |          | 1     | 1.72 | 2.10E-05 | 2.08E-04 |
|              |          | -     |      |          |          |
| 202391_at    | BASP1    | 0.78  | -    |          |          |
|              |          | 2     | 1.72 | 3.16E-09 | 1.78E-07 |
|              |          | -     |      |          |          |
| 213606_s_at  | ARHGDI A | 0.78  | -    |          |          |
|              |          | 2     | 1.72 | 5.83E-05 | 4.67E-04 |
|              |          | -     |      |          |          |
| 227953_at    | CMTM6    | 0.78  | -    |          |          |
|              |          | 3     | 1.72 | 5.90E-05 | 4.72E-04 |
|              |          | -     |      |          |          |
| 1559964_at   | FLJ38717 | 0.78  | -    |          |          |
|              |          | 3     | 1.72 | 8.86E-04 | 4.10E-03 |
|              |          | -     |      |          |          |
| 230976_at    | AK8      | 0.78  | -    |          |          |
|              |          | 3     | 1.72 | 2.21E-04 | 1.37E-03 |
|              |          | -     |      |          |          |
| 228699_at    | NRP2     | 0.78  | -    |          |          |
|              |          | 3     | 1.72 | 1.42E-06 | 2.39E-05 |
|              |          | -     |      |          |          |
| 1562271_x_at | ARHGEF7  | 0.78  | -    |          |          |
|              |          | 3     | 1.72 | 9.34E-04 | 4.28E-03 |
|              |          | -     |      |          |          |
| 206605_at    | ENDOU    | 0.78  | -    |          |          |
|              |          | 3     | 1.72 | 9.51E-10 | 6.60E-08 |
|              |          | -     |      |          |          |
| 214359_s_at  | HSP90AB1 | 0.78  | -    |          |          |
|              |          | 4     | 1.72 | 1.86E-03 | 7.42E-03 |
|              |          | -     |      |          |          |
| 209882_at    | RIT1     | 0.78  | -    |          |          |
|              |          | 4     | 1.72 | 8.65E-07 | 1.59E-05 |
|              |          | -     |      |          |          |
| 209198_s_at  | SYT11    | 0.78  | -    |          |          |
|              |          | 5     | 1.72 | 2.96E-04 | 1.72E-03 |

|             |                         |       |      |          |          |  |
|-------------|-------------------------|-------|------|----------|----------|--|
|             |                         |       | -    |          |          |  |
|             |                         | 0.78  | -    |          |          |  |
| 215269_at   | TRAPPC10                | 5     | 1.72 | 5.73E-05 | 4.62E-04 |  |
|             |                         | -     |      |          |          |  |
|             |                         | 0.78  | -    |          |          |  |
| 213577_at   | SQLE                    | 6     | 1.72 | 1.46E-05 | 1.54E-04 |  |
|             |                         | -     |      |          |          |  |
|             |                         | 0.78  | -    |          |          |  |
| 243759_at   | SCAF4                   | 7     | 1.73 | 1.89E-02 | 4.78E-02 |  |
|             |                         | -     |      |          |          |  |
|             |                         | 0.78  | -    |          |          |  |
| 1557384_at  | LOC100506639 /// ZNF131 | 7     | 1.73 | 1.39E-03 | 5.88E-03 |  |
|             |                         | -     |      |          |          |  |
|             |                         | 0.78  | -    |          |          |  |
| 233203_at   | ROPN1                   | 8     | 1.73 | 2.40E-04 | 1.46E-03 |  |
|             |                         | -     |      |          |          |  |
|             |                         | 0.78  | -    |          |          |  |
| 222528_s_at | SLC25A37                | 8     | 1.73 | 6.73E-07 | 1.30E-05 |  |
|             |                         | -     |      |          |          |  |
|             |                         | 0.78  | -    |          |          |  |
| 212841_s_at | PPFIBP2                 | 8     | 1.73 | 2.08E-11 | 2.79E-09 |  |
|             |                         | -     |      |          |          |  |
|             |                         | 0.78  | -    |          |          |  |
| 231403_at   | TRIO                    | 8     | 1.73 | 1.06E-04 | 7.60E-04 |  |
|             |                         | -     |      |          |          |  |
|             |                         | 0.78  | -    |          |          |  |
| 219687_at   | HHAT                    | 8     | 1.73 | 2.39E-11 | 3.09E-09 |  |
|             |                         | -     |      |          |          |  |
|             |                         | 0.78  | -    |          |          |  |
| 209078_s_at | TXN2                    | 8     | 1.73 | 4.08E-05 | 3.54E-04 |  |
|             |                         | -     |      |          |          |  |
|             |                         | 0.78  | -    |          |          |  |
| 229694_at   | WDR11                   | 8     | 1.73 | 8.84E-03 | 2.60E-02 |  |
|             |                         | -     |      |          |          |  |
|             |                         | 0.78  | -    |          |          |  |
| 1553749_at  | FAM76B                  | 9     | 1.73 | 1.95E-04 | 1.24E-03 |  |
|             |                         | -     |      |          |          |  |
|             |                         | 0.78  | -    |          |          |  |
| 202345_s_at | FABP5 /// LOC101060453  | 9     | 1.73 | 8.96E-10 | 6.32E-08 |  |
|             |                         | -     |      |          |          |  |
|             |                         | 0.78  | -    |          |          |  |
| 225478_at   | MFHAS1                  | 9     | 1.73 | 9.91E-12 | 1.47E-09 |  |
|             |                         | -     |      |          |          |  |
|             |                         | 0.78  | -    |          |          |  |
| 219987_at   | ERVMER34-1              | 9     | 1.73 | 3.68E-05 | 3.24E-04 |  |
|             |                         | -     |      |          |          |  |
|             |                         | 0.78  | -    |          |          |  |
| 235095_at   | CCDC64B                 | 9     | 1.73 | 2.74E-07 | 6.45E-06 |  |
|             |                         | -     |      |          |          |  |
|             |                         | 0.78  | -    |          |          |  |
| 201072_s_at | SMARCC1                 | 9     | 1.73 | 9.50E-05 | 6.94E-04 |  |
|             |                         | -     |      |          |          |  |
|             |                         | 0.78  | -    |          |          |  |
| 243318_at   | DCAF8                   | -0.79 | 1.73 | 2.45E-04 | 1.48E-03 |  |
|             |                         | -     |      |          |          |  |
|             |                         | 0.78  | -    |          |          |  |
| 213517_at   | PCBP2                   | -0.79 | 1.73 | 1.58E-06 | 2.60E-05 |  |
|             |                         | -     |      |          |          |  |
|             |                         | 0.78  | -    |          |          |  |
| 210929_s_at | AHSG                    | -0.79 | 1.73 | 1.87E-07 | 4.78E-06 |  |
|             |                         | -     |      |          |          |  |
|             |                         | 0.79  | -    |          |          |  |
| 229817_at   | ZNF608                  | 1     | 1.73 | 2.65E-07 | 6.28E-06 |  |
|             |                         | -     |      |          |          |  |
|             |                         | 0.79  | -    |          |          |  |
| 236371_s_at | TGS1                    | 2     | 1.73 | 3.01E-04 | 1.75E-03 |  |
|             |                         | -     |      |          |          |  |
|             |                         | 0.79  | -    |          |          |  |
| 238449_at   | LOC595101               | 3     | 1.73 | 1.13E-03 | 4.98E-03 |  |

|              |           |                                                    |             |      |          |          |
|--------------|-----------|----------------------------------------------------|-------------|------|----------|----------|
|              |           |                                                    | 0.79        | -    |          |          |
| 235977_at    | LONRF2    |                                                    | 3           | 1.73 | 8.56E-06 | 1.01E-04 |
|              |           |                                                    | -           |      |          |          |
|              |           |                                                    | 0.79        | -    |          |          |
| 232304_at    | PEL11     |                                                    | 3           | 1.73 | 3.78E-04 | 2.09E-03 |
|              |           |                                                    | -           |      |          |          |
|              |           |                                                    | 0.79        | -    |          |          |
| 211571_s_at  | VCAN      |                                                    | 3           | 1.73 | 1.46E-04 | 9.86E-04 |
|              |           |                                                    | -           |      |          |          |
|              |           | LOC100134445 /// LOC100288778 /// WASH1 /// WASH2P | 0.79        | -    |          |          |
| 1557034_s_at |           | /// WASH3P /// WASH5P /// WASH7P                   | 4           | 1.73 | 6.21E-04 | 3.09E-03 |
|              |           |                                                    | -           |      |          |          |
|              |           |                                                    | 0.79        | -    |          |          |
| 203221_at    | TLE1      |                                                    | 4           | 1.73 | 3.69E-11 | 4.39E-09 |
|              |           |                                                    | -           |      |          |          |
|              |           |                                                    | 0.79        | -    |          |          |
| 217649_at    | ZFAND5    |                                                    | 5           | 1.73 | 7.24E-06 | 8.76E-05 |
|              |           |                                                    | -           |      |          |          |
|              |           |                                                    | 0.79        | -    |          |          |
| 1559658_at   | KATNBL1   |                                                    | 5           | 1.74 | 3.31E-06 | 4.71E-05 |
|              |           |                                                    | -           |      |          |          |
|              |           |                                                    | 0.79        | -    |          |          |
| 212103_at    | KPNA6     |                                                    | 5           | 1.74 | 3.11E-05 | 2.84E-04 |
|              |           |                                                    | -           |      |          |          |
|              |           |                                                    | 0.79        | -    |          |          |
| 242458_at    | RALGPS2   |                                                    | 6           | 1.74 | 5.65E-07 | 1.12E-05 |
|              |           |                                                    | -           |      |          |          |
|              |           |                                                    | 0.79        | -    |          |          |
| 1558028_x_at | LINC00657 |                                                    | 6           | 1.74 | 2.36E-05 | 2.29E-04 |
|              |           |                                                    | -           |      |          |          |
|              |           |                                                    | 0.79        | -    |          |          |
| 219340_s_at  | CLN8      |                                                    | 8           | 1.74 | 6.89E-10 | 5.15E-08 |
|              |           |                                                    | -           |      |          |          |
|              |           |                                                    | 0.79        | -    |          |          |
| 204761_at    | USP6NL    |                                                    | 8           | 1.74 | 6.48E-11 | 7.01E-09 |
|              |           |                                                    | -           |      |          |          |
|              |           |                                                    | 0.79        | -    |          |          |
| 213344_s_at  | H2AFX     |                                                    | 8           | 1.74 | 2.36E-09 | 1.41E-07 |
|              |           |                                                    | -           |      |          |          |
|              |           |                                                    | 0.79        | -    |          |          |
| 221881_s_at  | CLIC4     |                                                    | 8           | 1.74 | 1.22E-05 | 1.34E-04 |
|              |           |                                                    | -           |      |          |          |
|              |           |                                                    | 201939_at   | 1.74 | 8.12E-07 | 1.51E-05 |
|              |           |                                                    | -           |      |          |          |
|              |           |                                                    | 241669_x_at | 1.74 | 1.85E-04 | 1.19E-03 |
|              |           |                                                    | -           |      |          |          |
|              |           |                                                    | 0.80        | -    |          |          |
| 222146_s_at  | TCF4      |                                                    | 1           | 1.74 | 3.10E-06 | 4.47E-05 |
|              |           |                                                    | -           |      |          |          |
|              |           |                                                    | 0.80        | -    |          |          |
| 228977_at    | LOC729680 |                                                    | 1           | 1.74 | 4.54E-06 | 6.08E-05 |
|              |           |                                                    | -           |      |          |          |
|              |           |                                                    | 0.80        | -    |          |          |
| 212144_at    | SUN2      |                                                    | 1           | 1.74 | 8.52E-09 | 3.97E-07 |
|              |           |                                                    | -           |      |          |          |
|              |           |                                                    | 0.80        | -    |          |          |
| 213272_s_at  | TMEM159   |                                                    | 1           | 1.74 | 2.25E-05 | 2.20E-04 |
|              |           |                                                    | -           |      |          |          |
|              |           |                                                    | 0.80        | -    |          |          |
| 219478_at    | WFDC1     |                                                    | 2           | 1.74 | 1.55E-03 | 6.40E-03 |
|              |           |                                                    | -           |      |          |          |
|              |           |                                                    | 0.80        | -    |          |          |
| 52651_at     | COL8A2    |                                                    | 2           | 1.74 | 2.21E-07 | 5.47E-06 |
|              |           |                                                    | -           |      |          |          |
|              |           |                                                    | 0.80        | -    |          |          |
| 215855_s_at  | TMF1      |                                                    | 3           | 1.74 | 3.24E-05 | 2.93E-04 |

|              |           |                                                     |       |      |          |          |
|--------------|-----------|-----------------------------------------------------|-------|------|----------|----------|
|              |           |                                                     | 0.80  | -    |          |          |
| 222810_s_at  | RASAL2    |                                                     | 3     | 1.74 | 9.83E-06 | 1.13E-04 |
|              |           |                                                     | -     |      |          |          |
|              |           |                                                     | 0.80  | -    |          |          |
| 212013_at    | PXDN      |                                                     | 4     | 1.75 | 9.36E-06 | 1.08E-04 |
|              |           |                                                     | -     |      |          |          |
|              |           |                                                     | 0.80  | -    |          |          |
| 223478_at    | TIMM8B    |                                                     | 4     | 1.75 | 1.07E-05 | 1.20E-04 |
|              |           |                                                     | -     |      |          |          |
|              |           |                                                     | 0.80  | -    |          |          |
| 209288_s_at  | CDC42EP3  |                                                     | 4     | 1.75 | 1.93E-08 | 7.74E-07 |
|              |           |                                                     | -     |      |          |          |
|              |           |                                                     | 0.80  | -    |          |          |
| 232213_at    | PEL1      |                                                     | 4     | 1.75 | 2.50E-05 | 2.40E-04 |
|              |           |                                                     | -     |      |          |          |
|              |           |                                                     | 0.80  | -    |          |          |
| 209127_s_at  | SART3     |                                                     | 4     | 1.75 | 2.16E-05 | 2.13E-04 |
|              |           |                                                     | -     |      |          |          |
|              |           |                                                     | 0.80  | -    |          |          |
| 1555007_s_at | WDR66     |                                                     | 5     | 1.75 | 9.54E-07 | 1.72E-05 |
|              |           |                                                     | -     |      |          |          |
|              |           |                                                     | 0.80  | -    |          |          |
| 226026_at    | DIRC2     |                                                     | 5     | 1.75 | 4.81E-11 | 5.45E-09 |
|              |           |                                                     | -     |      |          |          |
|              |           |                                                     | 0.80  | -    |          |          |
| 213478_at    | KAZN      |                                                     | 5     | 1.75 | 7.31E-06 | 8.84E-05 |
|              |           |                                                     | -     |      |          |          |
|              |           |                                                     | 0.80  | -    |          |          |
| 225950_at    | SAMD8     |                                                     | 6     | 1.75 | 3.84E-11 | 4.52E-09 |
|              |           |                                                     | -     |      |          |          |
|              |           |                                                     | 0.80  | -    |          |          |
| 231873_at    | BMPR2     |                                                     | 6     | 1.75 | 1.28E-04 | 8.87E-04 |
|              |           |                                                     | -     |      |          |          |
|              |           |                                                     | 0.80  | -    |          |          |
| 1553185_at   | RASEF     |                                                     | 7     | 1.75 | 1.69E-08 | 6.88E-07 |
|              |           |                                                     | -     |      |          |          |
|              |           |                                                     | 0.80  | -    |          |          |
| 226920_at    | CSNK1A1   |                                                     | 7     | 1.75 | 4.34E-04 | 2.33E-03 |
|              |           | HIST1H3A /// HIST1H3B /// HIST1H3C /// HIST1H3D /// | -     |      |          |          |
|              |           | HIST1H3E /// HIST1H3F /// HIST1H3G /// HIST1H3H /// | 0.80  | -    |          |          |
| 208577_at    |           | HIST1H3I /// HIST1H3J                               | 7     | 1.75 | 2.75E-04 | 1.62E-03 |
|              |           |                                                     | -     |      |          |          |
|              |           |                                                     | 0.80  | -    |          |          |
| 201693_s_at  | EGR1      |                                                     | 7     | 1.75 | 3.02E-04 | 1.75E-03 |
|              |           |                                                     | -     |      |          |          |
|              |           |                                                     | 0.80  | -    |          |          |
| 220456_at    | SPTLC3    |                                                     | 7     | 1.75 | 2.04E-09 | 1.25E-07 |
|              |           |                                                     | -     |      |          |          |
|              |           |                                                     | 0.80  | -    |          |          |
| 205150_s_at  | TRIL      |                                                     | 7     | 1.75 | 2.59E-05 | 2.46E-04 |
|              |           |                                                     | -     |      |          |          |
|              |           |                                                     | 0.80  | -    |          |          |
| 211362_s_at  | SERPINB13 |                                                     | 8     | 1.75 | 4.93E-09 | 2.57E-07 |
|              |           |                                                     | -     |      |          |          |
|              |           |                                                     | 0.80  | -    |          |          |
| 242512_at    | MYO9A     |                                                     | 8     | 1.75 | 1.60E-04 | 1.06E-03 |
|              |           |                                                     | -     |      |          |          |
|              |           |                                                     | 0.80  | -    |          |          |
| 226651_at    | HOMER1    |                                                     | 8     | 1.75 | 1.23E-08 | 5.29E-07 |
|              |           |                                                     | -     |      |          |          |
|              |           |                                                     | -0.81 | 1.75 | 5.28E-10 | 4.12E-08 |
| 209280_at    | MRC2      |                                                     | -     |      |          |          |
|              |           |                                                     | -0.81 | 1.75 | 1.79E-06 | 2.87E-05 |
| 224397_s_at  | TMTC1     |                                                     | -     |      |          |          |
|              |           |                                                     | -0.81 | 1.75 | 4.73E-04 | 2.50E-03 |
| 224851_at    | CDK6      |                                                     | -     |      |          |          |

|             |          |       |      |          |          |
|-------------|----------|-------|------|----------|----------|
| 232864_s_at | AFF4     | -0.81 | 1.75 | 1.45E-05 | 1.54E-04 |
|             |          | -     |      |          |          |
|             |          | 0.81  | -    |          |          |
| 212417_at   | SCAMP1   | 1     | 1.75 | 4.08E-04 | 2.22E-03 |
|             |          | -     |      |          |          |
|             |          | 0.81  | -    |          |          |
| 230464_at   | S1PR5    | 1     | 1.75 | 8.41E-06 | 9.92E-05 |
|             |          | -     |      |          |          |
|             |          | 0.81  | -    |          |          |
| 209793_at   | GRIA1    | 2     | 1.76 | 4.52E-03 | 1.52E-02 |
|             |          | -     |      |          |          |
|             |          | 0.81  | -    |          |          |
| 202378_s_at | LEPROT   | 3     | 1.76 | 5.41E-04 | 2.77E-03 |
|             |          | -     |      |          |          |
|             |          | 0.81  | -    |          |          |
| 41856_at    | UNC5B    | 4     | 1.76 | 3.39E-07 | 7.57E-06 |
|             |          | -     |      |          |          |
|             |          | 0.81  | -    |          |          |
| 209125_at   | KRT6A    | 4     | 1.76 | 3.77E-08 | 1.33E-06 |
|             |          | -     |      |          |          |
|             |          | 0.81  | -    |          |          |
| 213999_at   | YIPF4    | 4     | 1.76 | 1.81E-06 | 2.89E-05 |
|             |          | -     |      |          |          |
|             |          | 0.81  | -    |          |          |
| 209873_s_at | PKP3     | 5     | 1.76 | 1.83E-07 | 4.69E-06 |
|             |          | -     |      |          |          |
|             |          | 0.81  | -    |          |          |
| 241990_at   | RHOV     | 5     | 1.76 | 3.48E-07 | 7.73E-06 |
|             |          | -     |      |          |          |
|             |          | 0.81  | -    |          |          |
| 212800_at   | STX6     | 5     | 1.76 | 6.30E-09 | 3.12E-07 |
|             |          | -     |      |          |          |
|             |          | 0.81  | -    |          |          |
| 1568126_at  | ANXA2    | 6     | 1.76 | 3.55E-05 | 3.14E-04 |
|             |          | -     |      |          |          |
|             |          | 0.81  | -    |          |          |
| 217871_s_at | MIF      | 6     | 1.76 | 3.11E-05 | 2.83E-04 |
|             |          | -     |      |          |          |
|             |          | 0.81  | -    |          |          |
| 220816_at   | LPAR3    | 6     | 1.76 | 2.02E-08 | 8.05E-07 |
|             |          | -     |      |          |          |
|             |          | 0.81  | -    |          |          |
| 217294_s_at | ENO1     | 8     | 1.76 | 1.59E-03 | 6.52E-03 |
|             |          | -     |      |          |          |
|             |          | 0.81  | -    |          |          |
| 220489_s_at | SERINC2  | 8     | 1.76 | 2.97E-07 | 6.90E-06 |
|             |          | -     |      |          |          |
|             |          | 0.81  | -    |          |          |
| 218484_at   | NDUFA4L2 | 9     | 1.76 | 1.03E-04 | 7.43E-04 |
|             |          | -     |      |          |          |
|             |          | 0.81  | -    |          |          |
| 227461_at   | STON2    | 9     | 1.76 | 3.57E-12 | 6.25E-10 |
|             |          | -     |      |          |          |
|             |          | 0.81  | -    |          |          |
| 216629_at   | SRRM2    | 9     | 1.76 | 2.73E-05 | 2.56E-04 |
|             |          | -     |      |          |          |
|             |          | 0.81  | -    |          |          |
| 229929_at   | SPSB4    | 9     | 1.76 | 8.32E-09 | 3.91E-07 |
|             |          | -     |      |          |          |
|             |          | 0.81  | -    |          |          |
| 1556423_at  | VASH1    | 9     | 1.76 | 1.39E-05 | 1.48E-04 |
|             |          | -     |      |          |          |
|             |          | 0.81  | -    |          |          |
| 221487_s_at | ENSA     | 9     | 1.76 | 5.98E-08 | 1.95E-06 |
|             |          | -     |      |          |          |
|             |          | 0.81  | -    |          |          |
| 232360_at   | EHF      | 9     | 1.76 | 3.48E-03 | 1.23E-02 |

|             |                                            |       |      |          |          |
|-------------|--------------------------------------------|-------|------|----------|----------|
|             |                                            | 9     |      |          |          |
|             |                                            | -     |      |          |          |
| 1565939_at  | C5orf22                                    | 0.81  | -    |          |          |
|             |                                            | 9     | 1.76 | 6.43E-05 | 5.06E-04 |
|             |                                            | -     |      |          |          |
| 228998_at   | TNRC6B                                     | 0.81  | -    |          |          |
|             |                                            | 9     | 1.76 | 2.72E-05 | 2.56E-04 |
|             |                                            | -     |      |          |          |
| 203692_s_at | E2F3                                       | 0.81  | -    |          |          |
|             |                                            | 9     | 1.76 | 1.23E-06 | 2.13E-05 |
|             |                                            | -     |      |          |          |
| 219806_s_at | SMCO4                                      | -0.82 | 1.77 | 9.49E-08 | 2.77E-06 |
|             |                                            | -     |      |          |          |
| 210419_at   | BARX2                                      | -0.82 | 1.77 | 1.57E-11 | 2.18E-09 |
|             |                                            | -     |      |          |          |
| 208978_at   | CRIP2                                      | 0.82  | -    |          |          |
|             |                                            | 1     | 1.77 | 5.22E-07 | 1.05E-05 |
|             |                                            | -     |      |          |          |
| 228126_x_at | CTXN1                                      | 0.82  | -    |          |          |
|             |                                            | 2     | 1.77 | 2.72E-08 | 1.03E-06 |
|             |                                            | -     |      |          |          |
| 213096_at   | TMCC2                                      | 0.82  | -    |          |          |
|             |                                            | 2     | 1.77 | 1.04E-12 | 2.22E-10 |
|             |                                            | -     |      |          |          |
| 215199_at   | CALD1                                      | 0.82  | -    |          |          |
|             |                                            | 3     | 1.77 | 3.03E-06 | 4.39E-05 |
|             |                                            | -     |      |          |          |
| 226071_at   | ADAMTSL4                                   | 0.82  | -    |          |          |
|             |                                            | 3     | 1.77 | 8.70E-05 | 6.48E-04 |
|             |                                            | -     |      |          |          |
| 221539_at   | EIF4EBP1                                   | 0.82  | -    |          |          |
|             |                                            | 4     | 1.77 | 2.18E-11 | 2.87E-09 |
|             |                                            | -     |      |          |          |
| 201266_at   | TXNRD1                                     | 0.82  | -    |          |          |
|             |                                            | 6     | 1.77 | 4.21E-14 | 1.38E-11 |
|             |                                            | -     |      |          |          |
| 214805_at   | EIF4A1 /// SNORA48 /// SNORA67 /// SNORD10 | 0.82  | -    |          |          |
|             |                                            | 6     | 1.77 | 8.13E-05 | 6.14E-04 |
|             |                                            | -     |      |          |          |
| 204818_at   | HSD17B2                                    | 0.82  | -    |          |          |
|             |                                            | 8     | 1.77 | 3.92E-04 | 2.15E-03 |
|             |                                            | -     |      |          |          |
| 222701_s_at | CHCHD7                                     | 0.82  | -    |          |          |
|             |                                            | 8     | 1.77 | 9.58E-11 | 9.95E-09 |
|             |                                            | -     |      |          |          |
| 204654_s_at | TFAP2A                                     | 0.82  | -    |          |          |
|             |                                            | 9     | 1.78 | 1.01E-05 | 1.15E-04 |
|             |                                            | -     |      |          |          |
| 213100_at   | UNC5B                                      | 0.82  | -    |          |          |
|             |                                            | 9     | 1.78 | 1.22E-06 | 2.12E-05 |
|             |                                            | -     |      |          |          |
| 205187_at   | SMAD5                                      | 0.82  | -    |          |          |
|             |                                            | 9     | 1.78 | 1.66E-03 | 6.76E-03 |
|             |                                            | -     |      |          |          |
| 201986_at   | MED13                                      | -0.83 | 1.78 | 4.07E-05 | 3.53E-04 |
|             |                                            | -     |      |          |          |
| 234923_at   | RALGAPA1                                   | -0.83 | 1.78 | 8.14E-06 | 9.66E-05 |
|             |                                            | -     |      |          |          |
| 214829_at   | AASS                                       | 0.83  | -    |          |          |
|             |                                            | 1     | 1.78 | 1.37E-05 | 1.46E-04 |
|             |                                            | -     |      |          |          |
| 226187_at   | CDS1                                       | 0.83  | -    |          |          |
|             |                                            | 2     | 1.78 | 1.02E-11 | 1.50E-09 |
|             |                                            | -     |      |          |          |
| 1569320_at  | GPBP1L1                                    | 0.83  | -    |          |          |
|             |                                            | 2     | 1.78 | 7.31E-05 | 5.62E-04 |



|              |          |       |      |          |          |
|--------------|----------|-------|------|----------|----------|
|              |          | -     |      |          |          |
|              |          | 0.83  | -    |          |          |
| 206156_at    | GJB5     | 2     | 1.78 | 6.91E-05 | 5.36E-04 |
|              |          | -     |      |          |          |
|              |          | 0.83  | -    |          |          |
| 201737_s_at  | 6-Mar    | 4     | 1.78 | 3.15E-04 | 1.81E-03 |
|              |          | -     |      |          |          |
|              |          | 0.83  | -    |          |          |
| 211672_s_at  | ARPC4    | 4     | 1.78 | 2.61E-04 | 1.55E-03 |
|              |          | -     |      |          |          |
|              |          | 0.83  | -    |          |          |
| 1559881_s_at | ZNF12    | 4     | 1.78 | 7.53E-06 | 9.07E-05 |
|              |          | -     |      |          |          |
|              |          | 0.83  | -    |          |          |
| 1553349_at   | ARID2    | 6     | 1.78 | 1.69E-05 | 1.74E-04 |
|              |          | -     |      |          |          |
|              |          | 0.83  | -    |          |          |
| 221771_s_at  | MPHOSPH8 | 6     | 1.79 | 5.98E-05 | 4.77E-04 |
|              |          | -     |      |          |          |
|              |          | 0.83  | -    |          |          |
| 235367_at    | MYPN     | 6     | 1.79 | 1.74E-12 | 3.38E-10 |
|              |          | -     |      |          |          |
|              |          | 0.83  | -    |          |          |
| 223940_x_at  | MALAT1   | 7     | 1.79 | 1.98E-09 | 1.22E-07 |
|              |          | -     |      |          |          |
|              |          | 0.83  | -    |          |          |
| 240144_at    | DNASE1   | 7     | 1.79 | 7.82E-06 | 9.34E-05 |
|              |          | -     |      |          |          |
|              |          | 0.83  | -    |          |          |
| 228040_at    | MGC21881 | 7     | 1.79 | 1.17E-05 | 1.30E-04 |
|              |          | -     |      |          |          |
|              |          | 0.83  | -    |          |          |
| 222164_at    | FGFR1    | 8     | 1.79 | 4.50E-09 | 2.38E-07 |
|              |          | -     |      |          |          |
|              |          | 0.83  | -    |          |          |
| 203987_at    | FZD6     | 8     | 1.79 | 1.35E-10 | 1.31E-08 |
|              |          | -     |      |          |          |
|              |          | 0.83  | -    |          |          |
| 214119_s_at  | FKBP1A   | 8     | 1.79 | 9.12E-08 | 2.69E-06 |
|              |          | -     |      |          |          |
|              |          | 0.83  | -    |          |          |
| 213038_at    | RNF19B   | 9     | 1.79 | 4.90E-11 | 5.54E-09 |
|              |          | -     |      |          |          |
|              |          | 0.83  | -    |          |          |
| 239899_at    | RNF145   | -0.84 | 1.79 | 5.92E-07 | 1.16E-05 |
|              |          | -     |      |          |          |
|              |          | 0.83  | -    |          |          |
| 201183_s_at  | CHD4     | -0.84 | 1.79 | 9.49E-06 | 1.10E-04 |
|              |          | -     |      |          |          |
|              |          | 0.84  | -    |          |          |
| 206114_at    | EPHA4    | 1     | 1.79 | 6.13E-05 | 4.87E-04 |
|              |          | -     |      |          |          |
|              |          | 0.84  | -    |          |          |
| 209457_at    | DUSP5    | 1     | 1.79 | 1.99E-07 | 5.03E-06 |
|              |          | -     |      |          |          |
|              |          | 0.84  | -    |          |          |
| 205209_at    | ACVR1B   | 2     | 1.79 | 3.38E-04 | 1.91E-03 |
|              |          | -     |      |          |          |
|              |          | 0.84  | -    |          |          |
| 203634_s_at  | CPT1A    | 2     | 1.79 | 1.41E-05 | 1.50E-04 |
|              |          | -     |      |          |          |
|              |          | 0.84  | -    |          |          |
| 1565703_at   | SMAD4    | 4     | 1.79 | 4.30E-05 | 3.68E-04 |
|              |          | -     |      |          |          |
|              |          | 0.84  | -    |          |          |
| 243611_at    | MICALCL  | 4     | 1.79 | 2.66E-08 | 1.01E-06 |
|              |          | -     |      |          |          |
|              |          | 0.84  | -    |          |          |
| 213425_at    | WNT5A    | 4     | -1.8 | 2.24E-09 | 1.35E-07 |

|              |                                                                               |       |      |          |          |          |
|--------------|-------------------------------------------------------------------------------|-------|------|----------|----------|----------|
|              |                                                                               |       | -    |          |          |          |
| 224854_s_at  | SLAIN2                                                                        | 0.84  | 5    | -1.8     | 5.45E-07 | 1.09E-05 |
|              |                                                                               | -     |      |          |          |          |
| 201645_at    | TNC                                                                           | 0.84  | 5    | -1.8     | 1.98E-06 | 3.12E-05 |
|              |                                                                               | -     |      |          |          |          |
| 226541_at    | FBXO30                                                                        | 0.84  | 6    | -1.8     | 2.39E-10 | 2.13E-08 |
|              |                                                                               | -     |      |          |          |          |
| 238001_at    | KCTD6                                                                         | 0.84  | 6    | -1.8     | 1.14E-08 | 5.02E-07 |
|              |                                                                               | -     |      |          |          |          |
| 217238_s_at  | ALDOB                                                                         | 0.84  | 7    | -1.8     | 1.13E-08 | 5.00E-07 |
|              |                                                                               | -     |      |          |          |          |
| 202416_at    | DNAJC7                                                                        | 0.84  | 7    | -1.8     | 9.59E-11 | 9.95E-09 |
|              |                                                                               | -     |      |          |          |          |
| 1553186_x_at | RASEF                                                                         | 0.84  | 8    | -1.8     | 8.56E-08 | 2.57E-06 |
|              |                                                                               | -     |      |          |          |          |
| 209591_s_at  | BMP7                                                                          | 0.84  | 8    | -1.8     | 6.08E-06 | 7.64E-05 |
|              |                                                                               | -     |      |          |          |          |
| 208908_s_at  | CAST                                                                          | 0.84  | 8    | -1.8     | 3.47E-10 | 2.92E-08 |
|              |                                                                               | -     |      |          |          |          |
| 232249_at    | FMNL3                                                                         | 0.84  | 9    | -1.8     | 3.13E-05 | 2.85E-04 |
| 1565717_s_at | FUS                                                                           | -0.85 | -1.8 | 7.15E-05 | 5.52E-04 |          |
|              |                                                                               | -     |      |          |          |          |
| 210655_s_at  | FOXO3 /// FOXO3B                                                              | 0.85  | 1    | -1.8     | 3.81E-08 | 1.34E-06 |
|              |                                                                               | -     |      |          |          |          |
| 1558387_at   | UG0898H09                                                                     | 0.85  | 1    | -1.8     | 1.42E-04 | 9.66E-04 |
|              |                                                                               | -     |      |          |          |          |
| 239913_at    | SLC10A4                                                                       | 0.85  | 2    | -1.8     | 1.54E-07 | 4.12E-06 |
|              |                                                                               | -     |      |          |          |          |
| 225852_at    | ANKRD17                                                                       | 0.85  | 3    | 1.81     | 5.89E-05 | 4.71E-04 |
|              |                                                                               | -     |      |          |          |          |
| 1555225_at   | C1orf43                                                                       | 0.85  | 4    | 1.81     | 1.25E-07 | 3.48E-06 |
|              |                                                                               | -     |      |          |          |          |
| 231439_at    | FAM84A                                                                        | 0.85  | 4    | 1.81     | 4.18E-08 | 1.44E-06 |
|              |                                                                               | -     |      |          |          |          |
| 231108_at    | FUS                                                                           | 0.85  | 4    | 1.81     | 3.41E-04 | 1.92E-03 |
|              |                                                                               | -     |      |          |          |          |
| 230369_at    | GPR161                                                                        | 0.85  | 5    | 1.81     | 3.31E-10 | 2.81E-08 |
|              |                                                                               | -     |      |          |          |          |
| 203016_s_at  | SSX2IP                                                                        | 0.85  | 5    | 1.81     | 3.64E-12 | 6.34E-10 |
|              |                                                                               | -     |      |          |          |          |
| 244682_at    | CAMSAP1                                                                       | 0.85  | 5    | 1.81     | 1.68E-05 | 1.74E-04 |
|              |                                                                               | -     |      |          |          |          |
| 242881_x_at  | LOC100506303 /// LOC100653149 /// LOC101060483 ///<br>LOC400879 /// LOC440157 | 0.85  | 6    | 1.81     | 2.87E-03 | 1.05E-02 |
|              |                                                                               | -     |      |          |          |          |
| 224559_at    | MALAT1                                                                        | 0.85  | 1.81 | 1.28E-06 | 2.19E-05 |          |

|              |                                                          |       |      |          |          |
|--------------|----------------------------------------------------------|-------|------|----------|----------|
|              |                                                          | 6     |      |          |          |
|              |                                                          | -     |      |          |          |
| 1554671_a_at | SRRM2                                                    | 0.85  | -    |          |          |
|              |                                                          | 7     | 1.81 | 1.55E-04 | 1.03E-03 |
|              |                                                          | -     |      |          |          |
| 1569126_at   | CCNC                                                     | 0.85  | -    |          |          |
|              |                                                          | 7     | 1.81 | 2.06E-05 | 2.05E-04 |
|              |                                                          | -     |      |          |          |
| 210910_s_at  | POMZP3                                                   | 0.85  | -    |          |          |
|              |                                                          | 8     | 1.81 | 5.49E-04 | 2.81E-03 |
|              |                                                          | -     |      |          |          |
| 202208_s_at  | ARL4C                                                    | 0.85  | -    |          |          |
|              |                                                          | 8     | 1.81 | 4.00E-10 | 3.26E-08 |
|              |                                                          | -     |      |          |          |
| 224325_at    | FZD8                                                     | 0.85  | -    |          |          |
|              |                                                          | 9     | 1.81 | 2.57E-04 | 1.54E-03 |
|              |                                                          | -     |      |          |          |
| 1552334_at   | TRIOBP                                                   | 0.85  | -    |          |          |
|              |                                                          | 9     | 1.81 | 2.22E-06 | 3.43E-05 |
|              |                                                          | -     |      |          |          |
| 239707_at    | SLC5A10                                                  | 0.85  | -    |          |          |
|              |                                                          | 9     | 1.81 | 1.33E-11 | 1.90E-09 |
|              |                                                          | -     |      |          |          |
| 1567107_s_at | TPM4                                                     | 0.85  | -    |          |          |
|              |                                                          | 9     | 1.81 | 3.11E-08 | 1.15E-06 |
|              |                                                          | -     |      |          |          |
| 206315_at    | CRLF1                                                    | -0.86 | 1.81 | 5.18E-10 | 4.07E-08 |
|              |                                                          | -     |      |          |          |
| 232537_x_at  | MARK3                                                    | -0.86 | 1.82 | 3.58E-04 | 2.00E-03 |
|              | LOC101059961 /// LOC101060202 /// LOC101060226 ///       | -     |      |          |          |
|              | LOC101060362 /// LOC101060684 /// NBPF1 /// NBPF10       | -     |      |          |          |
|              | /// NBPF11 /// NBPF12 /// NBPF24 /// NBPF7 /// NBPF8 /// | 0.86  | -    |          |          |
| 1569519_at   | NBPF9                                                    | 1     | 1.82 | 8.36E-07 | 1.54E-05 |
|              |                                                          | -     |      |          |          |
| 228786_at    | PTCHD3P1                                                 | 0.86  | -    |          |          |
|              |                                                          | 1     | 1.82 | 4.05E-06 | 5.54E-05 |
|              |                                                          | -     |      |          |          |
| 204117_at    | PREP                                                     | 0.86  | -    |          |          |
|              |                                                          | 1     | 1.82 | 6.04E-11 | 6.59E-09 |
|              |                                                          | -     |      |          |          |
| 230830_at    | SLC51B                                                   | 0.86  | -    |          |          |
|              |                                                          | 1     | 1.82 | 7.04E-10 | 5.22E-08 |
|              |                                                          | -     |      |          |          |
| 1568617_a_at | CAMSAP3                                                  | 0.86  | -    |          |          |
|              |                                                          | 2     | 1.82 | 1.78E-06 | 2.86E-05 |
|              |                                                          | -     |      |          |          |
| 239062_at    | TNRC6C-AS1                                               | 0.86  | -    |          |          |
|              |                                                          | 2     | 1.82 | 1.62E-07 | 4.27E-06 |
|              |                                                          | -     |      |          |          |
| 240383_at    | UBE2D3                                                   | 0.86  | -    |          |          |
|              |                                                          | 3     | 1.82 | 7.99E-06 | 9.52E-05 |
|              |                                                          | -     |      |          |          |
| 236696_at    | U2SURP                                                   | 0.86  | -    |          |          |
|              |                                                          | 3     | 1.82 | 5.40E-03 | 1.76E-02 |
|              |                                                          | -     |      |          |          |
| 205918_at    | SLC4A3                                                   | 0.86  | -    |          |          |
|              |                                                          | 3     | 1.82 | 1.04E-05 | 1.18E-04 |
|              |                                                          | -     |      |          |          |
| 217591_at    | SKIL                                                     | 0.86  | -    |          |          |
|              |                                                          | 4     | 1.82 | 2.38E-07 | 5.80E-06 |
|              |                                                          | -     |      |          |          |
| 207011_s_at  | PTK7                                                     | 0.86  | -    |          |          |
|              |                                                          | 5     | 1.82 | 6.85E-08 | 2.18E-06 |
|              |                                                          | -     |      |          |          |
| 217897_at    | FXD6                                                     | 0.86  | -    |          |          |
|              |                                                          | 6     | 1.82 | 3.56E-06 | 5.00E-05 |

|             |                   |       |      |          |          |  |
|-------------|-------------------|-------|------|----------|----------|--|
|             |                   |       | -    |          |          |  |
| 219869_s_at | SLC39A8           | 0.86  | -    |          |          |  |
|             |                   | 6     | 1.82 | 3.70E-05 | 3.26E-04 |  |
|             |                   | -     |      |          |          |  |
| 225830_at   | PDZD8             | 0.86  | -    |          |          |  |
|             |                   | 8     | 1.83 | 5.38E-11 | 5.96E-09 |  |
|             |                   | -     |      |          |          |  |
| 243496_at   | RAB18             | 0.86  | -    |          |          |  |
|             |                   | 8     | 1.83 | 2.05E-06 | 3.21E-05 |  |
|             |                   | -     |      |          |          |  |
| 230028_at   | KIAA0907          | 0.86  | -    |          |          |  |
|             |                   | 9     | 1.83 | 3.51E-06 | 4.95E-05 |  |
|             |                   | -     |      |          |          |  |
| 204750_s_at | DSC2              | 0.86  | -    |          |          |  |
|             |                   | 9     | 1.83 | 3.17E-07 | 7.22E-06 |  |
|             |                   | -     |      |          |          |  |
| 220067_at   | SPTBN5            | 0.86  | -    |          |          |  |
|             |                   | 9     | 1.83 | 5.75E-05 | 4.62E-04 |  |
|             |                   | -     |      |          |          |  |
| 215646_s_at | VCAN              | 0.86  | -    |          |          |  |
|             |                   | 9     | 1.83 | 3.78E-04 | 2.09E-03 |  |
|             |                   | -     |      |          |          |  |
| 220244_at   | LINC00312         | 0.86  | -    |          |          |  |
|             |                   | 9     | 1.83 | 1.16E-05 | 1.28E-04 |  |
|             |                   | -     |      |          |          |  |
| 210074_at   | CTSL2             | 0.86  | -    |          |          |  |
|             |                   | 9     | 1.83 | 6.26E-05 | 4.96E-04 |  |
|             |                   | -     |      |          |          |  |
| 237466_s_at | HHIP              | 0.86  | -    |          |          |  |
|             |                   | 9     | 1.83 | 2.86E-07 | 6.68E-06 |  |
|             |                   | -     |      |          |          |  |
| 203021_at   | SLPI              | -0.87 | 1.83 | 3.74E-08 | 1.33E-06 |  |
|             |                   | -     |      |          |          |  |
| 217608_at   | SREK1IP1          | -0.87 | 1.83 | 4.66E-05 | 3.92E-04 |  |
|             |                   | -     |      |          |          |  |
| 215224_at   | RPL23 /// SNORA21 | 0.87  | -    |          |          |  |
|             |                   | 2     | 1.83 | 2.72E-03 | 1.01E-02 |  |
|             |                   | -     |      |          |          |  |
| 222757_s_at | ZAK               | 0.87  | -    |          |          |  |
|             |                   | 2     | 1.83 | 6.93E-06 | 8.47E-05 |  |
|             |                   | -     |      |          |          |  |
| 241955_at   | HECTD1            | 0.87  | -    |          |          |  |
|             |                   | 2     | 1.83 | 2.51E-06 | 3.78E-05 |  |
|             |                   | -     |      |          |          |  |
| 220022_at   | ZNF334            | 0.87  | -    |          |          |  |
|             |                   | 3     | 1.83 | 4.50E-04 | 2.40E-03 |  |
|             |                   | -     |      |          |          |  |
| 232094_at   | KATNBL1           | 0.87  | -    |          |          |  |
|             |                   | 4     | 1.83 | 1.33E-04 | 9.16E-04 |  |
|             |                   | -     |      |          |          |  |
| 213069_at   | HEG1              | 0.87  | -    |          |          |  |
|             |                   | 4     | 1.83 | 5.00E-10 | 3.95E-08 |  |
|             |                   | -     |      |          |          |  |
| 232168_x_at | MACF1             | 0.87  | -    |          |          |  |
|             |                   | 5     | 1.83 | 2.24E-06 | 3.44E-05 |  |
|             |                   | -     |      |          |          |  |
| 1557953_at  | ZKSCAN1           | 0.87  | -    |          |          |  |
|             |                   | 5     | 1.83 | 3.99E-04 | 2.18E-03 |  |
|             |                   | -     |      |          |          |  |
| 207268_x_at | ABI2              | 0.87  | -    |          |          |  |
|             |                   | 6     | 1.84 | 4.42E-13 | 1.06E-10 |  |
|             |                   | -     |      |          |          |  |
| 1553691_at  | B3GALNT2          | 0.87  | -    |          |          |  |
|             |                   | 6     | 1.84 | 2.00E-10 | 1.83E-08 |  |
|             |                   | -     |      |          |          |  |
| 215066_at   | PTPRF             | 0.87  | -    |          |          |  |
|             |                   | 6     | 1.84 | 7.78E-06 | 9.31E-05 |  |

|              |                     |       |      |          |          |
|--------------|---------------------|-------|------|----------|----------|
|              |                     | -     |      |          |          |
|              |                     | 0.87  | -    |          |          |
| 211503_s_at  | RAB14               | 6     | 1.84 | 2.57E-05 | 2.45E-04 |
|              |                     | -     |      |          |          |
|              |                     | 0.87  | -    |          |          |
| 242906_at    | SESN3               | 7     | 1.84 | 5.82E-07 | 1.15E-05 |
|              |                     | -     |      |          |          |
|              |                     | 0.87  | -    |          |          |
| 222364_at    | SLC44A1             | 8     | 1.84 | 5.47E-05 | 4.45E-04 |
|              |                     | -     |      |          |          |
|              |                     | 0.87  | -    |          |          |
| 242191_at    | NBPF10              | 8     | 1.84 | 2.16E-04 | 1.34E-03 |
|              |                     | -     |      |          |          |
|              |                     | 0.87  | -    |          |          |
| 209679_s_at  | SMAGP               | 8     | 1.84 | 7.18E-08 | 2.26E-06 |
|              |                     | -     |      |          |          |
|              |                     | 0.87  | -    |          |          |
| 206116_s_at  | TPM1                | 8     | 1.84 | 2.87E-05 | 2.67E-04 |
|              |                     | -     |      |          |          |
|              |                     | 0.87  | -    |          |          |
| 1563497_at   | USP25               | 9     | 1.84 | 6.13E-06 | 7.69E-05 |
|              |                     | -     |      |          |          |
|              |                     | 0.87  | -    |          |          |
| 203904_x_at  | CD82                | 9     | 1.84 | 2.10E-09 | 1.28E-07 |
|              |                     | -     |      |          |          |
|              |                     | 0.88  | -    |          |          |
| 1565525_a_at | TCP11L2             | 1     | 1.84 | 6.87E-09 | 3.35E-07 |
|              |                     | -     |      |          |          |
|              |                     | 0.88  | -    |          |          |
| 235684_s_at  | SESN3               | 1     | 1.84 | 3.26E-08 | 1.19E-06 |
|              |                     | -     |      |          |          |
|              |                     | 0.88  | -    |          |          |
| 239512_at    | SRSF4               | 2     | 1.84 | 5.54E-04 | 2.83E-03 |
|              |                     | -     |      |          |          |
|              |                     | 0.88  | -    |          |          |
| 222420_s_at  | UBE2H               | 2     | 1.84 | 5.97E-12 | 9.59E-10 |
|              |                     | -     |      |          |          |
|              |                     | 0.88  | -    |          |          |
| 217185_s_at  | ZNF259 /// ZNF259P1 | 3     | 1.84 | 1.11E-08 | 4.93E-07 |
|              |                     | -     |      |          |          |
|              |                     | 0.88  | -    |          |          |
| 207038_at    | SLC16A6             | 5     | 1.85 | 3.47E-08 | 1.25E-06 |
|              |                     | -     |      |          |          |
|              |                     | 0.88  | -    |          |          |
| 204141_at    | TUBB2A              | 7     | 1.85 | 1.33E-17 | 1.89E-14 |
|              |                     | -     |      |          |          |
|              |                     | 0.88  | -    |          |          |
| 220407_s_at  | TGFB2               | 7     | 1.85 | 2.12E-05 | 2.10E-04 |
|              |                     | -     |      |          |          |
|              |                     | 0.88  | -    |          |          |
| 1554703_at   | ARHGEF10            | 7     | 1.85 | 5.56E-06 | 7.12E-05 |
|              |                     | -     |      |          |          |
|              |                     | 0.88  | -    |          |          |
| 1568954_s_at | C16orf72            | 8     | 1.85 | 6.82E-09 | 3.34E-07 |
|              |                     | -     |      |          |          |
|              |                     | 0.88  | -    |          |          |
| 230622_at    | MLLT4               | 8     | 1.85 | 2.95E-11 | 3.68E-09 |
|              |                     | -     |      |          |          |
|              |                     | 0.88  | -    |          |          |
| 206375_s_at  | HSPB3               | 9     | 1.85 | 7.45E-06 | 8.97E-05 |
|              |                     | -     |      |          |          |
|              |                     | -0.89 | 1.85 | 1.13E-07 | 3.21E-06 |
| 202695_s_at  | STK17A              | -     | -    | -        | -        |
|              |                     | -     | -    | -        | -        |
|              |                     | -0.89 | 1.85 | 3.11E-08 | 1.15E-06 |
| 203779_s_at  | MPZL2               | -     | -    | -        | -        |
|              |                     | -     | -    | -        | -        |
|              |                     | -0.89 | 1.85 | 1.03E-03 | 4.63E-03 |
| 1564307_a_at | A2ML1               | -     | -    | -        | -        |

|              |                                 |       |      |          |          |
|--------------|---------------------------------|-------|------|----------|----------|
|              |                                 | -     |      |          |          |
| 235275_at    | BMP8B                           | 0.89  | -    |          |          |
|              |                                 | 1     | 1.86 | 3.56E-07 | 7.87E-06 |
|              |                                 | -     |      |          |          |
| 227269_s_at  | RAB40C                          | 0.89  | -    |          |          |
|              |                                 | 3     | 1.86 | 5.70E-07 | 1.13E-05 |
|              |                                 | -     |      |          |          |
| 1569142_at   | TRIM13                          | 0.89  | -    |          |          |
|              |                                 | 6     | 1.86 | 3.43E-06 | 4.85E-05 |
|              |                                 | -     |      |          |          |
| 210716_s_at  | CLIP1                           | 0.89  | -    |          |          |
|              |                                 | 6     | 1.86 | 9.81E-07 | 1.76E-05 |
|              |                                 | -     |      |          |          |
| 1564796_at   | EMP1                            | 0.89  | -    |          |          |
|              |                                 | 7     | 1.86 | 1.29E-04 | 8.95E-04 |
|              |                                 | -     |      |          |          |
| 212157_at    | SDC2                            | 0.89  | -    |          |          |
|              |                                 | 7     | 1.86 | 6.48E-06 | 8.01E-05 |
|              |                                 | -     |      |          |          |
| 213836_s_at  | WIP1                            | 0.89  | -    |          |          |
|              |                                 | 8     | 1.86 | 4.50E-11 | 5.20E-09 |
|              |                                 | -     |      |          |          |
| 1556204_a_at | ZNF814                          | 0.89  | -    |          |          |
|              |                                 | 9     | 1.86 | 6.17E-07 | 1.21E-05 |
|              |                                 | -     |      |          |          |
| 205157_s_at  | JUP /// KRT17                   | 0.89  | -    |          |          |
|              |                                 | 9     | 1.87 | 7.05E-07 | 1.35E-05 |
|              |                                 | -     |      |          |          |
| 221803_s_at  | NRBF2                           | 0.89  | -    |          |          |
|              |                                 | 9     | 1.87 | 2.63E-12 | 4.73E-10 |
|              |                                 | -     |      |          |          |
| 222348_at    | MAST4                           | -0.9  | 1.87 | 1.02E-08 | 4.60E-07 |
|              |                                 | -     |      |          |          |
| 202935_s_at  | SOX9                            | -0.9  | 1.87 | 1.17E-06 | 2.03E-05 |
|              |                                 | -     |      |          |          |
| 244755_at    | XPR1                            | -0.9  | 1.87 | 1.88E-08 | 7.54E-07 |
|              |                                 | -     |      |          |          |
| 203722_at    | ALDH4A1                         | 0.90  | -    |          |          |
|              |                                 | 2     | 1.87 | 1.06E-09 | 7.23E-08 |
|              |                                 | -     |      |          |          |
| 220962_s_at  | PADI1                           | 0.90  | -    |          |          |
|              |                                 | 2     | 1.87 | 4.40E-12 | 7.42E-10 |
|              |                                 | -     |      |          |          |
| 36564_at     | RNF19B                          | 0.90  | -    |          |          |
|              |                                 | 3     | 1.87 | 2.16E-12 | 4.05E-10 |
|              |                                 | -     |      |          |          |
| 210338_s_at  | HSPA8 /// SNORD14C /// SNORD14D | 0.90  | -    |          |          |
|              |                                 | 4     | 1.87 | 2.29E-04 | 1.41E-03 |
|              |                                 | -     |      |          |          |
| 225119_at    | CHMP4B                          | 0.90  | -    |          |          |
|              |                                 | 4     | 1.87 | 1.10E-08 | 4.87E-07 |
|              |                                 | -     |      |          |          |
| 202089_s_at  | SLC39A6                         | 0.90  | -    |          |          |
|              |                                 | 5     | 1.87 | 7.75E-08 | 2.39E-06 |
|              |                                 | -     |      |          |          |
| 214972_at    | MGEA5                           | 0.90  | -    |          |          |
|              |                                 | 6     | 1.87 | 3.47E-05 | 3.09E-04 |
|              |                                 | -     |      |          |          |
| 225718_at    | KIAA1715                        | 0.90  | -    |          |          |
|              |                                 | 6     | 1.87 | 2.41E-03 | 9.10E-03 |
|              |                                 | -     |      |          |          |
| 201981_at    | PAPPA                           | -0.91 | 1.88 | 1.56E-08 | 6.48E-07 |
|              |                                 | -     |      |          |          |
| 1558388_a_at | UG0898H09                       | -0.91 | 1.88 | 3.71E-04 | 2.06E-03 |
|              |                                 | -     |      |          |          |
| 234925_at    | LINC00917                       | -0.91 | 1.88 | 6.99E-10 | 5.20E-08 |

|              |           |       |      |          |          |
|--------------|-----------|-------|------|----------|----------|
| 230748_at    | SLC16A6   | -0.91 | 1.88 | 7.10E-10 | 5.25E-08 |
|              |           | -     |      |          |          |
|              |           | 0.91  | -    |          |          |
| 209243_s_at  | PEG3      | 1     | 1.88 | 6.35E-06 | 7.88E-05 |
|              |           | -     |      |          |          |
|              |           | 0.91  | -    |          |          |
| 1565759_at   | RPL13     | 2     | 1.88 | 3.74E-08 | 1.33E-06 |
|              |           | -     |      |          |          |
|              |           | 0.91  | -    |          |          |
| 203705_s_at  | FZD7      | 2     | 1.88 | 7.20E-07 | 1.38E-05 |
|              |           | -     |      |          |          |
|              |           | 0.91  | -    |          |          |
| 220085_at    | HELLS     | 2     | 1.88 | 3.75E-04 | 2.08E-03 |
|              |           | -     |      |          |          |
|              |           | 0.91  | -    |          |          |
| 227317_at    | LMCD1     | 3     | 1.88 | 1.61E-06 | 2.63E-05 |
|              |           | -     |      |          |          |
|              |           | 0.91  | -    |          |          |
| 201514_s_at  | G3BP1     | 5     | 1.89 | 3.81E-05 | 3.34E-04 |
|              |           | -     |      |          |          |
|              |           | 0.91  | -    |          |          |
| 224036_s_at  | LMBR1     | 6     | 1.89 | 1.20E-07 | 3.37E-06 |
|              |           | -     |      |          |          |
|              |           | 0.91  | -    |          |          |
| 201105_at    | LGALS1    | 6     | 1.89 | 3.79E-05 | 3.32E-04 |
|              |           | -     |      |          |          |
|              |           | 0.91  | -    |          |          |
| 229581_at    | ELFN1     | 7     | 1.89 | 1.72E-07 | 4.46E-06 |
|              |           | -     |      |          |          |
|              |           | 0.91  | -    |          |          |
| 228121_at    | TGFB2     | 7     | 1.89 | 2.39E-07 | 5.82E-06 |
|              |           | -     |      |          |          |
|              |           | 0.91  | -    |          |          |
| 208650_s_at  | CD24      | 8     | 1.89 | 2.62E-07 | 6.23E-06 |
|              |           | -     |      |          |          |
|              |           | 0.91  | -    |          |          |
| 214670_at    | ZKSCAN1   | 9     | 1.89 | 1.41E-03 | 5.96E-03 |
|              |           | -     |      |          |          |
|              |           | 0.91  | -    |          |          |
| 227443_at    | LURAP1L   | 9     | 1.89 | 4.98E-10 | 3.95E-08 |
|              |           | -     |      |          |          |
|              |           | 0.91  | -    |          |          |
| 224853_at    | SLAIN2    | -0.92 | 1.89 | 9.05E-06 | 1.05E-04 |
|              |           | -     |      |          |          |
|              |           | 0.91  | -    |          |          |
| 206004_at    | TGM3      | -0.92 | 1.89 | 6.86E-07 | 1.32E-05 |
|              |           | -     |      |          |          |
|              |           | 0.91  | -    |          |          |
| 223044_at    | SLC40A1   | -0.92 | 1.89 | 1.95E-14 | 7.66E-12 |
|              |           | -     |      |          |          |
|              |           | 0.92  | -    |          |          |
| 212154_at    | SDC2      | 1     | 1.89 | 9.85E-06 | 1.13E-04 |
|              |           | -     |      |          |          |
|              |           | 0.92  | -    |          |          |
| 1556820_a_at | DLEU2     | 1     | 1.89 | 7.71E-06 | 9.24E-05 |
|              |           | -     |      |          |          |
|              |           | 0.92  | -    |          |          |
| 218368_s_at  | TNFRSF12A | 1     | 1.89 | 1.50E-10 | 1.43E-08 |
|              |           | -     |      |          |          |
|              |           | 0.92  | -    |          |          |
| 219369_s_at  | OTUB2     | 2     | 1.89 | 5.82E-08 | 1.91E-06 |
|              |           | -     |      |          |          |
|              |           | 0.92  | -    |          |          |
| 242660_at    | C10orf112 | 2     | 1.89 | 8.56E-04 | 3.98E-03 |
|              |           | -     |      |          |          |
|              |           | 0.92  | -    |          |          |
| 219660_s_at  | ATP8A2    | 2     | 1.89 | 3.95E-06 | 5.43E-05 |
|              |           | -     |      |          |          |
|              |           | 0.92  | -1.9 | 1.50E-09 | 9.61E-08 |

|             |           |       |      |          |          |
|-------------|-----------|-------|------|----------|----------|
|             |           | 2     |      |          |          |
|             |           | -     |      |          |          |
| 210868_s_at | ELOVL6    | 0.92  |      |          |          |
|             |           | 2     | -1.9 | 8.61E-13 | 1.89E-10 |
|             |           | -     |      |          |          |
| 204182_s_at | ZBTB43    | 0.92  |      |          |          |
|             |           | 5     | -1.9 | 2.18E-04 | 1.35E-03 |
|             |           | -     |      |          |          |
| 205534_at   | PCDH7     | 0.92  |      |          |          |
|             |           | 7     | -1.9 | 4.26E-05 | 3.65E-04 |
| 209273_s_at | ISCA1     | -0.93 | -1.9 | 3.01E-11 | 3.73E-09 |
|             |           | -     |      |          |          |
| 205635_at   | KALRN     | -0.93 | 1.91 | 9.96E-07 | 1.78E-05 |
|             |           | -     |      |          |          |
| 201856_s_at | ZFR       | 0.93  | -    |          |          |
|             |           | 1     | 1.91 | 3.90E-10 | 3.19E-08 |
|             |           | -     |      |          |          |
| 226499_at   | NRARP     | 0.93  | -    |          |          |
|             |           | 2     | 1.91 | 2.41E-14 | 9.08E-12 |
|             |           | -     |      |          |          |
| 207233_s_at | MITF      | 0.93  | -    |          |          |
|             |           | 2     | 1.91 | 3.71E-07 | 8.14E-06 |
|             |           | -     |      |          |          |
| 200907_s_at | PALLD     | 0.93  | -    |          |          |
|             |           | 3     | 1.91 | 2.99E-09 | 1.73E-07 |
|             |           | -     |      |          |          |
| 220245_at   | SLC45A2   | 0.93  | -    |          |          |
|             |           | 3     | 1.91 | 3.19E-06 | 4.57E-05 |
|             |           | -     |      |          |          |
| 210276_s_at | TRIOBP    | 0.93  | -    |          |          |
|             |           | 3     | 1.91 | 4.15E-10 | 3.36E-08 |
|             |           | -     |      |          |          |
| 222833_at   | LPCAT2    | 0.93  | -    |          |          |
|             |           | 4     | 1.91 | 5.95E-07 | 1.17E-05 |
|             |           | -     |      |          |          |
| 244758_at   | SCAND3    | 0.93  | -    |          |          |
|             |           | 5     | 1.91 | 2.19E-08 | 8.65E-07 |
|             |           | -     |      |          |          |
| 208555_x_at | CST2      | 0.93  | -    |          |          |
|             |           | 6     | 1.91 | 4.38E-13 | 1.06E-10 |
|             |           | -     |      |          |          |
| 218888_s_at | NETO2     | 0.93  | -    |          |          |
|             |           | 6     | 1.91 | 5.04E-07 | 1.03E-05 |
|             |           | -     |      |          |          |
| 238688_at   | TPM1      | 0.93  | -    |          |          |
|             |           | 6     | 1.91 | 3.18E-07 | 7.23E-06 |
|             |           | -     |      |          |          |
| 219976_at   | HOOK1     | 0.93  | -    |          |          |
|             |           | 7     | 1.91 | 9.49E-09 | 4.33E-07 |
|             |           | -     |      |          |          |
| 223468_s_at | RGMA      | 0.93  | -    |          |          |
|             |           | 7     | 1.91 | 2.32E-06 | 3.55E-05 |
|             |           | -     |      |          |          |
| 201267_s_at | PSMC3     | 0.93  | -    |          |          |
|             |           | 8     | 1.92 | 5.68E-04 | 2.88E-03 |
|             |           | -     |      |          |          |
| 230068_s_at | PEG3-AS1  | 0.93  | -    |          |          |
|             |           | 9     | 1.92 | 1.49E-07 | 4.01E-06 |
|             |           | -     |      |          |          |
| 214697_s_at | PTBP3     | -0.94 | 1.92 | 8.47E-08 | 2.56E-06 |
|             |           | -     |      |          |          |
| 1558404_at  | LINC00622 | -0.94 | 1.92 | 1.86E-06 | 2.96E-05 |
|             |           | -     |      |          |          |
| 222874_s_at | CLN8      | -0.94 | 1.92 | 2.55E-11 | 3.25E-09 |
|             |           | -     |      |          |          |
| 228329_at   | DAB1      | -0.94 | 1.92 | 5.52E-04 | 2.82E-03 |



|              |                       |       |      |          |          |
|--------------|-----------------------|-------|------|----------|----------|
| 210057_at    | LOC101060589 /// SMG1 | -0.94 | 1.92 | 1.21E-03 | 5.26E-03 |
|              |                       | -     |      |          |          |
|              |                       | 0.94  | -    |          |          |
| 204730_at    | RIMS3                 | 3     | 1.92 | 2.53E-12 | 4.59E-10 |
|              |                       | -     |      |          |          |
|              |                       | 0.94  | -    |          |          |
| 1563900_at   | FAM83B                | 4     | 1.92 | 5.89E-04 | 2.96E-03 |
|              |                       | -     |      |          |          |
|              |                       | 0.94  | -    |          |          |
| 1555730_a_at | CFL1                  | 5     | 1.93 | 2.23E-05 | 2.18E-04 |
|              |                       | -     |      |          |          |
|              |                       | 0.94  | -    |          |          |
| 218980_at    | FHOD3                 | 5     | 1.93 | 9.49E-05 | 6.94E-04 |
|              |                       | -     |      |          |          |
|              |                       | 0.94  | -    |          |          |
| 1555074_a_at | KCNH5                 | 6     | 1.93 | 1.93E-05 | 1.94E-04 |
|              |                       | -     |      |          |          |
|              |                       | 0.94  | -    |          |          |
| 1554524_a_at | OLFM3                 | 6     | 1.93 | 4.20E-07 | 8.90E-06 |
|              |                       | -     |      |          |          |
|              |                       | 0.94  | -    |          |          |
| 207192_at    | DNASE1L2              | 7     | 1.93 | 1.56E-06 | 2.57E-05 |
|              |                       | -     |      |          |          |
|              |                       | 0.94  | -    |          |          |
| 215198_s_at  | CALD1                 | 8     | 1.93 | 4.18E-09 | 2.24E-07 |
|              |                       | -     |      |          |          |
|              |                       | 0.94  | -    |          |          |
| 231935_at    | ARPP21                | 8     | 1.93 | 8.99E-12 | 1.37E-09 |
|              |                       | -     |      |          |          |
|              |                       | 0.94  | -    |          |          |
| 241771_at    | RIMBP2                | 9     | 1.93 | 3.34E-08 | 1.21E-06 |
|              |                       | -     |      |          |          |
|              |                       | 0.95  | -    |          |          |
| 238775_at    | ITFG1                 | 1     | 1.93 | 2.09E-06 | 3.26E-05 |
|              |                       | -     |      |          |          |
|              |                       | 0.95  | -    |          |          |
| 221664_s_at  | F11R                  | 2     | 1.93 | 1.46E-10 | 1.40E-08 |
|              |                       | -     |      |          |          |
|              |                       | 0.95  | -    |          |          |
| 202341_s_at  | TRIM2                 | 2     | 1.93 | 2.26E-05 | 2.21E-04 |
|              |                       | -     |      |          |          |
|              |                       | 0.95  | -    |          |          |
| 203742_s_at  | LOC732360 /// TDG     | 2     | 1.93 | 1.59E-08 | 6.59E-07 |
|              |                       | -     |      |          |          |
|              |                       | 0.95  | -    |          |          |
| 238513_at    | PRRG4                 | 5     | 1.94 | 3.90E-08 | 1.36E-06 |
|              |                       | -     |      |          |          |
|              |                       | 0.95  | -    |          |          |
| 243910_x_at  | CAND1                 | 5     | 1.94 | 3.19E-05 | 2.89E-04 |
|              |                       | -     |      |          |          |
|              |                       | 0.95  | -    |          |          |
| 221920_s_at  | SLC25A37              | 6     | 1.94 | 2.67E-08 | 1.02E-06 |
|              |                       | -     |      |          |          |
|              |                       | 0.95  | -    |          |          |
| 1553711_a_at | FAM218A               | 7     | 1.94 | 8.63E-07 | 1.58E-05 |
|              |                       | -     |      |          |          |
|              |                       | 0.95  | -    |          |          |
| 200824_at    | GSTP1                 | 8     | 1.94 | 2.29E-05 | 2.23E-04 |
|              |                       | -     |      |          |          |
|              |                       | 0.95  | -    |          |          |
| 1556316_s_at | LOC284889             | 9     | 1.94 | 3.46E-06 | 4.88E-05 |
|              |                       | -     |      |          |          |
|              |                       | 0.96  | -    |          |          |
| 201418_s_at  | SOX4                  | 2     | 1.95 | 5.91E-06 | 7.48E-05 |
|              |                       | -     |      |          |          |
|              |                       | 0.96  | 1.95 | 6.58E-08 | 2.10E-06 |

|              |                                                        |       |      |          |          |
|--------------|--------------------------------------------------------|-------|------|----------|----------|
|              |                                                        | 2     |      |          |          |
|              |                                                        | -     |      |          |          |
| 219529_at    | CLIC3                                                  | 0.96  | -    |          |          |
|              |                                                        | 2     | 1.95 | 2.65E-08 | 1.01E-06 |
|              |                                                        | -     |      |          |          |
| 206376_at    | SLC6A15                                                | 0.96  | -    |          |          |
|              |                                                        | 3     | 1.95 | 5.11E-07 | 1.04E-05 |
|              |                                                        | -     |      |          |          |
| 231259_s_at  | CCND2                                                  | 0.96  | -    |          |          |
|              |                                                        | 4     | 1.95 | 9.20E-07 | 1.67E-05 |
|              |                                                        | -     |      |          |          |
| 241245_at    | SRSF4                                                  | 0.96  | -    |          |          |
|              |                                                        | 4     | 1.95 | 5.00E-05 | 4.15E-04 |
|              |                                                        | -     |      |          |          |
| 1554804_a_at | CLDN19                                                 | 0.96  | -    |          |          |
|              |                                                        | 6     | 1.95 | 9.63E-09 | 4.39E-07 |
|              |                                                        | -     |      |          |          |
| 208621_s_at  | EZR                                                    | 0.96  | -    |          |          |
|              |                                                        | 6     | 1.95 | 2.75E-04 | 1.62E-03 |
|              |                                                        | -     |      |          |          |
| 206137_at    | RIMS2                                                  | 0.96  | -    |          |          |
|              |                                                        | 7     | 1.96 | 8.11E-12 | 1.26E-09 |
|              |                                                        | -     |      |          |          |
| 226876_at    | FAM101B                                                | 0.96  | -    |          |          |
|              |                                                        | 7     | 1.96 | 8.11E-08 | 2.47E-06 |
|              |                                                        | -     |      |          |          |
| 225496_s_at  | SYTL2                                                  | 0.96  | -    |          |          |
|              |                                                        | 8     | 1.96 | 6.22E-08 | 2.01E-06 |
|              |                                                        | -     |      |          |          |
| 218677_at    | S100A14                                                | -0.97 | 1.96 | 9.06E-08 | 2.68E-06 |
|              |                                                        | -     |      |          |          |
| 204320_at    | COL11A1                                                | 0.97  | -    |          |          |
|              |                                                        | 1     | 1.96 | 1.11E-02 | 3.11E-02 |
|              |                                                        | -     |      |          |          |
| 231192_at    | LPAR3                                                  | 0.97  | -    |          |          |
|              |                                                        | 2     | 1.96 | 1.52E-16 | 1.45E-13 |
|              |                                                        | -     |      |          |          |
| 231771_at    | GJB6                                                   | 0.97  | -    |          |          |
|              |                                                        | 3     | 1.96 | 1.14E-12 | 2.35E-10 |
|              |                                                        | -     |      |          |          |
| 222506_at    | LMBR1                                                  | 0.97  | -    |          |          |
|              |                                                        | 4     | 1.96 | 3.54E-06 | 4.97E-05 |
|              |                                                        | -     |      |          |          |
| 232865_at    | AFF4                                                   | 0.97  | -    |          |          |
|              |                                                        | 4     | 1.96 | 3.60E-07 | 7.93E-06 |
|              |                                                        | -     |      |          |          |
| 234331_s_at  | FAM84A                                                 | 0.97  | -    |          |          |
|              |                                                        | 5     | 1.97 | 1.66E-07 | 4.35E-06 |
|              |                                                        | -     |      |          |          |
| 226390_at    | STARD4                                                 | 0.97  | -    |          |          |
|              |                                                        | 6     | 1.97 | 3.29E-06 | 4.69E-05 |
|              |                                                        | -     |      |          |          |
| 215599_at    | GUSBP3 /// GUSBP9 /// LOC100653061 ///<br>LOC101060519 | 0.97  | -    |          |          |
|              |                                                        | 6     | 1.97 | 5.54E-06 | 7.10E-05 |
|              |                                                        | -     |      |          |          |
| 201485_s_at  | RCN2                                                   | 0.97  | -    |          |          |
|              |                                                        | 6     | 1.97 | 4.33E-08 | 1.48E-06 |
|              |                                                        | -     |      |          |          |
| 242899_at    | SESN3                                                  | 0.97  | -    |          |          |
|              |                                                        | 7     | 1.97 | 3.98E-07 | 8.57E-06 |
|              |                                                        | -     |      |          |          |
| 211002_s_at  | TRIM29                                                 | 0.97  | -    |          |          |
|              |                                                        | 8     | 1.97 | 1.33E-05 | 1.43E-04 |
|              |                                                        | -     |      |          |          |
| 222784_at    | SMOC1                                                  | 0.97  | -    |          |          |
|              |                                                        | 9     | 1.97 | 1.19E-05 | 1.31E-04 |

|              |           |       |      |          |          |
|--------------|-----------|-------|------|----------|----------|
| 205255_x_at  | TCF7      | -0.98 | 1.97 | 5.84E-12 | 9.43E-10 |
|              |           | -     |      |          |          |
|              |           | 0.98  | -    |          |          |
| 220527_at    | MRPL20    | 1     | 1.97 | 5.56E-09 | 2.85E-07 |
|              |           | -     |      |          |          |
|              |           | 0.98  | -    |          |          |
| 202693_s_at  | STK17A    | 2     | 1.98 | 2.25E-09 | 1.35E-07 |
|              |           | -     |      |          |          |
|              |           | 0.98  | -    |          |          |
| 205334_at    | S100A1    | 2     | 1.98 | 3.16E-05 | 2.87E-04 |
|              |           | -     |      |          |          |
|              |           | 0.98  | -    |          |          |
| 211466_at    | NFIB      | 3     | 1.98 | 1.84E-06 | 2.94E-05 |
|              |           | -     |      |          |          |
|              |           | 0.98  | -    |          |          |
| 238789_at    | KANK1     | 4     | 1.98 | 8.58E-07 | 1.58E-05 |
|              |           | -     |      |          |          |
|              |           | 0.98  | -    |          |          |
| 1570511_at   | ARHGEF10L | 4     | 1.98 | 6.07E-08 | 1.97E-06 |
|              |           | -     |      |          |          |
|              |           | 0.98  | -    |          |          |
| 203367_at    | DUSP14    | 5     | 1.98 | 8.22E-15 | 3.66E-12 |
|              |           | -     |      |          |          |
|              |           | 0.98  | -    |          |          |
| 203243_s_at  | PDLIM5    | 5     | 1.98 | 1.25E-04 | 8.74E-04 |
|              |           | -     |      |          |          |
|              |           | 0.98  | -    |          |          |
| 231230_at    | KCNK10    | 6     | 1.98 | 2.52E-09 | 1.49E-07 |
|              |           | -     |      |          |          |
|              |           | 0.98  | -    |          |          |
| 203917_at    | CXADR     | 9     | 1.98 | 4.09E-05 | 3.55E-04 |
|              |           | -     |      |          |          |
|              |           | 0.98  | -    |          |          |
| 218574_s_at  | LMCD1     | -0.99 | 1.99 | 4.02E-08 | 1.40E-06 |
|              |           | -     |      |          |          |
|              |           | 0.99  | -    |          |          |
| 228636_at    | BHLHE22   | -0.99 | 1.99 | 1.89E-05 | 1.91E-04 |
|              |           | -     |      |          |          |
|              |           | 0.99  | -    |          |          |
| 201148_s_at  | TIMP3     | 4     | 1.99 | 3.13E-08 | 1.16E-06 |
|              |           | -     |      |          |          |
|              |           | 0.99  | -    |          |          |
| 235388_at    | CHD9      | 5     | 1.99 | 2.66E-05 | 2.52E-04 |
|              |           | -     |      |          |          |
|              |           | 0.99  | -    |          |          |
| 223278_at    | GJB2      | 5     | 1.99 | 1.13E-12 | 2.35E-10 |
|              |           | -     |      |          |          |
|              |           | 0.99  | -    |          |          |
| 210948_s_at  | LEF1      | 6     | 1.99 | 3.70E-10 | 3.10E-08 |
|              |           | -     |      |          |          |
|              |           | 0.99  | -    |          |          |
| 210943_s_at  | LYST      | 9     | -2   | 1.26E-05 | 1.37E-04 |
| 1555226_s_at | C1orf43   | -1    | -2   | 2.85E-06 | 4.19E-05 |
| 229097_at    | DIAPH3    | -1    | -2   | 1.15E-05 | 1.27E-04 |
| 238706_at    | PAPD4     | -1    | -2   | 6.61E-05 | 5.17E-04 |
| 210978_s_at  | TAGLN2    | -1    | -2   | 4.77E-05 | 4.00E-04 |
| 222354_at    | F11R      | -1    | -2   | 1.44E-06 | 2.41E-05 |
| 1553915_at   | C10orf126 | -1    | -2   | 3.64E-09 | 2.01E-07 |
| 235591_at    | SSTR1     | -1    | -2   | 4.98E-06 | 6.52E-05 |
|              |           | -     |      |          |          |
| 217893_s_at  | AKIRIN1   | -1    | 2.01 | 6.30E-06 | 7.84E-05 |
|              |           | -     |      |          |          |
| 230254_at    | FAM26E    | -1    | 2.01 | 7.52E-04 | 3.59E-03 |

|              |                        |       |      |          |          |
|--------------|------------------------|-------|------|----------|----------|
| 1554334_a_at | DNAJA4                 | -1    | 2.01 | 4.44E-12 | 7.46E-10 |
| 201846_s_at  | RYBP                   | -1    | 2.01 | 1.85E-06 | 2.95E-05 |
| 231858_x_at  | AP5B1                  | -1.01 | 2.01 | 2.96E-04 | 1.72E-03 |
| 231875_at    | KIF21A                 | -1.01 | 2.01 | 8.74E-10 | 6.20E-08 |
| 230498_at    | MCHR1                  | -1.01 | 2.01 | 2.48E-06 | 3.75E-05 |
| 223925_s_at  | MTPN                   | -1.01 | 2.02 | 1.54E-05 | 1.62E-04 |
| 229900_at    | CD109                  | -1.01 | 2.02 | 3.63E-11 | 4.34E-09 |
| 1558173_a_at | LUZP1                  | -1.01 | 2.02 | 1.32E-08 | 5.61E-07 |
| 210172_at    | SF1                    | -1.01 | 2.02 | 1.46E-03 | 6.10E-03 |
| 1557944_s_at | CTNND1 /// TMX2-CTNND1 | -1.01 | 2.02 | 4.74E-06 | 6.28E-05 |
| 215374_at    | PAPOLA                 | -1.01 | 2.02 | 4.81E-05 | 4.03E-04 |
| 1557910_at   | HSP90AB1               | -1.01 | 2.02 | 2.44E-04 | 1.48E-03 |
| 226623_at    | PHYHIPL                | -1.02 | 2.02 | 8.05E-09 | 3.83E-07 |
| 210393_at    | LGR5                   | -1.02 | 2.03 | 1.81E-09 | 1.14E-07 |
| 34478_at     | RAB11B                 | -1.02 | 2.03 | 1.11E-04 | 7.91E-04 |
| 215028_at    | SEMA6A                 | -1.02 | 2.03 | 5.37E-07 | 1.07E-05 |
| 224218_s_at  | TRPS1                  | -1.02 | 2.03 | 7.04E-07 | 1.35E-05 |
| 216641_s_at  | LAD1                   | -1.02 | 2.03 | 1.39E-07 | 3.80E-06 |
| 200835_s_at  | MAP4                   | -1.02 | 2.03 | 2.18E-05 | 2.14E-04 |
| 215268_at    | KIAA0754               | -1.02 | 2.03 | 7.95E-10 | 5.74E-08 |
| 233971_at    | FAM166A                | -1.03 | 2.04 | 1.10E-06 | 1.93E-05 |
| 225105_at    | C12orf75               | -1.03 | 2.04 | 5.16E-09 | 2.68E-07 |
| 202436_s_at  | CYP1B1                 | -1.03 | 2.04 | 7.35E-06 | 8.88E-05 |
| 242141_at    | HDAC2                  | -1.03 | 2.04 | 2.24E-10 | 2.01E-08 |
| 235057_at    | ITCH                   | -1.03 | 2.04 | 7.51E-05 | 5.75E-04 |
| 226599_at    | FHDC1                  | -1.03 | 2.04 | 1.53E-16 | 1.45E-13 |
| 222162_s_at  | ADAMTS1                | -1.03 | 2.04 | 1.47E-10 | 1.40E-08 |
| 226065_at    | PRICKLE1               | -1.03 | 2.05 | 4.50E-10 | 3.61E-08 |
| 228720_at    | SORCS2                 | -1.03 | 2.05 | 3.54E-07 | 7.85E-06 |
| 219225_at    | PGBD5                  | -1.03 | 2.05 | 8.04E-09 | 3.82E-07 |
| 217234_s_at  | EZR                    | -1.04 | 2.05 | 3.02E-05 | 2.77E-04 |
| 1553493_a_at | TDH                    | -1.04 | 2.06 | 4.89E-07 | 1.00E-05 |
| 226952_at    | EAF1                   | -1.04 | 2.06 | 4.31E-16 | 3.54E-13 |

|              |             |       |      |          |          |
|--------------|-------------|-------|------|----------|----------|
| 1555299_s_at | ERVW-1      | -1.04 | 2.06 | 5.76E-09 | 2.93E-07 |
| 222651_s_at  | TRPS1       | -1.05 | 2.07 | 2.49E-07 | 5.98E-06 |
| 228303_at    | GALNT6      | -1.05 | 2.07 | 2.32E-09 | 1.39E-07 |
| 227499_at    | FZD3        | -1.05 | 2.07 | 4.10E-11 | 4.80E-09 |
| 236241_at    | MED31       | -1.05 | 2.07 | 3.63E-04 | 2.02E-03 |
| 240024_at    | SEC14L2     | -1.06 | 2.08 | 4.70E-06 | 6.24E-05 |
| 214698_at    | PTBP3       | -1.06 | 2.08 | 9.45E-08 | 2.76E-06 |
| 1558732_at   | MAP4K4      | -1.06 | 2.08 | 8.74E-06 | 1.02E-04 |
| 203184_at    | FBN2        | -1.06 | 2.08 | 8.50E-05 | 6.37E-04 |
| 1559433_at   | APCDD1L-AS1 | -1.06 | 2.08 | 5.63E-08 | 1.86E-06 |
| 1553288_a_at | NYAP1       | -1.06 | 2.08 | 1.16E-09 | 7.81E-08 |
| 232149_s_at  | NSMAF       | -1.06 | 2.09 | 2.84E-08 | 1.07E-06 |
| 204378_at    | BCAS1       | -1.06 | 2.09 | 6.17E-09 | 3.08E-07 |
| 223690_at    | LTBP2       | -1.06 | 2.09 | 1.00E-09 | 6.90E-08 |
| 232069_at    | KIF26A      | -1.06 | 2.09 | 1.56E-09 | 9.91E-08 |
| 204736_s_at  | CSPG4       | -1.07 | 2.09 | 1.00E-07 | 2.89E-06 |
| 216504_s_at  | SLC39A8     | -1.07 | 2.09 | 3.91E-05 | 3.41E-04 |
| 226637_at    | UBE2H       | -1.07 | -2.1 | 1.35E-11 | 1.91E-09 |
| 228900_at    | SPECC1      | -1.07 | -2.1 | 1.86E-08 | 7.49E-07 |
| 207008_at    | CXCR2       | -1.07 | -2.1 | 6.68E-08 | 2.13E-06 |
| 209242_at    | PEG3        | -1.07 | -2.1 | 1.31E-06 | 2.24E-05 |
| 217230_at    | EZR         | -1.07 | -2.1 | 1.98E-05 | 1.98E-04 |
| 205592_at    | SLC4A1      | -1.07 | -2.1 | 3.97E-09 | 2.16E-07 |
| 220710_at    | ANP32A-IT1  | -1.07 | -2.1 | 1.67E-07 | 4.37E-06 |
| 236179_at    | CDH11       | -1.07 | 2.11 | 1.20E-04 | 8.41E-04 |
| 205125_at    | PLCD1       | -1.08 | 2.11 | 2.25E-12 | 4.16E-10 |
| 227524_at    | FZD3        | -1.08 | 2.11 | 1.16E-10 | 1.15E-08 |
| 204268_at    | S100A2      | -1.08 | 2.11 | 1.05E-08 | 4.67E-07 |
| 1564274_at   | C9orf47     | -1.08 | 2.12 | 2.53E-08 | 9.72E-07 |
| 200644_at    | MARCKSL1    | -1.08 | 2.12 | 1.04E-07 | 2.98E-06 |
| 216591_s_at  | SDHC        | -1.08 | 2.12 | 2.60E-04 | 1.55E-03 |
| 206774_at    | FRMPD1      | -1.08 | 2.12 | 2.03E-09 | 1.24E-07 |
| 203499_at    | EPHA2       | -1.08 | 2.12 | 2.21E-13 | 5.66E-11 |
| 216222_s_at  | MYO10       | -1.08 | 2.12 | 1.12E-06 | 1.96E-05 |
| 201616_s_at  | CALD1       | -1.09 | 2.12 | 1.00E-09 | 6.90E-08 |

|              |                       |       |      |          |          |
|--------------|-----------------------|-------|------|----------|----------|
| 235022_at    | FAM210A               | -1.09 | 2.13 | 1.02E-11 | 1.50E-09 |
| 211367_s_at  | CASP1                 | -1.09 | 2.13 | 3.01E-10 | 2.60E-08 |
| 203423_at    | RBP1                  | -1.09 | 2.13 | 1.26E-05 | 1.37E-04 |
| 208613_s_at  | FLNB                  | -1.09 | 2.13 | 1.52E-08 | 6.30E-07 |
| 226829_at    | AFAP1L2               | -1.09 | 2.13 | 5.52E-17 | 6.80E-14 |
| 1552511_a_at | CPA6                  | -1.09 | 2.13 | 9.05E-12 | 1.37E-09 |
| 219612_s_at  | FGG                   | -1.1  | 2.14 | 4.87E-06 | 6.41E-05 |
| 207649_at    | KRT37                 | -1.1  | 2.14 | 1.33E-02 | 3.61E-02 |
| 214104_at    | GPR161                | -1.1  | 2.14 | 2.19E-10 | 1.97E-08 |
| 1556821_x_at | DLEU2                 | -1.1  | 2.14 | 1.58E-05 | 1.65E-04 |
| 204132_s_at  | FOXO3 /// FOXO3B      | -1.1  | 2.14 | 1.66E-06 | 2.69E-05 |
| 227069_at    | CUX1                  | -1.1  | 2.14 | 4.15E-09 | 2.24E-07 |
| 232704_s_at  | LRRFIP2               | -1.1  | 2.14 | 9.48E-05 | 6.94E-04 |
| 1552626_a_at | TMEM163               | -1.1  | 2.15 | 5.74E-05 | 4.62E-04 |
| 206044_s_at  | BRAF                  | -1.1  | 2.15 | 2.13E-09 | 1.29E-07 |
| 1552685_a_at | GRHL1                 | -1.1  | 2.15 | 8.98E-10 | 6.32E-08 |
| 230204_at    | HAPLN1                | -1.11 | 2.15 | 2.13E-03 | 8.28E-03 |
| 1552487_a_at | BNC1                  | -1.11 | 2.16 | 1.24E-09 | 8.22E-08 |
| 203797_at    | VSNL1                 | -1.11 | 2.16 | 2.15E-11 | 2.84E-09 |
| 242163_at    | THRAP3                | -1.11 | 2.16 | 7.22E-06 | 8.74E-05 |
| 214939_x_at  | MLLT4                 | -1.12 | 2.17 | 3.82E-18 | 8.82E-15 |
| 200052_s_at  | ILF2                  | -1.12 | 2.17 | 5.51E-07 | 1.10E-05 |
| 219382_at    | SERTAD3               | -1.12 | 2.17 | 1.99E-09 | 1.23E-07 |
| 223078_s_at  | TMOD3                 | -1.12 | 2.17 | 4.13E-12 | 7.07E-10 |
| 242321_at    | PTPN14                | -1.12 | 2.17 | 1.30E-03 | 5.57E-03 |
| 208539_x_at  | SPRR2B                | -1.12 | 2.17 | 5.70E-04 | 2.88E-03 |
| 222774_s_at  | NETO2                 | -1.12 | 2.18 | 7.14E-09 | 3.47E-07 |
| 201559_s_at  | CLIC4                 | -1.12 | 2.18 | 1.45E-10 | 1.39E-08 |
| 210413_x_at  | SERPINB3 /// SERPINB4 | -1.12 | 2.18 | 1.51E-02 | 4.01E-02 |
| 1554333_at   | DNAJA4                | -1.12 | 2.18 | 1.07E-10 | 1.09E-08 |
| 221102_s_at  | TRPM6                 | -1.13 | 2.18 | 3.16E-10 | 2.71E-08 |
| 204181_s_at  | ZBTB43                | -1.13 | 2.18 | 3.83E-05 | 3.35E-04 |
| 239719_at    | CD109                 | -1.13 | 2.19 | 5.87E-11 | 6.42E-09 |

|              |                   |       |      |          |          |
|--------------|-------------------|-------|------|----------|----------|
| 236140_at    | GCLM              | -1.13 | 2.19 | 2.18E-05 | 2.15E-04 |
| 205941_s_at  | COL10A1           | -1.13 | 2.19 | 5.49E-09 | 2.83E-07 |
| 217924_at    | C6orf106          | -1.14 | -2.2 | 5.19E-08 | 1.73E-06 |
| 208055_s_at  | HERC4             | -1.14 | -2.2 | 1.98E-07 | 5.00E-06 |
| 1555247_a_at | FNIP1 /// RAPGEF6 | -1.14 | -2.2 | 8.10E-06 | 9.63E-05 |
| 221389_at    | PLA2G2E           | -1.14 | -2.2 | 3.60E-14 | 1.22E-11 |
| 229065_at    | SLC35F3           | -1.14 | 2.21 | 6.83E-07 | 1.32E-05 |
| 203691_at    | PI3               | -1.14 | 2.21 | 8.48E-03 | 2.52E-02 |
| 201445_at    | CNN3              | -1.14 | 2.21 | 3.31E-08 | 1.20E-06 |
| 202147_s_at  | IFRD1             | -1.15 | 2.21 | 3.21E-12 | 5.74E-10 |
| 1566465_at   | KCNK1             | -1.15 | 2.22 | 2.09E-06 | 3.25E-05 |
| 213456_at    | SOSTDC1           | -1.15 | 2.22 | 1.15E-10 | 1.15E-08 |
| 211538_s_at  | HSPA2             | -1.15 | 2.22 | 2.22E-15 | 1.35E-12 |
| 226968_at    | KIF1B             | -1.15 | 2.23 | 2.83E-07 | 6.63E-06 |
| 224941_at    | PAPPA             | -1.15 | 2.23 | 1.27E-07 | 3.53E-06 |
| 1555462_at   | PPP1R1C           | -1.16 | 2.23 | 1.66E-05 | 1.72E-04 |
| 213759_at    | ARL4C             | -1.16 | 2.23 | 2.18E-12 | 4.07E-10 |
| 213358_at    | SOGA2             | -1.16 | 2.23 | 3.35E-09 | 1.87E-07 |
| 219768_at    | VTCN1             | -1.16 | 2.24 | 2.97E-04 | 1.73E-03 |
| 208637_x_at  | ACTN1             | -1.17 | 2.24 | 6.03E-08 | 1.96E-06 |
| 37892_at     | COL11A1           | -1.17 | 2.24 | 8.48E-03 | 2.51E-02 |
| 209343_at    | EFHD1             | -1.17 | 2.24 | 2.86E-04 | 1.68E-03 |
| 211071_s_at  | MLLT11            | -1.17 | 2.25 | 3.32E-13 | 8.07E-11 |
| 221795_at    | NTRK2             | -1.17 | 2.25 | 1.90E-06 | 3.01E-05 |
| 205899_at    | CCNA1             | -1.17 | 2.25 | 1.06E-05 | 1.20E-04 |
| 224595_at    | SLC44A1           | -1.17 | 2.25 | 3.10E-09 | 1.76E-07 |
| 219956_at    | GALNT6            | -1.17 | 2.25 | 1.15E-09 | 7.75E-08 |
| 241412_at    | BTC               | -1.17 | 2.26 | 1.92E-06 | 3.03E-05 |
| 226767_s_at  | FAHD1             | -1.17 | 2.26 | 2.48E-07 | 5.96E-06 |
| 202206_at    | ARL4C             | -1.17 | 2.26 | 2.70E-10 | 2.36E-08 |
| 206448_at    | ZNF365            | -1.18 | 2.26 | 8.29E-06 | 9.82E-05 |
| 206758_at    | EDN2              | -1.18 | 2.26 | 3.37E-11 | 4.11E-09 |
| 203222_s_at  | TLE1              | -1.18 | 2.26 | 1.58E-09 | 9.97E-08 |
| 1552536_at   | VTI1A             | -1.18 | 2.26 | 5.87E-05 | 4.70E-04 |

|              |           |       |      |          |          |
|--------------|-----------|-------|------|----------|----------|
| 213385_at    | CHN2      | -1.18 | 2.26 | 9.91E-08 | 2.87E-06 |
| 201341_at    | ENC1      | -1.18 | 2.27 | 2.48E-07 | 5.97E-06 |
| 236700_at    | EIF3C     | -1.18 | 2.27 | 4.73E-05 | 3.97E-04 |
| 222783_s_at  | SMOC1     | -1.18 | 2.27 | 1.42E-07 | 3.86E-06 |
| 212807_s_at  | SORT1     | -1.18 | 2.27 | 1.63E-10 | 1.53E-08 |
| 224520_s_at  | BEST3     | -1.19 | 2.27 | 1.26E-06 | 2.16E-05 |
| 220518_at    | ABI3BP    | -1.19 | 2.28 | 4.07E-08 | 1.41E-06 |
| 226535_at    | ITGB6     | -1.19 | 2.28 | 1.99E-10 | 1.82E-08 |
| 229856_s_at  | PITHD1    | -1.19 | 2.28 | 3.40E-11 | 4.13E-09 |
| 1557122_s_at | GABRB2    | -1.19 | 2.28 | 3.24E-06 | 4.63E-05 |
| 209772_s_at  | CD24      | -1.19 | 2.28 | 1.56E-08 | 6.48E-07 |
| 210335_at    | RASSF9    | -1.19 | 2.28 | 3.74E-08 | 1.33E-06 |
| 1553710_at   | FAM218A   | -1.19 | 2.29 | 3.23E-07 | 7.31E-06 |
| 204790_at    | SMAD7     | -1.2  | 2.29 | 3.57E-11 | 4.28E-09 |
| 1556186_s_at | EMC1      | -1.2  | -2.3 | 1.83E-05 | 1.86E-04 |
| 205523_at    | HAPLN1    | -1.2  | -2.3 | 3.13E-04 | 1.80E-03 |
| 201147_s_at  | TIMP3     | -1.2  | -2.3 | 1.31E-07 | 3.61E-06 |
| 223427_s_at  | EPB41L4B  | -1.2  | -2.3 | 3.66E-08 | 1.30E-06 |
| 223879_s_at  | OXR1      | -1.21 | 2.31 | 9.18E-10 | 6.42E-08 |
| 211764_s_at  | UBE2D1    | -1.21 | 2.32 | 3.05E-15 | 1.76E-12 |
| 238460_at    | FAM83A    | -1.21 | 2.32 | 1.54E-12 | 3.05E-10 |
| 202883_s_at  | PPP2R1B   | -1.22 | 2.32 | 6.88E-15 | 3.27E-12 |
| 224277_at    | MOP-1     | -1.22 | 2.33 | 8.51E-12 | 1.31E-09 |
| 233555_s_at  | SULF2     | -1.22 | 2.33 | 1.50E-08 | 6.26E-07 |
| 41469_at     | PI3       | -1.22 | 2.33 | 7.25E-03 | 2.22E-02 |
| 203827_at    | WIPI1     | -1.22 | 2.33 | 1.12E-12 | 2.35E-10 |
| 208216_at    | DLX4      | -1.22 | 2.33 | 3.19E-07 | 7.26E-06 |
| 241193_at    | ETS2      | -1.22 | 2.33 | 2.22E-04 | 1.37E-03 |
| 201615_x_at  | CALD1     | -1.22 | 2.34 | 1.74E-07 | 4.50E-06 |
| 211361_s_at  | SERPINB13 | -1.23 | 2.34 | 3.32E-14 | 1.16E-11 |
| 207195_at    | CNTN6     | -1.23 | 2.34 | 1.33E-05 | 1.43E-04 |
| 206409_at    | TIAM1     | -1.23 | 2.35 | 8.52E-07 | 1.57E-05 |
| 202016_at    | MEST      | -1.23 | 2.35 | 1.89E-07 | 4.82E-06 |
| 200744_s_at  | GNB1      | -1.23 | 2.35 | 3.86E-15 | 2.10E-12 |



|             |           |       |      |          |          |
|-------------|-----------|-------|------|----------|----------|
| 239155_at   | CXADR     | -1.23 | 2.35 | 4.13E-09 | 2.23E-07 |
| 220999_s_at | CYFIP2    | -1.23 | 2.35 | 3.53E-08 | 1.27E-06 |
| 209098_s_at | JAG1      | -1.23 | 2.35 | 4.84E-12 | 8.05E-10 |
| 205535_s_at | PCDH7     | -1.23 | 2.35 | 8.80E-08 | 2.62E-06 |
| 228910_at   | CD82      | -1.24 | 2.36 | 4.87E-12 | 8.08E-10 |
| 223541_at   | HAS3      | -1.24 | 2.37 | 5.32E-10 | 4.13E-08 |
| 229163_at   | CAMK2N1   | -1.24 | 2.37 | 7.19E-05 | 5.55E-04 |
| 231395_at   | ATP8A2    | -1.24 | 2.37 | 2.56E-10 | 2.26E-08 |
| 209442_x_at | ANK3      | -1.24 | 2.37 | 4.43E-07 | 9.27E-06 |
| 223650_s_at | NRBF2     | -1.24 | 2.37 | 1.22E-12 | 2.48E-10 |
| 210387_at   | NCALD     | -1.24 | 2.37 | 4.73E-07 | 9.77E-06 |
| 217933_s_at | LAP3      | -1.25 | 2.37 | 4.04E-12 | 6.95E-10 |
| 205637_s_at | SH3GL3    | -1.25 | 2.37 | 2.06E-08 | 8.19E-07 |
| 230138_at   | NCS1      | -1.25 | 2.37 | 3.96E-12 | 6.88E-10 |
| 223503_at   | TMEM163   | -1.25 | 2.38 | 2.86E-05 | 2.66E-04 |
| 215150_at   | YOD1      | -1.25 | 2.38 | 3.75E-11 | 4.44E-09 |
| 235075_at   | DSG3      | -1.25 | 2.39 | 4.89E-14 | 1.56E-11 |
| 221114_at   | AMBN      | -1.26 | 2.39 | 3.88E-08 | 1.36E-06 |
| 222853_at   | FLRT3     | -1.26 | 2.39 | 9.76E-10 | 6.74E-08 |
| 242344_at   | GABRB2    | -1.26 | -2.4 | 5.12E-06 | 6.69E-05 |
| 228915_at   | DACH1     | -1.27 | 2.41 | 3.13E-06 | 4.50E-05 |
| 211219_s_at | LHX2      | -1.27 | 2.41 | 3.30E-07 | 7.42E-06 |
| 239586_at   | FAM83A    | -1.29 | 2.44 | 2.04E-10 | 1.85E-08 |
| 216258_s_at | SERPINB13 | -1.29 | 2.45 | 1.16E-09 | 7.81E-08 |
| 216604_s_at | SLC7A8    | -1.29 | 2.45 | 4.84E-09 | 2.54E-07 |
| 221425_s_at | ISCA1     | -1.29 | 2.45 | 5.28E-14 | 1.67E-11 |
| 205709_s_at | CDS1      | -1.3  | 2.46 | 2.24E-11 | 2.91E-09 |
| 1556421_at  | LOC286189 | -1.3  | 2.46 | 2.45E-07 | 5.91E-06 |
| 204733_at   | KLK6      | -1.3  | 2.46 | 3.24E-06 | 4.64E-05 |
| 201043_s_at | ANP32A    | -1.3  | 2.46 | 1.10E-09 | 7.50E-08 |
| 212531_at   | LCN2      | -1.3  | 2.47 | 6.36E-05 | 5.02E-04 |
| 221558_s_at | LEF1      | -1.31 | 2.47 | 6.65E-11 | 7.14E-09 |
| 241854_at   | DNASE1    | -1.31 | 2.47 | 2.07E-09 | 1.26E-07 |
| 212822_at   | HEG1      | -1.31 | -    | 3.85E-08 | 1.35E-06 |

|              |                     |       | 2.48 |          |          |
|--------------|---------------------|-------|------|----------|----------|
| 235479_at    | CPEB2               | -1.31 | 2.48 | 8.92E-11 | 9.40E-09 |
| 200906_s_at  | PALLD               | -1.31 | 2.48 | 1.26E-10 | 1.23E-08 |
| 212942_s_at  | KIAA1199            | -1.32 | 2.49 | 5.52E-15 | 2.93E-12 |
| 238593_at    | C11orf80            | -1.32 | 2.49 | 1.07E-05 | 1.21E-04 |
| 230469_at    | RTKN2               | -1.32 | -2.5 | 1.22E-05 | 1.34E-04 |
| 203798_s_at  | VSNL1               | -1.32 | -2.5 | 2.66E-10 | 2.33E-08 |
| 222015_at    | CSNK1E              | -1.32 | -2.5 | 4.57E-12 | 7.65E-10 |
| 205595_at    | DSG3                | -1.33 | 2.51 | 2.41E-09 | 1.43E-07 |
| 206089_at    | NELL1               | -1.33 | 2.51 | 1.82E-04 | 1.18E-03 |
| 228922_at    | SHF                 | -1.34 | 2.53 | 3.44E-11 | 4.17E-09 |
| 204751_x_at  | DSC2                | -1.34 | 2.53 | 1.65E-11 | 2.26E-09 |
| 214417_s_at  | FETUB               | -1.34 | 2.53 | 3.34E-09 | 1.87E-07 |
| 227410_at    | FAM43A              | -1.34 | 2.54 | 3.35E-14 | 1.16E-11 |
| 241985_at    | JMY                 | -1.34 | 2.54 | 4.72E-11 | 5.37E-09 |
| 228605_at    | UBXN2A              | -1.35 | 2.54 | 9.44E-10 | 6.57E-08 |
| 205525_at    | CALD1               | -1.35 | 2.55 | 3.07E-11 | 3.78E-09 |
| 215271_at    | TNN                 | -1.35 | 2.55 | 1.57E-04 | 1.04E-03 |
| 239028_at    | LYPD6               | -1.35 | 2.55 | 2.41E-11 | 3.11E-09 |
| 220800_s_at  | TMOD3               | -1.36 | 2.57 | 6.36E-12 | 1.01E-09 |
| 209875_s_at  | SPP1                | -1.36 | 2.57 | 3.04E-05 | 2.79E-04 |
| 1552807_a_at | SIGLEC10            | -1.36 | 2.57 | 1.03E-08 | 4.60E-07 |
| 232378_at    | SLC5A9              | -1.36 | 2.57 | 2.02E-07 | 5.10E-06 |
| 203650_at    | PROCR               | -1.37 | 2.58 | 6.49E-14 | 1.97E-11 |
| 233340_at    | SPINK13             | -1.37 | 2.59 | 5.86E-08 | 1.92E-06 |
| 217395_at    | MT4                 | -1.37 | 2.59 | 2.85E-11 | 3.59E-09 |
| 229228_at    | CREB5 /// LOC401317 | -1.38 | -2.6 | 8.23E-09 | 3.88E-07 |
| 206504_at    | CYP24A1             | -1.38 | -2.6 | 2.17E-07 | 5.41E-06 |
| 219842_at    | ARL15               | -1.39 | 2.61 | 5.16E-12 | 8.47E-10 |
| 206561_s_at  | AKR1B10             | -1.39 | 2.61 | 3.62E-05 | 3.20E-04 |
| 204705_x_at  | ALDOB               | -1.39 | 2.62 | 5.24E-10 | 4.09E-08 |
| 229271_x_at  | COL11A1             | -1.39 | 2.62 | 8.70E-04 | 4.03E-03 |
| 214636_at    | CALCB               | -1.4  | 2.63 | 3.19E-10 | 2.73E-08 |
| 226681_at    | UBE2H               | -1.4  | 2.63 | 7.84E-14 | 2.28E-11 |
| 223679_at    | CTNNB1              | -1.41 | 2.65 | 2.51E-10 | 2.22E-08 |

|              |                                                                                |       |      |          |          |
|--------------|--------------------------------------------------------------------------------|-------|------|----------|----------|
| 230276_at    | FAM49A                                                                         | -1.41 | 2.65 | 2.23E-08 | 8.79E-07 |
| 231743_at    | WNT3                                                                           | -1.41 | 2.66 | 6.56E-17 | 7.57E-14 |
| 212478_at    | RMND5A                                                                         | -1.41 | 2.66 | 1.01E-14 | 4.39E-12 |
| 208708_x_at  | EIF5                                                                           | -1.42 | 2.67 | 7.54E-18 | 1.27E-14 |
| 204351_at    | S100P                                                                          | -1.42 | 2.67 | 2.47E-07 | 5.95E-06 |
| 228068_at    | GOLGA7B                                                                        | -1.42 | 2.68 | 3.26E-13 | 8.02E-11 |
| 214226_at    | PRSS53                                                                         | -1.42 | 2.68 | 1.19E-12 | 2.43E-10 |
| 203354_s_at  | PSD3                                                                           | -1.42 | 2.68 | 2.46E-05 | 2.36E-04 |
| 200730_s_at  | PTP4A1                                                                         | -1.42 | 2.68 | 5.24E-10 | 4.09E-08 |
| 239203_at    | LSMEM1                                                                         | -1.43 | 2.69 | 3.78E-09 | 2.08E-07 |
| 226698_at    | FCHSD1                                                                         | -1.43 | -2.7 | 1.78E-11 | 2.40E-09 |
| 224724_at    | SULF2                                                                          | -1.43 | -2.7 | 6.14E-13 | 1.42E-10 |
| 1558687_a_at | FOXN1                                                                          | -1.44 | 2.71 | 1.37E-13 | 3.80E-11 |
| 236255_at    | PLEKHG4B                                                                       | -1.44 | 2.72 | 7.06E-11 | 7.56E-09 |
| 218384_at    | CARHSP1                                                                        | -1.45 | 2.72 | 4.22E-11 | 4.92E-09 |
| 212915_at    | PDZRN3                                                                         | -1.45 | 2.74 | 9.32E-12 | 1.39E-09 |
| 227650_at    | HSPA14                                                                         | -1.46 | 2.74 | 5.87E-09 | 2.96E-07 |
| 205676_at    | CYP27B1                                                                        | -1.46 | 2.75 | 7.69E-07 | 1.45E-05 |
| 244533_at    | PTPN14                                                                         | -1.46 | 2.75 | 3.07E-07 | 7.07E-06 |
| 220129_at    | CCDC169-SOHLH2 /// SOHLH2                                                      | -1.46 | 2.75 | 3.33E-08 | 1.21E-06 |
| 222871_at    | KLHDC8A                                                                        | -1.46 | 2.76 | 7.20E-10 | 5.30E-08 |
| 235683_at    | SESN3                                                                          | -1.46 | 2.76 | 3.05E-10 | 2.62E-08 |
| 203130_s_at  | KIF5C                                                                          | -1.47 | 2.77 | 4.10E-06 | 5.61E-05 |
| 215779_s_at  | HIST1H2BC /// HIST1H2BE /// HIST1H2BF /// HIST1H2BG<br>/// HIST1H2BI /// NCALD | -1.47 | 2.77 | 5.95E-08 | 1.94E-06 |
| 242138_at    | DLX1                                                                           | -1.47 | 2.78 | 5.38E-07 | 1.08E-05 |
| 220038_at    | C8orf44-SGK3 /// SGK3                                                          | -1.48 | 2.78 | 4.84E-08 | 1.63E-06 |
| 1556533_at   | LINC00868                                                                      | -1.48 | 2.79 | 8.07E-15 | 3.64E-12 |
| 210521_s_at  | FETUB                                                                          | -1.48 | 2.79 | 1.12E-10 | 1.12E-08 |
| 220984_s_at  | SLCO5A1                                                                        | -1.49 | -2.8 | 9.50E-09 | 4.34E-07 |
| 227955_s_at  | EFNA5                                                                          | -1.49 | 2.81 | 1.46E-14 | 6.07E-12 |
| 229942_at    | BNC2                                                                           | -1.5  | 2.83 | 2.23E-10 | 2.01E-08 |
| 236651_at    | KALRN                                                                          | -1.5  | 2.83 | 5.99E-06 | 7.56E-05 |
| 228996_at    | RC3H1                                                                          | -1.51 | 2.84 | 1.12E-12 | 2.35E-10 |
| 232361_s_at  | EHF                                                                            | -1.51 | 2.85 | 3.39E-06 | 4.81E-05 |

|              |                     |       |      |          |          |
|--------------|---------------------|-------|------|----------|----------|
| 1569852_at   | LSMEM1              | -1.51 | 2.86 | 7.62E-11 | 8.14E-09 |
| 1554097_a_at | MIR31HG             | -1.52 | 2.87 | 2.67E-14 | 9.87E-12 |
| 239726_at    | ANK3                | -1.52 | 2.87 | 3.06E-08 | 1.14E-06 |
| 213457_at    | MFHAS1              | -1.53 | -2.9 | 1.86E-14 | 7.50E-12 |
| 217799_x_at  | UBE2H               | -1.54 | -2.9 | 6.72E-13 | 1.54E-10 |
| 207291_at    | PRRG4               | -1.54 | 2.91 | 1.08E-10 | 1.09E-08 |
| 217428_s_at  | COL10A1             | -1.54 | 2.91 | 4.65E-07 | 9.65E-06 |
| 219463_at    | LAMP5               | -1.54 | 2.92 | 5.93E-10 | 4.56E-08 |
| 238568_s_at  | NPC1                | -1.55 | 2.92 | 1.74E-12 | 3.38E-10 |
| 236263_at    | SHH                 | -1.55 | 2.93 | 1.14E-08 | 5.03E-07 |
| 206140_at    | LHX2                | -1.55 | 2.93 | 5.78E-05 | 4.64E-04 |
| 230740_at    | EHD3                | -1.55 | 2.93 | 7.43E-10 | 5.44E-08 |
| 209126_x_at  | KRT6B               | -1.55 | 2.93 | 1.47E-08 | 6.16E-07 |
| 1553539_at   | KRT74               | -1.55 | 2.93 | 2.60E-11 | 3.30E-09 |
| 227950_at    | UBE2H               | -1.56 | 2.94 | 1.44E-14 | 6.05E-12 |
| 243541_at    | IL31RA              | -1.56 | 2.95 | 3.16E-05 | 2.87E-04 |
| 207367_at    | ATP12A              | -1.56 | 2.95 | 1.36E-05 | 1.46E-04 |
| 202435_s_at  | CYP1B1              | -1.56 | 2.95 | 4.25E-06 | 5.77E-05 |
| 228653_at    | SAMD5               | -1.56 | 2.96 | 3.62E-08 | 1.29E-06 |
| 201149_s_at  | TIMP3               | -1.58 | 2.98 | 1.63E-08 | 6.72E-07 |
| 237981_at    | CMYA5               | -1.58 | 2.98 | 1.10E-12 | 2.33E-10 |
| 201110_s_at  | THBS1               | -1.58 | 2.99 | 1.63E-09 | 1.03E-07 |
| 210689_at    | CLDN14              | -1.58 | 2.99 | 1.10E-10 | 1.10E-08 |
| 220782_x_at  | KLK12               | -1.58 | 2.99 | 2.93E-08 | 1.10E-06 |
| 239082_at    | FZD3                | -1.59 | -3   | 2.55E-09 | 1.51E-07 |
| 232170_at    | S100A7A             | -1.59 | 3.01 | 1.26E-02 | 3.46E-02 |
| 1553494_at   | TDH                 | -1.59 | 3.01 | 8.61E-07 | 1.58E-05 |
| 214590_s_at  | UBE2D1              | -1.6  | 3.02 | 6.90E-15 | 3.27E-12 |
| 209372_x_at  | TUBB2A /// TUBB2B   | -1.6  | 3.02 | 3.57E-15 | 1.97E-12 |
| 230135_at    | HHIP                | -1.6  | 3.04 | 1.23E-09 | 8.22E-08 |
| 203413_at    | NELL2               | -1.6  | 3.04 | 1.55E-07 | 4.12E-06 |
| 226122_at    | PLEKHG1             | -1.61 | 3.05 | 9.48E-16 | 6.26E-13 |
| 238741_at    | FAM83A              | -1.61 | 3.06 | 1.43E-13 | 3.91E-11 |
| 242329_at    | CREB5 /// LOC401317 | -1.63 | 3.09 | 6.83E-12 | 1.08E-09 |

|             |                   |       |      |          |          |
|-------------|-------------------|-------|------|----------|----------|
| 203535_at   | S100A9            | -1.64 | 3.11 | 4.22E-04 | 2.28E-03 |
| 200790_at   | ODC1              | -1.64 | 3.11 | 2.17E-13 | 5.63E-11 |
| 215034_s_at | TM4SF1            | -1.64 | 3.11 | 6.71E-10 | 5.09E-08 |
| 221416_at   | PLA2G2F           | -1.64 | 3.11 | 1.92E-15 | 1.23E-12 |
| 243478_at   | CHST2             | -1.64 | 3.12 | 4.76E-10 | 3.79E-08 |
| 234488_s_at | GMCL1 /// GMCL1P1 | -1.65 | 3.14 | 1.04E-12 | 2.22E-10 |
| 231778_at   | DLX3              | -1.65 | 3.15 | 1.12E-14 | 4.82E-12 |
| 225295_at   | SLC39A10          | -1.66 | 3.16 | 5.64E-14 | 1.77E-11 |
| 231867_at   | TENM2             | -1.66 | 3.16 | 1.72E-10 | 1.61E-08 |
| 220272_at   | BNC2              | -1.67 | 3.18 | 8.62E-10 | 6.14E-08 |
| 209387_s_at | TM4SF1            | -1.67 | 3.19 | 1.09E-10 | 1.10E-08 |
| 211906_s_at | SERPINB4          | -1.68 | 3.19 | 4.36E-03 | 1.48E-02 |
| 219250_s_at | FLRT3             | -1.68 | -3.2 | 3.36E-14 | 1.16E-11 |
| 205471_s_at | DACH1             | -1.69 | 3.22 | 1.42E-09 | 9.18E-08 |
| 226887_at   | HSPA14            | -1.69 | 3.22 | 3.97E-17 | 5.06E-14 |
| 227961_at   | CTSB              | -1.69 | 3.22 | 5.80E-09 | 2.93E-07 |
| 234316_x_at | KLK12             | -1.7  | 3.24 | 1.68E-10 | 1.58E-08 |
| 229084_at   | CNTN4             | -1.7  | 3.24 | 3.26E-07 | 7.35E-06 |
| 209683_at   | FAM49A            | -1.71 | 3.26 | 1.33E-10 | 1.30E-08 |
| 206882_at   | SLC1A6            | -1.71 | 3.27 | 2.09E-12 | 3.99E-10 |
| 218458_at   | GMCL1             | -1.72 | 3.29 | 1.39E-17 | 1.91E-14 |
| 237003_at   | BEST3             | -1.73 | 3.32 | 6.18E-09 | 3.08E-07 |
| 206604_at   | OVOL1             | -1.76 | 3.38 | 5.97E-13 | 1.39E-10 |
| 215785_s_at | CYFIP2            | -1.76 | 3.39 | 9.17E-15 | 4.03E-12 |
| 240389_at   | TRPM6             | -1.77 | -3.4 | 2.20E-09 | 1.32E-07 |
| 219683_at   | FZD3              | -1.77 | 3.41 | 4.04E-12 | 6.95E-10 |
| 206935_at   | PCDH8             | -1.77 | 3.41 | 8.02E-07 | 1.50E-05 |
| 223739_at   | PADI1             | -1.77 | 3.42 | 6.78E-10 | 5.11E-08 |
| 212479_s_at | RMND5A            | -1.78 | 3.43 | 4.89E-18 | 9.89E-15 |
| 206912_at   | FOXE1             | -1.78 | 3.43 | 1.52E-10 | 1.44E-08 |
| 242062_at   | SAMD8             | -1.78 | 3.43 | 7.72E-12 | 1.21E-09 |
| 213793_s_at | HOMER1            | -1.79 | 3.46 | 7.85E-14 | 2.28E-11 |
| 1553388_at  | FAM26D            | -1.8  | 3.47 | 5.84E-12 | 9.43E-10 |
| 1569433_at  | SAMD5             | -1.8  | 3.47 | 2.68E-12 | 4.81E-10 |

|              |            |       |      |          |          |
|--------------|------------|-------|------|----------|----------|
| 208290_s_at  | EIF5       | -1.8  | 3.48 | 5.74E-17 | 6.84E-14 |
| 208250_s_at  | DMBT1      | -1.8  | 3.49 | 9.70E-08 | 2.82E-06 |
| 220624_s_at  | ELF5       | -1.82 | 3.54 | 4.08E-14 | 1.35E-11 |
| 219554_at    | RHCG       | -1.83 | 3.54 | 2.63E-10 | 2.31E-08 |
| 1555774_at   | ZAR1       | -1.83 | 3.55 | 7.66E-16 | 5.55E-13 |
| 232555_at    | CREB5      | -1.84 | 3.57 | 1.04E-12 | 2.22E-10 |
| 213774_s_at  | PPP1R2     | -1.84 | 3.59 | 6.64E-15 | 3.27E-12 |
| 217031_at    | KRT84      | -1.85 | -3.6 | 6.18E-09 | 3.08E-07 |
| 217678_at    | SLC7A11    | -1.86 | 3.62 | 5.21E-11 | 5.84E-09 |
| 219301_s_at  | CNTNAP2    | -1.87 | 3.65 | 1.38E-10 | 1.33E-08 |
| 235723_at    | BNC2       | -1.87 | 3.65 | 3.65E-10 | 3.06E-08 |
| 1553574_at   | IFNE       | -1.87 | 3.66 | 4.18E-12 | 7.12E-10 |
| 225809_at    | PARM1      | -1.88 | 3.67 | 1.71E-12 | 3.34E-10 |
| 233814_at    | EFNA5      | -1.9  | 3.73 | 7.78E-13 | 1.74E-10 |
| 233586_s_at  | KLK12      | -1.9  | 3.73 | 1.33E-09 | 8.77E-08 |
| 232682_at    | MREG       | -1.9  | 3.74 | 6.06E-14 | 1.87E-11 |
| 1553829_at   | CYP1B1-AS1 | -1.9  | 3.74 | 2.59E-09 | 1.52E-07 |
| 216092_s_at  | SLC7A8     | -1.91 | 3.76 | 1.59E-14 | 6.52E-12 |
| 1557321_a_at | CAPN14     | -1.92 | 3.78 | 1.13E-11 | 1.65E-09 |
| 228975_at    | SP6        | -1.92 | 3.79 | 5.35E-18 | 9.89E-15 |
| 229030_at    | CAPN8      | -1.92 | 3.79 | 1.51E-07 | 4.06E-06 |
| 206326_at    | GRP        | -1.93 | 3.81 | 2.55E-04 | 1.53E-03 |
| 205290_s_at  | BMP2       | -1.93 | 3.81 | 1.68E-12 | 3.30E-10 |
| 243445_at    | BNC2       | -1.94 | 3.83 | 1.14E-10 | 1.14E-08 |
| 213880_at    | LGR5       | -1.94 | 3.85 | 6.21E-08 | 2.01E-06 |
| 233301_at    | OXCT2      | -1.96 | 3.89 | 7.03E-14 | 2.09E-11 |
| 223720_at    | SPINK7     | -1.96 | -3.9 | 4.32E-07 | 9.09E-06 |
| 237905_at    | KRT25      | -1.96 | -3.9 | 4.55E-05 | 3.85E-04 |
| 238625_at    | C1orf168   | -1.97 | 3.91 | 7.62E-13 | 1.72E-10 |
| 202752_x_at  | SLC7A8     | -1.97 | 3.93 | 4.52E-13 | 1.07E-10 |
| 202884_s_at  | PPP2R1B    | -1.97 | 3.93 | 2.17E-13 | 5.63E-11 |
| 214576_at    | KRT36      | -1.98 | 3.94 | 2.92E-14 | 1.06E-11 |
| 213107_at    | TNIK       | -2    | 4.01 | 7.86E-12 | 1.23E-09 |
| 1554593_s_at | SLC1A6     | -2.03 | 4.08 | 1.11E-09 | 7.51E-08 |

|              |                     |       |      |          |          |
|--------------|---------------------|-------|------|----------|----------|
| 1554592_a_at | SLC1A6              | -2.04 | 4.12 | 1.41E-12 | 2.82E-10 |
| 202886_s_at  | PPP2R1B             | -2.08 | 4.22 | 1.83E-12 | 3.52E-10 |
| 1553861_at   | TCP11L2             | -2.09 | 4.25 | 8.81E-18 | 1.42E-14 |
| 209757_s_at  | MYCN                | -2.09 | 4.27 | 7.76E-09 | 3.70E-07 |
| 209859_at    | TRIM9               | -2.1  | 4.29 | 1.53E-10 | 1.45E-08 |
| 222351_at    | PPP2R1B             | -2.11 | 4.31 | 3.85E-08 | 1.35E-06 |
| 205931_s_at  | CREB5 /// LOC401317 | -2.11 | 4.31 | 7.85E-13 | 1.75E-10 |
| 218935_at    | EHD3                | -2.11 | 4.32 | 2.06E-11 | 2.77E-09 |
| 232568_at    | MGC24103            | -2.18 | 4.52 | 1.91E-14 | 7.60E-12 |
| 209981_at    | CSDC2               | -2.19 | 4.57 | 8.54E-12 | 1.31E-09 |
| 205555_s_at  | MSX2                | -2.19 | 4.57 | 3.30E-13 | 8.07E-11 |
| 218266_s_at  | NCS1                | -2.2  | 4.59 | 9.20E-14 | 2.63E-11 |
| 209921_at    | SLC7A11             | -2.2  | 4.59 | 9.03E-13 | 1.97E-10 |
| 224412_s_at  | TRPM6               | -2.2  | 4.59 | 1.78E-11 | 2.40E-09 |
| 210082_at    | ABCA4               | -2.2  | 4.59 | 2.11E-12 | 4.00E-10 |
| 241014_at    | FLG-AS1             | -2.21 | 4.62 | 3.10E-11 | 3.79E-09 |
| 210319_x_at  | MSX2                | -2.21 | 4.62 | 8.22E-13 | 1.82E-10 |
| 205724_at    | PKP1                | -2.22 | 4.65 | 9.24E-19 | 2.84E-15 |
| 203921_at    | CHST2               | -2.22 | 4.67 | 1.86E-10 | 1.72E-08 |
| 221962_s_at  | UBE2H               | -2.23 | 4.69 | 8.47E-17 | 9.21E-14 |
| 224262_at    | IL1F10              | -2.23 | -4.7 | 1.01E-09 | 6.94E-08 |
| 233123_at    | SLC40A1             | -2.24 | 4.73 | 6.35E-12 | 1.01E-09 |
| 227506_at    | SLC16A9             | -2.29 | 4.88 | 9.61E-16 | 6.26E-13 |
| 205289_at    | BMP2                | -2.29 | -4.9 | 2.18E-13 | 5.63E-11 |
| 202166_s_at  | PPP1R2              | -2.34 | 5.05 | 6.93E-19 | 2.33E-15 |
| 209618_at    | CTNND2              | -2.35 | 5.09 | 1.01E-07 | 2.90E-06 |
| 210311_at    | FGF5                | -2.37 | 5.19 | 5.79E-14 | 1.80E-11 |
| 209617_s_at  | CTNND2              | -2.38 | -5.2 | 4.66E-10 | 3.72E-08 |
| 209800_at    | KRT16               | -2.38 | -5.2 | 1.05E-12 | 2.24E-10 |
| 231461_at    | KRT71               | -2.46 | -5.5 | 2.90E-06 | 4.25E-05 |
| 230722_at    | BNC2                | -2.46 | 5.51 | 2.69E-13 | 6.82E-11 |
| 213780_at    | TCHH                | -2.47 | 5.54 | 3.88E-06 | 5.36E-05 |
| 220090_at    | CRNN                | -2.49 | 5.61 | 9.47E-10 | 6.58E-08 |
| 207147_at    | DLX2                | -2.49 | 5.62 | 7.57E-10 | 5.51E-08 |
| 228646_at    | PPP1R1C             | -2.49 | -    | 3.11E-13 | 7.81E-11 |

|              |          |       | 5.63 |          |          |  |
|--------------|----------|-------|------|----------|----------|--|
|              |          |       | -    |          |          |  |
| 221627_at    | TRIM10   | -2.5  | 5.64 | 2.13E-12 | 4.01E-10 |  |
|              |          |       | -    |          |          |  |
| 213909_at    | LRRC15   | -2.52 | 5.72 | 1.35E-09 | 8.85E-08 |  |
|              |          |       | -    |          |          |  |
| 229823_at    | RIMS2    | -2.53 | 5.78 | 1.77E-11 | 2.40E-09 |  |
|              |          |       | -    |          |          |  |
| 202376_at    | SERPINA3 | -2.54 | 5.83 | 1.26E-09 | 8.36E-08 |  |
|              |          |       | -    |          |          |  |
| 237507_at    | KRT73    | -2.58 | 5.99 | 1.11E-09 | 7.53E-08 |  |
|              |          |       | -    |          |          |  |
| 211485_s_at  | FGF18    | -2.59 | 6.02 | 5.55E-15 | 2.93E-12 |  |
|              |          |       | -    |          |          |  |
| 227763_at    | LYPD6    | -2.62 | 6.16 | 8.28E-12 | 1.28E-09 |  |
|              |          |       | -    |          |          |  |
| 1553537_at   | KRT73    | -2.63 | 6.19 | 1.30E-12 | 2.63E-10 |  |
|              |          |       | -    |          |          |  |
| 211357_s_at  | ALDOB    | -2.63 | -6.2 | 4.23E-10 | 3.42E-08 |  |
|              |          |       | -    |          |          |  |
| 219932_at    | SLC27A6  | -2.64 | 6.24 | 6.60E-16 | 4.94E-13 |  |
|              |          |       | -    |          |          |  |
| 203304_at    | BAMBI    | -2.65 | 6.29 | 1.80E-10 | 1.67E-08 |  |
|              |          |       | -    |          |          |  |
| 205374_at    | SLN      | -2.67 | 6.37 | 6.21E-14 | 1.90E-11 |  |
|              |          |       | -    |          |          |  |
| 230493_at    | SHISA2   | -2.67 | 6.37 | 3.61E-08 | 1.29E-06 |  |
|              |          |       | -    |          |          |  |
| 228705_at    | CAPN12   | -2.75 | 6.75 | 8.33E-16 | 5.81E-13 |  |
|              |          |       | -    |          |          |  |
| 204687_at    | PARM1    | -2.76 | -6.8 | 1.01E-17 | 1.49E-14 |  |
|              |          |       | -    |          |          |  |
| 239572_at    | GJA3     | -2.78 | 6.86 | 7.25E-14 | 2.14E-11 |  |
|              |          |       | -    |          |          |  |
| 229158_at    | WNK4     | -2.78 | 6.88 | 2.50E-09 | 1.48E-07 |  |
|              |          |       | -    |          |          |  |
| 1564435_a_at | KRT72    | -2.79 | 6.94 | 4.68E-11 | 5.33E-09 |  |
|              |          |       | -    |          |          |  |
| 238478_at    | BNC2     | -2.81 | -7   | 3.45E-14 | 1.18E-11 |  |
|              |          |       | -    |          |          |  |
| 219832_s_at  | HOXC13   | -2.91 | 7.53 | 3.51E-18 | 8.64E-15 |  |
|              |          |       | -    |          |          |  |
| 204720_s_at  | DNAJC6   | -2.92 | 7.55 | 3.71E-16 | 3.12E-13 |  |
|              |          |       | -    |          |          |  |
| 211429_s_at  | SERPINA1 | -2.96 | 7.76 | 2.15E-11 | 2.84E-09 |  |
|              |          |       | -    |          |          |  |
| 207065_at    | KRT75    | -3.02 | -8.1 | 1.38E-11 | 1.94E-09 |  |
|              |          |       | -    |          |          |  |
| 229730_at    | SMTNL2   | -3.05 | 8.28 | 2.20E-11 | 2.89E-09 |  |
|              |          |       | -    |          |          |  |
| 1562628_at   | KRT40    | -3.05 | 8.31 | 7.93E-12 | 1.24E-09 |  |
|              |          |       | -    |          |          |  |
| 237732_at    | PRR9     | -3.09 | -8.5 | 2.14E-07 | 5.34E-06 |  |
|              |          |       | -    |          |          |  |
| 1555775_a_at | ZAR1     | -3.14 | 8.79 | 5.69E-15 | 2.95E-12 |  |
|              |          |       | -    |          |          |  |
| 219659_at    | ATP8A2   | -3.14 | 8.81 | 2.23E-12 | 4.15E-10 |  |
|              |          |       | -    |          |          |  |
| 231583_at    | KRT74    | -3.23 | 9.35 | 7.52E-08 | 2.33E-06 |  |
|              |          |       | -    |          |          |  |
| 202833_s_at  | SERPINA1 | -3.24 | 9.42 | 2.24E-11 | 2.91E-09 |  |
|              |          |       | -    |          |          |  |
| 220256_s_at  | OXCT2    | -3.29 | 9.77 | 5.18E-18 | 9.89E-15 |  |
|              |          |       | -    |          |          |  |
| 240388_at    | KRT27    | -3.31 | 9.92 | 7.10E-08 | 2.24E-06 |  |
|              |          |       | -    |          |          |  |
| 206994_at    | CST4     | -3.44 | 10.9 | 7.88E-15 | 3.59E-12 |  |
|              |          |       | -    |          |          |  |
| 227764_at    | LYPD6    | -3.48 | 11.1 | 5.97E-15 | 3.02E-12 |  |



|              |                                        |       |      |          |          |
|--------------|----------------------------------------|-------|------|----------|----------|
| 206987_x_at  | FGF18                                  | -3.48 | 11.2 | 4.82E-16 | 3.79E-13 |
| 211029_x_at  | FGF18                                  | -3.49 | 11.3 | 2.93E-15 | 1.72E-12 |
| 208092_s_at  | FAM49A                                 | -3.57 | 11.8 | 6.86E-15 | 3.27E-12 |
| 220635_at    | PSORS1C2                               | -3.63 | 12.4 | 1.08E-18 | 3.06E-15 |
| 205713_s_at  | COMP                                   | -3.94 | 15.4 | 1.94E-13 | 5.15E-11 |
| 230720_at    | RNF182                                 | -3.97 | 15.6 | 2.02E-15 | 1.26E-12 |
| 214284_s_at  | FGF18                                  | -4.05 | 16.6 | 6.75E-14 | 2.03E-11 |
| 214517_at    | KRTAP5-9                               | -4.06 | 16.7 | 6.44E-15 | 3.22E-12 |
| 232887_at    | PIRT                                   | -4.07 | 16.8 | 1.37E-16 | 1.41E-13 |
| 1554398_at   | LYG2                                   | -4.16 | 17.8 | 1.80E-17 | 2.38E-14 |
| 206027_at    | S100A3                                 | -4.19 | 18.2 | 6.02E-18 | 1.06E-14 |
| 231382_at    | FGF18                                  | -4.23 | 18.8 | 9.23E-16 | 6.26E-13 |
| 1564921_at   | KRTAP13-1                              | -4.37 | 20.7 | 1.63E-11 | 2.24E-09 |
| 207716_at    | KRT38                                  | -4.43 | 21.6 | 4.36E-14 | 1.40E-11 |
| 206423_at    | ANGPTL7                                | -4.46 | 21.9 | 2.30E-12 | 4.23E-10 |
| 220779_at    | PADI3                                  | -4.56 | 23.6 | 1.59E-12 | 3.15E-10 |
| 1562629_a_at | KRT40                                  | -4.78 | 27.5 | 1.46E-13 | 3.97E-11 |
| 242301_at    | CBLN2                                  | -4.86 | 29.1 | 5.64E-10 | 4.36E-08 |
| 237853_x_at  | KRTAP10-12                             | -5.04 | 32.9 | 7.30E-20 | 3.86E-16 |
| 206224_at    | CST1                                   | -5.06 | 33.4 | 4.31E-18 | 9.37E-15 |
| 207146_at    | KRT32                                  | -5.18 | 36.3 | 7.24E-15 | 3.36E-12 |
| 206677_at    | KRT31                                  | -5.25 | -38  | 4.41E-16 | 3.54E-13 |
| 215189_at    | KRT86 /// LOC100509764                 | -5.35 | 40.7 | 1.55E-13 | 4.18E-11 |
| 207670_at    | KRT85                                  | -5.65 | 50.1 | 9.22E-13 | 2.00E-10 |
| 233158_at    | KRT82                                  | -5.78 | 54.9 | 3.38E-16 | 2.98E-13 |
| 240967_at    | KRTAP19-3                              | -6.07 | 67.2 | 9.65E-16 | 6.26E-13 |
| 216921_s_at  | KRT35                                  | -6.16 | 71.5 | 3.08E-11 | 3.78E-09 |
| 234680_at    | KRTAP17-1                              | -6.25 | 76.3 | 1.87E-14 | 7.50E-12 |
| 219270_at    | CHAC1                                  | -6.27 | 77.4 | 5.72E-20 | 3.61E-16 |
| 234685_x_at  | KRTAP4-9                               | -6.44 | 86.5 | 7.27E-13 | 1.65E-10 |
| 233681_at    | KRTAP3-3                               | -6.5  | 90.5 | 4.35E-12 | 7.37E-10 |
| 233631_x_at  | KRTAP9-2 /// KRTAP9-8 /// LOC100996762 | -6.57 | -95  | 6.75E-13 | 1.54E-10 |
| 208532_x_at  | KRTAP5-8                               | -6.57 | 95.2 | 5.86E-20 | 3.61E-16 |
| 1560897_a_at | KRTAP10-11                             | -6.75 | 108  | 7.35E-17 | 8.23E-14 |

|              |                                         |       |     |          |          |
|--------------|-----------------------------------------|-------|-----|----------|----------|
| 234633_at    | KRTAP4-11                               | -6.76 | 108 | 9.71E-17 | 1.03E-13 |
| 1561330_at   | DSG4                                    | -6.76 | 109 | 9.23E-18 | 1.42E-14 |
| 1556410_a_at | KRTAP19-1                               | -6.76 | 109 | 5.75E-15 | 2.95E-12 |
| 213711_at    | KRT81                                   | -6.81 | 112 | 3.38E-18 | 8.64E-15 |
| 1564803_at   | KRTAP11-1                               | -6.84 | 114 | 2.92E-14 | 1.06E-11 |
| 206969_at    | KRT34 /// LOC100653049                  | -6.95 | 124 | 2.59E-14 | 9.66E-12 |
| 207669_at    | KRT83                                   | -7    | 128 | 1.34E-20 | 3.61E-16 |
| 234631_at    | KRTAP4-8                                | -7.02 | 130 | 2.55E-16 | 2.33E-13 |
| 234772_s_at  | KRTAP2-1 /// KRTAP2-2                   | -7.03 | 130 | 2.06E-13 | 5.43E-11 |
| 233534_at    | KRTAP3-2                                | -7.05 | 132 | 1.76E-13 | 4.71E-11 |
| 216810_at    | KRTAP4-7                                | -7.07 | 135 | 9.35E-14 | 2.66E-11 |
| 233537_at    | KRTAP3-1                                | -7.08 | 136 | 2.31E-13 | 5.89E-11 |
| 207457_s_at  | LY6G6D                                  | -7.2  | 147 | 3.65E-20 | 3.61E-16 |
| 220978_at    | KRTAP1-3                                | -7.28 | 155 | 1.39E-13 | 3.82E-11 |
| 220970_s_at  | KRTAP2-3 /// KRTAP2-4                   | -7.28 | 156 | 3.08E-14 | 1.10E-11 |
| 234678_at    | KRTAP4-3                                | -7.31 | 159 | 7.92E-16 | 5.63E-13 |
| 233533_at    | KRTAP1-5                                | -7.33 | 161 | 9.69E-14 | 2.73E-11 |
| 1564960_at   | KRTAP7-1                                | -7.35 | 164 | 3.60E-19 | 1.33E-15 |
| 234635_at    | KRTAP4-1                                | -7.42 | 172 | 4.30E-14 | 1.39E-11 |
| 220976_s_at  | KRTAP1-1                                | -7.44 | 173 | 4.09E-14 | 1.35E-11 |
| 234639_x_at  | KRTAP9-8                                | -7.52 | 184 | 2.13E-15 | 1.31E-12 |
| 234679_at    | KRTAP9-3                                | -7.58 | 192 | 6.68E-16 | 4.94E-13 |
| 224269_at    | KRTAP4-12                               | -7.59 | 192 | 2.95E-14 | 1.06E-11 |
| 208483_x_at  | KRT33A                                  | -7.6  | 194 | 3.00E-19 | 1.23E-15 |
| 207787_at    | KRT33B                                  | -7.61 | 195 | 7.28E-15 | 3.36E-12 |
| 233640_x_at  | KRTAP9-4                                | -7.62 | 197 | 3.47E-15 | 1.97E-12 |
| 234691_at    | KRTAP2-1                                | -7.62 | 197 | 6.17E-16 | 4.75E-13 |
| 234637_at    | KRTAP4-5                                | -7.63 | 197 | 1.38E-14 | 5.85E-12 |
| 234683_at    | KRTAP4-11 /// KRTAP4-6 /// LOC100134267 | -7.64 | 200 | 2.23E-14 | 8.49E-12 |
| 221297_at    | GPRC5D                                  | -7.78 | 219 | 5.32E-20 | 3.61E-16 |
| 234880_x_at  | KRTAP1-3                                | -7.88 | 235 | 1.93E-19 | 8.93E-16 |
| 220972_s_at  | KRTAP9-9                                | -7.92 | 242 | 3.54E-15 | 1.97E-12 |
| 1555673_at   | KRTAP2-3 /// KRTAP2-4                   | -8.07 | 268 | 1.43E-16 | 1.43E-13 |

|             |          |       |   |     |          |          |
|-------------|----------|-------|---|-----|----------|----------|
| 234671_at   | KRTAP4-2 | -8.15 | - | 284 | 3.49E-16 | 3.00E-13 |
| 234684_s_at | KRTAP4-4 | -8.24 | - | 301 | 2.58E-16 | 2.33E-13 |
| 1564974_at  | KRTAP8-1 | -8.65 | - | 401 | 3.14E-20 | 3.61E-16 |

### Supplemental Table 5. AAP v NC Differential Expression

| ProbeSetID   | GeneSymbol                | logFC | F    | p.value  | BH_fdr   |
|--------------|---------------------------|-------|------|----------|----------|
| 203915_at    | CXCL9                     | 3.2   | 9.16 | 5.15E-09 | 2.57E-06 |
| 204580_at    | MMP12                     | 3.09  | 8.54 | 9.76E-08 | 2.19E-05 |
| 204533_at    | CXCL10                    | 2.75  | 6.71 | 2.73E-07 | 4.68E-05 |
| 209924_at    | CCL18 /// LOC101060271    | 2.62  | 6.17 | 2.99E-06 | 2.67E-04 |
| 32128_at     | CCL18 /// LOC101060271    | 2.53  | 5.79 | 6.63E-06 | 4.70E-04 |
| 206407_s_at  | CCL13                     | 1.9   | 3.74 | 4.83E-07 | 7.34E-05 |
| 216714_at    | CCL13                     | 1.81  | 3.52 | 1.43E-06 | 1.55E-04 |
| 205758_at    | CD8A                      | 1.66  | 3.17 | 1.08E-09 | 9.25E-07 |
| 213537_at    | HLA-DPA1                  | 1.62  | 3.07 | 1.58E-06 | 1.66E-04 |
| 1405_i_at    | CCL5                      | 1.6   | 3.02 | 5.85E-10 | 6.26E-07 |
| 205987_at    | CD1C                      | 1.52  | 2.87 | 9.75E-09 | 4.09E-06 |
| 205821_at    | KLRC4-KLRK1 /// KLRK1     | 1.52  | 2.87 | 1.37E-09 | 1.01E-06 |
| 204655_at    | CCL5                      | 1.5   | 2.82 | 1.81E-09 | 1.26E-06 |
| 219386_s_at  | SLAMF8                    | 1.45  | 2.74 | 1.09E-07 | 2.37E-05 |
| 1558972_s_at | THEMIS                    | 1.43  | 2.69 | 6.60E-07 | 9.10E-05 |
| 206666_at    | GZMK                      | 1.36  | 2.57 | 5.04E-06 | 3.86E-04 |
| 205488_at    | GZMA                      | 1.35  | 2.55 | 2.02E-06 | 1.96E-04 |
| 206749_at    | CD1B                      | 1.34  | 2.54 | 1.57E-04 | 4.72E-03 |
| 223710_at    | CCL26                     | 1.31  | 2.49 | 1.73E-04 | 5.07E-03 |
| 205831_at    | CD2                       | 1.28  | 2.43 | 2.25E-07 | 4.17E-05 |
| 1552584_at   | IL12RB1                   | 1.25  | 2.38 | 6.17E-07 | 8.76E-05 |
| 205419_at    | GPR183                    | 1.22  | 2.33 | 3.26E-06 | 2.81E-04 |
| 226218_at    | IL7R                      | 1.21  | 2.32 | 8.50E-06 | 5.65E-04 |
| 217147_s_at  | TRAT1                     | 1.19  | 2.29 | 6.86E-05 | 2.59E-03 |
| 229437_at    | MIR155 /// MIR155HG       | 1.17  | 2.26 | 1.38E-06 | 1.52E-04 |
| 1559263_s_at | ZC3H12D                   | 1.15  | 2.22 | 2.05E-08 | 7.35E-06 |
| 220005_at    | P2RY13                    | 1.15  | 2.22 | 2.02E-07 | 3.85E-05 |
| 205890_s_at  | GABBR1 /// UBD            | 1.14  | 2.21 | 3.00E-05 | 1.42E-03 |
| 206637_at    | P2RY14                    | 1.13  | 2.2  | 2.26E-08 | 7.97E-06 |
| 209823_x_at  | HLA-DQB1 /// LOC101060835 | 1.12  | 2.17 | 1.25E-05 | 7.40E-04 |
| 211796_s_at  | TRBC1                     | 1.12  | 2.17 | 7.91E-06 | 5.35E-04 |
| 227346_at    | IKZF1                     | 1.11  | 2.17 | 6.05E-07 | 8.67E-05 |
| 216935_at    | LINC00302                 | 1.1   | 2.15 | 1.16E-03 | 1.87E-02 |
| 238725_at    | IRF1                      | 1.09  | 2.13 | 4.55E-06 | 3.58E-04 |
| 1552870_s_at | AXDND1                    | 1.09  | 2.13 | 2.95E-03 | 3.52E-02 |
| 206715_at    | TFEC                      | 1.09  | 2.13 | 4.19E-07 | 6.47E-05 |
| 207651_at    | GPR171                    | 1.09  | 2.13 | 2.12E-05 | 1.10E-03 |
| 206134_at    | ADAMDEC1                  | 1.08  | 2.11 | 1.07E-05 | 6.64E-04 |
| 216718_at    | LINC00302                 | 1.07  | 2.11 | 2.47E-03 | 3.13E-02 |
| 210915_x_at  | TRBC1                     | 1.07  | 2.1  | 1.81E-06 | 1.80E-04 |

|             |                           |       |      |          |          |
|-------------|---------------------------|-------|------|----------|----------|
| 229641_at   | CCBE1                     | 1.07  | 2.1  | 2.87E-06 | 2.60E-04 |
| 211657_at   | CEACAM6                   | 1.06  | 2.09 | 8.92E-04 | 1.57E-02 |
| 207861_at   | CCL22                     | 1.06  | 2.08 | 3.01E-05 | 1.42E-03 |
| 213193_x_at | TRBC1                     | 1.05  | 2.07 | 8.11E-06 | 5.45E-04 |
| 207430_s_at | MSMB                      | 1.05  | 2.07 | 4.39E-03 | 4.57E-02 |
| 213475_s_at | ITGAL                     | 1.04  | 2.06 | 5.96E-06 | 4.37E-04 |
| 244363_at   | ROS1                      | 1.04  | 2.06 | 8.89E-04 | 1.57E-02 |
| 214617_at   | PRF1                      | 1.04  | 2.05 | 2.65E-04 | 6.74E-03 |
| 204891_s_at | LCK                       | 1.04  | 2.05 | 1.25E-06 | 1.41E-04 |
| 227553_at   | PIK3R5                    | 1.04  | 2.05 | 7.89E-06 | 5.35E-04 |
| 224555_x_at | IL37                      | 1.03  | 2.04 | 6.48E-04 | 1.27E-02 |
| 213539_at   | CD3D                      | 1.02  | 2.03 | 2.01E-07 | 3.85E-05 |
| 1564786_at  | LOC338667                 | 1.01  | 2.02 | 1.45E-03 | 2.18E-02 |
| 219666_at   | MS4A6A                    | 1.01  | 2.01 | 1.31E-06 | 1.46E-04 |
| 227266_s_at | FYB                       | 1     | 2.01 | 1.78E-06 | 1.79E-04 |
| 242641_at   | COL6A6                    | 0.998 | 2    | 6.96E-04 | 1.33E-02 |
| 207466_at   | GAL                       | 0.997 | 2    | 4.69E-03 | 4.78E-02 |
| 211656_x_at | HLA-DQB1 /// LOC101060835 | 0.997 | 2    | 1.03E-05 | 6.46E-04 |
| 215049_x_at | CD163                     | 0.995 | 1.99 | 1.44E-05 | 8.24E-04 |
| 204205_at   | APOBEC3G                  | 0.993 | 1.99 | 3.21E-06 | 2.79E-04 |
| 211339_s_at | ITK                       | 0.991 | 1.99 | 7.47E-05 | 2.75E-03 |
| 236295_s_at | NLRC3                     | 0.991 | 1.99 | 3.00E-06 | 2.67E-04 |
| 213240_s_at | KRT4                      | 0.99  | 1.99 | 1.31E-03 | 2.03E-02 |
| 216920_s_at | TARP /// TRGC2            | 0.99  | 1.99 | 2.48E-04 | 6.48E-03 |
| 228362_s_at | FAM26F                    | 0.986 | 1.98 | 6.50E-05 | 2.49E-03 |
| 1553062_at  | MOGAT1                    | 0.977 | 1.97 | 2.16E-03 | 2.86E-02 |
| 220358_at   | BATF3                     | 0.974 | 1.96 | 8.34E-07 | 1.05E-04 |
| 205686_s_at | CD86                      | 0.97  | 1.96 | 3.02E-09 | 1.77E-06 |
| 210247_at   | SYN2                      | 0.969 | 1.96 | 2.66E-04 | 6.74E-03 |
| 216233_at   | CD163                     | 0.968 | 1.96 | 7.96E-05 | 2.89E-03 |
| 214038_at   | CCL8                      | 0.968 | 1.96 | 2.50E-04 | 6.52E-03 |
| 207277_at   | CD209                     | 0.965 | 1.95 | 1.13E-05 | 6.84E-04 |
| 1564474_at  | ZBED3-AS1                 | 0.963 | 1.95 | 5.67E-04 | 1.16E-02 |
| 229391_s_at | FAM26F                    | 0.962 | 1.95 | 8.49E-05 | 3.03E-03 |
| 214450_at   | CTSW                      | 0.961 | 1.95 | 4.31E-05 | 1.85E-03 |
| 214321_at   | NOV                       | 0.961 | 1.95 | 1.97E-04 | 5.51E-03 |
| 219607_s_at | MS4A4A                    | 0.96  | 1.95 | 1.07E-04 | 3.55E-03 |
| 210164_at   | GZMB                      | 0.96  | 1.94 | 4.99E-05 | 2.04E-03 |
| 231776_at   | EOMES                     | 0.958 | 1.94 | 2.59E-04 | 6.66E-03 |
| 244413_at   | CLECL1                    | 0.958 | 1.94 | 7.64E-06 | 5.20E-04 |
| 203416_at   | CD53                      | 0.957 | 1.94 | 1.04E-06 | 1.25E-04 |
| 236028_at   | IBSP                      | 0.953 | 1.94 | 9.48E-05 | 3.28E-03 |
| 220330_s_at | SAMSN1                    | 0.95  | 1.93 | 1.98E-04 | 5.52E-03 |

|             |                |       |      |          |          |
|-------------|----------------|-------|------|----------|----------|
| 204440_at   | CD83           | 0.946 | 1.93 | 1.68E-05 | 9.27E-04 |
| 230937_at   | LOC285835      | 0.946 | 1.93 | 5.65E-04 | 1.16E-02 |
| 210146_x_at | LILRB2         | 0.945 | 1.93 | 3.34E-04 | 8.04E-03 |
| 204446_s_at | ALOX5          | 0.943 | 1.92 | 5.73E-05 | 2.26E-03 |
| 236175_at   | TRIM55         | 0.943 | 1.92 | 2.21E-03 | 2.91E-02 |
| 206247_at   | MICB           | 0.942 | 1.92 | 6.04E-05 | 2.35E-03 |
| 229241_at   | LDHD           | 0.939 | 1.92 | 9.57E-04 | 1.65E-02 |
| 229390_at   | FAM26F         | 0.938 | 1.92 | 8.11E-05 | 2.92E-03 |
| 206932_at   | CH25H          | 0.934 | 1.91 | 9.99E-05 | 3.40E-03 |
| 214913_at   | ADAMTS3        | 0.934 | 1.91 | 6.71E-05 | 2.54E-03 |
| 44673_at    | SIGLEC1        | 0.925 | 1.9  | 9.30E-06 | 6.02E-04 |
| 236782_at   | SAMD3          | 0.923 | 1.9  | 2.37E-04 | 6.26E-03 |
| 215806_x_at | TARP /// TRGC2 | 0.922 | 1.89 | 4.32E-04 | 9.69E-03 |
| 209606_at   | CYTIP          | 0.919 | 1.89 | 1.62E-05 | 9.01E-04 |
| 203645_s_at | CD163          | 0.919 | 1.89 | 4.24E-05 | 1.82E-03 |
| 232428_at   | MOGAT2         | 0.912 | 1.88 | 4.06E-03 | 4.34E-02 |
| 204912_at   | IL10RA         | 0.91  | 1.88 | 3.44E-08 | 1.07E-05 |
| 206545_at   | CD28           | 0.909 | 1.88 | 8.95E-05 | 3.14E-03 |
| 206104_at   | ISL1           | 0.907 | 1.88 | 6.38E-07 | 8.90E-05 |
| 206082_at   | HCP5           | 0.907 | 1.87 | 2.76E-06 | 2.51E-04 |
| 230040_at   | ADAMTS18       | 0.906 | 1.87 | 6.94E-04 | 1.33E-02 |
| 209816_at   | PTCH1          | 0.903 | 1.87 | 3.14E-04 | 7.68E-03 |
| 214567_s_at | XCL1 /// XCL2  | 0.9   | 1.87 | 5.97E-06 | 4.37E-04 |
| 219594_at   | NINJ2          | 0.898 | 1.86 | 3.98E-07 | 6.29E-05 |
| 227645_at   | PIK3R5         | 0.896 | 1.86 | 8.18E-06 | 5.48E-04 |
| 206296_x_at | MAP4K1         | 0.896 | 1.86 | 2.24E-06 | 2.13E-04 |
| 230422_at   | FPR3           | 0.894 | 1.86 | 5.71E-05 | 2.25E-03 |
| 203761_at   | SLA            | 0.894 | 1.86 | 3.46E-07 | 5.61E-05 |
| 219836_at   | ZBED2          | 0.893 | 1.86 | 2.76E-04 | 6.94E-03 |
| 204714_s_at | F5             | 0.89  | 1.85 | 2.10E-03 | 2.81E-02 |
| 205364_at   | ACOX2          | 0.888 | 1.85 | 5.02E-03 | 4.98E-02 |
| 219519_s_at | SIGLEC1        | 0.887 | 1.85 | 4.51E-05 | 1.91E-03 |
| 203471_s_at | PLEK           | 0.885 | 1.85 | 5.30E-06 | 4.01E-04 |
| 230773_at   | ZNF385D        | 0.883 | 1.84 | 4.26E-04 | 9.61E-03 |
| 210184_at   | ITGAX          | 0.881 | 1.84 | 6.07E-06 | 4.40E-04 |
| 206227_at   | CILP           | 0.881 | 1.84 | 2.09E-03 | 2.81E-02 |
| 1562364_at  | GVINP1         | 0.88  | 1.84 | 1.01E-05 | 6.37E-04 |
| 208161_s_at | ABCC3          | 0.878 | 1.84 | 1.43E-06 | 1.55E-04 |
| 228869_at   | SNX20          | 0.877 | 1.84 | 3.32E-06 | 2.84E-04 |
| 227677_at   | JAK3           | 0.875 | 1.83 | 2.15E-05 | 1.11E-03 |
| 203757_s_at | CEACAM6        | 0.874 | 1.83 | 1.59E-03 | 2.34E-02 |
| 214012_at   | ERAP1          | 0.872 | 1.83 | 1.46E-03 | 2.19E-02 |
| 228094_at   | AMICA1         | 0.867 | 1.82 | 1.09E-06 | 1.30E-04 |

|             |                   |       |      |          |          |
|-------------|-------------------|-------|------|----------|----------|
| 226142_at   | GLIPR1            | 0.866 | 1.82 | 4.19E-06 | 3.35E-04 |
| 228532_at   | C1orf162          | 0.865 | 1.82 | 1.02E-06 | 1.24E-04 |
| 205269_at   | LCP2              | 0.861 | 1.82 | 2.53E-05 | 1.26E-03 |
| 205786_s_at | ITGAM             | 0.86  | 1.82 | 5.74E-05 | 2.26E-03 |
| 223343_at   | MS4A7             | 0.86  | 1.81 | 6.69E-04 | 1.30E-02 |
| 210889_s_at | FCGR2B            | 0.859 | 1.81 | 4.64E-06 | 3.63E-04 |
| 222945_x_at | OLAH              | 0.858 | 1.81 | 4.48E-03 | 4.64E-02 |
| 214339_s_at | MAP4K1            | 0.858 | 1.81 | 2.73E-06 | 2.49E-04 |
| 202953_at   | C1QB              | 0.856 | 1.81 | 2.52E-07 | 4.46E-05 |
| 214399_s_at | KRT4              | 0.855 | 1.81 | 2.87E-03 | 3.45E-02 |
| 207901_at   | IL12B             | 0.855 | 1.81 | 8.98E-05 | 3.15E-03 |
| 205101_at   | CIITA             | 0.854 | 1.81 | 9.75E-06 | 6.22E-04 |
| 220485_s_at | SIRPG             | 0.853 | 1.81 | 4.69E-05 | 1.95E-03 |
| 229510_at   | MS4A14            | 0.853 | 1.81 | 7.11E-05 | 2.65E-03 |
| 239427_at   | SLAMF1            | 0.848 | 1.8  | 9.37E-06 | 6.04E-04 |
| 211144_x_at | TARP /// TRGC2    | 0.848 | 1.8  | 2.74E-04 | 6.89E-03 |
| 236234_at   | PDE1A             | 0.846 | 1.8  | 1.07E-04 | 3.55E-03 |
| 229383_at   | 1-Mar             | 0.846 | 1.8  | 3.13E-06 | 2.75E-04 |
| 205067_at   | IL1B              | 0.844 | 1.8  | 4.49E-04 | 9.96E-03 |
| 235221_at   | CBLN3             | 0.843 | 1.79 | 3.17E-03 | 3.70E-02 |
| 206214_at   | PLA2G7            | 0.838 | 1.79 | 7.34E-04 | 1.38E-02 |
| 221978_at   | HLA-F             | 0.837 | 1.79 | 1.16E-05 | 6.98E-04 |
| 221080_s_at | DENND1C           | 0.836 | 1.79 | 1.26E-04 | 4.03E-03 |
| 211991_s_at | HLA-DPA1          | 0.835 | 1.78 | 7.95E-07 | 1.02E-04 |
| 214219_x_at | MAP4K1            | 0.835 | 1.78 | 1.62E-06 | 1.69E-04 |
| 214981_at   | POSTN             | 0.834 | 1.78 | 4.67E-05 | 1.95E-03 |
| 244385_at   | KDM4C             | 0.834 | 1.78 | 2.40E-04 | 6.32E-03 |
| 209813_x_at | TARP              | 0.833 | 1.78 | 3.70E-04 | 8.64E-03 |
| 227168_at   | MIAT              | 0.83  | 1.78 | 9.62E-05 | 3.31E-03 |
| 219385_at   | SLAMF8            | 0.83  | 1.78 | 1.82E-05 | 9.77E-04 |
| 206366_x_at | XCL1              | 0.827 | 1.77 | 2.31E-05 | 1.18E-03 |
| 210538_s_at | BIRC3             | 0.825 | 1.77 | 5.68E-04 | 1.16E-02 |
| 235557_at   | GPAT2             | 0.825 | 1.77 | 5.65E-04 | 1.16E-02 |
| 230983_at   | FAM129C           | 0.822 | 1.77 | 2.00E-03 | 2.72E-02 |
| 220560_at   | C11orf21          | 0.822 | 1.77 | 3.84E-05 | 1.69E-03 |
| 239237_at   | LOC100506776      | 0.817 | 1.76 | 7.93E-04 | 1.46E-02 |
| 210176_at   | TLR1              | 0.817 | 1.76 | 4.36E-06 | 3.45E-04 |
| 205180_s_at | ADAM8             | 0.817 | 1.76 | 3.31E-05 | 1.52E-03 |
| 205456_at   | CD3E              | 0.815 | 1.76 | 5.45E-07 | 8.06E-05 |
| 210038_at   | PRKCQ             | 0.812 | 1.76 | 3.12E-03 | 3.65E-02 |
| 239529_at   | C5orf20 /// TIFAB | 0.812 | 1.76 | 1.19E-06 | 1.37E-04 |
| 240197_at   | SYN2              | 0.812 | 1.76 | 2.58E-05 | 1.28E-03 |
| 205270_s_at | LCP2              | 0.811 | 1.75 | 5.32E-06 | 4.01E-04 |

|                  |                                           |       |      |          |          |
|------------------|-------------------------------------------|-------|------|----------|----------|
| 206785_s_at      | KLRC1 /// KLRC2                           | 0.81  | 1.75 | 3.62E-05 | 1.62E-03 |
| 228658_at        | MIAT                                      | 0.81  | 1.75 | 9.70E-04 | 1.67E-02 |
| 209498_at        | CEACAM1                                   | 0.808 | 1.75 | 2.57E-03 | 3.21E-02 |
| 209879_at        | SELPLG                                    | 0.804 | 1.75 | 2.35E-05 | 1.19E-03 |
| 209975_at        | CYP2E1                                    | 0.802 | 1.74 | 1.75E-04 | 5.07E-03 |
| 209734_at        | NCKAP1L                                   | 0.801 | 1.74 | 1.84E-07 | 3.64E-05 |
| 205291_at        | IL2RB                                     | 0.8   | 1.74 | 3.18E-05 | 1.47E-03 |
| 231930_at        | ELMOD1 /// LOC643923                      | 0.798 | 1.74 | 1.91E-03 | 2.64E-02 |
| 206761_at        | CD96                                      | 0.798 | 1.74 | 5.68E-05 | 2.24E-03 |
| 222134_at        | DDO                                       | 0.795 | 1.74 | 1.74E-04 | 5.07E-03 |
| 228381_at        | ATF7IP2 /// LOC100287628                  | 0.794 | 1.73 | 1.34E-03 | 2.07E-02 |
| 223562_at        | PARVG                                     | 0.794 | 1.73 | 3.62E-05 | 1.62E-03 |
| 1563369_at       | LINC00173                                 | 0.791 | 1.73 | 1.13E-03 | 1.85E-02 |
| 210163_at        | CXCL11                                    | 0.788 | 1.73 | 1.29E-03 | 2.01E-02 |
| 232311_at        | B2M                                       | 0.787 | 1.73 | 1.18E-05 | 7.11E-04 |
| 235080_at        | CLUAP1                                    | 0.785 | 1.72 | 2.23E-04 | 6.01E-03 |
| 206199_at        | CEACAM7                                   | 0.785 | 1.72 | 3.19E-03 | 3.71E-02 |
| 204614_at        | SERPINB2                                  | 0.783 | 1.72 | 7.33E-04 | 1.38E-02 |
| 31637_s_at       | NR1D1 /// THRA                            | 0.781 | 1.72 | 1.30E-03 | 2.02E-02 |
| 219045_at        | RHOF                                      | 0.779 | 1.72 | 5.19E-07 | 7.73E-05 |
| 228573_at        | ANTXR2                                    | 0.777 | 1.71 | 5.32E-04 | 1.12E-02 |
| 203828_s_at      | IL32                                      | 0.777 | 1.71 | 2.69E-05 | 1.31E-03 |
| 235175_at        | GBP4                                      | 0.777 | 1.71 | 6.42E-05 | 2.46E-03 |
| 204279_at        | PSMB9                                     | 0.776 | 1.71 | 1.94E-05 | 1.03E-03 |
| 229802_at        | WISP1                                     | 0.775 | 1.71 | 3.64E-04 | 8.57E-03 |
| 208885_at        | LCP1                                      | 0.774 | 1.71 | 1.91E-06 | 1.88E-04 |
| 222088_s_at      | SLC2A14 /// SLC2A3                        | 0.774 | 1.71 | 5.73E-04 | 1.17E-02 |
| 242268_at        | CELF2                                     | 0.774 | 1.71 | 1.29E-04 | 4.10E-03 |
| 210395_x_at      | MYL4                                      | 0.773 | 1.71 | 8.28E-04 | 1.49E-02 |
| 208438_s_at      | FGR                                       | 0.773 | 1.71 | 1.76E-05 | 9.55E-04 |
| 241981_at        | FAM20A                                    | 0.772 | 1.71 | 7.06E-04 | 1.35E-02 |
| 219890_at        | CLEC5A                                    | 0.769 | 1.7  | 1.06E-03 | 1.77E-02 |
| 239178_at        | FGF9                                      | 0.768 | 1.7  | 9.64E-05 | 3.31E-03 |
| 227609_at        | EPSTI1                                    | 0.766 | 1.7  | 2.81E-03 | 3.42E-02 |
| 206978_at        | CCR2                                      | 0.765 | 1.7  | 7.43E-04 | 1.39E-02 |
| 206914_at        | CRTAM                                     | 0.765 | 1.7  | 1.91E-05 | 1.02E-03 |
| 212671_s_at      | HLA-DQA1 /// HLA-DQA2 ///<br>LOC100509457 | 0.762 | 1.7  | 4.38E-03 | 4.57E-02 |
| 244572_at        | KY                                        | 0.761 | 1.69 | 7.59E-04 | 1.42E-02 |
| 208121_s_at      | PTPRO                                     | 0.759 | 1.69 | 1.61E-05 | 8.97E-04 |
| 230550_at        | MS4A6A                                    | 0.757 | 1.69 | 1.39E-04 | 4.34E-03 |
| 1559194_a_a<br>t | CLEC4GP1                                  | 0.756 | 1.69 | 4.49E-04 | 9.96E-03 |
| 215332_s_at      | CD8B /// LOC100996919                     | 0.755 | 1.69 | 3.16E-08 | 1.03E-05 |



|              |                |       |      |          |          |
|--------------|----------------|-------|------|----------|----------|
| 336_at       | TBXA2R         | 0.754 | 1.69 | 2.72E-03 | 3.34E-02 |
| 231093_at    | FCRL3          | 0.753 | 1.69 | 4.02E-04 | 9.22E-03 |
| 212587_s_at  | PTPRC          | 0.753 | 1.69 | 5.26E-04 | 1.11E-02 |
| 1556472_s_at | SCML4          | 0.751 | 1.68 | 2.08E-04 | 5.74E-03 |
| 226136_at    | GLIPR1         | 0.75  | 1.68 | 4.23E-06 | 3.37E-04 |
| 232581_x_at  | HIVEP3         | 0.748 | 1.68 | 1.81E-03 | 2.56E-02 |
| 213849_s_at  | PPP2R2B        | 0.745 | 1.68 | 4.92E-06 | 3.79E-04 |
| 204502_at    | SAMHD1         | 0.745 | 1.68 | 8.18E-06 | 5.48E-04 |
| 1553311_at   | C20orf197      | 0.743 | 1.67 | 1.09E-04 | 3.60E-03 |
| 206625_at    | PRPH2          | 0.742 | 1.67 | 4.70E-04 | 1.02E-02 |
| 230391_at    | CD84           | 0.742 | 1.67 | 5.28E-05 | 2.13E-03 |
| 227353_at    | TMC8           | 0.74  | 1.67 | 4.63E-04 | 1.02E-02 |
| 229597_s_at  | WDFY4          | 0.739 | 1.67 | 9.70E-06 | 6.21E-04 |
| 232081_at    | ABCG1          | 0.737 | 1.67 | 7.95E-05 | 2.89E-03 |
| 204014_at    | DUSP4          | 0.735 | 1.66 | 4.04E-04 | 9.26E-03 |
| 231898_x_at  | SOX2-OT        | 0.735 | 1.66 | 1.44E-03 | 2.16E-02 |
| 205859_at    | LY86           | 0.734 | 1.66 | 2.53E-04 | 6.56E-03 |
| 231124_x_at  | LY9            | 0.734 | 1.66 | 3.19E-04 | 7.79E-03 |
| 224451_x_at  | ARHGAP9        | 0.734 | 1.66 | 4.06E-05 | 1.76E-03 |
| 209969_s_at  | STAT1          | 0.733 | 1.66 | 4.04E-04 | 9.26E-03 |
| 205804_s_at  | TRAF3IP3       | 0.732 | 1.66 | 6.08E-04 | 1.22E-02 |
| 226603_at    | SAMD9L         | 0.732 | 1.66 | 8.48E-05 | 3.03E-03 |
| 207757_at    | ZFP2           | 0.73  | 1.66 | 1.41E-04 | 4.39E-03 |
| 1555993_at   | CACNA1D        | 0.729 | 1.66 | 3.47E-04 | 8.27E-03 |
| 204760_s_at  | NR1D1 /// THRA | 0.729 | 1.66 | 4.06E-03 | 4.34E-02 |
| 202957_at    | HCLS1          | 0.729 | 1.66 | 3.48E-05 | 1.57E-03 |
| 1557474_at   | LOC284578      | 0.727 | 1.66 | 4.59E-03 | 4.72E-02 |
| 212613_at    | BTN3A2         | 0.726 | 1.65 | 2.27E-03 | 2.96E-02 |
| 207957_s_at  | PRKCB          | 0.725 | 1.65 | 1.87E-03 | 2.61E-02 |
| 230782_at    | SORD           | 0.722 | 1.65 | 4.67E-05 | 1.95E-03 |
| 229534_at    | ACOT4          | 0.721 | 1.65 | 1.42E-03 | 2.15E-02 |
| 229218_at    | COL1A2         | 0.719 | 1.65 | 1.18E-03 | 1.89E-02 |
| 226612_at    | UBE2QL1        | 0.717 | 1.64 | 9.61E-05 | 3.31E-03 |
| 204122_at    | TYROBP         | 0.717 | 1.64 | 1.72E-05 | 9.43E-04 |
| 230753_at    | PATL2          | 0.716 | 1.64 | 1.14E-04 | 3.74E-03 |
| 244033_at    | CEP128         | 0.715 | 1.64 | 5.94E-05 | 2.32E-03 |
| 219723_x_at  | AGPAT3         | 0.714 | 1.64 | 2.20E-04 | 5.97E-03 |
| 39402_at     | IL1B           | 0.713 | 1.64 | 6.68E-04 | 1.30E-02 |
| 206623_at    | PDE6A          | 0.713 | 1.64 | 4.54E-03 | 4.68E-02 |
| 218795_at    | ACP6           | 0.712 | 1.64 | 1.25E-03 | 1.97E-02 |
| 215303_at    | DCLK1          | 0.711 | 1.64 | 1.25E-03 | 1.98E-02 |
| 210439_at    | ICOS           | 0.71  | 1.64 | 5.91E-04 | 1.20E-02 |

|                  |                            |       |      |          |          |
|------------------|----------------------------|-------|------|----------|----------|
| 229947_at        | PI15                       | 0.709 | 1.64 | 9.71E-04 | 1.67E-02 |
| 231581_at        | LINC00664                  | 0.708 | 1.63 | 2.48E-03 | 3.14E-02 |
| 226818_at        | MPEG1                      | 0.708 | 1.63 | 1.50E-06 | 1.60E-04 |
| 217478_s_at      | HLA-DMA                    | 0.708 | 1.63 | 6.25E-07 | 8.76E-05 |
| 202531_at        | IRF1                       | 0.708 | 1.63 | 1.15E-04 | 3.75E-03 |
| 206181_at        | SLAMF1                     | 0.706 | 1.63 | 6.22E-05 | 2.40E-03 |
| 1554704_at       | ATP8B3                     | 0.706 | 1.63 | 6.52E-06 | 4.64E-04 |
| 211734_s_at      | FCER1A                     | 0.706 | 1.63 | 6.34E-05 | 2.44E-03 |
| 229723_at        | TAGAP                      | 0.705 | 1.63 | 2.53E-03 | 3.19E-02 |
| 205997_at        | ADAM28                     | 0.704 | 1.63 | 4.84E-05 | 2.00E-03 |
| 211990_at        | HLA-DPA1                   | 0.703 | 1.63 | 2.79E-03 | 3.41E-02 |
| 214203_s_at      | PRODH                      | 0.702 | 1.63 | 3.35E-04 | 8.04E-03 |
| 210385_s_at      | ERAP1                      | 0.701 | 1.63 | 2.59E-03 | 3.22E-02 |
| 224356_x_at      | MS4A6A                     | 0.701 | 1.63 | 6.42E-06 | 4.59E-04 |
| 224357_s_at      | MS4A4A                     | 0.699 | 1.62 | 5.43E-05 | 2.17E-03 |
| 238567_at        | SGPP2                      | 0.698 | 1.62 | 2.35E-03 | 3.03E-02 |
| 1560396_at       | KLHL6                      | 0.698 | 1.62 | 2.56E-03 | 3.21E-02 |
| 212588_at        | PTPRC                      | 0.697 | 1.62 | 1.49E-05 | 8.45E-04 |
| 204959_at        | MNDA                       | 0.697 | 1.62 | 4.87E-04 | 1.05E-02 |
| 212873_at        | HMHA1                      | 0.697 | 1.62 | 3.02E-05 | 1.42E-03 |
| 214651_s_at      | HOXA10-HOXA9 /// HOXA9 /// |       |      |          |          |
|                  | MIR196B                    | 0.696 | 1.62 | 2.80E-04 | 7.00E-03 |
| 204994_at        | MX2                        | 0.696 | 1.62 | 1.93E-04 | 5.44E-03 |
| 210895_s_at      | CD86                       | 0.692 | 1.62 | 4.56E-06 | 3.58E-04 |
| 206576_s_at      | CEACAM1                    | 0.691 | 1.61 | 2.79E-03 | 3.40E-02 |
| 230440_at        | ZNF469                     | 0.69  | 1.61 | 2.32E-05 | 1.18E-03 |
| 209905_at        | HOXA10-HOXA9 /// HOXA9 /// |       |      |          |          |
|                  | MIR196B                    | 0.689 | 1.61 | 5.77E-04 | 1.18E-02 |
| 1560531_at       | LCE1B                      | 0.689 | 1.61 | 6.85E-04 | 1.32E-02 |
| 1559186_at       | PRKXP1                     | 0.688 | 1.61 | 1.66E-03 | 2.41E-02 |
| 231175_at        | BEND6                      | 0.687 | 1.61 | 4.45E-04 | 9.92E-03 |
| 219319_at        | HIF3A                      | 0.687 | 1.61 | 2.55E-03 | 3.20E-02 |
| 229649_at        | NRXN3                      | 0.686 | 1.61 | 2.08E-04 | 5.74E-03 |
| 206337_at        | CCR7                       | 0.685 | 1.61 | 7.32E-05 | 2.71E-03 |
| 244276_at        | KLB                        | 0.684 | 1.61 | 2.85E-03 | 3.45E-02 |
| 219616_at        | ACSS3                      | 0.684 | 1.61 | 5.30E-04 | 1.11E-02 |
| 223687_s_at      | LY6K                       | 0.681 | 1.6  | 2.14E-03 | 2.85E-02 |
| 1554240_a_a<br>t | ITGAL                      | 0.681 | 1.6  | 2.14E-05 | 1.11E-03 |
| 229634_at        | TMEM139                    | 0.681 | 1.6  | 2.72E-03 | 3.34E-02 |
| 204259_at        | MMP7                       | 0.681 | 1.6  | 1.75E-04 | 5.07E-03 |
| 206693_at        | IL7                        | 0.677 | 1.6  | 5.53E-05 | 2.20E-03 |
| 213479_at        | NPTX2                      | 0.677 | 1.6  | 1.43E-03 | 2.16E-02 |
| 1569886_a_a<br>t | GLB1L3                     | 0.676 | 1.6  | 9.23E-04 | 1.62E-02 |
| 229497_at        | ANKDD1A                    | 0.674 | 1.6  | 3.02E-05 | 1.42E-03 |

|             |                                                            |       |      |          |          |
|-------------|------------------------------------------------------------|-------|------|----------|----------|
| 225033_at   | ST3GAL1                                                    | 0.674 | 1.6  | 2.31E-05 | 1.18E-03 |
| 237974_at   | ABHD12B /// MIR4454                                        | 0.674 | 1.6  | 1.09E-05 | 6.72E-04 |
| 237493_at   | IL22RA2                                                    | 0.673 | 1.59 | 4.93E-06 | 3.80E-04 |
| 205098_at   | CCR1                                                       | 0.672 | 1.59 | 2.91E-05 | 1.39E-03 |
| 204197_s_at | RUNX3                                                      | 0.672 | 1.59 | 4.12E-07 | 6.40E-05 |
| 242286_at   | GRIN2A                                                     | 0.672 | 1.59 | 1.03E-04 | 3.47E-03 |
| 204153_s_at | MFNG                                                       | 0.67  | 1.59 | 1.46E-04 | 4.48E-03 |
| 207900_at   | CCL17                                                      | 0.67  | 1.59 | 8.37E-04 | 1.51E-02 |
| 219452_at   | DPEP2                                                      | 0.669 | 1.59 | 3.23E-05 | 1.49E-03 |
| 213603_s_at | RAC2                                                       | 0.668 | 1.59 | 4.75E-06 | 3.71E-04 |
| 208146_s_at | CPVL                                                       | 0.668 | 1.59 | 8.31E-05 | 2.98E-03 |
| 219820_at   | SLC6A16                                                    | 0.667 | 1.59 | 2.36E-03 | 3.04E-02 |
| 205295_at   | CKMT2                                                      | 0.667 | 1.59 | 1.05E-03 | 1.76E-02 |
| 229800_at   | DCLK1                                                      | 0.666 | 1.59 | 1.70E-03 | 2.44E-02 |
| 204411_at   | KIF21B                                                     | 0.665 | 1.59 | 3.31E-03 | 3.81E-02 |
| 206513_at   | AIM2                                                       | 0.665 | 1.59 | 1.20E-04 | 3.89E-03 |
| 232458_at   | COL3A1                                                     | 0.664 | 1.58 | 2.69E-03 | 3.32E-02 |
| 225701_at   | AKNA                                                       | 0.664 | 1.58 | 5.90E-06 | 4.33E-04 |
| 210607_at   | FLT3LG                                                     | 0.664 | 1.58 | 1.37E-04 | 4.30E-03 |
| 219799_s_at | DHRS9                                                      | 0.664 | 1.58 | 1.97E-03 | 2.70E-02 |
| 223280_x_at | MS4A6A                                                     | 0.663 | 1.58 | 2.04E-05 | 1.07E-03 |
| 236514_at   | ACOT8                                                      | 0.662 | 1.58 | 1.35E-05 | 7.91E-04 |
| 205213_at   | ACAP1                                                      | 0.658 | 1.58 | 1.45E-05 | 8.24E-04 |
| 206991_s_at | CCR5                                                       | 0.654 | 1.57 | 6.03E-06 | 4.39E-04 |
| 202524_s_at | SPOCK2                                                     | 0.654 | 1.57 | 1.03E-03 | 1.74E-02 |
| 218345_at   | TMEM176A                                                   | 0.652 | 1.57 | 2.06E-04 | 5.71E-03 |
| 208894_at   | HLA-DRA                                                    | 0.651 | 1.57 | 5.76E-04 | 1.18E-02 |
| 229779_at   | COL4A4                                                     | 0.651 | 1.57 | 4.36E-03 | 4.55E-02 |
| 226777_at   | ADAM12 /// ADAM12-OT1                                      | 0.651 | 1.57 | 3.62E-04 | 8.53E-03 |
| 210982_s_at | HLA-DRA                                                    | 0.65  | 1.57 | 2.79E-04 | 6.99E-03 |
| 204670_x_at | HLA-DRB1 /// HLA-DRB4 ///<br>LOC100507709 /// LOC100507714 | 0.65  | 1.57 | 1.47E-04 | 4.50E-03 |
| 236253_at   | ZNF546                                                     | 0.648 | 1.57 | 4.67E-04 | 1.02E-02 |
| 203485_at   | RTN1                                                       | 0.648 | 1.57 | 6.55E-04 | 1.28E-02 |
| 203547_at   | CD4                                                        | 0.647 | 1.57 | 6.01E-07 | 8.65E-05 |
| 230110_at   | MCOLN2                                                     | 0.645 | 1.56 | 4.19E-03 | 4.44E-02 |
| 227210_at   | SFMBT2                                                     | 0.644 | 1.56 | 1.00E-04 | 3.41E-03 |
| 235291_s_at | FLJ32255                                                   | 0.644 | 1.56 | 1.72E-03 | 2.46E-02 |
| 220014_at   | PRR16                                                      | 0.643 | 1.56 | 6.76E-04 | 1.31E-02 |
| 235597_s_at | RGPD1 /// RGPD2                                            | 0.641 | 1.56 | 4.41E-03 | 4.58E-02 |
| 225598_at   | SLC45A4                                                    | 0.641 | 1.56 | 6.68E-04 | 1.30E-02 |
| 238422_at   | LBX2-AS1                                                   | 0.64  | 1.56 | 2.86E-03 | 3.45E-02 |
| 237411_at   | ADAMTS6                                                    | 0.637 | 1.55 | 1.36E-03 | 2.09E-02 |

|                  |                                |       |      |          |          |
|------------------|--------------------------------|-------|------|----------|----------|
| 226474_at        | NLRC5                          | 0.634 | 1.55 | 4.94E-04 | 1.06E-02 |
| 211795_s_at      | FYB                            | 0.633 | 1.55 | 3.06E-04 | 7.52E-03 |
| 235742_at        | RHOC                           | 0.633 | 1.55 | 4.57E-05 | 1.92E-03 |
| 235518_at        | SLC8A1                         | 0.632 | 1.55 | 5.51E-04 | 1.14E-02 |
| 1568794_at       | LOC643355                      | 0.632 | 1.55 | 1.26E-03 | 1.98E-02 |
| 236995_x_at      | TFEC                           | 0.631 | 1.55 | 6.14E-07 | 8.76E-05 |
| 236270_at        | NFATC4                         | 0.63  | 1.55 | 8.93E-04 | 1.57E-02 |
| 204575_s_at      | MMP19                          | 0.63  | 1.55 | 4.35E-04 | 9.73E-03 |
| 207238_s_at      | PTPRC                          | 0.628 | 1.55 | 5.45E-04 | 1.13E-02 |
| 204629_at        | PARVB                          | 0.628 | 1.55 | 6.96E-04 | 1.33E-02 |
| 244598_at        | LCP2                           | 0.628 | 1.55 | 1.76E-04 | 5.09E-03 |
| 230631_s_at      | IL10RB-AS1                     | 0.628 | 1.55 | 6.98E-04 | 1.34E-02 |
| 203104_at        | CSF1R                          | 0.627 | 1.54 | 2.41E-06 | 2.26E-04 |
| 1559584_a_a<br>t | C16orf54                       | 0.627 | 1.54 | 2.31E-03 | 2.99E-02 |
| 35974_at         | LRMP                           | 0.627 | 1.54 | 7.48E-04 | 1.40E-02 |
| 211372_s_at      | IL1R2                          | 0.625 | 1.54 | 3.42E-03 | 3.89E-02 |
| 225353_s_at      | C1QC                           | 0.622 | 1.54 | 1.28E-05 | 7.54E-04 |
| 205266_at        | LIF                            | 0.622 | 1.54 | 2.58E-03 | 3.22E-02 |
| 241866_at        | SLC16A7                        | 0.622 | 1.54 | 7.62E-04 | 1.42E-02 |
| 44790_s_at       | KIAA0226L                      | 0.621 | 1.54 | 4.51E-04 | 1.00E-02 |
| 232024_at        | GIMAP2                         | 0.621 | 1.54 | 8.55E-05 | 3.04E-03 |
| 209426_s_at      | AMACR /// C1QTNF3 /// C1QTNF3- | 0.62  | 1.54 | 2.40E-03 | 3.07E-02 |
| 239929_at        | PM20D1                         | 0.618 | 1.53 | 3.15E-03 | 3.67E-02 |
| 222592_s_at      | ACSL5                          | 0.617 | 1.53 | 3.71E-03 | 4.10E-02 |
| 213418_at        | HSPA6                          | 0.617 | 1.53 | 1.45E-03 | 2.17E-02 |
| 209670_at        | TRAC                           | 0.616 | 1.53 | 1.43E-05 | 8.18E-04 |
| 215116_s_at      | DNM1                           | 0.615 | 1.53 | 1.24E-03 | 1.97E-02 |
| 205403_at        | IL1R2                          | 0.615 | 1.53 | 1.71E-04 | 5.02E-03 |
| 204057_at        | IRF8                           | 0.614 | 1.53 | 1.23E-03 | 1.96E-02 |
| 219232_s_at      | EGLN3                          | 0.614 | 1.53 | 3.85E-04 | 8.96E-03 |
| 1557283_a_a<br>t | ZNF519                         | 0.613 | 1.53 | 5.69E-04 | 1.16E-02 |
| 202075_s_at      | PLTP                           | 0.613 | 1.53 | 2.03E-05 | 1.07E-03 |
| 205432_at        | OVGP1                          | 0.613 | 1.53 | 1.79E-03 | 2.53E-02 |
| 204114_at        | NID2                           | 0.613 | 1.53 | 1.20E-03 | 1.92E-02 |
| 220532_s_at      | TMEM176B                       | 0.611 | 1.53 | 5.91E-05 | 2.31E-03 |
| 211742_s_at      | EVI2B                          | 0.61  | 1.53 | 3.19E-04 | 7.78E-03 |
| 228943_at        | MAP6                           | 0.609 | 1.52 | 2.50E-03 | 3.15E-02 |
| 218627_at        | DRAM1                          | 0.608 | 1.52 | 3.29E-04 | 7.96E-03 |
| 232543_x_at      | ARHGAP9                        | 0.608 | 1.52 | 9.11E-05 | 3.19E-03 |
| 207554_x_at      | TBXA2R                         | 0.607 | 1.52 | 5.09E-04 | 1.08E-02 |
| 224210_s_at      | PXMP4                          | 0.607 | 1.52 | 1.43E-03 | 2.16E-02 |
| 230480_at        | PIWIL4                         | 0.607 | 1.52 | 1.45E-04 | 4.48E-03 |

|             |                      |        |      |          |          |
|-------------|----------------------|--------|------|----------|----------|
| 221588_x_at | ALDH6A1              | 0.606  | 1.52 | 3.06E-03 | 3.60E-02 |
| 219734_at   | SIDT1                | 0.606  | 1.52 | 1.29E-04 | 4.08E-03 |
| 235574_at   | GBP4                 | 0.606  | 1.52 | 9.94E-05 | 3.40E-03 |
| 220309_at   | TTC22                | 0.605  | 1.52 | 2.71E-03 | 3.34E-02 |
| 235004_at   | RBM24                | 0.605  | 1.52 | 4.75E-03 | 4.83E-02 |
| 236886_at   | LOC100049716         | 0.605  | 1.52 | 2.09E-03 | 2.81E-02 |
| 217525_at   | OLFML1               | 0.603  | 1.52 | 1.09E-03 | 1.80E-02 |
| 204777_s_at | MAL                  | 0.601  | 1.52 | 4.05E-03 | 4.33E-02 |
| 223655_at   | CD163L1              | 0.601  | 1.52 | 3.77E-07 | 5.98E-05 |
| 203932_at   | HLA-DMB              | 0.6    | 1.52 | 1.85E-07 | 3.64E-05 |
| 231773_at   | ANGPTL1              | 0.598  | 1.51 | 1.10E-03 | 1.81E-02 |
| 230867_at   | COL6A6               | 0.598  | 1.51 | 1.30E-03 | 2.02E-02 |
| 209765_at   | ADAM19               | 0.598  | 1.51 | 8.43E-04 | 1.51E-02 |
| 216054_x_at | MYL4                 | 0.597  | 1.51 | 5.67E-04 | 1.16E-02 |
| 242517_at   | KISS1R               | 0.597  | 1.51 | 4.89E-04 | 1.05E-02 |
| 215051_x_at | AIF1                 | 0.597  | 1.51 | 6.67E-06 | 4.72E-04 |
| 210321_at   | GZMH                 | 0.596  | 1.51 | 8.74E-06 | 5.75E-04 |
| 227194_at   | FAM3B                | 0.595  | 1.51 | 3.57E-03 | 4.00E-02 |
| 229029_at   | CAMK4                | 0.595  | 1.51 | 2.88E-04 | 7.15E-03 |
| 210088_x_at | MYL4                 | 0.594  | 1.51 | 4.27E-03 | 4.50E-02 |
| 226743_at   | SLFN11               | 0.594  | 1.51 | 2.07E-05 | 1.08E-03 |
| 207415_at   | PLA2R1               | 0.594  | 1.51 | 1.63E-04 | 4.85E-03 |
| 235343_at   | VASH2                | 0.593  | 1.51 | 2.79E-03 | 3.41E-02 |
| 1564276_at  | C5orf56              | 0.593  | 1.51 | 1.93E-04 | 5.43E-03 |
| 226878_at   | HLA-DOA              | 0.593  | 1.51 | 1.29E-03 | 2.01E-02 |
| 209901_x_at | AIF1                 | 0.593  | 1.51 | 3.05E-05 | 1.43E-03 |
| 232792_at   | TRIM69               | 0.592  | 1.51 | 4.90E-04 | 1.05E-02 |
| 219574_at   | 1-Mar                | 0.591  | 1.51 | 1.45E-04 | 4.48E-03 |
| 223922_x_at | MS4A6A               | 0.59   | 1.51 | 8.95E-05 | 3.14E-03 |
| 41577_at    | PPP1R16B             | 0.59   | 1.51 | 3.33E-04 | 8.02E-03 |
| 244251_at   | LCP2                 | 0.589  | 1.5  | 1.17E-06 | 1.35E-04 |
| 226972_s_at | CCDC136              | 0.588  | 1.5  | 1.93E-03 | 2.66E-02 |
| 205159_at   | CSF2RB               | 0.587  | 1.5  | 5.70E-05 | 2.25E-03 |
| 37966_at    | PARVB                | 0.587  | 1.5  | 1.49E-03 | 2.22E-02 |
| 227285_at   | C1orf51              | 0.587  | 1.5  | 2.22E-03 | 2.92E-02 |
| 207072_at   | IL18RAP              | 0.587  | 1.5  | 7.08E-04 | 1.35E-02 |
| 226906_s_at | ARHGAP9              | 0.586  | 1.5  | 1.73E-05 | 9.47E-04 |
| 215807_s_at | PLXNB1               | -0.585 | -1.5 | 8.56E-04 | 1.53E-02 |
| 200906_s_at | PALLD                | -0.586 | -1.5 | 2.52E-04 | 6.56E-03 |
| 217787_s_at | GALNT2               | -0.586 | -1.5 | 1.08E-07 | 2.37E-05 |
| 203707_at   | LINC00921 /// ZNF263 | -0.587 | -1.5 | 9.10E-08 | 2.06E-05 |
| 210954_s_at | TSC22D2              | -0.587 | -1.5 | 5.64E-06 | 4.19E-04 |
| 240024_at   | SEC14L2              | -0.587 | -1.5 | 4.66E-03 | 4.77E-02 |

|                  |                  |        |       |          |          |
|------------------|------------------|--------|-------|----------|----------|
| 226168_at        | ZFAND2B          | -0.588 | -1.5  | 9.47E-05 | 3.28E-03 |
| 218916_at        | ZNF768           | -0.588 | -1.5  | 1.59E-05 | 8.90E-04 |
| 201148_s_at      | TIMP3            | -0.588 | -1.5  | 4.12E-04 | 9.39E-03 |
| 218574_s_at      | LMCD1            | -0.588 | -1.5  | 2.73E-04 | 6.88E-03 |
| 227069_at        | CUX1             | -0.589 | -1.5  | 1.07E-03 | 1.78E-02 |
| 238001_at        | KCTD6            | -0.589 | -1.5  | 5.51E-07 | 8.11E-05 |
| 201846_s_at      | RYBP             | -0.589 | -1.5  | 9.35E-04 | 1.63E-02 |
| 200644_at        | MARCKSL1         | -0.59  | -1.5  | 1.15E-03 | 1.86E-02 |
| 203499_at        | EPHA2            | -0.59  | -1.51 | 3.77E-06 | 3.09E-04 |
| 244118_at        | GABRA1           | -0.59  | -1.51 | 5.03E-05 | 2.05E-03 |
| 219229_at        | SLCO3A1          | -0.593 | -1.51 | 9.04E-07 | 1.12E-04 |
| 208978_at        | CRIP2            | -0.593 | -1.51 | 3.44E-06 | 2.92E-04 |
| 209873_s_at      | PKP3             | -0.595 | -1.51 | 1.68E-06 | 1.71E-04 |
| 210655_s_at      | FOXO3 /// FOXO3B | -0.596 | -1.51 | 1.26E-04 | 4.04E-03 |
| 222927_s_at      | CPLX3            | -0.596 | -1.51 | 5.77E-07 | 8.39E-05 |
| 239355_at        | GMCL1            | -0.597 | -1.51 | 5.75E-08 | 1.55E-05 |
| 220362_at        | PSORS1C1         | -0.597 | -1.51 | 6.38E-04 | 1.26E-02 |
| 219660_s_at      | ATP8A2           | -0.598 | -1.51 | 5.58E-04 | 1.15E-02 |
| 206137_at        | RIMS2            | -0.598 | -1.51 | 5.09E-05 | 2.06E-03 |
| 201183_s_at      | CHD4             | -0.6   | -1.52 | 1.02E-04 | 3.45E-03 |
| 204557_s_at      | DZIP1            | -0.6   | -1.52 | 2.55E-03 | 3.20E-02 |
| 204761_at        | USP6NL           | -0.601 | -1.52 | 2.05E-07 | 3.87E-05 |
| 217080_s_at      | HOMER2           | -0.601 | -1.52 | 2.83E-07 | 4.81E-05 |
| 221920_s_at      | SLC25A37         | -0.602 | -1.52 | 1.47E-04 | 4.50E-03 |
| 209126_x_at      | KRT6B            | -0.604 | -1.52 | 2.31E-04 | 6.14E-03 |
| 238741_at        | FAM83A           | -0.604 | -1.52 | 1.10E-04 | 3.63E-03 |
| 1555074_a_a<br>t | KCNH5            | -0.605 | -1.52 | 2.90E-03 | 3.48E-02 |
| 210417_s_at      | PI4KB            | -0.605 | -1.52 | 8.99E-04 | 1.58E-02 |
| 212816_s_at      | CBS              | -0.605 | -1.52 | 1.07E-04 | 3.55E-03 |
| 215198_s_at      | CALD1            | -0.608 | -1.52 | 1.27E-04 | 4.06E-03 |
| 221455_s_at      | WNT3             | -0.608 | -1.52 | 1.67E-09 | 1.21E-06 |
| 230830_at        | SLC51B           | -0.608 | -1.52 | 1.60E-05 | 8.93E-04 |
| 212157_at        | SDC2             | -0.609 | -1.53 | 1.36E-03 | 2.09E-02 |
| 209280_at        | MRC2             | -0.609 | -1.53 | 2.36E-06 | 2.22E-04 |
| 207826_s_at      | ID3              | -0.609 | -1.53 | 5.91E-07 | 8.56E-05 |
| 212942_s_at      | KIAA1199         | -0.609 | -1.53 | 1.17E-06 | 1.35E-04 |
| 207233_s_at      | MITF             | -0.609 | -1.53 | 4.08E-05 | 1.77E-03 |
| 211367_s_at      | CASP1            | -0.61  | -1.53 | 5.06E-04 | 1.08E-02 |
| 222153_at        | MYEF2            | -0.61  | -1.53 | 7.53E-04 | 1.41E-02 |
| 214877_at        | CDKAL1           | -0.611 | -1.53 | 1.88E-03 | 2.61E-02 |
| 231935_at        | ARPP21           | -0.611 | -1.53 | 1.44E-06 | 1.56E-04 |
| 222528_s_at      | SLC25A37         | -0.612 | -1.53 | 6.92E-05 | 2.60E-03 |

|                  |                                                                                           |        |       |          |          |
|------------------|-------------------------------------------------------------------------------------------|--------|-------|----------|----------|
| 206044_s_at      | BRAF                                                                                      | -0.612 | -1.53 | 1.03E-04 | 3.46E-03 |
| 211219_s_at      | LHX2                                                                                      | -0.612 | -1.53 | 2.85E-03 | 3.45E-02 |
| 224762_at        | SERINC2                                                                                   | -0.614 | -1.53 | 1.73E-06 | 1.75E-04 |
| 203904_x_at      | CD82                                                                                      | -0.614 | -1.53 | 6.37E-05 | 2.45E-03 |
| 1561030_at       | TMC7                                                                                      | -0.614 | -1.53 | 4.11E-04 | 9.37E-03 |
| 206191_at        | ENTPD3                                                                                    | -0.616 | -1.53 | 6.54E-04 | 1.28E-02 |
| 228293_at        | DEPDC7                                                                                    | -0.616 | -1.53 | 9.69E-07 | 1.19E-04 |
| 206367_at        | REN                                                                                       | -0.617 | -1.53 | 5.97E-04 | 1.20E-02 |
| 229290_at        | DAPL1                                                                                     | -0.617 | -1.53 | 7.92E-07 | 1.02E-04 |
| 209591_s_at      | BMP7                                                                                      | -0.617 | -1.53 | 1.18E-04 | 3.82E-03 |
| 205732_s_at      | NCOA2                                                                                     | -0.618 | -1.53 | 3.90E-06 | 3.18E-04 |
| 226858_at        | CSNK1E /// LOC100996460                                                                   | -0.618 | -1.53 | 7.07E-07 | 9.53E-05 |
| 244758_at        | SCAND3                                                                                    | -0.619 | -1.54 | 1.49E-04 | 4.52E-03 |
| 212662_at        | PVR                                                                                       | -0.619 | -1.54 | 2.58E-05 | 1.28E-03 |
| 220962_s_at      | PADI1                                                                                     | -0.622 | -1.54 | 1.24E-07 | 2.65E-05 |
| 219671_at        | HPCAL4                                                                                    | -0.623 | -1.54 | 1.64E-06 | 1.69E-04 |
| 216086_at        | SV2C                                                                                      | -0.624 | -1.54 | 8.93E-06 | 5.85E-04 |
| 224397_s_at      | TMTC1                                                                                     | -0.626 | -1.54 | 1.02E-03 | 1.73E-02 |
| 242583_at        | STON2                                                                                     | -0.626 | -1.54 | 1.22E-05 | 7.27E-04 |
| 1557034_s_a<br>t | LOC100134445 /// LOC100288778 ///<br>WASH1 /// WASH2P /// WASH3P ///<br>WASH5P /// WASH7P | -0.626 | -1.54 | 6.41E-04 | 1.26E-02 |
| 1568954_s_a<br>t | C16orf72                                                                                  | -0.627 | -1.54 | 2.10E-06 | 2.02E-04 |
| 226390_at        | STARD4                                                                                    | -0.628 | -1.55 | 1.72E-04 | 5.05E-03 |
| 205268_s_at      | ADD2                                                                                      | -0.63  | -1.55 | 5.36E-09 | 2.64E-06 |
| 219511_s_at      | SNCAIP                                                                                    | -0.63  | -1.55 | 4.77E-04 | 1.03E-02 |
| 209078_s_at      | TXN2                                                                                      | -0.631 | -1.55 | 2.11E-04 | 5.79E-03 |
| 230498_at        | MCHR1                                                                                     | -0.634 | -1.55 | 1.38E-03 | 2.11E-02 |
| 225950_at        | SAMD8                                                                                     | -0.634 | -1.55 | 2.14E-07 | 4.01E-05 |
| 211361_s_at      | SERPINB13                                                                                 | -0.635 | -1.55 | 1.56E-06 | 1.65E-04 |
| 235977_at        | LONRF2                                                                                    | -0.635 | -1.55 | 1.73E-04 | 5.07E-03 |
| 220244_at        | LINC00312                                                                                 | -0.635 | -1.55 | 1.74E-04 | 5.07E-03 |
| 203018_s_at      | SSX2IP                                                                                    | -0.636 | -1.55 | 3.47E-05 | 1.56E-03 |
| 232069_at        | KIF26A                                                                                    | -0.636 | -1.55 | 4.13E-05 | 1.78E-03 |
| 230464_at        | S1PR5                                                                                     | -0.636 | -1.55 | 6.71E-04 | 1.30E-02 |
| 229097_at        | DIAPH3                                                                                    | -0.638 | -1.56 | 9.33E-04 | 1.63E-02 |
| 208613_s_at      | FLNB                                                                                      | -0.639 | -1.56 | 4.20E-05 | 1.80E-03 |
| 207268_x_at      | ABI2                                                                                      | -0.64  | -1.56 | 1.04E-08 | 4.31E-06 |
| 205255_x_at      | TCF7                                                                                      | -0.64  | -1.56 | 2.10E-09 | 1.36E-06 |
| 213606_s_at      | ARHGDI                                                                                    | -0.641 | -1.56 | 6.72E-04 | 1.30E-02 |
| 1555007_s_a<br>t | WDR66                                                                                     | -0.641 | -1.56 | 3.11E-05 | 1.45E-03 |
| 1556316_s_a<br>t | LOC284889                                                                                 | -0.643 | -1.56 | 2.28E-05 | 1.17E-03 |
| 206427_s_at      | MLANA                                                                                     | -0.645 | -1.56 | 6.94E-05 | 2.60E-03 |

|              |                  |        |       |          |          |
|--------------|------------------|--------|-------|----------|----------|
| 220067_at    | SPTBN5           | -0.645 | -1.56 | 4.68E-03 | 4.77E-02 |
| 37425_g_at   | CCHCR1           | -0.647 | -1.57 | 1.64E-06 | 1.69E-04 |
| 211002_s_at  | TRIM29           | -0.647 | -1.57 | 8.65E-04 | 1.54E-02 |
| 220527_at    | MRPL20           | -0.647 | -1.57 | 8.65E-06 | 5.72E-04 |
| 239586_at    | FAM83A           | -0.649 | -1.57 | 3.29E-06 | 2.82E-04 |
| 231867_at    | TENM2            | -0.65  | -1.57 | 4.63E-04 | 1.02E-02 |
| 203798_s_at  | VSNL1            | -0.652 | -1.57 | 4.01E-05 | 1.75E-03 |
| 228786_at    | PTCHD3P1         | -0.652 | -1.57 | 3.79E-05 | 1.67E-03 |
| 226637_at    | UBE2H            | -0.652 | -1.57 | 6.70E-06 | 4.72E-04 |
| 1559256_at   | MAGI1            | -0.654 | -1.57 | 1.49E-06 | 1.60E-04 |
| 226590_at    | ZNF618           | -0.655 | -1.57 | 8.14E-04 | 1.48E-02 |
| 1553352_x_at | ERVW-1           | -0.655 | -1.57 | 7.22E-08 | 1.79E-05 |
| 204751_x_at  | DSC2             | -0.655 | -1.58 | 5.99E-05 | 2.34E-03 |
| 201105_at    | LGALS1           | -0.658 | -1.58 | 1.57E-03 | 2.31E-02 |
| 222784_at    | SMOC1            | -0.658 | -1.58 | 4.28E-03 | 4.50E-02 |
| 223679_at    | CTNNB1           | -0.658 | -1.58 | 1.76E-03 | 2.50E-02 |
| 215817_at    | SERPINB13        | -0.658 | -1.58 | 8.54E-07 | 1.07E-04 |
| 204132_s_at  | FOXO3 /// FOXO3B | -0.66  | -1.58 | 4.71E-04 | 1.02E-02 |
| 1552365_at   | SCIN             | -0.66  | -1.58 | 1.17E-03 | 1.88E-02 |
| 226952_at    | EAF1             | -0.662 | -1.58 | 3.26E-08 | 1.05E-05 |
| 232579_at    | LOC100134229     | -0.663 | -1.58 | 1.22E-05 | 7.26E-04 |
| 204903_x_at  | ATG4B            | -0.665 | -1.59 | 2.57E-06 | 2.37E-04 |
| 213439_x_at  | RUNDC3A          | -0.666 | -1.59 | 6.23E-07 | 8.76E-05 |
| 226767_s_at  | FAHD1            | -0.667 | -1.59 | 1.50E-03 | 2.23E-02 |
| 1553711_a_at | FAM218A          | -0.668 | -1.59 | 4.05E-04 | 9.28E-03 |
| 228527_s_at  | SLC25A37         | -0.668 | -1.59 | 7.44E-06 | 5.09E-04 |
| 222853_at    | FLRT3            | -0.67  | -1.59 | 2.82E-05 | 1.36E-03 |
| 226027_at    | SWI5             | -0.67  | -1.59 | 4.06E-07 | 6.36E-05 |
| 226535_at    | ITGB6            | -0.671 | -1.59 | 3.27E-05 | 1.50E-03 |
| 202744_at    | SLC20A2          | -0.671 | -1.59 | 8.38E-08 | 1.97E-05 |
| 202416_at    | DNAJC7           | -0.671 | -1.59 | 7.91E-07 | 1.02E-04 |
| 228284_at    | TLE1             | -0.672 | -1.59 | 4.09E-05 | 1.77E-03 |
| 201860_s_at  | PLAT             | -0.673 | -1.59 | 2.34E-05 | 1.19E-03 |
| 205595_at    | DSG3             | -0.674 | -1.6  | 2.10E-04 | 5.79E-03 |
| 220407_s_at  | TGFB2            | -0.674 | -1.6  | 2.77E-03 | 3.39E-02 |
| 204556_s_at  | DZIP1            | -0.674 | -1.6  | 9.36E-04 | 1.63E-02 |
| 226313_at    | C10orf35         | -0.676 | -1.6  | 2.50E-07 | 4.46E-05 |
| 239719_at    | CD109            | -0.677 | -1.6  | 3.47E-06 | 2.92E-04 |
| 206758_at    | EDN2             | -0.677 | -1.6  | 8.00E-05 | 2.90E-03 |
| 226494_at    | CAMSAP3          | -0.677 | -1.6  | 4.03E-06 | 3.28E-04 |
| 220011_at    | AUNIP            | -0.677 | -1.6  | 3.36E-05 | 1.53E-03 |
| 209243_s_at  | PEG3             | -0.679 | -1.6  | 8.87E-05 | 3.12E-03 |



|              |                     |        |       |          |          |
|--------------|---------------------|--------|-------|----------|----------|
| 202693_s_at  | STK17A              | -0.68  | -1.6  | 2.04E-05 | 1.07E-03 |
| 201616_s_at  | CALD1               | -0.68  | -1.6  | 4.92E-06 | 3.79E-04 |
| 201110_s_at  | THBS1               | -0.681 | -1.6  | 3.30E-03 | 3.80E-02 |
| 215547_at    | TSC22D2             | -0.683 | -1.61 | 1.50E-07 | 3.10E-05 |
| 206375_s_at  | HSPB3               | -0.685 | -1.61 | 7.08E-04 | 1.35E-02 |
| 231395_at    | ATP8A2              | -0.685 | -1.61 | 1.14E-04 | 3.74E-03 |
| 220489_s_at  | SERINC2             | -0.686 | -1.61 | 3.75E-05 | 1.66E-03 |
| 205428_s_at  | CALB2               | -0.688 | -1.61 | 6.58E-04 | 1.29E-02 |
| 206109_at    | FUT1                | -0.688 | -1.61 | 1.96E-08 | 7.17E-06 |
| 217109_at    | MUC4                | -0.689 | -1.61 | 4.21E-03 | 4.45E-02 |
| 213967_at    | RALYL               | -0.689 | -1.61 | 7.16E-05 | 2.66E-03 |
| 214417_s_at  | FETUB               | -0.69  | -1.61 | 3.27E-03 | 3.78E-02 |
| 1555151_s_at | TDH                 | -0.692 | -1.62 | 8.07E-07 | 1.03E-04 |
| 235022_at    | FAM210A             | -0.693 | -1.62 | 2.49E-07 | 4.46E-05 |
| 214168_s_at  | TJP1                | -0.693 | -1.62 | 1.12E-05 | 6.83E-04 |
| 206426_at    | MLANA               | -0.695 | -1.62 | 7.25E-06 | 4.97E-04 |
| 1553691_at   | B3GALNT2            | -0.696 | -1.62 | 6.45E-08 | 1.67E-05 |
| 222783_s_at  | SMOC1               | -0.696 | -1.62 | 5.93E-04 | 1.20E-02 |
| 1556037_s_at | HHIP                | -0.697 | -1.62 | 4.93E-05 | 2.02E-03 |
| 212983_at    | HRAS                | -0.698 | -1.62 | 2.46E-07 | 4.46E-05 |
| 229942_at    | BNC2                | -0.698 | -1.62 | 6.55E-05 | 2.50E-03 |
| 211362_s_at  | SERPINB13           | -0.698 | -1.62 | 2.55E-07 | 4.47E-05 |
| 232568_at    | MGC24103            | -0.699 | -1.62 | 9.99E-05 | 3.40E-03 |
| 226681_at    | UBE2H               | -0.7   | -1.62 | 1.23E-06 | 1.39E-04 |
| 229228_at    | CREB5 /// LOC401317 | -0.702 | -1.63 | 3.47E-04 | 8.27E-03 |
| 206630_at    | TYR                 | -0.703 | -1.63 | 7.46E-05 | 2.75E-03 |
| 231875_at    | KIF21A              | -0.703 | -1.63 | 1.93E-06 | 1.88E-04 |
| 204730_at    | RIMS3               | -0.704 | -1.63 | 3.00E-09 | 1.77E-06 |
| 216629_at    | SRRM2               | -0.705 | -1.63 | 9.82E-06 | 6.22E-04 |
| 221803_s_at  | NRBF2               | -0.706 | -1.63 | 9.37E-08 | 2.11E-05 |
| 227961_at    | CTSB                | -0.707 | -1.63 | 4.98E-03 | 4.96E-02 |
| 243611_at    | MICALCL             | -0.708 | -1.63 | 6.47E-07 | 8.99E-05 |
| 223103_at    | STARD10             | -0.709 | -1.63 | 5.07E-07 | 7.62E-05 |
| 209679_s_at  | SMAGP               | -0.709 | -1.63 | 1.11E-07 | 2.38E-05 |
| 1554524_a_at | OLFM3               | -0.716 | -1.64 | 1.71E-04 | 5.02E-03 |
| 222774_s_at  | NETO2               | -0.717 | -1.64 | 7.24E-05 | 2.68E-03 |
| 212915_at    | PDZRN3              | -0.717 | -1.64 | 4.11E-04 | 9.37E-03 |
| 228303_at    | GALNT6              | -0.718 | -1.64 | 6.05E-06 | 4.39E-04 |
| 219529_at    | CLIC3               | -0.718 | -1.64 | 1.67E-05 | 9.23E-04 |
| 220782_x_at  | KLK12               | -0.718 | -1.64 | 3.15E-03 | 3.68E-02 |
| 213713_s_at  | GLB1L2              | -0.718 | -1.65 | 1.06E-06 | 1.27E-04 |
| 226829_at    | AFAP1L2             | -0.719 | -1.65 | 8.77E-11 | 1.67E-07 |

|              |                     |        |       |          |          |
|--------------|---------------------|--------|-------|----------|----------|
| 226187_at    | CDS1                | -0.72  | -1.65 | 8.17E-10 | 7.55E-07 |
| 216604_s_at  | SLC7A8              | -0.72  | -1.65 | 9.57E-04 | 1.65E-02 |
| 210276_s_at  | TRIOBP              | -0.722 | -1.65 | 7.56E-08 | 1.83E-05 |
| 224724_at    | SULF2               | -0.722 | -1.65 | 4.09E-07 | 6.37E-05 |
| 228720_at    | SORCS2              | -0.723 | -1.65 | 6.87E-04 | 1.32E-02 |
| 233555_s_at  | SULF2               | -0.724 | -1.65 | 6.61E-05 | 2.51E-03 |
| 217294_s_at  | ENO1                | -0.724 | -1.65 | 1.78E-03 | 2.52E-02 |
| 220203_at    | BMP8A               | -0.728 | -1.66 | 9.10E-09 | 3.94E-06 |
| 202147_s_at  | IFRD1               | -0.729 | -1.66 | 3.21E-07 | 5.32E-05 |
| 226623_at    | PHYHIPL             | -0.731 | -1.66 | 1.75E-05 | 9.51E-04 |
| 232914_s_at  | SYTL2               | -0.731 | -1.66 | 2.75E-05 | 1.34E-03 |
| 237981_at    | CMYA5               | -0.731 | -1.66 | 1.03E-04 | 3.47E-03 |
| 205709_s_at  | CDS1                | -0.733 | -1.66 | 8.52E-06 | 5.65E-04 |
| 201267_s_at  | PSMC3               | -0.734 | -1.66 | 2.64E-03 | 3.27E-02 |
| 223599_at    | TRIM6               | -0.734 | -1.66 | 7.10E-04 | 1.35E-02 |
| 213793_s_at  | HOMER1              | -0.736 | -1.67 | 1.65E-04 | 4.87E-03 |
| 1552496_a_at | COBL                | -0.737 | -1.67 | 4.66E-05 | 1.95E-03 |
| 241990_at    | RHOV                | -0.737 | -1.67 | 1.64E-06 | 1.69E-04 |
| 217185_s_at  | ZNF259 /// ZNF259P1 | -0.741 | -1.67 | 2.02E-07 | 3.85E-05 |
| 225496_s_at  | SYTL2               | -0.745 | -1.68 | 6.89E-05 | 2.59E-03 |
| 203742_s_at  | LOC732360 /// TDG   | -0.746 | -1.68 | 7.59E-08 | 1.83E-05 |
| 232067_at    | FAXC                | -0.747 | -1.68 | 3.07E-03 | 3.62E-02 |
| 1552626_a_at | TMEM163             | -0.752 | -1.68 | 2.07E-03 | 2.79E-02 |
| 210948_s_at  | LEF1                | -0.752 | -1.68 | 2.15E-06 | 2.05E-04 |
| 228900_at    | SPECC1              | -0.753 | -1.69 | 4.38E-06 | 3.46E-04 |
| 237466_s_at  | HHIP                | -0.76  | -1.69 | 2.10E-06 | 2.02E-04 |
| 220272_at    | BNC2                | -0.76  | -1.69 | 5.45E-04 | 1.13E-02 |
| 222874_s_at  | CLN8                | -0.76  | -1.69 | 3.41E-09 | 1.94E-06 |
| 235275_at    | BMP8B               | -0.76  | -1.69 | 1.23E-05 | 7.31E-04 |
| 211538_s_at  | HSPA2               | -0.761 | -1.69 | 2.89E-07 | 4.88E-05 |
| 211764_s_at  | UBE2D1              | -0.763 | -1.7  | 3.91E-08 | 1.16E-05 |
| 208399_s_at  | EDN3                | -0.765 | -1.7  | 1.71E-03 | 2.45E-02 |
| 214104_at    | GPR161              | -0.765 | -1.7  | 2.61E-07 | 4.53E-05 |
| 228605_at    | UBXN2A              | -0.768 | -1.7  | 5.09E-04 | 1.08E-02 |
| 200052_s_at  | ILF2                | -0.771 | -1.71 | 3.36E-05 | 1.53E-03 |
| 214939_x_at  | MLLT4               | -0.773 | -1.71 | 1.41E-10 | 2.35E-07 |
| 209273_s_at  | ISCA1               | -0.774 | -1.71 | 1.90E-08 | 7.01E-06 |
| 203423_at    | RBP1                | -0.778 | -1.71 | 2.60E-04 | 6.68E-03 |
| 215150_at    | YOD1                | -0.778 | -1.72 | 1.08E-05 | 6.68E-04 |
| 213836_s_at  | WIPI1               | -0.779 | -1.72 | 1.44E-07 | 2.99E-05 |
| 239136_at    | UNC5B-AS1           | -0.779 | -1.72 | 1.55E-03 | 2.29E-02 |
| 34478_at     | RAB11B              | -0.779 | -1.72 | 1.43E-03 | 2.16E-02 |

|                  |                     |        |       |          |          |
|------------------|---------------------|--------|-------|----------|----------|
| 213457_at        | MFHAS1              | -0.78  | -1.72 | 4.24E-04 | 9.59E-03 |
| 223879_s_at      | OXR1                | -0.781 | -1.72 | 2.67E-05 | 1.31E-03 |
| 205117_at        | FGF1                | -0.783 | -1.72 | 4.66E-03 | 4.76E-02 |
| 216641_s_at      | LAD1                | -0.784 | -1.72 | 5.47E-05 | 2.18E-03 |
| 205422_s_at      | ITGBL1              | -0.786 | -1.72 | 1.40E-05 | 8.08E-04 |
| 233971_at        | FAM166A             | -0.787 | -1.73 | 1.30E-04 | 4.10E-03 |
| 209848_s_at      | PMEL                | -0.796 | -1.74 | 1.56E-05 | 8.76E-04 |
| 228653_at        | SAMD5               | -0.798 | -1.74 | 1.36E-03 | 2.09E-02 |
| 232555_at        | CREB5               | -0.798 | -1.74 | 2.59E-04 | 6.66E-03 |
| 212822_at        | HEG1                | -0.799 | -1.74 | 6.64E-05 | 2.52E-03 |
| 223078_s_at      | TMOD3               | -0.8   | -1.74 | 8.74E-08 | 1.99E-05 |
| 208555_x_at      | CST2                | -0.801 | -1.74 | 3.82E-09 | 2.02E-06 |
| 212807_s_at      | SORT1               | -0.801 | -1.74 | 1.52E-07 | 3.10E-05 |
| 218384_at        | CARHSP1             | -0.806 | -1.75 | 3.32E-05 | 1.52E-03 |
| 219612_s_at      | FGG                 | -0.808 | -1.75 | 8.16E-04 | 1.48E-02 |
| 235095_at        | CCDC64B             | -0.808 | -1.75 | 8.16E-08 | 1.93E-05 |
| 231192_at        | LPAR3               | -0.809 | -1.75 | 2.00E-12 | 2.46E-08 |
| 207195_at        | CNTN6               | -0.81  | -1.75 | 1.82E-03 | 2.56E-02 |
| 213486_at        | COPG2IT1            | -0.81  | -1.75 | 4.88E-04 | 1.05E-02 |
| 219367_s_at      | NRP2                | -0.812 | -1.76 | 1.01E-04 | 3.42E-03 |
| 205931_s_at      | CREB5 /// LOC401317 | -0.812 | -1.76 | 2.66E-04 | 6.74E-03 |
| 1553915_at       | C10orf126           | -0.813 | -1.76 | 5.64E-06 | 4.19E-04 |
| 233586_s_at      | KLK12               | -0.813 | -1.76 | 1.89E-03 | 2.63E-02 |
| 206912_at        | FOXE1               | -0.814 | -1.76 | 1.76E-04 | 5.09E-03 |
| 206504_at        | CYP24A1             | -0.814 | -1.76 | 2.25E-04 | 6.03E-03 |
| 203222_s_at      | TLE1                | -0.814 | -1.76 | 3.26E-06 | 2.81E-04 |
| 217799_x_at      | UBE2H               | -0.814 | -1.76 | 2.26E-06 | 2.14E-04 |
| 226237_at        | COL8A1              | -0.815 | -1.76 | 3.89E-03 | 4.23E-02 |
| 209242_at        | PEG3                | -0.815 | -1.76 | 1.38E-04 | 4.32E-03 |
| 239082_at        | FZD3                | -0.815 | -1.76 | 2.80E-04 | 7.00E-03 |
| 239707_at        | SLC5A10             | -0.819 | -1.76 | 9.01E-11 | 1.67E-07 |
| 216092_s_at      | SLC7A8              | -0.821 | -1.77 | 9.77E-06 | 6.22E-04 |
| 227955_s_at      | EFNA5               | -0.821 | -1.77 | 6.48E-08 | 1.67E-05 |
| 219369_s_at      | OTUB2               | -0.822 | -1.77 | 1.12E-06 | 1.32E-04 |
| 1552685_a_a<br>t | GRHL1               | -0.823 | -1.77 | 3.87E-06 | 3.17E-04 |
| 239913_at        | SLC10A4             | -0.824 | -1.77 | 3.57E-06 | 2.99E-04 |
| 234316_x_at      | KLK12               | -0.826 | -1.77 | 1.58E-04 | 4.73E-03 |
| 1568617_a_a<br>t | CAMSAP3             | -0.828 | -1.78 | 5.31E-06 | 4.01E-04 |
| 1554334_a_a<br>t | DNAJA4              | -0.832 | -1.78 | 2.95E-09 | 1.77E-06 |
| 226698_at        | FCHSD1              | -0.834 | -1.78 | 7.13E-08 | 1.79E-05 |
| 201147_s_at      | TIMP3               | -0.835 | -1.78 | 6.19E-05 | 2.39E-03 |
| 213759_at        | ARL4C               | -0.837 | -1.79 | 1.88E-08 | 7.01E-06 |

|              |                           |        |       |          |          |
|--------------|---------------------------|--------|-------|----------|----------|
| 210387_at    | NCALD                     | -0.837 | -1.79 | 7.99E-06 | 5.40E-04 |
| 235723_at    | BNC2                      | -0.838 | -1.79 | 3.60E-04 | 8.51E-03 |
| 202883_s_at  | PPP2R1B                   | -0.84  | -1.79 | 1.54E-08 | 6.07E-06 |
| 209387_s_at  | TM4SF1                    | -0.843 | -1.79 | 7.15E-05 | 2.66E-03 |
| 205471_s_at  | DACH1                     | -0.846 | -1.8  | 3.45E-04 | 8.23E-03 |
| 210521_s_at  | FETUB                     | -0.846 | -1.8  | 5.42E-04 | 1.13E-02 |
| 219250_s_at  | FLRT3                     | -0.848 | -1.8  | 3.38E-08 | 1.07E-05 |
| 220245_at    | SLC45A2                   | -0.861 | -1.82 | 8.86E-07 | 1.10E-04 |
| 228910_at    | CD82                      | -0.862 | -1.82 | 8.18E-07 | 1.04E-04 |
| 1552511_a_at | CPA6                      | -0.862 | -1.82 | 1.77E-07 | 3.54E-05 |
| 215034_s_at  | TM4SF1                    | -0.865 | -1.82 | 6.16E-05 | 2.38E-03 |
| 220999_s_at  | CYFIP2                    | -0.865 | -1.82 | 1.45E-05 | 8.24E-04 |
| 201149_s_at  | TIMP3                     | -0.87  | -1.83 | 4.07E-04 | 9.31E-03 |
| 223650_s_at  | NRBF2                     | -0.871 | -1.83 | 1.85E-08 | 6.99E-06 |
| 1553710_at   | FAM218A                   | -0.871 | -1.83 | 2.04E-04 | 5.66E-03 |
| 241985_at    | JMY                       | -0.872 | -1.83 | 3.06E-07 | 5.14E-05 |
| 1555299_s_at | ERVW-1                    | -0.872 | -1.83 | 9.21E-07 | 1.13E-04 |
| 205637_s_at  | SH3GL3                    | -0.873 | -1.83 | 9.95E-06 | 6.29E-04 |
| 203413_at    | NELL2                     | -0.874 | -1.83 | 9.40E-04 | 1.63E-02 |
| 228922_at    | SHF                       | -0.877 | -1.84 | 5.54E-06 | 4.14E-04 |
| 227410_at    | FAM43A                    | -0.878 | -1.84 | 1.23E-09 | 9.83E-07 |
| 221558_s_at  | LEF1                      | -0.879 | -1.84 | 1.35E-06 | 1.49E-04 |
| 229856_s_at  | PITHD1                    | -0.88  | -1.84 | 4.67E-07 | 7.16E-05 |
| 241412_at    | BTC                       | -0.882 | -1.84 | 4.20E-05 | 1.80E-03 |
| 220129_at    | CCDC169-SOHLH2 /// SOHLH2 | -0.883 | -1.84 | 1.75E-04 | 5.07E-03 |
| 221102_s_at  | TRPM6                     | -0.884 | -1.85 | 6.50E-07 | 9.00E-05 |
| 203367_at    | DUSP14                    | -0.884 | -1.85 | 5.05E-10 | 6.18E-07 |
| 210372_s_at  | TPD52L1                   | -0.885 | -1.85 | 7.52E-06 | 5.14E-04 |
| 220038_at    | C8orf44-SGK3 /// SGK3     | -0.887 | -1.85 | 1.14E-03 | 1.85E-02 |
| 219842_at    | ARL15                     | -0.887 | -1.85 | 4.07E-06 | 3.30E-04 |
| 235479_at    | CPEB2                     | -0.894 | -1.86 | 7.55E-07 | 1.00E-04 |
| 220625_s_at  | ELF5                      | -0.895 | -1.86 | 3.18E-05 | 1.47E-03 |
| 226122_at    | PLEKHG1                   | -0.895 | -1.86 | 3.87E-11 | 1.02E-07 |
| 201043_s_at  | ANP32A                    | -0.899 | -1.86 | 1.20E-05 | 7.17E-04 |
| 202016_at    | MEST                      | -0.9   | -1.87 | 4.61E-04 | 1.01E-02 |
| 232149_s_at  | NSMAF                     | -0.9   | -1.87 | 5.13E-07 | 7.67E-05 |
| 242329_at    | CREB5 /// LOC401317       | -0.903 | -1.87 | 5.56E-05 | 2.21E-03 |
| 216504_s_at  | SLC39A8                   | -0.904 | -1.87 | 9.54E-04 | 1.65E-02 |
| 204378_at    | BCAS1                     | -0.904 | -1.87 | 3.14E-06 | 2.75E-04 |
| 230135_at    | HHIP                      | -0.904 | -1.87 | 1.37E-04 | 4.30E-03 |
| 225295_at    | SLC39A10                  | -0.906 | -1.87 | 3.59E-08 | 1.09E-05 |
| 232378_at    | SLC5A9                    | -0.918 | -1.89 | 1.06E-03 | 1.77E-02 |

|              |                   |        |       |          |          |
|--------------|-------------------|--------|-------|----------|----------|
| 219301_s_at  | CNTNAP2           | -0.924 | -1.9  | 2.04E-04 | 5.65E-03 |
| 205535_s_at  | PCDH7             | -0.925 | -1.9  | 2.53E-06 | 2.35E-04 |
| 205125_at    | PLCD1             | -0.929 | -1.9  | 1.12E-09 | 9.37E-07 |
| 219683_at    | FZD3              | -0.929 | -1.9  | 6.67E-05 | 2.53E-03 |
| 206004_at    | TGM3              | -0.93  | -1.9  | 1.87E-06 | 1.85E-04 |
| 220800_s_at  | TMOD3             | -0.932 | -1.91 | 2.35E-08 | 8.21E-06 |
| 202752_x_at  | SLC7A8            | -0.932 | -1.91 | 5.24E-06 | 3.98E-04 |
| 205534_at    | PCDH7             | -0.933 | -1.91 | 4.72E-05 | 1.96E-03 |
| 1556421_at   | LOC286189         | -0.936 | -1.91 | 1.86E-04 | 5.30E-03 |
| 1553539_at   | KRT74             | -0.938 | -1.92 | 3.66E-05 | 1.63E-03 |
| 237732_at    | PRR9              | -0.938 | -1.92 | 4.22E-03 | 4.46E-02 |
| 200744_s_at  | GNB1              | -0.942 | -1.92 | 6.11E-10 | 6.27E-07 |
| 230722_at    | BNC2              | -0.944 | -1.92 | 1.00E-04 | 3.41E-03 |
| 210335_at    | RASSF9            | -0.947 | -1.93 | 1.10E-05 | 6.76E-04 |
| 1555462_at   | PPP1R1C           | -0.947 | -1.93 | 2.18E-04 | 5.92E-03 |
| 217924_at    | C6orf106          | -0.949 | -1.93 | 1.36E-06 | 1.51E-04 |
| 224277_at    | MOP-1             | -0.95  | -1.93 | 6.08E-09 | 2.92E-06 |
| 231461_at    | KRT71             | -0.955 | -1.94 | 4.97E-03 | 4.96E-02 |
| 1557122_s_at | GABRB2            | -0.959 | -1.94 | 1.68E-04 | 4.95E-03 |
| 205592_at    | SLC4A1            | -0.96  | -1.95 | 2.46E-08 | 8.42E-06 |
| 213909_at    | LRRC15            | -0.961 | -1.95 | 2.04E-04 | 5.65E-03 |
| 1553493_a_at | TDH               | -0.966 | -1.95 | 1.17E-06 | 1.35E-04 |
| 206774_at    | FRMPD1            | -0.971 | -1.96 | 2.84E-07 | 4.81E-05 |
| 242344_at    | GABRB2            | -0.976 | -1.97 | 1.74E-04 | 5.07E-03 |
| 205348_s_at  | DYNC111           | -0.976 | -1.97 | 4.25E-04 | 9.59E-03 |
| 206498_at    | OCA2              | -0.978 | -1.97 | 9.33E-06 | 6.02E-04 |
| 204790_at    | SMAD7             | -0.979 | -1.97 | 3.57E-08 | 1.09E-05 |
| 205941_s_at  | COL10A1           | -0.98  | -1.97 | 2.33E-07 | 4.28E-05 |
| 1569433_at   | SAMD5             | -0.983 | -1.98 | 9.28E-05 | 3.23E-03 |
| 214433_s_at  | SELENBP1          | -0.983 | -1.98 | 1.40E-05 | 8.10E-04 |
| 236255_at    | PLEKHG4B          | -0.984 | -1.98 | 1.39E-05 | 8.07E-04 |
| 222015_at    | CSNK1E            | -0.985 | -1.98 | 5.73E-09 | 2.78E-06 |
| 228068_at    | GOLGA7B           | -0.987 | -1.98 | 4.94E-09 | 2.50E-06 |
| 1554333_at   | DNAJA4            | -0.988 | -1.98 | 8.62E-08 | 1.99E-05 |
| 224520_s_at  | BEST3             | -0.989 | -1.98 | 9.40E-05 | 3.26E-03 |
| 216258_s_at  | SERPINB13         | -1.01  | -2.01 | 2.16E-07 | 4.03E-05 |
| 233340_at    | SPINK13           | -1.01  | -2.02 | 4.77E-05 | 1.97E-03 |
| 205334_at    | S100A1            | -1.02  | -2.02 | 3.41E-05 | 1.54E-03 |
| 209372_x_at  | TUBB2A /// TUBB2B | -1.02  | -2.03 | 7.06E-07 | 9.53E-05 |
| 221389_at    | PLA2G2E           | -1.03  | -2.04 | 1.69E-11 | 6.44E-08 |
| 203827_at    | WIP1              | -1.04  | -2.05 | 6.44E-10 | 6.43E-07 |
| 208708_x_at  | EIF5              | -1.04  | -2.06 | 6.67E-11 | 1.45E-07 |

|                  |                                                                                   |       |       |          |          |
|------------------|-----------------------------------------------------------------------------------|-------|-------|----------|----------|
| 227950_at        | UBE2H                                                                             | -1.04 | -2.06 | 2.56E-08 | 8.59E-06 |
| 206777_s_at      | CRYBB2 /// CRYBB2P1                                                               | -1.04 | -2.06 | 3.19E-03 | 3.71E-02 |
| 212479_s_at      | RMND5A                                                                            | -1.05 | -2.07 | 2.03E-09 | 1.36E-06 |
| 243478_at        | CHST2                                                                             | -1.05 | -2.07 | 3.05E-05 | 1.43E-03 |
| 239028_at        | LYPD6                                                                             | -1.05 | -2.08 | 4.80E-08 | 1.36E-05 |
| 219768_at        | VTCN1                                                                             | -1.05 | -2.08 | 1.74E-03 | 2.48E-02 |
| 217395_at        | MT4                                                                               | -1.06 | -2.08 | 2.60E-07 | 4.53E-05 |
| 203650_at        | PROCR                                                                             | -1.06 | -2.08 | 3.32E-10 | 4.54E-07 |
| 228996_at        | RC3H1                                                                             | -1.06 | -2.09 | 5.63E-08 | 1.53E-05 |
| 236263_at        | SHH                                                                               | -1.06 | -2.09 | 1.23E-04 | 3.95E-03 |
| 217933_s_at      | LAP3                                                                              | -1.07 | -2.1  | 1.30E-09 | 9.98E-07 |
| 209617_s_at      | CTNND2                                                                            | -1.08 | -2.11 | 1.38E-04 | 4.32E-03 |
| 218458_at        | GMCL1                                                                             | -1.08 | -2.12 | 6.44E-09 | 3.05E-06 |
| 240389_at        | TRPM6                                                                             | -1.08 | -2.12 | 2.64E-04 | 6.73E-03 |
| 214590_s_at      | UBE2D1                                                                            | -1.09 | -2.13 | 4.72E-10 | 6.01E-07 |
| 230493_at        | SHISA2                                                                            | -1.09 | -2.14 | 2.30E-03 | 2.99E-02 |
| 215779_s_at      | HIST1H2BC /// HIST1H2BE ///<br>HIST1H2BF /// HIST1H2BG ///<br>HIST1H2BI /// NCALD | -1.1  | -2.14 | 4.26E-06 | 3.39E-04 |
| 231743_at        | WNT3                                                                              | -1.1  | -2.14 | 2.92E-11 | 9.00E-08 |
| 225809_at        | PARM1                                                                             | -1.1  | -2.14 | 1.32E-05 | 7.76E-04 |
| 230740_at        | EHD3                                                                              | -1.1  | -2.14 | 5.32E-05 | 2.14E-03 |
| 213385_at        | CHN2                                                                              | -1.1  | -2.14 | 2.34E-07 | 4.28E-05 |
| 230138_at        | NCS1                                                                              | -1.12 | -2.17 | 3.89E-08 | 1.16E-05 |
| 238478_at        | BNC2                                                                              | -1.12 | -2.17 | 2.97E-05 | 1.41E-03 |
| 219554_at        | RHCG                                                                              | -1.12 | -2.18 | 1.69E-06 | 1.72E-04 |
| 214226_at        | PRSS53                                                                            | -1.13 | -2.19 | 2.43E-09 | 1.55E-06 |
| 223427_s_at      | EPB41L4B                                                                          | -1.14 | -2.21 | 1.64E-07 | 3.33E-05 |
| 210689_at        | CLDN14                                                                            | -1.14 | -2.21 | 1.48E-06 | 1.59E-04 |
| 229030_at        | CAPN8                                                                             | -1.15 | -2.22 | 9.78E-04 | 1.67E-02 |
| 1554097_a_a<br>t | MIR31HG                                                                           | -1.15 | -2.23 | 5.46E-10 | 6.26E-07 |
| 214636_at        | CALCB                                                                             | -1.15 | -2.23 | 1.00E-07 | 2.23E-05 |
| 221425_s_at      | ISCA1                                                                             | -1.16 | -2.23 | 8.01E-11 | 1.64E-07 |
| 239203_at        | LSMEM1                                                                            | -1.16 | -2.24 | 1.01E-05 | 6.34E-04 |
| 222871_at        | KLHDC8A                                                                           | -1.16 | -2.24 | 5.72E-07 | 8.35E-05 |
| 233814_at        | EFNA5                                                                             | -1.17 | -2.25 | 3.30E-07 | 5.43E-05 |
| 215785_s_at      | CYFIP2                                                                            | -1.17 | -2.25 | 1.07E-07 | 2.35E-05 |
| 224412_s_at      | TRPM6                                                                             | -1.17 | -2.25 | 1.58E-04 | 4.74E-03 |
| 235683_at        | SESN3                                                                             | -1.18 | -2.26 | 3.61E-07 | 5.75E-05 |
| 218980_at        | FHOD3                                                                             | -1.18 | -2.26 | 1.69E-05 | 9.27E-04 |
| 230469_at        | RTKN2                                                                             | -1.18 | -2.26 | 3.14E-05 | 1.46E-03 |
| 208216_at        | DLX4                                                                              | -1.18 | -2.27 | 2.53E-06 | 2.35E-04 |
| 202376_at        | SERPINA3                                                                          | -1.18 | -2.27 | 4.49E-05 | 1.90E-03 |

|              |                   |       |       |          |          |
|--------------|-------------------|-------|-------|----------|----------|
| 212478_at    | RMND5A            | -1.19 | -2.28 | 9.87E-12 | 5.21E-08 |
| 209800_at    | KRT16             | -1.19 | -2.28 | 6.87E-06 | 4.78E-04 |
| 1552807_a_at | SIGLEC10          | -1.2  | -2.29 | 1.43E-07 | 2.98E-05 |
| 1556533_at   | LINC00868         | -1.2  | -2.3  | 6.02E-11 | 1.43E-07 |
| 234488_s_at  | GMCL1 /// GMCL1P1 | -1.21 | -2.31 | 9.13E-09 | 3.94E-06 |
| 235591_at    | SSTR1             | -1.22 | -2.32 | 7.02E-06 | 4.85E-04 |
| 203921_at    | CHST2             | -1.22 | -2.33 | 2.36E-05 | 1.20E-03 |
| 229163_at    | CAMK2N1           | -1.22 | -2.33 | 1.12E-04 | 3.69E-03 |
| 221416_at    | PLA2G2F           | -1.22 | -2.33 | 5.65E-10 | 6.26E-07 |
| 206376_at    | SLC6A15           | -1.23 | -2.35 | 1.46E-10 | 2.35E-07 |
| 206882_at    | SLC1A6            | -1.23 | -2.35 | 3.54E-07 | 5.67E-05 |
| 200790_at    | ODC1              | -1.24 | -2.37 | 6.19E-11 | 1.43E-07 |
| 217031_at    | KRT84             | -1.26 | -2.4  | 2.39E-05 | 1.21E-03 |
| 242138_at    | DLX1              | -1.26 | -2.4  | 2.85E-05 | 1.37E-03 |
| 226887_at    | HSPA14            | -1.26 | -2.4  | 9.54E-12 | 5.21E-08 |
| 209343_at    | EFHD1             | -1.27 | -2.42 | 3.91E-04 | 9.06E-03 |
| 217678_at    | SLC7A11           | -1.27 | -2.42 | 6.34E-06 | 4.55E-04 |
| 227763_at    | LYPD6             | -1.27 | -2.42 | 9.37E-05 | 3.26E-03 |
| 220984_s_at  | SLCO5A1           | -1.29 | -2.44 | 3.38E-07 | 5.53E-05 |
| 242062_at    | SAMD8             | -1.29 | -2.45 | 2.79E-08 | 9.30E-06 |
| 230276_at    | FAM49A            | -1.29 | -2.45 | 1.76E-07 | 3.54E-05 |
| 233123_at    | SLC40A1           | -1.3  | -2.45 | 9.14E-07 | 1.13E-04 |
| 207092_at    | LEP               | -1.3  | -2.46 | 3.85E-03 | 4.20E-02 |
| 206604_at    | OVOL1             | -1.3  | -2.47 | 9.98E-10 | 9.00E-07 |
| 231778_at    | DLX3              | -1.31 | -2.47 | 1.95E-11 | 6.53E-08 |
| 243445_at    | BNC2              | -1.31 | -2.48 | 1.13E-06 | 1.33E-04 |
| 1553574_at   | IFNE              | -1.31 | -2.48 | 4.27E-08 | 1.24E-05 |
| 219932_at    | SLC27A6           | -1.32 | -2.49 | 7.20E-06 | 4.94E-04 |
| 1569852_at   | LSMEM1            | -1.34 | -2.53 | 4.68E-09 | 2.42E-06 |
| 205290_s_at  | BMP2              | -1.34 | -2.53 | 7.33E-09 | 3.39E-06 |
| 219463_at    | LAMP5             | -1.35 | -2.54 | 2.43E-08 | 8.38E-06 |
| 205724_at    | PKP1              | -1.35 | -2.55 | 6.78E-10 | 6.59E-07 |
| 221962_s_at  | UBE2H             | -1.36 | -2.56 | 1.10E-07 | 2.37E-05 |
| 1555774_at   | ZAR1              | -1.36 | -2.57 | 1.07E-09 | 9.25E-07 |
| 238568_s_at  | NPC1              | -1.36 | -2.57 | 3.52E-09 | 1.94E-06 |
| 1553388_at   | FAM26D            | -1.37 | -2.58 | 1.35E-07 | 2.83E-05 |
| 231583_at    | KRT74             | -1.37 | -2.58 | 2.91E-03 | 3.48E-02 |
| 240388_at    | KRT27             | -1.38 | -2.6  | 8.90E-04 | 1.57E-02 |
| 1558687_a_at | FOXN1             | -1.38 | -2.6  | 3.36E-12 | 3.00E-08 |
| 227506_at    | SLC16A9           | -1.39 | -2.62 | 1.76E-08 | 6.76E-06 |
| 228646_at    | PPP1R1C           | -1.39 | -2.62 | 1.12E-06 | 1.32E-04 |
| 227650_at    | HSPA14            | -1.39 | -2.62 | 5.54E-08 | 1.53E-05 |

|              |                                           |       |       |          |          |
|--------------|-------------------------------------------|-------|-------|----------|----------|
| 1553829_at   | CYP1B1-AS1                                | -1.4  | -2.63 | 1.13E-05 | 6.86E-04 |
| 210082_at    | ABCA4                                     | -1.4  | -2.64 | 8.67E-08 | 1.99E-05 |
| 208290_s_at  | EIF5                                      | -1.41 | -2.66 | 3.80E-11 | 1.02E-07 |
| 1554592_a_at | SLC1A6                                    | -1.41 | -2.66 | 5.34E-08 | 1.48E-05 |
| 203130_s_at  | KIF5C                                     | -1.43 | -2.69 | 1.20E-05 | 7.17E-04 |
| 205289_at    | BMP2                                      | -1.44 | -2.71 | 5.98E-07 | 8.63E-05 |
| 241014_at    | FLG-AS1                                   | -1.44 | -2.71 | 7.30E-08 | 1.80E-05 |
| 1553861_at   | TCP11L2                                   | -1.45 | -2.73 | 5.93E-10 | 6.26E-07 |
| 204687_at    | PARM1                                     | -1.45 | -2.74 | 2.39E-07 | 4.36E-05 |
| 223739_at    | PADI1                                     | -1.46 | -2.75 | 3.15E-07 | 5.26E-05 |
| 207065_at    | KRT75                                     | -1.46 | -2.75 | 1.37E-05 | 7.99E-04 |
| 214576_at    | KRT36                                     | -1.47 | -2.77 | 6.53E-09 | 3.05E-06 |
| 202884_s_at  | PPP2R1B                                   | -1.47 | -2.77 | 3.52E-08 | 1.08E-05 |
| 209757_s_at  | MYCN                                      | -1.48 | -2.78 | 5.20E-06 | 3.95E-04 |
| 209859_at    | TRIM9                                     | -1.48 | -2.78 | 1.12E-05 | 6.83E-04 |
| 202886_s_at  | PPP2R1B                                   | -1.48 | -2.79 | 1.38E-08 | 5.50E-06 |
| 1553494_at   | TDH                                       | -1.48 | -2.8  | 2.11E-06 | 2.03E-04 |
| 208250_s_at  | DMBT1                                     | -1.48 | -2.8  | 1.11E-05 | 6.82E-04 |
| 228975_at    | SP6                                       | -1.49 | -2.81 | 1.14E-12 | 2.10E-08 |
| 211357_s_at  | ALDOB                                     | -1.49 | -2.81 | 5.89E-04 | 1.19E-02 |
| 223720_at    | SPINK7                                    | -1.49 | -2.82 | 4.33E-05 | 1.85E-03 |
| 237003_at    | BEST3                                     | -1.5  | -2.82 | 3.24E-07 | 5.35E-05 |
| 1554593_s_at | SLC1A6                                    | -1.5  | -2.83 | 1.41E-06 | 1.54E-04 |
| 1557321_a_at | CAPN14                                    | -1.5  | -2.84 | 1.19E-06 | 1.36E-04 |
| 213107_at    | TNIK                                      | -1.51 | -2.84 | 5.14E-08 | 1.44E-05 |
| 221627_at    | TRIM10                                    | -1.51 | -2.84 | 6.82E-07 | 9.30E-05 |
| 205374_at    | SLN                                       | -1.51 | -2.85 | 2.13E-06 | 2.03E-04 |
| 213774_s_at  | PPP1R2                                    | -1.51 | -2.85 | 2.39E-10 | 3.39E-07 |
| 220624_s_at  | ELF5                                      | -1.52 | -2.86 | 1.28E-10 | 2.26E-07 |
| 229158_at    | WNK4                                      | -1.52 | -2.86 | 2.10E-04 | 5.78E-03 |
| 217428_s_at  | COL10A1                                   | -1.54 | -2.9  | 7.19E-08 | 1.79E-05 |
| 238625_at    | C1orf168                                  | -1.55 | -2.92 | 7.95E-08 | 1.91E-05 |
| 232682_at    | MREG                                      | -1.56 | -2.94 | 1.25E-09 | 9.83E-07 |
| 209683_at    | FAM49A                                    | -1.57 | -2.96 | 9.36E-09 | 3.97E-06 |
| 229823_at    | RIMS2                                     | -1.57 | -2.96 | 6.81E-06 | 4.75E-04 |
| 233631_x_at  | KRTAP9-2 /// KRTAP9-8 ///<br>LOC100996762 | -1.57 | -2.97 | 6.82E-04 | 1.32E-02 |
| 218935_at    | EHD3                                      | -1.6  | -3.03 | 2.50E-07 | 4.46E-05 |
| 239572_at    | GJA3                                      | -1.62 | -3.08 | 5.57E-08 | 1.53E-05 |
| 202833_s_at  | SERPINA1                                  | -1.62 | -3.08 | 2.37E-04 | 6.26E-03 |
| 234685_x_at  | KRTAP4-9                                  | -1.65 | -3.14 | 3.27E-04 | 7.94E-03 |
| 210311_at    | FGF5                                      | -1.66 | -3.17 | 6.29E-08 | 1.66E-05 |
| 211485_s_at  | FGF18                                     | -1.67 | -3.19 | 3.43E-08 | 1.07E-05 |



|                  |                        |       |       |          |          |
|------------------|------------------------|-------|-------|----------|----------|
| 233301_at        | OXCT2                  | -1.68 | -3.2  | 3.58E-10 | 4.73E-07 |
| 211429_s_at      | SERPINA1               | -1.7  | -3.26 | 1.62E-05 | 9.01E-04 |
| 207716_at        | KRT38                  | -1.71 | -3.27 | 8.38E-04 | 1.51E-02 |
| 219659_at        | ATP8A2                 | -1.75 | -3.37 | 3.08E-06 | 2.71E-04 |
| 227764_at        | LYPD6                  | -1.78 | -3.42 | 3.04E-06 | 2.69E-04 |
| 210319_x_at      | MSX2                   | -1.79 | -3.46 | 8.56E-08 | 1.99E-05 |
| 218266_s_at      | NCS1                   | -1.8  | -3.49 | 5.18E-10 | 6.18E-07 |
| 205555_s_at      | MSX2                   | -1.84 | -3.57 | 4.72E-09 | 2.42E-06 |
| 219832_s_at      | HOXC13                 | -1.84 | -3.59 | 2.06E-10 | 3.04E-07 |
| 209981_at        | CSDC2                  | -1.87 | -3.66 | 1.84E-09 | 1.26E-06 |
| 233681_at        | KRTAP3-3               | -1.87 | -3.67 | 1.05E-04 | 3.50E-03 |
| 209921_at        | SLC7A11                | -1.89 | -3.7  | 5.15E-08 | 1.44E-05 |
| 1564921_at       | KRTAP13-1              | -1.92 | -3.79 | 2.62E-03 | 3.26E-02 |
| 1564435_a_a<br>t | KRT72                  | -1.92 | -3.79 | 6.18E-06 | 4.46E-04 |
| 237507_at        | KRT73                  | -1.95 | -3.87 | 1.67E-05 | 9.23E-04 |
| 206987_x_at      | FGF18                  | -1.98 | -3.94 | 3.21E-07 | 5.32E-05 |
| 202166_s_at      | PPP1R2                 | -1.98 | -3.95 | 1.93E-13 | 7.14E-09 |
| 215189_at        | KRT86 /// LOC100509764 | -1.99 | -3.97 | 3.15E-06 | 2.75E-04 |
| 228705_at        | CAPN12                 | -1.99 | -3.98 | 3.60E-09 | 1.96E-06 |
| 216810_at        | KRTAP4-7               | -2    | -4    | 7.67E-05 | 2.81E-03 |
| 211029_x_at      | FGF18                  | -2.01 | -4.02 | 2.05E-07 | 3.87E-05 |
| 229730_at        | SMTNL2                 | -2.01 | -4.02 | 5.15E-06 | 3.93E-04 |
| 233534_at        | KRTAP3-2               | -2.02 | -4.04 | 2.55E-04 | 6.60E-03 |
| 206423_at        | ANGPTL7                | -2.03 | -4.07 | 3.69E-04 | 8.64E-03 |
| 222351_at        | PPP2R1B                | -2.04 | -4.1  | 6.73E-08 | 1.70E-05 |
| 220090_at        | CRNN                   | -2.04 | -4.1  | 1.19E-06 | 1.36E-04 |
| 207147_at        | DLX2                   | -2.07 | -4.19 | 1.91E-06 | 1.87E-04 |
| 224262_at        | IL1F10                 | -2.07 | -4.21 | 5.88E-08 | 1.56E-05 |
| 1562628_at       | KRT40                  | -2.1  | -4.28 | 7.78E-07 | 1.02E-04 |
| 1556410_a_a<br>t | KRTAP19-1              | -2.11 | -4.33 | 7.86E-05 | 2.86E-03 |
| 234772_s_at      | KRTAP2-1 /// KRTAP2-2  | -2.12 | -4.35 | 1.50E-04 | 4.56E-03 |
| 1553537_at       | KRT73                  | -2.13 | -4.37 | 1.26E-08 | 5.06E-06 |
| 233533_at        | KRTAP1-5               | -2.17 | -4.5  | 2.60E-04 | 6.68E-03 |
| 220978_at        | KRTAP1-3               | -2.17 | -4.5  | 1.08E-04 | 3.56E-03 |
| 240967_at        | KRTAP19-3              | -2.17 | -4.5  | 4.25E-04 | 9.60E-03 |
| 203304_at        | BAMBI                  | -2.2  | -4.6  | 1.85E-07 | 3.64E-05 |
| 234635_at        | KRTAP4-1               | -2.21 | -4.62 | 1.61E-04 | 4.80E-03 |
| 220635_at        | PSORS1C2               | -2.21 | -4.62 | 1.15E-09 | 9.44E-07 |
| 214284_s_at      | FGF18                  | -2.21 | -4.63 | 1.15E-06 | 1.34E-04 |
| 220970_s_at      | KRTAP2-3 /// KRTAP2-4  | -2.22 | -4.65 | 9.89E-05 | 3.39E-03 |
| 205713_s_at      | COMP                   | -2.23 | -4.68 | 4.88E-06 | 3.79E-04 |
| 204720_s_at      | DNAJC6                 | -2.23 | -4.69 | 2.63E-09 | 1.63E-06 |

|                  |                                            |       |       |          |          |
|------------------|--------------------------------------------|-------|-------|----------|----------|
| 234639_x_at      | KRTAP9-8                                   | -2.23 | -4.71 | 4.76E-05 | 1.97E-03 |
| 233640_x_at      | KRTAP9-4                                   | -2.25 | -4.74 | 5.06E-05 | 2.06E-03 |
| 234683_at        | KRTAP4-11 /// KRTAP4-6 ///<br>LOC100134267 | -2.25 | -4.75 | 2.56E-04 | 6.62E-03 |
| 231382_at        | FGF18                                      | -2.27 | -4.84 | 3.61E-06 | 3.00E-04 |
| 242301_at        | CBLN2                                      | -2.28 | -4.84 | 4.29E-04 | 9.64E-03 |
| 206969_at        | KRT34 /// LOC100653049                     | -2.33 | -5.04 | 2.57E-05 | 1.28E-03 |
| 220976_s_at      | KRTAP1-1                                   | -2.39 | -5.23 | 7.41E-05 | 2.73E-03 |
| 233537_at        | KRTAP3-1                                   | -2.43 | -5.37 | 1.60E-04 | 4.76E-03 |
| 1555775_a_a<br>t | ZAR1                                       | -2.44 | -5.42 | 1.77E-09 | 1.26E-06 |
| 224269_at        | KRTAP4-12                                  | -2.44 | -5.42 | 7.21E-05 | 2.67E-03 |
| 206027_at        | S100A3                                     | -2.46 | -5.51 | 2.49E-08 | 8.44E-06 |
| 232887_at        | PIRT                                       | -2.5  | -5.65 | 3.42E-09 | 1.94E-06 |
| 220256_s_at      | OXCT2                                      | -2.51 | -5.68 | 4.06E-12 | 3.00E-08 |
| 220779_at        | PADI3                                      | -2.54 | -5.82 | 3.34E-06 | 2.84E-04 |
| 1554398_at       | LYG2                                       | -2.56 | -5.9  | 9.01E-09 | 3.94E-06 |
| 234678_at        | KRTAP4-3                                   | -2.57 | -5.94 | 8.75E-06 | 5.75E-04 |
| 234680_at        | KRTAP17-1                                  | -2.58 | -5.99 | 8.48E-06 | 5.65E-04 |
| 208092_s_at      | FAM49A                                     | -2.6  | -6.05 | 2.08E-09 | 1.36E-06 |
| 234633_at        | KRTAP4-11                                  | -2.63 | -6.18 | 1.85E-06 | 1.83E-04 |
| 234679_at        | KRTAP9-3                                   | -2.63 | -6.21 | 1.43E-05 | 8.18E-04 |
| 206677_at        | KRT31                                      | -2.68 | -6.4  | 8.16E-07 | 1.04E-04 |
| 206994_at        | CST4                                       | -2.69 | -6.45 | 8.07E-10 | 7.55E-07 |
| 234691_at        | KRTAP2-1                                   | -2.75 | -6.72 | 4.19E-06 | 3.35E-04 |
| 216921_s_at      | KRT35                                      | -2.76 | -6.76 | 1.67E-05 | 9.23E-04 |
| 1562629_a_a<br>t | KRT40                                      | -2.77 | -6.82 | 3.21E-06 | 2.79E-04 |
| 230720_at        | RNF182                                     | -2.79 | -6.94 | 8.92E-09 | 3.94E-06 |
| 234637_at        | KRTAP4-5                                   | -2.8  | -6.96 | 2.50E-05 | 1.26E-03 |
| 207670_at        | KRT85                                      | -2.8  | -6.98 | 3.44E-06 | 2.92E-04 |
| 214517_at        | KRTAP5-9                                   | -2.85 | -7.19 | 8.63E-09 | 3.94E-06 |
| 207146_at        | KRT32                                      | -2.85 | -7.23 | 5.61E-07 | 8.23E-05 |
| 220972_s_at      | KRTAP9-9                                   | -2.88 | -7.37 | 2.06E-05 | 1.08E-03 |
| 234684_s_at      | KRTAP4-4                                   | -2.9  | -7.45 | 8.04E-06 | 5.42E-04 |
| 234671_at        | KRTAP4-2                                   | -2.94 | -7.67 | 3.24E-06 | 2.80E-04 |
| 1555673_at       | KRTAP2-3 /// KRTAP2-4                      | -2.96 | -7.81 | 1.13E-05 | 6.86E-04 |
| 234631_at        | KRTAP4-8                                   | -3.01 | -8.03 | 6.69E-07 | 9.19E-05 |
| 1564803_at       | KRTAP11-1                                  | -3.04 | -8.23 | 4.22E-06 | 3.37E-04 |
| 207787_at        | KRT33B                                     | -3.14 | -8.83 | 5.08E-06 | 3.88E-04 |
| 1560897_a_a<br>t | KRTAP10-11                                 | -3.2  | -9.19 | 1.60E-06 | 1.68E-04 |
| 237853_x_at      | KRTAP10-12                                 | -3.26 | -9.55 | 1.35E-09 | 1.01E-06 |
| 233158_at        | KRT82                                      | -3.28 | -9.71 | 2.51E-07 | 4.46E-05 |
| 208532_x_at      | KRTAP5-8                                   | -3.49 | -11.3 | 1.61E-08 | 6.25E-06 |
| 1564960_at       | KRTAP7-1                                   | -3.63 | -12.4 | 6.37E-06 | 4.56E-04 |

|             |          |       |       |          |          |
|-------------|----------|-------|-------|----------|----------|
| 213711_at   | KRT81    | -3.64 | -12.5 | 1.05E-07 | 2.32E-05 |
| 1564974_at  | KRTAP8-1 | -3.71 | -13.1 | 2.15E-05 | 1.11E-03 |
| 219270_at   | CHAC1    | -3.83 | -14.2 | 1.92E-10 | 2.95E-07 |
| 206224_at   | CST1     | -3.92 | -15.1 | 1.74E-11 | 6.44E-08 |
| 208483_x_at | KRT33A   | -3.92 | -15.2 | 8.15E-08 | 1.93E-05 |
| 234880_x_at | KRTAP1-3 | -3.95 | -15.4 | 3.27E-08 | 1.05E-05 |
| 207669_at   | KRT83    | -4.13 | -17.5 | 3.32E-08 | 1.06E-05 |
| 207457_s_at | LY6G6D   | -4.2  | -18.4 | 2.64E-09 | 1.63E-06 |
| 1561330_at  | DSG4     | -4.21 | -18.6 | 1.93E-07 | 3.76E-05 |
| 221297_at   | GPRC5D   | -4.27 | -19.3 | 9.17E-09 | 3.94E-06 |

**Supplemental Table 6. KEGG pathways upregulated in AAP.**

| <b>Terms</b>                                    | <b>Genes</b>                                                                                                                                                                                                    | <b>Count</b> | <b>Fold Enrichment</b> | <b>PValue</b> |
|-------------------------------------------------|-----------------------------------------------------------------------------------------------------------------------------------------------------------------------------------------------------------------|--------------|------------------------|---------------|
| hsa05332:Graft-versus-host disease              | HLA-DQB1, PRF1, HLA-DRB1, LOC100133583, GZMB, HLA-DMB, HLA-DMA, HLA-DQA1, HLA-F, LOC100133678, CD86, HLA-DRB4, IL1B, HLA-DPA1, HLA-DOA, KLRC1, CD28, HLA-DRA                                                    | 15           | 13.48                  | 7.52E-13      |
| hsa04940:Type I diabetes mellitus               | HLA-DQB1, PRF1, HLA-DRB1, LOC100133583, GZMB, HLA-DMB, HLA-DMA, HLA-DQA1, HLA-F, LOC100133678, CD86, HLA-DRB4, IL1B, HLA-DPA1, IL12B, HLA-DOA, CD28, HLA-DRA                                                    | 15           | 12.44                  | 2.76E-12      |
| hsa05330:Allograft rejection                    | HLA-DQB1, PRF1, HLA-DRB1, LOC100133583, GZMB, HLA-DMB, HLA-DMA, HLA-DQA1, HLA-F, LOC100133678, CD86, HLA-DRB4, HLA-DPA1, IL12B, HLA-DOA, CD28, HLA-DRA                                                          | 14           | 13.72                  | 4.26E-12      |
| hsa04514:Cell adhesion molecules (CAMs)         | HLA-DQB1, ITGAL, PTPRC, HLA-DRB1, CD8A, CD8B, NRXN3, LOC100133583, HLA-DMB, HLA-DMA, ITGAM, HLA-DQA1, HLA-F, LOC100133678, SIGLEC1, CD86, ICOS, HLA-DRB4, CD2, CD4, HLA-DPA1, HLA-DOA, SELPLG, CD28, HLA-DRA    | 22           | 5.56                   | 1.53E-10      |
| hsa04060:Cytokine-cytokine receptor interaction | IL1R2, CCR1, CXCL9, CCL8, CCL5, IL7R, CXCL11, CXCL10, CCL26, FLT3LG, LIF, CCL22, IL12RB1, IL10RA, IL1B, CSF2RB, CSF1R, IL2RB, IL18RAP, IL7, CCL18, CCL17, IFNAR2, CCL13, CCR7, CCR5, CCR2, IL12B, XCL1, IL22RA2 | 30           | 3.80                   | 3.67E-10      |
| hsa04640:Hematopoietic cell lineage             | IL1R2, CD3D, CD8A, HLA-DRB1, CD8B, CD3E, IL7, CD1C, CD1B, IL7R, ITGAM, FLT3LG, CD2, HLA-DRB4, IL1B, CD4, CSF1R, HLA-DRA                                                                                         | 17           | 6.55                   | 2.92E-09      |

|                                              |                                                                                                                                                                           |    |       |          |
|----------------------------------------------|---------------------------------------------------------------------------------------------------------------------------------------------------------------------------|----|-------|----------|
| hsa04612:Antigen processing and presentation | HLA-DQB1, CIITA, CD8A, HLA-DRB1, CD8B, LOC100133583, HLA-DMB, HLA-DMA, HLA-DQA1, B2M, HLA-F, LOC100133678, HSPA6, HLA-DRB4, HSPA7, CD4, HLA-DPA1, HLA-DOA, KLRC1, HLA-DRA | 16 | 6.63  | 8.19E-09 |
| hsa05320:Autoimmune thyroid disease          | HLA-DQB1, PRF1, HLA-DRB1, GZMB, LOC100133583, HLA-DMB, HLA-DMA, HLA-DQA1, HLA-F, LOC100133678, CD86, HLA-DRB4, HLA-DPA1, HLA-DOA, HLA-DRA, CD28                           | 13 | 8.95  | 9.25E-09 |
| hsa05340:Primary immunodeficiency            | CIITA, PTPRC, CD8A, CD3D, CD8B, CD3E, ICOS, LCK, CD4, JAK3, IL7R                                                                                                          | 11 | 10.16 | 5.20E-08 |
| hsa05416:Viral myocarditis                   | HLA-DQB1, ITGAL, PRF1, HLA-DRB1, LOC100133583, HLA-DMB, HLA-DMA, HLA-DQA1, HLA-F, LOC100133678, CD86, RAC2, HLA-DRB4, HLA-DPA1, HLA-DOA, CD28, HLA-DRA                    | 14 | 6.86  | 6.36E-08 |
| hsa04062:Chemokine signaling pathway         | ITK, FGR, CCR1, CXCL9, CCL8, STAT1, CCL5, CXCL11, CCL18, CCL17, CCL26, CXCL10, PRKCB, CCL22, CCL13, CCR7, CCR5, RAC2, CCR2, PIK3R5, JAK3, XCL1                            | 22 | 3.91  | 1.04E-07 |
| hsa05310:Asthma                              | FCER1A, HLA-DQB1, LOC100133678, HLA-DRB1, HLA-DRB4, LOC100133583, HLA-DPA1, HLA-DMB, HLA-DOA, HLA-DMA, HLA-DQA1, HLA-DRA                                                  | 9  | 10.78 | 8.83E-07 |
| hsa05322:Systemic lupus erythematosus        | HLA-DQB1, HLA-DRB1, GRIN2A, LOC100133583, HLA-DMB, HLA-DMA, C1QC, HLA-DQA1, LOC100133678, C1QB, CD86, FCGR2B, FCGR2C, HLA-DRB4, HLA-DPA1, HLA-DOA, CD28, HLA-DRA          | 14 | 5.52  | 9.09E-07 |

|                                                       |                                                                                                                                    |    |      |             |
|-------------------------------------------------------|------------------------------------------------------------------------------------------------------------------------------------|----|------|-------------|
| hsa04672:Intestinal immune network for IgA production | HLA-DQB1, HLA-DRB1, LOC100133583, HLA-DMB, HLA-DMA, HLA-DQA1, LOC100133678, CD86, ICOS, HLA-DRB4, HLA-DPA1, HLA-DOA, CD28, HLA-DRA | 11 | 7.57 | 1.07E-06    |
| hsa04660:T cell receptor signaling pathway            | PTPRC, ITK, CD3D, CD8A, CD3E, CD8B, PRKCQ, ICOS, LCK, PIK3R5, NFATC4, CD4, LCP2, CD28                                              | 14 | 4.23 | 1.90E-05    |
| hsa04650:Natural killer cell mediated cytotoxicity    | PRF1, ITGAL, MICB, KLRK1, GZMB, PRKCB, IFNAR2, RAC2, LCK, PIK3R5, NFATC4, KLRC1, LCP2, TYROBP                                      | 14 | 3.54 | 1.28E-04    |
| hsa04620:Toll-like receptor signaling pathway         | IFNAR2, CD86, TLR1, CXCL9, IL1B, PIK3R5, IL12B, CXCL11, STAT1, CCL5, CXCL10                                                        | 11 | 3.59 | 8.20E-04    |
| hsa04630:Jak-STAT signaling pathway                   | LIF, IFNAR2, IL2RB, IL12RB1, IL7, IL10RA, CSF2RB, PIK3R5, IL12B, JAK3, IL7R, STAT1, IL22RA2                                        | 13 | 2.77 | 0.002248905 |

**Supplemental Table 7. KEGG pathways upregulated in AT/AU.**

| <b>Terms</b>                            | <b>Genes</b>                                                                                                                                                                                                                                                                                                                                         | <b>Count</b> | <b>Fold Enrichment</b> | <b>PValue</b> |
|-----------------------------------------|------------------------------------------------------------------------------------------------------------------------------------------------------------------------------------------------------------------------------------------------------------------------------------------------------------------------------------------------------|--------------|------------------------|---------------|
| hsa04640:Hematopoietic cell lineage     | IL1R2, TNF, HLA-DRB1, CD8A, CD8B, HLA-DRB3, CSF1, ANPEP, KIT, IL7R, ITGAM, FLT3LG, GP1BB, LOC652799, CD2, HLA-DRB4, MS4A1, IL1B, CD22, CD4, CSF1R, CR1, CD3G, CD3D, IL7, CD3E, CD1C, CD1B, CD1A, IL11RA, CD1E, CD33, EPOR, LOC653882, CD14, HLA-DRA                                                                                                  | 33           | 3.45                   | 1.32E-10      |
| hsa04514:Cell adhesion molecules (CAMs) | HLA-DQB1, ITGAL, CADM3, CADM1, HLA-DRB1, CD8A, CD8B, HLA-DRB3, LOC100133583, ITGB2, HLA-DMB, HLA-DMA, ITGAM, LOC100133678, PVRL3, ITGB7, ICOS, HLA-DRB4, CD2, CD22, CD4, HLA-DPB1, HLA-DOA, SELPLG, HLA-DOB, NEGR1, CD28, ICAM1, SELP, PTPRC, PTPRM, NRXN3, SELL, NLGN1, CD40, HLA-DQA1, HLA-F, SIGLEC1, CD86, ITGA8, CNTN2, HLA-DPA1, JAM2, HLA-DRA | 41           | 2.81                   | 7.29E-10      |
| hsa05330:Allograft rejection            | HLA-DQB1, PRF1, TNF, HLA-DRB1, HLA-DRB3, LOC100133583, GZMB, CD40, HLA-DMB, HLA-DMA, HLA-DQA1, HLA-F, LOC100133678, CD86, HLA-DRB4, HLA-DPA1, HLA-DPB1, IL12B, HLA-DOA, HLA-DOB, CD28, HLA-DRA                                                                                                                                                       | 19           | 5.05                   | 1.55E-09      |

|                                      |                                                                                                                                                                                                                                                                                                                                                             |    |      |          |
|--------------------------------------|-------------------------------------------------------------------------------------------------------------------------------------------------------------------------------------------------------------------------------------------------------------------------------------------------------------------------------------------------------------|----|------|----------|
| hsa04062:Chemokine signaling pathway | ADCY1, ADCY2, ADCY5, PREX1, CXCL11, CXCL10, PLCB4, CCL3L1, CCL3L3, CXCR6, GNG2, PRKACB, PLCB1, SHC2, PLCB2, GNG7, SHC4, CCNL2, PRKCB, CCR7, CCR6, CX3CR1, CCR2, FGR, CCR1, CXCL9, ADRBK2, CCL8, CCL5, CCL4, CCL28, CCL27, CCL26, DOCK2, CCL22, CCL23, RAC2, SOS1, PIK3R5, ITK, HCK, CCL19, STAT1, CCL16, VAV1, CCL18, CCL17, CCL13, RAP1A, JAK2, JAK3, XCL1 | 50 | 2.41 | 2.66E-09 |
| hsa04940:Type I diabetes mellitus    | HLA-DQB1, PRF1, ICA1, TNF, HLA-DRB1, HLA-DRB3, LOC100133583, GZMB, HLA-DMB, HLA-DMA, HLA-DQA1, HLA-F, LOC100133678, CD86, HLA-DRB4, IL1B, HLA-DPA1, HLA-DPB1, IL12B, HLA-DOA, HLA-DOB, CD28, HLA-DRA                                                                                                                                                        | 20 | 4.50 | 6.55E-09 |
| hsa05332:Graft-versus-host disease   | HLA-DQB1, PRF1, TNF, HLA-DRB1, HLA-DRB3, LOC100133583, GZMB, HLA-DMB, HLA-DMA, HLA-DQA1, HLA-F, LOC100133678, CD86, HLA-DRB4, IL1B, HLA-DPA1, HLA-DPB1, HLA-DOA, HLA-DOB, KLRC1, CD28, HLA-DRA                                                                                                                                                              | 19 | 4.63 | 9.78E-09 |
| hsa05310:Asthma                      | HLA-DQB1, FCER1A, TNF, HLA-DRB1, HLA-DRB3, PRG2, LOC100133583, CD40, HLA-DMB, HLA-DMA, HLA-DQA1, LOC100133678, HLA-DRB4, MS4A2, HLA-DPA1, HLA-DPB1, HLA-DOA, HLA-DOB, HLA-DRA                                                                                                                                                                               | 16 | 5.20 | 2.70E-08 |



|                                                       |                                                                                                                                                                                                                                                                                                                                                                                                                                                                                       |    |      |          |
|-------------------------------------------------------|---------------------------------------------------------------------------------------------------------------------------------------------------------------------------------------------------------------------------------------------------------------------------------------------------------------------------------------------------------------------------------------------------------------------------------------------------------------------------------------|----|------|----------|
| hsa04060:Cytokine-cytokine receptor interaction       | IL6ST, IL21R, TNFSF13, IL15, TNFSF12, CXCL11, CXCL10, FLT3LG, TNFRSF11A, CCL3L1, IL1RAP, CCL3L3, CXCR6, IL1B, LTB, IL18RAP, CD40, EDAR, IL11RA, CCNL2, IFNAR2, CCR7, CCR6, CX3CR1, CCR2, LOC653882, IL12B, TNFSF12-TNFSF13, IL1R2, TNF, TNFRSF25, CCR1, CSF1, CXCL9, CCL8, KIT, IL7R, CCL5, CCL28, CCL4, CCL27, CCL26, CCL22, TNFRSF1B, IL12RB1, CCL23, LOC652799, IL10RA, CD27, CSF1R, IL2RB, IL7, FLT4, CCL19, HGF, CCL16, CCL18, CCL17, TNFSF8, CCL13, EPOR, BMPR1B, XCL1, IL22RA2 | 58 | 2.00 | 1.93E-07 |
| hsa04672:Intestinal immune network for IgA production | HLA-DQB1, HLA-DRB1, HLA-DRB3, TNFSF13, LOC100133583, TNFSF12, CD40, IL15, HLA-DMB, HLA-DMA, CCL28, CCL27, HLA-DQA1, LOC100133678, CD86, ICOS, ITGB7, HLA-DRB4, HLA-DPA1, HLA-DPB1, TNFSF12-TNFSF13, HLA-DOA, HLA-DOB, CD28, HLA-DRA                                                                                                                                                                                                                                                   | 20 | 3.73 | 2.75E-07 |
| hsa05340:Primary immunodeficiency                     | CIITA, PTPRC, CD3D, CD8A, CD8B, CD3E, CD40, IL7R, ADA, TAP2, ICOS, LCK, TAP1, ZAP70, CD4, JAK3                                                                                                                                                                                                                                                                                                                                                                                        | 16 | 4.01 | 2.10E-06 |
| hsa04612:Antigen processing and presentation          | HLA-DQB1, CD8A, HLA-DRB1, CD8B, HLA-DRB3, IFI30, LOC100133583, NFYB, HLA-DMB, HLA-DMA, B2M, LOC100133678, TAP2, TAP1, HSPA6, HLA-DRB4, HSPA7, CD4, HLA-DPB1, HSPA5, HLA-DOA, HLA-DOB, CIITA, CTSS, HLA-DQA1, HLA-F, LOC400750, HLA-DPA1, KLRC1, HLA-DRA                                                                                                                                                                                                                               | 25 | 2.81 | 2.76E-06 |

|                                                    |                                                                                                                                                                                                                                                                                               |    |      |             |
|----------------------------------------------------|-----------------------------------------------------------------------------------------------------------------------------------------------------------------------------------------------------------------------------------------------------------------------------------------------|----|------|-------------|
| hsa05416:Viral myocarditis                         | HLA-DQB1, ITGAL, ICAM1, PRF1, HLA-DRB1, HLA-DRB3, LOC100133583, ITGB2, CD40, HLA-DMB, HLA-DMA, HLA-DQA1, HLA-F, LOC100133678, CD86, SGCG, RAC2, HLA-DRB4, MYH11, HLA-DPA1, HLA-DPB1, HLA-DOA, HLA-DOB, CD28, HLA-DRA                                                                          | 22 | 2.93 | 6.47E-06    |
| hsa05320:Autoimmune thyroid disease                | HLA-DQB1, TG, PRF1, HLA-DRB1, HLA-DRB3, LOC100133583, GZMB, CD40, HLA-DMB, HLA-DMA, HLA-DQA1, HLA-F, LOC100133678, CD86, HLA-DRB4, HLA-DPA1, HLA-DPB1, HLA-DOA, HLA-DOB, CD28, HLA-DRA                                                                                                        | 18 | 3.36 | 7.19E-06    |
| hsa05322:Systemic lupus erythematosus              | HLA-DQB1, TNF, HLA-DRB1, HIST1H2AG, C6, HLA-DRB3, LOC100133583, HLA-DMB, HLA-DMA, C1QC, LOC100133678, HLA-DRB4, HLA-DPB1, HLA-DOA, HLA-DOB, CD28, GRIN2A, CD40, H2AFJ, HLA-DQA1, C1QB, CD86, FCGR2B, FCGR2C, HIST1H2AI, HIST1H2AH, HIST1H2AK, HLA-DPA1, FCGR2A, HIST1H2AM, HIST1H2AL, HLA-DRA | 23 | 2.46 | 7.72E-05    |
| hsa04660:T cell receptor signaling pathway         | PTPRC, ITK, TNF, CD3G, CD3D, CD8A, CD8B, CD3E, MALT1, VAV1, PAK6, LAT, PRKCQ, ICOS, SOS1, RASGRP1, LCK, ZAP70, PIK3R5, NFATC4, CD4, CD28, LCP2                                                                                                                                                | 23 | 1.89 | 0.003799116 |
| hsa04650:Natural killer cell mediated cytotoxicity | PRF1, ITGAL, MICB, MICA, TNF, KLRK1, ITGB2, CD48, RAC2, SOS1, ZAP70, PIK3R5, NFATC4, SHC2, TYROBP, SHC4, ICAM1, GZMB, VAV1, PRKCB, IFNAR2, LAT, LCK, KLRC1, LCP2                                                                                                                              | 25 | 1.71 | 0.008643092 |
| hsa05414:Dilated cardiomyopathy                    | ADCY1, SLC8A1, ADCY2, TNF, ADCY5, CACNB1, ITGA10, TTN, TPM2, CACNA2D4, SGCG, ITGB7, ITGA8, PLN, ITGA7, RYR2, GNAS, PRKACB, CACNA1D                                                                                                                                                            | 19 | 1.87 | 0.010033937 |

|                                             |                                                                                                                                                                                                                                   |    |      |             |
|---------------------------------------------|-----------------------------------------------------------------------------------------------------------------------------------------------------------------------------------------------------------------------------------|----|------|-------------|
| hsa04270:Vascular smooth muscle contraction | KCNMA1, KCNMB4, ADCY1, ADCY2, ADORA2A, ADCY5, MRV1, ARHGEF12, KCNMB1, ITPR1, ITPR2, PRKCB, PRKCQ, PLCB4, MYH11, GNAS, PRKACB, PLCB1, PLA2G3, CACNA1D, PLCB2, PLA2G5                                                               | 22 | 1.74 | 0.012265283 |
| hsa04020:Calcium signaling pathway          | ADCY1, ADCY2, ERBB4, ADORA2A, CAMK2G, TACR1, LHCGR, ATP2B2, PLCB4, PDE1A, CAMK2D, PLCD4, PRKACB, PLCB1, PLCB2, SLC8A1, PTGER3, GRIN2A, ITPR1, ITPR2, PRKCB, ADRB2, P2RX1, CHRM3, ATP2A3, PLN, CHRM1, CACNA1G, RYR2, GNAS, CACNA1D | 31 | 1.55 | 0.01304301  |
| hsa04912:GnRH signaling pathway             | PLD1, ADCY1, ADCY2, ADCY5, CAMK2G, ITPR1, ITPR2, PRKCB, PLCB4, MAP3K3, SOS1, CAMK2D, GNAS, PRKACB, PLCB1, PLA2G3, CACNA1D, PLCB2, PLA2G5                                                                                          | 19 | 1.72 | 0.023510417 |
| hsa04720:Long-term potentiation             | ADCY1, PLCB4, GRIA2, CAMK2G, CREBBP, CAMK2D, GRIN2A, RAP1A, PRKACB, PLCB1, PLCB2, ITPR1, ITPR2, PRKCB                                                                                                                             | 14 | 1.81 | 0.040205858 |

**Supplemental Table 8. Affymetrix Probe Set IDs assigned to the brown and green modules by WGCNA**

| ProbeSetID   | GeneSymbol       | Entrez.Gene    | moduleColor |
|--------------|------------------|----------------|-------------|
| 117_at       | HSPA6            | 3310           | brown       |
| 1431_at      | CYP2E1           | 1571           | brown       |
| 1552278_a_at | SLC46A1          | 113235         | brown       |
| 1552279_a_at | SLC46A1          | 113235         | brown       |
| 1552365_at   | SCIN             | 85477          | brown       |
| 1552390_a_at | C8orf47          | 203111         | brown       |
| 1552487_a_at | BNC1             | 646            | brown       |
| 1552496_a_at | COBL             | 23242          | brown       |
| 1552511_a_at | CPA6             | 57094          | brown       |
| 1552546_a_at | LETM2            | 137994         | brown       |
| 1552578_a_at | MYO3B            | 140469         | brown       |
| 1552618_at   | STX6             | 10228          | brown       |
| 1552620_at   | SPRR4            | 163778         | brown       |
| 1552626_a_at | TMEM163          | 81615          | brown       |
| 1552703_s_at | CARD16 /// CASP1 | 834 /// 114769 | brown       |
| 1552721_a_at | FGF1             | 2246           | brown       |
| 1552755_at   | C9orf66          | 157983         | brown       |
| 1552807_a_at | SIGLEC10         | 89790          | brown       |
| 1552903_at   | B4GALNT2         | 124872         | brown       |
| 1553023_a_at | NOX5             | 79400          | brown       |
| 1553202_at   | STOX1            | 219736         | brown       |
| 1553226_at   | LINC00052        | 145978         | brown       |
| 1553288_a_at | NYAP1            | 222950         | brown       |
| 1553310_at   | PLB1             | 151056         | brown       |
| 1553311_at   | C20orf197        | 284756         | brown       |
| 1553352_x_at | ERVW-1           | 30816          | brown       |
| 1553388_at   | FAM26D           | 221301         | brown       |
| 1553425_at   | WDR65            | 149465         | brown       |
| 1553493_a_at | TDH              | 157739         | brown       |
| 1553494_at   | TDH              | 157739         | brown       |
| 1553534_at   | NLRP10           | 338322         | brown       |
| 1553537_at   | KRT73            | 319101         | brown       |
| 1553539_at   | KRT74            | 121391         | brown       |
| 1553574_at   | IFNE             | 338376         | brown       |
| 1553672_at   | ENAH             | 55740          | brown       |
| 1553691_at   | B3GALNT2         | 148789         | brown       |
| 1553697_at   | CCSAP            | 126731         | brown       |
| 1553710_at   | FAM218A          | 152756         | brown       |
| 1553711_a_at | FAM218A          | 152756         | brown       |

|              |                        |                   |       |
|--------------|------------------------|-------------------|-------|
| 1553722_s_at | RNF152                 | 220441            | brown |
| 1553734_at   | AK7                    | 122481            | brown |
| 1553829_at   | CYP1B1-AS1             | 285154            | brown |
| 1553861_at   | TCP11L2                | 255394            | brown |
| 1553915_at   | C10orf126              | 283080            | brown |
| 1553972_a_at | CBS                    | 875               | brown |
| 1553976_a_at | DPCD                   | 25911             | brown |
| 1554067_at   | C12orf66               | 144577            | brown |
| 1554068_s_at | C12orf66               | 144577            | brown |
| 1554097_a_at | MIR31HG                | 554202            | brown |
| 1554127_s_at | MSRB3                  | 253827            | brown |
| 1554333_at   | DNAJA4                 | 55466             | brown |
| 1554334_a_at | DNAJA4                 | 55466             | brown |
| 1554398_at   | LYG2                   | 254773            | brown |
| 1554411_at   | CTNNB1                 | 1499              | brown |
| 1554438_at   | KIAA1217               | 56243             | brown |
| 1554450_s_at | MIER3                  | 166968            | brown |
| 1554524_a_at | OLFM3                  | 118427            | brown |
| 1554572_a_at | SUV39H2                | 79723             | brown |
| 1554592_a_at | SLC1A6                 | 6511              | brown |
| 1554593_s_at | SLC1A6                 | 6511              | brown |
| 1554609_at   | LOC100287896           | 100287896         | brown |
| 1554795_a_at | FBLIM1                 | 54751             | brown |
| 1554804_a_at | CLDN19                 | 149461            | brown |
| 1555006_at   | WDR66                  | 144406            | brown |
| 1555007_s_at | WDR66                  | 144406            | brown |
| 1555074_a_at | KCNH5                  | 27133             | brown |
| 1555151_s_at | TDH                    | 157739            | brown |
| 1555192_at   | ZNF277                 | 11179             | brown |
| 1555299_s_at | ERVW-1                 | 30816             | brown |
| 1555401_at   | SOHLH2                 | 54937             | brown |
| 1555462_at   | PPP1R1C                | 151242            | brown |
| 1555480_a_at | FBLIM1                 | 54751             | brown |
| 1555673_at   | KRTAP2-3 /// KRTAP2-4  | 85294 /// 730755  | brown |
| 1555774_at   | ZAR1                   | 326340            | brown |
| 1555775_a_at | ZAR1                   | 326340            | brown |
| 1555872_a_at | LOC728903 /// MGC21881 | 389741 /// 728903 | brown |
| 1555971_s_at | FBXO28                 | 23219             | brown |
| 1556037_s_at | HHIP                   | 64399             | brown |
| 1556410_a_at | KRTAP19-1              | 337882            | brown |
| 1556421_at   | LOC286189              | 286189            | brown |
| 1556423_at   | VASH1                  | 22846             | brown |
| 1556425_a_at | LOC284219              | 284219            | brown |

|              |              |           |       |
|--------------|--------------|-----------|-------|
| 1556533_at   | LINC00868    | 283994    | brown |
| 1556619_at   | SHISA9       | 729993    | brown |
| 1556755_s_at | LOC286149    | 286149    | brown |
| 1556842_at   | LOC286087    | 286087    | brown |
| 1557071_s_at | NUB1         | 51667     | brown |
| 1557122_s_at | GABRB2       | 2561      | brown |
| 1557321_a_at | CAPN14       | 440854    | brown |
| 1557347_at   | MCPH1        | 79648     | brown |
| 1557458_s_at | SHB          | 6461      | brown |
| 1557545_s_at | RNF165       | 494470    | brown |
| 1557914_s_at | ERVFH21-1    | 100616104 | brown |
| 1557984_s_at | RPAP3        | 79657     | brown |
| 1558050_at   | EIF2B5       | 8893      | brown |
| 1558177_at   | TMEM229B     | 161145    | brown |
| 1558356_at   | UACA         | 55075     | brown |
| 1558387_at   | UG0898H09    | 643763    | brown |
| 1558388_a_at | UG0898H09    | 643763    | brown |
| 1558540_s_at | SLC2A11      | 66035     | brown |
| 1558577_at   | LOC148709    | 148709    | brown |
| 1558687_a_at | FOXN1        | 8456      | brown |
| 1558816_at   | ZNF664       | 144348    | brown |
| 1558920_at   | SLC8A1-AS1   | 100128590 | brown |
| 1559256_at   | MAGI1        | 9223      | brown |
| 1559433_at   | APCDD1L-AS1  | 149773    | brown |
| 1559715_at   | LOC100507391 | 100507391 | brown |
| 1559870_at   | LOC100129129 | 100129129 | brown |
| 1559960_x_at | SYCE1L       | 100130958 | brown |
| 1560011_at   | JRK          | 8629      | brown |
| 1560514_at   | LINC00636    | 285205    | brown |
| 1560553_at   | TIAF1        | 9220      | brown |
| 1560803_at   | DNAH3        | 55567     | brown |
| 1560897_a_at | KRTAP10-11   | 386678    | brown |
| 1560988_a_at | LINC00556    | 100861551 | brown |
| 1561030_at   | TMC7         | 79905     | brown |
| 1561330_at   | DSG4         | 147409    | brown |
| 1562628_at   | KRT40        | 125115    | brown |
| 1562629_a_at | KRT40        | 125115    | brown |
| 1563834_a_at | AKNAD1       | 254268    | brown |
| 1564274_at   | C9orf47      | 286223    | brown |
| 1564435_a_at | KRT72        | 140807    | brown |
| 1564803_at   | KRTAP11-1    | 337880    | brown |
| 1564921_at   | KRTAP13-1    | 140258    | brown |

|              |                  |                |       |
|--------------|------------------|----------------|-------|
| 1564960_at   | KRTAP7-1         | 337878         | brown |
| 1564974_at   | KRTAP8-1         | 337879         | brown |
| 1565546_at   | RNF141           | 50862          | brown |
| 1566987_s_at | LINC00674        | 100499466      | brown |
| 1568592_at   | TRIM69           | 140691         | brown |
| 1568954_s_at | C16orf72         | 29035          | brown |
| 1569064_at   | C15orf62         | 643338         | brown |
| 1569065_s_at | C15orf62         | 643338         | brown |
| 1569369_at   | ZFYVE28          | 57732          | brown |
| 1569387_at   | CSGALNACT1       | 55790          | brown |
| 1569433_at   | SAMD5            | 389432         | brown |
| 1569701_at   | PER3             | 8863           | brown |
| 1569852_at   | LSMEM1           | 286006         | brown |
| 1569886_a_at | GLB1L3           | 112937         | brown |
| 1570156_s_at | FMN1             | 342184         | brown |
| 1570163_at   | EGFLAM-AS4       | 100852408      | brown |
| 1570505_at   | ABCB4            | 5244           | brown |
| 200644_at    | MARCKSL1         | 65108          | brown |
| 200730_s_at  | PTP4A1           | 7803           | brown |
| 200731_s_at  | PTP4A1           | 7803           | brown |
| 200744_s_at  | GNB1             | 2782           | brown |
| 200790_at    | ODC1             | 4953           | brown |
| 200838_at    | CTSB             | 1508           | brown |
| 200906_s_at  | PALLD            | 23022          | brown |
| 200923_at    | LGALS3BP         | 3959           | brown |
| 200924_s_at  | SLC3A2           | 6520           | brown |
| 200998_s_at  | CKAP4            | 10970          | brown |
| 201037_at    | PFKP             | 5214           | brown |
| 201043_s_at  | ANP32A           | 8125           | brown |
| 201051_at    | ANP32A           | 8125           | brown |
| 201109_s_at  | THBS1            | 7057           | brown |
| 201110_s_at  | THBS1            | 7057           | brown |
| 201147_s_at  | TIMP3            | 7078           | brown |
| 201148_s_at  | TIMP3            | 7078           | brown |
| 201149_s_at  | TIMP3            | 7078           | brown |
| 201150_s_at  | TIMP3            | 7078           | brown |
| 201206_s_at  | RRBP1            | 6238           | brown |
| 201208_s_at  | TNFAIP1          | 7126           | brown |
| 201266_at    | TXNRD1           | 7296           | brown |
| 201340_s_at  | ENC1             | 8507           | brown |
| 201341_at    | ENC1             | 8507           | brown |
| 201422_at    | IFI30 /// PIK3R2 | 5296 /// 10437 | brown |

|             |          |       |       |
|-------------|----------|-------|-------|
| 201430_s_at | DPYSL3   | 1809  | brown |
| 201506_at   | TGFBI    | 7045  | brown |
| 201521_s_at | NCBP2    | 22916 | brown |
| 201559_s_at | CLIC4    | 25932 | brown |
| 201616_s_at | CALD1    | 800   | brown |
| 201631_s_at | IER3     | 8870  | brown |
| 201645_at   | TNC      | 3371  | brown |
| 201723_s_at | GALNT1   | 2589  | brown |
| 201767_s_at | ELAC2    | 60528 | brown |
| 201846_s_at | RYBP     | 23429 | brown |
| 201848_s_at | BNIP3    | 664   | brown |
| 201860_s_at | PLAT     | 5327  | brown |
| 201871_s_at | UBXN1    | 51035 | brown |
| 201925_s_at | CD55     | 1604  | brown |
| 201981_at   | PAPPA    | 5069  | brown |
| 202016_at   | MEST     | 4232  | brown |
| 202066_at   | PPFIA1   | 8500  | brown |
| 202075_s_at | PLTP     | 5360  | brown |
| 202103_at   | BRD4     | 23476 | brown |
| 202147_s_at | IFRD1    | 3475  | brown |
| 202166_s_at | PPP1R2   | 5504  | brown |
| 202178_at   | PRKCZ    | 5590  | brown |
| 202206_at   | ARL4C    | 10123 | brown |
| 202207_at   | ARL4C    | 10123 | brown |
| 202208_s_at | ARL4C    | 10123 | brown |
| 202272_s_at | FBXO28   | 23219 | brown |
| 202290_at   | PDAP1    | 11333 | brown |
| 202295_s_at | CTSH     | 1512  | brown |
| 202307_s_at | TAP1     | 6890  | brown |
| 202357_s_at | CFB      | 629   | brown |
| 202376_at   | SERPINA3 | 12    | brown |
| 202391_at   | BASP1    | 10409 | brown |
| 202416_at   | DNAJC7   | 7266  | brown |
| 202435_s_at | CYP1B1   | 1545  | brown |
| 202436_s_at | CYP1B1   | 1545  | brown |
| 202458_at   | PRSS23   | 11098 | brown |
| 202461_at   | EIF2B2   | 8892  | brown |
| 202468_s_at | CTNNA1   | 8727  | brown |
| 202531_at   | IRF1     | 3659  | brown |
| 202570_s_at | DLGAP4   | 22839 | brown |
| 202613_at   | CTPS1    | 1503  | brown |
| 202626_s_at | LYN      | 4067  | brown |
| 202659_at   | PSMB10   | 5699  | brown |



|             |          |        |       |
|-------------|----------|--------|-------|
| 202679_at   | NPC1     | 4864   | brown |
| 202693_s_at | STK17A   | 9263   | brown |
| 202695_s_at | STK17A   | 9263   | brown |
| 202744_at   | SLC20A2  | 6575   | brown |
| 202752_x_at | SLC7A8   | 23428  | brown |
| 202793_at   | LPCAT3   | 10162  | brown |
| 202805_s_at | ABCC1    | 4363   | brown |
| 202833_s_at | SERPINA1 | 5265   | brown |
| 202883_s_at | PPP2R1B  | 5519   | brown |
| 202884_s_at | PPP2R1B  | 5519   | brown |
| 202886_s_at | PPP2R1B  | 5519   | brown |
| 202889_x_at | MAP7     | 9053   | brown |
| 202895_s_at | SIRPA    | 140885 | brown |
| 202896_s_at | SIRPA    | 140885 | brown |
| 202897_at   | SIRPA    | 140885 | brown |
| 202923_s_at | GCLC     | 2729   | brown |
| 202935_s_at | SOX9     | 6662   | brown |
| 202936_s_at | SOX9     | 6662   | brown |
| 202949_s_at | FHL2     | 2274   | brown |
| 202969_at   | DYRK2    | 8445   | brown |
| 202990_at   | PYGL     | 5836   | brown |
| 203004_s_at | MEF2D    | 4209   | brown |
| 203016_s_at | SSX2IP   | 117178 | brown |
| 203017_s_at | SSX2IP   | 117178 | brown |
| 203018_s_at | SSX2IP   | 117178 | brown |
| 203021_at   | SLPI     | 6590   | brown |
| 203087_s_at | KIF2A    | 3796   | brown |
| 203129_s_at | KIF5C    | 3800   | brown |
| 203130_s_at | KIF5C    | 3800   | brown |
| 203148_s_at | TRIM14   | 9830   | brown |
| 203150_at   | RABEPK   | 10244  | brown |
| 203158_s_at | GLS      | 2744   | brown |
| 203184_at   | FBN2     | 2201   | brown |
| 203221_at   | TLE1     | 7088   | brown |
| 203222_s_at | TLE1     | 7088   | brown |
| 203236_s_at | LGALS9   | 3965   | brown |
| 203287_at   | LAD1     | 3898   | brown |
| 203304_at   | BAMBI    | 25805  | brown |
| 203349_s_at | ETV5     | 2119   | brown |
| 203355_s_at | PSD3     | 23362  | brown |
| 203367_at   | DUSP14   | 11072  | brown |
| 203413_at   | NELL2    | 4753   | brown |
| 203417_at   | MFAP2    | 4237   | brown |

|             |                      |                  |       |
|-------------|----------------------|------------------|-------|
| 203560_at   | GGH                  | 8836             | brown |
| 203570_at   | LOXL1                | 4016             | brown |
| 203574_at   | NFIL3                | 4783             | brown |
| 203596_s_at | IFIT5                | 24138            | brown |
| 203650_at   | PROCR                | 10544            | brown |
| 203693_s_at | E2F3                 | 1871             | brown |
| 203705_s_at | FZD7                 | 8324             | brown |
| 203706_s_at | FZD7                 | 8324             | brown |
| 203707_at   | LINC00921 /// ZNF263 | 10127 /// 283876 | brown |
| 203742_s_at | LOC732360 /// TDG    | 6996 /// 732360  | brown |
| 203764_at   | DLGAP5               | 9787             | brown |
| 203790_s_at | HRSP12               | 10247            | brown |
| 203797_at   | VSNL1                | 7447             | brown |
| 203798_s_at | VSNL1                | 7447             | brown |
| 203821_at   | HBEGF                | 1839             | brown |
| 203827_at   | WIPI1                | 55062            | brown |
| 203842_s_at | MAPRE3               | 22924            | brown |
| 203882_at   | IRF9                 | 10379            | brown |
| 203904_x_at | CD82                 | 3732             | brown |
| 203921_at   | CHST2                | 9435             | brown |
| 203925_at   | GCLM                 | 2730             | brown |
| 203929_s_at | MAPT                 | 4137             | brown |
| 203935_at   | ACVR1                | 90               | brown |
| 203968_s_at | CDC6                 | 990              | brown |
| 203987_at   | FZD6                 | 8323             | brown |
| 204141_at   | TUBB2A               | 7280             | brown |
| 204197_s_at | RUNX3                | 864              | brown |
| 204198_s_at | RUNX3                | 864              | brown |
| 204256_at   | ELOVL6               | 79071            | brown |
| 204268_at   | S100A2               | 6273             | brown |
| 204279_at   | PSMB9                | 5698             | brown |
| 204284_at   | PPP1R3C              | 5507             | brown |
| 204306_s_at | CD151                | 977              | brown |
| 204351_at   | S100P                | 6286             | brown |
| 204378_at   | BCAS1                | 8537             | brown |
| 204394_at   | SLC43A1              | 8501             | brown |
| 204448_s_at | PDCL                 | 5082             | brown |
| 204501_at   | NOV                  | 4856             | brown |
| 204541_at   | SEC14L2              | 23541            | brown |
| 204556_s_at | DZIP1                | 22873            | brown |
| 204557_s_at | DZIP1                | 22873            | brown |
| 204614_at   | SERPINB2             | 5055             | brown |
| 204656_at   | SHB                  | 6461             | brown |

|             |                   |                 |       |
|-------------|-------------------|-----------------|-------|
| 204657_s_at | SHB               | 6461            | brown |
| 204665_at   | SIKE1             | 80143           | brown |
| 204687_at   | PARM1             | 25849           | brown |
| 204705_x_at | ALDOB             | 229             | brown |
| 204720_s_at | DNAJC6            | 9829            | brown |
| 204730_at   | RIMS3             | 9783            | brown |
| 204733_at   | KLK6              | 5653            | brown |
| 204736_s_at | CSPG4             | 1464            | brown |
| 204751_x_at | DSC2              | 1824            | brown |
| 204761_at   | USP6NL            | 9712            | brown |
| 204790_at   | SMAD7             | 4092            | brown |
| 204818_at   | HSD17B2           | 3294            | brown |
| 204820_s_at | BTN3A2 /// BTN3A3 | 10384 /// 11118 | brown |
| 204821_at   | BTN3A3            | 10384           | brown |
| 204869_at   | PCSK2             | 5126            | brown |
| 204870_s_at | PCSK2             | 5126            | brown |
| 204903_x_at | ATG4B             | 23192           | brown |
| 204992_s_at | PFN2              | 5217            | brown |
| 204994_at   | MX2               | 4600            | brown |
| 205027_s_at | MAP3K8            | 1326            | brown |
| 205053_at   | PRIM1             | 5557            | brown |
| 205073_at   | CYP2J2            | 1573            | brown |
| 205081_at   | CRIP1             | 1396            | brown |
| 205093_at   | PLEKHA6           | 22874           | brown |
| 205125_at   | PLCD1             | 5333            | brown |
| 205138_s_at | UST               | 10090           | brown |
| 205139_s_at | UST               | 10090           | brown |
| 205150_s_at | TRIL              | 9865            | brown |
| 205151_s_at | TRIL              | 9865            | brown |
| 205157_s_at | JUP /// KRT17     | 3728 /// 3872   | brown |
| 205184_at   | GNG4              | 2786            | brown |
| 205249_at   | EGR2              | 1959            | brown |
| 205254_x_at | TCF7              | 6932            | brown |
| 205255_x_at | TCF7              | 6932            | brown |
| 205268_s_at | ADD2              | 119             | brown |
| 205289_at   | BMP2              | 650             | brown |
| 205290_s_at | BMP2              | 650             | brown |
| 205334_at   | S100A1            | 6271            | brown |
| 205374_at   | SLN               | 6588            | brown |
| 205375_at   | MDFI              | 4188            | brown |
| 205376_at   | INPP4B            | 8821            | brown |
| 205393_s_at | CHEK1             | 1111            | brown |
| 205436_s_at | H2AFX             | 3014            | brown |

|             |                     |                 |       |
|-------------|---------------------|-----------------|-------|
| 205471_s_at | DACH1               | 1602            | brown |
| 205472_s_at | DACH1               | 1602            | brown |
| 205515_at   | PRSS12              | 8492            | brown |
| 205518_s_at | CMAHP               | 8418            | brown |
| 205525_at   | CALD1               | 800             | brown |
| 205534_at   | PCDH7               | 5099            | brown |
| 205535_s_at | PCDH7               | 5099            | brown |
| 205551_at   | SV2B                | 9899            | brown |
| 205555_s_at | MSX2                | 4488            | brown |
| 205566_at   | ABHD2               | 11057           | brown |
| 205586_x_at | VGF                 | 7425            | brown |
| 205590_at   | RASGRP1             | 10125           | brown |
| 205592_at   | SLC4A1              | 6521            | brown |
| 205612_at   | MMRN1               | 22915           | brown |
| 205635_at   | KALRN               | 8997            | brown |
| 205637_s_at | SH3GL3              | 6457            | brown |
| 205676_at   | CYP27B1             | 1594            | brown |
| 205686_s_at | CD86                | 942             | brown |
| 205687_at   | UBFD1               | 56061           | brown |
| 205713_s_at | COMP                | 1311            | brown |
| 205724_at   | PKP1                | 5317            | brown |
| 205732_s_at | NCOA2               | 10499           | brown |
| 205747_at   | CBLN1               | 869             | brown |
| 205833_s_at | PART1               | 25859           | brown |
| 205841_at   | JAK2                | 3717            | brown |
| 205864_at   | SLC7A4              | 6545            | brown |
| 205899_at   | CCNA1               | 8900            | brown |
| 205918_at   | SLC4A3              | 6508            | brown |
| 205926_at   | IL27RA              | 9466            | brown |
| 205931_s_at | CREB5 /// LOC401317 | 9586 /// 401317 | brown |
| 205941_s_at | COL10A1             | 1300            | brown |
| 205988_at   | CD84                | 8832            | brown |
| 205990_s_at | WNT5A               | 7474            | brown |
| 206027_at   | S100A3              | 6274            | brown |
| 206044_s_at | BRAF                | 673             | brown |
| 206082_at   | HCP5                | 10866           | brown |
| 206089_at   | NELL1               | 4745            | brown |
| 206116_s_at | TPM1                | 7168            | brown |
| 206132_at   | MCC                 | 4163            | brown |
| 206137_at   | RIMS2               | 9699            | brown |
| 206140_at   | LHX2                | 9355            | brown |
| 206170_at   | ADRB2               | 154             | brown |
| 206171_at   | ADORA3              | 140             | brown |

|             |                        |                    |       |
|-------------|------------------------|--------------------|-------|
| 206191_at   | ENTPD3                 | 956                | brown |
| 206224_at   | CST1                   | 1469               | brown |
| 206235_at   | LIG4                   | 3981               | brown |
| 206237_s_at | NRG1                   | 3084               | brown |
| 206259_at   | PROC                   | 5624               | brown |
| 206312_at   | GUCY2C                 | 2984               | brown |
| 206315_at   | CRLF1                  | 9244               | brown |
| 206326_at   | GRP                    | 2922               | brown |
| 206356_s_at | GNAL                   | 2774               | brown |
| 206367_at   | REN                    | 5972               | brown |
| 206375_s_at | HSPB3                  | 8988               | brown |
| 206376_at   | SLC6A15                | 55117              | brown |
| 206382_s_at | BDNF                   | 627                | brown |
| 206423_at   | ANGPTL7                | 10218              | brown |
| 206439_at   | EPYC                   | 1833               | brown |
| 206447_at   | CELA2A /// CELA2B      | 51032 /// 63036    | brown |
| 206448_at   | ZNF365                 | 22891              | brown |
| 206504_at   | CYP24A1                | 1591               | brown |
| 206540_at   | GLB1L                  | 79411              | brown |
| 206581_at   | BNC1                   | 646                | brown |
| 206591_at   | RAG1                   | 5896               | brown |
| 206595_at   | CST6                   | 1474               | brown |
| 206604_at   | OVOL1                  | 5017               | brown |
| 206605_at   | ENDOU                  | 8909               | brown |
| 206665_s_at | BCL2L1                 | 598                | brown |
| 206677_at   | KRT31                  | 3881               | brown |
| 206693_at   | IL7                    | 3574               | brown |
| 206710_s_at | EPB41L3                | 23136              | brown |
| 206723_s_at | LPAR2                  | 9170               | brown |
| 206737_at   | WNT11                  | 7481               | brown |
| 206746_at   | BFSP1                  | 631                | brown |
| 206758_at   | EDN2                   | 1907               | brown |
| 206774_at   | FRMPD1                 | 22844              | brown |
| 206788_s_at | CBFB                   | 865                | brown |
| 206882_at   | SLC1A6                 | 6511               | brown |
| 206912_at   | FOXE1                  | 2304               | brown |
| 206935_at   | PCDH8                  | 5100               | brown |
| 206969_at   | KRT34 /// LOC100653049 | 3885 /// 100653049 | brown |
| 206972_s_at | GPR161                 | 23432              | brown |
| 206987_x_at | FGF18                  | 8817               | brown |
| 206994_at   | CST4                   | 1472               | brown |
| 207037_at   | TNFRSF11A              | 8792               | brown |
| 207062_at   | IAPP                   | 3375               | brown |

|             |                             |                            |       |
|-------------|-----------------------------|----------------------------|-------|
| 207065_at   | KRT75                       | 9119                       | brown |
| 207074_s_at | SLC18A1                     | 6570                       | brown |
| 207082_at   | CSF1                        | 1435                       | brown |
| 207113_s_at | TNF                         | 7124                       | brown |
| 207146_at   | KRT32                       | 3882                       | brown |
| 207147_at   | DLX2                        | 1746                       | brown |
| 207154_at   | DIO3                        | 1735                       | brown |
| 207192_at   | DNASE1L2                    | 1775                       | brown |
| 207195_at   | CNTN6                       | 27255                      | brown |
| 207268_x_at | ABI2                        | 10152                      | brown |
| 207344_at   | AKAP3                       | 10566                      | brown |
| 207354_at   | CCL16                       | 6360                       | brown |
| 207367_at   | ATP12A                      | 479                        | brown |
| 207457_s_at | LY6G6D                      | 58530                      | brown |
| 207547_s_at | FAM107A /// LOC101059937    | 11170 /// 101059937        | brown |
| 207669_at   | KRT83                       | 3889                       | brown |
| 207670_at   | KRT85                       | 3891                       | brown |
| 207716_at   | KRT38                       | 8687                       | brown |
| 207759_s_at | DISC1 /// TSNAX-DISC1       | 27185 /// 100303453        | brown |
| 207764_s_at | HIPK3                       | 10114                      | brown |
| 207787_at   | KRT33B                      | 3884                       | brown |
| 207826_s_at | ID3                         | 3399                       | brown |
| 207908_at   | KRT2                        | 3849                       | brown |
| 207955_at   | CCL27                       | 10850                      | brown |
| 207957_s_at | PRKCB                       | 5579                       | brown |
| 208002_s_at | ACOT7                       | 11332                      | brown |
| 208062_s_at | NRG2                        | 9542                       | brown |
| 208092_s_at | FAM49A                      | 81553                      | brown |
| 208161_s_at | ABCC3                       | 8714                       | brown |
| 208216_at   | DLX4                        | 1748                       | brown |
| 208250_s_at | DMBT1                       | 1755                       | brown |
| 208290_s_at | EIF5                        | 1983                       | brown |
| 208378_x_at | FGF5                        | 2250                       | brown |
| 208483_x_at | KRT33A                      | 3883                       | brown |
|             | HIST1H2BC /// HIST1H2BE /// |                            |       |
|             | HIST1H2BF /// HIST1H2BG /// | 8339 /// 8343 /// 8344 /// |       |
| 208490_x_at | HIST1H2BI                   | 8346 /// 8347              | brown |
|             | HIST1H2BC /// HIST1H2BE /// |                            |       |
|             | HIST1H2BF /// HIST1H2BG /// | 8339 /// 8343 /// 8344 /// |       |
| 208523_x_at | HIST1H2BI                   | 8346 /// 8347              | brown |
|             | HIST1H2BC /// HIST1H2BE /// |                            |       |
|             | HIST1H2BF /// HIST1H2BG /// | 8339 /// 8343 /// 8344 /// |       |
| 208527_x_at | HIST1H2BI                   | 8346 /// 8347              | brown |

|             |                             |                            |       |
|-------------|-----------------------------|----------------------------|-------|
| 208532_x_at | KRTAP5-8                    | 57830                      | brown |
| 208546_x_at | HIST1H2BH                   | 8345                       | brown |
| 208555_x_at | CST2                        | 1470                       | brown |
| 208579_x_at | H2BFS                       | 54145                      | brown |
|             | HIST1H2AG /// HIST1H2AH /// |                            |       |
|             | HIST1H2AI /// HIST1H2AJ /// | 8329 /// 8330 /// 8331 /// |       |
|             | HIST1H2AK /// HIST1H2AL /// | 8332 /// 8336 /// 8968 /// |       |
| 208583_x_at | HIST1H2AM /// HIST1H3F      | 8969 /// 85235             | brown |
| 208588_at   | FKSG2                       | 59347                      | brown |
| 208613_s_at | FLNB                        | 2317                       | brown |
| 208633_s_at | MACF1                       | 23499                      | brown |
| 208637_x_at | ACTN1                       | 87                         | brown |
| 208653_s_at | CD164                       | 8763                       | brown |
| 208702_x_at | APLP2                       | 334                        | brown |
| 208705_s_at | EIF5                        | 1983                       | brown |
| 208708_x_at | EIF5                        | 1983                       | brown |
| 208730_x_at | RAB2A                       | 5862                       | brown |
| 208785_s_at | MAP1LC3B                    | 81631                      | brown |
| 209062_x_at | NCOA3                       | 8202                       | brown |
| 209118_s_at | TUBA1A                      | 7846                       | brown |
| 209125_at   | KRT6A                       | 3853                       | brown |
| 209126_x_at | KRT6B                       | 3854                       | brown |
| 209152_s_at | TCF3                        | 6929                       | brown |
| 209162_s_at | PRPF4                       | 9128                       | brown |
| 209228_x_at | TUSC3                       | 7991                       | brown |
| 209242_at   | PEG3                        | 5178                       | brown |
| 209267_s_at | SLC39A8                     | 64116                      | brown |
| 209273_s_at | ISCA1                       | 81689                      | brown |
| 209280_at   | MRC2                        | 9902                       | brown |
| 209286_at   | CDC42EP3                    | 10602                      | brown |
| 209288_s_at | CDC42EP3                    | 10602                      | brown |
| 209343_at   | EFHD1                       | 80303                      | brown |
| 209369_at   | ANXA3                       | 306                        | brown |
| 209372_x_at | TUBB2A /// TUBB2B           | 7280 /// 347733            | brown |
| 209387_s_at | TM4SF1                      | 4071                       | brown |
| 209447_at   | SYNE1                       | 23345                      | brown |
| 209588_at   | EPHB2                       | 2048                       | brown |
| 209589_s_at | EPHB2                       | 2048                       | brown |
| 209591_s_at | BMP7                        | 655                        | brown |
| 209615_s_at | PAK1                        | 5058                       | brown |
| 209617_s_at | CTNND2                      | 1501                       | brown |
| 209618_at   | CTNND2                      | 1501                       | brown |
| 209626_s_at | OSBPL3                      | 26031                      | brown |

|             |                  |                |       |
|-------------|------------------|----------------|-------|
| 209631_s_at | GPR37 /// SEL1L2 | 2861 /// 80343 | brown |
| 209640_at   | PML              | 5371           | brown |
| 209683_at   | FAM49A           | 81553          | brown |
| 209685_s_at | PRKCB            | 5579           | brown |
| 209698_at   | CCHCR1           | 54535          | brown |
| 209757_s_at | MYCN             | 4613           | brown |
| 209792_s_at | KLK10            | 5655           | brown |
| 209793_at   | GRIA1            | 2890           | brown |
| 209799_at   | PRKAA1           | 5562           | brown |
| 209800_at   | KRT16            | 3868           | brown |
| 209806_at   | HIST1H2BK        | 85236          | brown |
| 209859_at   | TRIM9            | 114088         | brown |
| 209866_s_at | LPHN3            | 23284          | brown |
| 209867_s_at | LPHN3            | 23284          | brown |
| 209911_x_at | HIST1H2BD        | 3017           | brown |
| 209921_at   | SLC7A11          | 23657          | brown |
| 209933_s_at | CD300A           | 11314          | brown |
| 209938_at   | TADA2A           | 6871           | brown |
| 209945_s_at | GSK3B            | 2932           | brown |
| 209970_x_at | CASP1            | 834            | brown |
| 209975_at   | CYP2E1           | 1571           | brown |
| 209976_s_at | CYP2E1           | 1571           | brown |
| 209981_at   | CSDC2            | 27254          | brown |
| 210002_at   | GATA6            | 2627           | brown |
| 210007_s_at | GPD2             | 2820           | brown |
| 210020_x_at | CALML3           | 810            | brown |
| 210048_at   | NAPG             | 8774           | brown |
| 210074_at   | CTSL2            | 1515           | brown |
| 210082_at   | ABCA4            | 24             | brown |
| 210115_at   | RPL39L           | 116832         | brown |
| 210145_at   | PLA2G4A          | 5321           | brown |
| 210148_at   | HIPK3            | 10114          | brown |
| 210186_s_at | FKBP1A           | 2280           | brown |
| 210235_s_at | PPFIA1           | 8500           | brown |
| 210261_at   | KCNK2            | 3776           | brown |
| 210276_s_at | TRIOBP           | 11078          | brown |
| 210305_at   | PDE4DIP          | 9659           | brown |
| 210311_at   | FGF5             | 2250           | brown |
| 210319_x_at | MSX2             | 4488           | brown |
| 210335_at   | RASSF9           | 9182           | brown |
| 210385_s_at | ERAP1            | 51752          | brown |



|             |               |                |       |
|-------------|---------------|----------------|-------|
| 210387_at   | NCALD         | 83988          | brown |
| 210393_at   | LGR5          | 8549           | brown |
| 210419_at   | BARX2         | 8538           | brown |
| 210473_s_at | GPR125        | 166647         | brown |
| 210521_s_at | FETUB         | 26998          | brown |
| 210534_s_at | B9D1          | 27077          | brown |
| 210535_at   | B9D1          | 27077          | brown |
| 210568_s_at | RECQL         | 5965           | brown |
| 210571_s_at | CMAHP         | 8418           | brown |
| 210689_at   | CLDN14        | 23562          | brown |
| 210868_s_at | ELOVL6        | 79071          | brown |
| 210871_x_at | SSX2IP        | 117178         | brown |
| 210889_s_at | FCGR2B        | 2213           | brown |
| 210929_s_at | AHSG          | 197            | brown |
| 210942_s_at | ST3GAL6       | 10402          | brown |
| 210948_s_at | LEF1          | 51176          | brown |
| 210954_s_at | TSC22D2       | 9819           | brown |
| 211018_at   | LSS           | 4047           | brown |
| 211029_x_at | FGF18         | 8817           | brown |
| 211062_s_at | CPZ /// GPR78 | 8532 /// 27201 | brown |
| 211071_s_at | MLLT11        | 10962          | brown |
| 211075_s_at | CD47          | 961            | brown |
| 211113_s_at | ABCG1         | 9619           | brown |
| 211160_x_at | ACTN1         | 87             | brown |
| 211219_s_at | LHX2          | 9355           | brown |
| 211222_s_at | HAP1          | 9001           | brown |
| 211357_s_at | ALDOB         | 229            | brown |
| 211361_s_at | SERPINB13     | 5275           | brown |
| 211362_s_at | SERPINB13     | 5275           | brown |
| 211366_x_at | CASP1         | 834            | brown |
| 211368_s_at | CASP1         | 834            | brown |
| 211376_s_at | NSMCE4A       | 54780          | brown |
| 211404_s_at | APLP2         | 334            | brown |
| 211429_s_at | SERPINA1      | 5265           | brown |
| 211485_s_at | FGF18         | 8817           | brown |
| 211518_s_at | BMP4          | 652            | brown |
| 211520_s_at | GRIA1         | 2890           | brown |
| 211538_s_at | HSPA2         | 3306           | brown |
| 211764_s_at | UBE2D1        | 7321           | brown |
| 211776_s_at | EPB41L3       | 23136          | brown |
| 211793_s_at | ABI2          | 10152          | brown |
| 211828_s_at | TNIK          | 23043          | brown |
| 211844_s_at | NRP2          | 8828           | brown |

|             |               |               |       |
|-------------|---------------|---------------|-------|
| 212098_at   | MGAT5         | 4249          | brown |
| 212144_at   | SUN2          | 25777         | brown |
| 212154_at   | SDC2          | 6383          | brown |
| 212157_at   | SDC2          | 6383          | brown |
| 212236_x_at | JUP /// KRT17 | 3728 /// 3872 | brown |
| 212365_at   | MYO1B         | 4430          | brown |
| 212471_at   | AVL9          | 23080         | brown |
| 212478_at   | RMND5A        | 64795         | brown |
| 212479_s_at | RMND5A        | 64795         | brown |
| 212521_s_at | PDE8A         | 5151          | brown |
| 212531_at   | LCN2          | 3934          | brown |
| 212580_at   | CAST          | 831           | brown |
| 212613_at   | BTN3A2        | 11118         | brown |
| 212623_at   | TMEM41B       | 440026        | brown |
| 212681_at   | EPB41L3       | 23136         | brown |
| 212686_at   | PPM1H         | 57460         | brown |
| 212703_at   | TLN2          | 83660         | brown |
| 212738_at   | ARHGAP19      | 84986         | brown |
| 212807_s_at | SORT1         | 6272          | brown |
| 212816_s_at | CBS           | 875           | brown |
| 212821_at   | PLEKHG3       | 26030         | brown |
| 212822_at   | HEG1          | 57493         | brown |
| 212829_at   | PIP4K2A       | 5305          | brown |
| 212841_s_at | PPFIBP2       | 8495          | brown |
| 212902_at   | SEC24A        | 10802         | brown |
| 212915_at   | PDZRN3        | 23024         | brown |
| 212942_s_at | KIAA1199      | 57214         | brown |
| 213035_at   | ANKRD28       | 23243         | brown |
| 213038_at   | RNF19B        | 127544        | brown |
| 213069_at   | HEG1          | 57493         | brown |
| 213096_at   | TMCC2         | 9911          | brown |
| 213100_at   | UNC5B         | 219699        | brown |
| 213107_at   | TNIK          | 23043         | brown |
| 213122_at   | TSPYL5        | 85453         | brown |
| 213344_s_at | H2AFX         | 3014          | brown |
| 213358_at   | SOGA2         | 23255         | brown |
| 213385_at   | CHN2          | 1124          | brown |
| 213413_at   | STON1         | 11037         | brown |
| 213418_at   | HSPA6         | 3310          | brown |
| 213419_at   | APBB2         | 323           | brown |
| 213423_x_at | TUSC3         | 7991          | brown |
| 213425_at   | WNT5A         | 7474          | brown |
| 213438_at   | NFASC         | 23114         | brown |

|             |         |        |       |
|-------------|---------|--------|-------|
| 213439_x_at | RUNDC3A | 10900  | brown |
| 213489_at   | MAPRE2  | 10982  | brown |
| 213558_at   | PCLO    | 27445  | brown |
| 213631_x_at | DHODH   | 1723   | brown |
| 213638_at   | PHACTR1 | 221692 | brown |
| 213692_s_at | VDR     | 7421   | brown |
| 213711_at   | KRT81   | 3887   | brown |
| 213713_s_at | GLB1L2  | 89944  | brown |
| 213749_at   | MASP1   | 5648   | brown |
| 213759_at   | ARL4C   | 10123  | brown |
| 213774_s_at | PPP1R2  | 5504   | brown |
| 213780_at   | TCHH    | 7062   | brown |
| 213796_at   | SPRR1A  | 6698   | brown |
| 213802_at   | PRSS12  | 8492   | brown |
| 213836_s_at | WIPI1   | 55062  | brown |
| 213844_at   | HOXA5   | 3202   | brown |
| 213849_s_at | PPP2R2B | 5521   | brown |
| 213880_at   | LGR5    | 8549   | brown |
| 213895_at   | EMP1    | 2012   | brown |
| 213899_at   | METAP2  | 10988  | brown |
| 213909_at   | LRRC15  | 131578 | brown |
| 213912_at   | TBC1D30 | 23329  | brown |
| 213913_s_at | TBC1D30 | 23329  | brown |
| 213924_at   | GNAL    | 2774   | brown |
| 213967_at   | RALYL   | 138046 | brown |
| 214000_s_at | RGS10   | 6001   | brown |
| 214012_at   | ERAP1   | 51752  | brown |
| 214036_at   | EFNA5   | 1946   | brown |
| 214068_at   | BEAN1   | 146227 | brown |
| 214104_at   | GPR161  | 23432  | brown |
| 214121_x_at | PDLIM7  | 9260   | brown |
| 214163_at   | HSPB11  | 51668  | brown |
| 214168_s_at | TJP1    | 7082   | brown |
| 214186_s_at | HCG26   | 352961 | brown |
| 214203_s_at | PRODH   | 5625   | brown |
| 214222_at   | DNAH7   | 56171  | brown |
| 214226_at   | PRSS53  | 339105 | brown |
| 214230_at   | CDC42   | 998    | brown |
| 214270_s_at | MAPRE3  | 22924  | brown |
| 214284_s_at | FGF18   | 8817   | brown |
| 214285_at   | FABP3   | 2170   | brown |
| 214321_at   | NOV     | 4856   | brown |
| 214324_at   | GP2     | 2813   | brown |

|             |                             |                            |       |
|-------------|-----------------------------|----------------------------|-------|
| 214417_s_at | FETUB                       | 26998                      | brown |
| 214423_x_at | ALDOB                       | 229                        | brown |
| 214424_s_at | ALDOB                       | 229                        | brown |
| 214433_s_at | SELENBP1                    | 8991                       | brown |
| 214446_at   | ELL2                        | 22936                      | brown |
| 214517_at   | KRTAP5-9                    | 3846                       | brown |
| 214549_x_at | SPRR1A                      | 6698                       | brown |
| 214576_at   | KRT36                       | 8689                       | brown |
| 214580_x_at | KRT6A /// KRT6B /// KRT6C   | 3853 /// 3854 /// 286887   | brown |
| 214587_at   | COL8A1                      | 1295                       | brown |
| 214590_s_at | UBE2D1                      | 7321                       | brown |
| 214632_at   | NRP2                        | 8828                       | brown |
| 214636_at   | CALCB                       | 797                        | brown |
| 214657_s_at | MIR612 /// NEAT1            | 283131 /// 693197          | brown |
| 214755_at   | UAP1L1                      | 91373                      | brown |
| 214858_at   | PP14571                     | 100130449                  | brown |
| 214875_x_at | APLP2                       | 334                        | brown |
| 214887_at   | N4BP2L1                     | 90634                      | brown |
| 214906_x_at | N4BP2L1                     | 90634                      | brown |
| 214939_x_at | MLLT4                       | 4301                       | brown |
| 214956_at   | AAK1                        | 22848                      | brown |
| 214981_at   | POSTN                       | 10631                      | brown |
| 215033_at   | TM4SF1                      | 4071                       | brown |
| 215034_s_at | TM4SF1                      | 4071                       | brown |
| 215150_at   | YOD1                        | 55432                      | brown |
| 215189_at   | KRT86 /// LOC100509764      | 3892 /// 100509764         | brown |
| 215222_x_at | MACF1                       | 23499                      | brown |
| 215253_s_at | RCAN1                       | 1827                       | brown |
| 215271_at   | TNN                         | 63923                      | brown |
| 215274_at   | SLC12A3                     | 6559                       | brown |
| 215302_at   | LOC257152                   | 257152                     | brown |
| 215313_x_at | HLA-A                       | 3105                       | brown |
| 215346_at   | CD40                        | 958                        | brown |
| 215471_s_at | MAP7                        | 9053                       | brown |
| 215547_at   | TSC22D2                     | 9819                       | brown |
|             | HIST1H2BC /// HIST1H2BE /// |                            |       |
|             | HIST1H2BF /// HIST1H2BG /// | 8339 /// 8343 /// 8344 /// |       |
| 215779_s_at | HIST1H2BI /// NCALD         | 8346 /// 8347 /// 83988    | brown |
| 215785_s_at | CYFIP2                      | 26999                      | brown |
| 215817_at   | SERPINB13                   | 5275                       | brown |
| 216086_at   | SV2C                        | 22987                      | brown |
| 216092_s_at | SLC7A8                      | 23428                      | brown |
| 216235_s_at | EDNRA                       | 1909                       | brown |

|             |                     |                 |       |
|-------------|---------------------|-----------------|-------|
| 216258_s_at | SERPINB13           | 5275            | brown |
| 216504_s_at | SLC39A8             | 64116           | brown |
| 216595_at   | FAM186A             | 121006          | brown |
| 216600_x_at | ALDOB               | 229             | brown |
| 216604_s_at | SLC7A8              | 23428           | brown |
| 216622_at   | LAMB4               | 22798           | brown |
| 216810_at   | KRTAP4-7            | 100132476       | brown |
| 216921_s_at | KRT35               | 3886            | brown |
| 217025_s_at | DBN1                | 1627            | brown |
| 217031_at   | KRT84               | 3890            | brown |
| 217185_s_at | ZNF259 /// ZNF259P1 | 8882 /// 442240 | brown |
| 217197_x_at | N4BP2L1             | 90634           | brown |
| 217238_s_at | ALDOB               | 229             | brown |
| 217272_s_at | SERPINB13           | 5275            | brown |
| 217395_at   | MT4                 | 84560           | brown |
| 217428_s_at | COL10A1             | 1300            | brown |
| 217557_s_at | CPM                 | 1368            | brown |
| 217678_at   | SLC7A11             | 23657           | brown |
| 217738_at   | NAMPT               | 10135           | brown |
| 217739_s_at | NAMPT               | 10135           | brown |
| 217771_at   | GOLM1               | 51280           | brown |
| 217787_s_at | GALNT2              | 2590            | brown |
| 217799_x_at | UBE2H               | 7328            | brown |
| 217875_s_at | PMEP A1             | 56937           | brown |
| 217897_at   | FX YD6              | 53826           | brown |
| 217905_at   | MCMBP               | 79892           | brown |
| 217921_at   | MAN1A2              | 10905           | brown |
| 217924_at   | C6orf106            | 64771           | brown |
| 217933_s_at | LAP3                | 51056           | brown |
| 218032_at   | SNN                 | 8303            | brown |
| 218051_s_at | NT5DC2              | 64943           | brown |
| 218113_at   | TMEM2               | 23670           | brown |
| 218168_s_at | ADCK3               | 56997           | brown |
| 218257_s_at | UGGT1               | 56886           | brown |
| 218266_s_at | NCS1                | 23413           | brown |
| 218326_s_at | LGR4                | 55366           | brown |
| 218368_s_at | TNFRSF12A           | 51330           | brown |
| 218384_at   | CARHSP1             | 23589           | brown |
| 218433_at   | PANK3               | 79646           | brown |
| 218458_at   | GMCL1               | 64395           | brown |
| 218487_at   | ALAD                | 210             | brown |
| 218489_s_at | ALAD                | 210             | brown |
| 218502_s_at | TRPS1               | 7227            | brown |

|             |                  |                 |       |
|-------------|------------------|-----------------|-------|
| 218543_s_at | PARP12           | 64761           | brown |
| 218574_s_at | LMCD1            | 29995           | brown |
| 218610_s_at | CPPED1           | 55313           | brown |
| 218627_at   | DRAM1            | 55332           | brown |
| 218717_s_at | LEPREL1          | 55214           | brown |
| 218736_s_at | PALMD            | 54873           | brown |
| 218813_s_at | SH3GLB2          | 56904           | brown |
| 218834_s_at | TMEM132A         | 54972           | brown |
| 218851_s_at | SFT2D3 /// WDR33 | 55339 /// 84826 | brown |
| 218854_at   | DSE              | 29940           | brown |
| 218876_at   | TPPP3            | 51673           | brown |
| 218888_s_at | NETO2            | 81831           | brown |
| 218929_at   | CDKN2AIP         | 55602           | brown |
| 218935_at   | EHD3             | 30845           | brown |
| 218980_at   | FHOD3            | 80206           | brown |
| 219018_s_at | CCDC85C          | 317762          | brown |
| 219033_at   | PARP8            | 79668           | brown |
| 219054_at   | NPR3             | 4883            | brown |
| 219090_at   | SLC24A3          | 57419           | brown |
| 219132_at   | PELI2            | 57161           | brown |
| 219142_at   | RASL11B          | 65997           | brown |
| 219225_at   | PGBD5            | 79605           | brown |
| 219229_at   | SLCO3A1          | 28232           | brown |
| 219232_s_at | EGLN3            | 112399          | brown |
| 219234_x_at | SCRN3            | 79634           | brown |
| 219250_s_at | FLRT3            | 23767           | brown |
| 219270_at   | CHAC1            | 79094           | brown |
| 219271_at   | GALNT14          | 79623           | brown |
| 219300_s_at | CNTNAP2          | 26047           | brown |
| 219301_s_at | CNTNAP2          | 26047           | brown |
| 219330_at   | VANGL1           | 81839           | brown |
| 219340_s_at | CLN8             | 2055            | brown |
| 219344_at   | SLC29A3          | 55315           | brown |
| 219349_s_at | EXOC2            | 55770           | brown |
| 219367_s_at | NRP2             | 8828            | brown |
| 219369_s_at | OTUB2            | 78990           | brown |
| 219383_at   | PRR5L            | 79899           | brown |
| 219463_at   | LAMP5            | 24141           | brown |
| 219511_s_at | SNCAIP           | 9627            | brown |
| 219521_at   | B3GAT1           | 27087           | brown |
| 219554_at   | RHCG             | 51458           | brown |
| 219610_at   | ARHGEF28         | 64283           | brown |
| 219612_s_at | FGG              | 2266            | brown |

|             |                           |                     |       |
|-------------|---------------------------|---------------------|-------|
| 219648_at   | MREG                      | 55686               | brown |
| 219659_at   | ATP8A2                    | 51761               | brown |
| 219660_s_at | ATP8A2                    | 51761               | brown |
| 219671_at   | HPCAL4                    | 51440               | brown |
| 219683_at   | FZD3                      | 7976                | brown |
| 219687_at   | HHAT                      | 55733               | brown |
| 219688_at   | BBS7                      | 55212               | brown |
| 219691_at   | SAMD9                     | 54809               | brown |
| 219697_at   | HS3ST2                    | 9956                | brown |
| 219750_at   | TMEM144                   | 55314               | brown |
| 219768_at   | VTCN1                     | 79679               | brown |
| 219775_s_at | CPLX3                     | 594855              | brown |
| 219806_s_at | SMCO4                     | 56935               | brown |
| 219828_at   | RABL6                     | 55684               | brown |
| 219832_s_at | HOXC13                    | 3229                | brown |
| 219842_at   | ARL15                     | 54622               | brown |
| 219869_s_at | SLC39A8                   | 64116               | brown |
| 219870_at   | ATF7IP2                   | 80063               | brown |
| 219916_s_at | RNF39                     | 80352               | brown |
| 219926_at   | POPDC3                    | 64208               | brown |
| 219932_at   | SLC27A6                   | 28965               | brown |
| 219946_x_at | MYH14                     | 79784               | brown |
| 219987_at   | ERVMER34-1                | 100288413           | brown |
| 219991_at   | SLC2A9                    | 56606               | brown |
| 220011_at   | AUNIP                     | 79000               | brown |
| 220021_at   | TMC7                      | 79905               | brown |
| 220090_at   | CRNN                      | 49860               | brown |
| 220129_at   | CCDC169-SOHLH2 /// SOHLH2 | 54937 /// 100526761 | brown |
| 220203_at   | BMP8A                     | 353500              | brown |
| 220244_at   | LINC00312                 | 29931               | brown |
| 220245_at   | SLC45A2                   | 51151               | brown |
| 220256_s_at | OXCT2                     | 64064               | brown |
| 220272_at   | BNC2                      | 54796               | brown |
| 220317_at   | LRAT                      | 9227                | brown |
| 220351_at   | CCRL1                     | 51554               | brown |
| 220406_at   | TGFB2                     | 7042                | brown |
| 220407_s_at | TGFB2                     | 7042                | brown |
| 220431_at   | TMPRSS11E                 | 28983               | brown |
| 220456_at   | SPTLC3                    | 55304               | brown |
| 220489_s_at | SERINC2                   | 347735              | brown |
| 220624_s_at | ELF5                      | 2001                | brown |
| 220635_at   | PSORS1C2                  | 170680              | brown |
| 220641_at   | NOX5                      | 79400               | brown |

|             |                       |                  |       |
|-------------|-----------------------|------------------|-------|
| 220724_at   | CWH43                 | 80157            | brown |
| 220753_s_at | CRYL1                 | 51084            | brown |
| 220768_s_at | CSNK1G3               | 1456             | brown |
| 220779_at   | PADI3                 | 51702            | brown |
| 220780_at   | PLA2G3                | 50487            | brown |
| 220782_x_at | KLK12                 | 43849            | brown |
| 220800_s_at | TMOD3                 | 29766            | brown |
| 220840_s_at | C1orf112              | 55732            | brown |
| 220962_s_at | PADI1                 | 29943            | brown |
| 220970_s_at | KRTAP2-3 /// KRTAP2-4 | 85294 /// 730755 | brown |
| 220972_s_at | KRTAP9-9              | 81870            | brown |
| 220976_s_at | KRTAP1-1              | 81851            | brown |
| 220978_at   | KRTAP1-3              | 81850            | brown |
| 220984_s_at | SLCO5A1               | 81796            | brown |
| 220999_s_at | CYFIP2                | 26999            | brown |
| 221102_s_at | TRPM6                 | 140803           | brown |
| 221114_at   | AMBN                  | 258              | brown |
| 221222_s_at | C1orf56               | 54964            | brown |
| 221234_s_at | BACH2                 | 60468            | brown |
| 221245_s_at | FZD5                  | 7855             | brown |
| 221266_s_at | DCSTAMP               | 81501            | brown |
| 221272_s_at | C1orf21               | 81563            | brown |
| 221292_at   | PTCH2                 | 8643             | brown |
| 221297_at   | GPRC5D                | 55507            | brown |
| 221389_at   | PLA2G2E               | 30814            | brown |
| 221416_at   | PLA2G2F               | 64600            | brown |
| 221425_s_at | ISCA1                 | 81689            | brown |
| 221455_s_at | WNT3                  | 7473             | brown |
| 221497_x_at | EGLN1                 | 54583            | brown |
| 221515_s_at | LCMT1                 | 51451            | brown |
| 221524_s_at | RRAGD                 | 58528            | brown |
| 221539_at   | EIF4EBP1              | 1978             | brown |
| 221558_s_at | LEF1                  | 51176            | brown |
| 221627_at   | TRIM10                | 10107            | brown |
| 221648_s_at | AGMAT                 | 79814            | brown |
| 221716_s_at | ACSBG2                | 81616            | brown |
| 221803_s_at | NRBF2                 | 29982            | brown |
| 221816_s_at | PHF11                 | 51131            | brown |
| 221898_at   | PDPN                  | 10630            | brown |
| 221962_s_at | UBE2H                 | 7328             | brown |
| 221978_at   | HLA-F                 | 3134             | brown |
| 222007_s_at | FKBP8                 | 23770            | brown |
| 222015_at   | CSNK1E                | 1454             | brown |



|             |                        |                     |       |
|-------------|------------------------|---------------------|-------|
| 222067_x_at | HIST1H2BD              | 3017                | brown |
| 222075_s_at | OAZ3                   | 51686               | brown |
| 222162_s_at | ADAMTS1                | 9510                | brown |
| 222164_at   | FGFR1                  | 2260                | brown |
| 222351_at   | PPP2R1B                | 5519                | brown |
| 222386_s_at | COPZ1                  | 22818               | brown |
| 222420_s_at | UBE2H                  | 7328                | brown |
| 222429_at   | DBNL                   | 28988               | brown |
| 222486_s_at | ADAMTS1                | 9510                | brown |
| 222537_s_at | CDC42SE1               | 56882               | brown |
| 222581_at   | XPR1                   | 9213                | brown |
| 222598_s_at | NAV2                   | 89797               | brown |
| 222651_s_at | TRPS1                  | 7227                | brown |
| 222653_at   | PNPO                   | 55163               | brown |
| 222701_s_at | CHCHD7                 | 79145               | brown |
| 222702_x_at | CRIPT                  | 9419                | brown |
| 222706_at   | CWC25                  | 54883               | brown |
| 222774_s_at | NETO2                  | 81831               | brown |
| 222783_s_at | SMOC1                  | 64093               | brown |
| 222784_at   | SMOC1                  | 64093               | brown |
| 222799_at   | WDR91                  | 29062               | brown |
| 222833_at   | LPCAT2                 | 54947               | brown |
| 222853_at   | FLRT3                  | 23767               | brown |
| 222871_at   | KLHDC8A                | 55220               | brown |
| 222874_s_at | CLN8                   | 2055                | brown |
| 222878_s_at | OTUB2                  | 78990               | brown |
| 222890_at   | CCDC113                | 29070               | brown |
| 222927_s_at | CPLX3                  | 594855              | brown |
| 222942_s_at | LOC100505519 /// TIAM2 | 26230 /// 100505519 | brown |
| 223044_at   | SLC40A1                | 30061               | brown |
| 223078_s_at | TMOD3                  | 29766               | brown |
| 223126_s_at | C1orf21                | 81563               | brown |
| 223145_s_at | AKIRIN2                | 55122               | brown |
| 223220_s_at | PARP9                  | 83666               | brown |
| 223278_at   | GJB2                   | 2706                | brown |
| 223281_s_at | COX15                  | 1355                | brown |
| 223349_s_at | BOK                    | 666                 | brown |
| 223362_s_at |                        | 3-Sep 55964         | brown |
| 223395_at   | ABI3BP                 | 25890               | brown |
| 223427_s_at | EPB41L4B               | 54566               | brown |
| 223461_at   | TBC1D7                 | 51256               | brown |
| 223468_s_at | RGMA                   | 56963               | brown |
| 223471_at   | RAB3IP                 | 117177              | brown |

|             |                   |                 |       |
|-------------|-------------------|-----------------|-------|
| 223498_at   | SPECC1            | 92521           | brown |
| 223503_at   | TMEM163           | 81615           | brown |
| 223538_at   | SERF1A /// SERF1B | 8293 /// 728492 | brown |
| 223539_s_at | SERF1A /// SERF1B | 8293 /// 728492 | brown |
| 223548_at   | SWT1              | 54823           | brown |
| 223593_at   | AADAT             | 51166           | brown |
| 223599_at   | TRIM6             | 117854          | brown |
| 223650_s_at | NRBF2             | 29982           | brown |
| 223682_s_at | EIF1AD            | 84285           | brown |
| 223690_at   | LTBP2             | 4053            | brown |
| 223720_at   | SPINK7            | 84651           | brown |
| 223739_at   | PADI1             | 29943           | brown |
| 223775_at   | HHIP              | 64399           | brown |
| 223786_at   | CHST6             | 4166            | brown |
| 223805_at   | OSBPL6            | 114880          | brown |
| 223812_at   | FAM178B           | 51252           | brown |
| 223821_s_at | SUSD4             | 55061           | brown |
| 223822_at   | SUSD4             | 55061           | brown |
| 223824_at   | RNLS              | 55328           | brown |
| 223912_s_at | CLN8              | 2055            | brown |
| 223987_at   | CHRDL2            | 25884           | brown |
| 223991_s_at | GALNT2            | 2590            | brown |
| 224022_x_at | WNT16             | 51384           | brown |
| 224218_s_at | TRPS1             | 7227            | brown |
| 224225_s_at | ETV7              | 51513           | brown |
| 224262_at   | IL1F10            | 84639           | brown |
| 224269_at   | KRTAP4-12         | 83755           | brown |
| 224277_at   | MOP-1             | 643616          | brown |
| 224325_at   | FZD8              | 8325            | brown |
| 224397_s_at | TMTC1             | 83857           | brown |
| 224412_s_at | TRPM6             | 140803          | brown |
| 224520_s_at | BEST3             | 144453          | brown |
| 224593_at   | ZNF664            | 144348          | brown |
| 224674_at   | TTYH3             | 80727           | brown |
| 224701_at   | PARP14            | 54625           | brown |
| 224724_at   | SULF2             | 55959           | brown |
| 224762_at   | SERINC2           | 347735          | brown |
| 224836_at   | TP53INP2          | 58476           | brown |
| 224840_at   | FKBP5             | 2289            | brown |
| 224856_at   | FKBP5             | 2289            | brown |
| 224901_at   | SCD5              | 79966           | brown |
| 224940_s_at | PAPPA             | 5069            | brown |
| 224941_at   | PAPPA             | 5069            | brown |

|             |                        |                     |       |
|-------------|------------------------|---------------------|-------|
| 224950_at   | PTGFRN                 | 5738                | brown |
| 225076_s_at | ZNFX1                  | 57169               | brown |
| 225105_at   | C12orf75               | 387882              | brown |
| 225119_at   | CHMP4B                 | 128866              | brown |
| 225142_at   | JHDM1D                 | 80853               | brown |
| 225258_at   | FBLIM1                 | 54751               | brown |
| 225282_at   | SMAP2                  | 64744               | brown |
| 225295_at   | SLC39A10               | 57181               | brown |
| 225390_s_at | KLF13                  | 51621               | brown |
| 225491_at   | SLC1A2                 | 6506                | brown |
| 225496_s_at | SYTL2                  | 54843               | brown |
| 225545_at   | EEF2K /// LOC101060570 | 29904 /// 101060570 | brown |
| 225597_at   | SLC45A4                | 57210               | brown |
| 225659_at   | SPOPL                  | 339745              | brown |
| 225660_at   | SEMA6A                 | 57556               | brown |
| 225685_at   | CDC42EP3               | 10602               | brown |
| 225686_at   | SKA2                   | 348235              | brown |
| 225723_at   | CCDC167                | 154467              | brown |
| 225766_s_at | TNPO1                  | 3842                | brown |
| 225803_at   | FBXO32                 | 114907              | brown |
| 225809_at   | PARM1                  | 25849               | brown |
| 225904_at   | CCSAP                  | 126731              | brown |
| 225935_at   | CUX1                   | 1523                | brown |
| 225950_at   | SAMD8                  | 142891              | brown |
| 225985_at   | PRKAA1                 | 5562                | brown |
| 226003_at   | KIF21A                 | 55605               | brown |
| 226009_at   | DPCD                   | 25911               | brown |
| 226026_at   | DIRC2                  | 84925               | brown |
| 226030_at   | ACADSB                 | 36                  | brown |
| 226056_at   | ARHGAP31               | 57514               | brown |
| 226065_at   | PRICKLE1               | 144165              | brown |
| 226069_at   | PRICKLE1               | 144165              | brown |
| 226122_at   | PLEKHG1                | 57480               | brown |
| 226187_at   | CDS1                   | 1040                | brown |
| 226287_at   | CCDC34                 | 91057               | brown |
| 226313_at   | C10orf35               | 219738              | brown |
| 226380_at   | PTPN21                 | 11099               | brown |
| 226390_at   | STARD4                 | 134429              | brown |
| 226416_at   | ERI1                   | 90459               | brown |
| 226474_at   | NLRC5                  | 84166               | brown |
| 226499_at   | NRARP                  | 441478              | brown |
| 226535_at   | ITGB6                  | 3694                | brown |
| 226541_at   | FBXO30                 | 84085               | brown |

|             |                         |                    |       |
|-------------|-------------------------|--------------------|-------|
| 226590_at   | ZNF618                  | 114991             | brown |
| 226592_at   | ZNF618                  | 114991             | brown |
| 226599_at   | FHDC1                   | 85462              | brown |
| 226609_at   | DCBLD1                  | 285761             | brown |
| 226613_at   | GATSL3                  | 652968             | brown |
| 226623_at   | PHYHIPL                 | 84457              | brown |
| 226637_at   | UBE2H                   | 7328               | brown |
| 226656_at   | CRTAP                   | 10491              | brown |
| 226657_at   | C17orf103               | 256302             | brown |
| 226681_at   | UBE2H                   | 7328               | brown |
| 226698_at   | FCHSD1                  | 89848              | brown |
| 226706_at   | FLJ23867 /// QSOX1      | 5768 /// 200058    | brown |
| 226778_at   | TDRP                    | 157695             | brown |
| 226817_at   | DSC2                    | 1824               | brown |
| 226824_at   | CPXM2                   | 119587             | brown |
| 226829_at   | AFAP1L2                 | 84632              | brown |
| 226858_at   | CSNK1E /// LOC100996460 | 1454 /// 100996460 | brown |
| 226884_at   | LRRN1                   | 57633              | brown |
| 226887_at   | HSPA14                  | 51182              | brown |
| 226899_at   | UNC5B                   | 219699             | brown |
| 226905_at   | FAM101B                 | 359845             | brown |
| 226949_at   | GOLGA3                  | 2802               | brown |
| 226952_at   | EAF1                    | 85403              | brown |
| 226988_s_at | MYH14                   | 79784              | brown |
| 227032_at   | PLXNA2                  | 5362               | brown |
| 227080_at   | ZNF697                  | 90874              | brown |
| 227091_at   | CCDC146                 | 57639              | brown |
| 227138_at   | CRTAP                   | 10491              | brown |
| 227173_s_at | BACH2                   | 60468              | brown |
| 227283_at   | EFR3B                   | 22979              | brown |
| 227300_at   | TMEM119                 | 338773             | brown |
| 227313_at   | CNPY4                   | 245812             | brown |
| 227317_at   | LMCD1                   | 29995              | brown |
| 227405_s_at | FZD8                    | 8325               | brown |
| 227410_at   | FAM43A                  | 131583             | brown |
| 227439_at   | ANKS1B                  | 56899              | brown |
| 227443_at   | LURAP1L                 | 286343             | brown |
| 227461_at   | STON2                   | 85439              | brown |
| 227468_at   | CPT1C                   | 126129             | brown |
| 227481_at   | CNKSR3                  | 154043             | brown |
| 227491_at   | ELOVL6                  | 79071              | brown |
| 227499_at   | FZD3                    | 7976               | brown |
| 227506_at   | SLC16A9                 | 220963             | brown |

|             |           |        |       |
|-------------|-----------|--------|-------|
| 227524_at   | FZD3      | 7976   | brown |
| 227526_at   | CDON      | 50937  | brown |
| 227596_at   | FLJ37453  | 729614 | brown |
| 227606_s_at | STAMBPL1  | 57559  | brown |
| 227650_at   | HSPA14    | 51182  | brown |
| 227723_at   | LOH12CR1  | 118426 | brown |
| 227763_at   | LYPD6     | 130574 | brown |
| 227764_at   | LYPD6     | 130574 | brown |
| 227801_at   | TRIM59    | 286827 | brown |
| 227807_at   | PARP9     | 83666  | brown |
| 227828_s_at | EVA1A     | 84141  | brown |
| 227889_at   | LPCAT2    | 54947  | brown |
| 227936_at   | TMEM68    | 137695 | brown |
| 227942_s_at | CRIPT     | 9419   | brown |
| 227944_at   | PTPN3     | 5774   | brown |
| 227950_at   | UBE2H     | 7328   | brown |
| 227955_s_at | EFNA5     | 1946   | brown |
| 227993_at   | METAP2    | 10988  | brown |
| 228068_at   | GOLGA7B   | 401647 | brown |
| 228080_at   | LAYN      | 143903 | brown |
| 228090_at   | NMNAT3    | 349565 | brown |
| 228121_at   | TGFB2     | 7042   | brown |
| 228126_x_at | CTXN1     | 404217 | brown |
| 228128_x_at | PAPPA     | 5069   | brown |
| 228132_at   | ABLIM2    | 84448  | brown |
| 228181_at   | SLC30A1   | 7779   | brown |
| 228260_at   | ELAVL2    | 1993   | brown |
| 228284_at   | TLE1      | 7088   | brown |
| 228293_at   | DEPDC7    | 91614  | brown |
| 228305_at   | ZNF565    | 147929 | brown |
| 228306_at   | CNIH4     | 29097  | brown |
| 228307_at   | EMILIN3   | 90187  | brown |
| 228314_at   | LRRRC8C   | 84230  | brown |
| 228329_at   | DAB1      | 1600   | brown |
| 228360_at   | LYPD6B    | 130576 | brown |
| 228404_at   | IRX2      | 153572 | brown |
| 228412_at   | LOC643072 | 643072 | brown |
| 228485_s_at | SLC44A1   | 23446  | brown |
| 228486_at   | SLC44A1   | 23446  | brown |
| 228490_at   | ABHD2     | 11057  | brown |
| 228531_at   | SAMD9     | 54809  | brown |
| 228555_at   | CAMK2D    | 817    | brown |
| 228587_at   | FAM83G    | 644815 | brown |

|             |                     |                 |       |
|-------------|---------------------|-----------------|-------|
| 228636_at   | BHLHE22             | 27319           | brown |
| 228646_at   | PPP1R1C             | 151242          | brown |
| 228653_at   | SAMD5               | 389432          | brown |
| 228697_at   | HINT3               | 135114          | brown |
| 228703_at   | P4HA3               | 283208          | brown |
| 228705_at   | CAPN12              | 147968          | brown |
| 228720_at   | SORCS2              | 57537           | brown |
| 228780_at   | POU3F3              | 5455            | brown |
| 228786_at   | PTCHD3P1            | 387647          | brown |
| 228832_at   | FLJ20021            | 90024           | brown |
| 228837_at   | TCF4                | 6925            | brown |
| 228846_at   | MXD1                | 4084            | brown |
| 228882_at   | TUB                 | 7275            | brown |
| 228885_at   | MAMDC2              | 256691          | brown |
| 228894_at   | LOC253842 /// NR6A1 | 2649 /// 253842 | brown |
| 228900_at   | SPECC1              | 92521           | brown |
| 228910_at   | CD82                | 3732            | brown |
| 228915_at   | DACH1               | 1602            | brown |
| 228922_at   | SHF                 | 90525           | brown |
| 228945_s_at | SLC39A8             | 64116           | brown |
| 228975_at   | SP6                 | 80320           | brown |
| 228977_at   | LOC729680           | 729680          | brown |
| 228996_at   | RC3H1               | 149041          | brown |
| 229004_at   | ADAMTS15            | 170689          | brown |
| 229030_at   | CAPN8               | 388743          | brown |
| 229055_at   | GPR68               | 8111            | brown |
| 229065_at   | SLC35F3             | 148641          | brown |
| 229084_at   | CNTN4               | 152330          | brown |
| 229093_at   | NOS3                | 4846            | brown |
| 229097_at   | DIAPH3              | 81624           | brown |
| 229110_at   | SLC24A2             | 25769           | brown |
| 229158_at   | WNK4                | 65266           | brown |
| 229168_at   | COL23A1             | 91522           | brown |
| 229213_at   | DIRC2               | 84925           | brown |
| 229228_at   | CREB5 /// LOC401317 | 9586 /// 401317 | brown |
| 229252_at   | ATG9B               | 285973          | brown |
| 229275_at   | IGFN1               | 91156           | brown |
| 229280_s_at | LINC00340           | 401237          | brown |
| 229290_at   | DAPL1               | 92196           | brown |
| 229337_at   | USP2                | 9099            | brown |
| 229378_at   | STOX1               | 219736          | brown |
| 229427_at   | SEMA5A              | 9037            | brown |
| 229442_at   | C18orf54            | 162681          | brown |

|             |              |           |       |
|-------------|--------------|-----------|-------|
| 229474_at   | MICAL3       | 57553     | brown |
| 229518_at   | FAM46B       | 115572    | brown |
| 229581_at   | ELFN1        | 392617    | brown |
| 229610_at   | CKAP2L       | 150468    | brown |
| 229641_at   | CCBE1        | 147372    | brown |
| 229682_at   | MAPRE3       | 22924     | brown |
| 229718_at   | N4BP2L1      | 90634     | brown |
| 229720_at   | BAG1         | 573       | brown |
| 229730_at   | SMTNL2       | 342527    | brown |
| 229734_at   | MIR4697HG    | 283174    | brown |
| 229738_at   | DNAH10       | 196385    | brown |
| 229776_at   | SLCO3A1      | 28232     | brown |
| 229817_at   | ZNF608       | 57507     | brown |
| 229823_at   | RIMS2        | 9699      | brown |
| 229900_at   | CD109        | 135228    | brown |
| 229901_at   | ZNF488       | 118738    | brown |
| 229909_at   | B4GALNT3     | 283358    | brown |
| 229929_at   | SPSB4        | 92369     | brown |
| 229933_at   | C1orf74      | 148304    | brown |
| 229942_at   | BNC2         | 54796     | brown |
| 230021_at   | TICRR        | 90381     | brown |
| 230051_at   | PROSER2      | 254427    | brown |
| 230068_s_at | PEG3-AS1     | 100169890 | brown |
| 230104_s_at | TPPP         | 11076     | brown |
| 230135_at   | HHIP         | 64399     | brown |
| 230138_at   | NCS1         | 23413     | brown |
| 230150_at   | BCAP29       | 55973     | brown |
| 230184_at   | LOC100506421 | 100506421 | brown |
| 230195_at   | LOC100131138 | 100131138 | brown |
| 230197_s_at | TPPP         | 11076     | brown |
| 230201_at   | FXR1         | 8087      | brown |
| 230254_at   | FAM26E       | 254228    | brown |
| 230276_at   | FAM49A       | 81553     | brown |
| 230280_at   | TRIM9        | 114088    | brown |
| 230369_at   | GPR161       | 23432     | brown |
| 230430_at   | ENTPD2       | 954       | brown |
| 230441_at   | PLEKHG4B     | 153478    | brown |
| 230467_at   | TMEM52       | 339456    | brown |
| 230469_at   | RTKN2        | 219790    | brown |
| 230493_at   | SHISA2       | 387914    | brown |
| 230498_at   | MCHR1        | 2847      | brown |
| 230526_at   | TNRC6C-AS1   | 100131096 | brown |
| 230560_at   | STXBP6       | 29091     | brown |

|             |          |           |       |
|-------------|----------|-----------|-------|
| 230622_at   | MLLT4    | 4301      | brown |
| 230673_at   | PKHD1L1  | 93035     | brown |
| 230708_at   | PRICKLE1 | 144165    | brown |
| 230720_at   | RNF182   | 221687    | brown |
| 230722_at   | BNC2     | 54796     | brown |
| 230740_at   | EHD3     | 30845     | brown |
| 230788_at   | GCNT2    | 2651      | brown |
| 230830_at   | SLC51B   | 123264    | brown |
| 231192_at   | LPAR3    | 23566     | brown |
| 231230_at   | KCNK10   | 54207     | brown |
| 231325_at   | UNC5D    | 137970    | brown |
| 231382_at   | FGF18    | 8817      | brown |
| 231395_at   | ATP8A2   | 51761     | brown |
| 231439_at   | FAM84A   | 151354    | brown |
| 231461_at   | KRT71    | 112802    | brown |
| 231565_at   | C4orf22  | 255119    | brown |
| 231583_at   | KRT74    | 121391    | brown |
| 231609_at   | C10orf82 | 143379    | brown |
| 231669_at   | SEPP1    | 6414      | brown |
| 231733_at   | CARD18   | 59082     | brown |
| 231743_at   | WNT3     | 7473      | brown |
| 231771_at   | GJB6     | 10804     | brown |
| 231778_at   | DLX3     | 1747      | brown |
| 231844_at   | MGC27345 | 157247    | brown |
| 231867_at   | TENM2    | 57451     | brown |
| 231875_at   | KIF21A   | 55605     | brown |
| 231935_at   | ARPP21   | 10777     | brown |
| 232009_at   | EMR2     | 30817     | brown |
| 232026_at   | HERC4    | 26091     | brown |
| 232027_at   | SYNE1    | 23345     | brown |
| 232069_at   | KIF26A   | 26153     | brown |
| 232105_at   | BLACAT1  | 101669762 | brown |
| 232232_s_at | SLC22A16 | 85413     | brown |
| 232233_at   | SLC22A16 | 85413     | brown |
| 232253_at   | C5orf56  | 441108    | brown |
| 232303_at   | ZNF608   | 57507     | brown |
| 232311_at   | B2M      | 567       | brown |
| 232322_x_at | STARD10  | 10809     | brown |
| 232348_at   | C18orf8  | 29919     | brown |
| 232378_at   | SLC5A9   | 200010    | brown |
| 232408_at   | ZFYVE28  | 57732     | brown |
| 232547_at   | SRCIN1   | 80725     | brown |
| 232555_at   | CREB5    | 9586      | brown |



|             |                           |                     |       |
|-------------|---------------------------|---------------------|-------|
| 232568_at   | MGC24103                  | 158295              | brown |
| 232596_at   | DIAPH3                    | 81624               | brown |
| 232662_x_at | FAM213A                   | 84293               | brown |
| 232682_at   | MREG                      | 55686               | brown |
| 232717_at   | KALRN                     | 8997                | brown |
| 232720_at   | LINGO2                    | 158038              | brown |
| 232887_at   | PIRT                      | 644139              | brown |
| 232914_s_at | SYTL2                     | 54843               | brown |
| 232977_x_at | MYH14                     | 79784               | brown |
| 233029_at   | OBSCN                     | 84033               | brown |
| 233111_at   | PTCSC1                    | 100302522           | brown |
| 233123_at   | SLC40A1                   | 30061               | brown |
| 233158_at   | KRT82                     | 3888                | brown |
| 233203_at   | ROPN1                     | 54763               | brown |
| 233301_at   | OXCT2                     | 64064               | brown |
| 233340_at   | SPINK13                   | 153218              | brown |
| 233410_at   | CYP1B1-AS1                | 285154              | brown |
| 233520_s_at | CMYA5                     | 202333              | brown |
| 233533_at   | KRTAP1-5                  | 83895               | brown |
| 233534_at   | KRTAP3-2                  | 83897               | brown |
| 233537_at   | KRTAP3-1                  | 83896               | brown |
| 233555_s_at | SULF2                     | 55959               | brown |
| 233564_s_at | CDADC1                    | 81602               | brown |
| 233586_s_at | KLK12                     | 43849               | brown |
| 233587_s_at | SIPA1L2                   | 57568               | brown |
|             | KRTAP9-2 /// KRTAP9-8 /// | 83899 /// 83901 /// |       |
| 233631_x_at | LOC100996762              | 100996762           | brown |
| 233640_x_at | KRTAP9-4                  | 85280               | brown |
| 233681_at   | KRTAP3-3                  | 85293               | brown |
| 233814_at   | EFNA5                     | 1946                | brown |
| 234290_x_at | MYH14                     | 79784               | brown |
| 234316_x_at | KLK12                     | 43849               | brown |
| 234335_s_at | FAM84A                    | 151354              | brown |
| 234351_x_at | TRPS1                     | 7227                | brown |
| 234488_s_at | GMCL1 /// GMCL1P1         | 64395 /// 64396     | brown |
| 234631_at   | KRTAP4-8                  | 728224              | brown |
| 234633_at   | KRTAP4-11                 | 653240              | brown |
| 234635_at   | KRTAP4-1                  | 85285               | brown |
| 234637_at   | KRTAP4-5                  | 85289               | brown |
| 234639_x_at | KRTAP9-8                  | 83901               | brown |
| 234671_at   | KRTAP4-2                  | 85291               | brown |

|             |                            |                      |       |
|-------------|----------------------------|----------------------|-------|
| 234678_at   | KRTAP4-3                   | 85290                | brown |
| 234679_at   | KRTAP9-3                   | 83900                | brown |
| 234680_at   | KRTAP17-1                  | 83902                | brown |
|             | KRTAP4-11 /// KRTAP4-6 /// | 81871 /// 653240 /// |       |
| 234683_at   | LOC100134267               | 100134267            | brown |
| 234684_s_at | KRTAP4-4                   | 84616                | brown |
| 234685_x_at | KRTAP4-9                   | 100132386            | brown |
| 234691_at   | KRTAP2-1                   | 81872                | brown |
| 234772_s_at | KRTAP2-1 /// KRTAP2-2      | 81872 /// 728279     | brown |
| 234880_x_at | KRTAP1-3                   | 81850                | brown |
| 234925_at   | LINC00917                  | 732275               | brown |
| 234986_at   | GCLM                       | 2730                 | brown |
| 234987_at   | SAMHD1                     | 25939                | brown |
| 235012_at   | LRCH1                      | 23143                | brown |
| 235020_at   | TAF4B                      | 6875                 | brown |
| 235022_at   | FAM210A                    | 125228               | brown |
| 235068_at   | ZDHHC21                    | 340481               | brown |
| 235088_at   | C4orf46                    | 201725               | brown |
| 235095_at   | CCDC64B                    | 146439               | brown |
| 235107_at   | PIAS2                      | 9063                 | brown |
| 235144_at   | RASEF                      | 158158               | brown |
| 235224_s_at | CAND1                      | 55832                | brown |
| 235225_at   | SCN2B                      | 6327                 | brown |
| 235256_s_at | GALM                       | 130589               | brown |
| 235275_at   | BMP8B                      | 656                  | brown |
| 235276_at   | EPSTI1                     | 94240                | brown |
| 235310_at   | GCSAM                      | 257144               | brown |
| 235315_at   | TSC22D1                    | 8848                 | brown |
| 235367_at   | MYPN                       | 84665                | brown |
| 235479_at   | CPEB2                      | 132864               | brown |
| 235516_at   | SEPSECS                    | 51091                | brown |
| 235591_at   | SSTR1                      | 6751                 | brown |
| 235672_at   | MAP6                       | 4135                 | brown |
| 235683_at   | SESN3                      | 143686               | brown |
| 235684_s_at | SESN3                      | 143686               | brown |
| 235703_at   | PLB1                       | 151056               | brown |
| 235723_at   | BNC2                       | 54796                | brown |
| 235737_at   | TSLP                       | 85480                | brown |
| 235871_at   | LIPH                       | 200879               | brown |
| 236001_at   | LINC00675                  | 100289255            | brown |

|             |                     |                      |       |
|-------------|---------------------|----------------------|-------|
| 236013_at   | CACNA1E             | 777                  | brown |
| 236255_at   | PLEKHG4B            | 153478               | brown |
| 236261_at   | OSBPL6              | 114880               | brown |
| 236263_at   | SHH                 | 6469                 | brown |
| 236264_at   | LPHN3               | 23284                | brown |
| 236285_at   | KLHDC7B             | 113730               | brown |
| 236402_at   | BRAF                | 673                  | brown |
| 236514_at   | ACOT8               | 10005                | brown |
| 236548_at   | GIPC2               | 54810                | brown |
| 236651_at   | KALRN               | 8997                 | brown |
| 236817_at   | ADAT2               | 134637               | brown |
| 236900_x_at | CCDC163P            | 126661               | brown |
| 237003_at   | BEST3               | 144453               | brown |
| 237016_at   | TMEM217             | 221468               | brown |
| 237120_at   | KRT77               | 374454               | brown |
| 237466_s_at | HHIP                | 64399                | brown |
| 237507_at   | KRT73               | 319101               | brown |
| 237623_at   | CST3                | 1471                 | brown |
| 237732_at   | PRR9                | 574414               | brown |
| 237833_s_at | SNCAIP              | 9627                 | brown |
| 237853_x_at | KRTAP10-12          | 386685               | brown |
| 237905_at   | KRT25               | 147183               | brown |
| 237974_at   | ABHD12B /// MIR4454 | 145447 /// 100616234 | brown |
| 237981_at   | CMYA5               | 202333               | brown |
| 238001_at   | KCTD6               | 200845               | brown |
| 238168_at   | TM4SF1              | 4071                 | brown |
| 238222_at   | GKN2                | 200504               | brown |
| 238444_at   | ZNF618              | 114991               | brown |
| 238453_at   | FGFBP3              | 143282               | brown |
| 238460_at   | FAM83A              | 84985                | brown |
| 238478_at   | BNC2                | 54796                | brown |
| 238479_at   | DCUN1D5             | 84259                | brown |
| 238520_at   | TRERF1              | 55809                | brown |
| 238568_s_at | NPC1                | 4864                 | brown |
| 238575_at   | OSBPL6              | 114880               | brown |
| 238583_at   | MSRB3               | 253827               | brown |
| 238584_at   | IQCA1               | 79781                | brown |
| 238625_at   | C1orf168            | 199920               | brown |
| 238669_at   | PTGS1               | 5742                 | brown |
| 238741_at   | FAM83A              | 84985                | brown |
| 238756_at   | GAS2L3              | 283431               | brown |
| 238789_at   | KANK1               | 23189                | brown |
| 238871_at   | MLLT4               | 4301                 | brown |

|             |                     |                 |       |
|-------------|---------------------|-----------------|-------|
| 239028_at   | LYPD6               | 130574          | brown |
| 239062_at   | TNRC6C-AS1          | 100131096       | brown |
| 239082_at   | FZD3                | 7976            | brown |
| 239136_at   | UNC5B-AS1           | 728978          | brown |
| 239142_at   | RFESD               | 317671          | brown |
| 239148_at   | MARVELD3            | 91862           | brown |
| 239183_at   | ANGPTL1             | 9068            | brown |
| 239202_at   | RAB3B               | 5865            | brown |
| 239203_at   | LSMEM1              | 286006          | brown |
| 239217_x_at | ABCC3               | 8714            | brown |
| 239309_at   | DLX6                | 1750            | brown |
| 239350_at   | MARVELD3            | 91862           | brown |
| 239355_at   | GMCL1               | 64395           | brown |
| 239425_at   | DCUN1D5             | 84259           | brown |
| 239572_at   | GJA3                | 2700            | brown |
| 239582_at   | PML                 | 5371            | brown |
| 239586_at   | FAM83A              | 84985           | brown |
| 239650_at   | NCKAP5              | 344148          | brown |
| 239707_at   | SLC5A10             | 125206          | brown |
| 239719_at   | CD109               | 135228          | brown |
| 239913_at   | SLC10A4             | 201780          | brown |
| 240024_at   | SEC14L2             | 23541           | brown |
| 240306_at   | LINC00312           | 29931           | brown |
| 240388_at   | KRT27               | 342574          | brown |
| 240389_at   | TRPM6               | 140803          | brown |
| 240717_at   | ABCB5               | 340273          | brown |
| 240806_at   | RPL15               | 6138            | brown |
| 240967_at   | KRTAP19-3           | 337970          | brown |
| 241014_at   | FLG-AS1             | 339400          | brown |
| 241371_at   | TNFRSF10A           | 8797            | brown |
| 241383_at   | ZNF385C             | 201181          | brown |
| 241412_at   | BTC                 | 685             | brown |
| 241733_at   | C18orf54            | 162681          | brown |
| 241765_at   | CPM                 | 1368            | brown |
| 241851_x_at | LOC100130429        | 100130429       | brown |
| 241985_at   | JMY                 | 133746          | brown |
| 242062_at   | SAMD8               | 142891          | brown |
| 242138_at   | DLX1                | 1745            | brown |
| 242186_x_at | LPHN3               | 23284           | brown |
| 242283_at   | DNAH14              | 127602          | brown |
| 242301_at   | CBLN2               | 147381          | brown |
| 242329_at   | CREB5 /// LOC401317 | 9586 /// 401317 | brown |
| 242344_at   | GABRB2              | 2561            | brown |

|             |            |           |       |
|-------------|------------|-----------|-------|
| 242364_x_at | TNRC6C-AS1 | 100131096 | brown |
| 242417_at   | LOC283278  | 283278    | brown |
| 242450_at   | RGMB       | 285704    | brown |
| 242516_x_at | RBM46      | 166863    | brown |
| 242583_at   | STON2      | 85439     | brown |
| 242592_at   | GPR137C    | 283554    | brown |
| 242626_at   | SAMD5      | 389432    | brown |
| 242660_at   | C10orf112  | 340895    | brown |
| 242767_at   | LMCD1      | 29995     | brown |
| 242899_at   | SESN3      | 143686    | brown |
| 242906_at   | SESN3      | 143686    | brown |
| 242940_x_at | DLX6       | 1750      | brown |
| 243161_x_at | ZFP42      | 132625    | brown |
| 243167_at   | ABCB5      | 340273    | brown |
| 243403_x_at | CPM        | 1368      | brown |
| 243445_at   | BNC2       | 54796     | brown |
| 243478_at   | CHST2      | 9435      | brown |
| 243541_at   | IL31RA     | 133396    | brown |
| 243595_at   | SHB        | 6461      | brown |
| 243611_at   | MICALCL    | 84953     | brown |
| 243818_at   | SFTA1P     | 207107    | brown |
| 243843_at   | N4BP2L1    | 90634     | brown |
| 244118_at   | GABRA1     | 2554      | brown |
| 244294_at   | GTF2H5     | 404672    | brown |
| 244324_at   | C18orf54   | 162681    | brown |
| 244620_at   | SLC8A1-AS1 | 100128590 | brown |
| 244650_at   | FAM105A    | 54491     | brown |
| 244758_at   | SCAND3     | 114821    | brown |
| 34697_at    | LRP6       | 4040      | brown |
| 36564_at    | RNF19B     | 127544    | brown |
| 37408_at    | MRC2       | 9902      | brown |
| 37424_at    | CCHCR1     | 54535     | brown |
| 37425_g_at  | CCHCR1     | 54535     | brown |
| 37577_at    | ARHGAP19   | 84986     | brown |
| 38037_at    | HBEGF      | 1839      | brown |
| 38241_at    | BTN3A3     | 10384     | brown |
| 40148_at    | APBB2      | 323       | brown |
| 40420_at    | STK10      | 6793      | brown |
| 41856_at    | UNC5B      | 219699    | brown |

|              |           |        |       |
|--------------|-----------|--------|-------|
| 42361_g_at   | CCHCR1    | 54535  | brown |
| 52651_at     | COL8A2    | 1296   | brown |
| 57588_at     | SLC24A3   | 57419  | brown |
| 64488_at     | IRGQ      | 126298 | brown |
| 91684_g_at   | EXOSC4    | 54512  | brown |
| 1405_i_at    | CCL5      | 6352   | green |
| 1552398_a_at | CLEC12A   | 160364 | green |
| 1552480_s_at | PTPRC     | 5788   | green |
| 1552497_a_at | SLAMF6    | 114836 | green |
| 1552552_s_at | CLEC4C    | 170482 | green |
| 1552553_a_at | NLRC4     | 58484  | green |
| 1552584_at   | IL12RB1   | 3594   | green |
| 1552849_at   | M1AP      | 130951 | green |
| 1553260_s_at | ALS2CR11  | 151254 | green |
| 1553378_a_at | C17orf66  | 256957 | green |
| 1553645_at   | CCDC141   | 285025 | green |
| 1553906_s_at | FGD2      | 221472 | green |
| 1554240_a_at | ITGAL     | 3683   | green |
| 1554335_at   | CYTH4     | 27128  | green |
| 1554406_a_at | CLEC7A    | 64581  | green |
| 1554503_a_at | OSCAR     | 126014 | green |
| 1554519_at   | CD80      | 941    | green |
| 1554569_a_at | CELF2     | 10659  | green |
| 1554704_at   | ATP8B3    | 148229 | green |
| 1554899_s_at | FCER1G    | 2207   | green |
| 1554930_a_at | FUT8      | 2530   | green |
| 1555120_at   | CD96      | 10225  | green |
| 1555275_a_at | KLHL6     | 89857  | green |
| 1555638_a_at | SAMSN1    | 64092  | green |
| 1555728_a_at | MS4A4A    | 51338  | green |
| 1555756_a_at | CLEC7A    | 64581  | green |
| 1555962_at   | B3GNT7    | 93010  | green |
| 1555963_x_at | B3GNT7    | 93010  | green |
| 1556136_at   | MYLK4     | 340156 | green |
| 1556346_at   | COTL1     | 23406  | green |
| 1556378_a_at | LOC440896 | 440896 | green |
| 1556471_at   | SCML4     | 256380 | green |
| 1556472_s_at | SCML4     | 256380 | green |
| 1557116_at   | APOL6     | 80830  | green |
| 1558827_a_at | ZNF831    | 128611 | green |
| 1558881_at   | LINC00924 | 145820 | green |
| 1558971_at   | THEMIS    | 387357 | green |
| 1558972_s_at | THEMIS    | 387357 | green |

|              |                             |                             |       |
|--------------|-----------------------------|-----------------------------|-------|
| 1559263_s_at | ZC3H12D                     | 340152                      | green |
| 1559584_a_at | C16orf54                    | 283897                      | green |
| 1560762_at   | LOC285972                   | 285972                      | green |
| 1561226_at   | XCR1                        | 2829                        | green |
| 1562364_at   | GVINP1                      | 387751                      | green |
| 1563638_at   | TVP23A                      | 780776                      | green |
| 1563674_at   | FCRL2                       | 79368                       | green |
| 1564276_at   | C5orf56                     | 441108                      | green |
| 1564310_a_at | PARP15                      | 165631                      | green |
|              | FLJ39739 /// LINC00623 ///  |                             |       |
|              | LINC00869 /// LINC00875 /// | 57234 /// 388685 /// 728855 |       |
| 1568609_s_at | LOC728875                   | /// 728875 /// 100286793    | green |
| 1569225_a_at | SCML4                       | 256380                      | green |
| 200887_s_at  | STAT1                       | 6772                        | green |
| 201859_at    | SRGN                        | 5552                        | green |
| 202156_s_at  | CELF2                       | 10659                       | green |
| 202499_s_at  | SLC2A3                      | 6515                        | green |
| 202510_s_at  | TNFAIP2                     | 7127                        | green |
| 202524_s_at  | SPOCK2                      | 9806                        | green |
| 202625_at    | LYN                         | 4067                        | green |
| 202637_s_at  | ICAM1                       | 3383                        | green |
| 202643_s_at  | TNFAIP3                     | 7128                        | green |
| 202644_s_at  | TNFAIP3                     | 7128                        | green |
| 202663_at    | WIPF1                       | 7456                        | green |
| 202665_s_at  | WIPF1                       | 7456                        | green |
| 202803_s_at  | ITGB2                       | 3689                        | green |
| 202901_x_at  | CTSS                        | 1520                        | green |
| 202912_at    | ADM                         | 133                         | green |
| 202952_s_at  | ADAM12                      | 8038                        | green |
| 202953_at    | C1QB                        | 713                         | green |
| 202957_at    | HCLS1                       | 3059                        | green |
| 203052_at    | C2                          | 717                         | green |
| 203241_at    | UVRAG                       | 7405                        | green |
| 203305_at    | F13A1                       | 2162                        | green |
| 203320_at    | SH2B3                       | 10019                       | green |
| 203332_s_at  | INPP5D                      | 3635                        | green |
| 203402_at    | KCNAB2                      | 8514                        | green |
| 203416_at    | CD53                        | 963                         | green |
| 203471_s_at  | PLEK                        | 5341                        | green |
| 203485_at    | RTN1                        | 6252                        | green |
| 203508_at    | TNFRSF1B                    | 7133                        | green |
| 203523_at    | LSP1                        | 4046                        | green |
| 203547_at    | CD4                         | 920                         | green |

|             |                               |                             |       |
|-------------|-------------------------------|-----------------------------|-------|
| 203645_s_at | CD163                         | 9332                        | green |
| 203761_at   | SLA                           | 6503                        | green |
| 203779_s_at | MPZL2                         | 10205                       | green |
| 203879_at   | PIK3CD                        | 5293                        | green |
| 203915_at   | CXCL9                         | 4283                        | green |
| 203932_at   | HLA-DMB                       | 3109                        | green |
| 204046_at   | PLCB2                         | 5330                        | green |
| 204070_at   | RARRES3                       | 5920                        | green |
| 204103_at   | CCL4                          | 6351                        | green |
| 204122_at   | TYROBP                        | 7305                        | green |
| 204150_at   | STAB1                         | 23166                       | green |
| 204153_s_at | MFNG                          | 4242                        | green |
| 204205_at   | APOBEC3G                      | 60489                       | green |
| 204220_at   | GMFG                          | 9535                        | green |
| 204232_at   | FCER1G                        | 2207                        | green |
| 204265_s_at | GPSM3                         | 63940                       | green |
| 204352_at   | TRAF5                         | 7188                        | green |
| 204411_at   | KIF21B                        | 23046                       | green |
| 204438_at   | MRC1                          | 4360                        | green |
| 204440_at   | CD83                          | 9308                        | green |
| 204502_at   | SAMHD1                        | 25939                       | green |
| 204533_at   | CXCL10                        | 3627                        | green |
| 204563_at   | SELL                          | 6402                        | green |
| 204580_at   | MMP12                         | 4321                        | green |
| 204588_s_at | SLC7A7                        | 9056                        | green |
| 204655_at   | CCL5                          | 6352                        | green |
|             | HLA-DRB1 /// HLA-DRB4 ///     | 3123 /// 3126 /// 100507709 |       |
| 204670_x_at | LOC100507709 /// LOC100507714 | /// 100507714               | green |
| 204674_at   | LRMP                          | 4033                        | green |
| 204689_at   | HHEX                          | 3087                        | green |
| 204735_at   | PDE4A                         | 5141                        | green |
| 204770_at   | TAP2                          | 6891                        | green |
| 204774_at   | EVI2A                         | 2123                        | green |
| 204789_at   | FMNL1                         | 752                         | green |
| 204829_s_at | FOLR2                         | 2350                        | green |
| 204852_s_at | PTPN7                         | 5778                        | green |
| 204882_at   | ARHGAP25                      | 9938                        | green |
| 204891_s_at | LCK                           | 3932                        | green |
| 204912_at   | IL10RA                        | 3587                        | green |
| 204951_at   | RHOH                          | 399                         | green |
| 204959_at   | MNDA                          | 4332                        | green |
| 204960_at   | PTPRCAP                       | 5790                        | green |
| 204961_s_at | NCF1 /// NCF1B /// NCF1C      | 653361 /// 654816 ///       | green |



|             |                                |                              |       |
|-------------|--------------------------------|------------------------------|-------|
|             |                                | 654817                       |       |
| 205013_s_at | ADORA2A /// SPECC1L-ADORA2A    | 135 /// 101730217            | green |
| 205038_at   | IKZF1                          | 10320                        | green |
| 205098_at   | CCR1                           | 1230                         | green |
| 205101_at   | CIITA                          | 4261                         | green |
|             | CCL3 /// CCL3L1 /// CCL3L3 /// | 6348 /// 6349 /// 414062 /// |       |
| 205114_s_at | LOC101060267                   | 101060267                    | green |
| 205147_x_at | NCF4                           | 4689                         | green |
| 205159_at   | CSF2RB                         | 1439                         | green |
| 205180_s_at | ADAM8                          | 101                          | green |
| 205212_s_at | ACAP1                          | 9744                         | green |
| 205213_at   | ACAP1                          | 9744                         | green |
| 205269_at   | LCP2                           | 3937                         | green |
| 205270_s_at | LCP2                           | 3937                         | green |
| 205291_at   | IL2RB                          | 3560                         | green |
| 205306_x_at | KMO                            | 8564                         | green |
| 205307_s_at | KMO                            | 8564                         | green |
| 205419_at   | GPR183                         | 1880                         | green |
| 205456_at   | CD3E                           | 916                          | green |
| 205484_at   | SIT1                           | 27240                        | green |
| 205488_at   | GZMA                           | 3001                         | green |
| 205495_s_at | GNLY                           | 10578                        | green |
| 205543_at   | HSPA4L                         | 22824                        | green |
| 205554_s_at | DNASE1L3                       | 1776                         | green |
| 205639_at   | AOAH                           | 313                          | green |
| 205640_at   | ALDH3B1                        | 221                          | green |
| 205660_at   | OASL                           | 8638                         | green |
| 205668_at   | LY75                           | 4065                         | green |
| 205685_at   | CD86                           | 942                          | green |
| 205758_at   | CD8A                           | 925                          | green |
| 205786_s_at | ITGAM                          | 3684                         | green |
| 205790_at   | SKAP1                          | 8631                         | green |
| 205804_s_at | TRAF3IP3                       | 80342                        | green |
| 205819_at   | MARCO                          | 8685                         | green |
| 205821_at   | KLRC4-KLRK1 /// KLRK1          | 22914 /// 100528032          | green |
| 205831_at   | CD2                            | 914                          | green |
| 205898_at   | CX3CR1                         | 1524                         | green |
| 205987_at   | CD1C                           | 911                          | green |

|             |                       |                     |       |
|-------------|-----------------------|---------------------|-------|
| 205992_s_at | IL15                  | 3600                | green |
| 205997_at   | ADAM28                | 10863               | green |
| 206060_s_at | PTPN22                | 26191               | green |
| 206090_s_at | DISC1 /// TSNAX-DISC1 | 27185 /// 100303453 | green |
| 206118_at   | STAT4                 | 6775                | green |
| 206120_at   | CD33                  | 945                 | green |
| 206134_at   | ADAMDEC1              | 27299               | green |
| 206181_at   | SLAMF1                | 6504                | green |
| 206219_s_at | VAV1                  | 7409                | green |
| 206247_at   | MICB                  | 4277                | green |
| 206271_at   | TLR3                  | 7098                | green |
| 206296_x_at | MAP4K1                | 11184               | green |
| 206337_at   | CCR7                  | 1236                | green |
| 206366_x_at | XCL1                  | 6375                | green |
| 206370_at   | PIK3CG                | 5294                | green |
| 206407_s_at | CCL13                 | 6357                | green |
| 206502_s_at | INSM1                 | 3642                | green |
| 206513_at   | AIM2                  | 9447                | green |
| 206545_at   | CD28                  | 940                 | green |
| 206569_at   | IL24                  | 11009               | green |
| 206584_at   | LY96                  | 23643               | green |
| 206637_at   | P2RY14                | 9934                | green |
| 206666_at   | GZMK                  | 3003                | green |
| 206674_at   | FLT3                  | 2322                | green |
| 206707_x_at | FAM65B                | 9750                | green |
| 206715_at   | TFEC                  | 22797               | green |
| 206749_at   | CD1B                  | 910                 | green |
| 206761_at   | CD96                  | 10225               | green |
| 206785_s_at | KLRC1 /// KLRC2       | 3821 /// 3822       | green |
| 206804_at   | CD3G                  | 917                 | green |
| 206856_at   | LILRB5                | 10990               | green |
| 206914_at   | CRTAM                 | 56253               | green |
| 206950_at   | SCN9A                 | 6335                | green |
| 206974_at   | CXCR6                 | 10663               | green |
| 206978_at   | CCR2                  | 729230              | green |
| 206991_s_at | CCR5                  | 1234                | green |
| 207072_at   | IL18RAP               | 8807                | green |
| 207075_at   | NLRP3                 | 114548              | green |
| 207277_at   | CD209                 | 30835               | green |
| 207315_at   | CD226                 | 10666               | green |
| 207328_at   | ALOX15                | 246                 | green |
| 207339_s_at | LTB                   | 4050                | green |

|             |                                                         |                            |       |
|-------------|---------------------------------------------------------|----------------------------|-------|
| 207351_s_at | SH2D2A                                                  | 9047                       | green |
| 207376_at   | VENTX                                                   | 27287                      | green |
| 207509_s_at | LAIR2                                                   | 3904                       | green |
| 207571_x_at | THEMIS2                                                 | 9473                       | green |
| 207610_s_at | EMR2                                                    | 30817                      | green |
| 207677_s_at | NCF4                                                    | 4689                       | green |
| 207697_x_at | LILRB2                                                  | 10288                      | green |
| 207777_s_at | SP140                                                   | 11262                      | green |
| 207861_at   | CCL22                                                   | 6367                       | green |
| 207901_at   | IL12B                                                   | 3593                       | green |
| 207979_s_at | CD8B /// LOC100996919                                   | 926 /// 100996919          | green |
| 208018_s_at | HCK                                                     | 3055                       | green |
| 208121_s_at | PTPRO                                                   | 5800                       | green |
| 208146_s_at | CPVL                                                    | 54504                      | green |
| 208189_s_at | MYO7A                                                   | 4647                       | green |
| 208268_at   | ADAM28                                                  | 10863                      | green |
|             | HLA-DRB1 /// LOC100507709 ///                           | 3123 /// 100507709 ///     |       |
| 208306_x_at | LOC100507714                                            | 100507714                  | green |
| 208438_s_at | FGR                                                     | 2268                       | green |
| 208650_s_at | CD24                                                    | 100133941                  | green |
| 208651_x_at | CD24                                                    | 100133941                  | green |
| 209083_at   | CORO1A                                                  | 11151                      | green |
|             | HLA-DRB1 /// HLA-DRB4 /// HLA-DRB5 /// LOC100507709 /// | 3123 /// 3126 /// 3127 /// |       |
| 209312_x_at | LOC100507714                                            | 100507709 /// 100507714    | green |
| 209525_at   | HDGFRP3                                                 | 50810                      | green |
| 209546_s_at | APOL1                                                   | 8542                       | green |
| 209606_at   | CYTIP                                                   | 9595                       | green |
| 209619_at   | CD74                                                    | 972                        | green |
| 209670_at   | TRAC                                                    | 28755                      | green |
| 209734_at   | NCKAP1L                                                 | 3071                       | green |
| 209765_at   | ADAM19                                                  | 8728                       | green |
| 209770_at   | BTN3A1                                                  | 11119                      | green |
| 209772_s_at | CD24                                                    | 100133941                  | green |
| 209813_x_at | TARP                                                    | 445347                     | green |
| 209827_s_at | IL16                                                    | 3603                       | green |
| 209879_at   | SELPLG                                                  | 6404                       | green |
| 209882_at   | RIT1                                                    | 6016                       | green |
| 209892_at   | FUT4                                                    | 2526                       | green |
| 209901_x_at | AIF1                                                    | 199                        | green |
| 209906_at   | C3AR1                                                   | 719                        | green |
| 209924_at   | CCL18 /// LOC101060271                                  | 6362 /// 101060271         | green |

|             |                   |                 |       |
|-------------|-------------------|-----------------|-------|
| 209969_s_at | STAT1             | 6772            | green |
| 210029_at   | IDO1              | 3620            | green |
| 210031_at   | CD247             | 919             | green |
| 210038_at   | PRKCQ             | 5588            | green |
| 210140_at   | CST7              | 8530            | green |
| 210146_x_at | LILRB2            | 10288           | green |
| 210163_at   | CXCL11            | 6373            | green |
| 210164_at   | GZMB              | 3002            | green |
| 210184_at   | ITGAX             | 3687            | green |
| 210222_s_at | RTN1              | 6252            | green |
| 210321_at   | GZMH              | 2999            | green |
| 210354_at   | IFNG              | 3458            | green |
| 210356_x_at | MS4A1             | 931             | green |
| 210439_at   | ICOS              | 29851           | green |
| 210448_s_at | P2RX5             | 5026            | green |
| 210538_s_at | BIRC3             | 330             | green |
| 210607_at   | FLT3LG            | 2323            | green |
| 210784_x_at | LILRA6 /// LILRB3 | 11025 /// 79168 | green |
| 210785_s_at | THEMIS2           | 9473            | green |
| 210845_s_at | PLAUR             | 5329            | green |
| 210895_s_at | CD86              | 942             | green |
| 210915_x_at | TRBC1             | 28639           | green |
| 211122_s_at | CXCL11            | 6373            | green |
|             |                   |                 |       |
| 211138_s_at | KMO               | 8564            | green |
| 211144_x_at | TARP /// TRGC2    | 6967 /// 445347 | green |
| 211339_s_at | ITK               | 3702            | green |
| 211434_s_at | CCRL2             | 9034            | green |
| 211734_s_at | FCER1A            | 2205            | green |
| 211742_s_at | EVI2B             | 2124            | green |
| 211990_at   | HLA-DPA1          | 3113            | green |
| 211991_s_at | HLA-DPA1          | 3113            | green |
| 212268_at   | SERPINB1          | 1992            | green |
| 212588_at   | PTPRC             | 5788            | green |
| 212750_at   | PPP1R16B          | 26051           | green |
| 212827_at   | IGHM              | 3507            | green |
| 212873_at   | HMHA1             | 23526           | green |
| 213095_x_at | AIF1              | 199             | green |
| 213160_at   | DOCK2             | 1794            | green |
| 213193_x_at | TRBC1             | 28639           | green |
| 213293_s_at | TRIM22            | 10346           | green |
| 213309_at   | PLCL2             | 23228           | green |

|             |                                                         |                            |       |
|-------------|---------------------------------------------------------|----------------------------|-------|
| 213416_at   | ITGA4                                                   | 3676                       | green |
| 213475_s_at | ITGAL                                                   | 3683                       | green |
| 213537_at   | HLA-DPA1                                                | 3113                       | green |
| 213539_at   | CD3D                                                    | 915                        | green |
| 213603_s_at | RAC2                                                    | 5880                       | green |
| 213733_at   | MYO1F                                                   | 4542                       | green |
| 213790_at   | ADAM12                                                  | 8038                       | green |
| 213888_s_at | TRAF3IP3                                                | 80342                      | green |
| 213915_at   | NKG7                                                    | 4818                       | green |
| 213975_s_at | LYZ                                                     | 4069                       | green |
| 214032_at   | ZAP70                                                   | 7535                       | green |
| 214038_at   | CCL8                                                    | 6355                       | green |
| 214054_at   | DOK2                                                    | 9046                       | green |
| 214084_x_at | NCF1C                                                   | 654817                     | green |
| 214180_at   | MAN1C1                                                  | 57134                      | green |
| 214219_x_at | MAP4K1                                                  | 11184                      | green |
| 214339_s_at | MAP4K1                                                  | 11184                      | green |
| 214450_at   | CTSW                                                    | 1521                       | green |
| 214467_at   | GPR65                                                   | 8477                       | green |
| 214470_at   | KLRB1                                                   | 3820                       | green |
| 214567_s_at | XCL1 /// XCL2                                           | 6375 /// 6846              | green |
| 214572_s_at | INSL3                                                   | 3640                       | green |
| 214617_at   | PRF1                                                    | 5551                       | green |
| 214735_at   | IPCEF1                                                  | 26034                      | green |
| 215049_x_at | CD163                                                   | 9332                       | green |
| 215051_x_at | AIF1                                                    | 199                        | green |
|             | HLA-DRB1 /// HLA-DRB3 /// HLA-DRB4 /// LOC100507709 /// | 3123 /// 3125 /// 3126 /// |       |
| 215193_x_at | LOC100507714                                            | 100507709 /// 100507714    | green |
| 215305_at   | PDGFRA                                                  | 5156                       | green |
| 215332_s_at | CD8B /// LOC100996919                                   | 926 /// 100996919          | green |
| 215784_at   | CD1E                                                    | 913                        | green |
| 215806_x_at | TARP /// TRGC2                                          | 6967 /// 445347            | green |
| 215967_s_at | LY9                                                     | 4063                       | green |
| 215979_s_at | SLC7A1                                                  | 6541                       | green |
| 216233_at   | CD163                                                   | 9332                       | green |
| 216250_s_at | LPXN                                                    | 9404                       | green |
| 216714_at   | CCL13                                                   | 6357                       | green |
| 216748_at   | PYHIN1                                                  | 149628                     | green |
| 216920_s_at | TARP /// TRGC2                                          | 6967 /// 445347            | green |
| 217147_s_at | TRAT1                                                   | 50852                      | green |
| 217371_s_at | IL15                                                    | 3600                       | green |
| 217418_x_at | MS4A1                                                   | 931                        | green |

|             |                     |                     |       |
|-------------|---------------------|---------------------|-------|
| 217478_s_at | HLA-DMA             | 3108                | green |
| 217767_at   | C3                  | 718                 | green |
| 218232_at   | C1QA                | 712                 | green |
| 218345_at   | TMEM176A            | 55365               | green |
| 218600_at   | LIMD2               | 80774               | green |
| 218724_s_at | TGIF2               | 60436               | green |
| 218870_at   | ARHGAP15            | 55843               | green |
| 219014_at   | PLAC8               | 51316               | green |
| 219045_at   | RHOF                | 54509               | green |
| 219161_s_at | CKLF /// CKLF-CMTM1 | 51192 /// 100529251 | green |
| 219183_s_at | CYTH4               | 27128               | green |
| 219209_at   | IFIH1               | 64135               | green |
| 219279_at   | DOCK10              | 55619               | green |
| 219385_at   | SLAMF8              | 56833               | green |
| 219386_s_at | SLAMF8              | 56833               | green |
| 219387_at   | CCDC88A             | 55704               | green |
| 219452_at   | DPEP2               | 64174               | green |
| 219471_at   | KIAA0226L           | 80183               | green |
| 219505_at   | CECR1               | 51816               | green |
| 219506_at   | C1orf54             | 79630               | green |
| 219519_s_at | SIGLEC1             | 6614                | green |
| 219574_at   |                     | 1-Mar 55016         | green |
| 219593_at   | SLC15A3             | 51296               | green |
| 219594_at   | NINJ2               | 4815                | green |
| 219607_s_at | MS4A4A              | 51338               | green |
| 219620_x_at | TOR4A               | 54863               | green |
| 219666_at   | MS4A6A              | 64231               | green |
| 219690_at   | IGFLR1              | 79713               | green |
| 219716_at   | APOL6               | 80830               | green |
| 219812_at   | PVRIG               | 79037               | green |
| 219885_at   | SLFN12              | 55106               | green |
| 219892_at   | TM6SF1              | 53346               | green |
| 219947_at   | CLEC4A              | 50856               | green |
| 220000_at   | SIGLEC5             | 8778                | green |
| 220005_at   | P2RY13              | 53829               | green |
| 220032_at   | CPED1               | 79974               | green |
| 220112_at   | ANKRD55             | 79722               | green |
| 220330_s_at | SAMSN1              | 64092               | green |
| 220358_at   | BATF3               | 55509               | green |
| 220418_at   | UBASH3A             | 53347               | green |
| 220423_at   | PLA2G2D             | 26279               | green |
| 220485_s_at | SIRPG               | 55423               | green |
| 220532_s_at | TMEM176B            | 28959               | green |

|             |           |        |       |
|-------------|-----------|--------|-------|
| 220560_at   | C11orf21  | 29125  | green |
| 220577_at   | GVINP1    | 387751 | green |
| 220749_at   | C10orf68  | 79741  | green |
| 221058_s_at | CKLF      | 51192  | green |
| 221080_s_at | DENND1C   | 79958  | green |
| 221087_s_at | APOL3     | 80833  | green |
| 221218_s_at | TPK1      | 27010  | green |
| 221241_s_at | BCL2L14   | 79370  | green |
| 221487_s_at | ENSA      | 2029   | green |
| 221601_s_at | FAIM3     | 9214   | green |
| 221698_s_at | CLEC7A    | 64581  | green |
| 221724_s_at | CLEC4A    | 50856  | green |
| 222868_s_at | IL18BP    | 10068  | green |
| 223280_x_at | MS4A6A    | 64231  | green |
| 223303_at   | FERMT3    | 83706  | green |
| 223343_at   | MS4A7     | 58475  | green |
| 223501_at   | TNFSF13B  | 10673  | green |
| 223533_at   | LRRC8C    | 84230  | green |
| 223562_at   | PARVG     | 64098  | green |
| 223640_at   | HCST      | 10870  | green |
| 223710_at   | CCL26     | 10344  | green |
| 223725_at   | LINC00852 | 84657  | green |
| 223922_x_at | MS4A6A    | 64231  | green |
| 224356_x_at | MS4A6A    | 64231  | green |
| 224357_s_at | MS4A4A    | 51338  | green |
| 224451_x_at | ARHGAP9   | 64333  | green |
| 224480_s_at | AGPAT9    | 84803  | green |
| 224909_s_at | PREX1     | 57580  | green |
| 225285_at   | BCAT1     | 586    | green |
| 225353_s_at | C1QC      | 714    | green |
| 225415_at   | DTX3L     | 151636 | green |
| 225602_at   | GLIPR2    | 152007 | green |
| 225701_at   | AKNA      | 80709  | green |
| 225763_at   | RCSD1     | 92241  | green |
| 225973_at   | TAP2      | 6891   | green |
| 226136_at   | GLIPR1    | 11010  | green |
| 226142_at   | GLIPR1    | 11010  | green |
| 226218_at   | IL7R      | 3575   | green |
| 226219_at   | ARHGAP30  | 257106 | green |

|             |                       |                    |       |
|-------------|-----------------------|--------------------|-------|
| 226333_at   | IL6R                  | 3570               | green |
| 226423_at   | PAQR8                 | 85315              | green |
| 226436_at   | RASSF4                | 83937              | green |
| 226517_at   | BCAT1                 | 586                | green |
| 226603_at   | SAMD9L                | 219285             | green |
| 226641_at   | ANKRD44               | 91526              | green |
| 226673_at   | SH2D3C                | 10044              | green |
| 226743_at   | SLFN11                | 91607              | green |
| 226777_at   | ADAM12 /// ADAM12-OT1 | 8038 /// 100967225 | green |
| 226818_at   | MPEG1                 | 219972             | green |
| 226841_at   | MPEG1                 | 219972             | green |
| 226878_at   | HLA-DOA               | 3111               | green |
| 226879_at   | HVCN1                 | 84329              | green |
| 226906_s_at | ARHGAP9               | 64333              | green |
| 227002_at   | FAM78A                | 286336             | green |
| 227030_at   | IKZF3                 | 22806              | green |
| 227145_at   | LOXL4                 | 84171              | green |
| 227168_at   | MIAT                  | 440823             | green |
| 227266_s_at | FYB                   | 2533               | green |
| 227344_at   | IKZF1                 | 10320              | green |
| 227346_at   | IKZF1                 | 10320              | green |
| 227353_at   | TMC8                  | 147138             | green |
| 227552_at   |                       | 1-Sep 1731         | green |
| 227553_at   | PIK3R5                | 23533              | green |
| 227609_at   | EPSTI1                | 94240              | green |
| 227645_at   | PIK3R5                | 23533              | green |
| 227647_at   | KCNE3                 | 10008              | green |
| 227677_at   | JAK3                  | 3718               | green |
| 227749_at   | POU2F2                | 5452               | green |
| 227867_at   | TRABD2A               | 129293             | green |
| 227877_at   | ANXA2R                | 389289             | green |
| 228055_at   | NAPSB                 | 256236             | green |
| 228056_s_at | NAPSB                 | 256236             | green |
| 228071_at   | GIMAP7                | 168537             | green |
| 228094_at   | AMICA1                | 120425             | green |
| 228113_at   | RAB37                 | 326624             | green |
| 228167_at   | KLHL6                 | 89857              | green |
| 228258_at   | TBC1D10C              | 374403             | green |
| 228298_at   | PCED1B                | 91523              | green |
| 228362_s_at | FAM26F                | 441168             | green |
| 228532_at   | C1orf162              | 128346             | green |
| 228592_at   | MS4A1                 | 931                | green |
| 228599_at   | MS4A1                 | 931                | green |



|             |                               |       |                             |       |
|-------------|-------------------------------|-------|-----------------------------|-------|
| 228677_s_at | RASAL3                        |       | 64926                       | green |
| 228869_at   | SNX20                         |       | 124460                      | green |
| 229029_at   | CAMK4                         |       | 814                         | green |
| 229383_at   |                               | 1-Mar | 55016                       | green |
| 229390_at   | FAM26F                        |       | 441168                      | green |
| 229391_s_at | FAM26F                        |       | 441168                      | green |
| 229437_at   | MIR155 /// MIR155HG           |       | 114614 /// 406947           | green |
| 229510_at   | MS4A14                        |       | 84689                       | green |
| 229585_at   | ADAMTSL1                      |       | 92949                       | green |
| 229597_s_at | WDFY4                         |       | 57705                       | green |
| 229619_at   | FOLR2                         |       | 2350                        | green |
| 229625_at   | GBP5                          |       | 115362                      | green |
| 229723_at   | TAGAP                         |       | 117289                      | green |
| 229779_at   | COL4A4                        |       | 1286                        | green |
|             | LOC100132999 /// LOC100996473 |       |                             |       |
|             | /// LOC100996720 ///          |       | 642441 /// 730256 ///       |       |
|             | LOC100996740 /// LOC101060404 |       | 100132999 /// 100996473 /// |       |
|             | /// LOC101060562 ///          |       | 100996720 /// 100996740 /// |       |
|             | LOC101060645 /// LOC101060698 |       | 101060404 /// 101060562 /// |       |
| 229872_s_at | /// LOC642441 /// LOC730256   |       | 101060645 /// 101060698     | green |
| 230000_at   | RNF213                        |       | 57674                       | green |
| 230025_at   | GJD3                          |       | 125111                      | green |
| 230036_at   | SAMD9L                        |       | 219285                      | green |
| 230110_at   | MCOLN2                        |       | 255231                      | green |
| 230261_at   | ST8SIA4                       |       | 7903                        | green |
| 230391_at   | CD84                          |       | 8832                        | green |
| 230422_at   | FPR3                          |       | 2359                        | green |
| 230499_at   | BIRC3                         |       | 330                         | green |
| 230550_at   | MS4A6A                        |       | 64231                       | green |
| 230753_at   | PATL2                         |       | 197135                      | green |
| 230756_at   | ZNF683                        |       | 257101                      | green |
| 230805_at   | MIR142                        |       | 406934                      | green |
| 230836_at   | ST8SIA4                       |       | 7903                        | green |
| 230867_at   | COL6A6                        |       | 131873                      | green |
| 230925_at   | APBB1IP                       |       | 54518                       | green |
| 230966_at   | IL4I1                         |       | 259307                      | green |
| 230980_x_at | MIR142                        |       | 406934                      | green |
| 230983_at   | FAM129C                       |       | 199786                      | green |
| 231093_at   | FCRL3                         |       | 115352                      | green |
| 231124_x_at | LY9                           |       | 4063                        | green |
| 231406_at   | ORAI2                         |       | 80228                       | green |
| 231776_at   | EOMES                         |       | 8320                        | green |
| 231911_at   | ERMN                          |       | 57471                       | green |

|             |                   |                   |       |
|-------------|-------------------|-------------------|-------|
| 232001_at   | PRKCQ-AS1         | 439949            | green |
| 232024_at   | GIMAP2            | 26157             | green |
| 232234_at   | SLA2              | 84174             | green |
| 232383_at   | TFEC              | 22797             | green |
| 232543_x_at | ARHGAP9           | 64333             | green |
| 232617_at   | CTSS              | 1520              | green |
| 232724_at   | MS4A6A            | 64231             | green |
| 233086_at   | FAM209A           | 200232            | green |
| 233510_s_at | PARVG             | 64098             | green |
| 234165_at   | PTGDR             | 5729              | green |
| 234974_at   | GALM              | 130589            | green |
| 235080_at   | CLUAP1            | 23059             | green |
| 235175_at   | GBP4              | 115361            | green |
| 235353_at   | SEL1L3            | 23231             | green |
| 235458_at   | HAVCR2            | 84868             | green |
| 235529_x_at | SAMHD1            | 25939             | green |
| 235556_at   | CREBRF            | 153222            | green |
| 235574_at   | GBP4              | 115361            | green |
| 235735_at   | TNFSF8            | 944               | green |
| 235964_x_at | SAMHD1            | 25939             | green |
| 236226_at   | BTLA              | 151888            | green |
| 236295_s_at | NLRC3             | 197358            | green |
| 236539_at   | PTPN22            | 26191             | green |
| 236583_at   | GIMAP1            | 170575            | green |
| 236673_at   | TIFAB             | 497189            | green |
| 236782_at   | SAMD3             | 154075            | green |
| 236854_at   | LINC00494         | 284749            | green |
| 236995_x_at | TFEC              | 22797             | green |
| 237753_at   | IL21R             | 50615             | green |
| 238429_at   | TMEM71            | 137835            | green |
| 238581_at   | GBP5              | 115362            | green |
| 238600_at   | JAKMIP1           | 152789            | green |
| 238621_at   | FMN1              | 342184            | green |
| 238725_at   | IRF1              | 3659              | green |
| 239427_at   | SLAMF1            | 6504              | green |
| 239529_at   | C5orf20 /// TIFAB | 140947 /// 497189 | green |
| 239802_at   | SAP30L            | 79685             | green |
| 240070_at   | TIGIT             | 201633            | green |
| 240413_at   | PYHIN1            | 149628            | green |
| 240862_at   | RASGRP4           | 115727            | green |
| 241791_at   | TTN               | 7273              | green |
| 241819_at   | TNFSF8            | 944               | green |

|             |                        |                    |       |
|-------------|------------------------|--------------------|-------|
| 241871_at   | CAMK4                  | 814                | green |
| 242268_at   | CELF2                  | 10659              | green |
| 242388_x_at | TAGAP                  | 117289             | green |
| 242641_at   | COL6A6                 | 131873             | green |
| 242916_at   | CNTRL                  | 11064              | green |
| 242945_at   | FAM20A                 | 54757              | green |
| 243099_at   | NFAM1                  | 150372             | green |
| 243601_at   | LOC285957              | 285957             | green |
| 243602_at   | MGC40069               | 348035             | green |
| 243968_x_at | FCRL1                  | 115350             | green |
| 244251_at   | LCP2                   | 3937               | green |
| 244313_at   | CR1                    | 1378               | green |
| 244413_at   | CLECL1                 | 160365             | green |
| 244578_at   | LCP2                   | 3937               | green |
| 244598_at   | LCP2                   | 3937               | green |
| 266_s_at    | CD24                   | 100133941          | green |
| 32128_at    | CCL18 /// LOC101060271 | 6362 /// 101060271 | green |
| 33197_at    | MYO7A                  | 4647               | green |
| 35974_at    | LRMP                   | 4033               | green |
| 37145_at    | GNLY                   | 10578              | green |
| 38149_at    | ARHGAP25               | 9938               | green |
| 38487_at    | STAB1                  | 23166              | green |
| 41577_at    | PPP1R16B               | 26051              | green |
| 44673_at    | SIGLEC1                | 6614               | green |
| 44790_s_at  | KIAA0226L              | 80183              | green |
